# Supplementary material for: Differential impact of physical distancing strategies on social contacts relevant for the spread of SARS-CoV-2: evidence from a cross-national online survey, March–April 2020
Source: PubMed Central journal article supplement — BMJ Open. 2021 Oct 20;11(10):e050651. doi: 10.1136/bmjopen-2021-050651 (PMC8532142; doi:10.1136/bmjopen-2021-050651), 2021-10-20
Supplement: bmjopen-2021-050651.draft_revisions.pdf [file bmjopen-2021-050651.draft_revisions.pdf]

# BMJ Open

BMJ Open is committed to open peer review. As part of this commitment we make the peer review history of every article we publish publicly available.

When an article is published we post the peer reviewers' comments and the authors' responses online. We also post the versions of the paper that were used during peer review. These are the versions that the peer review comments apply to.

The versions of the paper that follow are the versions that were submitted during the peer review process. They are not the versions of record or the final published versions. They should not be cited or distributed as the published version of this manuscript.

BMJ Open is an open access journal and the full, final, typeset and author-corrected version of record of the manuscript is available on our site with no access controls, subscription charges or pay-per-view fees (<http://bmjopen.bmj.com>).

If you have any questions on BMJ Open's open peer review process please email [info.bmjopen@bmj.com](mailto:info.bmjopen@bmj.com)

# BMJ Open

## The differential impact of physical distancing strategies on social contacts relevant for the spread of SARS-CoV-2: Evidence from the Covid-19 Health Behaviour Survey

|                               |                                                                                                                                                                                                                                                                                                                                                                                                                                          |
|-------------------------------|------------------------------------------------------------------------------------------------------------------------------------------------------------------------------------------------------------------------------------------------------------------------------------------------------------------------------------------------------------------------------------------------------------------------------------------|
| Journal:                      | <i>BMJ Open</i>                                                                                                                                                                                                                                                                                                                                                                                                                          |
| Manuscript ID                 | bmjopen-2021-050651                                                                                                                                                                                                                                                                                                                                                                                                                      |
| Article Type:                 | Original research                                                                                                                                                                                                                                                                                                                                                                                                                        |
| Date Submitted by the Author: | 25-Feb-2021                                                                                                                                                                                                                                                                                                                                                                                                                              |
| Complete List of Authors:     | Del Fava, Emanuele; Max-Planck-Institute for Demographic Research Cimentada, Jorge; Max-Planck-Institute for Demographic Research Perrotta, Daniela; Max-Planck-Institute for Demographic Research Grow, André; Max-Planck-Institute for Demographic Research Rampazzo, Francesco; University of Oxford Gil-Clavel, Sofia; Max-Planck-Institute for Demographic Research Zaghenni, Emilio; Max-Planck-Institute for Demographic Research |
| Keywords:                     | COVID-19, World Wide Web technology < BIOTECHNOLOGY & BIOINFORMATICS, Public health < INFECTIOUS DISEASES, Epidemiology < INFECTIOUS DISEASES                                                                                                                                                                                                                                                                                            |
|                               |                                                                                                                                                                                                                                                                                                                                                                                                                                          |

SCHOLARONE™  
Manuscripts

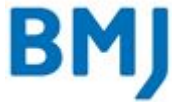

I, the Submitting Author has the right to grant and does grant on behalf of all authors of the Work (as defined in the below author licence), an exclusive licence and/or a non-exclusive licence for contributions from authors who are: i) UK Crown employees; ii) where BMJ has agreed a CC-BY licence shall apply, and/or iii) in accordance with the terms applicable for US Federal Government officers or employees acting as part of their official duties; on a worldwide, perpetual, irrevocable, royalty-free basis to BMJ Publishing Group Ltd ("BMJ") its licensees and where the relevant Journal is co-owned by BMJ to the co-owners of the Journal, to publish the Work in this journal and any other BMJ products and to exploit all rights, as set out in our [licence](#).

The Submitting Author accepts and understands that any supply made under these terms is made by BMJ to the Submitting Author unless you are acting as an employee on behalf of your employer or a postgraduate student of an affiliated institution which is paying any applicable article publishing charge ("APC") for Open Access articles. Where the Submitting Author wishes to make the Work available on an Open Access basis (and intends to pay the relevant APC), the terms of reuse of such Open Access shall be governed by a Creative Commons licence – details of these licences and which [Creative Commons](#) licence will apply to this Work are set out in our licence referred to above.

Other than as permitted in any relevant BMJ Author's Self Archiving Policies, I confirm this Work has not been accepted for publication elsewhere, is not being considered for publication elsewhere and does not duplicate material already published. I confirm all authors consent to publication of this Work and authorise the granting of this licence.

1  
2  
3 1 **The differential impact of physical distancing strategies on social contacts relevant for the spread of**  
4  
5 2 **SARS-CoV-2: Evidence from the Covid-19 Health Behaviour Survey**  
6

7  
8  
9  
10 4 Emanuele Del Fava<sup>1</sup>, Jorge Cimentada<sup>1</sup>, Daniela Perrotta<sup>1</sup>, André Grow<sup>1</sup>, Francesco Rampazzo<sup>2</sup>, Sofia  
11 5 Gil-Clavel<sup>1</sup>, Emilio Zagheni<sup>1</sup>  
12  
13

14 6  
15  
16 7 <sup>1</sup> Max Planck Institute for Demographic Research, Rostock, Germany.

17  
18 8 <sup>2</sup> Saïd Business School, Leverhulme Centre for Demographic Science, and Nuffield College, University  
19 9 of Oxford, Oxford, United Kingdom.  
20  
21

22 10  
23  
24 11 **Corresponding author**

25  
26 12 Emanuele Del Fava, Max Planck Institute for Demographic Research, Konrad-Zuse-Str. 6, 18057 Rostock  
27 13 (Germany), email: [delfava@demogr.mpg.de](mailto:delfava@demogr.mpg.de)  
28  
29  
30  
31 14

1  
2  
3 15 **ABSTRACT**  
4

5 16 **Background:** Although physical distancing measures are intended to mitigate the spread of COVID-19,  
6  
7 17 their impact on social contacts and disease transmission remains unclear. Obtaining highly granular  
8  
9 18 temporal data on social contact patterns is key to assess the impact of such protective measures.

10  
11 19 **Methods:** We conducted an online opt-in survey based on targeted Facebook advertising campaigns  
12  
13 20 across seven European countries (Belgium, France, Germany, Italy, Netherlands, Spain, United Kingdom  
14  
15 21 (UK)) and the United States (US), achieving a sample of 53,708 questionnaires in the period March 13–  
16  
17 22 April 13, 2020. Post-stratification weights were produced to correct for biases. Data on social contact  
18  
19 23 numbers, protective behaviour and perceived level of threat were collected and used to estimate the  
20  
21 24 weekly net reproduction number,  $R_t$ .

22  
23 25 **Results:** Evidence from the US and UK showed that the number of daily contacts mainly decreased after  
24  
25 26 governments issued the first physical distancing guidelines. In mid-April, daily social contact numbers had  
26  
27 27 decreased between 49% in Germany and 83% in Italy with respect to pre-COVID levels, ranging from  
28  
29 28 below three contacts per day in France, Spain, and the UK, to four in Germany and the Netherlands. Such  
30  
31 29 reductions, which were uniform across age groups, were sufficient to bring  $R_t$  to one or even below in all  
32  
33 30 countries, except Germany.

34  
35 31 **Conclusions:** We provided the first comparable set of statistics on social contact patterns during the  
36  
37 32 COVID-19 pandemic for eight high-income countries, disaggregated by week, which could be leveraged  
38  
39 33 by the scientific community for developing more realistic epidemic models of COVID-19.  
40  
41 34

42  
43 35 **Keywords:** COVID-19, online survey, social contacts, non-pharmaceutical interventions, reproduction  
44  
45 36 number, Europe, United States.  
46  
47  
48  
49  
50  
51  
52  
53  
54  
55  
56  
57  
58  
59  
60

### 37 **Strengths and limitations of this study**

- 38 • We provide a comparable set of statistics on daily social contact numbers, broken down by setting  
39 and calendar week, collected via online surveys between March and April 2020, in the early  
40 phase of the COVID-19 pandemic, for eight high-income countries (Belgium, Germany, France,  
41 Italy, the Netherlands, Spain, the United Kingdom, and the United States).
- 42 • Contact numbers decreased in all countries over the survey period. Controlling for socio-  
43 demographic and behavioural factors, such as the increased use of face coverings and avoidance  
44 of social activities, we find that these contact reductions are associated with a decline in the  
45 effective reproduction number over time, as it decreased below one in almost all surveyed  
46 countries.
- 47 • We show that the use of targeted Facebook advertisements to capture changes in health  
48 behaviours offers an efficient way to obtain timely data during a public health emergency, such as  
49 the COVID-19 pandemic.
- 50 • To deal with the issue of self-selection bias common in opt-in surveys and its consequences for  
51 sample representativeness, we stratify the Facebook ads and compute post-stratification weights  
52 based on age, sex, and region, which are all substantively linked to both survey participation and  
53 the outcomes of interest. We cannot, however, adjust for other possible sources social inequality  
54 among Facebook users (e.g., education level or ethnicity), as such variables cannot be included in  
55 the design of the ads.
- 56 • We cap contact numbers using two different thresholds to deal with the presence of extremely  
57 high contact numbers and removed from the analysis those individuals with reported contact  
58 numbers above these thresholds. Nonetheless, we find that our results are robust to threshold  
59 choice.

60

## 61 INTRODUCTION

62 The coronavirus disease 2019 (COVID-19) epidemic has shown the importance of implementing non-  
63 pharmaceutical interventions (NPIs), like physical distancing, to contain the spread of infectious diseases  
64 and to avoid over-burdening health care systems. As the strain of the virus (SARS-CoV-2) that causes the  
65 disease spreads from person to person through infected secretions like saliva or respiratory droplets from  
66 the nose or mouth, disease transmission mainly occurs via close social contacts, generally when  
67 susceptible individuals breathe in droplets from infected ones, even though transmission through aerosols  
68 cannot be ruled out [1,2].

69 In the early phase of the pandemic, in the absence of a vaccine and effective antiviral treatments,  
70 the public health measures introduced to contain the disease were largely NPIs aimed at reducing the  
71 number of social contacts, e.g., travel restrictions, school closures, the cancellation of large gatherings, the  
72 promotion of physical distancing practices, and, in some countries, nationwide lockdowns. Quantifying  
73 changes in social contact patterns in response to these interventions is key to (i) improve our understanding  
74 of the determinants of disease transmission, (ii) enable researchers to design more realistic epidemic  
75 models, and, ultimately, (iii) assess the effectiveness of public health measures designed to contain the  
76 disease and prevent new waves of infection [3,4]. So far, information about contact patterns under the  
77 implemented NPIs has become available only for a limited number of countries in Asia [5], Europe [6–10],  
78 Africa [11], and North America [12,13].

79 In this study, we leverage new opportunities for data collection, enabled by the digitalization of  
80 our lives, to assess daily changes in social contact patterns across countries, and to examine their  
81 implications for the spread of SARS-CoV-2. We conducted a cross-national online survey, the COVID-19  
82 Health Behaviour Survey, for which we recruited participants via targeted Facebook advertisements  
83 stratified by sex, age, and subnational region [14,15]. One goal of the survey was to evaluate the extent to  
84 which social contact numbers changed across countries and over time, especially in comparison with  
85 those observed prior to the pandemic. We used comparable metrics in our survey, which we conducted in  
86 Belgium, France, Germany, Italy, the Netherlands, Spain, the United Kingdom (UK), and the United

1  
2  
3 87 States (US), from March 13 - April 13, 2020, a key period during which the global pandemic was well  
4  
5 88 underway, even though it was at different stages across countries. We measured participants' social  
6  
7 89 contacts, as well as their health behaviours and perceived risk of the coronavirus, across demographic  
8  
9 90 groups, and quantified the relative impact of the reductions in social contact numbers on the net  
10  
11 91 reproduction number ( $R_t$ , the average number of secondary infection cases generated by an infectious  
12  
13 92 individual at time  $t$ ) of COVID-19.  
14  
15  
16 93

## 17 18 94 **METHODS**

### 19 20 95 **Study design**

21  
22 96 We designed the COVID-19 Health Behaviour Survey as a multi-country, cross-sectional, opt-in online  
23  
24 97 survey, to collect key information on people's health and behaviour during the COVID-19 pandemic [14].  
25  
26 98 Recruitment occurred via targeted Facebook advertisements stratified by sex, age group (18-24y, 25-44y,  
27  
28 99 45-64y, and 65y+), and region, which ensured that a minimum number of respondents could be reached in  
29  
30 100 each stratum [16,17]. Post-stratification weights by sex, age group, and region, based on nationally  
31  
32 101 representative census data [18,19], were used in all analyses. Ethical approval for the study was obtained  
33  
34 102 from the Ethics Council of the Max Planck Society. Participation was anonymous and voluntary, and  
35  
36 103 open to people aged 18 or older who gave their informed consent. This study was funded with support  
37  
38 104 from the Max Planck Institute for Demographic Research, which is part of the Max Planck Society.

39 105 We asked respondents to report the number of individuals with whom they had interacted on the  
40  
41 106 day prior to the survey in different settings, i.e., at home, at school, at work, and in the general community  
42  
43 107 (such as during commuting or leisure activities). We calculated the overall number of daily contacts per  
44  
45 108 person as the sum of contacts in the four different settings, after removing participants who reported more  
46  
47 109 contacts than the 90% quantile of the contact distribution for the respective setting. This choice was  
48  
49 110 motivated by the need to remove low-quality responses with implausibly high contact numbers and is  
50  
51 111 consistent with threshold choices made in seminal contact surveys in the past. For example, our results  
52  
53 112 were robust to the choice of the threshold, as we also considered a fixed cut-off point equal to 29 contacts  
54  
55  
56  
57  
58  
59  
60



1  
2  
3 113 used in the literature [4], under which contact numbers were generally slightly higher (Supplementary  
4  
5 114 Tables S9-S16).

6  
7 115 We also asked participants to report on their perceived level of threat related to the coronavirus  
8  
9 116 and on protective behaviours that likely have an impact on disease transmissibility [20], namely, washing  
10  
11 117 their hands more often, wearing a face covering, and avoiding social activities.  
12  
13

14 118

### 15 16 119 **Statistical analysis**

17  
18 120 We modelled the number of daily contacts reported by participants over the study period using negative  
19  
20 121 binomial regression to account for possible over-dispersion in the contact data and adjusting for  
21  
22 122 respondents' socio-demographic and behavioural characteristics [21]. The socio-demographic factors that  
23  
24 123 we included as categorical variables were sex, age, region of residence, highest level of education,  
25  
26 124 working status, household size, day of the week of the reported contacts, and being foreign-born. The  
27  
28 125 variable age was also used in an interaction with the week of the reported contacts, to test for different  
29  
30 126 contacts patterns between younger and older adults as time went by. The behavioural factors that we  
31  
32 127 included encompassed dichotomous variables for each protective behaviour and a feeling of threat index,  
33  
34 128 based on the simple mean of two different indicators, i.e., the feeling of threat to oneself (much higher for  
35  
36 129 older adults than for the 18-24 group) [14] and the feeling of threat to the family. Interactions between  
37  
38 130 these behavioural factors and the weeks were also included, to account for the time-varying nature of  
39  
40 131 these factors.  
41  
42

43 132

### 44 45 133 **Patient and public involvement**

46  
47 134 We did not involve the respondents in the design of the study. However, as the survey was disseminated  
48  
49 135 through Facebook ads, users could leave posts on the study page and review the page itself. To maintain  
50  
51 136 trust with both current and prospective participants, we engaged with user comments and provided  
52  
53 137 additional information if requested [15].  
54  
55

56 138

### 139 **Epidemiological modelling approach**

140 We assessed the consequences of the reduction in social contact numbers for the net reproduction number  
141 ( $R_t$ , i.e., the average number of new infections generated by an infectious person at time  $t$  in a population,  
142 either partially or fully susceptible, considering the current interventions and the potential spontaneous  
143 behavioural change in response to the risk of infection [22–24]). We compared our contact data with  
144 those collected prior to the epidemic, either from the POLYMOD study (Belgium, Germany, Italy, the  
145 Netherlands, and the UK) [4], or from the Comes-F study (France) [25], and we derived age-specific  
146 social contact matrices  $\mathbf{C}$  compatible with the demographic structure of each country at the beginning of  
147 2020 [26].

148 We hypothesized that (i) the basic reproduction number  $R_0$  of the infection was consistent with  
149 social mixing as measured prior to COVID-19, under the assumption of absence of immunity in the  
150 population and of any behavioural change and interventions; (ii) infection parameters, such as the length  
151 of the infectiousness and the infection transmissibility, did not change over time; (iii) the initial contact  
152 matrices of Italy and the UK could be a reasonable replacement of contact patterns of Spain and the US,  
153 because of cultural similarity, after projecting them on the respective demographic structures.

154 We obtained weekly contact matrices  $\mathbf{C}_w^{cov}$  multiplying the normalised pre-COVID contact  
155 matrices  $\mathbf{C}^{pre}$  by the average number of daily contacts by age group on each week (more details on  
156 matrix construction in the Supplementary Material). We finally computed the weekly values of  $R_t^w$  as  $R_t^w$   
157  $= R_0 f_R^w$ , where the weekly reduction factor  $f_R^w$  was given by the ratio between the dominant eigenvalue  
158 of the weekly contact matrix and that of the pre-COVID matrix, i.e.,  $f_R^w = \rho(\mathbf{C}_w^{cov})/\rho(\mathbf{C}^{pre})$ .

159 Our estimates of  $R_t^w$  accounted for three sources of uncertainty, namely, (i) the baseline basic  
160 reproduction number  $R_0$ , which, according to a meta-analysis of the literature, we assumed to be normally  
161 distributed with mean 2.6 and standard deviation 0.54, resulting in the 95% confidence interval (CI) (1.54,  
162 3.66) [8,27]; (ii) the weekly predictions of the daily overall number of contacts, assumed to be normally  
163 distributed with mean and standard deviation coming from our predictions; (iii) the pre-COVID contact

164 matrices, which were derived by applying nonparametric bootstrap to the original data. For each source of  
165 uncertainty, 5,000 replicates were taken.

166

## 167 **RESULTS**

168 The final sample consisted of 53,718 individuals who (i) completed the questionnaire between March 13  
169 and April 13, 2020, (ii) provided the information on sex, age group, and region of residence, necessary for  
170 the computation of the post-stratification weights, and (iii) reported knowing at least something about the  
171 coronavirus outbreak at the time of their survey participation. Their distribution by sex, age, and region  
172 before and after applying post-stratification weights is shown in Supplementary Tables S1-S8. Weighted  
173 averages of daily contact numbers by threshold, country, calendar week, and setting, both overall and  
174 stratified by region, age group and sex, can be found in the Supplementary Data.

175 Individual social contacts decreased during the study period in all surveyed countries, plateauing  
176 at the lowest levels between calendar week 13 (March 23 – 29) and calendar week 14 (March 30 – April  
177 5) (Fig. 1). Evidence from the UK and the US showed that the overall numbers of daily social contacts  
178 declined considerably after governments issued physical distancing guidelines, mainly occurring during  
179 week 11 (March 9 – 15), rather than after more stringent lockdown measures were announced. Comparing  
180 trends before and after the announcement of physical distancing measures, both occurring between March  
181 10 and March 19 [28,29], we estimated that the average number of daily contacts (with 95% CI)  
182 decreased of around 40% in the US – from 5.58 (4.50, 6.67) on Friday in week 11 to 3.32 (2.53, 4.11) on  
183 Friday in week 12 – and of around 33% in the UK – from 5.84 (4.81, 6.87) to 3.93 (1.53, 6.33). On Friday  
184 in week 14, after the implementation of lockdown measures, contact numbers decreased even further in  
185 the UK to 2.95 (2.23, 3.67), but not in the US, where contact numbers had essentially plateaued since the  
186 beginning of week 13. In the other countries, where physical distancing guidelines were introduced before  
187 the beginning of our study, we found that the average number of contacts had already declined to their  
188 lowest levels in week 13, ranging on the Friday from 2.42 (2.03, 2.81) in France to 3.97 (3.49, 4.45) in  
189 Germany.

1  
2  
3 190 Reductions in social contacts differed between those countries that eventually applied a full  
4  
5 191 lockdown (people were required to stay at home and not allowed to go out if not necessary), such as  
6  
7 192 Belgium, France, Italy, Spain, and the UK, and those that opted for a partial lockdown (a stricter version  
8  
9 193 of the physical distancing guidelines was imposed, but people had the freedom to go out), such as  
10  
11 194 Germany and the Netherlands (Table 1). For the latter two countries, we estimated that each person had  
12  
13 195 more than four contacts per day in week 15, a substantially higher value than for countries with full  
14  
15 196 lockdown (up to three per day). The comparison between the pre-pandemic contact data [4,25] and those  
16  
17 197 in week 15 showed that the largest reduction had occurred in Italy, at 82%, though substantial declines  
18  
19 198 also occurred in the other countries, ranging from 49% in Germany to between 69% and 76% in Belgium,  
20  
21 199 France, the Netherlands, and the UK. Such decrease was rather uniform across age groups, with numbers  
22  
23 200 remaining higher for people aged 18-24 years, while those aged 65+ years usually reported the lowest  
24  
25 201 numbers from the beginning of the study period (Supplementary Fig. S6).  
26  
27  
28  
29  
30  
31  
32  
33  
34  
35  
36  
37  
38  
39  
40  
41  
42  
43  
44  
45  
46  
47  
48  
49  
50  
51  
52  
53  
54  
55  
56  
57  
58  
59  
60

202 **Table 1** Model-predicted mean number (with SE) of daily contacts per person compared with pre-pandemic model predictions, by country, setting,  
203 and week, March-April 2020.

| Country        | Setting           | Prior to COVID-19 |      | Week 11 (Mar 9 – 15) |      | Week 12 (Mar 16 – 22) |      | Week 13 (March 23 – 29) |      | Week 14 (Mar 30 - Apr 5) |      | Week 15 (Apr 6 – 12) |      |
|----------------|-------------------|-------------------|------|----------------------|------|-----------------------|------|-------------------------|------|--------------------------|------|----------------------|------|
|                |                   | Mean              | SE   | Mean                 | SE   | Mean                  | SE   | Mean                    | SE   | Mean                     | SE   | Mean                 | SE   |
| Belgium        | Work              | 3.2               | 0.41 |                      |      |                       |      |                         |      | 1.12                     | 0.15 | 1.34                 | 0.11 |
|                | General community | 5.33              | 0.29 |                      |      |                       |      |                         |      | 0.65                     | 0.05 | 0.73                 | 0.03 |
|                | Overall           | 11.76             | 0.48 |                      |      |                       |      |                         |      | 2.87                     | 0.16 | 3.07                 | 0.1  |
| France         | Work              | 2.37              | 0.12 |                      |      |                       |      | 0.71                    | 0.1  | 0.85                     | 0.1  | 0.83                 | 0.1  |
|                | General community | 4.59              | 0.13 |                      |      |                       |      | 0.44                    | 0.03 | 0.49                     | 0.03 | 0.47                 | 0.03 |
|                | Overall           | 10.3              | 0.21 |                      |      |                       |      | 2.29                    | 0.1  | 2.46                     | 0.11 | 2.48                 | 0.1  |
| Germany        | Work              | 1.83              | 0.17 |                      |      | 2.1                   | 0.18 | 1.77                    | 0.13 | 1.78                     | 0.09 | 1.77                 | 0.09 |
|                | General community | 2.98              | 0.14 |                      |      | 1.33                  | 0.07 | 1.02                    | 0.04 | 1                        | 0.03 | 1.18                 | 0.04 |
|                | Overall           | 8.03              | 0.27 |                      |      | 4.53                  | 0.21 | 4.02                    | 0.13 | 4.03                     | 0.11 | 4.09                 | 0.1  |
| Italy          | Work              | 5.72              | 0.62 | 1.16                 | 0.1  | 0.88                  | 0.17 | 0.68                    | 0.07 | 0.51                     | 0.07 | 1.13                 | 0.19 |
|                | General community | 7.93              | 0.36 | 0.62                 | 0.03 | 0.66                  | 0.06 | 0.44                    | 0.03 | 0.53                     | 0.04 | 0.66                 | 0.05 |
|                | Overall           | 18.22             | 0.61 | 3.29                 | 0.1  | 2.89                  | 0.13 | 2.57                    | 0.08 | 2.5                      | 0.1  | 3.02                 | 0.14 |
| Netherlands    | Work              | 5.83              | 1.31 |                      |      |                       |      |                         |      | 1.86                     | 0.14 | 2.2                  | 0.19 |
|                | General community | 7.13              | 0.76 |                      |      |                       |      |                         |      | 0.84                     | 0.04 | 1                    | 0.04 |
|                | Overall           | 15.03             | 1.2  |                      |      |                       |      |                         |      | 3.94                     | 0.14 | 4.31                 | 0.17 |
| Spain          | Work              |                   |      |                      |      | 0.86                  | 0.28 | 0.63                    | 0.09 | 0.87                     | 0.1  | 0.8                  | 0.08 |
|                | General community |                   |      |                      |      | 0.64                  | 0.15 | 0.5                     | 0.04 | 0.47                     | 0.03 | 0.5                  | 0.03 |
|                | Overall           |                   |      |                      |      | 2.58                  | 0.31 | 2.79                    | 0.12 | 2.66                     | 0.1  | 2.72                 | 0.09 |
| United Kingdom | Work              | 3.02              | 0.39 | 3.09                 | 0.32 | 2.5                   | 0.49 | 1.02                    | 0.1  | 0.62                     | 0.11 | 0.97                 | 0.17 |
|                | General community | 4.06              | 0.21 | 1.62                 | 0.09 | 1.05                  | 0.11 | 0.62                    | 0.03 | 0.48                     | 0.04 | 0.5                  | 0.04 |
|                | Overall           | 10.54             | 0.35 | 5.43                 | 0.29 | 4.64                  | 0.4  | 2.97                    | 0.1  | 2.39                     | 0.1  | 2.83                 | 0.14 |
| United States  | Work              |                   |      | 2.85                 | 0.2  | 1.93                  | 0.14 | 1.42                    | 0.1  | 1.23                     | 0.1  | 1.36                 | 0.11 |
|                | General community |                   |      | 1.54                 | 0.06 | 1.01                  | 0.04 | 0.76                    | 0.03 | 0.7                      | 0.03 | 0.75                 | 0.03 |
|                | Overall           |                   |      | 5.51                 | 0.23 | 4.49                  | 0.16 | 3.6                     | 0.11 | 3.46                     | 0.12 | 3.7                  | 0.11 |

204

1  
2  
3 205 Furthermore, we observed an increased use of face coverings in all countries, except for Belgium  
4  
5 206 and the Netherlands (stable at 10%) [14]. The largest increases were reported in Italy (from 40% in week  
6  
7 207 11 to 80% in week 15) and in the US (from 10% in week 11 to 60% in week 15), while in the UK it  
8  
9 208 reached 20% by the same date (Fig. 2). Between 80% and 90% of participants in every country avoided  
10  
11 209 social activities, with evidence of a sharp increase over time in the UK and, to a lesser extent, the US.  
12  
13 210 Little to no variation was instead observed for handwashing and the perceived threat.

14  
15  
16 211 Finally, the weekly estimates of the net reproduction number  $R_t^w$  generally decreased from the  
17  
18 212 baseline value of the basic reproduction number  $R_0$  under pre-COVID social mixing, albeit with large  
19  
20 213 heterogeneity among countries (Fig. 3). In Italy, Spain, France, and Belgium, the reduction in contact  
21  
22 214 numbers led to decreases between 70% and 80% of the baseline  $R_0$ , and hence to a  $R_t^w$  below one, as  
23  
24 215 early as in week 11, while in the UK, evidence of the  $R_t^w$  below one did not appear until week 14. In the  
25  
26 216 Netherlands and the US, the 95% CI of the  $R_t^w$  always included the value of one, following reductions of  
27  
28 217 around 60-70% in both contact numbers and  $R_t^w$ . In Germany, the decline in the overall contact numbers  
29  
30 218 led to a rather small decrease in the  $R_t^w$ , which reached its minimum value, 1.50 (0.88–2.13), in week 15.

31  
32  
33 219 Under the alternative threshold, we found that the higher number of contacts entailed lower  
34  
35 220 reductions in both social contacts and in the  $R_t^w$ , which was below one for Italy and Spain, and equal to  
36  
37 221 one for Belgium, France, Netherlands, and, from week 13, the UK and the US (Supplementary Fig. S13).

38  
39  
40 222

## 41 223 **DISCUSSION**

42  
43  
44 224 This paper provided comparative estimates of the daily number of social contacts, overall and by setting  
45  
46 225 of contact, that people had during the early phase of the COVID-19 pandemic, between March 12 (week  
47  
48 226 11) and April 12 (week 15), in Belgium, France, Germany, Italy, the Netherlands, Spain, the UK, and the  
49  
50 227 US, disaggregated by week. Compared to the pre-COVID period, overall contact numbers had  
51  
52 228 substantively decreased, although not uniformly across all countries. Reductions were smaller than the  
53  
54 229 86% observed in Wuhan (China) in February 2020 [5], as they ranged from 49% in Germany to 83% in

1  
2  
3 230 Italy. Our estimates were consistent with those from other independent studies conducted at the same time  
4  
5 231 in Europe and the US [6–10,13]. The unique aspect of our study is that it is the only one to use a  
6  
7 232 consistent approach to collect comparative data across several countries and on a daily basis over an  
8  
9 233 extended period of time.

11 234 Our findings suggest that the countries with the highest numbers of social contacts were those  
12  
13 235 that implemented only partial lockdowns (or stricter versions of the physical distancing guidelines),  
14  
15 236 whereas the countries that implemented full lockdowns experienced much lower contact numbers.  
16  
17 237 Evidence from the UK and the US showed that the numbers of contacts declined sharply after  
18  
19 238 governments issued physical distancing guidelines, even before the introduction of lockdown measures.  
20  
21 239 This pattern was also observed based on mobile phone data made available by Google, illustrating the  
22  
23 240 change in human mobility compared to January and February 2020 [30,31].

26 241 We estimated the impact of reductions in social contacts on the weekly net reproduction number  
27  
28 242  $R_t^w$ . An 80% reduction in contacts was associated with an equivalent reduction in the  $R_t^w$ , which was  
29  
30 243 compatible with values below one in Italy, Spain, France, Belgium, and the UK, and equal to one in the  
31  
32 244 Netherlands and the US. The exception was Germany, where the  $R_t^w$  estimate was always above one.  
33  
34 245 Indeed, independent estimates of  $R_t$  at the beginning of April in Germany, i.e., 1.1 with 95% CI 0.9–1.4,  
35  
36 246 were consistent with those presented in this paper [32,33]. These findings can be explained by the  
37  
38 247 relatively low social contact numbers in Germany during the pre-COVID period (eight contacts per day,  
39  
40 248 on average) and the smaller reductions in social contact numbers during the study period (between 40%  
41  
42 249 and 50%). Nonetheless, these results should not be interpreted as evidence that the infection spread was  
43  
44 250 exceptionally high in Germany despite physical distancing interventions. Changes in the  $R_t$  are brought  
45  
46 251 about not only by changes in social contact patterns, but also in infection transmissibility, which might be  
47  
48 252 affected by several additional factors, such as travel restrictions, keeping the distance between people  
49  
50 253 while having conversations in public spaces, increased hand washing or sanitizing, and the use of face  
51  
52 254 masks [29,34,35], which could be considered only partially in our calculations.  
53  
54  
55  
56  
57  
58  
59  
60

1  
2  
3 255 The study has limitations that should be considered when interpreting our findings. First, we  
4  
5 256 collected data using an opt-in sample of Facebook users. Such non-probabilistic samples are somewhat  
6  
7 257 less accurate than probability samples in obtaining statistics that are representative for the general  
8  
9 258 population, but with the appropriate statistical adjustments, such as those we made, they offer a good  
10  
11 259 approximation to results that could be obtained from probabilistic samples. Furthermore, opt-in Facebook  
12  
13 260 samples can be collected rapidly and therefore offer data that would be difficult to collected otherwise  
14  
15 261 during a pandemic. Indeed, to the best of our knowledge, our study is the only cross-country survey on  
16  
17 262 social contacts that exists for the unique period of time considered. Finally, our data cover a large  
18  
19 263 population at minimal costs compared to more traditional surveys [15].  
20  
21

22 264 Second, our approach of recruiting survey respondents through targeted online advertisements  
23  
24 265 may aggravate issues of self-selection bias. Indeed, our participants might differ to some extent from the  
25  
26 266 general population in terms of their sociability patterns (due to their Facebook use) and their concerns  
27  
28 267 about health-related issues (as they opted in to participate in the survey). We tackled this issue by  
29  
30 268 stratifying our advertising campaigns and applying post-stratification weights using factors that we  
31  
32 269 believe are linked to both survey participation and the outcomes of interest [36,37], and ensuring that only  
33  
34 270 respondents who were shown the Facebook advertisement and clicked on the link could participate in the  
35  
36 271 study (thereby avoiding spill over biases in the sample that we cannot adjust for). However, post-  
37  
38 272 stratification weights cannot correct entirely for different behaviours or social inequalities (e.g., education  
39  
40 273 level or ethnicity) among Facebook users since such variables cannot be included in the marketing  
41  
42 274 campaign stratification.  
43  
44

45 275 Third, several survey participants reported extremely high contact numbers, perhaps because they  
46  
47 276 had little motivation to provide accurate counts. This is a general problem in social contact surveys.  
48  
49 277 Typically, social contact surveys either include a maximum number of contacts that respondents can  
50  
51 278 report, or researchers assess ex-post the threshold level for the right tail of the contact distribution of  
52  
53 279 contacts. We followed the latter approach and removed respondents reporting implausible values.  
54  
55 280 However, we also found that our results are robust to a choice of cut-off values consistent with those used  
56  
57  
58  
59  
60



281 in standard surveys in the field. Future contact surveys may consider including attention checks items to  
282 reduce potential issues with outliers.

283 In conclusion, we provided an international comparable set of statistics on social contact patterns  
284 during the COVID-19 pandemic, disaggregated by country, setting, and week (Supplementary Data file  
285 1). As these estimates offer a more grounded alternative to the theoretical assumptions that have so far  
286 been used [34,38,39], we believe that the scientific community can draw on this information for  
287 developing more realistic epidemic models of COVID-19.

288

## 289 REFERENCES

- 290 1 Morawska L, Milton DK. It Is Time to Address Airborne Transmission of Coronavirus Disease 2019  
291 (COVID-19). *Clin Infect Dis* 2020;**71**:2311–3. doi:10.1093/cid/ciaa939
- 292 2 The Lancet Respiratory Medicine. COVID-19 transmission—up in the air. *Lancet Respir Med*  
293 2020;**8**:1159. doi:10.1016/S2213-2600(20)30514-2
- 294 3 Wallinga J, Teunis P, Kretzschmar M. Using Data on Social Contacts to Estimate Age-specific  
295 Transmission Parameters for Respiratory-spread Infectious Agents. *Am J Epidemiol* 2006;**164**:936–  
296 44. doi:10.1093/aje/kwj317
- 297 4 Mossong J, Hens N, Jit M, *et al*. Social Contacts and Mixing Patterns Relevant to the Spread of  
298 Infectious Diseases. *PLoS Med* 2008;**5**:e74. doi:10.1371/journal.pmed.0050074
- 299 5 Zhang J, Litvinova M, Liang Y, *et al*. Changes in contact patterns shape the dynamics of the COVID-  
300 19 outbreak in China. *Science* 2020;**368**:1481–6. doi:10.1126/science.abb8001
- 301 6 Backer JA, Mollema L, Vos ERA, *et al*. The impact of physical distancing measures against COVID-  
302 19 transmission on contacts and mixing patterns in the Netherlands: repeated cross-sectional surveys  
303 in 2016/2017, April 2020 and June 2020. *medRxiv* 2020;:2020.05.18.20101501.  
304 doi:10.1101/2020.05.18.20101501
- 305 7 Coletti P, Wambua J, Gimma A, *et al*. CoMix: comparing mixing patterns in the Belgian population  
306 during and after lockdown. *Sci Rep* 2020;**10**:21885. doi:10.1038/s41598-020-78540-7
- 307 8 Jarvis CI, Van Zandvoort K, Gimma A, *et al*. Quantifying the impact of physical distance measures  
308 on the transmission of COVID-19 in the UK. *BMC Med* 2020;**18**:124. doi:10.1186/s12916-020-  
309 01597-8
- 310 9 Latsuzbaia A, Herold M, Bertemes J-P, *et al*. Evolving social contact patterns during the COVID-19  
311 crisis in Luxembourg. *PLoS ONE* 2020;**15**:e0237128. doi:10.1371/journal.pone.0237128
- 312 10 Sypsa V, Roussos S, Paraskevis D, *et al*. Effects of Social Distancing Measures during the First  
313 Epidemic Wave of Severe Acute Respiratory Syndrome Infection, Greece - Volume 27, Number 2—

- 1  
2  
3 314 February 2021 - Emerging Infectious Diseases journal - CDC. *Emerg Infect Dis* 2021;**27**:452–62.  
4 315 doi:10.3201/eid2702.203412  
5
- 6 316 11 Quaife M, van Zandvoort K, Gimma A, *et al.* The impact of COVID-19 control measures on social  
7 317 contacts and transmission in Kenyan informal settlements. *BMC Med* 2020;**18**:316.  
8 318 doi:10.1186/s12916-020-01779-4  
9
- 10 319 12 Dorélien AM, Simon A, Hagge S, *et al.* Minnesota Social Contacts and Mixing Patterns Survey with  
11 320 Implications for Modelling of Infectious Disease Transmission and Control. *Surv Pract*  
12 321 2020;**13**:13669. doi:10.29115/SP-2020-0007  
13
- 14 322 13 Feehan DM, Mahmud AS. Quantifying population contact patterns in the United States during the  
15 323 COVID-19 pandemic. *Nat Commun* 2021;**12**:893. doi:10.1038/s41467-021-20990-2  
16
- 17 324 14 Perrotta D, Grow A, Rampazzo F, *et al.* Behaviors and attitudes in response to the COVID-19  
18 325 pandemic: Insights from a cross-national Facebook survey. *medRxiv* 2020;:2020.05.09.20096388.  
19 326 doi:10.1101/2020.05.09.20096388  
20
- 21 327 15 Grow A, Perrotta D, Fava ED, *et al.* Addressing Public Health Emergencies via Facebook Surveys:  
22 328 Advantages, Challenges, and Practical Considerations. *J Med Internet Res* 2020;**22**:e20653.  
23 329 doi:10.2196/20653  
24
- 25 330 16 Pöttschke S, Braun M. Migrant Sampling Using Facebook Advertisements: A Case Study of Polish  
26 331 Migrants in Four European Countries. *Soc Sci Comput Rev* 2016;**35**:633–53.  
27 332 doi:10.1177/0894439316666262  
28
- 29 333 17 Zhang B, Mildenerger M, Howe PD, *et al.* Quota sampling using Facebook advertisements. *Polit Sci*  
30 334 *Res Methods* 2018;:1–7. doi:10.1017/psrm.2018.49  
31
- 32 335 18 Eurostat. *Eurostat regional yearbook: 2019 edition*. 2019.  
33 336 [http://publications.europa.eu/publication/manifestation\\_identifier/PUB\\_KSHA19001ENN](http://publications.europa.eu/publication/manifestation_identifier/PUB_KSHA19001ENN) (accessed  
34 337 15 May 2020).  
35
- 36 338 19 US Census Bureau. 2018 Population Estimates by Age, Sex, Race and Hispanic Origin. U. S. Census  
37 339 Bur. <https://www.census.gov/newsroom/press-kits/2019/detailed-estimates.html> (accessed 15 May  
38 340 2020).  
39
- 40 341 20 Teslya A, Pham TM, Godijk NG, *et al.* Impact of self-imposed prevention measures and short-term  
41 342 government-imposed social distancing on mitigating and delaying a COVID-19 epidemic: A  
42 343 modelling study. *PLoS Med* 2020;**17**:e1003166. doi:10.1371/journal.pmed.1003166  
43
- 44 344 21 Hens N, Ayele GM, Goeyvaerts N, *et al.* Estimating the impact of school closure on social mixing  
45 345 behaviour and the transmission of close contact infections in eight European countries. *BMC Infect*  
46 346 *Dis* 2009;**9**:187. doi:10.1186/1471-2334-9-187  
47
- 48 347 22 Liu Q-H, Ajelli M, Aleta A, *et al.* Measurability of the epidemic reproduction number in data-driven  
49 348 contact networks. *Proc Natl Acad Sci* 2018;**115**:12680–5. doi:10.1073/pnas.1811115115  
50
- 51 349 23 The Royal Society. Reproduction number (R) and growth rate (r) of the COVID-19 epidemic in the  
52 350 UK. 2020. <https://royalsociety.org/news/2020/09/set-c-covid-r-rate/>  
53  
54  
55  
56  
57  
58  
59  
60

- 1  
2  
3 351 24 Zhang J, Litvinova M, Wang W, *et al.* Evolving epidemiology and transmission dynamics of  
4 352 coronavirus disease 2019 outside Hubei province, China: a descriptive and modelling study. *Lancet*  
5 353 *Infect Dis* 2020;**20**:793–802. doi:10.1016/S1473-3099(20)30230-9  
6  
7 354 25 Béraud G, Kazmierczak S, Beutels P, *et al.* The French Connection: The First Large Population-  
8 355 Based Contact Survey in France Relevant for the Spread of Infectious Diseases. *PLoS ONE*  
9 356 2015;**10**:e0133203. doi:10.1371/journal.pone.0133203  
10  
11 357 26 Arregui S, Aleta A, Sanz J, *et al.* Projecting social contact matrices to different demographic  
12 358 structures. *PLoS Comput Biol* 2018;**14**:e1006638. doi:10.1371/journal.pcbi.1006638  
13  
14 359 27 Anderson RM, Heesterbeek H, Klinkenberg D, *et al.* How will country-based mitigation measures  
15 360 influence the course of the COVID-19 epidemic? *The Lancet* 2020;**395**:931–4. doi:10.1016/S0140-  
16 361 6736(20)30567-5  
17  
18 362 28 Mervosh S, Lu D, Swales V. See Which States and Cities Have Told Residents to Stay at Home. N.  
19 363 Y. Times. 2020.<https://www.nytimes.com/interactive/2020/us/coronavirus-stay-at-home-order.html>  
20 364 (accessed 25 Sep 2020).  
21  
22 365 29 Flaxman S, Mishra S, Gandy A, *et al.* Estimating the effects of non-pharmaceutical interventions on  
23 366 COVID-19 in Europe. *Nature* 2020;**584**:257–61. doi:10.1038/s41586-020-2405-7  
24  
25 367 30 Google LLC. Google COVID-19 Community Mobility Reports.  
26 368 <https://www.google.com/covid19/mobility/> (accessed 22 Jun 2020).  
27  
28 369 31 Basellini U, Alburez-Gutierrez D, Del Fava E, *et al.* Linking excess mortality to Google mobility data  
29 370 during the COVID-19 pandemic in England and Wales. *SocArXiv* Published Online First: 7 July  
30 371 2020. doi:10.31235/osf.io/75d6m  
31  
32 372 32 RKI. RKI - Coronavirus SARS-CoV-2 - Situation report - 9 Apr 2020. Robert Koch Institute 2020.  
33 373 [https://www.rki.de/DE/Content/InfAZ/N/Neuartiges\\_Coronavirus/Situationsberichte/2020-04-09-](https://www.rki.de/DE/Content/InfAZ/N/Neuartiges_Coronavirus/Situationsberichte/2020-04-09-en.pdf?__blob=publicationFile)  
34 374 [en.pdf?\\_\\_blob=publicationFile](https://www.rki.de/DE/Content/InfAZ/N/Neuartiges_Coronavirus/Situationsberichte/2020-04-09-en.pdf?__blob=publicationFile), (accessed 15 May 2020).  
35  
36 375 33 Barbarossa MV, Fuhrmann J, Meinke JH, *et al.* Modeling the spread of COVID-19 in Germany:  
37 376 Early assessment and possible scenarios. *PLoS ONE* 2020;**15**:e0238559.  
38 377 doi:10.1371/journal.pone.0238559  
39  
40 378 34 Dehning J, Zierenberg J, Spitzner FP, *et al.* Inferring change points in the spread of COVID-19  
41 379 reveals the effectiveness of interventions. *Science* 2020;**369**. doi:10.1126/science.abb9789  
42  
43 380 35 Chinazzi M, Davis JT, Ajelli M, *et al.* The effect of travel restrictions on the spread of the 2019 novel  
44 381 coronavirus (COVID-19) outbreak. *Science* Published Online First: 6 March 2020.  
45 382 doi:10.1126/science.aba9757  
46  
47 383 36 Keiding N, Louis TA. Perils and potentials of self-selected entry to epidemiological studies and  
48 384 surveys. *J R Stat Soc Ser A Stat Soc* 2016;**179**:319–76. doi:10.1111/rssa.12136  
49  
50 385 37 Mercer AW, Kreuter F, Keeter S, *et al.* Theory and Practice in Nonprobability Surveys Parallels  
51 386 between Causal Inference and Survey Inference. *Public Opin Q* 2017;**81**:250–71.  
52 387 doi:10.1093/poq/nfw060  
53  
54  
55  
56  
57  
58  
59  
60

388 38 Gatto M, Bertuzzo E, Mari L, *et al.* Spread and dynamics of the COVID-19 epidemic in Italy: Effects  
389 of emergency containment measures. *Proc Natl Acad Sci* 2020;**117**:10484–91.  
390 doi:10.1073/pnas.2004978117

391 39 Salje H, Kiem CT, Lefrancq N, *et al.* Estimating the burden of SARS-CoV-2 in France. *Science*  
392 2020;**369**:208–11. doi:10.1126/science.abc3517

393

## 394 STATEMENTS

### 395 Author Contributions

396 Conceptualization: EDF, EZ; Data Curation: AG, JC; Formal analysis and investigation: EDF, JC; Project

397 Administration: DP, AG; Writing - original draft preparation: [EDF, JC, EZ]; Writing - review and

398 editing: [EDF, JC, DP, AG, FR, SGC, EZ]; Funding acquisition: EZ; Resources: DP, AG, FR, SGC;

399 Supervision: EZ.

### 400 Competing interests

401 None declared.

### 402 Funding

403 This study was funded with support from the Max Planck Institute for Demographic Research, which is

404 part of the Max Planck Society.

### 405 Data sharing

406 The aggregated contact data that underlie the analyses reported here are provided as weighted average

407 (and relative standard error) by threshold, country, region, calendar week, setting of contact, sex, and age

408 group in the Supplementary Data (with details on the variables in the Supplementary Data Dictionary).

### 409 Ethics approval and consent to participate

410 Ethical approval for the study was obtained from the Ethics Council of the Max Planck Society

411 (Application No: 2020\_07). Participation in this study was voluntary, anonymous, and open to people

412 who were at least 18 years old. Electronic informed consent was obtained from all participants who

413 actively opted in to participate in the online survey, enabling the collection, storage and processing of

414 their answers.

## 415 **Acknowledgements**

416 We thank all the participants who took the time to voluntarily complete our survey; the staff at the Max  
417 Planck Institute for Demographic Research who contributed to the realization of this project, including  
418 the administrative department, the IT department, and the press department; and all our colleagues who  
419 took the time to review the translation and the implementation of the survey (Maarten J. Bijlsma, Mathias  
420 Lerch, Marília R. Nepomuceno, Tom Theile, Nicolas Todd, Joshua Wilde).

## 421 **Figure legends**

422 **Fig. 1** Mean overall number of daily social contacts (with 95% CI) smoothed by a simple two-day  
423 moving average, by country and study day, March-April 2020. The dotted line corresponds to the date in  
424 which the physical distancing guidelines were introduced at the national level; the dashed line  
425 corresponds to the date in which the lockdown, regardless of being full or partial, was ordered.

426 **Fig. 2** Prevalence of participants' uptake of different behavioural measures to protect themselves from the  
427 coronavirus and feeling of threat (averaging the feeling of threat to oneself with that to the family, after  
428 rescaling to a 0-100 scale), by country and week.

429 **Fig. 3** Absolute change in the weekly net reproduction number  $R_t^w$  with respect to the basic reproduction  
430 number  $R_0$  at baseline (A) and percent reduction with respect to  $R_0$  (B), by country and week. The 95%  
431 CIs are based on 5,000 replicates.

Type Overall Home Work General community

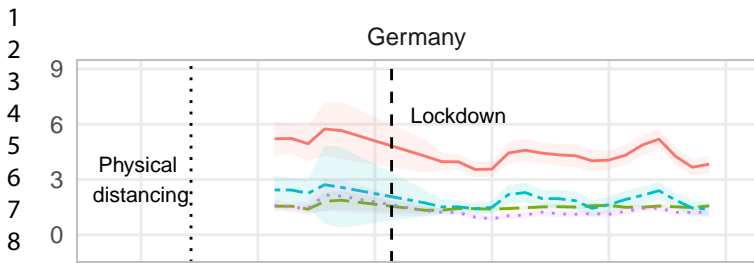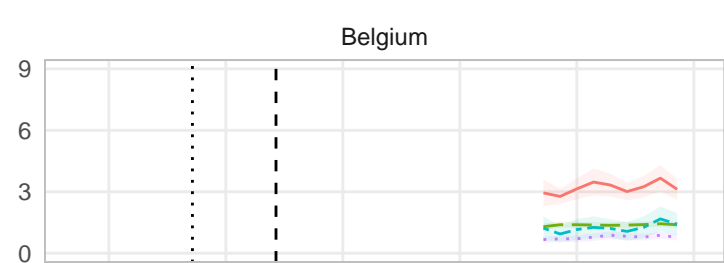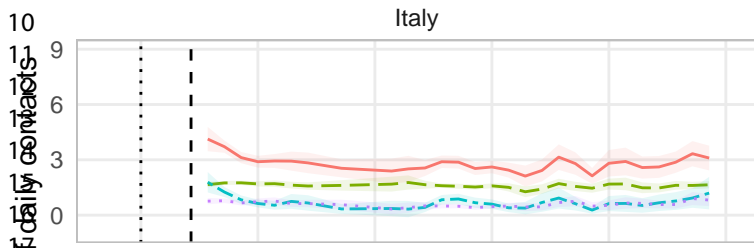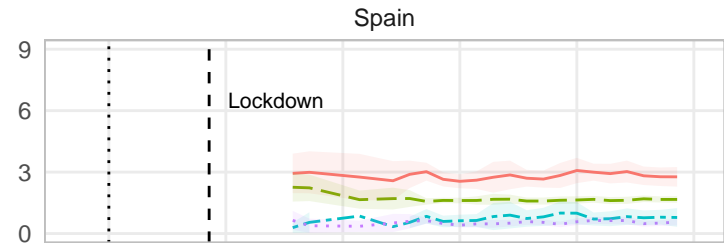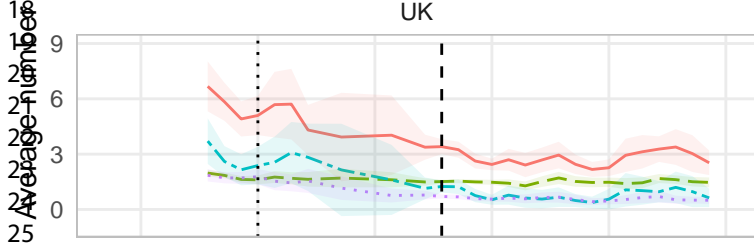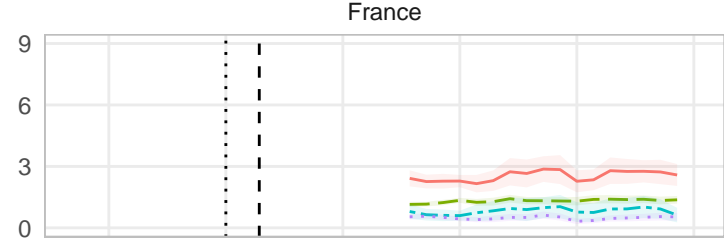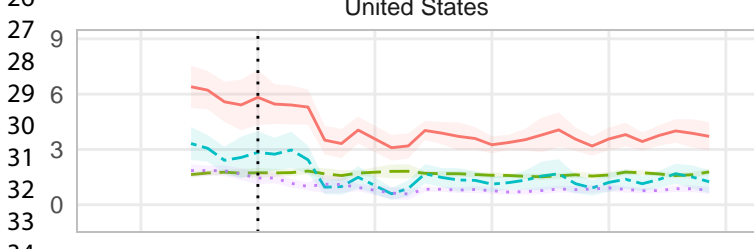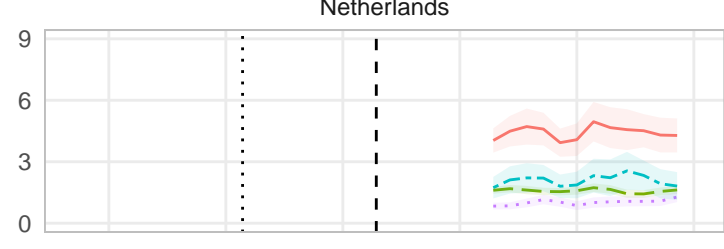

Mar 09 (W11) Mar 16 (W12) Mar 23 (W13) Mar 30 (W14) Apr 06 (W15) Apr 13 (W16)

Mar 09 (W11) Mar 16 (W12) Mar 23 (W13) Mar 30 (W14) Apr 06 (W15) Apr 13 (W16)

Date of contacts

Date of contacts

38

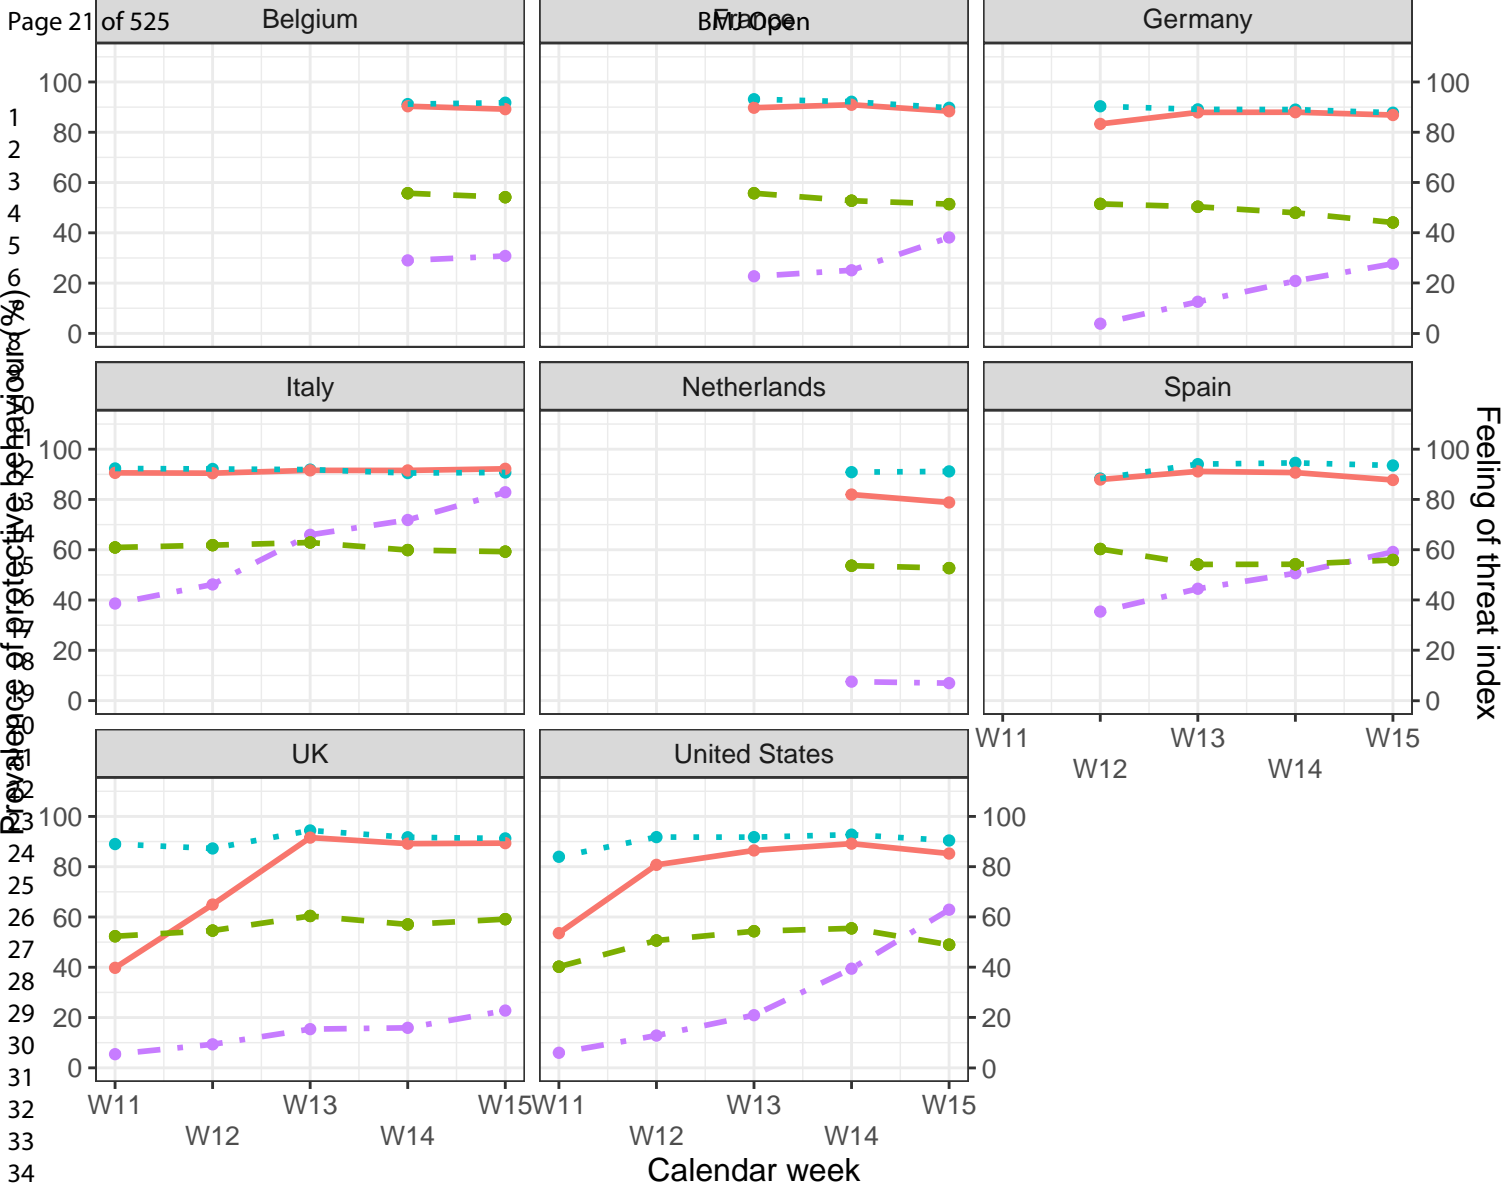

1  
2  
3  
4  
5  
6  
7  
8  
9  
10  
11  
12  
13  
14  
15  
16  
17  
18  
19  
20  
21  
22  
23  
24  
25  
26  
27  
28  
29  
30  
31  
32  
33  
34  
35  
36  
37  
38

Protective behaviour & feeling of threat

- Avoiding social activities
- - -●- - - Washing the hands more often
- - -●- - - Feeling of threat
- · - · -●- · - · - Wearing a face mask

(A)

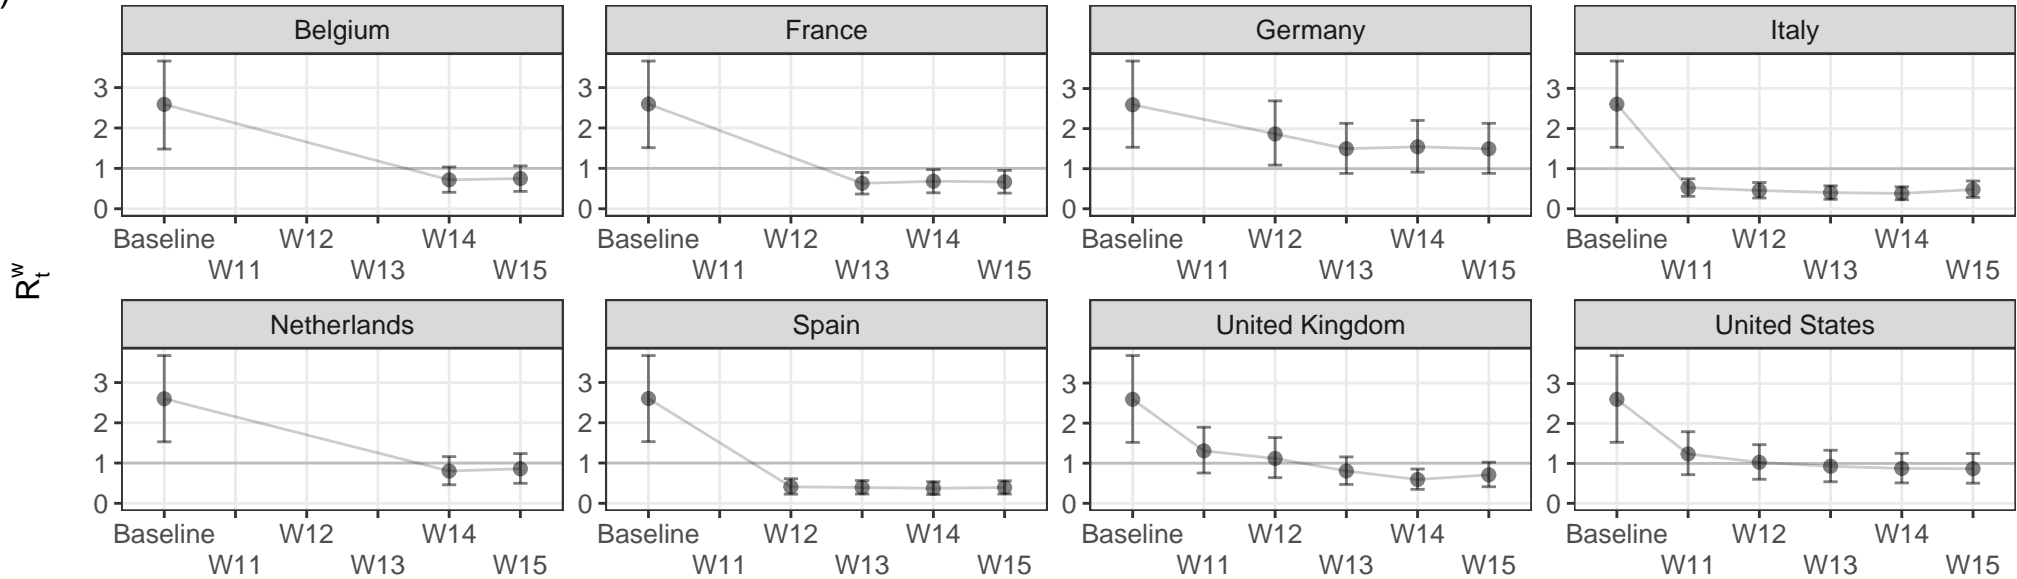

(B)

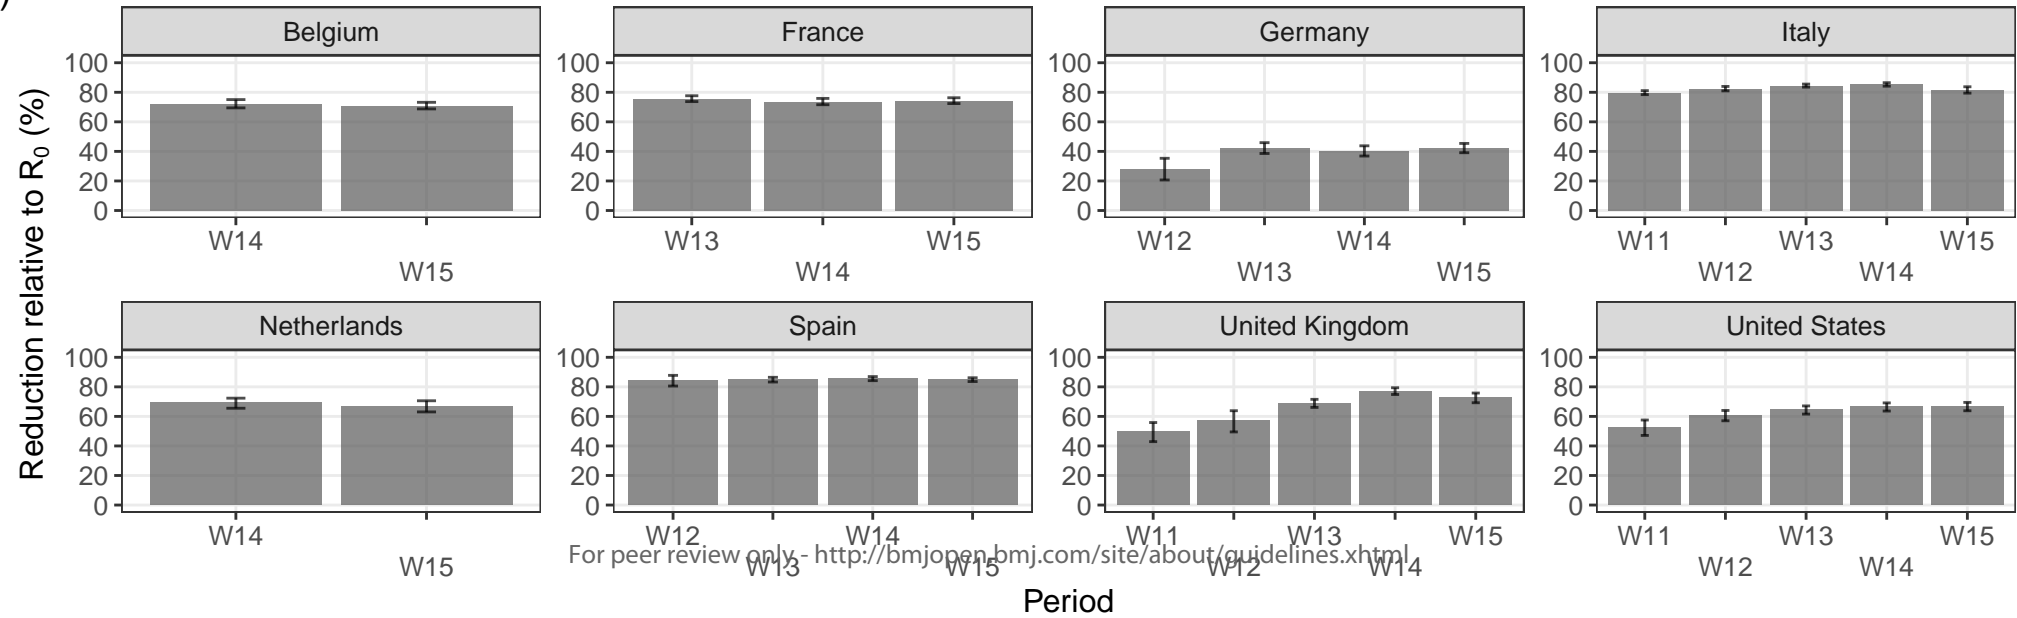

Period



## Supplementary Material

### The differential impact of physical distancing strategies on social contacts relevant for the spread of SARS-CoV-2: Evidence from the Covid-19 Health Behaviour Survey

#### Additional methods

##### Survey design

The data used in the analysis came from the CHBS, an online survey carried out in multiple countries (and multiple languages) to collect key information about people's health and behavior in a time of growing uncertainty due to the COVID-19 pandemic [1]. Participation was voluntary and anonymous, and open to people who were at least 18 years old. Recruitment occurred through targeted advertisements implemented through the Facebook Ads Manager (FAM), which is a tool that can be used to quickly reach large numbers of survey participants across several countries. The online survey was stratified by age groups, sex, and region of residence (largely following the NUTS-1 classification in Europe and the census regions in the United States, both aggregated into larger macro-regions) using the FAM to ensure that a minimum number of respondents was reached in all strata.

The questionnaire was divided into multiple sections covering different areas of interest: socio-demographic indicators (age, gender, country of birth, region of residence, level of education, and household size); health indicators (symptoms experienced in the previous seven days, among others); opinions and behaviours' (preventive measures taken and disruption to daily routine, among others); and social contact data. For the purposes of validation and comparability, the questionnaire included standard questions taken from relevant sources, such as the European Social Survey for socio-demographic questions [2], and an Ipsos poll for questions related to public opinion on the COVID-19 outbreak [3].

Informed consent was obtained from all participants, who had to be 18 years or older, enabling the collection, storage, and processing of their answers. Participants' data was treated anonymously. Ethical approval for the study was obtained from the Ethics Council of the Max Planck Society.

##### Recruitment Strategy

Marketers use the FAM to advertise their products or businesses. The FAM enables advertisers to create advertising campaigns that can have various goals, such as creating salience for a given service or product among Facebook users, or generating traffic to an external website. Following previous examples of Facebook surveys [4–6], we used the FAM to run campaigns to recruit respondents for our study. The countries included in the study, selected because of the number of COVID-19 cases they were experiencing, were Germany, Italy, Spain, the UK, the US, France, Belgium, and the Netherlands. The

1  
2  
3 FAM allowed us to perform a quota sampling by targeting user groups based on demographic  
4 characteristics, such as sex, age, and region of residence. In this way, not only we could ensure a minimum  
5 number of participants in each combination of strata, but we were also able to control for variables  
6 possibly associated with both survey participation and the survey outcomes [7,8].  
7

8  
9 At the beginning of March, prior to the start of the actual survey, we carried out separate pilots in  
10 Italy, the UK, and the US to test the FAM and the performance of our ads, allowing the study to officially  
11 begin on March 13. Figure S1 shows the question that prompted survey participants to report the  
12 information on their social contacts in the English-language version of the questionnaire.  
13

14  
15 Due to technical problems on the Facebook platform for some countries, very few respondents  
16 accessed the survey on certain days between March 20 and March 25. We thus excluded from the analysis  
17 those days with less than ten respondents. Although this issue might have increased the uncertainty in the  
18 model predictions (especially the daily ones), we believe that the analysis by week is robust and less  
19 affected by this issue.  
20  
21  
22  
23  
24

### 25 **Poststratification**

26 Since online surveys are not random samples of the population, we adjusted our survey data using a  
27 poststratification weighting approach. In particular, given that our aim was to achieve a nationally  
28 representative sample, we stratified the survey by age group, sex, and region of residence, which are all  
29 important variables that are related to differences in people's responses to the pandemic, as well as to  
30 survey participation. In order to create poststratification weights, we divided the true population  
31 proportion in each stratum, obtained from nationally representative data available through Eurostat (2019)  
32 [2] and the US census (2018) [9], by the sample proportion from the same stratum in our survey. These  
33 poststratification weights were used in all the statistical analyses presented in this paper.  
34  
35  
36  
37  
38  
39  
40

### 41 **Social contact data**

42 We defined social contacts, which are the focus of this paper, as any interaction involving either physical  
43 contact (such as a handshake or a hug) or a conversation of three or more words in the physical presence  
44 of another person. This definition is consistent with the definition employed in past social contact surveys,  
45 which we used as the baseline for comparison in this work [10,11]. In more detail, we asked respondents  
46 to report the number of individuals with whom they interacted on the day before the survey in different  
47 settings: i.e., at home, at school or college, at work, and in the general community (such as during  
48 commuting or leisure activities); while making it clear that the respondent should not report multiple  
49 interactions with the same person in different settings. However, unlike previous contact surveys, we did  
50 not ask about the characteristics of the contacted individuals (e.g., age and sex) to avoid overburdening  
51  
52  
53  
54  
55  
56  
57  
58  
59  
60

respondents, given the nature of the online survey. The text describing the social contact question is shown in Figure S1.

### Health behaviours and perceived risk

We asked respondents to rate the level of perceived threat they thought the COVID-19 posed to different levels of society, namely, (i) to themselves, (ii) to their family, (iii) to their local community, (iv) to their country, and (v) to the world, using a 5-point Likert scale. For the sake of our analysis, we rescaled participants' responses to the range 0 – 1, where zero indicated “very low threat” and one “very high threat”. To account for a feeling of threat that might have affected social contact patterns of respondents, we combined in one variable the perceived level of threat to themselves and to their families, taking their simple mean. These two indicators were found to have a good internal consistency, having a Cronbach's alpha of 0.84.

Moreover, we asked respondents which health behaviours, in the form of specific actions, they took up to protect themselves from the virus. Among the listed actions, coded as dummy variables, we asked whether respondents avoided shaking hands, social activities (e.g., meeting friends), crowded places (e.g., restaurants, cinemas, gym, or playground), travelling by public transportation (e.g., by bus, tram, subway, or train) or by taxi, whether they stockpiled medicines or food, whether they used a face mask, and whether they washed their hands or used a sanitizing hand gel more often. For our analysis, we picked three of these actions, which might have an impact on the transmissibility of the virus, namely, avoiding social activities, wearing a face mask, and washing the hands more often [12,13].

### Epidemiological analysis

The net reproduction number  $R_t$  can be estimated as the dominant eigenvalue, denoted as  $\rho$ , of the next generation matrix  $\mathbf{N}$ , i.e.,  $R_t = \rho(\mathbf{N})$ , where  $\mathbf{N}$  provides information on the numbers of newly infected individuals by age group at a given time [14]. Under the “social contact hypothesis”,  $\mathbf{N} = Dq\mathbf{C}$ , where  $\mathbf{C}$  is the matrix containing the average number of contacts between age groups,  $q$  is the disease transmissibility parameter, and  $D$  is the length of the infectiousness period [15]. We use the proportional relationship between  $\mathbf{N}$  and  $\mathbf{C}$ , i.e.,  $\mathbf{N} = \frac{R_t}{\rho(\mathbf{C})}\mathbf{C}$ , to assess changes in  $R_t$  due to changes in social contact numbers [16–19].

As we did not collect information on the age of the individuals encountered by the study participants, we derived the contact matrices  $\mathbf{C}$  for each study week using the following procedure: (i) for each country, based on the data collected in the POLYMOD study between 2005 and 2006 [10], and in the Comes-F studies in 2012 [11], we constructed pre-COVID age-specific social contact matrices  $\mathbf{C}^{pre}$ , using

1  
2  
3 the same age groups of the survey (18 – 24 years, 25 – 44 years, 45 – 64 years, and 65 years or more),  
4 which contained the average number of contacts between participants in the  $i$ th age group and their  
5 contactees in the  $j$ th age group; (ii) we projected the matrices  $\mathbf{C}^{pre}$  to the population structure of each  
6 country in 2020 [20]; (ii) to remove differences in the contact levels between countries, we normalized  
7 each matrix  $\mathbf{C}^{pre}$  to the average number of contacts at the population level, so that the mean number of  
8 contacts of the matrix  $\mathbf{C}^{pre + norm}$  was equal to one; (iii) we multiplied the normalized matrix  $\mathbf{C}^{pre + norm}$   
9 by the average number of daily contacts that we predicted for each group and study week, thus obtaining  
10 the weekly COVID matrices  $\mathbf{C}_w^{cov}$ .  
11  
12  
13  
14  
15

16 As we did not collect data for people younger than 18 years old, we computed their average  
17 number of daily contacts per week in the following way. To reflect school closure during the survey  
18 period, we excluded school contacts from the contact data prior to COVID-19, considering only the  
19 overlapping age groups between the two types of matrices. Then, for each country, we computed a weekly  
20 overall scaling factor, and we obtained the average number of contacts for individuals aged less than 18 by  
21 multiplying their average number of pre-COVID-19 contacts in the population for such factor.  
22  
23  
24

25 To account for the uncertainty in the pre-COVID contact data, we applied a non-parametric  
26 bootstrap procedure to the original data, resampling with replacement the participants, proportionally to  
27 the population age distribution, and assigning them to their original contact data.  
28  
29  
30  
31  
32  
33  
34  
35  
36  
37  
38  
39  
40  
41  
42  
43  
44  
45  
46  
47  
48  
49  
50  
51  
52  
53  
54  
55  
56  
57  
58  
59  
60

As a last request, we would like you to record the number of persons you had **contact with yesterday** in different locations (at home, at school/college, at work, other locations), from when you woke up to when you went to sleep.

- A contact is defined as:
  - EITHER a **two-way conversation** with three or more words in the physical presence of another person,
  - OR physical **skin-to-skin contact** (for example a handshake, hug, kiss or contact sports).
- Think about every person that you contacted during the day, regardless of whether the contact was long or short, and whether you knew the person or not.
- Contacts made exclusively by telephone or mobile phone should NOT be recorded.
- If you contacted the same person in different locations in the course of the day, only count him/her once, and assign him/her to the location where you two had the contact of longer duration.
  - **Example:** Anne runs a family business together with her husband Tom. Anne and Tom saw each other yesterday both at home and at work. Since they spent more time together at home than at work, Anne will count the contact with Tom as a home contact, and not a work contact.
- If you had no contacts in a given location, please enter 0.

How many persons did you have contacts with yesterday ...

\*... at home?

- Number of people:
- Prefer not to answer

\*... at school/college?

- Number of people:
- Not applicable (e.g. you do not attend any school)
- Prefer not to answer

\*... at work?

(at your workplace or throughout the course of your daily job activity, such as meeting customers or clients)

- Number of people:
- Not applicable (e.g. you do not work)
- Prefer not to answer

\*... in other settings?

(e.g. during transportation and commuting, social and leisure activities, religious services, shopping, or other activities)

- Number of people:
- Prefer not to answer

Figure S1. CHBS questions on daily social contacts.

## Additional results

### Comparison between the raw and the weighted samples

In Tables S1-S8, for each country, we describe participants in terms of the variables used for the stratification and the construction of the Facebook advertising campaigns, comparing the unweighted sample to the weighted sample, and to the overall population.

We found that, in all countries, women were overrepresented in the sample. Moreover, respondents were more uniformly spread across regions than in the real population. Finally, no trend in terms of age was found when comparing the raw and the adjusted sample distributions. We also noted that the unweighted sample size for the 65+ age group (who are at higher risk of death from COVID-19 [21], and who usually have lower social media participation rates [22]) was fairly large, with the Netherlands, UK, and the US showing higher percentages than in the population.

**Table S1.** Characteristics of survey participants in Belgium (N=3756), by region of residence, age group, and sex. We compare the raw sample (“unweighted”) to the sample adjusted with the post-stratification weights (“weighted”), and to the distribution of each stratum in the population.

| Variable         | Category        | Unweighted |       | Weighted |       | Population |
|------------------|-----------------|------------|-------|----------|-------|------------|
|                  |                 | N          | %     | N        | %     | %          |
| <b>Region</b>    | <b>Brussels</b> | 685        | 18.2% | 376      | 10.0% | 10.3%      |
|                  | <b>Flanders</b> | 1552       | 41.3% | 2220     | 59.2% | 58.0%      |
|                  | <b>Wallonia</b> | 1519       | 40.4% | 1157     | 30.8% | 31.7%      |
| <b>Age group</b> | <b>18-24</b>    | 673        | 17.9% | 537      | 14.3% | 13.7%      |
|                  | <b>25-44</b>    | 1154       | 30.7% | 1184     | 31.6% | 31.2%      |
|                  | <b>45-64</b>    | 1267       | 33.7% | 1197     | 31.9% | 32.4%      |
|                  | <b>65+</b>      | 662        | 17.6% | 835      | 22.2% | 22.8%      |
| <b>Sex</b>       | <b>Female</b>   | 2579       | 68.7% | 1948     | 51.9% | 51.1%      |
|                  | <b>Male</b>     | 1177       | 31.3% | 1804     | 48.1% | 48.9%      |

**Table S2.** Characteristics of survey participants in Germany (N=8584), by region of residence, age group, and sex. We compare the raw sample (“unweighted”) to the sample adjusted with the post-stratification weights (“weighted”), and to the distribution of each stratum in the population.

| Variable         | Category      | Unweighted |       | Weighted |       | Population |
|------------------|---------------|------------|-------|----------|-------|------------|
|                  |               | N          | %     | N        | %     | %          |
| <b>Region*</b>   | <b>East</b>   | 2095       | 24.4% | 1477     | 17.2% | 17.7%      |
|                  | <b>North</b>  | 1985       | 23.1% | 1555     | 18.1% | 18.1%      |
|                  | <b>South</b>  | 2157       | 25.1% | 2515     | 29.3% | 29.0%      |
|                  | <b>West</b>   | 2347       | 27.3% | 3037     | 35.4% | 35.2%      |
| <b>Age group</b> | <b>18-24</b>  | 1866       | 21.7% | 1019     | 11.9% | 12.0%      |
|                  | <b>25-44</b>  | 3323       | 38.7% | 2513     | 29.3% | 28.8%      |
|                  | <b>45-64</b>  | 2249       | 26.2% | 2909     | 33.9% | 34.2%      |
|                  | <b>65+</b>    | 1146       | 13.4% | 2143     | 25.0% | 24.9%      |
| <b>Sex</b>       | <b>Female</b> | 5450       | 63.5% | 4374     | 51.0% | 51.0%      |
|                  | <b>Male</b>   | 3134       | 36.5% | 4210     | 49.0% | 49.0%      |

\* The “East” region includes Berlin, Brandenburg, Sachsen, Sachsen-Anhalt, and Thüringen; the “North” regions includes Bremen, Hamburg, Mecklenburg-Vorpommern, Niedersachsen, and Schleswig-Holstein; the “South” region includes Baden-Württemberg and Bayern; the “West” region includes Hessen, Nordrhein-Westfalen, Rheinland-Pfalz, and Saarland.

**Table S3.** Characteristics of survey participants in Spain (N=5360), by region of residence, age group, and sex. We compare the raw sample (“unweighted”) to the sample adjusted with the post-stratification weights (“weighted”), and to the distribution of each stratum in the population.

| Variable         | Category          | Unweighted |       | Weighted |       | Population |
|------------------|-------------------|------------|-------|----------|-------|------------|
|                  |                   | N          | %     | N        | %     | %          |
| <b>Region*</b>   | <b>Central</b>    | 656        | 12.2% | 620      | 11.7% | 11.9%      |
|                  | <b>East</b>       | 1251       | 23.3% | 1500     | 28.3% | 29.1%      |
|                  | <b>Insular</b>    | 417        | 7.8%  | 249      | 4.7%  | 4.8%       |
|                  | <b>Madrid</b>     | 833        | 15.5% | 755      | 14.3% | 14.0%      |
|                  | <b>North East</b> | 620        | 11.6% | 520      | 9.8%  | 9.6%       |
|                  | <b>North West</b> | 749        | 14.0% | 507      | 9.6%  | 9.5%       |
|                  | <b>South</b>      | 834        | 15.6% | 1141     | 21.6% | 21.1%      |
| <b>Age group</b> | <b>18-24</b>      | 430        | 8.0%  | 606      | 11.5% | 11.6%      |
|                  | <b>25-44</b>      | 1994       | 37.2% | 1676     | 31.7% | 31.9%      |
|                  | <b>45-64</b>      | 2175       | 40.6% | 1821     | 34.4% | 33.8%      |
|                  | <b>65+</b>        | 761        | 14.2% | 1188     | 22.5% | 22.8%      |
| <b>Sex</b>       | <b>Female</b>     | 3764       | 70.2% | 2769     | 52.3% | 51.4%      |
|                  | <b>Male</b>       | 1596       | 29.8% | 2523     | 47.7% | 48.6%      |

\* The region “Central” includes Castilla y León, Castilla-la Mancha, and Extremadura; the region “East” includes Cataluña, Comunidad Valenciana, and Illes Balears; the region “Insular” includes Canarias; the region “North East” includes País Vasco, Comunidad Foral de Navarra, La Rioja, and Aragón; the region “North West” includes Galicia, Principado de Asturias, and Cantabria; the region “South” includes Andalucía, Región de Murcia, Ciudad Autónoma de Ceuta, and Ciudad Autónoma de Melilla.



**Table S4.** Characteristics of survey participants in France (N=4875), by region of residence, age group, and sex. We compare the raw sample (“unweighted”) to the sample adjusted with the post-stratification weights (“weighted”), and to the distribution of each stratum in the population.

| Variable         | Category             | Unweighted |       | Weighted |       | Population |
|------------------|----------------------|------------|-------|----------|-------|------------|
|                  |                      | N          | %     | N        | %     | %          |
| <b>Region*</b>   | <b>Corse</b>         | 17         | 0.4%  | 24       | 0.5%  | 0.5%       |
|                  | <b>Île de France</b> | 701        | 14.4% | 906      | 18.7% | 18.5%      |
|                  | <b>North East</b>    | 1032       | 21.2% | 1044     | 21.6% | 22.0%      |
|                  | <b>South East</b>    | 1010       | 20.7% | 979      | 20.2% | 20.2%      |
|                  | <b>South West</b>    | 1043       | 21.4% | 922      | 19.0% | 18.7%      |
|                  | <b>West</b>          | 1072       | 22.0% | 968      | 20.0% | 20.1%      |
| <b>Age group</b> | <b>18-24</b>         | 876        | 18.0% | 698      | 14.4% | 14.2%      |
|                  | <b>25-44</b>         | 1524       | 31.3% | 1435     | 29.6% | 29.4%      |
|                  | <b>45-64</b>         | 1644       | 33.7% | 1527     | 31.5% | 31.6%      |
|                  | <b>65+</b>           | 831        | 17.1% | 1182     | 24.4% | 24.7%      |
| <b>Sex</b>       | <b>Female</b>        | 3490       | 71.6% | 2557     | 52.8% | 52.2%      |
|                  | <b>Male</b>          | 1385       | 28.4% | 2285     | 47.2% | 47.8%      |

\* The region “North East” includes Bourgogne - Franche-Comté, Nord-Pas-de-Calais – Picardie, and Alsace - Champagne-Ardenne – Lorraine; the region “South East” includes Auvergne - Rhône-Alpes, and Provence-Alpes-Côte d'Azur; the region “South West” includes Aquitaine - Limousin - Poitou-Charentes, and Languedoc-Roussillon - Midi-Pyrénées; the region “West” includes Centre - Val de Loire, Normandie, Pays-de-la-Loire, and Bretagne.

**Table S5.** Characteristics of survey participants in Italy (N=7701), by region of residence, age group, and sex. We compare the raw sample (“unweighted”) to the sample adjusted with the post-stratification weights (“weighted”), and to the distribution of each stratum in the population.

| Variable         | Category          | Unweighted |       | Weighted |       | Population |
|------------------|-------------------|------------|-------|----------|-------|------------|
|                  |                   | N          | %     | N        | %     | %          |
| <b>Region*</b>   | <b>Central</b>    | 1640       | 21.3% | 1521     | 19.9% | 20.0%      |
|                  | <b>Insular</b>    | 812        | 10.5% | 810      | 10.6% | 11.0%      |
|                  | <b>North East</b> | 1935       | 25.1% | 1516     | 19.9% | 19.3%      |
|                  | <b>North West</b> | 2311       | 30.0% | 2025     | 26.5% | 26.7%      |
|                  | <b>South</b>      | 1003       | 13.0% | 1761     | 23.1% | 23.0%      |
| <b>Age group</b> | <b>18-24</b>      | 1598       | 20.8% | 834      | 10.9% | 11.2%      |
|                  | <b>25-44</b>      | 3152       | 40.9% | 2187     | 28.7% | 28.1%      |
|                  | <b>45-64</b>      | 2072       | 26.9% | 2609     | 34.2% | 34.4%      |
|                  | <b>65+</b>        | 879        | 11.4% | 2003     | 26.2% | 26.3%      |
| <b>Sex</b>       | <b>Female</b>     | 5042       | 65.5% | 4030     | 52.8% | 51.7%      |
|                  | <b>Male</b>       | 2659       | 34.5% | 3602     | 47.2% | 48.3%      |

\* The region “Central” includes Toscana, Umbria, Marche, and Lazio; the region “Insular” includes Sicilia and Sardegna; the region “North East” includes Provincia Autonoma di Bolzano/Bozen, Provincia Autonoma di Trento, Veneto, Friuli-Venezia Giulia, and Emilia-Romagna; the region “North West” includes Piemonte, Valle d’Aosta/Vallée d’Aoste, Liguria, and Lombardia; the region “South” includes Abruzzo, Molise, Campania, Puglia, Basilicata, and Calabria.

**Table S6.** Characteristics of survey participants in the Netherlands (N=3537), by region of residence, age group, and sex. We compare the raw sample (“unweighted”) to the sample adjusted with the post-stratification weights (“weighted”), and to the distribution of each stratum in the population.

| Variable         | Category      | Unweighted |       | Weighted |       | Population |
|------------------|---------------|------------|-------|----------|-------|------------|
|                  |               | N          | %     | N        | %     | %          |
| <b>Region*</b>   | <b>East</b>   | 879        | 24.9% | 746      | 21.1% | 20.9%      |
|                  | <b>North</b>  | 735        | 20.8% | 353      | 10.0% | 10.1%      |
|                  | <b>South</b>  | 888        | 25.1% | 759      | 21.5% | 21.5%      |
|                  | <b>West</b>   | 1035       | 29.3% | 1673     | 47.4% | 47.5%      |
| <b>Age group</b> | <b>18-24</b>  | 502        | 14.2% | 537      | 15.2% | 14.7%      |
|                  | <b>25-44</b>  | 880        | 24.9% | 1012     | 28.7% | 29.3%      |
|                  | <b>45-64</b>  | 1319       | 37.3% | 1187     | 33.6% | 33.3%      |
|                  | <b>65+</b>    | 836        | 23.6% | 795      | 22.5% | 22.8%      |
| <b>Sex</b>       | <b>Female</b> | 2370       | 67.0% | 1802     | 51.0% | 50.6%      |
|                  | <b>Male</b>   | 1167       | 33.0% | 1729     | 49.0% | 49.4%      |

\* The region “East” includes Overijssel, Gelderland, and Flevoland; the region “North” includes Groningen, Friesland, and Drenthe; the region “South” includes Noord-Brabant and Limburg; the region “West” includes Utrecht, Noord-Holland, Zuid-Holland, and Zeeland.

**Table S7.** Characteristics of survey participants in the United Kingdom (N=7416), by region of residence, age group, and sex. We compare the raw sample (“unweighted”) to the sample adjusted with the post-stratification weights (“weighted”), and to the distribution of each stratum in the population.

| Variable         | Category                | Unweighted |       | Weighted |       | Population |
|------------------|-------------------------|------------|-------|----------|-------|------------|
|                  |                         | N          | %     | N        | %     | %          |
| <b>Region</b>    | <b>England</b>          | 3458       | 46.6% | 5218     | 70.8% | 70.9%      |
|                  | <b>London</b>           | 774        | 10.4% | 972      | 13.2% | 13.2%      |
|                  | <b>Northern Ireland</b> | 545        | 7.4%  | 204      | 2.8%  | 2.8%       |
|                  | <b>Scotland</b>         | 1506       | 20.3% | 616      | 8.4%  | 8.4%       |
|                  | <b>Wales</b>            | 1133       | 15.3% | 356      | 4.8%  | 4.8%       |
| <b>Age group</b> | <b>18-24</b>            | 595        | 8.0%  | 1018     | 13.8% | 14.3%      |
|                  | <b>25-44</b>            | 1846       | 24.9% | 2355     | 32.0% | 31.8%      |
|                  | <b>45-64</b>            | 3070       | 41.4% | 2332     | 31.7% | 31.4%      |
|                  | <b>65+</b>              | 1905       | 25.7% | 1662     | 22.6% | 22.4%      |
| <b>Sex</b>       | <b>Female</b>           | 4852       | 65.4% | 3789     | 51.4% | 51.0%      |
|                  | <b>Male</b>             | 2564       | 34.6% | 3578     | 48.6% | 49.0%      |

**Table S8.** Characteristics of survey participants in the United States (N=12489), by region of residence, age group, and sex. We compare the raw sample (“unweighted”) to the sample adjusted with the post-stratification weights (“weighted”), and to the distribution of each stratum in the population.

| Variable         | Category          | Unweighted |       | Weighted |       | Population |
|------------------|-------------------|------------|-------|----------|-------|------------|
|                  |                   | N          | %     | N        | %     | %          |
| <b>Region*</b>   | <b>Midwest</b>    | 3361       | 26.9% | 2648     | 20.0% | 20.9%      |
|                  | <b>North East</b> | 2808       | 22.5% | 2347     | 17.7% | 17.5%      |
|                  | <b>South</b>      | 3070       | 24.6% | 5176     | 39.1% | 37.8%      |
|                  | <b>West</b>       | 3250       | 26.0% | 3065     | 23.2% | 23.8%      |
| <b>Age group</b> | <b>18-24</b>      | 1388       | 11.1% | 2790     | 21.1% | 16.1%      |
|                  | <b>25-44</b>      | 3396       | 27.2% | 4658     | 35.2% | 32.6%      |
|                  | <b>45-64</b>      | 4256       | 34.1% | 3659     | 27.7% | 31.5%      |
|                  | <b>65+</b>        | 3449       | 27.6% | 2129     | 16.1% | 19.7%      |
| <b>Sex</b>       | <b>Female</b>     | 8333       | 66.7% | 7005     | 52.9% | 51.2%      |
|                  | <b>Male</b>       | 4156       | 33.3% | 6231     | 47.1% | 48.8%      |

\* The region “Midwest” includes Illinois, Indiana, Iowa, Kansas, Michigan, Minnesota, Missouri, Nebraska, North Dakota, Ohio, South Dakota, and Wisconsin; the region “North East” includes Connecticut, Maine, Massachusetts, New Hampshire, New Jersey, New York, Pennsylvania, Rhode Island, and Vermont; the region “South” includes Alabama, Arkansas, Delaware, Florida, Georgia, Kentucky, Louisiana, Maryland, Mississippi, North Carolina, Oklahoma, South Carolina, Tennessee, Texas, Virginia, and West Virginia; the region “West” includes Alaska, Arizona, California, Colorado, Hawaii, Idaho, Montana, Nevada, New Mexico, Oregon, Utah, Washington, and Wyoming.

### Sensitivity analysis for the contact threshold values

Tables S9-S16 compare the contact threshold scenario presented in the manuscript, where individuals who reported more contacts than the 90% quantile of the contact distribution per setting were removed, with the scenario considered in the sensitivity analysis, where individuals who reported 30 or more contacts per setting were removed. For each scenario, we show the minimum, the median, and the first and the third quartile, and the maximum number of contacts for each setting and overall, as well as the number of missing values (either because the participant did not report it or because he or she reported a number of contacts above the considered threshold).

Under the 90% quantile scenario used in the main analysis, the number of missing values (due either to respondents who did not provide any contact number or who reported a number of contacts above the threshold) was much higher than under the  $\leq 29$  scenario. Even though these thresholds might lead to different average contacts numbers, which is a metric not robust to outliers, the effect on the median and the quartiles was much smaller, with differences between the two outliers' scenarios mainly found in Germany, the Netherlands, and the United States for the home contacts (and hence for the overall contacts).

**Table S9.** Contact distribution by threshold in each setting and overall, for Belgium (N=3756).

| Threshold       | Statistic          | Overall | Home | School | Work | General community |
|-----------------|--------------------|---------|------|--------|------|-------------------|
| 90%<br>quantile | Minimum            | 0       | 0    | 0      | 0    | 0                 |
|                 | First quartile     | 1       | 0    | 0      | 0    | 0                 |
|                 | Median             | 2       | 1    | 0      | 0    | 0                 |
|                 | Third quartile     | 4       | 2    | 0      | 0    | 1                 |
|                 | Maximum            | 28      | 4    | 0      | 25   | 7                 |
|                 | No. missing values | 492     | 185  | 50     | 142  | 168               |
| $\leq 29$       | Minimum            | 0       | 0    | 0      | 0    | 0                 |
|                 | First quartile     | 1       | 0    | 0      | 0    | 0                 |
|                 | Median             | 2       | 1    | 0      | 0    | 0                 |
|                 | Third quartile     | 4       | 2    | 0      | 0    | 1                 |
|                 | Maximum            | 45      | 13   | 17     | 26   | 29                |
|                 | No. missing values | 156     | 2    | 2      | 139  | 23                |

**Table S10.** Contact distribution by threshold in each setting and overall, for Germany (N=8584).

| Threshold           | Statistic                 | Overall | Home | School | Work | General community |
|---------------------|---------------------------|---------|------|--------|------|-------------------|
| <b>90% quantile</b> | <b>Minimum</b>            | 0       | 0    | 0      | 0    | 0                 |
|                     | <b>First quartile</b>     | 1       | 1    | 0      | 0    | 0                 |
|                     | <b>Median</b>             | 3       | 1    | 0      | 0    | 0                 |
|                     | <b>Third quartile</b>     | 6       | 2    | 0      | 1    | 2                 |
|                     | <b>Maximum</b>            | 35      | 4    | 0      | 25   | 7                 |
|                     | <b>No. Missing values</b> | 1523    | 530  | 98     | 424  | 756               |
| <b>≤ 29</b>         | <b>Minimum</b>            | 0       | 0    | 0      | 0    | 0                 |
|                     | <b>First quartile</b>     | 2       | 1    | 0      | 0    | 0                 |
|                     | <b>Median</b>             | 4       | 1    | 0      | 0    | 1                 |
|                     | <b>Third quartile</b>     | 7       | 3    | 0      | 1    | 2                 |
|                     | <b>Maximum</b>            | 61      | 29   | 24     | 28   | 27                |
|                     | <b>No. Missing values</b> | 540     | 14   | 8      | 416  | 170               |

**Table S11.** Contact distribution by threshold in each setting and overall, for Spain (N=5360).

| Threshold           | Statistic                 | Overall | Home | School | Work | General community |
|---------------------|---------------------------|---------|------|--------|------|-------------------|
| <b>90% quantile</b> | <b>Minimum</b>            | 0       | 0    | 0      | 0    | 0                 |
|                     | <b>First quartile</b>     | 1       | 1    | 0      | 0    | 0                 |
|                     | <b>Median</b>             | 2       | 1    | 0      | 0    | 0                 |
|                     | <b>Third quartile</b>     | 3       | 3    | 0      | 0    | 0                 |
|                     | <b>Maximum</b>            | 31      | 4    | 0      | 25   | 7                 |
|                     | <b>No. Missing values</b> | 568     | 213  | 82     | 148  | 195               |
| <b>≤ 29</b>         | <b>Minimum</b>            | 0       | 0    | 0      | 0    | 0                 |
|                     | <b>First quartile</b>     | 1       | 1    | 0      | 0    | 0                 |
|                     | <b>Median</b>             | 2       | 2    | 0      | 0    | 0                 |
|                     | <b>Third quartile</b>     | 4       | 3    | 0      | 0    | 1                 |
|                     | <b>Maximum</b>            | 76      | 28   | 25     | 28   | 25                |
|                     | <b>No. Missing values</b> | 198     | 12   | 7      | 145  | 56                |

**Table S12.** Contact distribution by threshold in each setting and overall, for France (N=4875).

| Threshold               | Statistic                 | Overall | Home | School | Work | General community |
|-------------------------|---------------------------|---------|------|--------|------|-------------------|
| <b>90%<br/>quantile</b> | <b>Minimum</b>            | 0       | 0    | 0      | 0    | 0                 |
|                         | <b>First quartile</b>     | 1       | 0    | 0      | 0    | 0                 |
|                         | <b>Median</b>             | 2       | 1    | 0      | 0    | 0                 |
|                         | <b>Third quartile</b>     | 3       | 2    | 0      | 0    | 0                 |
|                         | <b>Maximum</b>            | 32      | 4    | 0      | 25   | 7                 |
|                         | <b>No. Missing values</b> | 560     | 166  | 66     | 179  | 225               |
| <b>≤ 29</b>             | <b>Minimum</b>            | 0       | 0    | 0      | 0    | 0                 |
|                         | <b>First quartile</b>     | 1       | 0    | 0      | 0    | 0                 |
|                         | <b>Median</b>             | 2       | 1    | 0      | 0    | 0                 |
|                         | <b>Third quartile</b>     | 4       | 2    | 0      | 0    | 1                 |
|                         | <b>Maximum</b>            | 54      | 18   | 25     | 28   | 25                |
|                         | <b>No. Missing values</b> | 223     | 4    | 7      | 176  | 62                |

**Table S13.** Contact distribution by threshold in each setting and overall, for Italy (N=7701).

| Threshold               | Statistic                 | Overall | Home | School | Work | General community |
|-------------------------|---------------------------|---------|------|--------|------|-------------------|
| <b>90%<br/>quantile</b> | <b>Minimum</b>            | 0       | 0    | 0      | 0    | 0                 |
|                         | <b>First quartile</b>     | 1       | 1    | 0      | 0    | 0                 |
|                         | <b>Median</b>             | 2       | 2    | 0      | 0    | 0                 |
|                         | <b>Third quartile</b>     | 4       | 3    | 0      | 0    | 1                 |
|                         | <b>Maximum</b>            | 30      | 4    | 0      | 25   | 7                 |
|                         | <b>No. Missing values</b> | 734     | 387  | 83     | 169  | 162               |
| <b>≤ 29</b>             | <b>Minimum</b>            | 0       | 0    | 0      | 0    | 0                 |
|                         | <b>First quartile</b>     | 1       | 1    | 0      | 0    | 0                 |
|                         | <b>Median</b>             | 2       | 2    | 0      | 0    | 0                 |
|                         | <b>Third quartile</b>     | 4       | 3    | 0      | 0    | 1                 |
|                         | <b>Maximum</b>            | 42      | 22   | 22     | 25   | 23                |
|                         | <b>No. Missing values</b> | 195     | 12   | 5      | 169  | 24                |



**Table S14.** Contact distribution by threshold in each setting and overall, for the Netherlands (N=3537).

| Threshold               | Statistic                 | Overall | Home | School | Work | General community |
|-------------------------|---------------------------|---------|------|--------|------|-------------------|
| <b>90%<br/>quantile</b> | <b>Minimum</b>            | 0       | 0    | 0      | 0    | 0                 |
|                         | <b>First quartile</b>     | 1       | 1    | 0      | 0    | 0                 |
|                         | <b>Median</b>             | 3       | 1    | 0      | 0    | 0                 |
|                         | <b>Third quartile</b>     | 5       | 2    | 0      | 0    | 2                 |
|                         | <b>Maximum</b>            | 33      | 4    | 0      | 25   | 7                 |
|                         | <b>No. Missing values</b> | 517     | 237  | 50     | 124  | 188               |
| <b>≤ 29</b>             | <b>Minimum</b>            | 0       | 0    | 0      | 0    | 0                 |
|                         | <b>First quartile</b>     | 1       | 1    | 0      | 0    | 0                 |
|                         | <b>Median</b>             | 3       | 1    | 0      | 0    | 0                 |
|                         | <b>Third quartile</b>     | 7       | 3    | 0      | 0    | 2                 |
|                         | <b>Maximum</b>            | 46      | 20   | 18     | 29   | 25                |
|                         | <b>No. Missing values</b> | 151     | 9    | 4      | 120  | 29                |

**Table S15.** Contact distribution by threshold in each setting and overall, for the UK (N=7416).

| Threshold               | Statistic                 | Overall | Home | School | Work | General community |
|-------------------------|---------------------------|---------|------|--------|------|-------------------|
| <b>90%<br/>quantile</b> | <b>Minimum</b>            | 0       | 0    | 0      | 0    | 0                 |
|                         | <b>First quartile</b>     | 1       | 1    | 0      | 0    | 0                 |
|                         | <b>Median</b>             | 2       | 1    | 0      | 0    | 0                 |
|                         | <b>Third quartile</b>     | 4       | 2    | 0      | 0    | 1                 |
|                         | <b>Maximum</b>            | 34      | 4    | 0      | 25   | 7                 |
|                         | <b>No. Missing values</b> | 1241    | 437  | 178    | 361  | 565               |
| <b>≤ 29</b>             | <b>Minimum</b>            | 0       | 0    | 0      | 0    | 0                 |
|                         | <b>First quartile</b>     | 1       | 1    | 0      | 0    | 0                 |
|                         | <b>Median</b>             | 2       | 1    | 0      | 0    | 0                 |
|                         | <b>Third quartile</b>     | 5       | 3    | 0      | 0    | 2                 |
|                         | <b>Maximum</b>            | 79      | 25   | 25     | 29   | 29                |
|                         | <b>No. Missing values</b> | 479     | 16   | 35     | 353  | 170               |

**Table S16.** Contact distribution by threshold in each setting and overall, for the US (N=12,479).

| Threshold       | Statistic          | Overall | Home | School | Work | General community |
|-----------------|--------------------|---------|------|--------|------|-------------------|
| 90%<br>quantile | Minimum            | 0       | 0    | 0      | 0    | 0                 |
|                 | First quartile     | 1       | 1    | 0      | 0    | 0                 |
|                 | Median             | 2       | 1    | 0      | 0    | 0                 |
|                 | Third quartile     | 4       | 2    | 0      | 0    | 2                 |
|                 | Maximum            | 34      | 4    | 0      | 25   | 7                 |
|                 | No. Missing values | 2491    | 1098 | 204    | 590  | 1127              |
| ≤ 29            | Minimum            | 0       | 0    | 0      | 0    | 0                 |
|                 | First quartile     | 1       | 1    | 0      | 0    | 0                 |
|                 | Median             | 3       | 1    | 0      | 0    | 0                 |
|                 | Third quartile     | 6       | 3    | 0      | 0    | 2                 |
|                 | Maximum            | 60      | 28   | 25     | 29   | 28                |
|                 | No. Missing values | 853     | 28   | 48     | 586  | 317               |

### Distribution of contact numbers

Two features of the highly skewed distribution of the overall social contacts (Figure S2) are worth noting. First, we found that the percentages of participants who reported having fewer than one contact per day were relatively high, at more than 35% in all countries except for Germany, the Netherlands, and the US. Second, the distribution was characterized by a long right tail, the length of which depended on the threshold used to remove the outliers at the top of the distribution (Tables S9-S16).

A

Excluding daily contact numbers above the 90% quantile

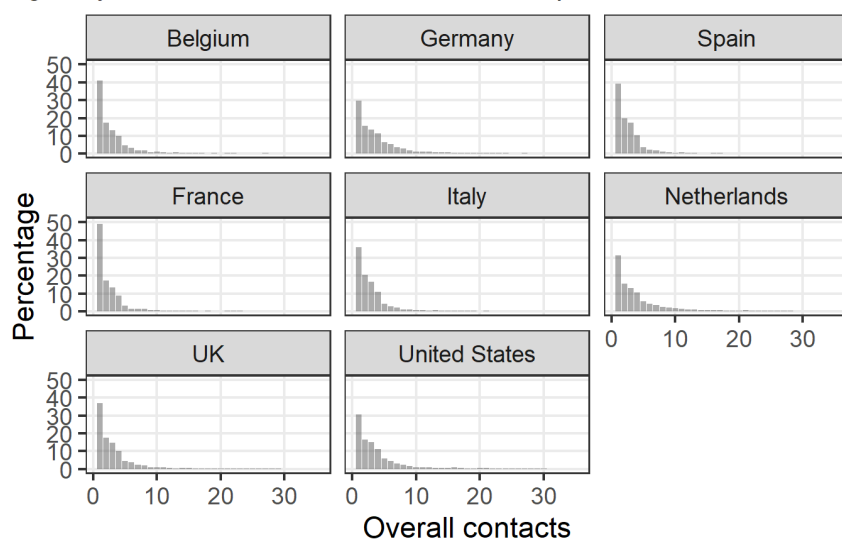

B

Excluding daily contact numbers above 29

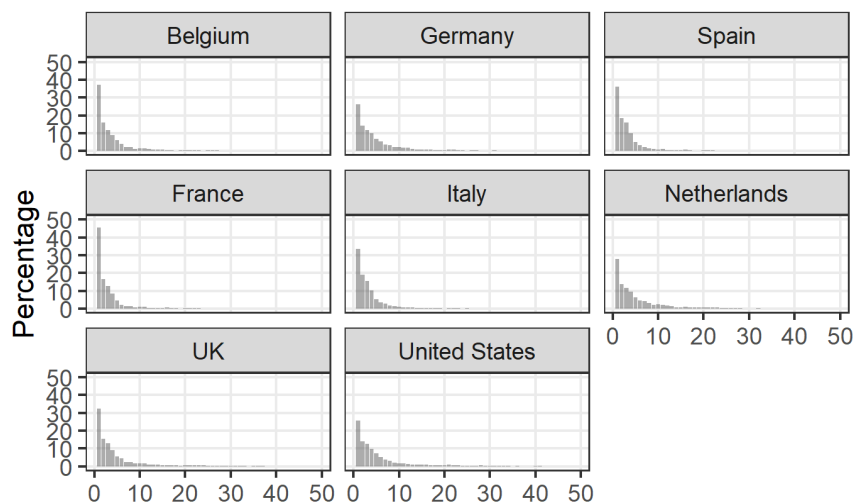

**Figure S2.** Histogram with the weighted distribution of the overall number of contacts by country. All contacts exclude the top 10% (A) and those equal to 30 or more (B).

### Contact numbers by setting and week

In Figures S3-S4, we showed the evolution of the weekly average number of contacts by setting, after applying the post-stratification weights, under the two threshold scenarios. As expected, home and school contact numbers showed little to no variability, with the former remaining almost constant during the whole study period, and the latter being reduced to zero due to school closures in every surveyed country.

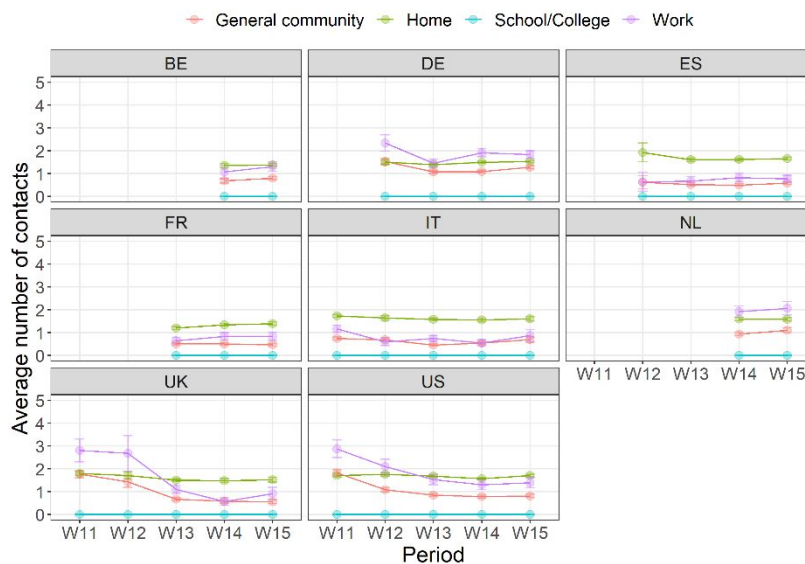

**Figure S3.** Average number of daily social contacts by setting, week, and country. Respondents with contacts above the 90% quantile threshold were removed from the analysis.

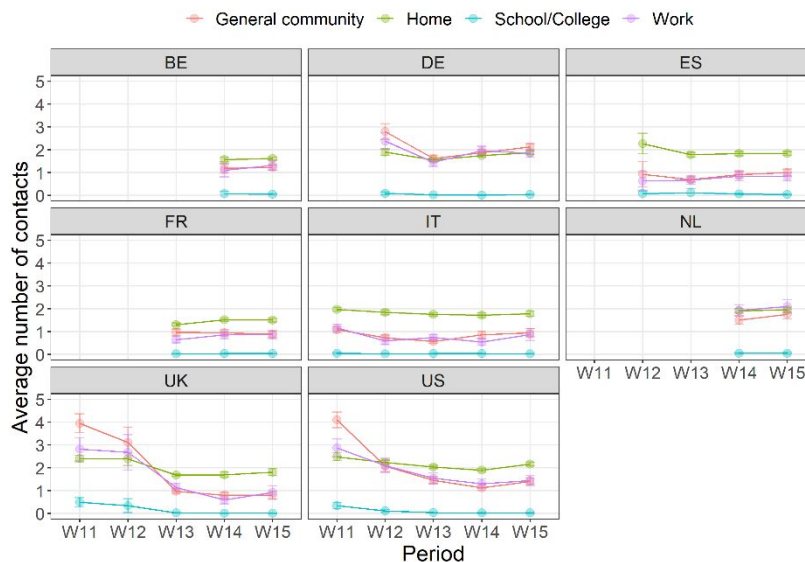

**Figure S4.** Average number of daily social contacts by setting, week, and country. Respondents with contacts above the  $\leq 29$  threshold were removed from the analysis.

### Household size and home contacts

Figure S5 shows the consistency of the household size and the number of home contacts under the two thresholds. More than half of respondents lived either alone or with another person. Respondents living in large households, with five members or more, were more frequent in the US (above 10%). Home contacts ranged between around half a contact per day, reported by people living alone, to three contacts per day or more, reported by people living in households of four or more components, regardless of the threshold.

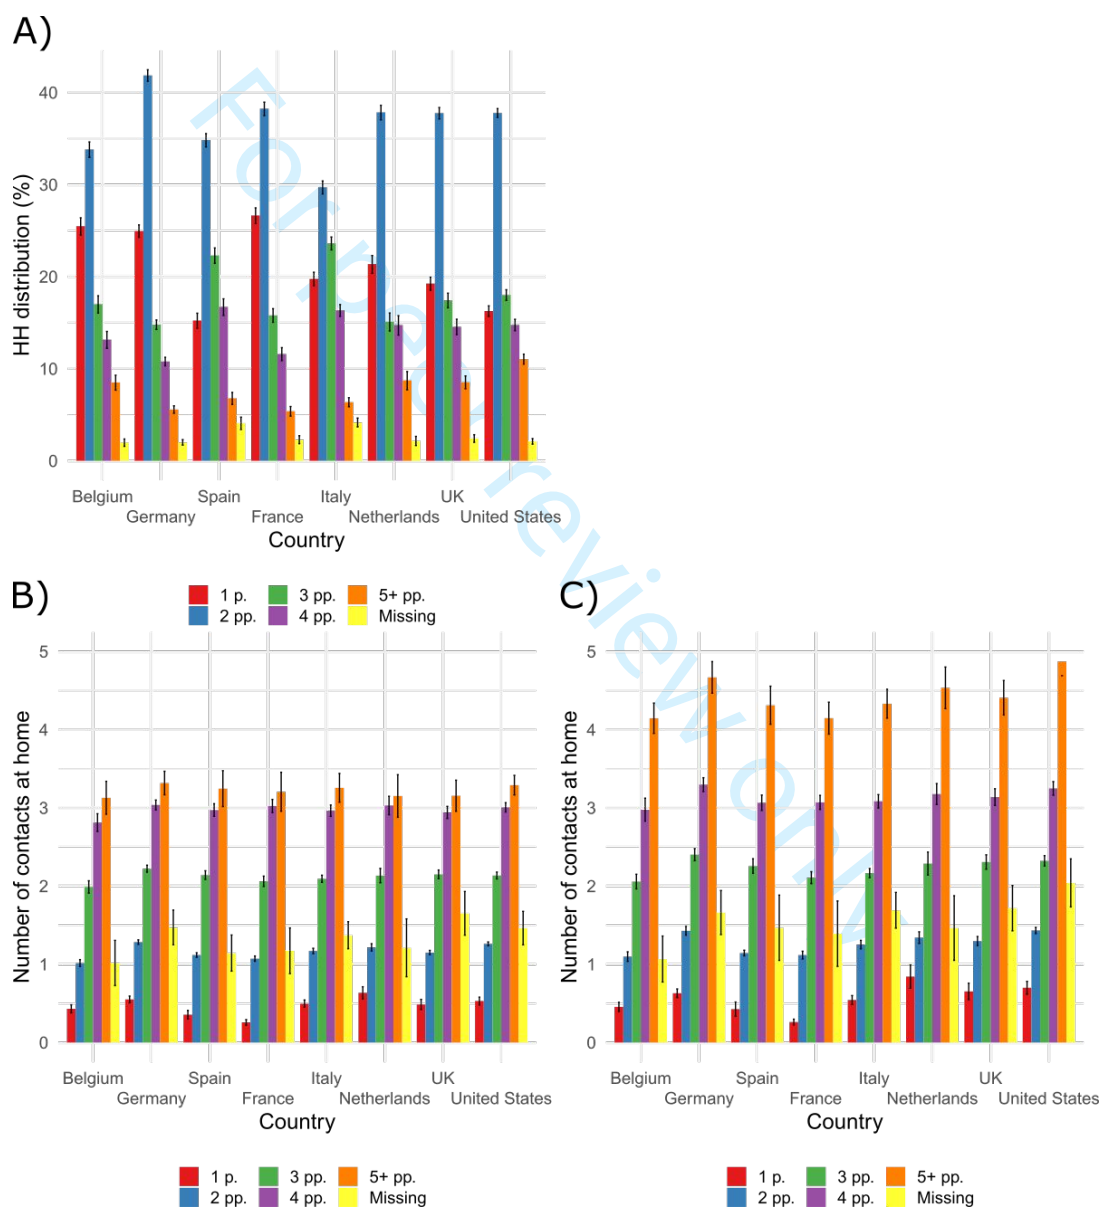

**Figure S5.** Household size distribution by country (A), compared to the average number of contacts at home by household size and country, under the 90% quantile threshold (B), and under the  $\leq 29$  threshold (C).

### Contact numbers by age group and week at work and in the general community

Figures S6-S8 show in panel A the weekly evolution of the predicted number of contacts, overall, at work and in the general community, respectively, in the pre-COVID period [10,11] and during our study, stratified by age group. In panel B, we show the comparison between the values in the pre-COVID period and those in the first week available for each country. The United States and Spain are excluded from panel B, as no pre-COVID data are available for these two countries.

The evolution of the model-predicted overall daily contact numbers by week showed a decreasing variation in social contact numbers that was uniform across age groups (Figure S6). Higher social contact numbers were estimated for people aged 18-24 years, while those aged 65+ years usually reported the lowest numbers from the beginning of the study period.

When we looked at the trends in work contact numbers (Figure S7), we found that the 65+ age group reported having fewer contacts than the other age groups, except in Belgium and France. When we focused on the countries with the longest observation time periods, we noticed that among the youngest age groups in the UK, there was an overall decrease in work contact numbers throughout the study period that might reflect the implementation of physical distancing measures over time. By contrast, when we examined countries such as France, Spain, and Italy, we found that the younger age groups already had few to no contacts, which is likely because in these countries, the full lockdown measures were already preventing a large portion of the population from going to work.

The trends for contact numbers in the general community did not differ significantly by age group, or by week (Figure S8). Moreover, these contact numbers had already reached their lowest levels by the beginning of the study period in each country, except in the UK and the US. This evidence might suggest that, except in the latter two countries, the big drop in the overall contacts shown in Figure S6 in the manuscript is mostly attributable to a reduction in work contact numbers, and not to a reduction in contact numbers in the general community.

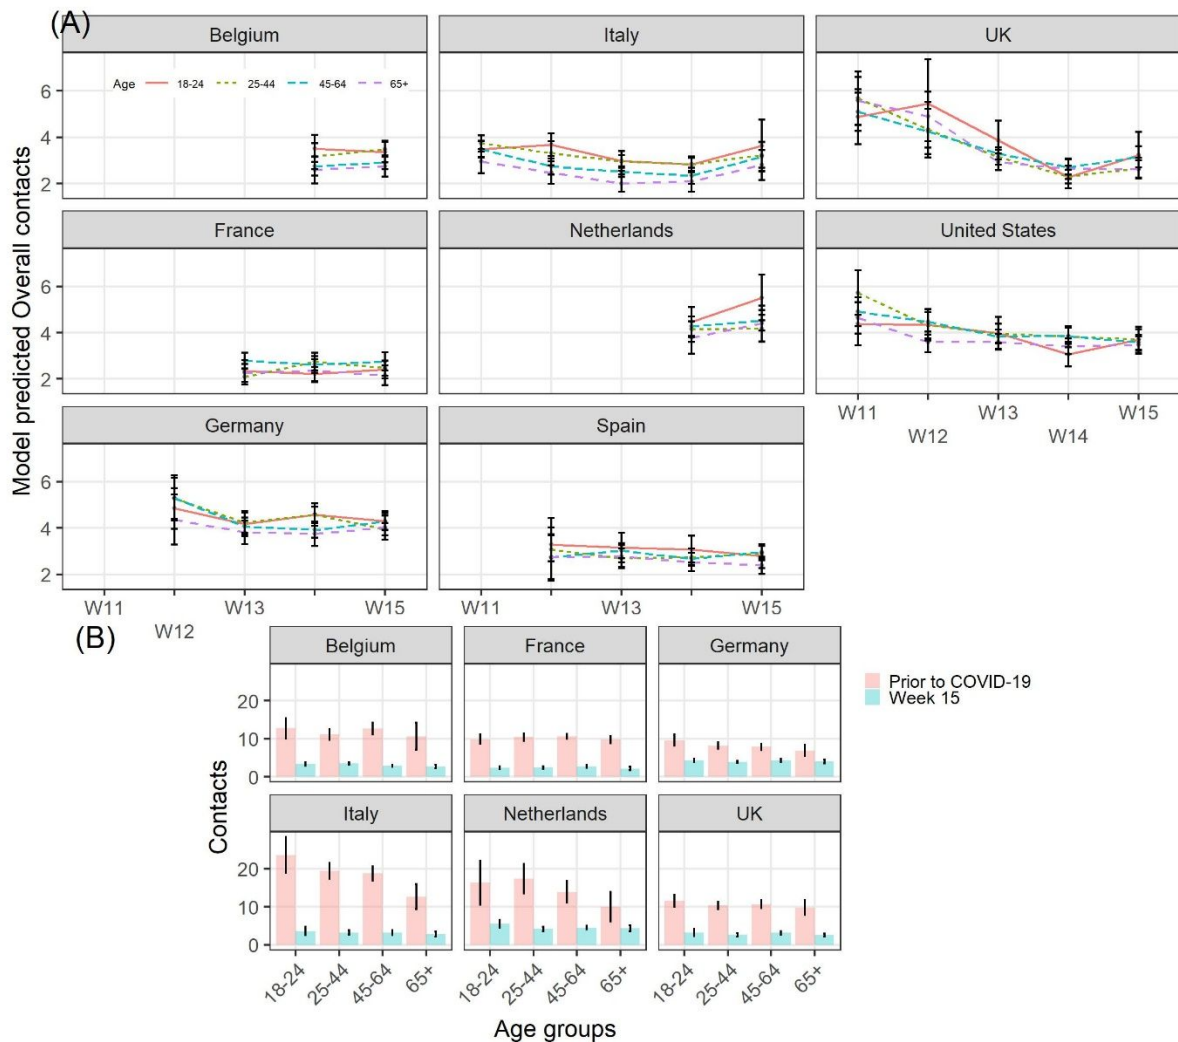

**Figure S6.** Model-predicted daily number of overall social contacts, by age group, country, and week, March-April 2020. (A). Comparison of model-predicted overall contact numbers between the pre-COVID period and calendar week 15, by country (B). Respondents with contacts above the 90% quantile threshold were removed from the analysis.

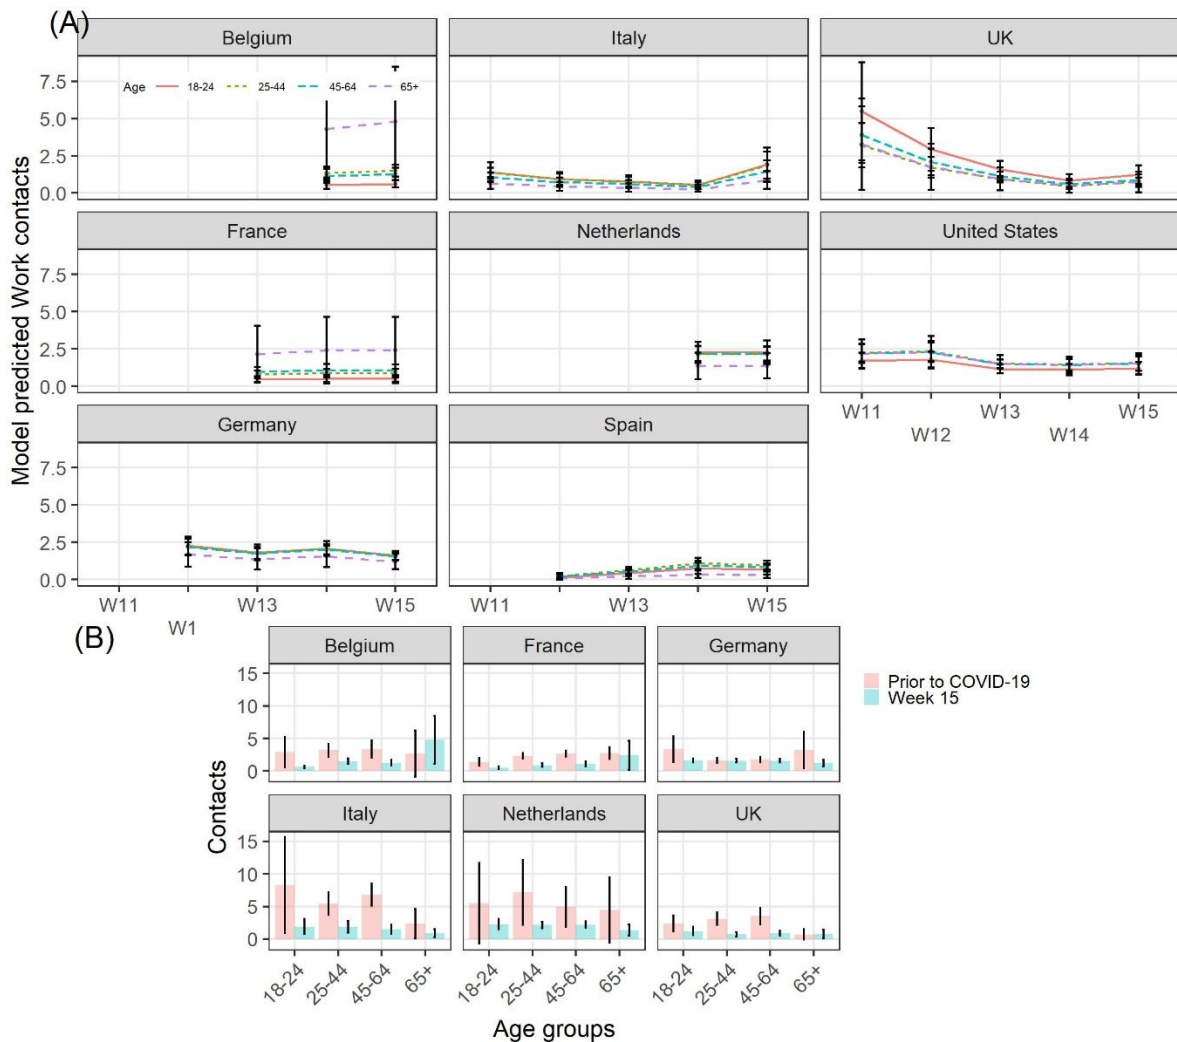

**Figure S7.** Model-predicted daily number of social contacts at work, by age group, country, and week, March-April 2020. (A). Comparison of model-predicted contact numbers at work between the pre-COVID period and calendar week 15, by country (B). Respondents with contacts above the 90% quantile threshold were removed from the analysis.



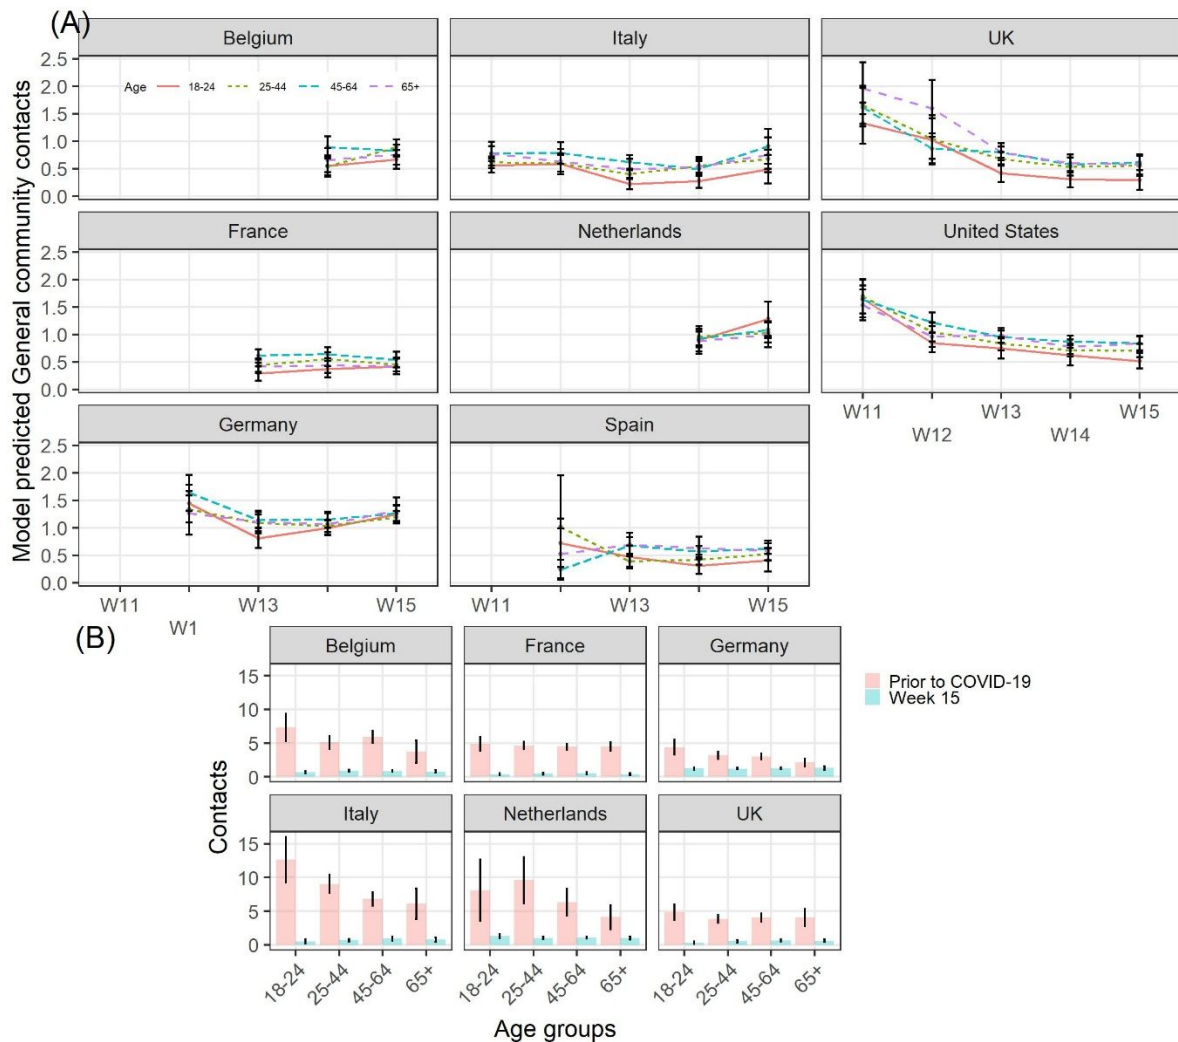

**Figure S8.** Model-predicted daily number of social contacts in the general community, by age group, country, and week, March-April 2020. (A). Comparison of model-predicted contact numbers in the general community between the pre-COVID period and calendar week 15, by country (B). Respondents with contacts above the 90% quantile threshold were removed from the analysis.

### SENSITIVITY ANALYSIS

We performed a sensitivity analysis of the threshold chosen to curtail the right tail of the distribution of social contacts, in response to the extremely high values reported by some of the participants. In the main analysis, we presented the results of the threshold corresponding to the 90% quantile of the distribution of the setting-specific contacts (removing the respondents with more contacts than the threshold from the analysis sample), which were subsequently summed up to provide the overall count of contacts. In the following figures and tables, we present the results of the analysis using a fixed cut-off point at 29 contacts per day, removing respondents reporting 30 contacts per day or more in each of the settings.

Figure S9 shows the daily pattern of contacts, overall and in different settings (home, work, and general community). The time patterns per country are like those shown by the 90% quantile threshold, shown in Fig 1 in the manuscript, even though the daily numbers and the weekly estimates (Table S17) are generally higher by about one contact per day per setting.

Figures S10 to S12 show the estimates of the daily contact numbers by week, overall, at work, and in the general community, disaggregated by age group. We found that contact numbers in the last study week (week 15, April 6 – 12) were indeed lower than those reported by the same age groups in the period prior to COVID-19 in almost all countries, even though not as much as with the 90% quantile threshold. The exception was Germany, as for most of the age groups, especially the older adults, we did not find evidence of a reduction in social contacts compared to the pre-pandemic period, regardless of the setting.



**Table S17.** Model-predicted mean number (with SE) of daily contacts per person compared with pre-pandemic model predictions, by country, setting, and week, March-April 2020. Respondents with contacts above the  $\leq 29$  threshold were removed from the analysis.

| Country        | Setting           | Prior to COVID-19 |      | Week 11 (Mar 9 – 15) |      | Week 12 (Mar 16 – 22) |      | Week 13 (March 23 – 29) |      | Week 14 (Mar 30 - Apr 5) |      | Week 15 (Apr 6 – 12) |      |
|----------------|-------------------|-------------------|------|----------------------|------|-----------------------|------|-------------------------|------|--------------------------|------|----------------------|------|
|                |                   | Mean              | SE   | Mean                 | SE   | Mean                  | SE   | Mean                    | SE   | Mean                     | SE   | Mean                 | SE   |
| Belgium        | Work              | 3.2               | 0.41 |                      |      |                       |      |                         |      | 1.22                     | 0.18 | 1.35                 | 0.14 |
|                | General community | 5.33              | 0.29 |                      |      |                       |      |                         |      | 1.09                     | 0.1  | 1.23                 | 0.06 |
|                | Overall           | 11.76             | 0.48 |                      |      |                       |      |                         |      | 3.83                     | 0.21 | 4.14                 | 0.13 |
| France         | Work              | 2.37              | 0.12 |                      |      |                       |      | 0.86                    | 0.13 | 0.98                     | 0.16 | 0.96                 | 0.14 |
|                | General community | 4.59              | 0.13 |                      |      |                       |      | 0.88                    | 0.07 | 1.04                     | 0.08 | 0.84                 | 0.08 |
|                | Overall           | 10.3              | 0.21 |                      |      |                       |      | 2.99                    | 0.14 | 3.24                     | 0.13 | 3.14                 | 0.14 |
| Germany        | Work              | 1.83              | 0.17 |                      |      | 2.24                  | 0.26 | 1.78                    | 0.19 | 2.05                     | 0.16 | 1.56                 | 0.1  |
|                | General community | 2.98              | 0.14 |                      |      | 2.9                   | 0.27 | 1.6                     | 0.08 | 1.81                     | 0.07 | 2.03                 | 0.08 |
|                | Overall           | 8.03              | 0.27 |                      |      | 7.04                  | 0.45 | 4.91                    | 0.15 | 5.22                     | 0.12 | 5.38                 | 0.12 |
| Italy          | Work              | 5.72              | 0.62 | 1.21                 | 0.13 | 0.82                  | 0.16 | 0.67                    | 0.15 | 0.47                     | 0.08 | 1.65                 | 0.39 |
|                | General community | 7.93              | 0.36 | 0.95                 | 0.06 | 0.81                  | 0.08 | 0.56                    | 0.04 | 0.79                     | 0.08 | 1.06                 | 0.13 |
|                | Overall           | 18.22             | 0.61 | 4.04                 | 0.12 | 3.45                  | 0.16 | 2.98                    | 0.09 | 3.15                     | 0.16 | 3.91                 | 0.27 |
| Netherlands    | Work              | 5.83              | 1.31 |                      |      |                       |      |                         |      | 2.22                     | 0.2  | 2.19                 | 0.19 |
|                | General community | 7.13              | 0.76 |                      |      |                       |      |                         |      | 1.47                     | 0.09 | 1.64                 | 0.09 |
|                | Overall           | 15.03             | 1.2  |                      |      |                       |      |                         |      | 5.11                     | 0.17 | 5.71                 | 0.21 |
| Spain          | Work              |                   |      |                      |      | 0.19                  | 0.09 | 0.56                    | 0.09 | 0.98                     | 0.15 | 0.88                 | 0.12 |
|                | General community |                   |      |                      |      | 1.06                  | 0.4  | 0.73                    | 0.06 | 0.87                     | 0.07 | 0.97                 | 0.08 |
|                | Overall           |                   |      |                      |      | 3.38                  | 0.33 | 3.3                     | 0.14 | 3.54                     | 0.15 | 3.56                 | 0.13 |
| United Kingdom | Work              | 3.02              | 0.39 | 3.85                 | 0.94 | 2.04                  | 0.4  | 1.16                    | 0.11 | 0.59                     | 0.12 | 0.82                 | 0.17 |
|                | General community | 4.06              | 0.21 | 3.91                 | 0.35 | 2.41                  | 0.34 | 1.03                    | 0.06 | 0.69                     | 0.07 | 0.76                 | 0.09 |
|                | Overall           | 10.54             | 0.35 | 8.42                 | 0.49 | 6.93                  | 0.58 | 3.88                    | 0.14 | 2.93                     | 0.14 | 3.48                 | 0.19 |
| United States  | Work              |                   |      | 2.11                 | 0.27 | 2.23                  | 0.3  | 1.45                    | 0.13 | 1.38                     | 0.18 | 1.5                  | 0.23 |
|                | General community |                   |      | 3.61                 | 0.26 | 1.94                  | 0.13 | 1.38                    | 0.07 | 1.1                      | 0.06 | 1.24                 | 0.08 |
|                | Overall           |                   |      | 8.01                 | 0.46 | 5.95                  | 0.25 | 4.9                     | 0.15 | 4.32                     | 0.14 | 4.69                 | 0.16 |

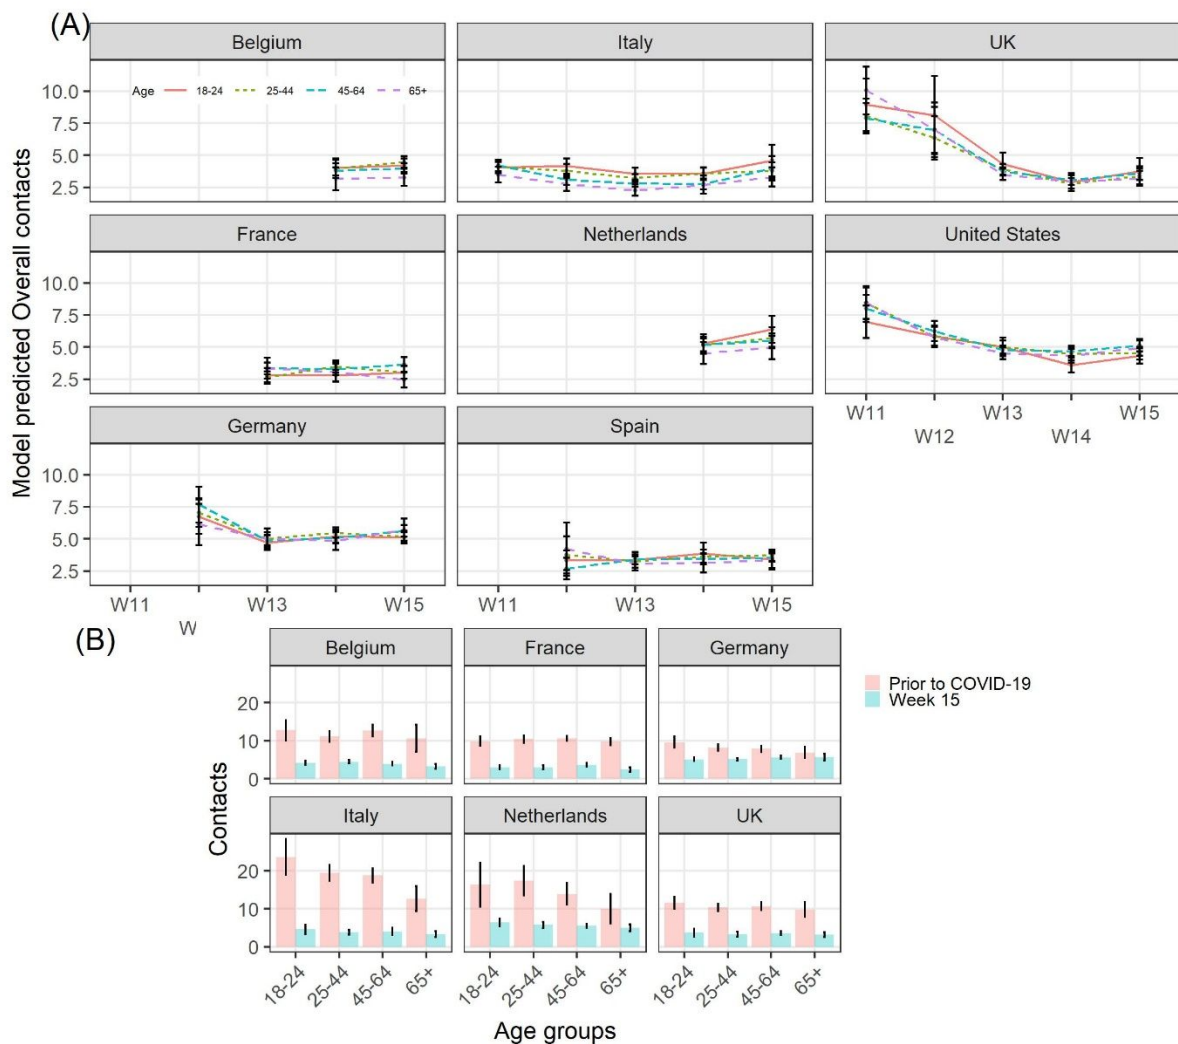

**Figure S10.** Model-predicted daily number of overall social contacts, by age group, country, and week, March-April 2020. (A). Comparison of model-predicted overall contact numbers between the pre-COVID period and calendar week 15, by country (B). Respondents with contacts above the  $\leq 29$  threshold were removed from the analysis.

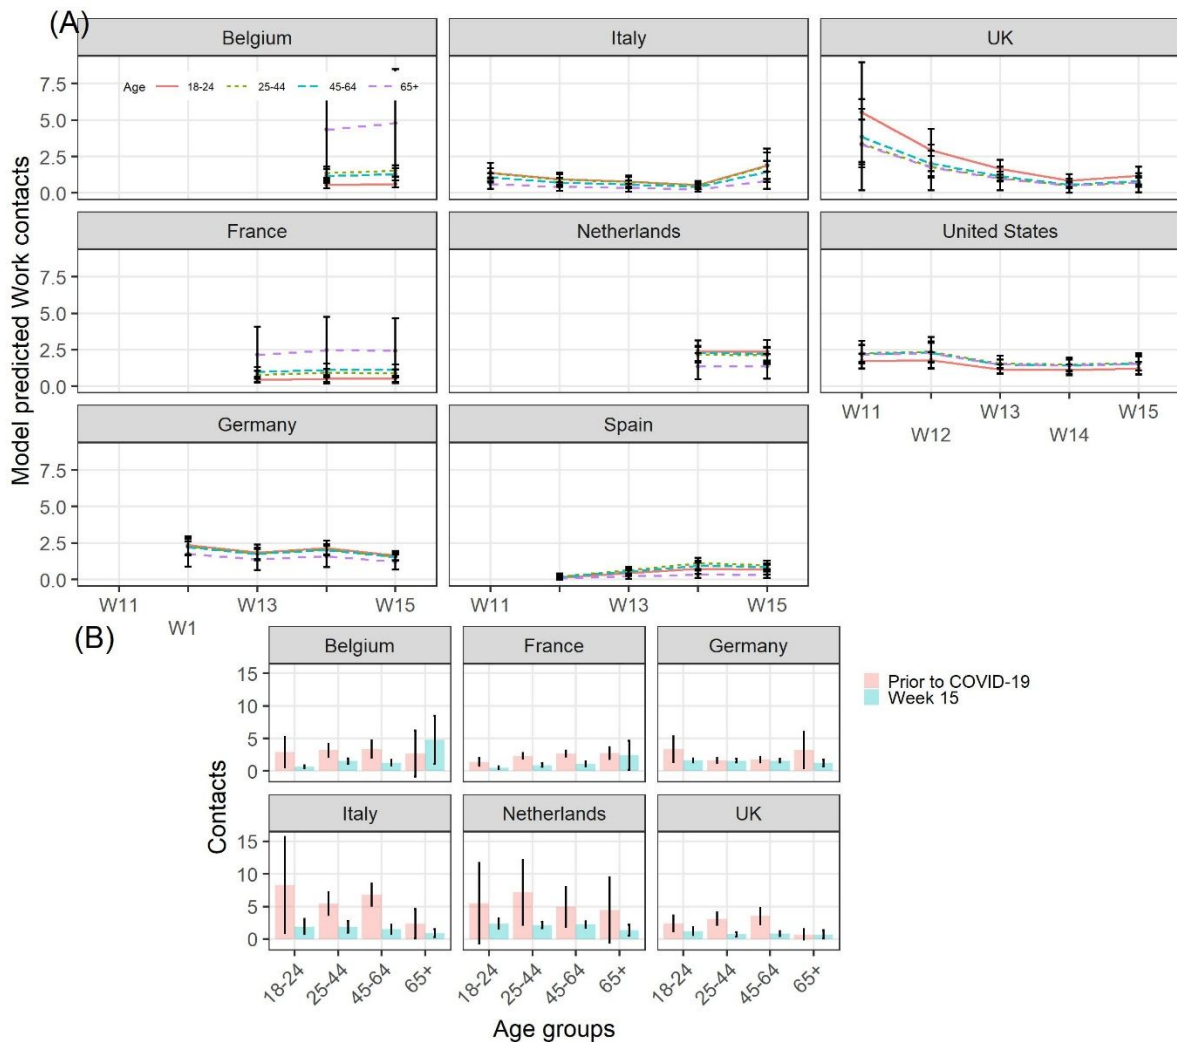

**Figure S11.** Model-predicted daily number of social contacts at work, by age group, country, and week, March-April 2020. (A). Comparison of model-predicted contact numbers at work between the pre-COVID period and calendar week 15, by country (B). Respondents with contacts above the  $\leq 29$  threshold were removed from the analysis.

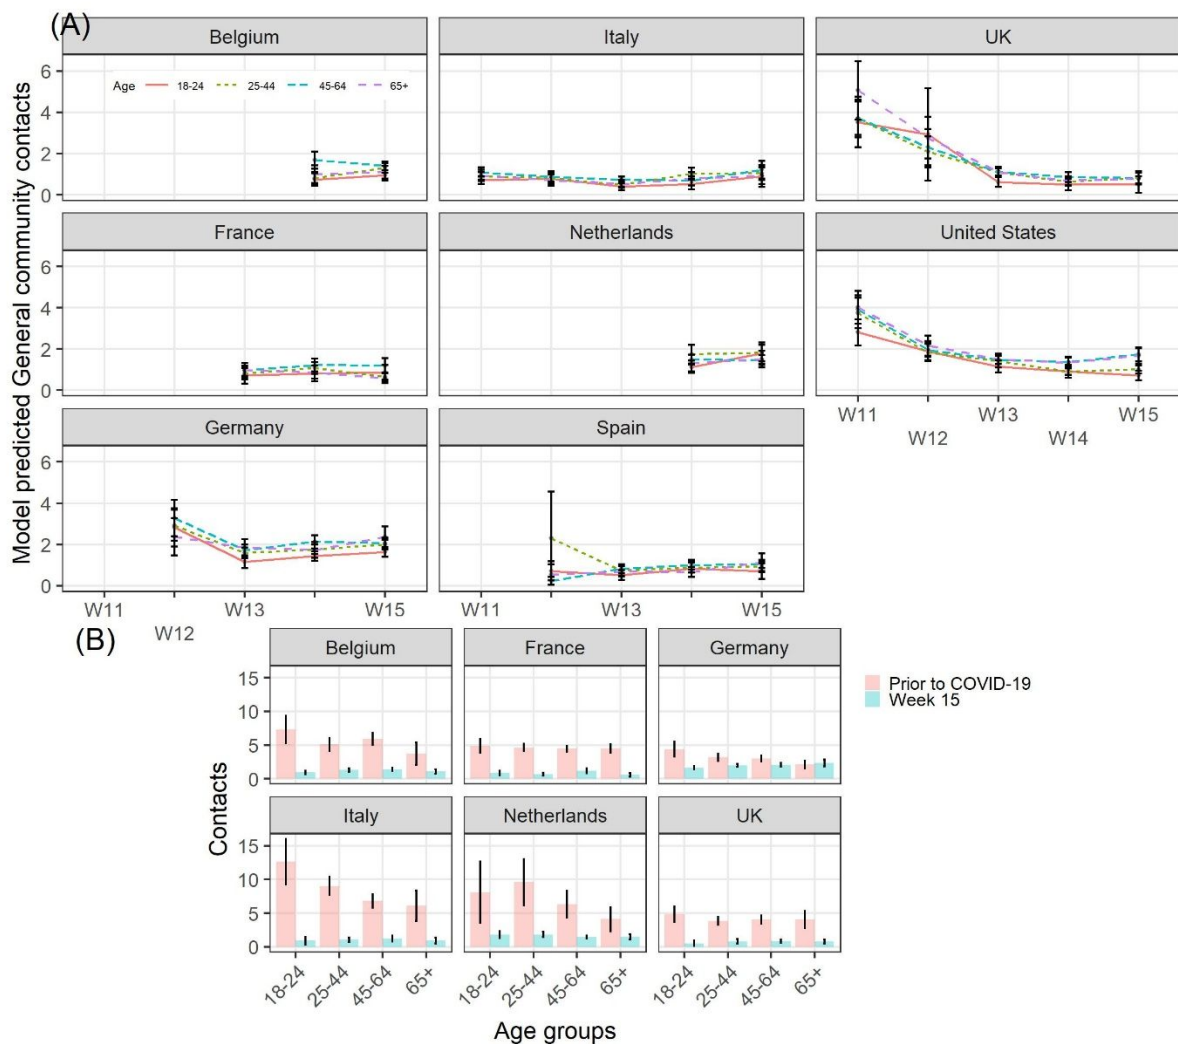

**Figure S12.** Model-predicted daily number of social contacts in the general community, by age group, country, and week, March-April 2020. (A). Comparison of model-predicted contact numbers in the general community between the pre-COVID period and calendar week 15, by country (B). Respondents with contacts above the  $\leq 29$  threshold were removed from the analysis.

Finally, Figure S13 reports on the impact of the reduction of the age-specific social contacts on age mixing and hence on the net reproduction number  $R_t$  on the different study weeks. Results are consistent with those for the 90% quantile threshold, as we found evidence of a reduction of the net reproduction number across the weeks, even though not as much as with the other thresholds. The 95% CIs around the values of the  $R_t$  in Italy, Spain, and in the UK (on week 14) were entirely below zero, as we observed with the 90% quantile threshold too, while in Belgium and France the 95% CI included one (as well as in the Netherlands and the US). For Germany, the  $R_t$  was always above one, as a consequence of the small reduction in social contacts compared to the period prior to COVID-19.

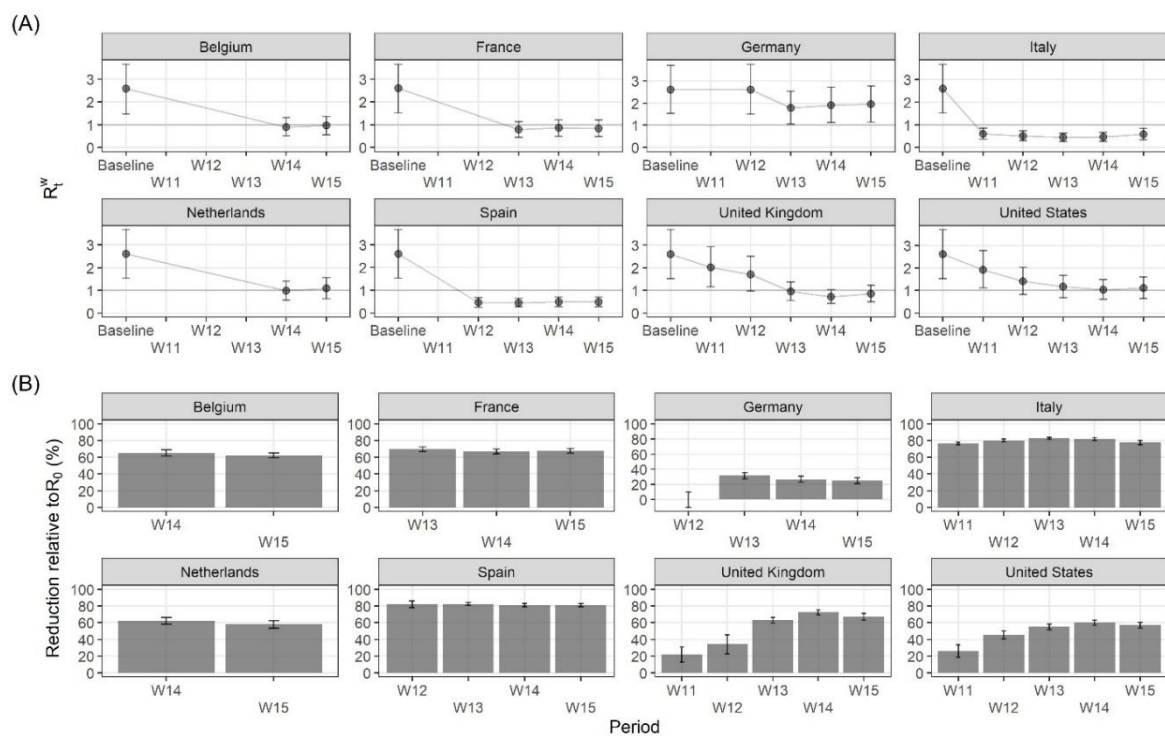

**Figure S13.** Absolute change in the weekly net reproduction number  $R_t^w$  with respect to the basic reproduction number  $R_0$  at baseline (A) and percent reduction with respect to  $R_0$  (B), by country and week. The 95% CIs are based on 5,000 replicates. Respondents with contacts above the  $\leq 29$  threshold were removed from the analysis.



### Association between behavioural change and social contact numbers

Figures S14 – S17 show the exponentiated coefficients of the health behaviours and the feeling of threat from the negative binomial regression model to estimate the overall number of daily contacts by study week, under the two different contact thresholds. For each country and variable, we show the main effect for the association between each variable and the overall number of social contacts, as well as how this association changed across the study weeks.

Two results are worthy to highlight. First, we found some evidence that people living in countries where the use of face masks increased over time reported higher number of social contacts (Figure S14). Such a result was reported for the US (from the end of March till the end of the study period), Italy (at least under the 90% quantile threshold), and Belgium. Second, we found a negative effect of the avoidance of social activities on social contact numbers in the Netherlands, the UK, and the US, where at the beginning only milder non-pharmaceutical interventions were implemented, with no obligation of avoiding social activities (Figure S15).

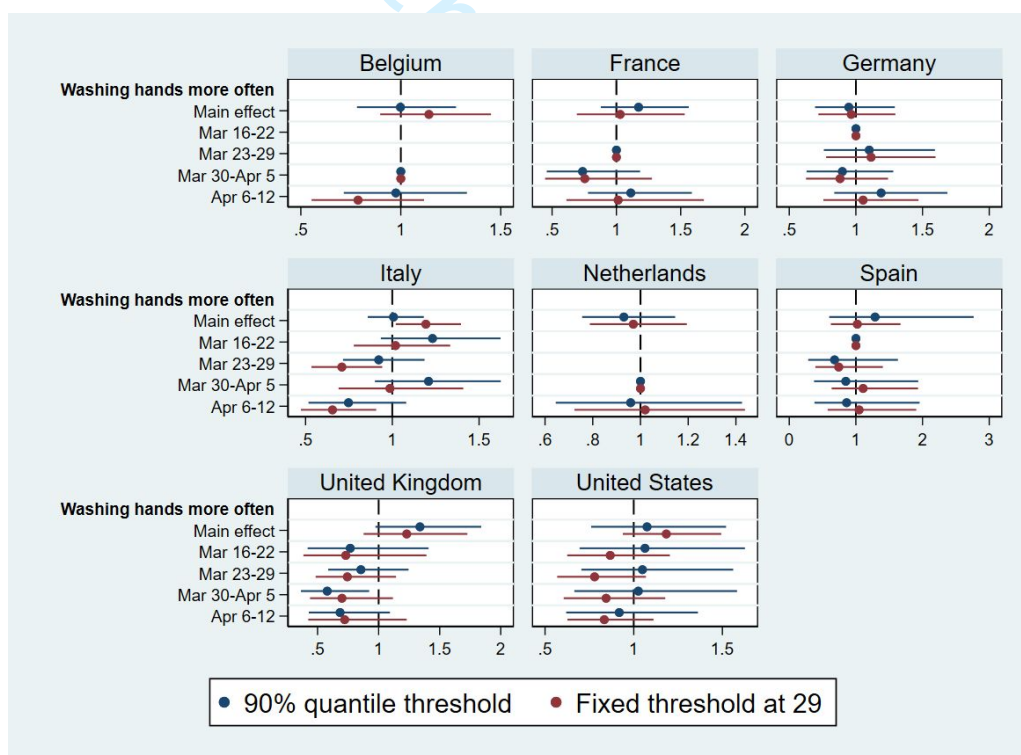

**Figure S14.** Effect of washing hand more often on overall contacts by study week. Exponentiated coefficients for the protective action “Washing hands more often”, measuring the association between the action and the overall number of social contacts across study weeks. Results for both contact thresholds are shown.

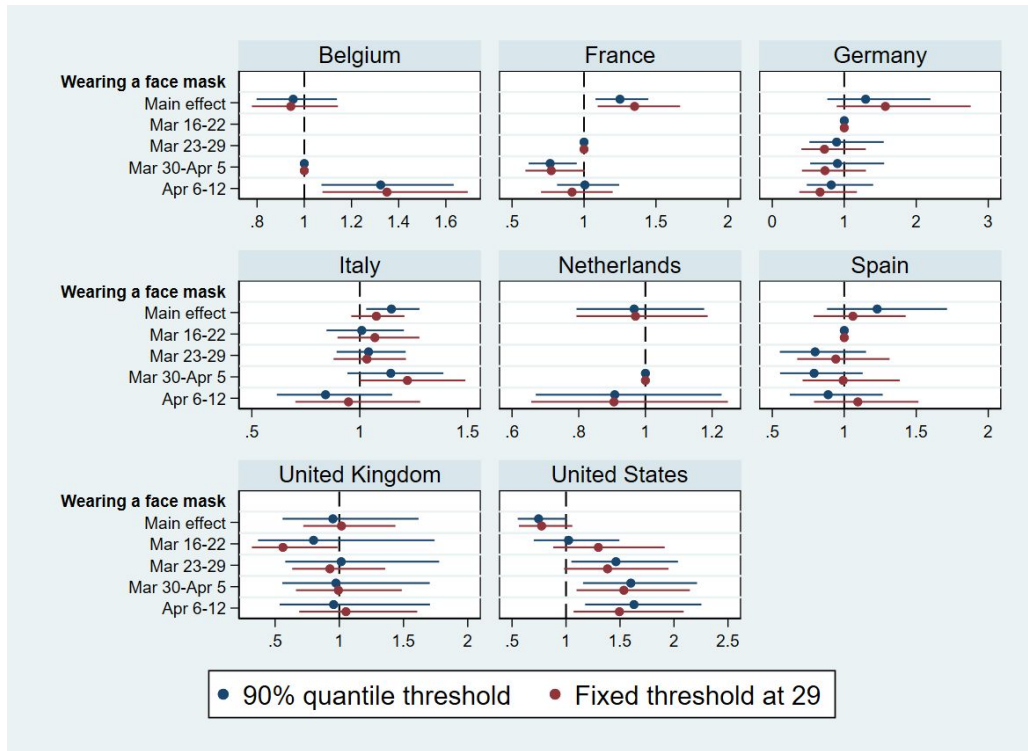

**Figure S15.** Effect of wearing a face mask on overall contacts by study week. Exponentiated coefficients for the protective action “Wearing a face mask”, measuring the association between the action and the overall number of social contacts across study weeks. Results for both contact thresholds are shown.

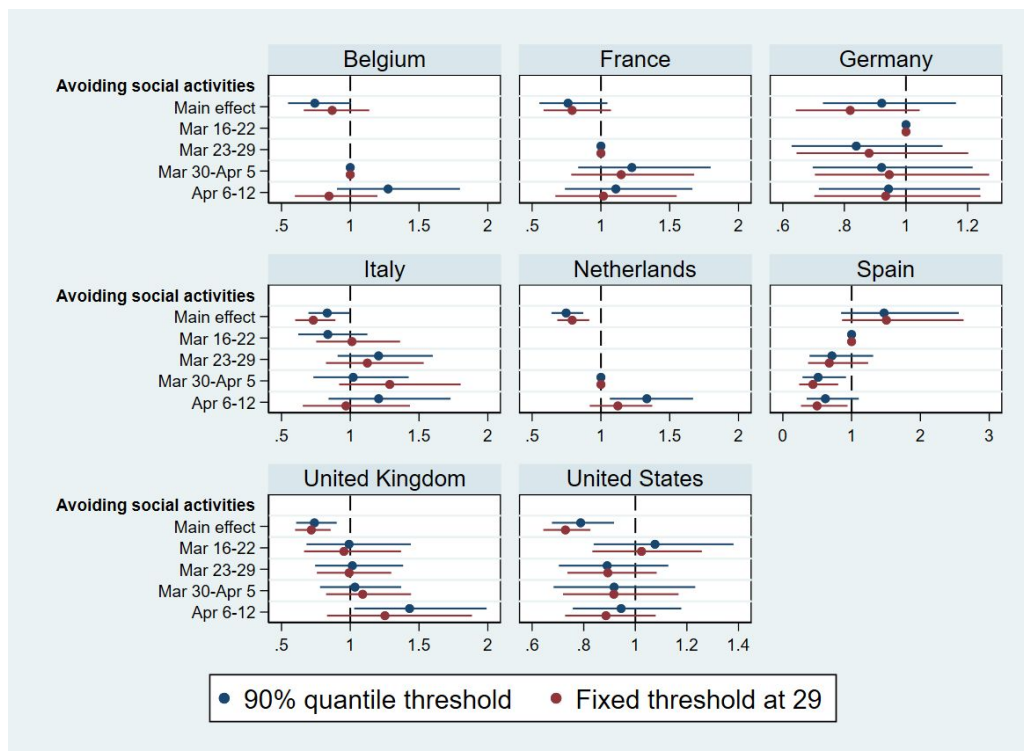

**Figure S16.** Effect of avoiding social activities on overall contacts by study week. Exponentiated coefficients for the protective action “Avoiding social activities”, measuring the association between the action and the overall number of social contacts across study weeks. Results for both contact thresholds are shown.

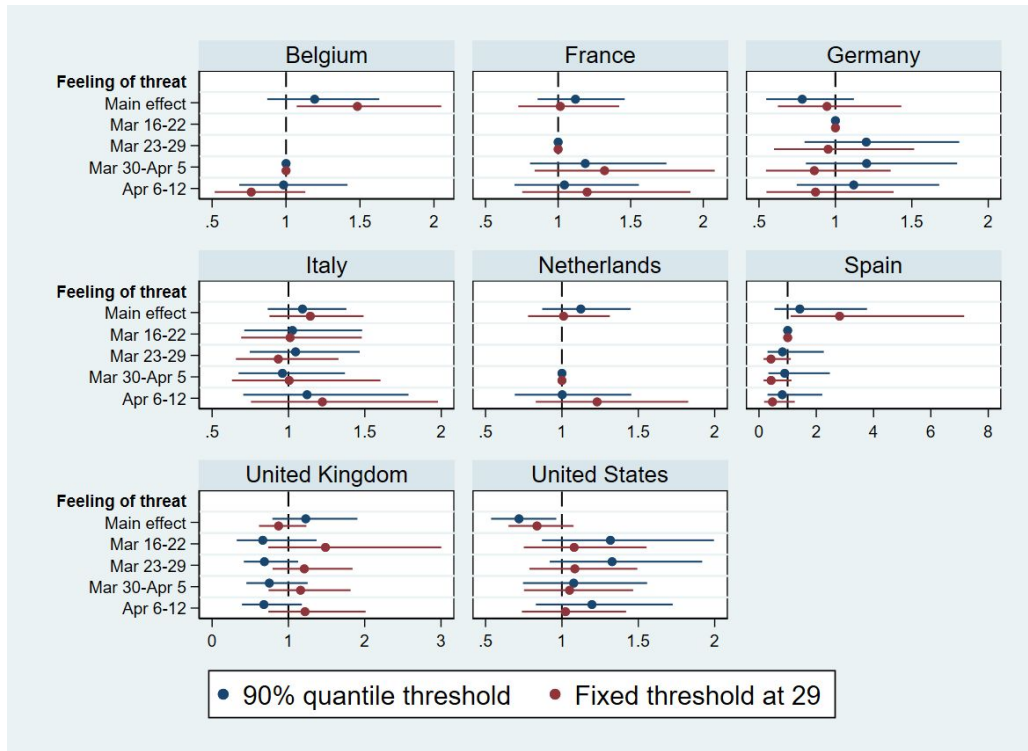

**Figure S17.** Effect of the feeling of threat to oneself and to family on overall contacts by study week. Exponentiated coefficients for the feeling of threat posed by COVID-19 to oneself and the family, measuring the association between the action and the overall number of social contacts across study weeks. Results for both contact thresholds are shown.

## References

- 1 Perrotta D, Grow A, Rampazzo F, *et al.* Behaviors and attitudes in response to the COVID-19 pandemic: Insights from a cross-national Facebook survey. *medRxiv* 2020;:2020.05.09.20096388. doi:10.1101/2020.05.09.20096388
- 2 Eurostat, Statistical Office of the European Union. *Eurostat regional yearbook: 2019 edition*. 2019. [http://publications.europa.eu/publication/manifestation\\_identifier/PUB\\_KSHA19001ENN](http://publications.europa.eu/publication/manifestation_identifier/PUB_KSHA19001ENN) (accessed 15 May 2020).
- 3 Ipsos. Public Opinion on the Coronavirus outbreak: a multi-country poll from Ipsos. 2020. <https://www.ipsos.com/en/coronavirus-public-opinion> (accessed 15 May 2020).
- 4 Pötzschke S, Braun M. Migrant Sampling Using Facebook Advertisements: A Case Study of Polish Migrants in Four European Countries. *Soc Sci Comput Rev* 2016;**35**:633–53. doi:10.1177/0894439316666262
- 5 Hoffman Pham K, Rampazzo F, Rosenzweig LR. Online Surveys and Digital Demography in the Developing World: Facebook Users in Kenya. *ArXiv191003448 Cs* Published Online First: 8 October 2019. <http://arxiv.org/abs/1910.03448> (accessed 1 Dec 2019).
- 6 Zhang B, Mildenerger M, Howe PD, *et al.* Quota sampling using Facebook advertisements. *Polit Sci Res Methods* 2018;:1–7. doi:10.1017/psrm.2018.49
- 7 Keiding N, Louis TA. Perils and potentials of self-selected entry to epidemiological studies and surveys. *J R Stat Soc Ser A Stat Soc* 2016;**179**:319–76. doi:10.1111/rssa.12136
- 8 Mercer AW, Kreuter F, Keeter S, *et al.* Theory and Practice in Nonprobability Surveys Parallels between Causal Inference and Survey Inference. *Public Opin Q* 2017;**81**:250–71. doi:10.1093/poq/nfw060
- 9 US Census Bureau. 2018 Population Estimates by Age, Sex, Race and Hispanic Origin. U. S. Census Bur. <https://www.census.gov/newsroom/press-kits/2019/detailed-estimates.html> (accessed 15 May 2020).
- 10 Mossong J, Hens N, Jit M, *et al.* Social Contacts and Mixing Patterns Relevant to the Spread of Infectious Diseases. *PLoS Med* 2008;**5**:e74. doi:10.1371/journal.pmed.0050074
- 11 Béraud G, Kazmerczak S, Beutels P, *et al.* The French Connection: The First Large Population-Based Contact Survey in France Relevant for the Spread of Infectious Diseases. *PLoS ONE* 2015;**10**:e0133203. doi:10.1371/journal.pone.0133203
- 12 Teslya A, Pham TM, Godijk NG, *et al.* Impact of self-imposed prevention measures and short-term government-imposed social distancing on mitigating and delaying a COVID-19 epidemic: A modelling study. *PLoS Med* 2020;**17**:e1003166. doi:10.1371/journal.pmed.1003166
- 13 Chu DK, Akl EA, Duda S, *et al.* Physical distancing, face masks, and eye protection to prevent person-to-person transmission of SARS-CoV-2 and COVID-19: a systematic review and meta-analysis. *The Lancet* 2020;**395**:1973–87. doi:10.1016/S0140-6736(20)31142-9

- 1  
2  
3 14 Diekmann O, Heesterbeek JAP, Metz JAJ. On the definition and the computation of the basic  
4 reproduction ratio  $R_0$  in models for infectious diseases in heterogeneous populations. *J Math Biol*  
5 1990;**28**:365–82. doi:10.1007/BF00178324  
6
- 7 15 Wallinga J, Teunis P, Kretzschmar M. Using Data on Social Contacts to Estimate Age-specific  
8 Transmission Parameters for Respiratory-spread Infectious Agents. *Am J Epidemiol* 2006;**164**:936–  
9 44. doi:10.1093/aje/kwj317  
10
- 11 16 Coletti P, Wambua J, Gimma A, *et al.* CoMix: comparing mixing patterns in the Belgian population  
12 during and after lockdown. *Sci Rep* 2020;**10**:21885. doi:10.1038/s41598-020-78540-7  
13
- 14 17 Feehan DM, Mahmud AS. Quantifying population contact patterns in the United States during the  
15 COVID-19 pandemic. *Nat Commun* 2021;**12**:893. doi:10.1038/s41467-021-20990-2  
16
- 17 18 Jarvis CI, Van Zandvoort K, Gimma A, *et al.* Quantifying the impact of physical distance measures on  
18 the transmission of COVID-19 in the UK. *BMC Med* 2020;**18**:124. doi:10.1186/s12916-020-01597-8  
19
- 20 19 Klepac P, Kucharski AJ, Conlan AJ, *et al.* Contacts in context: large-scale setting-specific social  
21 mixing matrices from the BBC Pandemic project. *medRxiv* 2020;:2020.02.16.20023754.  
22 doi:10.1101/2020.02.16.20023754  
23
- 24 20 Arregui S, Aleta A, Sanz J, *et al.* Projecting social contact matrices to different demographic  
25 structures. *PLoS Comput Biol* 2018;**14**:e1006638. doi:10.1371/journal.pcbi.1006638  
26
- 27 21 WHO. Transmission of SARS-CoV-2: implications for infection prevention precautions.  
28 2020. [https://www.who.int/news-room/commentaries/detail/transmission-of-sars-cov-2-implications-](https://www.who.int/news-room/commentaries/detail/transmission-of-sars-cov-2-implications-for-infection-prevention-precautions)  
29 [for-infection-prevention-precautions](https://www.who.int/news-room/commentaries/detail/transmission-of-sars-cov-2-implications-for-infection-prevention-precautions) (accessed 24 Aug 2020).  
30  
31
- 32 22 Quinn K. Social media and social wellbeing in later life. *Ageing Soc* 2019;:1–22.  
33 doi:10.1017/S0144686X19001570  
34  
35  
36  
37  
38  
39  
40  
41  
42  
43  
44  
45  
46  
47  
48  
49  
50  
51  
52  
53  
54  
55  
56  
57  
58  
59  
60

|    | threshold | country | week    | setting | region       | sex | age | contacts   | contacts_sc |
|----|-----------|---------|---------|---------|--------------|-----|-----|------------|-------------|
| 1  |           |         |         |         |              |     |     |            |             |
| 2  |           |         |         |         |              |     |     |            |             |
| 3  |           |         |         |         |              |     |     |            |             |
| 4  |           | 1 BE    | 2020-14 |         | 1 BE-Brussel |     | 1   | 1 3.361378 | #####       |
| 5  |           | 1 BE    | 2020-14 |         | 1 BE-Brussel |     | 1   | 2 2.883718 | #####       |
| 6  |           | 1 BE    | 2020-14 |         | 1 BE-Brussel |     | 1   | 3 3.993247 | #####       |
| 7  |           | 1 BE    | 2020-14 |         | 1 BE-Brussel |     | 1   | 4 4.098381 | 1.270505    |
| 8  |           | 1 BE    | 2020-14 |         | 1 BE-Brussel |     | 1   | 5 1.704648 | #####       |
| 9  |           | 1 BE    | 2020-14 |         | 1 BE-Brussel |     | 2   | 1 3.249152 | #####       |
| 10 |           | 1 BE    | 2020-14 |         | 1 BE-Brussel |     | 2   | 2 3.607143 | #####       |
| 11 |           | 1 BE    | 2020-14 |         | 1 BE-Brussel |     | 2   | 3 3.113636 | #####       |
| 12 |           | 1 BE    | 2020-14 |         | 1 BE-Brussel |     | 2   | 4 4.297297 | 1.032743    |
| 13 |           | 1 BE    | 2020-14 |         | 1 BE-Brussel |     | 2   | 5 1.73913  | #####       |
| 14 |           | 1 BE    | 2020-14 |         | 1 BE-Brussel |     | 3   | 1 3.560396 | 1.247473    |
| 15 |           | 1 BE    | 2020-14 |         | 1 BE-Brussel |     | 3   | 2 0.5      | #####       |
| 16 |           | 1 BE    | 2020-14 |         | 1 BE-Brussel |     | 3   | 3 5.636364 | 2.490885    |
| 17 |           | 1 BE    | 2020-14 |         | 1 BE-Brussel |     | 3   | 4 3.75     | 2.989092    |
| 18 |           | 1 BE    | 2020-14 |         | 1 BE-Brussel |     | 3   | 5 1.666667 | #####       |
| 19 |           | 1 BE    | 2020-14 |         | 1 BE-Flander |     | 1   | 1 4.231946 | #####       |
| 20 |           | 1 BE    | 2020-14 |         | 1 BE-Flander |     | 1   | 2 5.027411 | #####       |
| 21 |           | 1 BE    | 2020-14 |         | 1 BE-Flander |     | 1   | 3 6.067168 | #####       |
| 22 |           | 1 BE    | 2020-14 |         | 1 BE-Flander |     | 1   | 4 3.945484 | #####       |
| 23 |           | 1 BE    | 2020-14 |         | 1 BE-Flander |     | 1   | 5 2.134634 | #####       |
| 24 |           | 1 BE    | 2020-14 |         | 1 BE-Flander |     | 2   | 1 3.962952 | #####       |
| 25 |           | 1 BE    | 2020-14 |         | 1 BE-Flander |     | 2   | 2 5.511628 | #####       |
| 26 |           | 1 BE    | 2020-14 |         | 1 BE-Flander |     | 2   | 3 5.421053 | 1.08615     |
| 27 |           | 1 BE    | 2020-14 |         | 1 BE-Flander |     | 2   | 4 4.070313 | #####       |
| 28 |           | 1 BE    | 2020-14 |         | 1 BE-Flander |     | 2   | 5 2.134328 | #####       |
| 29 |           | 1 BE    | 2020-14 |         | 1 BE-Flander |     | 3   | 1 4.53081  | #####       |
| 30 |           | 1 BE    | 2020-14 |         | 1 BE-Flander |     | 3   | 2 4.571429 | #####       |
| 31 |           | 1 BE    | 2020-14 |         | 1 BE-Flander |     | 3   | 3 6.484848 | 1.39618     |
| 32 |           | 1 BE    | 2020-14 |         | 1 BE-Flander |     | 3   | 4 3.769231 | #####       |
| 33 |           | 1 BE    | 2020-14 |         | 1 BE-Flander |     | 3   | 5 2.135135 | #####       |
| 34 |           | 1 BE    | 2020-14 |         | 1 BE-Overall |     | 1   | 1 3.863047 | #####       |
| 35 |           | 1 BE    | 2020-14 |         | 1 BE-Overall |     | 1   | 2 4.114565 | #####       |
| 36 |           | 1 BE    | 2020-14 |         | 1 BE-Overall |     | 1   | 3 5.137369 | #####       |
| 37 |           | 1 BE    | 2020-14 |         | 1 BE-Overall |     | 1   | 4 3.861355 | #####       |
| 38 |           | 1 BE    | 2020-14 |         | 1 BE-Overall |     | 1   | 5 1.969285 | #####       |
| 39 |           | 1 BE    | 2020-14 |         | 1 BE-Overall |     | 2   | 1 3.742842 | #####       |
| 40 |           | 1 BE    | 2020-14 |         | 1 BE-Overall |     | 2   | 2 4.370955 | #####       |
| 41 |           | 1 BE    | 2020-14 |         | 1 BE-Overall |     | 2   | 3 4.715822 | #####       |
| 42 |           | 1 BE    | 2020-14 |         | 1 BE-Overall |     | 2   | 4 4.101939 | #####       |
| 43 |           | 1 BE    | 2020-14 |         | 1 BE-Overall |     | 2   | 5 1.954836 | #####       |
| 44 |           | 1 BE    | 2020-14 |         | 1 BE-Overall |     | 3   | 1 4.012136 | #####       |
| 45 |           | 1 BE    | 2020-14 |         | 1 BE-Overall |     | 3   | 2 3.818593 | #####       |
| 46 |           | 1 BE    | 2020-14 |         | 1 BE-Overall |     | 3   | 3 5.516491 | #####       |
| 47 |           | 1 BE    | 2020-14 |         | 1 BE-Overall |     | 3   | 4 3.531002 | #####       |
| 48 |           | 1 BE    | 2020-14 |         | 1 BE-Overall |     | 3   | 5 1.995138 | #####       |
| 49 |           | 1 BE    | 2020-14 |         | 1 BE-Walloni |     | 1   | 1 3.377199 | #####       |
| 50 |           | 1 BE    | 2020-14 |         | 1 BE-Walloni |     | 1   | 2 3.35848  | #####       |
| 51 |           | 1 BE    | 2020-14 |         | 1 BE-Walloni |     | 1   | 3 4.158046 | #####       |
| 52 |           | 1 BE    | 2020-14 |         | 1 BE-Walloni |     | 1   | 4 3.635033 | #####       |
| 53 |           | 1 BE    | 2020-14 |         | 1 BE-Walloni |     | 1   | 5 1.666723 | #####       |
| 54 |           | 1 BE    | 2020-14 |         | 1 BE-Walloni |     | 2   | 1 3.553788 | #####       |
| 55 |           | 1 BE    | 2020-14 |         | 1 BE-Walloni |     | 2   | 2 3.47561  | #####       |
| 56 |           | 1 BE    | 2020-14 |         | 1 BE-Walloni |     | 2   | 3 4.619048 | #####       |
| 57 |           | 1 BE    | 2020-14 |         | 1 BE-Walloni |     | 2   | 4 4.115385 | #####       |
| 58 |           | 1 BE    | 2020-14 |         | 1 BE-Walloni |     | 2   | 5 1.645833 | #####       |
| 59 |           | 1 BE    | 2020-14 |         | 1 BE-Walloni |     | 2   |            |             |
| 60 |           | 1 BE    | 2020-14 |         | 1 BE-Walloni |     | 2   |            |             |

1  
2  
3  
4  
5  
6  
7  
8  
9  
10  
11  
12  
13  
14  
15  
16  
17  
18  
19  
20  
21  
22  
23  
24  
25  
26  
27  
28  
29  
30  
31  
32  
33  
34  
35  
36  
37  
38  
39  
40  
41  
42  
43  
44  
45  
46  
47  
48  
49  
50  
51  
52  
53  
54  
55  
56  
57  
58  
59  
60

|      |         |              |   |   |          |       |
|------|---------|--------------|---|---|----------|-------|
| 1 BE | 2020-14 | 1 BE-Walloni | 3 | 1 | 3.137104 | ##### |
| 1 BE | 2020-14 | 1 BE-Walloni | 3 | 2 | 3.217391 | ##### |
| 1 BE | 2020-14 | 1 BE-Walloni | 3 | 3 | 3.634146 | ##### |
| 1 BE | 2020-14 | 1 BE-Walloni | 3 | 4 | 3.045455 | ##### |
| 1 BE | 2020-14 | 1 BE-Walloni | 3 | 5 | 1.722222 | ##### |
| 1 BE | 2020-14 | 2 BE-Brussel | 1 | 1 | 1.365191 | ##### |
| 1 BE | 2020-14 | 2 BE-Brussel | 1 | 2 | 1.846753 | ##### |
| 1 BE | 2020-14 | 2 BE-Brussel | 1 | 3 | 1.631361 | ##### |
| 1 BE | 2020-14 | 2 BE-Brussel | 1 | 4 | 1.045394 | ##### |
| 1 BE | 2020-14 | 2 BE-Brussel | 1 | 5 | #####    | ##### |
| 1 BE | 2020-14 | 2 BE-Brussel | 2 | 1 | 1.648825 | ##### |
| 1 BE | 2020-14 | 2 BE-Brussel | 2 | 2 | 2.241379 | ##### |
| 1 BE | 2020-14 | 2 BE-Brussel | 2 | 3 | 1.866667 | ##### |
| 1 BE | 2020-14 | 2 BE-Brussel | 2 | 4 | 1.216216 | ##### |
| 1 BE | 2020-14 | 2 BE-Brussel | 2 | 5 | 1.043478 | ##### |
| 1 BE | 2020-14 | 2 BE-Brussel | 3 | 1 | #####    | ##### |
| 1 BE | 2020-14 | 2 BE-Brussel | 3 | 2 | 0.5      | ##### |
| 1 BE | 2020-14 | 2 BE-Brussel | 3 | 3 | 1.181818 | ##### |
| 1 BE | 2020-14 | 2 BE-Brussel | 3 | 4 | #####    | ##### |
| 1 BE | 2020-14 | 2 BE-Brussel | 3 | 5 | #####    | ##### |
| 1 BE | 2020-14 | 2 BE-Flander | 1 | 1 | 1.586805 | ##### |
| 1 BE | 2020-14 | 2 BE-Flander | 1 | 2 | 2.759968 | ##### |
| 1 BE | 2020-14 | 2 BE-Flander | 1 | 3 | 1.907265 | ##### |
| 1 BE | 2020-14 | 2 BE-Flander | 1 | 4 | 1.467098 | ##### |
| 1 BE | 2020-14 | 2 BE-Flander | 1 | 5 | #####    | ##### |
| 1 BE | 2020-14 | 2 BE-Flander | 2 | 1 | 1.531248 | ##### |
| 1 BE | 2020-14 | 2 BE-Flander | 2 | 2 | 2.717391 | ##### |
| 1 BE | 2020-14 | 2 BE-Flander | 2 | 3 | 1.984375 | ##### |
| 1 BE | 2020-14 | 2 BE-Flander | 2 | 4 | 1.496241 | ##### |
| 1 BE | 2020-14 | 2 BE-Flander | 2 | 5 | #####    | ##### |
| 1 BE | 2020-14 | 2 BE-Flander | 3 | 1 | 1.649481 | ##### |
| 1 BE | 2020-14 | 2 BE-Flander | 3 | 2 | 2.8      | ##### |
| 1 BE | 2020-14 | 2 BE-Flander | 3 | 3 | 1.852941 | ##### |
| 1 BE | 2020-14 | 2 BE-Flander | 3 | 4 | 1.425926 | ##### |
| 1 BE | 2020-14 | 2 BE-Flander | 3 | 5 | #####    | ##### |
| 1 BE | 2020-14 | 2 BE-Overall | 1 | 1 | 1.568709 | ##### |
| 1 BE | 2020-14 | 2 BE-Overall | 1 | 2 | 2.495231 | ##### |
| 1 BE | 2020-14 | 2 BE-Overall | 1 | 3 | 1.809656 | ##### |
| 1 BE | 2020-14 | 2 BE-Overall | 1 | 4 | 1.405366 | ##### |
| 1 BE | 2020-14 | 2 BE-Overall | 1 | 5 | #####    | ##### |
| 1 BE | 2020-14 | 2 BE-Overall | 2 | 1 | 1.606069 | ##### |
| 1 BE | 2020-14 | 2 BE-Overall | 2 | 2 | 2.536102 | ##### |
| 1 BE | 2020-14 | 2 BE-Overall | 2 | 3 | 1.960897 | ##### |
| 1 BE | 2020-14 | 2 BE-Overall | 2 | 4 | 1.504357 | ##### |
| 1 BE | 2020-14 | 2 BE-Overall | 2 | 5 | #####    | ##### |
| 1 BE | 2020-14 | 2 BE-Overall | 3 | 1 | 1.521893 | ##### |
| 1 BE | 2020-14 | 2 BE-Overall | 3 | 2 | 2.447459 | ##### |
| 1 BE | 2020-14 | 2 BE-Overall | 3 | 3 | 1.669056 | ##### |
| 1 BE | 2020-14 | 2 BE-Overall | 3 | 4 | 1.26802  | ##### |
| 1 BE | 2020-14 | 2 BE-Overall | 3 | 5 | #####    | ##### |
| 1 BE | 2020-14 | 2 BE-Walloni | 1 | 1 | 1.593612 | ##### |
| 1 BE | 2020-14 | 2 BE-Walloni | 1 | 2 | 2.319054 | ##### |
| 1 BE | 2020-14 | 2 BE-Walloni | 1 | 3 | 1.721406 | ##### |
| 1 BE | 2020-14 | 2 BE-Walloni | 1 | 4 | 1.366424 | ##### |
| 1 BE | 2020-14 | 2 BE-Walloni | 1 | 5 | #####    | ##### |
| 1 BE | 2020-14 | 2 BE-Walloni | 2 | 1 | 1.710964 | ##### |



|    |      |         |              |   |   |          |       |  |
|----|------|---------|--------------|---|---|----------|-------|--|
| 1  |      |         |              |   |   |          |       |  |
| 2  |      |         |              |   |   |          |       |  |
| 3  | 1 BE | 2020-14 | 2 BE-Walloni | 2 | 2 | 2.435294 | ##### |  |
| 4  | 1 BE | 2020-14 | 2 BE-Walloni | 2 | 3 | 1.972222 | ##### |  |
| 5  | 1 BE | 2020-14 | 2 BE-Walloni | 2 | 4 | 1.597561 | ##### |  |
| 6  | 1 BE | 2020-14 | 2 BE-Walloni | 2 | 5 | 0.8125   | ##### |  |
| 7  | 1 BE | 2020-14 | 2 BE-Walloni | 3 | 1 | 1.432116 | ##### |  |
| 8  | 1 BE | 2020-14 | 2 BE-Walloni | 3 | 2 | 2.173913 | ##### |  |
| 9  | 1 BE | 2020-14 | 2 BE-Walloni | 3 | 3 | 1.44186  | ##### |  |
| 10 | 1 BE | 2020-14 | 2 BE-Walloni | 3 | 4 | 1.068182 | ##### |  |
| 11 | 1 BE | 2020-14 | 2 BE-Walloni | 3 | 5 | #####    | ##### |  |
| 12 | 1 BE | 2020-14 | 3 BE-Brussel | 1 | 1 | #####    | ##### |  |
| 13 | 1 BE | 2020-14 | 3 BE-Brussel | 1 | 2 | 0        | 0     |  |
| 14 | 1 BE | 2020-14 | 3 BE-Brussel | 1 | 3 | 0        | 0     |  |
| 15 | 1 BE | 2020-14 | 3 BE-Brussel | 1 | 4 | #####    | ##### |  |
| 16 | 1 BE | 2020-14 | 3 BE-Brussel | 1 | 5 | 0        | 0     |  |
| 17 | 1 BE | 2020-14 | 3 BE-Brussel | 2 | 1 | #####    | ##### |  |
| 18 | 1 BE | 2020-14 | 3 BE-Brussel | 2 | 2 | 0        | 0     |  |
| 19 | 1 BE | 2020-14 | 3 BE-Brussel | 2 | 3 | 0        | 0     |  |
| 20 | 1 BE | 2020-14 | 3 BE-Brussel | 2 | 4 | #####    | ##### |  |
| 21 | 1 BE | 2020-14 | 3 BE-Brussel | 2 | 5 | 0        | 0     |  |
| 22 | 1 BE | 2020-14 | 3 BE-Brussel | 3 | 1 | 0        | 0     |  |
| 23 | 1 BE | 2020-14 | 3 BE-Brussel | 3 | 2 | 0        | 0     |  |
| 24 | 1 BE | 2020-14 | 3 BE-Brussel | 3 | 3 | 0        | 0     |  |
| 25 | 1 BE | 2020-14 | 3 BE-Brussel | 3 | 4 | 0        | 0     |  |
| 26 | 1 BE | 2020-14 | 3 BE-Brussel | 3 | 5 | 0        | 0     |  |
| 27 | 1 BE | 2020-14 | 3 BE-Brussel | 3 | 5 | 0        | 0     |  |
| 28 | 1 BE | 2020-14 | 3 BE-Flander | 1 | 1 | #####    | ##### |  |
| 29 | 1 BE | 2020-14 | 3 BE-Flander | 1 | 2 | 0        | 0     |  |
| 30 | 1 BE | 2020-14 | 3 BE-Flander | 1 | 3 | #####    | ##### |  |
| 31 | 1 BE | 2020-14 | 3 BE-Flander | 1 | 4 | #####    | ##### |  |
| 32 | 1 BE | 2020-14 | 3 BE-Flander | 1 | 5 | #####    | ##### |  |
| 33 | 1 BE | 2020-14 | 3 BE-Flander | 2 | 1 | #####    | ##### |  |
| 34 | 1 BE | 2020-14 | 3 BE-Flander | 2 | 2 | 0        | 0     |  |
| 35 | 1 BE | 2020-14 | 3 BE-Flander | 2 | 3 | 0.078125 | ##### |  |
| 36 | 1 BE | 2020-14 | 3 BE-Flander | 2 | 4 | #####    | ##### |  |
| 37 | 1 BE | 2020-14 | 3 BE-Flander | 2 | 5 | #####    | ##### |  |
| 38 | 1 BE | 2020-14 | 3 BE-Flander | 3 | 1 | #####    | ##### |  |
| 39 | 1 BE | 2020-14 | 3 BE-Flander | 3 | 2 | 0        | 0     |  |
| 40 | 1 BE | 2020-14 | 3 BE-Flander | 3 | 3 | 0.5      | ##### |  |
| 41 | 1 BE | 2020-14 | 3 BE-Flander | 3 | 4 | 0        | 0     |  |
| 42 | 1 BE | 2020-14 | 3 BE-Flander | 3 | 5 | #####    | ##### |  |
| 43 | 1 BE | 2020-14 | 3 BE-Overall | 1 | 1 | #####    | ##### |  |
| 44 | 1 BE | 2020-14 | 3 BE-Overall | 1 | 2 | 0        | 0     |  |
| 45 | 1 BE | 2020-14 | 3 BE-Overall | 1 | 3 | #####    | ##### |  |
| 46 | 1 BE | 2020-14 | 3 BE-Overall | 1 | 4 | #####    | ##### |  |
| 47 | 1 BE | 2020-14 | 3 BE-Overall | 1 | 5 | #####    | ##### |  |
| 48 | 1 BE | 2020-14 | 3 BE-Overall | 2 | 1 | #####    | ##### |  |
| 49 | 1 BE | 2020-14 | 3 BE-Overall | 2 | 2 | 0        | 0     |  |
| 50 | 1 BE | 2020-14 | 3 BE-Overall | 2 | 3 | #####    | ##### |  |
| 51 | 1 BE | 2020-14 | 3 BE-Overall | 2 | 4 | #####    | ##### |  |
| 52 | 1 BE | 2020-14 | 3 BE-Overall | 2 | 5 | #####    | ##### |  |
| 53 | 1 BE | 2020-14 | 3 BE-Overall | 3 | 1 | #####    | ##### |  |
| 54 | 1 BE | 2020-14 | 3 BE-Overall | 3 | 2 | 0        | 0     |  |
| 55 | 1 BE | 2020-14 | 3 BE-Overall | 3 | 3 | #####    | ##### |  |
| 56 | 1 BE | 2020-14 | 3 BE-Overall | 3 | 4 | 0        | 0     |  |
| 57 | 1 BE | 2020-14 | 3 BE-Overall | 3 | 5 | #####    | ##### |  |
| 58 | 1 BE | 2020-14 | 3 BE-Overall | 3 | 5 | #####    | ##### |  |
| 59 | 1 BE | 2020-14 | 3 BE-Walloni | 1 | 1 | #####    | ##### |  |
| 60 | 1 BE | 2020-14 | 3 BE-Walloni | 1 | 2 | 0        | 0     |  |

|    |      |         |              |   |   |          |          |  |
|----|------|---------|--------------|---|---|----------|----------|--|
| 1  |      |         |              |   |   |          |          |  |
| 2  |      |         |              |   |   |          |          |  |
| 3  | 1 BE | 2020-14 | 3 BE-Walloni | 1 | 3 | #####    | #####    |  |
| 4  | 1 BE | 2020-14 | 3 BE-Walloni | 1 | 4 | #####    | #####    |  |
| 5  | 1 BE | 2020-14 | 3 BE-Walloni | 1 | 5 | 0        | 0        |  |
| 6  | 1 BE | 2020-14 | 3 BE-Walloni | 2 | 1 | #####    | #####    |  |
| 7  | 1 BE | 2020-14 | 3 BE-Walloni | 2 | 2 | 0        | 0        |  |
| 8  | 1 BE | 2020-14 | 3 BE-Walloni | 2 | 3 | #####    | #####    |  |
| 9  | 1 BE | 2020-14 | 3 BE-Walloni | 2 | 4 | #####    | #####    |  |
| 10 | 1 BE | 2020-14 | 3 BE-Walloni | 2 | 5 | 0        | 0        |  |
| 11 | 1 BE | 2020-14 | 3 BE-Walloni | 3 | 1 | 0        | 0        |  |
| 12 | 1 BE | 2020-14 | 3 BE-Walloni | 3 | 2 | 0        | 0        |  |
| 13 | 1 BE | 2020-14 | 3 BE-Walloni | 3 | 3 | 0        | 0        |  |
| 14 | 1 BE | 2020-14 | 3 BE-Walloni | 3 | 4 | 0        | 0        |  |
| 15 | 1 BE | 2020-14 | 3 BE-Walloni | 3 | 5 | 0        | 0        |  |
| 16 | 1 BE | 2020-14 | 4 BE-Brussel | 1 | 1 | #####    | #####    |  |
| 17 | 1 BE | 2020-14 | 4 BE-Brussel | 1 | 2 | #####    | #####    |  |
| 18 | 1 BE | 2020-14 | 4 BE-Brussel | 1 | 3 | #####    | #####    |  |
| 19 | 1 BE | 2020-14 | 4 BE-Brussel | 1 | 4 | #####    | #####    |  |
| 20 | 1 BE | 2020-14 | 4 BE-Brussel | 1 | 5 | #####    | #####    |  |
| 21 | 1 BE | 2020-14 | 4 BE-Brussel | 2 | 1 | #####    | #####    |  |
| 22 | 1 BE | 2020-14 | 4 BE-Brussel | 2 | 2 | #####    | #####    |  |
| 23 | 1 BE | 2020-14 | 4 BE-Brussel | 2 | 3 | #####    | #####    |  |
| 24 | 1 BE | 2020-14 | 4 BE-Brussel | 2 | 4 | #####    | #####    |  |
| 25 | 1 BE | 2020-14 | 4 BE-Brussel | 2 | 5 | #####    | #####    |  |
| 26 | 1 BE | 2020-14 | 4 BE-Brussel | 2 | 5 | #####    | #####    |  |
| 27 | 1 BE | 2020-14 | 4 BE-Brussel | 3 | 1 | #####    | #####    |  |
| 28 | 1 BE | 2020-14 | 4 BE-Brussel | 3 | 2 | 0        | 0        |  |
| 29 | 1 BE | 2020-14 | 4 BE-Brussel | 3 | 3 | 1.272727 | #####    |  |
| 30 | 1 BE | 2020-14 | 4 BE-Brussel | 3 | 4 | 1.25     | 1.196943 |  |
| 31 | 1 BE | 2020-14 | 4 BE-Brussel | 3 | 5 | 0        | 0        |  |
| 32 | 1 BE | 2020-14 | 4 BE-Flander | 1 | 1 | 1.338299 | #####    |  |
| 33 | 1 BE | 2020-14 | 4 BE-Flander | 1 | 2 | 1.167609 | #####    |  |
| 34 | 1 BE | 2020-14 | 4 BE-Flander | 1 | 3 | 2.989354 | #####    |  |
| 35 | 1 BE | 2020-14 | 4 BE-Flander | 1 | 4 | #####    | #####    |  |
| 36 | 1 BE | 2020-14 | 4 BE-Flander | 1 | 5 | #####    | #####    |  |
| 37 | 1 BE | 2020-14 | 4 BE-Flander | 2 | 1 | 1.089373 | #####    |  |
| 38 | 1 BE | 2020-14 | 4 BE-Flander | 2 | 2 | 2.255814 | #####    |  |
| 39 | 1 BE | 2020-14 | 4 BE-Flander | 2 | 3 | 1.894737 | #####    |  |
| 40 | 1 BE | 2020-14 | 4 BE-Flander | 2 | 4 | 0.9375   | #####    |  |
| 41 | 1 BE | 2020-14 | 4 BE-Flander | 2 | 5 | #####    | #####    |  |
| 42 | 1 BE | 2020-14 | 4 BE-Flander | 3 | 1 | 1.61337  | #####    |  |
| 43 | 1 BE | 2020-14 | 4 BE-Flander | 3 | 2 | #####    | #####    |  |
| 44 | 1 BE | 2020-14 | 4 BE-Flander | 3 | 3 | 3.69697  | 1.094823 |  |
| 45 | 1 BE | 2020-14 | 4 BE-Flander | 3 | 4 | #####    | #####    |  |
| 46 | 1 BE | 2020-14 | 4 BE-Flander | 3 | 5 | #####    | #####    |  |
| 47 | 1 BE | 2020-14 | 4 BE-Overall | 1 | 1 | 1.106519 | #####    |  |
| 48 | 1 BE | 2020-14 | 4 BE-Overall | 1 | 2 | #####    | #####    |  |
| 49 | 1 BE | 2020-14 | 4 BE-Overall | 1 | 3 | 2.240598 | #####    |  |
| 50 | 1 BE | 2020-14 | 4 BE-Overall | 1 | 4 | #####    | #####    |  |
| 51 | 1 BE | 2020-14 | 4 BE-Overall | 1 | 5 | #####    | #####    |  |
| 52 | 1 BE | 2020-14 | 4 BE-Overall | 2 | 1 | #####    | #####    |  |
| 53 | 1 BE | 2020-14 | 4 BE-Overall | 2 | 2 | 1.237497 | #####    |  |
| 54 | 1 BE | 2020-14 | 4 BE-Overall | 2 | 3 | 1.555677 | #####    |  |
| 55 | 1 BE | 2020-14 | 4 BE-Overall | 2 | 4 | #####    | #####    |  |
| 56 | 1 BE | 2020-14 | 4 BE-Overall | 2 | 5 | #####    | #####    |  |
| 57 | 1 BE | 2020-14 | 4 BE-Overall | 3 | 1 | 1.341938 | #####    |  |
| 58 | 1 BE | 2020-14 | 4 BE-Overall | 3 | 2 | #####    | #####    |  |
| 59 | 1 BE | 2020-14 | 4 BE-Overall | 3 | 3 | 2.85188  | #####    |  |
| 60 | 1 BE | 2020-14 | 4 BE-Overall | 3 | 3 | 2.85188  | #####    |  |

|    |      |         |              |   |   |          |          |
|----|------|---------|--------------|---|---|----------|----------|
| 1  |      |         |              |   |   |          |          |
| 2  |      |         |              |   |   |          |          |
| 3  | 1 BE | 2020-14 | 4 BE-Overall | 3 | 4 | #####    | #####    |
| 4  | 1 BE | 2020-14 | 4 BE-Overall | 3 | 5 | #####    | #####    |
| 5  | 1 BE | 2020-14 | 4 BE-Walloni | 1 | 1 | #####    | #####    |
| 6  | 1 BE | 2020-14 | 4 BE-Walloni | 1 | 2 | #####    | #####    |
| 7  | 1 BE | 2020-14 | 4 BE-Walloni | 1 | 3 | 1.641623 | #####    |
| 8  | 1 BE | 2020-14 | 4 BE-Walloni | 1 | 4 | #####    | #####    |
| 9  | 1 BE | 2020-14 | 4 BE-Walloni | 1 | 5 | #####    | #####    |
| 10 | 1 BE | 2020-14 | 4 BE-Walloni | 2 | 1 | #####    | #####    |
| 11 | 1 BE | 2020-14 | 4 BE-Walloni | 2 | 2 | #####    | #####    |
| 12 | 1 BE | 2020-14 | 4 BE-Walloni | 2 | 3 | 1.619048 | #####    |
| 13 | 1 BE | 2020-14 | 4 BE-Walloni | 2 | 4 | #####    | #####    |
| 14 | 1 BE | 2020-14 | 4 BE-Walloni | 2 | 5 | 0        | 0        |
| 15 | 1 BE | 2020-14 | 4 BE-Walloni | 3 | 1 | #####    | #####    |
| 16 | 1 BE | 2020-14 | 4 BE-Walloni | 3 | 2 | #####    | #####    |
| 17 | 1 BE | 2020-14 | 4 BE-Walloni | 3 | 3 | 1.666667 | #####    |
| 18 | 1 BE | 2020-14 | 4 BE-Walloni | 3 | 4 | #####    | #####    |
| 19 | 1 BE | 2020-14 | 4 BE-Walloni | 3 | 5 | #####    | #####    |
| 20 | 1 BE | 2020-14 | 5 BE-Brussel | 1 | 1 | 1.531841 | #####    |
| 21 | 1 BE | 2020-14 | 5 BE-Brussel | 1 | 2 | #####    | #####    |
| 22 | 1 BE | 2020-14 | 5 BE-Brussel | 1 | 3 | 1.574605 | #####    |
| 23 | 1 BE | 2020-14 | 5 BE-Brussel | 1 | 4 | 2.829019 | #####    |
| 24 | 1 BE | 2020-14 | 5 BE-Brussel | 1 | 5 | #####    | #####    |
| 25 | 1 BE | 2020-14 | 5 BE-Brussel | 2 | 1 | 1.147894 | #####    |
| 26 | 1 BE | 2020-14 | 5 BE-Brussel | 2 | 2 | #####    | #####    |
| 27 | 1 BE | 2020-14 | 5 BE-Brussel | 2 | 3 | #####    | #####    |
| 28 | 1 BE | 2020-14 | 5 BE-Brussel | 2 | 4 | 2.675676 | #####    |
| 29 | 1 BE | 2020-14 | 5 BE-Brussel | 2 | 5 | #####    | #####    |
| 30 | 1 BE | 2020-14 | 5 BE-Brussel | 3 | 1 | 2.201416 | #####    |
| 31 | 1 BE | 2020-14 | 5 BE-Brussel | 3 | 2 | 0        | 0        |
| 32 | 1 BE | 2020-14 | 5 BE-Brussel | 3 | 3 | 3.181818 | 1.714621 |
| 33 | 1 BE | 2020-14 | 5 BE-Brussel | 3 | 4 | 3.076923 | 2.001632 |
| 34 | 1 BE | 2020-14 | 5 BE-Brussel | 3 | 5 | #####    | #####    |
| 35 | 1 BE | 2020-14 | 5 BE-Flander | 1 | 1 | 1.30048  | #####    |
| 36 | 1 BE | 2020-14 | 5 BE-Flander | 1 | 2 | 1.053653 | #####    |
| 37 | 1 BE | 2020-14 | 5 BE-Flander | 1 | 3 | 1.088662 | #####    |
| 38 | 1 BE | 2020-14 | 5 BE-Flander | 1 | 4 | 1.593679 | #####    |
| 39 | 1 BE | 2020-14 | 5 BE-Flander | 1 | 5 | 1.312213 | #####    |
| 40 | 1 BE | 2020-14 | 5 BE-Flander | 2 | 1 | 1.328343 | #####    |
| 41 | 1 BE | 2020-14 | 5 BE-Flander | 2 | 2 | #####    | #####    |
| 42 | 1 BE | 2020-14 | 5 BE-Flander | 2 | 3 | 1.428571 | #####    |
| 43 | 1 BE | 2020-14 | 5 BE-Flander | 2 | 4 | 1.639098 | #####    |
| 44 | 1 BE | 2020-14 | 5 BE-Flander | 2 | 5 | 1.238806 | #####    |
| 45 | 1 BE | 2020-14 | 5 BE-Flander | 3 | 1 | 1.26899  | #####    |
| 46 | 1 BE | 2020-14 | 5 BE-Flander | 3 | 2 | 1.533333 | #####    |
| 47 | 1 BE | 2020-14 | 5 BE-Flander | 3 | 3 | #####    | #####    |
| 48 | 1 BE | 2020-14 | 5 BE-Flander | 3 | 4 | 1.528302 | #####    |
| 49 | 1 BE | 2020-14 | 5 BE-Flander | 3 | 5 | 1.432432 | #####    |
| 50 | 1 BE | 2020-14 | 5 BE-Overall | 1 | 1 | 1.185867 | #####    |
| 51 | 1 BE | 2020-14 | 5 BE-Overall | 1 | 2 | #####    | #####    |
| 52 | 1 BE | 2020-14 | 5 BE-Overall | 1 | 3 | #####    | #####    |
| 53 | 1 BE | 2020-14 | 5 BE-Overall | 1 | 4 | 1.643041 | #####    |
| 54 | 1 BE | 2020-14 | 5 BE-Overall | 1 | 5 | 1.121644 | #####    |
| 55 | 1 BE | 2020-14 | 5 BE-Overall | 2 | 1 | 1.20051  | #####    |
| 56 | 1 BE | 2020-14 | 5 BE-Overall | 2 | 2 | #####    | #####    |
| 57 | 1 BE | 2020-14 | 5 BE-Overall | 2 | 3 | 1.09357  | #####    |
| 58 | 1 BE | 2020-14 | 5 BE-Overall | 2 | 4 | 1.729447 | #####    |
| 59 | 1 BE | 2020-14 | 5 BE-Overall | 2 |   |          |          |
| 60 | 1 BE | 2020-14 | 5 BE-Overall | 2 |   |          |          |

|    |      |         |              |   |   |          |          |  |
|----|------|---------|--------------|---|---|----------|----------|--|
| 1  |      |         |              |   |   |          |          |  |
| 2  |      |         |              |   |   |          |          |  |
| 3  | 1 BE | 2020-14 | 5 BE-Overall | 2 | 5 | 1.071574 | #####    |  |
| 4  | 1 BE | 2020-14 | 5 BE-Overall | 3 | 1 | 1.167444 | #####    |  |
| 5  | 1 BE | 2020-14 | 5 BE-Overall | 3 | 2 | 1.089131 | #####    |  |
| 6  | 1 BE | 2020-14 | 5 BE-Overall | 3 | 3 | #####    | #####    |  |
| 7  | 1 BE | 2020-14 | 5 BE-Overall | 3 | 4 | 1.521774 | #####    |  |
| 8  | 1 BE | 2020-14 | 5 BE-Overall | 3 | 5 | 1.210746 | #####    |  |
| 9  | 1 BE | 2020-14 | 5 BE-Walloni | 1 | 1 | #####    | #####    |  |
| 10 | 1 BE | 2020-14 | 5 BE-Walloni | 1 | 2 | #####    | #####    |  |
| 11 | 1 BE | 2020-14 | 5 BE-Walloni | 1 | 3 | #####    | #####    |  |
| 12 | 1 BE | 2020-14 | 5 BE-Walloni | 1 | 4 | 1.457263 | #####    |  |
| 13 | 1 BE | 2020-14 | 5 BE-Walloni | 1 | 5 | #####    | #####    |  |
| 14 | 1 BE | 2020-14 | 5 BE-Walloni | 2 | 1 | 1.01582  | #####    |  |
| 15 | 1 BE | 2020-14 | 5 BE-Walloni | 2 | 2 | #####    | #####    |  |
| 16 | 1 BE | 2020-14 | 5 BE-Walloni | 2 | 3 | #####    | #####    |  |
| 17 | 1 BE | 2020-14 | 5 BE-Walloni | 2 | 4 | 1.670732 | #####    |  |
| 18 | 1 BE | 2020-14 | 5 BE-Walloni | 2 | 5 | #####    | #####    |  |
| 19 | 1 BE | 2020-14 | 5 BE-Walloni | 3 | 1 | #####    | #####    |  |
| 20 | 1 BE | 2020-14 | 5 BE-Walloni | 3 | 2 | #####    | #####    |  |
| 21 | 1 BE | 2020-14 | 5 BE-Walloni | 3 | 3 | #####    | #####    |  |
| 22 | 1 BE | 2020-14 | 5 BE-Walloni | 3 | 3 | #####    | #####    |  |
| 23 | 1 BE | 2020-14 | 5 BE-Walloni | 3 | 4 | 1.181818 | #####    |  |
| 24 | 1 BE | 2020-14 | 5 BE-Walloni | 3 | 5 | #####    | #####    |  |
| 25 | 1 BE | 2020-15 | 1 BE-Brussel | 1 | 1 | 3.137088 | #####    |  |
| 26 | 1 BE | 2020-15 | 1 BE-Brussel | 1 | 2 | 3.101954 | #####    |  |
| 27 | 1 BE | 2020-15 | 1 BE-Brussel | 1 | 3 | 3.408816 | #####    |  |
| 28 | 1 BE | 2020-15 | 1 BE-Brussel | 1 | 4 | 3.146064 | #####    |  |
| 29 | 1 BE | 2020-15 | 1 BE-Brussel | 1 | 5 | 2.236054 | #####    |  |
| 30 | 1 BE | 2020-15 | 1 BE-Brussel | 2 | 1 | 3.400798 | #####    |  |
| 31 | 1 BE | 2020-15 | 1 BE-Brussel | 2 | 2 | 3.534247 | #####    |  |
| 32 | 1 BE | 2020-15 | 1 BE-Brussel | 2 | 3 | 3.581395 | #####    |  |
| 33 | 1 BE | 2020-15 | 1 BE-Brussel | 2 | 4 | 3.977528 | #####    |  |
| 34 | 1 BE | 2020-15 | 1 BE-Brussel | 2 | 5 | 1.846154 | #####    |  |
| 35 | 1 BE | 2020-15 | 1 BE-Brussel | 3 | 1 | 2.808198 | #####    |  |
| 36 | 1 BE | 2020-15 | 1 BE-Brussel | 3 | 2 | 2.571429 | #####    |  |
| 37 | 1 BE | 2020-15 | 1 BE-Brussel | 3 | 3 | 3.177778 | #####    |  |
| 38 | 1 BE | 2020-15 | 1 BE-Brussel | 3 | 4 | 2.381818 | #####    |  |
| 39 | 1 BE | 2020-15 | 1 BE-Brussel | 3 | 5 | 2.964286 | #####    |  |
| 40 | 1 BE | 2020-15 | 1 BE-Flander | 1 | 1 | 4.602171 | #####    |  |
| 41 | 1 BE | 2020-15 | 1 BE-Flander | 1 | 2 | 4.546703 | #####    |  |
| 42 | 1 BE | 2020-15 | 1 BE-Flander | 1 | 3 | 6.889647 | #####    |  |
| 43 | 1 BE | 2020-15 | 1 BE-Flander | 1 | 4 | 4.143107 | #####    |  |
| 44 | 1 BE | 2020-15 | 1 BE-Flander | 1 | 5 | 2.053122 | #####    |  |
| 45 | 1 BE | 2020-15 | 1 BE-Flander | 2 | 1 | 4.391206 | #####    |  |
| 46 | 1 BE | 2020-15 | 1 BE-Flander | 2 | 2 | 4.754237 | #####    |  |
| 47 | 1 BE | 2020-15 | 1 BE-Flander | 2 | 3 | 6.009524 | #####    |  |
| 48 | 1 BE | 2020-15 | 1 BE-Flander | 2 | 4 | 4.347656 | #####    |  |
| 49 | 1 BE | 2020-15 | 1 BE-Flander | 2 | 5 | 1.95935  | #####    |  |
| 50 | 1 BE | 2020-15 | 1 BE-Flander | 3 | 1 | 4.830959 | #####    |  |
| 51 | 1 BE | 2020-15 | 1 BE-Flander | 3 | 2 | 4.372093 | #####    |  |
| 52 | 1 BE | 2020-15 | 1 BE-Flander | 3 | 3 | 7.953846 | 1.020736 |  |
| 53 | 1 BE | 2020-15 | 1 BE-Flander | 3 | 4 | 3.938776 | #####    |  |
| 54 | 1 BE | 2020-15 | 1 BE-Flander | 3 | 5 | 2.174419 | #####    |  |
| 55 | 1 BE | 2020-15 | 1 BE-Overall | 1 | 1 | 4.123528 | #####    |  |
| 56 | 1 BE | 2020-15 | 1 BE-Overall | 1 | 2 | 4.1154   | #####    |  |
| 57 | 1 BE | 2020-15 | 1 BE-Overall | 1 | 3 | 5.640894 | #####    |  |
| 58 | 1 BE | 2020-15 | 1 BE-Overall | 1 | 4 | 3.844386 | #####    |  |
| 59 | 1 BE | 2020-15 | 1 BE-Overall | 1 | 5 | 2.026822 | #####    |  |
| 60 | 1 BE | 2020-15 | 1 BE-Overall | 1 |   |          |          |  |

|    |      |         |              |   |   |          |       |  |
|----|------|---------|--------------|---|---|----------|-------|--|
| 1  |      |         |              |   |   |          |       |  |
| 2  |      |         |              |   |   |          |       |  |
| 3  | 1 BE | 2020-15 | 1 BE-Overall | 2 | 1 | 3.939276 | ##### |  |
| 4  | 1 BE | 2020-15 | 1 BE-Overall | 2 | 2 | 4.119048 | ##### |  |
| 5  | 1 BE | 2020-15 | 1 BE-Overall | 2 | 3 | 5.186674 | ##### |  |
| 6  | 1 BE | 2020-15 | 1 BE-Overall | 2 | 4 | 3.934375 | ##### |  |
| 7  | 1 BE | 2020-15 | 1 BE-Overall | 2 | 5 | 1.80264  | ##### |  |
| 8  | 1 BE | 2020-15 | 1 BE-Overall | 3 | 1 | 4.327864 | ##### |  |
| 9  | 1 BE | 2020-15 | 1 BE-Overall | 3 | 2 | 4.112044 | ##### |  |
| 10 | 1 BE | 2020-15 | 1 BE-Overall | 3 | 3 | 6.163002 | ##### |  |
| 11 | 1 BE | 2020-15 | 1 BE-Overall | 3 | 4 | 3.745368 | ##### |  |
| 12 | 1 BE | 2020-15 | 1 BE-Overall | 3 | 5 | 2.31002  | ##### |  |
| 13 | 1 BE | 2020-15 | 1 BE-Walloni | 1 | 1 | 3.641167 | ##### |  |
| 14 | 1 BE | 2020-15 | 1 BE-Walloni | 1 | 2 | 3.80078  | ##### |  |
| 15 | 1 BE | 2020-15 | 1 BE-Walloni | 1 | 3 | 4.666017 | ##### |  |
| 16 | 1 BE | 2020-15 | 1 BE-Walloni | 1 | 4 | 3.503664 | ##### |  |
| 17 | 1 BE | 2020-15 | 1 BE-Walloni | 1 | 5 | 1.924963 | ##### |  |
| 18 | 1 BE | 2020-15 | 1 BE-Walloni | 2 | 1 | 3.363133 | ##### |  |
| 19 | 1 BE | 2020-15 | 1 BE-Walloni | 2 | 2 | 3.437908 | ##### |  |
| 20 | 1 BE | 2020-15 | 1 BE-Walloni | 2 | 3 | 4.587983 | ##### |  |
| 21 | 1 BE | 2020-15 | 1 BE-Walloni | 2 | 4 | 3.270142 | ##### |  |
| 22 | 1 BE | 2020-15 | 1 BE-Walloni | 2 | 5 | 1.457831 | ##### |  |
| 23 | 1 BE | 2020-15 | 1 BE-Walloni | 3 | 1 | 3.948742 | ##### |  |
| 24 | 1 BE | 2020-15 | 1 BE-Walloni | 3 | 2 | 4.148148 | ##### |  |
| 25 | 1 BE | 2020-15 | 1 BE-Walloni | 3 | 3 | 4.742857 | ##### |  |
| 26 | 1 BE | 2020-15 | 1 BE-Walloni | 3 | 4 | 3.828571 | ##### |  |
| 27 | 1 BE | 2020-15 | 1 BE-Walloni | 3 | 5 | 2.44     | ##### |  |
| 28 | 1 BE | 2020-15 | 2 BE-Brussel | 1 | 1 | 1.342639 | ##### |  |
| 29 | 1 BE | 2020-15 | 2 BE-Brussel | 1 | 2 | 2.055375 | ##### |  |
| 30 | 1 BE | 2020-15 | 2 BE-Brussel | 1 | 3 | 1.335383 | ##### |  |
| 31 | 1 BE | 2020-15 | 2 BE-Brussel | 1 | 4 | 1.093567 | ##### |  |
| 32 | 1 BE | 2020-15 | 2 BE-Brussel | 1 | 5 | #####    | ##### |  |
| 33 | 1 BE | 2020-15 | 2 BE-Brussel | 2 | 1 | 1.473615 | ##### |  |
| 34 | 1 BE | 2020-15 | 2 BE-Brussel | 2 | 2 | 2.210526 | ##### |  |
| 35 | 1 BE | 2020-15 | 2 BE-Brussel | 2 | 3 | 1.432836 | ##### |  |
| 36 | 1 BE | 2020-15 | 2 BE-Brussel | 2 | 4 | 1.431579 | ##### |  |
| 37 | 1 BE | 2020-15 | 2 BE-Brussel | 2 | 5 | #####    | ##### |  |
| 38 | 1 BE | 2020-15 | 2 BE-Brussel | 3 | 1 | 1.178267 | ##### |  |
| 39 | 1 BE | 2020-15 | 2 BE-Brussel | 3 | 2 | 1.857143 | ##### |  |
| 40 | 1 BE | 2020-15 | 2 BE-Brussel | 3 | 3 | 1.208333 | ##### |  |
| 41 | 1 BE | 2020-15 | 2 BE-Brussel | 3 | 4 | #####    | ##### |  |
| 42 | 1 BE | 2020-15 | 2 BE-Brussel | 3 | 5 | #####    | ##### |  |
| 43 | 1 BE | 2020-15 | 2 BE-Flander | 1 | 1 | 1.687079 | ##### |  |
| 44 | 1 BE | 2020-15 | 2 BE-Flander | 1 | 2 | 2.63343  | ##### |  |
| 45 | 1 BE | 2020-15 | 2 BE-Flander | 1 | 3 | 2.015272 | ##### |  |
| 46 | 1 BE | 2020-15 | 2 BE-Flander | 1 | 4 | 1.301899 | ##### |  |
| 47 | 1 BE | 2020-15 | 2 BE-Flander | 1 | 5 | #####    | ##### |  |
| 48 | 1 BE | 2020-15 | 2 BE-Flander | 2 | 1 | 1.719268 | ##### |  |
| 49 | 1 BE | 2020-15 | 2 BE-Flander | 2 | 2 | 2.611111 | ##### |  |
| 50 | 1 BE | 2020-15 | 2 BE-Flander | 2 | 3 | 2.03913  | ##### |  |
| 51 | 1 BE | 2020-15 | 2 BE-Flander | 2 | 4 | 1.425856 | ##### |  |
| 52 | 1 BE | 2020-15 | 2 BE-Flander | 2 | 5 | #####    | ##### |  |
| 53 | 1 BE | 2020-15 | 2 BE-Flander | 3 | 1 | 1.652396 | ##### |  |
| 54 | 1 BE | 2020-15 | 2 BE-Flander | 3 | 2 | 2.652174 | ##### |  |
| 55 | 1 BE | 2020-15 | 2 BE-Flander | 3 | 3 | 1.985507 | ##### |  |
| 56 | 1 BE | 2020-15 | 2 BE-Flander | 3 | 4 | 1.183544 | ##### |  |
| 57 | 1 BE | 2020-15 | 2 BE-Flander | 3 | 5 | #####    | ##### |  |
| 58 | 1 BE | 2020-15 | 2 BE-Flander | 3 | 5 | #####    | ##### |  |
| 59 | 1 BE | 2020-15 | 2 BE-Overall | 1 | 1 | 1.616838 | ##### |  |
| 60 | 1 BE | 2020-15 | 2 BE-Overall | 1 | 1 | 1.616838 | ##### |  |

|    |      |         |              |   |   |          |          |  |
|----|------|---------|--------------|---|---|----------|----------|--|
| 1  |      |         |              |   |   |          |          |  |
| 2  |      |         |              |   |   |          |          |  |
| 3  | 1 BE | 2020-15 | 2 BE-Overall | 1 | 2 | 2.48688  | #####    |  |
| 4  | 1 BE | 2020-15 | 2 BE-Overall | 1 | 3 | 1.854495 | #####    |  |
| 5  | 1 BE | 2020-15 | 2 BE-Overall | 1 | 4 | 1.289471 | #####    |  |
| 6  | 1 BE | 2020-15 | 2 BE-Overall | 1 | 5 | #####    | #####    |  |
| 7  | 1 BE | 2020-15 | 2 BE-Overall | 2 | 1 | 1.65215  | #####    |  |
| 8  | 1 BE | 2020-15 | 2 BE-Overall | 2 | 2 | 2.496185 | #####    |  |
| 9  | 1 BE | 2020-15 | 2 BE-Overall | 2 | 3 | 1.937579 | #####    |  |
| 10 | 1 BE | 2020-15 | 2 BE-Overall | 2 | 4 | 1.392914 | #####    |  |
| 11 | 1 BE | 2020-15 | 2 BE-Overall | 2 | 5 | #####    | #####    |  |
| 12 | 1 BE | 2020-15 | 2 BE-Overall | 3 | 1 | 1.577908 | #####    |  |
| 13 | 1 BE | 2020-15 | 2 BE-Overall | 3 | 2 | 2.4783   | #####    |  |
| 14 | 1 BE | 2020-15 | 2 BE-Overall | 3 | 3 | 1.758292 | #####    |  |
| 15 | 1 BE | 2020-15 | 2 BE-Overall | 3 | 4 | 1.178613 | #####    |  |
| 16 | 1 BE | 2020-15 | 2 BE-Overall | 3 | 5 | #####    | #####    |  |
| 17 | 1 BE | 2020-15 | 2 BE-Walloni | 1 | 1 | 1.590252 | #####    |  |
| 18 | 1 BE | 2020-15 | 2 BE-Walloni | 1 | 2 | 2.398998 | #####    |  |
| 19 | 1 BE | 2020-15 | 2 BE-Walloni | 1 | 3 | 1.833435 | #####    |  |
| 20 | 1 BE | 2020-15 | 2 BE-Walloni | 1 | 4 | 1.324862 | #####    |  |
| 21 | 1 BE | 2020-15 | 2 BE-Walloni | 1 | 5 | #####    | #####    |  |
| 22 | 1 BE | 2020-15 | 2 BE-Walloni | 2 | 1 | 1.602503 | #####    |  |
| 23 | 1 BE | 2020-15 | 2 BE-Walloni | 2 | 2 | 2.435897 | #####    |  |
| 24 | 1 BE | 2020-15 | 2 BE-Walloni | 2 | 3 | 2.019841 | #####    |  |
| 25 | 1 BE | 2020-15 | 2 BE-Walloni | 2 | 4 | 1.331818 | #####    |  |
| 26 | 1 BE | 2020-15 | 2 BE-Walloni | 2 | 5 | #####    | #####    |  |
| 27 | 1 BE | 2020-15 | 2 BE-Walloni | 3 | 1 | 1.576816 | #####    |  |
| 28 | 1 BE | 2020-15 | 2 BE-Walloni | 3 | 2 | 2.363636 | #####    |  |
| 29 | 1 BE | 2020-15 | 2 BE-Walloni | 3 | 3 | 1.652174 | #####    |  |
| 30 | 1 BE | 2020-15 | 2 BE-Walloni | 3 | 4 | 1.315315 | #####    |  |
| 31 | 1 BE | 2020-15 | 2 BE-Walloni | 3 | 5 | #####    | #####    |  |
| 32 | 1 BE | 2020-15 | 3 BE-Brussel | 1 | 1 | #####    | #####    |  |
| 33 | 1 BE | 2020-15 | 3 BE-Brussel | 1 | 2 | #####    | #####    |  |
| 34 | 1 BE | 2020-15 | 3 BE-Brussel | 1 | 3 | #####    | #####    |  |
| 35 | 1 BE | 2020-15 | 3 BE-Brussel | 1 | 4 | #####    | #####    |  |
| 36 | 1 BE | 2020-15 | 3 BE-Brussel | 1 | 5 | #####    | #####    |  |
| 37 | 1 BE | 2020-15 | 3 BE-Brussel | 2 | 1 | #####    | #####    |  |
| 38 | 1 BE | 2020-15 | 3 BE-Brussel | 2 | 2 | #####    | #####    |  |
| 39 | 1 BE | 2020-15 | 3 BE-Brussel | 2 | 3 | #####    | #####    |  |
| 40 | 1 BE | 2020-15 | 3 BE-Brussel | 2 | 4 | #####    | #####    |  |
| 41 | 1 BE | 2020-15 | 3 BE-Brussel | 2 | 5 | 0        | 0        |  |
| 42 | 1 BE | 2020-15 | 3 BE-Brussel | 3 | 1 | #####    | #####    |  |
| 43 | 1 BE | 2020-15 | 3 BE-Brussel | 3 | 2 | 0        | 0        |  |
| 44 | 1 BE | 2020-15 | 3 BE-Brussel | 3 | 3 | 0        | 0        |  |
| 45 | 1 BE | 2020-15 | 3 BE-Brussel | 3 | 4 | 0        | 0        |  |
| 46 | 1 BE | 2020-15 | 3 BE-Brussel | 3 | 5 | #####    | #####    |  |
| 47 | 1 BE | 2020-15 | 3 BE-Flander | 1 | 1 | #####    | #####    |  |
| 48 | 1 BE | 2020-15 | 3 BE-Flander | 1 | 2 | #####    | #####    |  |
| 49 | 1 BE | 2020-15 | 3 BE-Flander | 1 | 3 | #####    | #####    |  |
| 50 | 1 BE | 2020-15 | 3 BE-Flander | 1 | 4 | #####    | #####    |  |
| 51 | 1 BE | 2020-15 | 3 BE-Flander | 1 | 5 | #####    | #####    |  |
| 52 | 1 BE | 2020-15 | 3 BE-Flander | 2 | 1 | #####    | #####    |  |
| 53 | 1 BE | 2020-15 | 3 BE-Flander | 2 | 2 | 0        | 0        |  |
| 54 | 1 BE | 2020-15 | 3 BE-Flander | 2 | 3 | #####    | #####    |  |
| 55 | 1 BE | 2020-15 | 3 BE-Flander | 2 | 4 | #####    | #####    |  |
| 56 | 1 BE | 2020-15 | 3 BE-Flander | 2 | 5 | #####    | #####    |  |
| 57 | 1 BE | 2020-15 | 3 BE-Flander | 3 | 1 | #####    | #####    |  |
| 58 | 1 BE | 2020-15 | 3 BE-Flander | 3 | 2 | #####    | 0.107522 |  |
| 59 | 1 BE | 2020-15 | 3 BE-Flander | 3 | 3 | #####    |          |  |
| 60 | 1 BE | 2020-15 | 3 BE-Flander | 3 | 4 | #####    |          |  |

|    |      |         |              |   |   |          |       |  |
|----|------|---------|--------------|---|---|----------|-------|--|
| 1  |      |         |              |   |   |          |       |  |
| 2  |      |         |              |   |   |          |       |  |
| 3  | 1 BE | 2020-15 | 3 BE-Flander | 3 | 3 | 0        | 0     |  |
| 4  | 1 BE | 2020-15 | 3 BE-Flander | 3 | 4 | 0        | 0     |  |
| 5  | 1 BE | 2020-15 | 3 BE-Flander | 3 | 5 | #####    | ##### |  |
| 6  | 1 BE | 2020-15 | 3 BE-Overall | 1 | 1 | #####    | ##### |  |
| 7  | 1 BE | 2020-15 | 3 BE-Overall | 1 | 2 | #####    | ##### |  |
| 8  | 1 BE | 2020-15 | 3 BE-Overall | 1 | 3 | #####    | ##### |  |
| 9  | 1 BE | 2020-15 | 3 BE-Overall | 1 | 4 | #####    | ##### |  |
| 10 | 1 BE | 2020-15 | 3 BE-Overall | 1 | 5 | #####    | ##### |  |
| 11 | 1 BE | 2020-15 | 3 BE-Overall | 2 | 1 | #####    | ##### |  |
| 12 | 1 BE | 2020-15 | 3 BE-Overall | 2 | 2 | #####    | ##### |  |
| 13 | 1 BE | 2020-15 | 3 BE-Overall | 2 | 3 | #####    | ##### |  |
| 14 | 1 BE | 2020-15 | 3 BE-Overall | 2 | 4 | #####    | ##### |  |
| 15 | 1 BE | 2020-15 | 3 BE-Overall | 2 | 5 | #####    | ##### |  |
| 16 | 1 BE | 2020-15 | 3 BE-Overall | 3 | 1 | #####    | ##### |  |
| 17 | 1 BE | 2020-15 | 3 BE-Overall | 3 | 2 | #####    | ##### |  |
| 18 | 1 BE | 2020-15 | 3 BE-Overall | 3 | 3 | #####    | ##### |  |
| 19 | 1 BE | 2020-15 | 3 BE-Overall | 3 | 4 | #####    | ##### |  |
| 20 | 1 BE | 2020-15 | 3 BE-Overall | 3 | 5 | #####    | ##### |  |
| 21 | 1 BE | 2020-15 | 3 BE-Overall | 3 | 5 | #####    | ##### |  |
| 22 | 1 BE | 2020-15 | 3 BE-Walloni | 1 | 1 | #####    | ##### |  |
| 23 | 1 BE | 2020-15 | 3 BE-Walloni | 1 | 2 | #####    | ##### |  |
| 24 | 1 BE | 2020-15 | 3 BE-Walloni | 1 | 3 | #####    | ##### |  |
| 25 | 1 BE | 2020-15 | 3 BE-Walloni | 1 | 4 | #####    | ##### |  |
| 26 | 1 BE | 2020-15 | 3 BE-Walloni | 1 | 5 | 0        | 0     |  |
| 27 | 1 BE | 2020-15 | 3 BE-Walloni | 2 | 1 | #####    | ##### |  |
| 28 | 1 BE | 2020-15 | 3 BE-Walloni | 2 | 2 | #####    | ##### |  |
| 29 | 1 BE | 2020-15 | 3 BE-Walloni | 2 | 3 | #####    | ##### |  |
| 30 | 1 BE | 2020-15 | 3 BE-Walloni | 2 | 4 | #####    | ##### |  |
| 31 | 1 BE | 2020-15 | 3 BE-Walloni | 2 | 5 | 0        | 0     |  |
| 32 | 1 BE | 2020-15 | 3 BE-Walloni | 3 | 1 | #####    | ##### |  |
| 33 | 1 BE | 2020-15 | 3 BE-Walloni | 3 | 2 | #####    | ##### |  |
| 34 | 1 BE | 2020-15 | 3 BE-Walloni | 3 | 3 | #####    | ##### |  |
| 35 | 1 BE | 2020-15 | 3 BE-Walloni | 3 | 4 | #####    | ##### |  |
| 36 | 1 BE | 2020-15 | 3 BE-Walloni | 3 | 5 | 0        | 0     |  |
| 37 | 1 BE | 2020-15 | 4 BE-Brussel | 1 | 1 | #####    | ##### |  |
| 38 | 1 BE | 2020-15 | 4 BE-Brussel | 1 | 2 | #####    | ##### |  |
| 39 | 1 BE | 2020-15 | 4 BE-Brussel | 1 | 3 | 1.250012 | ##### |  |
| 40 | 1 BE | 2020-15 | 4 BE-Brussel | 1 | 4 | #####    | ##### |  |
| 41 | 1 BE | 2020-15 | 4 BE-Brussel | 1 | 5 | #####    | ##### |  |
| 42 | 1 BE | 2020-15 | 4 BE-Brussel | 2 | 1 | #####    | ##### |  |
| 43 | 1 BE | 2020-15 | 4 BE-Brussel | 2 | 2 | #####    | ##### |  |
| 44 | 1 BE | 2020-15 | 4 BE-Brussel | 2 | 3 | 1.27907  | ##### |  |
| 45 | 1 BE | 2020-15 | 4 BE-Brussel | 2 | 4 | #####    | ##### |  |
| 46 | 1 BE | 2020-15 | 4 BE-Brussel | 2 | 5 | #####    | ##### |  |
| 47 | 1 BE | 2020-15 | 4 BE-Brussel | 3 | 1 | #####    | ##### |  |
| 48 | 1 BE | 2020-15 | 4 BE-Brussel | 3 | 2 | 0        | 0     |  |
| 49 | 1 BE | 2020-15 | 4 BE-Brussel | 3 | 3 | 1.212766 | ##### |  |
| 50 | 1 BE | 2020-15 | 4 BE-Brussel | 3 | 4 | #####    | ##### |  |
| 51 | 1 BE | 2020-15 | 4 BE-Brussel | 3 | 5 | 0        | 0     |  |
| 52 | 1 BE | 2020-15 | 4 BE-Flander | 1 | 1 | 1.722929 | ##### |  |
| 53 | 1 BE | 2020-15 | 4 BE-Flander | 1 | 2 | 1.166785 | ##### |  |
| 54 | 1 BE | 2020-15 | 4 BE-Flander | 1 | 3 | 3.369425 | ##### |  |
| 55 | 1 BE | 2020-15 | 4 BE-Flander | 1 | 4 | 1.4997   | ##### |  |
| 56 | 1 BE | 2020-15 | 4 BE-Flander | 1 | 5 | #####    | ##### |  |
| 57 | 1 BE | 2020-15 | 4 BE-Flander | 1 | 5 | #####    | ##### |  |
| 58 | 1 BE | 2020-15 | 4 BE-Flander | 2 | 1 | 1.492507 | ##### |  |
| 59 | 1 BE | 2020-15 | 4 BE-Flander | 2 | 2 | 1.09322  | ##### |  |
| 60 | 1 BE | 2020-15 | 4 BE-Flander | 2 | 3 | 2.682464 | ##### |  |

|    |      |         |              |   |   |          |       |  |
|----|------|---------|--------------|---|---|----------|-------|--|
| 1  |      |         |              |   |   |          |       |  |
| 2  |      |         |              |   |   |          |       |  |
| 3  | 1 BE | 2020-15 | 4 BE-Flander | 2 | 4 | 1.46875  | ##### |  |
| 4  | 1 BE | 2020-15 | 4 BE-Flander | 2 | 5 | #####    | ##### |  |
| 5  | 1 BE | 2020-15 | 4 BE-Flander | 3 | 1 | 1.968822 | ##### |  |
| 6  | 1 BE | 2020-15 | 4 BE-Flander | 3 | 2 | 1.227273 | ##### |  |
| 7  | 1 BE | 2020-15 | 4 BE-Flander | 3 | 3 | 4.179104 | ##### |  |
| 8  | 1 BE | 2020-15 | 4 BE-Flander | 3 | 4 | 1.530201 | ##### |  |
| 9  | 1 BE | 2020-15 | 4 BE-Flander | 3 | 5 | #####    | ##### |  |
| 10 | 1 BE | 2020-15 | 4 BE-Overall | 1 | 1 | 1.314109 | ##### |  |
| 11 | 1 BE | 2020-15 | 4 BE-Overall | 1 | 2 | #####    | ##### |  |
| 12 | 1 BE | 2020-15 | 4 BE-Overall | 1 | 3 | 2.452037 | ##### |  |
| 13 | 1 BE | 2020-15 | 4 BE-Overall | 1 | 4 | 1.202864 | ##### |  |
| 14 | 1 BE | 2020-15 | 4 BE-Overall | 1 | 5 | #####    | ##### |  |
| 15 | 1 BE | 2020-15 | 4 BE-Overall | 2 | 1 | 1.163649 | ##### |  |
| 16 | 1 BE | 2020-15 | 4 BE-Overall | 2 | 2 | #####    | ##### |  |
| 17 | 1 BE | 2020-15 | 4 BE-Overall | 2 | 3 | 2.045437 | ##### |  |
| 18 | 1 BE | 2020-15 | 4 BE-Overall | 2 | 4 | 1.152394 | ##### |  |
| 19 | 1 BE | 2020-15 | 4 BE-Overall | 2 | 5 | #####    | ##### |  |
| 20 | 1 BE | 2020-15 | 4 BE-Overall | 3 | 1 | 1.478956 | ##### |  |
| 21 | 1 BE | 2020-15 | 4 BE-Overall | 3 | 2 | #####    | ##### |  |
| 22 | 1 BE | 2020-15 | 4 BE-Overall | 3 | 3 | 2.909616 | ##### |  |
| 23 | 1 BE | 2020-15 | 4 BE-Overall | 3 | 4 | 1.25811  | ##### |  |
| 24 | 1 BE | 2020-15 | 4 BE-Overall | 3 | 5 | #####    | ##### |  |
| 25 | 1 BE | 2020-15 | 4 BE-Walloni | 1 | 1 | #####    | ##### |  |
| 26 | 1 BE | 2020-15 | 4 BE-Walloni | 1 | 2 | #####    | ##### |  |
| 27 | 1 BE | 2020-15 | 4 BE-Walloni | 1 | 3 | 1.518675 | ##### |  |
| 28 | 1 BE | 2020-15 | 4 BE-Walloni | 1 | 4 | #####    | ##### |  |
| 29 | 1 BE | 2020-15 | 4 BE-Walloni | 1 | 5 | #####    | ##### |  |
| 30 | 1 BE | 2020-15 | 4 BE-Walloni | 2 | 1 | #####    | ##### |  |
| 31 | 1 BE | 2020-15 | 4 BE-Walloni | 2 | 2 | #####    | ##### |  |
| 32 | 1 BE | 2020-15 | 4 BE-Walloni | 2 | 3 | 1.316239 | ##### |  |
| 33 | 1 BE | 2020-15 | 4 BE-Walloni | 2 | 4 | #####    | ##### |  |
| 34 | 1 BE | 2020-15 | 4 BE-Walloni | 2 | 5 | 0        | 0     |  |
| 35 | 1 BE | 2020-15 | 4 BE-Walloni | 2 | 1 | #####    | ##### |  |
| 36 | 1 BE | 2020-15 | 4 BE-Walloni | 3 | 2 | #####    | ##### |  |
| 37 | 1 BE | 2020-15 | 4 BE-Walloni | 3 | 3 | 1.716981 | ##### |  |
| 38 | 1 BE | 2020-15 | 4 BE-Walloni | 3 | 4 | 1        | ##### |  |
| 39 | 1 BE | 2020-15 | 4 BE-Walloni | 3 | 5 | #####    | ##### |  |
| 40 | 1 BE | 2020-15 | 4 BE-Walloni | 3 | 1 | 1.057497 | ##### |  |
| 41 | 1 BE | 2020-15 | 5 BE-Brussel | 1 | 2 | #####    | ##### |  |
| 42 | 1 BE | 2020-15 | 5 BE-Brussel | 1 | 3 | #####    | ##### |  |
| 43 | 1 BE | 2020-15 | 5 BE-Brussel | 1 | 4 | 1.618727 | ##### |  |
| 44 | 1 BE | 2020-15 | 5 BE-Brussel | 1 | 5 | 1.373827 | ##### |  |
| 45 | 1 BE | 2020-15 | 5 BE-Brussel | 2 | 1 | 1.054391 | ##### |  |
| 46 | 1 BE | 2020-15 | 5 BE-Brussel | 2 | 2 | #####    | ##### |  |
| 47 | 1 BE | 2020-15 | 5 BE-Brussel | 2 | 3 | #####    | ##### |  |
| 48 | 1 BE | 2020-15 | 5 BE-Brussel | 2 | 4 | 1.915789 | ##### |  |
| 49 | 1 BE | 2020-15 | 5 BE-Brussel | 2 | 5 | 1.057692 | ##### |  |
| 50 | 1 BE | 2020-15 | 5 BE-Brussel | 3 | 1 | 1.061488 | ##### |  |
| 51 | 1 BE | 2020-15 | 5 BE-Brussel | 3 | 2 | #####    | ##### |  |
| 52 | 1 BE | 2020-15 | 5 BE-Brussel | 3 | 3 | #####    | ##### |  |
| 53 | 1 BE | 2020-15 | 5 BE-Brussel | 3 | 4 | 1.327273 | ##### |  |
| 54 | 1 BE | 2020-15 | 5 BE-Brussel | 3 | 5 | 1.964286 | ##### |  |
| 55 | 1 BE | 2020-15 | 5 BE-Flander | 1 | 1 | 1.280866 | ##### |  |
| 56 | 1 BE | 2020-15 | 5 BE-Flander | 1 | 2 | 1.043822 | ##### |  |
| 57 | 1 BE | 2020-15 | 5 BE-Flander | 1 | 3 | 1.566456 | ##### |  |
| 58 | 1 BE | 2020-15 | 5 BE-Flander | 1 | 4 | 1.34001  | ##### |  |
| 59 | 1 BE | 2020-15 | 5 BE-Flander | 1 |   |          |       |  |
| 60 | 1 BE | 2020-15 | 5 BE-Flander | 1 |   |          |       |  |



|    |      |         |              |   |   |          |          |  |
|----|------|---------|--------------|---|---|----------|----------|--|
| 1  |      |         |              |   |   |          |          |  |
| 2  |      |         |              |   |   |          |          |  |
| 3  | 1 BE | 2020-15 | 5 BE-Flander | 1 | 5 | #####    | #####    |  |
| 4  | 1 BE | 2020-15 | 5 BE-Flander | 2 | 1 | 1.176564 | #####    |  |
| 5  | 1 BE | 2020-15 | 5 BE-Flander | 2 | 2 | 1.198413 | #####    |  |
| 6  | 1 BE | 2020-15 | 5 BE-Flander | 2 | 3 | 1.217391 | #####    |  |
| 7  | 1 BE | 2020-15 | 5 BE-Flander | 2 | 4 | 1.395437 | #####    |  |
| 8  | 1 BE | 2020-15 | 5 BE-Flander | 2 | 5 | #####    | #####    |  |
| 9  | 1 BE | 2020-15 | 5 BE-Flander | 3 | 1 | 1.395667 | #####    |  |
| 10 | 1 BE | 2020-15 | 5 BE-Flander | 3 | 2 | #####    | #####    |  |
| 11 | 1 BE | 2020-15 | 5 BE-Flander | 3 | 3 | 2.014925 | #####    |  |
| 12 | 1 BE | 2020-15 | 5 BE-Flander | 3 | 4 | 1.285714 | #####    |  |
| 13 | 1 BE | 2020-15 | 5 BE-Flander | 3 | 5 | 1.162791 | #####    |  |
| 14 | 1 BE | 2020-15 | 5 BE-Overall | 1 | 1 | 1.225059 | #####    |  |
| 15 | 1 BE | 2020-15 | 5 BE-Overall | 1 | 2 | #####    | #####    |  |
| 16 | 1 BE | 2020-15 | 5 BE-Overall | 1 | 3 | 1.371905 | #####    |  |
| 17 | 1 BE | 2020-15 | 5 BE-Overall | 1 | 4 | 1.353016 | #####    |  |
| 18 | 1 BE | 2020-15 | 5 BE-Overall | 1 | 5 | 1.047427 | #####    |  |
| 19 | 1 BE | 2020-15 | 5 BE-Overall | 2 | 1 | 1.101942 | #####    |  |
| 20 | 1 BE | 2020-15 | 5 BE-Overall | 2 | 2 | #####    | #####    |  |
| 21 | 1 BE | 2020-15 | 5 BE-Overall | 2 | 3 | 1.142503 | #####    |  |
| 22 | 1 BE | 2020-15 | 5 BE-Overall | 2 | 4 | 1.321436 | #####    |  |
| 23 | 1 BE | 2020-15 | 5 BE-Overall | 2 | 5 | #####    | #####    |  |
| 24 | 1 BE | 2020-15 | 5 BE-Overall | 3 | 1 | 1.363141 | #####    |  |
| 25 | 1 BE | 2020-15 | 5 BE-Overall | 3 | 2 | #####    | #####    |  |
| 26 | 1 BE | 2020-15 | 5 BE-Overall | 3 | 3 | 1.644704 | #####    |  |
| 27 | 1 BE | 2020-15 | 5 BE-Overall | 3 | 4 | 1.387407 | #####    |  |
| 28 | 1 BE | 2020-15 | 5 BE-Overall | 3 | 5 | 1.276138 | #####    |  |
| 29 | 1 BE | 2020-15 | 5 BE-Walloni | 1 | 1 | 1.186361 | #####    |  |
| 30 | 1 BE | 2020-15 | 5 BE-Walloni | 1 | 2 | #####    | #####    |  |
| 31 | 1 BE | 2020-15 | 5 BE-Walloni | 1 | 3 | 1.305991 | #####    |  |
| 32 | 1 BE | 2020-15 | 5 BE-Walloni | 1 | 4 | 1.298171 | #####    |  |
| 33 | 1 BE | 2020-15 | 5 BE-Walloni | 1 | 5 | 1.139631 | #####    |  |
| 34 | 1 BE | 2020-15 | 5 BE-Walloni | 1 | 1 | #####    | #####    |  |
| 35 | 1 BE | 2020-15 | 5 BE-Walloni | 2 | 2 | #####    | #####    |  |
| 36 | 1 BE | 2020-15 | 5 BE-Walloni | 2 | 2 | #####    | #####    |  |
| 37 | 1 BE | 2020-15 | 5 BE-Walloni | 2 | 3 | 1.172691 | #####    |  |
| 38 | 1 BE | 2020-15 | 5 BE-Walloni | 2 | 4 | 1.054795 | #####    |  |
| 39 | 1 BE | 2020-15 | 5 BE-Walloni | 2 | 5 | #####    | #####    |  |
| 40 | 1 BE | 2020-15 | 5 BE-Walloni | 3 | 1 | 1.403531 | #####    |  |
| 41 | 1 BE | 2020-15 | 5 BE-Walloni | 3 | 2 | 1.092593 | #####    |  |
| 42 | 1 BE | 2020-15 | 5 BE-Walloni | 3 | 3 | 1.4375   | #####    |  |
| 43 | 1 BE | 2020-15 | 5 BE-Walloni | 3 | 4 | 1.630631 | #####    |  |
| 44 | 1 BE | 2020-15 | 5 BE-Walloni | 3 | 5 | 1.36     | #####    |  |
| 45 | 1 DE | 2020-12 | 1 DE-East    | 1 | 1 | 7.413024 | #####    |  |
| 46 | 1 DE | 2020-12 | 1 DE-East    | 1 | 2 | 7.53972  | 1.076009 |  |
| 47 | 1 DE | 2020-12 | 1 DE-East    | 1 | 3 | 8.882592 | #####    |  |
| 48 | 1 DE | 2020-12 | 1 DE-East    | 1 | 4 | 7.766412 | #####    |  |
| 49 | 1 DE | 2020-12 | 1 DE-East    | 1 | 5 | 5.169703 | 1.309735 |  |
| 50 | 1 DE | 2020-12 | 1 DE-East    | 2 | 1 | 7.00684  | #####    |  |
| 51 | 1 DE | 2020-12 | 1 DE-East    | 2 | 2 | 7.133333 | 1.032569 |  |
| 52 | 1 DE | 2020-12 | 1 DE-East    | 2 | 3 | 8.673913 | #####    |  |
| 53 | 1 DE | 2020-12 | 1 DE-East    | 2 | 4 | 8.405405 | 1.176573 |  |
| 54 | 1 DE | 2020-12 | 1 DE-East    | 2 | 5 | 2.916667 | #####    |  |
| 55 | 1 DE | 2020-12 | 1 DE-East    | 3 | 1 | 7.947027 | #####    |  |
| 56 | 1 DE | 2020-12 | 1 DE-East    | 3 | 2 | 7.916667 | 1.835176 |  |
| 57 | 1 DE | 2020-12 | 1 DE-East    | 3 | 3 | 9.12     | 1.256506 |  |
| 58 | 1 DE | 2020-12 | 1 DE-East    | 3 | 4 | 6.357143 | 1.592829 |  |
| 59 | 1 DE | 2020-12 | 1 DE-East    | 3 | 5 | 7.714286 | 2.410637 |  |
| 60 | 1 DE | 2020-12 | 1 DE-East    | 3 |   |          |          |  |

|    |      |         |              |   |   |          |          |  |
|----|------|---------|--------------|---|---|----------|----------|--|
| 1  |      |         |              |   |   |          |          |  |
| 2  |      |         |              |   |   |          |          |  |
| 3  | 1 DE | 2020-12 | 1 DE-North   | 1 | 1 | 6.636862 | #####    |  |
| 4  | 1 DE | 2020-12 | 1 DE-North   | 1 | 2 | 8.207047 | 1.136363 |  |
| 5  | 1 DE | 2020-12 | 1 DE-North   | 1 | 3 | 8.198439 | 1.154777 |  |
| 6  | 1 DE | 2020-12 | 1 DE-North   | 1 | 4 | 7.750078 | 1.244348 |  |
| 7  | 1 DE | 2020-12 | 1 DE-North   | 1 | 5 | 3.541758 | #####    |  |
| 8  | 1 DE | 2020-12 | 1 DE-North   | 2 | 1 | 5.995591 | #####    |  |
| 9  | 1 DE | 2020-12 | 1 DE-North   | 2 | 2 | 6.809524 | 1.802873 |  |
| 10 | 1 DE | 2020-12 | 1 DE-North   | 2 | 3 | 7.74359  | 1.220497 |  |
| 11 | 1 DE | 2020-12 | 1 DE-North   | 2 | 4 | 7.789474 | 1.709741 |  |
| 12 | 1 DE | 2020-12 | 1 DE-North   | 2 | 5 | 3.333333 | #####    |  |
| 13 | 1 DE | 2020-12 | 1 DE-North   | 3 | 1 | 7.625109 | #####    |  |
| 14 | 1 DE | 2020-12 | 1 DE-North   | 3 | 2 | 9.222222 | 1.403585 |  |
| 15 | 1 DE | 2020-12 | 1 DE-North   | 3 | 3 | 8.764706 | 2.093991 |  |
| 16 | 1 DE | 2020-12 | 1 DE-North   | 3 | 4 | 7.6875   | 1.731517 |  |
| 17 | 1 DE | 2020-12 | 1 DE-North   | 3 | 5 | 4.125    | 1.29233  |  |
| 18 | 1 DE | 2020-12 | 1 DE-Overall | 1 | 1 | 6.84881  | #####    |  |
| 19 | 1 DE | 2020-12 | 1 DE-Overall | 1 | 2 | 7.74718  | #####    |  |
| 20 | 1 DE | 2020-12 | 1 DE-Overall | 1 | 3 | 8.19306  | #####    |  |
| 21 | 1 DE | 2020-12 | 1 DE-Overall | 1 | 4 | 7.680438 | #####    |  |
| 22 | 1 DE | 2020-12 | 1 DE-Overall | 1 | 5 | 3.553265 | #####    |  |
| 23 | 1 DE | 2020-12 | 1 DE-Overall | 2 | 1 | 6.647777 | #####    |  |
| 24 | 1 DE | 2020-12 | 1 DE-Overall | 2 | 2 | 8.583557 | #####    |  |
| 25 | 1 DE | 2020-12 | 1 DE-Overall | 2 | 3 | 7.997897 | #####    |  |
| 26 | 1 DE | 2020-12 | 1 DE-Overall | 2 | 4 | 8.098143 | #####    |  |
| 27 | 1 DE | 2020-12 | 1 DE-Overall | 2 | 5 | 2.635293 | #####    |  |
| 28 | 1 DE | 2020-12 | 1 DE-Overall | 3 | 1 | 7.091013 | #####    |  |
| 29 | 1 DE | 2020-12 | 1 DE-Overall | 3 | 2 | 7.105047 | #####    |  |
| 30 | 1 DE | 2020-12 | 1 DE-Overall | 3 | 3 | 8.428171 | #####    |  |
| 31 | 1 DE | 2020-12 | 1 DE-Overall | 3 | 4 | 7.16433  | #####    |  |
| 32 | 1 DE | 2020-12 | 1 DE-Overall | 3 | 5 | 5.164958 | #####    |  |
| 33 | 1 DE | 2020-12 | 1 DE-South   | 1 | 1 | 7.494619 | #####    |  |
| 34 | 1 DE | 2020-12 | 1 DE-South   | 1 | 2 | 8.60936  | 1.229866 |  |
| 35 | 1 DE | 2020-12 | 1 DE-South   | 1 | 3 | 8.999549 | 1.147219 |  |
| 36 | 1 DE | 2020-12 | 1 DE-South   | 1 | 4 | 8.934659 | 1.09898  |  |
| 37 | 1 DE | 2020-12 | 1 DE-South   | 1 | 5 | 2.565209 | #####    |  |
| 38 | 1 DE | 2020-12 | 1 DE-South   | 2 | 1 | 6.98755  | #####    |  |
| 39 | 1 DE | 2020-12 | 1 DE-South   | 2 | 2 | 8.658537 | 1.163464 |  |
| 40 | 1 DE | 2020-12 | 1 DE-South   | 2 | 3 | 8.255319 | 1.352932 |  |
| 41 | 1 DE | 2020-12 | 1 DE-South   | 2 | 4 | 8.942857 | 1.750644 |  |
| 42 | 1 DE | 2020-12 | 1 DE-South   | 2 | 5 | 1.923077 | #####    |  |
| 43 | 1 DE | 2020-12 | 1 DE-South   | 3 | 1 | 8.088953 | #####    |  |
| 44 | 1 DE | 2020-12 | 1 DE-South   | 3 | 2 | 8.5625   | 2.130574 |  |
| 45 | 1 DE | 2020-12 | 1 DE-South   | 3 | 3 | 9.916667 | 1.930243 |  |
| 46 | 1 DE | 2020-12 | 1 DE-South   | 3 | 4 | 8.925926 | 1.293645 |  |
| 47 | 1 DE | 2020-12 | 1 DE-South   | 3 | 5 | 3.545455 | 1.070813 |  |
| 48 | 1 DE | 2020-12 | 1 DE-West    | 1 | 1 | 6.183284 | #####    |  |
| 49 | 1 DE | 2020-12 | 1 DE-West    | 1 | 2 | 7.269612 | #####    |  |
| 50 | 1 DE | 2020-12 | 1 DE-West    | 1 | 3 | 6.977344 | #####    |  |
| 51 | 1 DE | 2020-12 | 1 DE-West    | 1 | 4 | 6.541975 | #####    |  |
| 52 | 1 DE | 2020-12 | 1 DE-West    | 1 | 5 | 3.45174  | #####    |  |
| 53 | 1 DE | 2020-12 | 1 DE-West    | 2 | 1 | 6.498449 | #####    |  |
| 54 | 1 DE | 2020-12 | 1 DE-West    | 2 | 2 | 9.372549 | 1.433459 |  |
| 55 | 1 DE | 2020-12 | 1 DE-West    | 2 | 3 | 7.44898  | 1.107783 |  |
| 56 | 1 DE | 2020-12 | 1 DE-West    | 2 | 4 | 7.307692 | 1.116056 |  |
| 57 | 1 DE | 2020-12 | 1 DE-West    | 2 | 5 | 2.578947 | #####    |  |
| 58 | 1 DE | 2020-12 | 1 DE-West    | 3 | 1 | 5.844108 | #####    |  |
| 59 | 1 DE | 2020-12 | 1 DE-West    | 3 |   |          |          |  |
| 60 | 1 DE | 2020-12 | 1 DE-West    | 3 |   |          |          |  |

|    |      |         |              |   |   |          |          |
|----|------|---------|--------------|---|---|----------|----------|
| 1  |      |         |              |   |   |          |          |
| 2  |      |         |              |   |   |          |          |
| 3  | 1 DE | 2020-12 | 1 DE-West    | 3 | 2 | 5.875    | 1.240749 |
| 4  | 1 DE | 2020-12 | 1 DE-West    | 3 | 3 | 6.409091 | 1.578169 |
| 5  | 1 DE | 2020-12 | 1 DE-West    | 3 | 4 | 5.758621 | 1.12977  |
| 6  | 1 DE | 2020-12 | 1 DE-West    | 3 | 5 | 5.181818 | 1.640586 |
| 7  | 1 DE | 2020-12 | 2 DE-East    | 1 | 1 | 2.135351 | #####    |
| 8  | 1 DE | 2020-12 | 2 DE-East    | 1 | 2 | 2.342807 | #####    |
| 9  | 1 DE | 2020-12 | 2 DE-East    | 1 | 3 | 2.189571 | #####    |
| 10 | 1 DE | 2020-12 | 2 DE-East    | 1 | 4 | 1.935968 | #####    |
| 11 | 1 DE | 2020-12 | 2 DE-East    | 1 | 5 | 2.160225 | #####    |
| 12 | 1 DE | 2020-12 | 2 DE-East    | 2 | 1 | 1.950708 | #####    |
| 13 | 1 DE | 2020-12 | 2 DE-East    | 2 | 2 | 2.594595 | #####    |
| 14 | 1 DE | 2020-12 | 2 DE-East    | 2 | 3 | 2.113208 | #####    |
| 15 | 1 DE | 2020-12 | 2 DE-East    | 2 | 4 | 1.871795 | #####    |
| 16 | 1 DE | 2020-12 | 2 DE-East    | 2 | 5 | 1.416667 | #####    |
| 17 | 1 DE | 2020-12 | 2 DE-East    | 3 | 1 | 2.37375  | #####    |
| 18 | 1 DE | 2020-12 | 2 DE-East    | 3 | 2 | 2.076923 | #####    |
| 19 | 1 DE | 2020-12 | 2 DE-East    | 3 | 3 | 2.275862 | #####    |
| 20 | 1 DE | 2020-12 | 2 DE-East    | 3 | 4 | 2.058824 | #####    |
| 21 | 1 DE | 2020-12 | 2 DE-East    | 3 | 5 | 3        | 1.456948 |
| 22 | 1 DE | 2020-12 | 2 DE-East    | 3 | 5 | 3        | 1.456948 |
| 23 | 1 DE | 2020-12 | 2 DE-North   | 1 | 1 | 1.799372 | #####    |
| 24 | 1 DE | 2020-12 | 2 DE-North   | 1 | 2 | 1.801329 | #####    |
| 25 | 1 DE | 2020-12 | 2 DE-North   | 1 | 3 | 1.964704 | #####    |
| 26 | 1 DE | 2020-12 | 2 DE-North   | 1 | 4 | 1.976424 | #####    |
| 27 | 1 DE | 2020-12 | 2 DE-North   | 1 | 5 | 1.488841 | #####    |
| 28 | 1 DE | 2020-12 | 2 DE-North   | 2 | 1 | 1.660971 | #####    |
| 29 | 1 DE | 2020-12 | 2 DE-North   | 2 | 2 | 1.375    | #####    |
| 30 | 1 DE | 2020-12 | 2 DE-North   | 2 | 3 | 1.975    | #####    |
| 31 | 1 DE | 2020-12 | 2 DE-North   | 2 | 4 | 2        | #####    |
| 32 | 1 DE | 2020-12 | 2 DE-North   | 2 | 5 | 1.315789 | #####    |
| 33 | 1 DE | 2020-12 | 2 DE-North   | 3 | 1 | 1.991459 | #####    |
| 34 | 1 DE | 2020-12 | 2 DE-North   | 3 | 2 | 2.090909 | #####    |
| 35 | 1 DE | 2020-12 | 2 DE-North   | 3 | 3 | 1.954545 | #####    |
| 36 | 1 DE | 2020-12 | 2 DE-North   | 3 | 4 | 1.941176 | #####    |
| 37 | 1 DE | 2020-12 | 2 DE-North   | 3 | 5 | 2        | 1.224816 |
| 38 | 1 DE | 2020-12 | 2 DE-Overall | 1 | 1 | 1.899999 | #####    |
| 39 | 1 DE | 2020-12 | 2 DE-Overall | 1 | 2 | 2.068713 | #####    |
| 40 | 1 DE | 2020-12 | 2 DE-Overall | 1 | 3 | 1.989092 | #####    |
| 41 | 1 DE | 2020-12 | 2 DE-Overall | 1 | 4 | 2.032189 | #####    |
| 42 | 1 DE | 2020-12 | 2 DE-Overall | 1 | 5 | 1.446852 | #####    |
| 43 | 1 DE | 2020-12 | 2 DE-Overall | 2 | 1 | 1.913227 | #####    |
| 44 | 1 DE | 2020-12 | 2 DE-Overall | 2 | 2 | 2.181125 | #####    |
| 45 | 1 DE | 2020-12 | 2 DE-Overall | 2 | 3 | 2.037246 | #####    |
| 46 | 1 DE | 2020-12 | 2 DE-Overall | 2 | 4 | 2.209466 | #####    |
| 47 | 1 DE | 2020-12 | 2 DE-Overall | 2 | 5 | 1.257098 | #####    |
| 48 | 1 DE | 2020-12 | 2 DE-Overall | 3 | 1 | 1.884559 | #####    |
| 49 | 1 DE | 2020-12 | 2 DE-Overall | 3 | 2 | 1.981379 | #####    |
| 50 | 1 DE | 2020-12 | 2 DE-Overall | 3 | 3 | 1.933202 | #####    |
| 51 | 1 DE | 2020-12 | 2 DE-Overall | 3 | 4 | 1.822589 | #####    |
| 52 | 1 DE | 2020-12 | 2 DE-Overall | 3 | 5 | 1.774795 | #####    |
| 53 | 1 DE | 2020-12 | 2 DE-South   | 1 | 1 | 2.118415 | #####    |
| 54 | 1 DE | 2020-12 | 2 DE-South   | 1 | 2 | 2.358796 | #####    |
| 55 | 1 DE | 2020-12 | 2 DE-South   | 1 | 3 | 2.248374 | #####    |
| 56 | 1 DE | 2020-12 | 2 DE-South   | 1 | 4 | 2.302617 | #####    |
| 57 | 1 DE | 2020-12 | 2 DE-South   | 1 | 5 | 1.422789 | #####    |
| 58 | 1 DE | 2020-12 | 2 DE-South   | 2 | 1 | 2.158898 | #####    |
| 59 | 1 DE | 2020-12 | 2 DE-South   | 2 | 2 | 2.266667 | #####    |
| 60 | 1 DE | 2020-12 | 2 DE-South   | 2 | 2 | 2.266667 | #####    |

1  
2  
3  
4  
5  
6  
7  
8  
9  
10  
11  
12  
13  
14  
15  
16  
17  
18  
19  
20  
21  
22  
23  
24  
25  
26  
27  
28  
29  
30  
31  
32  
33  
34  
35  
36  
37  
38  
39  
40  
41  
42  
43  
44  
45  
46  
47  
48  
49  
50  
51  
52  
53  
54  
55  
56  
57  
58  
59  
60

|      |         |              |   |   |          |       |
|------|---------|--------------|---|---|----------|-------|
| 1 DE | 2020-12 | 2 DE-South   | 2 | 3 | 2.12     | ##### |
| 1 DE | 2020-12 | 2 DE-South   | 2 | 4 | 2.6      | ##### |
| 1 DE | 2020-12 | 2 DE-South   | 2 | 5 | 1.461538 | ##### |
| 1 DE | 2020-12 | 2 DE-South   | 3 | 1 | 2.069717 | ##### |
| 1 DE | 2020-12 | 2 DE-South   | 3 | 2 | 2.444444 | ##### |
| 1 DE | 2020-12 | 2 DE-South   | 3 | 3 | 2.416667 | ##### |
| 1 DE | 2020-12 | 2 DE-South   | 3 | 4 | 1.965517 | ##### |
| 1 DE | 2020-12 | 2 DE-South   | 3 | 5 | 1.363636 | ##### |
| 1 DE | 2020-12 | 2 DE-West    | 1 | 1 | 1.674774 | ##### |
| 1 DE | 2020-12 | 2 DE-West    | 1 | 2 | 1.910775 | ##### |
| 1 DE | 2020-12 | 2 DE-West    | 1 | 3 | 1.675426 | ##### |
| 1 DE | 2020-12 | 2 DE-West    | 1 | 4 | 1.860555 | ##### |
| 1 DE | 2020-12 | 2 DE-West    | 1 | 5 | 1.059164 | ##### |
| 1 DE | 2020-12 | 2 DE-West    | 2 | 1 | 1.812421 | ##### |
| 1 DE | 2020-12 | 2 DE-West    | 2 | 2 | 2.178571 | ##### |
| 1 DE | 2020-12 | 2 DE-West    | 2 | 3 | 1.95     | ##### |
| 1 DE | 2020-12 | 2 DE-West    | 2 | 4 | 2.119048 | ##### |
| 1 DE | 2020-12 | 2 DE-West    | 2 | 5 | 1        | ##### |
| 1 DE | 2020-12 | 2 DE-West    | 3 | 1 | 1.533871 | ##### |
| 1 DE | 2020-12 | 2 DE-West    | 3 | 2 | 1.730769 | ##### |
| 1 DE | 2020-12 | 2 DE-West    | 3 | 3 | 1.357143 | ##### |
| 1 DE | 2020-12 | 2 DE-West    | 3 | 4 | 1.617647 | ##### |
| 1 DE | 2020-12 | 2 DE-West    | 3 | 5 | 1.166667 | ##### |
| 1 DE | 2020-12 | 3 DE-East    | 1 | 1 | #####    | ##### |
| 1 DE | 2020-12 | 3 DE-East    | 1 | 2 | #####    | ##### |
| 1 DE | 2020-12 | 3 DE-East    | 1 | 3 | #####    | ##### |
| 1 DE | 2020-12 | 3 DE-East    | 1 | 4 | #####    | ##### |
| 1 DE | 2020-12 | 3 DE-East    | 1 | 5 | #####    | ##### |
| 1 DE | 2020-12 | 3 DE-East    | 2 | 1 | #####    | ##### |
| 1 DE | 2020-12 | 3 DE-East    | 2 | 2 | #####    | ##### |
| 1 DE | 2020-12 | 3 DE-East    | 2 | 3 | #####    | ##### |
| 1 DE | 2020-12 | 3 DE-East    | 2 | 4 | #####    | ##### |
| 1 DE | 2020-12 | 3 DE-East    | 2 | 5 | 0        | 0     |
| 1 DE | 2020-12 | 3 DE-East    | 3 | 1 | #####    | ##### |
| 1 DE | 2020-12 | 3 DE-East    | 3 | 2 | 0        | 0     |
| 1 DE | 2020-12 | 3 DE-East    | 3 | 3 | 0        | 0     |
| 1 DE | 2020-12 | 3 DE-East    | 3 | 4 | 0        | 0     |
| 1 DE | 2020-12 | 3 DE-East    | 3 | 5 | #####    | ##### |
| 1 DE | 2020-12 | 3 DE-North   | 1 | 1 | #####    | ##### |
| 1 DE | 2020-12 | 3 DE-North   | 1 | 2 | 0        | 0     |
| 1 DE | 2020-12 | 3 DE-North   | 1 | 3 | #####    | ##### |
| 1 DE | 2020-12 | 3 DE-North   | 1 | 4 | 0        | 0     |
| 1 DE | 2020-12 | 3 DE-North   | 1 | 5 | #####    | ##### |
| 1 DE | 2020-12 | 3 DE-North   | 2 | 1 | 0        | 0     |
| 1 DE | 2020-12 | 3 DE-North   | 2 | 2 | 0        | 0     |
| 1 DE | 2020-12 | 3 DE-North   | 2 | 3 | 0        | 0     |
| 1 DE | 2020-12 | 3 DE-North   | 2 | 4 | 0        | 0     |
| 1 DE | 2020-12 | 3 DE-North   | 2 | 5 | 0        | 0     |
| 1 DE | 2020-12 | 3 DE-North   | 3 | 1 | #####    | ##### |
| 1 DE | 2020-12 | 3 DE-North   | 3 | 2 | 0        | 0     |
| 1 DE | 2020-12 | 3 DE-North   | 3 | 3 | #####    | ##### |
| 1 DE | 2020-12 | 3 DE-North   | 3 | 4 | 0        | 0     |
| 1 DE | 2020-12 | 3 DE-North   | 3 | 5 | 0.125    | ##### |
| 1 DE | 2020-12 | 3 DE-Overall | 1 | 1 | #####    | ##### |
| 1 DE | 2020-12 | 3 DE-Overall | 1 | 2 | #####    | ##### |
| 1 DE | 2020-12 | 3 DE-Overall | 1 | 3 | #####    | ##### |

|    |      |         |              |   |   |          |          |  |
|----|------|---------|--------------|---|---|----------|----------|--|
| 1  |      |         |              |   |   |          |          |  |
| 2  |      |         |              |   |   |          |          |  |
| 3  | 1 DE | 2020-12 | 3 DE-Overall | 1 | 4 | #####    | #####    |  |
| 4  | 1 DE | 2020-12 | 3 DE-Overall | 1 | 5 | #####    | #####    |  |
| 5  | 1 DE | 2020-12 | 3 DE-Overall | 2 | 1 | #####    | #####    |  |
| 6  | 1 DE | 2020-12 | 3 DE-Overall | 2 | 2 | #####    | #####    |  |
| 7  | 1 DE | 2020-12 | 3 DE-Overall | 2 | 3 | #####    | #####    |  |
| 8  | 1 DE | 2020-12 | 3 DE-Overall | 2 | 4 | #####    | #####    |  |
| 9  | 1 DE | 2020-12 | 3 DE-Overall | 2 | 5 | #####    | #####    |  |
| 10 | 1 DE | 2020-12 | 3 DE-Overall | 3 | 1 | #####    | #####    |  |
| 11 | 1 DE | 2020-12 | 3 DE-Overall | 3 | 2 | #####    | #####    |  |
| 12 | 1 DE | 2020-12 | 3 DE-Overall | 3 | 3 | #####    | #####    |  |
| 13 | 1 DE | 2020-12 | 3 DE-Overall | 3 | 4 | #####    | #####    |  |
| 14 | 1 DE | 2020-12 | 3 DE-Overall | 3 | 5 | #####    | #####    |  |
| 15 | 1 DE | 2020-12 | 3 DE-South   | 1 | 1 | #####    | #####    |  |
| 16 | 1 DE | 2020-12 | 3 DE-South   | 1 | 2 | #####    | #####    |  |
| 17 | 1 DE | 2020-12 | 3 DE-South   | 1 | 3 | #####    | #####    |  |
| 18 | 1 DE | 2020-12 | 3 DE-South   | 1 | 4 | #####    | #####    |  |
| 19 | 1 DE | 2020-12 | 3 DE-South   | 1 | 5 | 0        | 0        |  |
| 20 | 1 DE | 2020-12 | 3 DE-South   | 2 | 1 | #####    | #####    |  |
| 21 | 1 DE | 2020-12 | 3 DE-South   | 2 | 2 | #####    | #####    |  |
| 22 | 1 DE | 2020-12 | 3 DE-South   | 2 | 3 | 0        | 0        |  |
| 23 | 1 DE | 2020-12 | 3 DE-South   | 2 | 4 | 0.5      | #####    |  |
| 24 | 1 DE | 2020-12 | 3 DE-South   | 2 | 5 | 0        | 0        |  |
| 25 | 1 DE | 2020-12 | 3 DE-South   | 3 | 1 | #####    | #####    |  |
| 26 | 1 DE | 2020-12 | 3 DE-South   | 3 | 2 | 0        | 0        |  |
| 27 | 1 DE | 2020-12 | 3 DE-South   | 3 | 3 | 0.12     | #####    |  |
| 28 | 1 DE | 2020-12 | 3 DE-South   | 3 | 4 | #####    | #####    |  |
| 29 | 1 DE | 2020-12 | 3 DE-South   | 3 | 5 | 0        | 0        |  |
| 30 | 1 DE | 2020-12 | 3 DE-West    | 1 | 1 | #####    | #####    |  |
| 31 | 1 DE | 2020-12 | 3 DE-West    | 1 | 2 | #####    | #####    |  |
| 32 | 1 DE | 2020-12 | 3 DE-West    | 1 | 3 | #####    | #####    |  |
| 33 | 1 DE | 2020-12 | 3 DE-West    | 1 | 4 | #####    | #####    |  |
| 34 | 1 DE | 2020-12 | 3 DE-West    | 1 | 5 | #####    | #####    |  |
| 35 | 1 DE | 2020-12 | 3 DE-West    | 2 | 1 | #####    | #####    |  |
| 36 | 1 DE | 2020-12 | 3 DE-West    | 2 | 2 | #####    | #####    |  |
| 37 | 1 DE | 2020-12 | 3 DE-West    | 2 | 3 | 0.05     | #####    |  |
| 38 | 1 DE | 2020-12 | 3 DE-West    | 2 | 4 | #####    | #####    |  |
| 39 | 1 DE | 2020-12 | 3 DE-West    | 2 | 5 | #####    | #####    |  |
| 40 | 1 DE | 2020-12 | 3 DE-West    | 3 | 1 | #####    | #####    |  |
| 41 | 1 DE | 2020-12 | 3 DE-West    | 3 | 2 | #####    | #####    |  |
| 42 | 1 DE | 2020-12 | 3 DE-West    | 3 | 3 | #####    | #####    |  |
| 43 | 1 DE | 2020-12 | 3 DE-West    | 3 | 4 | 0        | 0        |  |
| 44 | 1 DE | 2020-12 | 3 DE-West    | 3 | 5 | 0        | 0        |  |
| 45 | 1 DE | 2020-12 | 4 DE-East    | 1 | 1 | 2.488172 | #####    |  |
| 46 | 1 DE | 2020-12 | 4 DE-East    | 1 | 2 | 2.839365 | #####    |  |
| 47 | 1 DE | 2020-12 | 4 DE-East    | 1 | 3 | 3.44752  | #####    |  |
| 48 | 1 DE | 2020-12 | 4 DE-East    | 1 | 4 | 3.274753 | #####    |  |
| 49 | 1 DE | 2020-12 | 4 DE-East    | 1 | 5 | #####    | #####    |  |
| 50 | 1 DE | 2020-12 | 4 DE-East    | 2 | 1 | 2.38238  | #####    |  |
| 51 | 1 DE | 2020-12 | 4 DE-East    | 2 | 2 | 1.735294 | #####    |  |
| 52 | 1 DE | 2020-12 | 4 DE-East    | 2 | 3 | 3.744681 | #####    |  |
| 53 | 1 DE | 2020-12 | 4 DE-East    | 2 | 4 | 3.102564 | #####    |  |
| 54 | 1 DE | 2020-12 | 4 DE-East    | 2 | 5 | 0        | 0        |  |
| 55 | 1 DE | 2020-12 | 4 DE-East    | 3 | 1 | 2.627167 | #####    |  |
| 56 | 1 DE | 2020-12 | 4 DE-East    | 3 | 2 | 4        | 1.744139 |  |
| 57 | 1 DE | 2020-12 | 4 DE-East    | 3 | 3 | 3.115385 | #####    |  |
| 58 | 1 DE | 2020-12 | 4 DE-East    | 3 | 4 | 3.625    | 1.716007 |  |
| 59 | 1 DE | 2020-12 | 4 DE-East    | 3 | 4 | 3.625    | 1.716007 |  |
| 60 | 1 DE | 2020-12 | 4 DE-East    | 3 | 4 | 3.625    | 1.716007 |  |

|    |      |         |              |   |   |          |          |  |
|----|------|---------|--------------|---|---|----------|----------|--|
| 1  |      |         |              |   |   |          |          |  |
| 2  |      |         |              |   |   |          |          |  |
| 3  | 1 DE | 2020-12 | 4 DE-East    | 3 | 5 | #####    | #####    |  |
| 4  | 1 DE | 2020-12 | 4 DE-North   | 1 | 1 | 2.653199 | #####    |  |
| 5  | 1 DE | 2020-12 | 4 DE-North   | 1 | 2 | 3.634342 | 1.001679 |  |
| 6  | 1 DE | 2020-12 | 4 DE-North   | 1 | 3 | 4.61636  | #####    |  |
| 7  | 1 DE | 2020-12 | 4 DE-North   | 1 | 4 | 2.805582 | #####    |  |
| 8  | 1 DE | 2020-12 | 4 DE-North   | 1 | 5 | #####    | #####    |  |
| 9  | 1 DE | 2020-12 | 4 DE-North   | 2 | 1 | 1.974251 | #####    |  |
| 10 | 1 DE | 2020-12 | 4 DE-North   | 2 | 2 | 3.380952 | 1.562803 |  |
| 11 | 1 DE | 2020-12 | 4 DE-North   | 2 | 3 | 3.923077 | 1.056263 |  |
| 12 | 1 DE | 2020-12 | 4 DE-North   | 2 | 4 | 2.368421 | #####    |  |
| 13 | 1 DE | 2020-12 | 4 DE-North   | 2 | 5 | 0        | 0        |  |
| 14 | 1 DE | 2020-12 | 4 DE-North   | 3 | 1 | 3.622151 | #####    |  |
| 15 | 1 DE | 2020-12 | 4 DE-North   | 3 | 2 | 3.8      | 1.302382 |  |
| 16 | 1 DE | 2020-12 | 4 DE-North   | 3 | 3 | 5.35     | 1.637586 |  |
| 17 | 1 DE | 2020-12 | 4 DE-North   | 3 | 4 | 3.5      | 1.548779 |  |
| 18 | 1 DE | 2020-12 | 4 DE-North   | 3 | 5 | 0.5      | #####    |  |
| 19 | 1 DE | 2020-12 | 4 DE-Overall | 1 | 1 | 2.385202 | #####    |  |
| 20 | 1 DE | 2020-12 | 4 DE-Overall | 1 | 2 | 3.156875 | #####    |  |
| 21 | 1 DE | 2020-12 | 4 DE-Overall | 1 | 3 | 3.524819 | #####    |  |
| 22 | 1 DE | 2020-12 | 4 DE-Overall | 1 | 4 | 2.610214 | #####    |  |
| 23 | 1 DE | 2020-12 | 4 DE-Overall | 1 | 5 | #####    | #####    |  |
| 24 | 1 DE | 2020-12 | 4 DE-Overall | 2 | 1 | 2.174021 | #####    |  |
| 25 | 1 DE | 2020-12 | 4 DE-Overall | 2 | 2 | 3.481345 | #####    |  |
| 26 | 1 DE | 2020-12 | 4 DE-Overall | 2 | 3 | 3.129454 | #####    |  |
| 27 | 1 DE | 2020-12 | 4 DE-Overall | 2 | 4 | 2.466561 | #####    |  |
| 28 | 1 DE | 2020-12 | 4 DE-Overall | 2 | 5 | #####    | #####    |  |
| 29 | 1 DE | 2020-12 | 4 DE-Overall | 3 | 1 | 2.63319  | #####    |  |
| 30 | 1 DE | 2020-12 | 4 DE-Overall | 3 | 2 | 2.903945 | #####    |  |
| 31 | 1 DE | 2020-12 | 4 DE-Overall | 3 | 3 | 3.976952 | #####    |  |
| 32 | 1 DE | 2020-12 | 4 DE-Overall | 3 | 4 | 2.782762 | #####    |  |
| 33 | 1 DE | 2020-12 | 4 DE-Overall | 3 | 5 | #####    | #####    |  |
| 34 | 1 DE | 2020-12 | 4 DE-Overall | 3 | 1 | 2.832406 | #####    |  |
| 35 | 1 DE | 2020-12 | 4 DE-South   | 1 | 2 | 4.483754 | 1.011202 |  |
| 36 | 1 DE | 2020-12 | 4 DE-South   | 1 | 3 | 4.10215  | #####    |  |
| 37 | 1 DE | 2020-12 | 4 DE-South   | 1 | 4 | 2.688469 | #####    |  |
| 38 | 1 DE | 2020-12 | 4 DE-South   | 1 | 5 | #####    | #####    |  |
| 39 | 1 DE | 2020-12 | 4 DE-South   | 2 | 1 | 2.50293  | #####    |  |
| 40 | 1 DE | 2020-12 | 4 DE-South   | 2 | 2 | 4.073171 | #####    |  |
| 41 | 1 DE | 2020-12 | 4 DE-South   | 2 | 3 | 3.458333 | 1.026599 |  |
| 42 | 1 DE | 2020-12 | 4 DE-South   | 2 | 4 | 2.628571 | #####    |  |
| 43 | 1 DE | 2020-12 | 4 DE-South   | 2 | 5 | #####    | #####    |  |
| 44 | 1 DE | 2020-12 | 4 DE-South   | 3 | 1 | 3.211765 | #####    |  |
| 45 | 1 DE | 2020-12 | 4 DE-South   | 3 | 2 | 4.875    | 1.747589 |  |
| 46 | 1 DE | 2020-12 | 4 DE-South   | 3 | 3 | 4.88     | 1.540292 |  |
| 47 | 1 DE | 2020-12 | 4 DE-South   | 3 | 4 | 2.75     | #####    |  |
| 48 | 1 DE | 2020-12 | 4 DE-South   | 3 | 5 | 0        | 0        |  |
| 49 | 1 DE | 2020-12 | 4 DE-West    | 1 | 1 | 1.901835 | #####    |  |
| 50 | 1 DE | 2020-12 | 4 DE-West    | 1 | 2 | 2.474476 | #####    |  |
| 51 | 1 DE | 2020-12 | 4 DE-West    | 1 | 3 | 2.486189 | #####    |  |
| 52 | 1 DE | 2020-12 | 4 DE-West    | 1 | 4 | 2.192959 | #####    |  |
| 53 | 1 DE | 2020-12 | 4 DE-West    | 1 | 5 | #####    | #####    |  |
| 54 | 1 DE | 2020-12 | 4 DE-West    | 2 | 1 | 1.90275  | #####    |  |
| 55 | 1 DE | 2020-12 | 4 DE-West    | 2 | 2 | 3.730769 | #####    |  |
| 56 | 1 DE | 2020-12 | 4 DE-West    | 2 | 3 | 2.039216 | #####    |  |
| 57 | 1 DE | 2020-12 | 4 DE-West    | 2 | 4 | 2        | #####    |  |
| 58 | 1 DE | 2020-12 | 4 DE-West    | 2 | 5 | #####    | #####    |  |
| 59 | 1 DE | 2020-12 | 4 DE-West    | 2 | 5 | #####    | #####    |  |
| 60 | 1 DE | 2020-12 | 4 DE-West    | 2 | 5 | #####    | #####    |  |

|    |      |         |              |   |   |          |          |  |
|----|------|---------|--------------|---|---|----------|----------|--|
| 1  |      |         |              |   |   |          |          |  |
| 2  |      |         |              |   |   |          |          |  |
| 3  | 1 DE | 2020-12 | 4 DE-West    | 3 | 1 | 1.900873 | #####    |  |
| 4  | 1 DE | 2020-12 | 4 DE-West    | 3 | 2 | 1.625    | #####    |  |
| 5  | 1 DE | 2020-12 | 4 DE-West    | 3 | 3 | 3        | 1.078578 |  |
| 6  | 1 DE | 2020-12 | 4 DE-West    | 3 | 4 | 2.387097 | 1.063774 |  |
| 7  | 1 DE | 2020-12 | 4 DE-West    | 3 | 5 | 0        | 0        |  |
| 8  | 1 DE | 2020-12 | 5 DE-East    | 1 | 1 | 2.873491 | #####    |  |
| 9  | 1 DE | 2020-12 | 5 DE-East    | 1 | 2 | 2.698044 | #####    |  |
| 10 | 1 DE | 2020-12 | 5 DE-East    | 1 | 3 | 3.189217 | #####    |  |
| 11 | 1 DE | 2020-12 | 5 DE-East    | 1 | 4 | 2.644021 | #####    |  |
| 12 | 1 DE | 2020-12 | 5 DE-East    | 1 | 5 | 2.808215 | #####    |  |
| 13 | 1 DE | 2020-12 | 5 DE-East    | 2 | 1 | 2.754296 | #####    |  |
| 14 | 1 DE | 2020-12 | 5 DE-East    | 2 | 2 | 3.65625  | #####    |  |
| 15 | 1 DE | 2020-12 | 5 DE-East    | 2 | 3 | 2.980769 | #####    |  |
| 16 | 1 DE | 2020-12 | 5 DE-East    | 2 | 4 | 3.054054 | #####    |  |
| 17 | 1 DE | 2020-12 | 5 DE-East    | 2 | 5 | 1.5      | #####    |  |
| 18 | 1 DE | 2020-12 | 5 DE-East    | 3 | 1 | 3.028947 | #####    |  |
| 19 | 1 DE | 2020-12 | 5 DE-East    | 3 | 2 | 1.75     | #####    |  |
| 20 | 1 DE | 2020-12 | 5 DE-East    | 3 | 3 | 3.428571 | 1.112871 |  |
| 21 | 1 DE | 2020-12 | 5 DE-East    | 3 | 4 | 1.8      | #####    |  |
| 22 | 1 DE | 2020-12 | 5 DE-East    | 3 | 5 | 4.285714 | 1.572911 |  |
| 23 | 1 DE | 2020-12 | 5 DE-North   | 1 | 1 | 2.516715 | #####    |  |
| 24 | 1 DE | 2020-12 | 5 DE-North   | 1 | 2 | 3.410114 | #####    |  |
| 25 | 1 DE | 2020-12 | 5 DE-North   | 1 | 3 | 2.437992 | #####    |  |
| 26 | 1 DE | 2020-12 | 5 DE-North   | 1 | 4 | 2.922228 | #####    |  |
| 27 | 1 DE | 2020-12 | 5 DE-North   | 1 | 5 | 1.75558  | #####    |  |
| 28 | 1 DE | 2020-12 | 5 DE-North   | 2 | 1 | 2.339306 | #####    |  |
| 29 | 1 DE | 2020-12 | 5 DE-North   | 2 | 2 | 2.541667 | #####    |  |
| 30 | 1 DE | 2020-12 | 5 DE-North   | 2 | 3 | 1.9      | #####    |  |
| 31 | 1 DE | 2020-12 | 5 DE-North   | 2 | 4 | 3.421053 | 1.399163 |  |
| 32 | 1 DE | 2020-12 | 5 DE-North   | 2 | 5 | 1.842105 | #####    |  |
| 33 | 1 DE | 2020-12 | 5 DE-North   | 3 | 1 | 2.775274 | #####    |  |
| 34 | 1 DE | 2020-12 | 5 DE-North   | 3 | 2 | 4        | #####    |  |
| 35 | 1 DE | 2020-12 | 5 DE-North   | 3 | 3 | 3.052632 | 1.357267 |  |
| 36 | 1 DE | 2020-12 | 5 DE-North   | 3 | 4 | 2.176471 | #####    |  |
| 37 | 1 DE | 2020-12 | 5 DE-North   | 3 | 5 | 1.5      | #####    |  |
| 38 | 1 DE | 2020-12 | 5 DE-Overall | 1 | 1 | 2.793484 | #####    |  |
| 39 | 1 DE | 2020-12 | 5 DE-Overall | 1 | 2 | 3.017721 | #####    |  |
| 40 | 1 DE | 2020-12 | 5 DE-Overall | 1 | 3 | 3.006754 | #####    |  |
| 41 | 1 DE | 2020-12 | 5 DE-Overall | 1 | 4 | 3.103067 | #####    |  |
| 42 | 1 DE | 2020-12 | 5 DE-Overall | 1 | 5 | 1.906459 | #####    |  |
| 43 | 1 DE | 2020-12 | 5 DE-Overall | 2 | 1 | 2.635425 | #####    |  |
| 44 | 1 DE | 2020-12 | 5 DE-Overall | 2 | 2 | 3.086228 | #####    |  |
| 45 | 1 DE | 2020-12 | 5 DE-Overall | 2 | 3 | 2.956051 | #####    |  |
| 46 | 1 DE | 2020-12 | 5 DE-Overall | 2 | 4 | 3.350387 | #####    |  |
| 47 | 1 DE | 2020-12 | 5 DE-Overall | 2 | 5 | 1.193716 | #####    |  |
| 48 | 1 DE | 2020-12 | 5 DE-Overall | 3 | 1 | 2.980022 | #####    |  |
| 49 | 1 DE | 2020-12 | 5 DE-Overall | 3 | 2 | 2.966028 | #####    |  |
| 50 | 1 DE | 2020-12 | 5 DE-Overall | 3 | 3 | 3.065584 | #####    |  |
| 51 | 1 DE | 2020-12 | 5 DE-Overall | 3 | 4 | 2.800357 | #####    |  |
| 52 | 1 DE | 2020-12 | 5 DE-Overall | 3 | 5 | 3.173687 | #####    |  |
| 53 | 1 DE | 2020-12 | 5 DE-South   | 1 | 1 | 2.873897 | #####    |  |
| 54 | 1 DE | 2020-12 | 5 DE-South   | 1 | 2 | 2.970049 | #####    |  |
| 55 | 1 DE | 2020-12 | 5 DE-South   | 1 | 3 | 3.392431 | #####    |  |
| 56 | 1 DE | 2020-12 | 5 DE-South   | 1 | 4 | 3.552016 | #####    |  |
| 57 | 1 DE | 2020-12 | 5 DE-South   | 1 | 5 | 1.002989 | #####    |  |
| 58 | 1 DE | 2020-12 | 5 DE-South   | 1 | 1 | 2.441406 | #####    |  |
| 59 | 1 DE | 2020-12 | 5 DE-South   | 2 |   |          |          |  |
| 60 | 1 DE | 2020-12 | 5 DE-South   | 2 |   |          |          |  |

|    |      |         |              |   |   |          |          |  |
|----|------|---------|--------------|---|---|----------|----------|--|
| 1  |      |         |              |   |   |          |          |  |
| 2  |      |         |              |   |   |          |          |  |
| 3  | 1 DE | 2020-12 | 5 DE-South   | 2 | 2 | 2.4      | #####    |  |
| 4  | 1 DE | 2020-12 | 5 DE-South   | 2 | 3 | 3.137255 | #####    |  |
| 5  | 1 DE | 2020-12 | 5 DE-South   | 2 | 4 | 3.410256 | #####    |  |
| 6  | 1 DE | 2020-12 | 5 DE-South   | 2 | 5 | #####    | #####    |  |
| 7  | 1 DE | 2020-12 | 5 DE-South   | 3 | 1 | 3.393729 | #####    |  |
| 8  | 1 DE | 2020-12 | 5 DE-South   | 3 | 2 | 3.5      | 1.515951 |  |
| 9  | 1 DE | 2020-12 | 5 DE-South   | 3 | 3 | 3.72     | 1.261844 |  |
| 10 | 1 DE | 2020-12 | 5 DE-South   | 3 | 4 | 3.714286 | #####    |  |
| 11 | 1 DE | 2020-12 | 5 DE-South   | 3 | 5 | 2.181818 | #####    |  |
| 12 | 1 DE | 2020-12 | 5 DE-West    | 1 | 1 | 2.804728 | #####    |  |
| 13 | 1 DE | 2020-12 | 5 DE-West    | 1 | 2 | 3.025999 | #####    |  |
| 14 | 1 DE | 2020-12 | 5 DE-West    | 1 | 3 | 2.830416 | #####    |  |
| 15 | 1 DE | 2020-12 | 5 DE-West    | 1 | 4 | 2.963923 | #####    |  |
| 16 | 1 DE | 2020-12 | 5 DE-West    | 1 | 5 | 2.215857 | #####    |  |
| 17 | 1 DE | 2020-12 | 5 DE-West    | 2 | 1 | 2.865256 | #####    |  |
| 18 | 1 DE | 2020-12 | 5 DE-West    | 2 | 2 | 3.481481 | #####    |  |
| 19 | 1 DE | 2020-12 | 5 DE-West    | 2 | 3 | 3.267857 | #####    |  |
| 20 | 1 DE | 2020-12 | 5 DE-West    | 2 | 4 | 3.428571 | #####    |  |
| 21 | 1 DE | 2020-12 | 5 DE-West    | 2 | 5 | 1.315789 | #####    |  |
| 22 | 1 DE | 2020-12 | 5 DE-West    | 3 | 1 | 2.7424   | #####    |  |
| 23 | 1 DE | 2020-12 | 5 DE-West    | 3 | 2 | 2.730769 | #####    |  |
| 24 | 1 DE | 2020-12 | 5 DE-West    | 3 | 3 | 2.357143 | #####    |  |
| 25 | 1 DE | 2020-12 | 5 DE-West    | 3 | 4 | 2.5      | #####    |  |
| 26 | 1 DE | 2020-12 | 5 DE-West    | 3 | 5 | 4        | 1.605868 |  |
| 27 | 1 DE | 2020-13 | 1 DE-East    | 1 | 1 | 4.73471  | #####    |  |
| 28 | 1 DE | 2020-13 | 1 DE-East    | 1 | 2 | 6.221159 | #####    |  |
| 29 | 1 DE | 2020-13 | 1 DE-East    | 1 | 3 | 5.201312 | #####    |  |
| 30 | 1 DE | 2020-13 | 1 DE-East    | 1 | 4 | 5.727965 | #####    |  |
| 31 | 1 DE | 2020-13 | 1 DE-East    | 1 | 5 | 2.531334 | #####    |  |
| 32 | 1 DE | 2020-13 | 1 DE-East    | 2 | 1 | 4.017055 | #####    |  |
| 33 | 1 DE | 2020-13 | 1 DE-East    | 2 | 2 | 4.857143 | #####    |  |
| 34 | 1 DE | 2020-13 | 1 DE-East    | 2 | 3 | 4.815789 | #####    |  |
| 35 | 1 DE | 2020-13 | 1 DE-East    | 2 | 4 | 5.028846 | #####    |  |
| 36 | 1 DE | 2020-13 | 1 DE-East    | 2 | 5 | 2.347826 | #####    |  |
| 37 | 1 DE | 2020-13 | 1 DE-East    | 3 | 1 | 5.596576 | #####    |  |
| 38 | 1 DE | 2020-13 | 1 DE-East    | 3 | 2 | 7.526316 | 1.549585 |  |
| 39 | 1 DE | 2020-13 | 1 DE-East    | 3 | 3 | 5.484375 | #####    |  |
| 40 | 1 DE | 2020-13 | 1 DE-East    | 3 | 4 | 6.526316 | #####    |  |
| 41 | 1 DE | 2020-13 | 1 DE-East    | 3 | 5 | 2.928571 | #####    |  |
| 42 | 1 DE | 2020-13 | 1 DE-North   | 1 | 1 | 4.726278 | #####    |  |
| 43 | 1 DE | 2020-13 | 1 DE-North   | 1 | 2 | 4.629253 | #####    |  |
| 44 | 1 DE | 2020-13 | 1 DE-North   | 1 | 3 | 5.092608 | #####    |  |
| 45 | 1 DE | 2020-13 | 1 DE-North   | 1 | 4 | 5.733534 | #####    |  |
| 46 | 1 DE | 2020-13 | 1 DE-North   | 1 | 5 | 3.575461 | #####    |  |
| 47 | 1 DE | 2020-13 | 1 DE-North   | 2 | 1 | 4.247187 | #####    |  |
| 48 | 1 DE | 2020-13 | 1 DE-North   | 2 | 2 | 4.859375 | #####    |  |
| 49 | 1 DE | 2020-13 | 1 DE-North   | 2 | 3 | 3.876404 | #####    |  |
| 50 | 1 DE | 2020-13 | 1 DE-North   | 2 | 4 | 5.377358 | #####    |  |
| 51 | 1 DE | 2020-13 | 1 DE-North   | 2 | 5 | 3.44898  | #####    |  |
| 52 | 1 DE | 2020-13 | 1 DE-North   | 3 | 1 | 5.284141 | #####    |  |
| 53 | 1 DE | 2020-13 | 1 DE-North   | 3 | 2 | 4.4      | #####    |  |
| 54 | 1 DE | 2020-13 | 1 DE-North   | 3 | 3 | 6.369565 | 1.051372 |  |
| 55 | 1 DE | 2020-13 | 1 DE-North   | 3 | 4 | 6.065789 | #####    |  |
| 56 | 1 DE | 2020-13 | 1 DE-North   | 3 | 5 | 3.783784 | #####    |  |
| 57 | 1 DE | 2020-13 | 1 DE-Overall | 1 | 1 | 4.451999 | #####    |  |
| 58 | 1 DE | 2020-13 | 1 DE-Overall | 1 | 2 | 4.717726 | #####    |  |



|    |      |         |              |   |   |          |          |  |
|----|------|---------|--------------|---|---|----------|----------|--|
| 1  |      |         |              |   |   |          |          |  |
| 2  |      |         |              |   |   |          |          |  |
| 3  | 1 DE | 2020-13 | 1 DE-Overall | 1 | 3 | 5.453923 | #####    |  |
| 4  | 1 DE | 2020-13 | 1 DE-Overall | 1 | 4 | 5.084312 | #####    |  |
| 5  | 1 DE | 2020-13 | 1 DE-Overall | 1 | 5 | 2.909561 | #####    |  |
| 6  | 1 DE | 2020-13 | 1 DE-Overall | 2 | 1 | 4.012569 | #####    |  |
| 7  | 1 DE | 2020-13 | 1 DE-Overall | 2 | 2 | 4.691259 | #####    |  |
| 8  | 1 DE | 2020-13 | 1 DE-Overall | 2 | 3 | 4.970571 | #####    |  |
| 9  | 1 DE | 2020-13 | 1 DE-Overall | 2 | 4 | 4.683371 | #####    |  |
| 10 | 1 DE | 2020-13 | 1 DE-Overall | 2 | 5 | 2.650251 | #####    |  |
| 11 | 1 DE | 2020-13 | 1 DE-Overall | 3 | 1 | 4.921315 | #####    |  |
| 12 | 1 DE | 2020-13 | 1 DE-Overall | 3 | 2 | 4.739521 | #####    |  |
| 13 | 1 DE | 2020-13 | 1 DE-Overall | 3 | 3 | 5.899034 | #####    |  |
| 14 | 1 DE | 2020-13 | 1 DE-Overall | 3 | 4 | 5.46612  | #####    |  |
| 15 | 1 DE | 2020-13 | 1 DE-Overall | 3 | 5 | 3.298609 | #####    |  |
| 16 | 1 DE | 2020-13 | 1 DE-South   | 1 | 1 | 4.161208 | #####    |  |
| 17 | 1 DE | 2020-13 | 1 DE-South   | 1 | 2 | 4.452861 | #####    |  |
| 18 | 1 DE | 2020-13 | 1 DE-South   | 1 | 3 | 5.07935  | #####    |  |
| 19 | 1 DE | 2020-13 | 1 DE-South   | 1 | 4 | 4.628554 | #####    |  |
| 20 | 1 DE | 2020-13 | 1 DE-South   | 1 | 5 | 2.797643 | #####    |  |
| 21 | 1 DE | 2020-13 | 1 DE-South   | 2 | 1 | 4.166659 | #####    |  |
| 22 | 1 DE | 2020-13 | 1 DE-South   | 2 | 2 | 4.690909 | #####    |  |
| 23 | 1 DE | 2020-13 | 1 DE-South   | 2 | 3 | 5.266667 | #####    |  |
| 24 | 1 DE | 2020-13 | 1 DE-South   | 2 | 4 | 4.386364 | #####    |  |
| 25 | 1 DE | 2020-13 | 1 DE-South   | 2 | 5 | 2.90625  | #####    |  |
| 26 | 1 DE | 2020-13 | 1 DE-South   | 3 | 1 | 4.156182 | #####    |  |
| 27 | 1 DE | 2020-13 | 1 DE-South   | 3 | 2 | 4.25     | 1.000492 |  |
| 28 | 1 DE | 2020-13 | 1 DE-South   | 3 | 3 | 4.934426 | #####    |  |
| 29 | 1 DE | 2020-13 | 1 DE-South   | 3 | 4 | 4.893939 | #####    |  |
| 30 | 1 DE | 2020-13 | 1 DE-South   | 3 | 5 | 2.702128 | #####    |  |
| 31 | 1 DE | 2020-13 | 1 DE-South   | 3 | 1 | 4.383433 | #####    |  |
| 32 | 1 DE | 2020-13 | 1 DE-West    | 1 | 2 | 4.373259 | #####    |  |
| 33 | 1 DE | 2020-13 | 1 DE-West    | 1 | 3 | 6.053199 | #####    |  |
| 34 | 1 DE | 2020-13 | 1 DE-West    | 1 | 4 | 4.718104 | #####    |  |
| 35 | 1 DE | 2020-13 | 1 DE-West    | 1 | 5 | 2.809921 | #####    |  |
| 36 | 1 DE | 2020-13 | 1 DE-West    | 2 | 1 | 3.765529 | #####    |  |
| 37 | 1 DE | 2020-13 | 1 DE-West    | 2 | 2 | 4.509091 | #####    |  |
| 38 | 1 DE | 2020-13 | 1 DE-West    | 2 | 3 | 5.386555 | #####    |  |
| 39 | 1 DE | 2020-13 | 1 DE-West    | 2 | 4 | 4.30137  | #####    |  |
| 40 | 1 DE | 2020-13 | 1 DE-West    | 2 | 5 | 2.241935 | #####    |  |
| 41 | 1 DE | 2020-13 | 1 DE-West    | 3 | 1 | 5.048438 | #####    |  |
| 42 | 1 DE | 2020-13 | 1 DE-West    | 3 | 2 | 4.28     | #####    |  |
| 43 | 1 DE | 2020-13 | 1 DE-West    | 3 | 3 | 6.793103 | #####    |  |
| 44 | 1 DE | 2020-13 | 1 DE-West    | 3 | 4 | 5.026667 | #####    |  |
| 45 | 1 DE | 2020-13 | 1 DE-West    | 3 | 5 | 3.846154 | #####    |  |
| 46 | 1 DE | 2020-13 | 2 DE-East    | 1 | 1 | 1.531972 | #####    |  |
| 47 | 1 DE | 2020-13 | 2 DE-East    | 1 | 2 | 2.255355 | #####    |  |
| 48 | 1 DE | 2020-13 | 2 DE-East    | 1 | 3 | 1.754854 | #####    |  |
| 49 | 1 DE | 2020-13 | 2 DE-East    | 1 | 4 | 1.517798 | #####    |  |
| 50 | 1 DE | 2020-13 | 2 DE-East    | 1 | 5 | 1.100504 | #####    |  |
| 51 | 1 DE | 2020-13 | 2 DE-East    | 2 | 1 | 1.494869 | #####    |  |
| 52 | 1 DE | 2020-13 | 2 DE-East    | 2 | 2 | 2.27451  | #####    |  |
| 53 | 1 DE | 2020-13 | 2 DE-East    | 2 | 3 | 1.948718 | #####    |  |
| 54 | 1 DE | 2020-13 | 2 DE-East    | 2 | 4 | 1.4375   | #####    |  |
| 55 | 1 DE | 2020-13 | 2 DE-East    | 2 | 5 | 1.130435 | #####    |  |
| 56 | 1 DE | 2020-13 | 2 DE-East    | 3 | 1 | 1.574348 | #####    |  |
| 57 | 1 DE | 2020-13 | 2 DE-East    | 3 | 2 | 2.238095 | #####    |  |
| 58 | 1 DE | 2020-13 | 2 DE-East    | 3 | 3 | 1.625    | #####    |  |
| 59 | 1 DE | 2020-13 | 2 DE-East    | 3 | 3 | 1.625    | #####    |  |
| 60 | 1 DE | 2020-13 | 2 DE-East    | 3 | 3 | 1.625    | #####    |  |

1  
2  
3  
4  
5  
6  
7  
8  
9  
10  
11  
12  
13  
14  
15  
16  
17  
18  
19  
20  
21  
22  
23  
24  
25  
26  
27  
28  
29  
30  
31  
32  
33  
34  
35  
36  
37  
38  
39  
40  
41  
42  
43  
44  
45  
46  
47  
48  
49  
50  
51  
52  
53  
54  
55  
56  
57  
58  
59  
60

|      |         |              |   |   |          |       |
|------|---------|--------------|---|---|----------|-------|
| 1 DE | 2020-13 | 2 DE-East    | 3 | 4 | 1.607143 | ##### |
| 1 DE | 2020-13 | 2 DE-East    | 3 | 5 | 1.035714 | ##### |
| 1 DE | 2020-13 | 2 DE-North   | 1 | 1 | 1.516257 | ##### |
| 1 DE | 2020-13 | 2 DE-North   | 1 | 2 | 1.835138 | ##### |
| 1 DE | 2020-13 | 2 DE-North   | 1 | 3 | 1.730989 | ##### |
| 1 DE | 2020-13 | 2 DE-North   | 1 | 4 | 1.635019 | ##### |
| 1 DE | 2020-13 | 2 DE-North   | 1 | 5 | 1.112055 | ##### |
| 1 DE | 2020-13 | 2 DE-North   | 2 | 1 | 1.51788  | ##### |
| 1 DE | 2020-13 | 2 DE-North   | 2 | 2 | 1.893939 | ##### |
| 1 DE | 2020-13 | 2 DE-North   | 2 | 3 | 1.873684 | ##### |
| 1 DE | 2020-13 | 2 DE-North   | 2 | 4 | 1.654545 | ##### |
| 1 DE | 2020-13 | 2 DE-North   | 2 | 5 | 1.081633 | ##### |
| 1 DE | 2020-13 | 2 DE-North   | 3 | 1 | 1.514403 | ##### |
| 1 DE | 2020-13 | 2 DE-North   | 3 | 2 | 1.782609 | ##### |
| 1 DE | 2020-13 | 2 DE-North   | 3 | 3 | 1.574468 | ##### |
| 1 DE | 2020-13 | 2 DE-North   | 3 | 4 | 1.617284 | ##### |
| 1 DE | 2020-13 | 2 DE-North   | 3 | 5 | 1.162162 | ##### |
| 1 DE | 2020-13 | 2 DE-Overall | 1 | 1 | 1.557906 | ##### |
| 1 DE | 2020-13 | 2 DE-Overall | 1 | 2 | 2.137272 | ##### |
| 1 DE | 2020-13 | 2 DE-Overall | 1 | 3 | 1.864408 | ##### |
| 1 DE | 2020-13 | 2 DE-Overall | 1 | 4 | 1.490929 | ##### |
| 1 DE | 2020-13 | 2 DE-Overall | 1 | 5 | 1.156585 | ##### |
| 1 DE | 2020-13 | 2 DE-Overall | 2 | 1 | 1.540922 | ##### |
| 1 DE | 2020-13 | 2 DE-Overall | 2 | 2 | 2.24233  | ##### |
| 1 DE | 2020-13 | 2 DE-Overall | 2 | 3 | 2.035586 | ##### |
| 1 DE | 2020-13 | 2 DE-Overall | 2 | 4 | 1.438463 | ##### |
| 1 DE | 2020-13 | 2 DE-Overall | 2 | 5 | 1.113833 | ##### |
| 1 DE | 2020-13 | 2 DE-Overall | 3 | 1 | 1.575745 | ##### |
| 1 DE | 2020-13 | 2 DE-Overall | 3 | 2 | 2.054048 | ##### |
| 1 DE | 2020-13 | 2 DE-Overall | 3 | 3 | 1.710045 | ##### |
| 1 DE | 2020-13 | 2 DE-Overall | 3 | 4 | 1.541276 | ##### |
| 1 DE | 2020-13 | 2 DE-Overall | 3 | 5 | 1.219765 | ##### |
| 1 DE | 2020-13 | 2 DE-South   | 1 | 1 | 1.523683 | ##### |
| 1 DE | 2020-13 | 2 DE-South   | 1 | 2 | 2.022335 | ##### |
| 1 DE | 2020-13 | 2 DE-South   | 1 | 3 | 1.765236 | ##### |
| 1 DE | 2020-13 | 2 DE-South   | 1 | 4 | 1.418672 | ##### |
| 1 DE | 2020-13 | 2 DE-South   | 1 | 5 | 1.269373 | ##### |
| 1 DE | 2020-13 | 2 DE-South   | 2 | 1 | 1.527381 | ##### |
| 1 DE | 2020-13 | 2 DE-South   | 2 | 2 | 2.196429 | ##### |
| 1 DE | 2020-13 | 2 DE-South   | 2 | 3 | 2.141026 | ##### |
| 1 DE | 2020-13 | 2 DE-South   | 2 | 4 | 1.222222 | ##### |
| 1 DE | 2020-13 | 2 DE-South   | 2 | 5 | 1.25     | ##### |
| 1 DE | 2020-13 | 2 DE-South   | 3 | 1 | 1.520363 | ##### |
| 1 DE | 2020-13 | 2 DE-South   | 3 | 2 | 1.892857 | ##### |
| 1 DE | 2020-13 | 2 DE-South   | 3 | 3 | 1.467742 | ##### |
| 1 DE | 2020-13 | 2 DE-South   | 3 | 4 | 1.632353 | ##### |
| 1 DE | 2020-13 | 2 DE-South   | 3 | 5 | 1.285714 | ##### |
| 1 DE | 2020-13 | 2 DE-West    | 1 | 1 | 1.622013 | ##### |
| 1 DE | 2020-13 | 2 DE-West    | 1 | 2 | 2.339492 | ##### |
| 1 DE | 2020-13 | 2 DE-West    | 1 | 3 | 2.060405 | ##### |
| 1 DE | 2020-13 | 2 DE-West    | 1 | 4 | 1.460415 | ##### |
| 1 DE | 2020-13 | 2 DE-West    | 1 | 5 | 1.122039 | ##### |
| 1 DE | 2020-13 | 2 DE-West    | 2 | 1 | 1.589846 | ##### |
| 1 DE | 2020-13 | 2 DE-West    | 2 | 2 | 2.474576 | ##### |
| 1 DE | 2020-13 | 2 DE-West    | 2 | 3 | 2.088    | ##### |
| 1 DE | 2020-13 | 2 DE-West    | 2 | 4 | 1.55     | ##### |

|    |      |         |              |   |   |          |       |  |
|----|------|---------|--------------|---|---|----------|-------|--|
| 1  |      |         |              |   |   |          |       |  |
| 2  |      |         |              |   |   |          |       |  |
| 3  | 1 DE | 2020-13 | 2 DE-West    | 2 | 5 | 1.048387 | ##### |  |
| 4  | 1 DE | 2020-13 | 2 DE-West    | 3 | 1 | 1.656948 | ##### |  |
| 5  | 1 DE | 2020-13 | 2 DE-West    | 3 | 2 | 2.24     | ##### |  |
| 6  | 1 DE | 2020-13 | 2 DE-West    | 3 | 3 | 2.03125  | ##### |  |
| 7  | 1 DE | 2020-13 | 2 DE-West    | 3 | 4 | 1.38961  | ##### |  |
| 8  | 1 DE | 2020-13 | 2 DE-West    | 3 | 5 | 1.25641  | ##### |  |
| 9  | 1 DE | 2020-13 | 3 DE-East    | 1 | 1 | #####    | ##### |  |
| 10 | 1 DE | 2020-13 | 3 DE-East    | 1 | 2 | 0        | 0     |  |
| 11 | 1 DE | 2020-13 | 3 DE-East    | 1 | 3 | 0        | 0     |  |
| 12 | 1 DE | 2020-13 | 3 DE-East    | 1 | 4 | #####    | ##### |  |
| 13 | 1 DE | 2020-13 | 3 DE-East    | 1 | 5 | #####    | ##### |  |
| 14 | 1 DE | 2020-13 | 3 DE-East    | 2 | 1 | 0        | 0     |  |
| 15 | 1 DE | 2020-13 | 3 DE-East    | 2 | 2 | 0        | 0     |  |
| 16 | 1 DE | 2020-13 | 3 DE-East    | 2 | 3 | 0        | 0     |  |
| 17 | 1 DE | 2020-13 | 3 DE-East    | 2 | 4 | 0        | 0     |  |
| 18 | 1 DE | 2020-13 | 3 DE-East    | 2 | 5 | 0        | 0     |  |
| 19 | 1 DE | 2020-13 | 3 DE-East    | 3 | 1 | #####    | ##### |  |
| 20 | 1 DE | 2020-13 | 3 DE-East    | 3 | 2 | 0        | 0     |  |
| 21 | 1 DE | 2020-13 | 3 DE-East    | 3 | 3 | 0        | 0     |  |
| 22 | 1 DE | 2020-13 | 3 DE-East    | 3 | 4 | #####    | ##### |  |
| 23 | 1 DE | 2020-13 | 3 DE-East    | 3 | 5 | #####    | ##### |  |
| 24 | 1 DE | 2020-13 | 3 DE-East    | 3 | 1 | #####    | ##### |  |
| 25 | 1 DE | 2020-13 | 3 DE-North   | 1 | 1 | #####    | ##### |  |
| 26 | 1 DE | 2020-13 | 3 DE-North   | 1 | 2 | 0        | 0     |  |
| 27 | 1 DE | 2020-13 | 3 DE-North   | 1 | 3 | #####    | ##### |  |
| 28 | 1 DE | 2020-13 | 3 DE-North   | 1 | 4 | #####    | ##### |  |
| 29 | 1 DE | 2020-13 | 3 DE-North   | 1 | 5 | #####    | ##### |  |
| 30 | 1 DE | 2020-13 | 3 DE-North   | 2 | 1 | #####    | ##### |  |
| 31 | 1 DE | 2020-13 | 3 DE-North   | 2 | 2 | 0        | 0     |  |
| 32 | 1 DE | 2020-13 | 3 DE-North   | 2 | 3 | #####    | ##### |  |
| 33 | 1 DE | 2020-13 | 3 DE-North   | 2 | 4 | 0        | 0     |  |
| 34 | 1 DE | 2020-13 | 3 DE-North   | 2 | 5 | 0        | 0     |  |
| 35 | 1 DE | 2020-13 | 3 DE-North   | 3 | 1 | #####    | ##### |  |
| 36 | 1 DE | 2020-13 | 3 DE-North   | 3 | 2 | 0        | 0     |  |
| 37 | 1 DE | 2020-13 | 3 DE-North   | 3 | 3 | #####    | ##### |  |
| 38 | 1 DE | 2020-13 | 3 DE-North   | 3 | 4 | #####    | ##### |  |
| 39 | 1 DE | 2020-13 | 3 DE-North   | 3 | 5 | #####    | ##### |  |
| 40 | 1 DE | 2020-13 | 3 DE-Overall | 1 | 1 | #####    | ##### |  |
| 41 | 1 DE | 2020-13 | 3 DE-Overall | 1 | 2 | #####    | ##### |  |
| 42 | 1 DE | 2020-13 | 3 DE-Overall | 1 | 3 | #####    | ##### |  |
| 43 | 1 DE | 2020-13 | 3 DE-Overall | 1 | 4 | #####    | ##### |  |
| 44 | 1 DE | 2020-13 | 3 DE-Overall | 1 | 5 | #####    | ##### |  |
| 45 | 1 DE | 2020-13 | 3 DE-Overall | 2 | 1 | #####    | ##### |  |
| 46 | 1 DE | 2020-13 | 3 DE-Overall | 2 | 2 | #####    | ##### |  |
| 47 | 1 DE | 2020-13 | 3 DE-Overall | 2 | 3 | #####    | ##### |  |
| 48 | 1 DE | 2020-13 | 3 DE-Overall | 2 | 4 | #####    | ##### |  |
| 49 | 1 DE | 2020-13 | 3 DE-Overall | 2 | 5 | #####    | ##### |  |
| 50 | 1 DE | 2020-13 | 3 DE-Overall | 3 | 1 | #####    | ##### |  |
| 51 | 1 DE | 2020-13 | 3 DE-Overall | 3 | 2 | 0        | 0     |  |
| 52 | 1 DE | 2020-13 | 3 DE-Overall | 3 | 3 | #####    | ##### |  |
| 53 | 1 DE | 2020-13 | 3 DE-Overall | 3 | 4 | #####    | ##### |  |
| 54 | 1 DE | 2020-13 | 3 DE-Overall | 3 | 5 | #####    | ##### |  |
| 55 | 1 DE | 2020-13 | 3 DE-South   | 1 | 1 | #####    | ##### |  |
| 56 | 1 DE | 2020-13 | 3 DE-South   | 1 | 2 | 0        | 0     |  |
| 57 | 1 DE | 2020-13 | 3 DE-South   | 1 | 3 | #####    | ##### |  |
| 58 | 1 DE | 2020-13 | 3 DE-South   | 1 | 4 | #####    | ##### |  |
| 59 | 1 DE | 2020-13 | 3 DE-South   | 1 | 5 | #####    | ##### |  |
| 60 | 1 DE | 2020-13 | 3 DE-South   | 1 | 5 | #####    | ##### |  |

1  
2  
3  
4  
5  
6  
7  
8  
9  
10  
11  
12  
13  
14  
15  
16  
17  
18  
19  
20  
21  
22  
23  
24  
25  
26  
27  
28  
29  
30  
31  
32  
33  
34  
35  
36  
37  
38  
39  
40  
41  
42  
43  
44  
45  
46  
47  
48  
49  
50  
51  
52  
53  
54  
55  
56  
57  
58  
59  
60

|      |         |              |   |   |          |          |
|------|---------|--------------|---|---|----------|----------|
| 1 DE | 2020-13 | 3 DE-South   | 2 | 1 | #####    | #####    |
| 1 DE | 2020-13 | 3 DE-South   | 2 | 2 | 0        | 0        |
| 1 DE | 2020-13 | 3 DE-South   | 2 | 3 | #####    | #####    |
| 1 DE | 2020-13 | 3 DE-South   | 2 | 4 | #####    | #####    |
| 1 DE | 2020-13 | 3 DE-South   | 2 | 5 | #####    | #####    |
| 1 DE | 2020-13 | 3 DE-South   | 3 | 1 | #####    | #####    |
| 1 DE | 2020-13 | 3 DE-South   | 3 | 2 | 0        | 0        |
| 1 DE | 2020-13 | 3 DE-South   | 3 | 3 | #####    | #####    |
| 1 DE | 2020-13 | 3 DE-South   | 3 | 4 | #####    | #####    |
| 1 DE | 2020-13 | 3 DE-South   | 3 | 5 | #####    | #####    |
| 1 DE | 2020-13 | 3 DE-West    | 1 | 1 | #####    | #####    |
| 1 DE | 2020-13 | 3 DE-West    | 1 | 2 | #####    | #####    |
| 1 DE | 2020-13 | 3 DE-West    | 1 | 3 | #####    | #####    |
| 1 DE | 2020-13 | 3 DE-West    | 1 | 4 | #####    | #####    |
| 1 DE | 2020-13 | 3 DE-West    | 1 | 5 | #####    | #####    |
| 1 DE | 2020-13 | 3 DE-West    | 2 | 1 | #####    | #####    |
| 1 DE | 2020-13 | 3 DE-West    | 2 | 2 | #####    | #####    |
| 1 DE | 2020-13 | 3 DE-West    | 2 | 3 | 0.08     | #####    |
| 1 DE | 2020-13 | 3 DE-West    | 2 | 4 | 0.0375   | #####    |
| 1 DE | 2020-13 | 3 DE-West    | 2 | 5 | #####    | #####    |
| 1 DE | 2020-13 | 3 DE-West    | 3 | 1 | #####    | #####    |
| 1 DE | 2020-13 | 3 DE-West    | 3 | 2 | 0        | 0        |
| 1 DE | 2020-13 | 3 DE-West    | 3 | 3 | 0        | 0        |
| 1 DE | 2020-13 | 3 DE-West    | 3 | 4 | 0        | 0        |
| 1 DE | 2020-13 | 3 DE-West    | 3 | 5 | #####    | #####    |
| 1 DE | 2020-13 | 4 DE-East    | 1 | 1 | 1.54085  | #####    |
| 1 DE | 2020-13 | 4 DE-East    | 1 | 2 | 3.155765 | #####    |
| 1 DE | 2020-13 | 4 DE-East    | 1 | 3 | 2.055631 | #####    |
| 1 DE | 2020-13 | 4 DE-East    | 1 | 4 | 1.893695 | #####    |
| 1 DE | 2020-13 | 4 DE-East    | 1 | 5 | #####    | #####    |
| 1 DE | 2020-13 | 4 DE-East    | 2 | 1 | #####    | #####    |
| 1 DE | 2020-13 | 4 DE-East    | 2 | 2 | 1.346939 | #####    |
| 1 DE | 2020-13 | 4 DE-East    | 2 | 3 | 1.302632 | #####    |
| 1 DE | 2020-13 | 4 DE-East    | 2 | 4 | 1.542056 | #####    |
| 1 DE | 2020-13 | 4 DE-East    | 2 | 5 | #####    | #####    |
| 1 DE | 2020-13 | 4 DE-East    | 3 | 1 | 2.21924  | #####    |
| 1 DE | 2020-13 | 4 DE-East    | 3 | 2 | 4.8      | 1.511048 |
| 1 DE | 2020-13 | 4 DE-East    | 3 | 3 | 2.6      | #####    |
| 1 DE | 2020-13 | 4 DE-East    | 3 | 4 | 2.291139 | #####    |
| 1 DE | 2020-13 | 4 DE-East    | 3 | 5 | #####    | #####    |
| 1 DE | 2020-13 | 4 DE-North   | 1 | 1 | 1.468561 | #####    |
| 1 DE | 2020-13 | 4 DE-North   | 1 | 2 | 1.29161  | #####    |
| 1 DE | 2020-13 | 4 DE-North   | 1 | 3 | 1.928773 | #####    |
| 1 DE | 2020-13 | 4 DE-North   | 1 | 4 | 2.698739 | #####    |
| 1 DE | 2020-13 | 4 DE-North   | 1 | 5 | #####    | #####    |
| 1 DE | 2020-13 | 4 DE-North   | 2 | 1 | #####    | #####    |
| 1 DE | 2020-13 | 4 DE-North   | 2 | 2 | 1.046875 | #####    |
| 1 DE | 2020-13 | 4 DE-North   | 2 | 3 | 1.022222 | #####    |
| 1 DE | 2020-13 | 4 DE-North   | 2 | 4 | 1.888889 | #####    |
| 1 DE | 2020-13 | 4 DE-North   | 2 | 5 | #####    | #####    |
| 1 DE | 2020-13 | 4 DE-North   | 3 | 1 | 2.114215 | #####    |
| 1 DE | 2020-13 | 4 DE-North   | 3 | 2 | 1.52381  | #####    |
| 1 DE | 2020-13 | 4 DE-North   | 3 | 3 | 2.891304 | #####    |
| 1 DE | 2020-13 | 4 DE-North   | 3 | 4 | 3.448718 | #####    |
| 1 DE | 2020-13 | 4 DE-North   | 3 | 5 | 0        | 0        |
| 1 DE | 2020-13 | 4 DE-Overall | 1 | 1 | 1.454135 | #####    |

|    |      |         |              |   |   |          |       |  |
|----|------|---------|--------------|---|---|----------|-------|--|
| 1  |      |         |              |   |   |          |       |  |
| 2  |      |         |              |   |   |          |       |  |
| 3  | 1 DE | 2020-13 | 4 DE-Overall | 1 | 2 | 1.621483 | ##### |  |
| 4  | 1 DE | 2020-13 | 4 DE-Overall | 1 | 3 | 2.167158 | ##### |  |
| 5  | 1 DE | 2020-13 | 4 DE-Overall | 1 | 4 | 2.08532  | ##### |  |
| 6  | 1 DE | 2020-13 | 4 DE-Overall | 1 | 5 | #####    | ##### |  |
| 7  | 1 DE | 2020-13 | 4 DE-Overall | 2 | 1 | 1.113044 | ##### |  |
| 8  | 1 DE | 2020-13 | 4 DE-Overall | 2 | 2 | 1.279591 | ##### |  |
| 9  | 1 DE | 2020-13 | 4 DE-Overall | 2 | 3 | 1.451393 | ##### |  |
| 10 | 1 DE | 2020-13 | 4 DE-Overall | 2 | 4 | 1.859048 | ##### |  |
| 11 | 1 DE | 2020-13 | 4 DE-Overall | 2 | 5 | #####    | ##### |  |
| 12 | 1 DE | 2020-13 | 4 DE-Overall | 3 | 1 | 1.818034 | ##### |  |
| 13 | 1 DE | 2020-13 | 4 DE-Overall | 3 | 2 | 1.89732  | ##### |  |
| 14 | 1 DE | 2020-13 | 4 DE-Overall | 3 | 3 | 2.827649 | ##### |  |
| 15 | 1 DE | 2020-13 | 4 DE-Overall | 3 | 4 | 2.301889 | ##### |  |
| 16 | 1 DE | 2020-13 | 4 DE-Overall | 3 | 5 | #####    | ##### |  |
| 17 | 1 DE | 2020-13 | 4 DE-South   | 1 | 1 | 1.483505 | ##### |  |
| 18 | 1 DE | 2020-13 | 4 DE-South   | 1 | 2 | 1.905471 | ##### |  |
| 19 | 1 DE | 2020-13 | 4 DE-South   | 1 | 3 | 2.110688 | ##### |  |
| 20 | 1 DE | 2020-13 | 4 DE-South   | 1 | 4 | 2.026632 | ##### |  |
| 21 | 1 DE | 2020-13 | 4 DE-South   | 1 | 5 | #####    | ##### |  |
| 22 | 1 DE | 2020-13 | 4 DE-South   | 2 | 1 | 1.433218 | ##### |  |
| 23 | 1 DE | 2020-13 | 4 DE-South   | 2 | 2 | 1.545455 | ##### |  |
| 24 | 1 DE | 2020-13 | 4 DE-South   | 2 | 3 | 1.533333 | ##### |  |
| 25 | 1 DE | 2020-13 | 4 DE-South   | 2 | 4 | 2.147727 | ##### |  |
| 26 | 1 DE | 2020-13 | 4 DE-South   | 2 | 5 | #####    | ##### |  |
| 27 | 1 DE | 2020-13 | 4 DE-South   | 3 | 1 | 1.52977  | ##### |  |
| 28 | 1 DE | 2020-13 | 4 DE-South   | 3 | 2 | 2.2      | ##### |  |
| 29 | 1 DE | 2020-13 | 4 DE-South   | 3 | 3 | 2.557377 | ##### |  |
| 30 | 1 DE | 2020-13 | 4 DE-South   | 3 | 4 | 1.893939 | ##### |  |
| 31 | 1 DE | 2020-13 | 4 DE-South   | 3 | 5 | #####    | ##### |  |
| 32 | 1 DE | 2020-13 | 4 DE-West    | 1 | 1 | 1.374378 | ##### |  |
| 33 | 1 DE | 2020-13 | 4 DE-West    | 1 | 2 | 1.010191 | ##### |  |
| 34 | 1 DE | 2020-13 | 4 DE-West    | 1 | 3 | 2.389723 | ##### |  |
| 35 | 1 DE | 2020-13 | 4 DE-West    | 1 | 4 | 1.93812  | ##### |  |
| 36 | 1 DE | 2020-13 | 4 DE-West    | 1 | 5 | #####    | ##### |  |
| 37 | 1 DE | 2020-13 | 4 DE-West    | 2 | 1 | 1.072232 | ##### |  |
| 38 | 1 DE | 2020-13 | 4 DE-West    | 2 | 2 | 1.196429 | ##### |  |
| 39 | 1 DE | 2020-13 | 4 DE-West    | 2 | 3 | 1.675    | ##### |  |
| 40 | 1 DE | 2020-13 | 4 DE-West    | 2 | 4 | 1.786667 | ##### |  |
| 41 | 1 DE | 2020-13 | 4 DE-West    | 2 | 5 | #####    | ##### |  |
| 42 | 1 DE | 2020-13 | 4 DE-West    | 3 | 1 | 1.703061 | ##### |  |
| 43 | 1 DE | 2020-13 | 4 DE-West    | 3 | 2 | 0.88     | ##### |  |
| 44 | 1 DE | 2020-13 | 4 DE-West    | 3 | 3 | 3.189655 | ##### |  |
| 45 | 1 DE | 2020-13 | 4 DE-West    | 3 | 4 | 2.053333 | ##### |  |
| 46 | 1 DE | 2020-13 | 4 DE-West    | 3 | 5 | #####    | ##### |  |
| 47 | 1 DE | 2020-13 | 5 DE-East    | 1 | 1 | 2.022421 | ##### |  |
| 48 | 1 DE | 2020-13 | 5 DE-East    | 1 | 2 | 1.461644 | ##### |  |
| 49 | 1 DE | 2020-13 | 5 DE-East    | 1 | 3 | 2.034898 | ##### |  |
| 50 | 1 DE | 2020-13 | 5 DE-East    | 1 | 4 | 2.632205 | ##### |  |
| 51 | 1 DE | 2020-13 | 5 DE-East    | 1 | 5 | 1.337495 | ##### |  |
| 52 | 1 DE | 2020-13 | 5 DE-East    | 2 | 1 | 1.628224 | ##### |  |
| 53 | 1 DE | 2020-13 | 5 DE-East    | 2 | 2 | 1.156863 | ##### |  |
| 54 | 1 DE | 2020-13 | 5 DE-East    | 2 | 3 | 1.692308 | ##### |  |
| 55 | 1 DE | 2020-13 | 5 DE-East    | 2 | 4 | 2.157407 | ##### |  |
| 56 | 1 DE | 2020-13 | 5 DE-East    | 2 | 5 | 1.130435 | ##### |  |
| 57 | 1 DE | 2020-13 | 5 DE-East    | 3 | 1 | 2.47711  | ##### |  |
| 58 | 1 DE | 2020-13 | 5 DE-East    | 3 | 2 | 1.75     | ##### |  |
| 59 | 1 DE | 2020-13 | 5 DE-East    | 3 | 2 | 1.75     | ##### |  |
| 60 | 1 DE | 2020-13 | 5 DE-East    | 3 | 2 | 1.75     | ##### |  |

|    |      |         |              |   |   |          |       |  |
|----|------|---------|--------------|---|---|----------|-------|--|
| 1  |      |         |              |   |   |          |       |  |
| 2  |      |         |              |   |   |          |       |  |
| 3  | 1 DE | 2020-13 | 5 DE-East    | 3 | 3 | 2.267606 | ##### |  |
| 4  | 1 DE | 2020-13 | 5 DE-East    | 3 | 4 | 3.160494 | ##### |  |
| 5  | 1 DE | 2020-13 | 5 DE-East    | 3 | 5 | 1.785714 | ##### |  |
| 6  | 1 DE | 2020-13 | 5 DE-North   | 1 | 1 | 1.846786 | ##### |  |
| 7  | 1 DE | 2020-13 | 5 DE-North   | 1 | 2 | 1.496007 | ##### |  |
| 8  | 1 DE | 2020-13 | 5 DE-North   | 1 | 3 | 1.504649 | ##### |  |
| 9  | 1 DE | 2020-13 | 5 DE-North   | 1 | 4 | 1.678059 | ##### |  |
| 10 | 1 DE | 2020-13 | 5 DE-North   | 1 | 5 | 2.392192 | ##### |  |
| 11 | 1 DE | 2020-13 | 5 DE-North   | 2 | 1 | 1.90755  | ##### |  |
| 12 | 1 DE | 2020-13 | 5 DE-North   | 2 | 2 | 2.075758 | ##### |  |
| 13 | 1 DE | 2020-13 | 5 DE-North   | 2 | 3 | 1.172043 | ##### |  |
| 14 | 1 DE | 2020-13 | 5 DE-North   | 2 | 4 | 1.907407 | ##### |  |
| 15 | 1 DE | 2020-13 | 5 DE-North   | 2 | 5 | 2.285714 | ##### |  |
| 16 | 1 DE | 2020-13 | 5 DE-North   | 3 | 1 | 1.776649 | ##### |  |
| 17 | 1 DE | 2020-13 | 5 DE-North   | 3 | 2 | #####    | ##### |  |
| 18 | 1 DE | 2020-13 | 5 DE-North   | 3 | 3 | 1.869565 | ##### |  |
| 19 | 1 DE | 2020-13 | 5 DE-North   | 3 | 4 | 1.468354 | ##### |  |
| 20 | 1 DE | 2020-13 | 5 DE-North   | 3 | 5 | 2.567568 | ##### |  |
| 21 | 1 DE | 2020-13 | 5 DE-Overall | 1 | 1 | 1.616214 | ##### |  |
| 22 | 1 DE | 2020-13 | 5 DE-Overall | 1 | 2 | 1.17965  | ##### |  |
| 23 | 1 DE | 2020-13 | 5 DE-Overall | 1 | 3 | 1.664178 | ##### |  |
| 24 | 1 DE | 2020-13 | 5 DE-Overall | 1 | 4 | 1.79863  | ##### |  |
| 25 | 1 DE | 2020-13 | 5 DE-Overall | 1 | 5 | 1.547633 | ##### |  |
| 26 | 1 DE | 2020-13 | 5 DE-Overall | 2 | 1 | 1.499366 | ##### |  |
| 27 | 1 DE | 2020-13 | 5 DE-Overall | 2 | 2 | 1.292501 | ##### |  |
| 28 | 1 DE | 2020-13 | 5 DE-Overall | 2 | 3 | 1.693176 | ##### |  |
| 29 | 1 DE | 2020-13 | 5 DE-Overall | 2 | 4 | 1.657847 | ##### |  |
| 30 | 1 DE | 2020-13 | 5 DE-Overall | 2 | 5 | 1.296382 | ##### |  |
| 31 | 1 DE | 2020-13 | 5 DE-Overall | 3 | 1 | 1.740429 | ##### |  |
| 32 | 1 DE | 2020-13 | 5 DE-Overall | 3 | 2 | 1.087015 | ##### |  |
| 33 | 1 DE | 2020-13 | 5 DE-Overall | 3 | 3 | 1.637566 | ##### |  |
| 34 | 1 DE | 2020-13 | 5 DE-Overall | 3 | 4 | 1.932779 | ##### |  |
| 35 | 1 DE | 2020-13 | 5 DE-Overall | 3 | 5 | 1.924195 | ##### |  |
| 36 | 1 DE | 2020-13 | 5 DE-South   | 1 | 1 | 1.220343 | ##### |  |
| 37 | 1 DE | 2020-13 | 5 DE-South   | 1 | 2 | #####    | ##### |  |
| 38 | 1 DE | 2020-13 | 5 DE-South   | 1 | 3 | 1.298898 | ##### |  |
| 39 | 1 DE | 2020-13 | 5 DE-South   | 1 | 4 | 1.281557 | ##### |  |
| 40 | 1 DE | 2020-13 | 5 DE-South   | 1 | 5 | 1.239999 | ##### |  |
| 41 | 1 DE | 2020-13 | 5 DE-South   | 2 | 1 | 1.286618 | ##### |  |
| 42 | 1 DE | 2020-13 | 5 DE-South   | 2 | 2 | #####    | ##### |  |
| 43 | 1 DE | 2020-13 | 5 DE-South   | 2 | 3 | 1.805195 | ##### |  |
| 44 | 1 DE | 2020-13 | 5 DE-South   | 2 | 4 | 1.188889 | ##### |  |
| 45 | 1 DE | 2020-13 | 5 DE-South   | 2 | 5 | 1.181818 | ##### |  |
| 46 | 1 DE | 2020-13 | 5 DE-South   | 3 | 1 | 1.159512 | ##### |  |
| 47 | 1 DE | 2020-13 | 5 DE-South   | 3 | 2 | #####    | ##### |  |
| 48 | 1 DE | 2020-13 | 5 DE-South   | 3 | 3 | #####    | ##### |  |
| 49 | 1 DE | 2020-13 | 5 DE-South   | 3 | 4 | 1.382353 | ##### |  |
| 50 | 1 DE | 2020-13 | 5 DE-South   | 3 | 5 | 1.291667 | ##### |  |
| 51 | 1 DE | 2020-13 | 5 DE-West    | 1 | 1 | 1.584906 | ##### |  |
| 52 | 1 DE | 2020-13 | 5 DE-West    | 1 | 2 | 1.149648 | ##### |  |
| 53 | 1 DE | 2020-13 | 5 DE-West    | 1 | 3 | 1.802372 | ##### |  |
| 54 | 1 DE | 2020-13 | 5 DE-West    | 1 | 4 | 1.766595 | ##### |  |
| 55 | 1 DE | 2020-13 | 5 DE-West    | 1 | 5 | 1.419984 | ##### |  |
| 56 | 1 DE | 2020-13 | 5 DE-West    | 2 | 1 | 1.359683 | ##### |  |
| 57 | 1 DE | 2020-13 | 5 DE-West    | 2 | 2 | 1.135593 | ##### |  |
| 58 | 1 DE | 2020-13 | 5 DE-West    | 2 | 3 | 1.879032 | ##### |  |
| 59 | 1 DE | 2020-13 | 5 DE-West    | 2 |   |          |       |  |
| 60 | 1 DE | 2020-13 | 5 DE-West    | 2 |   |          |       |  |

|    |      |         |              |   |   |          |          |  |
|----|------|---------|--------------|---|---|----------|----------|--|
| 1  |      |         |              |   |   |          |          |  |
| 2  |      |         |              |   |   |          |          |  |
| 3  | 1 DE | 2020-13 | 5 DE-West    | 2 | 4 | 1.615385 | #####    |  |
| 4  | 1 DE | 2020-13 | 5 DE-West    | 2 | 5 | #####    | #####    |  |
| 5  | 1 DE | 2020-13 | 5 DE-West    | 3 | 1 | 1.831363 | #####    |  |
| 6  | 1 DE | 2020-13 | 5 DE-West    | 3 | 2 | 1.16     | #####    |  |
| 7  | 1 DE | 2020-13 | 5 DE-West    | 3 | 3 | 1.716667 | #####    |  |
| 8  | 1 DE | 2020-13 | 5 DE-West    | 3 | 4 | 1.883117 | #####    |  |
| 9  | 1 DE | 2020-13 | 5 DE-West    | 3 | 5 | 2.333333 | #####    |  |
| 10 | 1 DE | 2020-14 | 1 DE-East    | 1 | 1 | 5.521922 | #####    |  |
| 11 | 1 DE | 2020-14 | 1 DE-East    | 1 | 2 | 6.372449 | #####    |  |
| 12 | 1 DE | 2020-14 | 1 DE-East    | 1 | 3 | 6.898416 | #####    |  |
| 13 | 1 DE | 2020-14 | 1 DE-East    | 1 | 4 | 5.852929 | #####    |  |
| 14 | 1 DE | 2020-14 | 1 DE-East    | 1 | 5 | 2.99114  | #####    |  |
| 15 | 1 DE | 2020-14 | 1 DE-East    | 2 | 1 | 4.921647 | #####    |  |
| 16 | 1 DE | 2020-14 | 1 DE-East    | 2 | 2 | 5.55102  | #####    |  |
| 17 | 1 DE | 2020-14 | 1 DE-East    | 2 | 3 | 6.634831 | #####    |  |
| 18 | 1 DE | 2020-14 | 1 DE-East    | 2 | 4 | 5.234694 | #####    |  |
| 19 | 1 DE | 2020-14 | 1 DE-East    | 2 | 5 | 2.44     | #####    |  |
| 20 | 1 DE | 2020-14 | 1 DE-East    | 3 | 1 | 6.354626 | #####    |  |
| 21 | 1 DE | 2020-14 | 1 DE-East    | 3 | 2 | 7.021739 | 1.04918  |  |
| 22 | 1 DE | 2020-14 | 1 DE-East    | 3 | 3 | 7.318841 | 1.000057 |  |
| 23 | 1 DE | 2020-14 | 1 DE-East    | 3 | 4 | 6.630769 | 1.153928 |  |
| 24 | 1 DE | 2020-14 | 1 DE-East    | 3 | 5 | 4.028571 | #####    |  |
| 25 | 1 DE | 2020-14 | 1 DE-North   | 1 | 1 | 6.002082 | #####    |  |
| 26 | 1 DE | 2020-14 | 1 DE-North   | 1 | 2 | 6.349535 | #####    |  |
| 27 | 1 DE | 2020-14 | 1 DE-North   | 1 | 3 | 7.114534 | #####    |  |
| 28 | 1 DE | 2020-14 | 1 DE-North   | 1 | 4 | 6.296595 | #####    |  |
| 29 | 1 DE | 2020-14 | 1 DE-North   | 1 | 5 | 4.178385 | #####    |  |
| 30 | 1 DE | 2020-14 | 1 DE-North   | 2 | 1 | 4.924882 | #####    |  |
| 31 | 1 DE | 2020-14 | 1 DE-North   | 2 | 2 | 5.567797 | #####    |  |
| 32 | 1 DE | 2020-14 | 1 DE-North   | 2 | 3 | 5.910828 | #####    |  |
| 33 | 1 DE | 2020-14 | 1 DE-North   | 2 | 4 | 4.571429 | #####    |  |
| 34 | 1 DE | 2020-14 | 1 DE-North   | 2 | 5 | 3.727273 | #####    |  |
| 35 | 1 DE | 2020-14 | 1 DE-North   | 3 | 1 | 7.156371 | #####    |  |
| 36 | 1 DE | 2020-14 | 1 DE-North   | 3 | 2 | 7.105263 | 1.40535  |  |
| 37 | 1 DE | 2020-14 | 1 DE-North   | 3 | 3 | 8.692308 | 1.095492 |  |
| 38 | 1 DE | 2020-14 | 1 DE-North   | 3 | 4 | 7.628866 | #####    |  |
| 39 | 1 DE | 2020-14 | 1 DE-North   | 3 | 5 | 4.780488 | 1.134415 |  |
| 40 | 1 DE | 2020-14 | 1 DE-North   | 3 | 5 | 4.780488 | 1.134415 |  |
| 41 | 1 DE | 2020-14 | 1 DE-Overall | 1 | 1 | 5.330553 | #####    |  |
| 42 | 1 DE | 2020-14 | 1 DE-Overall | 1 | 2 | 6.027586 | #####    |  |
| 43 | 1 DE | 2020-14 | 1 DE-Overall | 1 | 3 | 6.474935 | #####    |  |
| 44 | 1 DE | 2020-14 | 1 DE-Overall | 1 | 4 | 5.5717   | #####    |  |
| 45 | 1 DE | 2020-14 | 1 DE-Overall | 1 | 5 | 3.111317 | #####    |  |
| 46 | 1 DE | 2020-14 | 1 DE-Overall | 2 | 1 | 4.773346 | #####    |  |
| 47 | 1 DE | 2020-14 | 1 DE-Overall | 2 | 2 | 5.458394 | #####    |  |
| 48 | 1 DE | 2020-14 | 1 DE-Overall | 2 | 3 | 6.031373 | #####    |  |
| 49 | 1 DE | 2020-14 | 1 DE-Overall | 2 | 4 | 5.006466 | #####    |  |
| 50 | 1 DE | 2020-14 | 1 DE-Overall | 2 | 5 | 2.718981 | #####    |  |
| 51 | 1 DE | 2020-14 | 1 DE-Overall | 3 | 1 | 6.052509 | #####    |  |
| 52 | 1 DE | 2020-14 | 1 DE-Overall | 3 | 2 | 6.586464 | #####    |  |
| 53 | 1 DE | 2020-14 | 1 DE-Overall | 3 | 3 | 7.076492 | #####    |  |
| 54 | 1 DE | 2020-14 | 1 DE-Overall | 3 | 4 | 6.227155 | #####    |  |
| 55 | 1 DE | 2020-14 | 1 DE-Overall | 3 | 5 | 3.784142 | #####    |  |
| 56 | 1 DE | 2020-14 | 1 DE-South   | 1 | 1 | 4.818372 | #####    |  |
| 57 | 1 DE | 2020-14 | 1 DE-South   | 1 | 2 | 5.759116 | #####    |  |
| 58 | 1 DE | 2020-14 | 1 DE-South   | 1 | 3 | 5.828219 | #####    |  |
| 59 | 1 DE | 2020-14 | 1 DE-South   | 1 | 4 | 4.677122 | #####    |  |
| 60 | 1 DE | 2020-14 | 1 DE-South   | 1 | 4 | 4.677122 | #####    |  |

|    |      |         |            |   |   |          |       |  |
|----|------|---------|------------|---|---|----------|-------|--|
| 1  |      |         |            |   |   |          |       |  |
| 2  |      |         |            |   |   |          |       |  |
| 3  | 1 DE | 2020-14 | 1 DE-South | 1 | 5 | 2.568575 | ##### |  |
| 4  | 1 DE | 2020-14 | 1 DE-South | 2 | 1 | 4.387717 | ##### |  |
| 5  | 1 DE | 2020-14 | 1 DE-South | 2 | 2 | 5.309942 | ##### |  |
| 6  | 1 DE | 2020-14 | 1 DE-South | 2 | 3 | 5.211765 | ##### |  |
| 7  | 1 DE | 2020-14 | 1 DE-South | 2 | 4 | 4.875    | ##### |  |
| 8  | 1 DE | 2020-14 | 1 DE-South | 2 | 5 | 2.27907  | ##### |  |
| 9  | 1 DE | 2020-14 | 1 DE-South | 3 | 1 | 5.430111 | ##### |  |
| 10 | 1 DE | 2020-14 | 1 DE-South | 3 | 2 | 6.354167 | ##### |  |
| 11 | 1 DE | 2020-14 | 1 DE-South | 3 | 3 | 6.586207 | ##### |  |
| 12 | 1 DE | 2020-14 | 1 DE-South | 3 | 4 | 4.410256 | ##### |  |
| 13 | 1 DE | 2020-14 | 1 DE-South | 3 | 5 | 3.142857 | ##### |  |
| 14 | 1 DE | 2020-14 | 1 DE-West  | 1 | 1 | 5.248425 | ##### |  |
| 15 | 1 DE | 2020-14 | 1 DE-West  | 1 | 2 | 5.936778 | ##### |  |
| 16 | 1 DE | 2020-14 | 1 DE-West  | 1 | 3 | 6.466526 | ##### |  |
| 17 | 1 DE | 2020-14 | 1 DE-West  | 1 | 4 | 5.502725 | ##### |  |
| 18 | 1 DE | 2020-14 | 1 DE-West  | 1 | 5 | 2.976906 | ##### |  |
| 19 | 1 DE | 2020-14 | 1 DE-West  | 2 | 1 | 4.929594 | ##### |  |
| 20 | 1 DE | 2020-14 | 1 DE-West  | 2 | 2 | 5.535354 | ##### |  |
| 21 | 1 DE | 2020-14 | 1 DE-West  | 2 | 3 | 6.414141 | ##### |  |
| 22 | 1 DE | 2020-14 | 1 DE-West  | 2 | 4 | 5.156863 | ##### |  |
| 23 | 1 DE | 2020-14 | 1 DE-West  | 2 | 5 | 2.714286 | ##### |  |
| 24 | 1 DE | 2020-14 | 1 DE-West  | 3 | 1 | 5.66027  | ##### |  |
| 25 | 1 DE | 2020-14 | 1 DE-West  | 3 | 2 | 6.263158 | ##### |  |
| 26 | 1 DE | 2020-14 | 1 DE-West  | 3 | 3 | 6.538462 | ##### |  |
| 27 | 1 DE | 2020-14 | 1 DE-West  | 3 | 4 | 5.95     | ##### |  |
| 28 | 1 DE | 2020-14 | 1 DE-West  | 3 | 5 | 3.421053 | ##### |  |
| 29 | 1 DE | 2020-14 | 2 DE-East  | 1 | 1 | 1.662579 | ##### |  |
| 30 | 1 DE | 2020-14 | 2 DE-East  | 1 | 2 | 1.968263 | ##### |  |
| 31 | 1 DE | 2020-14 | 2 DE-East  | 1 | 3 | 1.997735 | ##### |  |
| 32 | 1 DE | 2020-14 | 2 DE-East  | 1 | 4 | 1.498736 | ##### |  |
| 33 | 1 DE | 2020-14 | 2 DE-East  | 1 | 5 | 1.202541 | ##### |  |
| 34 | 1 DE | 2020-14 | 2 DE-East  | 2 | 1 | 1.563417 | ##### |  |
| 35 | 1 DE | 2020-14 | 2 DE-East  | 2 | 2 | 1.8      | ##### |  |
| 36 | 1 DE | 2020-14 | 2 DE-East  | 2 | 3 | 2.157068 | ##### |  |
| 37 | 1 DE | 2020-14 | 2 DE-East  | 2 | 4 | 1.25     | ##### |  |
| 38 | 1 DE | 2020-14 | 2 DE-East  | 2 | 5 | 1.04     | ##### |  |
| 39 | 1 DE | 2020-14 | 2 DE-East  | 3 | 1 | 1.795252 | ##### |  |
| 40 | 1 DE | 2020-14 | 2 DE-East  | 3 | 2 | 2.102041 | ##### |  |
| 41 | 1 DE | 2020-14 | 2 DE-East  | 3 | 3 | 1.765432 | ##### |  |
| 42 | 1 DE | 2020-14 | 2 DE-East  | 3 | 4 | 1.811594 | ##### |  |
| 43 | 1 DE | 2020-14 | 2 DE-East  | 3 | 5 | 1.5      | ##### |  |
| 44 | 1 DE | 2020-14 | 2 DE-North | 1 | 1 | 1.663608 | ##### |  |
| 45 | 1 DE | 2020-14 | 2 DE-North | 1 | 2 | 1.769266 | ##### |  |
| 46 | 1 DE | 2020-14 | 2 DE-North | 1 | 3 | 1.864053 | ##### |  |
| 47 | 1 DE | 2020-14 | 2 DE-North | 1 | 4 | 1.651931 | ##### |  |
| 48 | 1 DE | 2020-14 | 2 DE-North | 1 | 5 | 1.352737 | ##### |  |
| 49 | 1 DE | 2020-14 | 2 DE-North | 2 | 1 | 1.74439  | ##### |  |
| 50 | 1 DE | 2020-14 | 2 DE-North | 2 | 2 | 1.88     | ##### |  |
| 51 | 1 DE | 2020-14 | 2 DE-North | 2 | 3 | 1.964497 | ##### |  |
| 52 | 1 DE | 2020-14 | 2 DE-North | 2 | 4 | 1.65     | ##### |  |
| 53 | 1 DE | 2020-14 | 2 DE-North | 2 | 5 | 1.477273 | ##### |  |
| 54 | 1 DE | 2020-14 | 2 DE-North | 3 | 1 | 1.578331 | ##### |  |
| 55 | 1 DE | 2020-14 | 2 DE-North | 3 | 2 | 1.666667 | ##### |  |
| 56 | 1 DE | 2020-14 | 2 DE-North | 3 | 3 | 1.736111 | ##### |  |
| 57 | 1 DE | 2020-14 | 2 DE-North | 3 | 4 | 1.653465 | ##### |  |
| 58 | 1 DE | 2020-14 | 2 DE-North | 3 | 5 | 1.190476 | ##### |  |
| 59 | 1 DE | 2020-14 | 2 DE-North | 3 |   |          |       |  |
| 60 | 1 DE | 2020-14 | 2 DE-North | 3 |   |          |       |  |



|    |      |         |              |   |   |          |       |  |
|----|------|---------|--------------|---|---|----------|-------|--|
| 1  |      |         |              |   |   |          |       |  |
| 2  |      |         |              |   |   |          |       |  |
| 3  | 1 DE | 2020-14 | 2 DE-Overall | 1 | 1 | 1.74589  | ##### |  |
| 4  | 1 DE | 2020-14 | 2 DE-Overall | 1 | 2 | 2.179335 | ##### |  |
| 5  | 1 DE | 2020-14 | 2 DE-Overall | 1 | 3 | 1.902492 | ##### |  |
| 6  | 1 DE | 2020-14 | 2 DE-Overall | 1 | 4 | 1.633783 | ##### |  |
| 7  | 1 DE | 2020-14 | 2 DE-Overall | 1 | 5 | 1.301698 | ##### |  |
| 8  | 1 DE | 2020-14 | 2 DE-Overall | 2 | 1 | 1.741644 | ##### |  |
| 9  | 1 DE | 2020-14 | 2 DE-Overall | 2 | 2 | 2.078988 | ##### |  |
| 10 | 1 DE | 2020-14 | 2 DE-Overall | 2 | 3 | 2.072424 | ##### |  |
| 11 | 1 DE | 2020-14 | 2 DE-Overall | 2 | 4 | 1.593439 | ##### |  |
| 12 | 1 DE | 2020-14 | 2 DE-Overall | 2 | 5 | 1.250364 | ##### |  |
| 13 | 1 DE | 2020-14 | 2 DE-Overall | 3 | 1 | 1.751322 | ##### |  |
| 14 | 1 DE | 2020-14 | 2 DE-Overall | 3 | 2 | 2.275879 | ##### |  |
| 15 | 1 DE | 2020-14 | 2 DE-Overall | 3 | 3 | 1.67031  | ##### |  |
| 16 | 1 DE | 2020-14 | 2 DE-Overall | 3 | 4 | 1.680314 | ##### |  |
| 17 | 1 DE | 2020-14 | 2 DE-Overall | 3 | 5 | 1.387291 | ##### |  |
| 18 | 1 DE | 2020-14 | 2 DE-South   | 1 | 1 | 1.861028 | ##### |  |
| 19 | 1 DE | 2020-14 | 2 DE-South   | 1 | 2 | 2.473694 | ##### |  |
| 20 | 1 DE | 2020-14 | 2 DE-South   | 1 | 3 | 1.876276 | ##### |  |
| 21 | 1 DE | 2020-14 | 2 DE-South   | 1 | 4 | 1.656309 | ##### |  |
| 22 | 1 DE | 2020-14 | 2 DE-South   | 1 | 5 | 1.405126 | ##### |  |
| 23 | 1 DE | 2020-14 | 2 DE-South   | 2 | 1 | 1.850484 | ##### |  |
| 24 | 1 DE | 2020-14 | 2 DE-South   | 2 | 2 | 2.293785 | ##### |  |
| 25 | 1 DE | 2020-14 | 2 DE-South   | 2 | 3 | 2.048913 | ##### |  |
| 26 | 1 DE | 2020-14 | 2 DE-South   | 2 | 4 | 1.591549 | ##### |  |
| 27 | 1 DE | 2020-14 | 2 DE-South   | 2 | 5 | 1.418605 | ##### |  |
| 28 | 1 DE | 2020-14 | 2 DE-South   | 3 | 1 | 1.876061 | ##### |  |
| 29 | 1 DE | 2020-14 | 2 DE-South   | 3 | 2 | 2.705882 | ##### |  |
| 30 | 1 DE | 2020-14 | 2 DE-South   | 3 | 3 | 1.651685 | ##### |  |
| 31 | 1 DE | 2020-14 | 2 DE-South   | 3 | 4 | 1.744186 | ##### |  |
| 32 | 1 DE | 2020-14 | 2 DE-South   | 3 | 5 | 1.37931  | ##### |  |
| 33 | 1 DE | 2020-14 | 2 DE-South   | 3 | 5 | 1.37931  | ##### |  |
| 34 | 1 DE | 2020-14 | 2 DE-West    | 1 | 1 | 1.748927 | ##### |  |
| 35 | 1 DE | 2020-14 | 2 DE-West    | 1 | 2 | 2.236184 | ##### |  |
| 36 | 1 DE | 2020-14 | 2 DE-West    | 1 | 3 | 1.888775 | ##### |  |
| 37 | 1 DE | 2020-14 | 2 DE-West    | 1 | 4 | 1.689244 | ##### |  |
| 38 | 1 DE | 2020-14 | 2 DE-West    | 1 | 5 | 1.252099 | ##### |  |
| 39 | 1 DE | 2020-14 | 2 DE-West    | 2 | 1 | 1.754085 | ##### |  |
| 40 | 1 DE | 2020-14 | 2 DE-West    | 2 | 2 | 2.075472 | ##### |  |
| 41 | 1 DE | 2020-14 | 2 DE-West    | 2 | 3 | 2.095023 | ##### |  |
| 42 | 1 DE | 2020-14 | 2 DE-West    | 2 | 4 | 1.773585 | ##### |  |
| 43 | 1 DE | 2020-14 | 2 DE-West    | 2 | 5 | 1.125    | ##### |  |
| 44 | 1 DE | 2020-14 | 2 DE-West    | 3 | 1 | 1.742336 | ##### |  |
| 45 | 1 DE | 2020-14 | 2 DE-West    | 3 | 2 | 2.365854 | ##### |  |
| 46 | 1 DE | 2020-14 | 2 DE-West    | 3 | 3 | 1.595238 | ##### |  |
| 47 | 1 DE | 2020-14 | 2 DE-West    | 3 | 4 | 1.584615 | ##### |  |
| 48 | 1 DE | 2020-14 | 2 DE-West    | 3 | 5 | 1.461538 | ##### |  |
| 49 | 1 DE | 2020-14 | 3 DE-East    | 1 | 1 | #####    | ##### |  |
| 50 | 1 DE | 2020-14 | 3 DE-East    | 1 | 2 | 0        | 0     |  |
| 51 | 1 DE | 2020-14 | 3 DE-East    | 1 | 3 | #####    | ##### |  |
| 52 | 1 DE | 2020-14 | 3 DE-East    | 1 | 4 | #####    | ##### |  |
| 53 | 1 DE | 2020-14 | 3 DE-East    | 1 | 5 | #####    | ##### |  |
| 54 | 1 DE | 2020-14 | 3 DE-East    | 2 | 1 | #####    | ##### |  |
| 55 | 1 DE | 2020-14 | 3 DE-East    | 2 | 2 | 0        | 0     |  |
| 56 | 1 DE | 2020-14 | 3 DE-East    | 2 | 3 | #####    | ##### |  |
| 57 | 1 DE | 2020-14 | 3 DE-East    | 2 | 4 | #####    | ##### |  |
| 58 | 1 DE | 2020-14 | 3 DE-East    | 2 | 5 | 0.02     | ##### |  |
| 59 | 1 DE | 2020-14 | 3 DE-East    | 3 | 1 | #####    | ##### |  |
| 60 | 1 DE | 2020-14 | 3 DE-East    | 3 | 1 | #####    | ##### |  |

1  
2  
3  
4  
5  
6  
7  
8  
9  
10  
11  
12  
13  
14  
15  
16  
17  
18  
19  
20  
21  
22  
23  
24  
25  
26  
27  
28  
29  
30  
31  
32  
33  
34  
35  
36  
37  
38  
39  
40  
41  
42  
43  
44  
45  
46  
47  
48  
49  
50  
51  
52  
53  
54  
55  
56  
57  
58  
59  
60

|      |         |              |   |   |       |       |
|------|---------|--------------|---|---|-------|-------|
| 1 DE | 2020-14 | 3 DE-East    | 3 | 2 | 0     | 0     |
| 1 DE | 2020-14 | 3 DE-East    | 3 | 3 | 0     | 0     |
| 1 DE | 2020-14 | 3 DE-East    | 3 | 4 | ##### | ##### |
| 1 DE | 2020-14 | 3 DE-East    | 3 | 5 | ##### | ##### |
| 1 DE | 2020-14 | 3 DE-North   | 1 | 1 | ##### | ##### |
| 1 DE | 2020-14 | 3 DE-North   | 1 | 2 | ##### | ##### |
| 1 DE | 2020-14 | 3 DE-North   | 1 | 3 | ##### | ##### |
| 1 DE | 2020-14 | 3 DE-North   | 1 | 4 | ##### | ##### |
| 1 DE | 2020-14 | 3 DE-North   | 1 | 5 | 0     | 0     |
| 1 DE | 2020-14 | 3 DE-North   | 2 | 1 | ##### | ##### |
| 1 DE | 2020-14 | 3 DE-North   | 2 | 2 | 0.008 | ##### |
| 1 DE | 2020-14 | 3 DE-North   | 2 | 3 | ##### | ##### |
| 1 DE | 2020-14 | 3 DE-North   | 2 | 4 | 0     | 0     |
| 1 DE | 2020-14 | 3 DE-North   | 2 | 5 | 0     | 0     |
| 1 DE | 2020-14 | 3 DE-North   | 3 | 1 | ##### | ##### |
| 1 DE | 2020-14 | 3 DE-North   | 3 | 2 | 0     | 0     |
| 1 DE | 2020-14 | 3 DE-North   | 3 | 3 | 0     | 0     |
| 1 DE | 2020-14 | 3 DE-North   | 3 | 4 | ##### | ##### |
| 1 DE | 2020-14 | 3 DE-North   | 3 | 5 | 0     | 0     |
| 1 DE | 2020-14 | 3 DE-Overall | 1 | 1 | ##### | ##### |
| 1 DE | 2020-14 | 3 DE-Overall | 1 | 2 | ##### | ##### |
| 1 DE | 2020-14 | 3 DE-Overall | 1 | 3 | ##### | ##### |
| 1 DE | 2020-14 | 3 DE-Overall | 1 | 4 | ##### | ##### |
| 1 DE | 2020-14 | 3 DE-Overall | 1 | 5 | ##### | ##### |
| 1 DE | 2020-14 | 3 DE-Overall | 2 | 1 | ##### | ##### |
| 1 DE | 2020-14 | 3 DE-Overall | 2 | 2 | ##### | ##### |
| 1 DE | 2020-14 | 3 DE-Overall | 2 | 3 | ##### | ##### |
| 1 DE | 2020-14 | 3 DE-Overall | 2 | 4 | ##### | ##### |
| 1 DE | 2020-14 | 3 DE-Overall | 2 | 5 | ##### | ##### |
| 1 DE | 2020-14 | 3 DE-Overall | 3 | 1 | ##### | ##### |
| 1 DE | 2020-14 | 3 DE-Overall | 3 | 2 | ##### | ##### |
| 1 DE | 2020-14 | 3 DE-Overall | 3 | 3 | 0     | 0     |
| 1 DE | 2020-14 | 3 DE-Overall | 3 | 4 | ##### | ##### |
| 1 DE | 2020-14 | 3 DE-Overall | 3 | 5 | ##### | ##### |
| 1 DE | 2020-14 | 3 DE-South   | 1 | 1 | ##### | ##### |
| 1 DE | 2020-14 | 3 DE-South   | 1 | 2 | ##### | ##### |
| 1 DE | 2020-14 | 3 DE-South   | 1 | 3 | 0     | 0     |
| 1 DE | 2020-14 | 3 DE-South   | 1 | 4 | ##### | ##### |
| 1 DE | 2020-14 | 3 DE-South   | 1 | 5 | 0     | 0     |
| 1 DE | 2020-14 | 3 DE-South   | 2 | 1 | ##### | ##### |
| 1 DE | 2020-14 | 3 DE-South   | 2 | 2 | ##### | ##### |
| 1 DE | 2020-14 | 3 DE-South   | 2 | 3 | 0     | 0     |
| 1 DE | 2020-14 | 3 DE-South   | 2 | 4 | ##### | ##### |
| 1 DE | 2020-14 | 3 DE-South   | 2 | 5 | 0     | 0     |
| 1 DE | 2020-14 | 3 DE-South   | 3 | 1 | ##### | ##### |
| 1 DE | 2020-14 | 3 DE-South   | 3 | 2 | ##### | ##### |
| 1 DE | 2020-14 | 3 DE-South   | 3 | 3 | 0     | 0     |
| 1 DE | 2020-14 | 3 DE-South   | 3 | 4 | 0     | 0     |
| 1 DE | 2020-14 | 3 DE-South   | 3 | 5 | 0     | 0     |
| 1 DE | 2020-14 | 3 DE-West    | 1 | 1 | ##### | ##### |
| 1 DE | 2020-14 | 3 DE-West    | 1 | 2 | ##### | ##### |
| 1 DE | 2020-14 | 3 DE-West    | 1 | 3 | 0     | 0     |
| 1 DE | 2020-14 | 3 DE-West    | 1 | 4 | ##### | ##### |
| 1 DE | 2020-14 | 3 DE-West    | 1 | 5 | ##### | ##### |
| 1 DE | 2020-14 | 3 DE-West    | 2 | 1 | ##### | ##### |
| 1 DE | 2020-14 | 3 DE-West    | 2 | 2 | 0     | 0     |

|    |      |         |              |   |   |          |          |  |
|----|------|---------|--------------|---|---|----------|----------|--|
| 1  |      |         |              |   |   |          |          |  |
| 2  |      |         |              |   |   |          |          |  |
| 3  | 1 DE | 2020-14 | 3 DE-West    | 2 | 3 | 0        | 0        |  |
| 4  | 1 DE | 2020-14 | 3 DE-West    | 2 | 4 | 0        | 0        |  |
| 5  | 1 DE | 2020-14 | 3 DE-West    | 2 | 5 | #####    | #####    |  |
| 6  | 1 DE | 2020-14 | 3 DE-West    | 3 | 1 | #####    | #####    |  |
| 7  | 1 DE | 2020-14 | 3 DE-West    | 3 | 2 | #####    | #####    |  |
| 8  | 1 DE | 2020-14 | 3 DE-West    | 3 | 3 | 0        | 0        |  |
| 9  | 1 DE | 2020-14 | 3 DE-West    | 3 | 4 | #####    | #####    |  |
| 10 | 1 DE | 2020-14 | 3 DE-West    | 3 | 5 | #####    | #####    |  |
| 11 | 1 DE | 2020-14 | 4 DE-East    | 1 | 1 | 2.054278 | #####    |  |
| 12 | 1 DE | 2020-14 | 4 DE-East    | 1 | 2 | 2.5708   | #####    |  |
| 13 | 1 DE | 2020-14 | 4 DE-East    | 1 | 3 | 3.090119 | #####    |  |
| 14 | 1 DE | 2020-14 | 4 DE-East    | 1 | 4 | 2.419761 | #####    |  |
| 15 | 1 DE | 2020-14 | 4 DE-East    | 1 | 5 | #####    | #####    |  |
| 16 | 1 DE | 2020-14 | 4 DE-East    | 2 | 1 | 1.712114 | #####    |  |
| 17 | 1 DE | 2020-14 | 4 DE-East    | 2 | 2 | 2.257426 | #####    |  |
| 18 | 1 DE | 2020-14 | 4 DE-East    | 2 | 3 | 2.629834 | #####    |  |
| 19 | 1 DE | 2020-14 | 4 DE-East    | 2 | 4 | 2.117647 | #####    |  |
| 20 | 1 DE | 2020-14 | 4 DE-East    | 2 | 5 | 0.04     | #####    |  |
| 21 | 1 DE | 2020-14 | 4 DE-East    | 3 | 1 | 2.53249  | #####    |  |
| 22 | 1 DE | 2020-14 | 4 DE-East    | 3 | 2 | 2.826087 | #####    |  |
| 23 | 1 DE | 2020-14 | 4 DE-East    | 3 | 3 | 3.805556 | #####    |  |
| 24 | 1 DE | 2020-14 | 4 DE-East    | 3 | 4 | 2.815385 | #####    |  |
| 25 | 1 DE | 2020-14 | 4 DE-East    | 3 | 5 | #####    | #####    |  |
| 26 | 1 DE | 2020-14 | 4 DE-East    | 3 | 5 | #####    | #####    |  |
| 27 | 1 DE | 2020-14 | 4 DE-North   | 1 | 1 | 2.414201 | #####    |  |
| 28 | 1 DE | 2020-14 | 4 DE-North   | 1 | 2 | 3.011712 | #####    |  |
| 29 | 1 DE | 2020-14 | 4 DE-North   | 1 | 3 | 3.306446 | #####    |  |
| 30 | 1 DE | 2020-14 | 4 DE-North   | 1 | 4 | 2.438863 | #####    |  |
| 31 | 1 DE | 2020-14 | 4 DE-North   | 1 | 5 | #####    | #####    |  |
| 32 | 1 DE | 2020-14 | 4 DE-North   | 2 | 1 | 1.70566  | #####    |  |
| 33 | 1 DE | 2020-14 | 4 DE-North   | 2 | 2 | 2.016949 | #####    |  |
| 34 | 1 DE | 2020-14 | 4 DE-North   | 2 | 3 | 2.573248 | #####    |  |
| 35 | 1 DE | 2020-14 | 4 DE-North   | 2 | 4 | 1.631579 | #####    |  |
| 36 | 1 DE | 2020-14 | 4 DE-North   | 2 | 5 | #####    | #####    |  |
| 37 | 1 DE | 2020-14 | 4 DE-North   | 3 | 1 | 3.157965 | #####    |  |
| 38 | 1 DE | 2020-14 | 4 DE-North   | 3 | 2 | 3.948718 | 1.210343 |  |
| 39 | 1 DE | 2020-14 | 4 DE-North   | 3 | 3 | 4.238806 | #####    |  |
| 40 | 1 DE | 2020-14 | 4 DE-North   | 3 | 4 | 3.060606 | #####    |  |
| 41 | 1 DE | 2020-14 | 4 DE-North   | 3 | 5 | 1.380952 | #####    |  |
| 42 | 1 DE | 2020-14 | 4 DE-Overall | 1 | 1 | 1.968138 | #####    |  |
| 43 | 1 DE | 2020-14 | 4 DE-Overall | 1 | 2 | 2.522693 | #####    |  |
| 44 | 1 DE | 2020-14 | 4 DE-Overall | 1 | 3 | 2.925618 | #####    |  |
| 45 | 1 DE | 2020-14 | 4 DE-Overall | 1 | 4 | 2.027315 | #####    |  |
| 46 | 1 DE | 2020-14 | 4 DE-Overall | 1 | 5 | #####    | #####    |  |
| 47 | 1 DE | 2020-14 | 4 DE-Overall | 2 | 1 | 1.539295 | #####    |  |
| 48 | 1 DE | 2020-14 | 4 DE-Overall | 2 | 2 | 1.98235  | #####    |  |
| 49 | 1 DE | 2020-14 | 4 DE-Overall | 2 | 3 | 2.398548 | #####    |  |
| 50 | 1 DE | 2020-14 | 4 DE-Overall | 2 | 4 | 1.682718 | #####    |  |
| 51 | 1 DE | 2020-14 | 4 DE-Overall | 2 | 5 | #####    | #####    |  |
| 52 | 1 DE | 2020-14 | 4 DE-Overall | 3 | 1 | 2.520264 | #####    |  |
| 53 | 1 DE | 2020-14 | 4 DE-Overall | 3 | 2 | 3.049324 | #####    |  |
| 54 | 1 DE | 2020-14 | 4 DE-Overall | 3 | 3 | 3.636543 | #####    |  |
| 55 | 1 DE | 2020-14 | 4 DE-Overall | 3 | 4 | 2.425356 | #####    |  |
| 56 | 1 DE | 2020-14 | 4 DE-Overall | 3 | 5 | #####    | #####    |  |
| 57 | 1 DE | 2020-14 | 4 DE-Overall | 3 | 5 | #####    | #####    |  |
| 58 | 1 DE | 2020-14 | 4 DE-South   | 1 | 1 | 1.599014 | #####    |  |
| 59 | 1 DE | 2020-14 | 4 DE-South   | 1 | 2 | 1.799411 | #####    |  |
| 60 | 1 DE | 2020-14 | 4 DE-South   | 1 | 3 | 2.637456 | #####    |  |

|    |      |         |            |   |   |          |          |  |
|----|------|---------|------------|---|---|----------|----------|--|
| 1  |      |         |            |   |   |          |          |  |
| 2  |      |         |            |   |   |          |          |  |
| 3  | 1 DE | 2020-14 | 4 DE-South | 1 | 4 | 1.381518 | #####    |  |
| 4  | 1 DE | 2020-14 | 4 DE-South | 1 | 5 | #####    | #####    |  |
| 5  | 1 DE | 2020-14 | 4 DE-South | 2 | 1 | 1.224947 | #####    |  |
| 6  | 1 DE | 2020-14 | 4 DE-South | 2 | 2 | 1.598837 | #####    |  |
| 7  | 1 DE | 2020-14 | 4 DE-South | 2 | 3 | 1.971098 | #####    |  |
| 8  | 1 DE | 2020-14 | 4 DE-South | 2 | 4 | 1.234375 | #####    |  |
| 9  | 1 DE | 2020-14 | 4 DE-South | 2 | 5 | 0        | 0        |  |
| 10 | 1 DE | 2020-14 | 4 DE-South | 3 | 1 | 2.128613 | #####    |  |
| 11 | 1 DE | 2020-14 | 4 DE-South | 3 | 2 | 2.061224 | #####    |  |
| 12 | 1 DE | 2020-14 | 4 DE-South | 3 | 3 | 3.471264 | #####    |  |
| 13 | 1 DE | 2020-14 | 4 DE-South | 3 | 4 | 1.575    | #####    |  |
| 14 | 1 DE | 2020-14 | 4 DE-South | 3 | 5 | 0.25     | #####    |  |
| 15 | 1 DE | 2020-14 | 4 DE-West  | 1 | 1 | 1.958653 | #####    |  |
| 16 | 1 DE | 2020-14 | 4 DE-West  | 1 | 2 | 2.949892 | #####    |  |
| 17 | 1 DE | 2020-14 | 4 DE-West  | 1 | 3 | 2.883275 | #####    |  |
| 18 | 1 DE | 2020-14 | 4 DE-West  | 1 | 4 | 1.927408 | #####    |  |
| 19 | 1 DE | 2020-14 | 4 DE-West  | 1 | 5 | #####    | #####    |  |
| 20 | 1 DE | 2020-14 | 4 DE-West  | 2 | 1 | 1.612146 | #####    |  |
| 21 | 1 DE | 2020-14 | 4 DE-West  | 2 | 2 | 2.316832 | #####    |  |
| 22 | 1 DE | 2020-14 | 4 DE-West  | 2 | 3 | 2.53     | #####    |  |
| 23 | 1 DE | 2020-14 | 4 DE-West  | 2 | 4 | 1.715686 | #####    |  |
| 24 | 1 DE | 2020-14 | 4 DE-West  | 2 | 5 | #####    | #####    |  |
| 25 | 1 DE | 2020-14 | 4 DE-West  | 3 | 1 | 2.402658 | #####    |  |
| 26 | 1 DE | 2020-14 | 4 DE-West  | 3 | 2 | 3.461538 | 1.010098 |  |
| 27 | 1 DE | 2020-14 | 4 DE-West  | 3 | 3 | 3.367089 | #####    |  |
| 28 | 1 DE | 2020-14 | 4 DE-West  | 3 | 4 | 2.196721 | #####    |  |
| 29 | 1 DE | 2020-14 | 4 DE-West  | 3 | 5 | #####    | #####    |  |
| 30 | 1 DE | 2020-14 | 5 DE-East  | 1 | 1 | 2.063906 | #####    |  |
| 31 | 1 DE | 2020-14 | 5 DE-East  | 1 | 2 | 1.906973 | #####    |  |
| 32 | 1 DE | 2020-14 | 5 DE-East  | 1 | 3 | 2.26276  | #####    |  |
| 33 | 1 DE | 2020-14 | 5 DE-East  | 1 | 4 | 2.114095 | #####    |  |
| 34 | 1 DE | 2020-14 | 5 DE-East  | 1 | 5 | 1.857855 | #####    |  |
| 35 | 1 DE | 2020-14 | 5 DE-East  | 2 | 1 | 1.820133 | #####    |  |
| 36 | 1 DE | 2020-14 | 5 DE-East  | 2 | 2 | 1.656863 | #####    |  |
| 37 | 1 DE | 2020-14 | 5 DE-East  | 2 | 3 | 2.147368 | #####    |  |
| 38 | 1 DE | 2020-14 | 5 DE-East  | 2 | 4 | 1.99     | #####    |  |
| 39 | 1 DE | 2020-14 | 5 DE-East  | 2 | 5 | 1.34     | #####    |  |
| 40 | 1 DE | 2020-14 | 5 DE-East  | 3 | 1 | 2.398017 | #####    |  |
| 41 | 1 DE | 2020-14 | 5 DE-East  | 3 | 2 | 2.104167 | #####    |  |
| 42 | 1 DE | 2020-14 | 5 DE-East  | 3 | 3 | 2.445946 | #####    |  |
| 43 | 1 DE | 2020-14 | 5 DE-East  | 3 | 4 | 2.268657 | #####    |  |
| 44 | 1 DE | 2020-14 | 5 DE-East  | 3 | 5 | 2.805556 | #####    |  |
| 45 | 1 DE | 2020-14 | 5 DE-North | 1 | 1 | 2.173338 | #####    |  |
| 46 | 1 DE | 2020-14 | 5 DE-North | 1 | 2 | 1.89891  | #####    |  |
| 47 | 1 DE | 2020-14 | 5 DE-North | 1 | 3 | 2.129935 | #####    |  |
| 48 | 1 DE | 2020-14 | 5 DE-North | 1 | 4 | 2.657519 | #####    |  |
| 49 | 1 DE | 2020-14 | 5 DE-North | 1 | 5 | 1.888468 | #####    |  |
| 50 | 1 DE | 2020-14 | 5 DE-North | 2 | 1 | 1.753814 | #####    |  |
| 51 | 1 DE | 2020-14 | 5 DE-North | 2 | 2 | 1.895161 | #####    |  |
| 52 | 1 DE | 2020-14 | 5 DE-North | 2 | 3 | 1.625    | #####    |  |
| 53 | 1 DE | 2020-14 | 5 DE-North | 2 | 4 | 1.949153 | #####    |  |
| 54 | 1 DE | 2020-14 | 5 DE-North | 2 | 5 | 1.636364 | #####    |  |
| 55 | 1 DE | 2020-14 | 5 DE-North | 3 | 1 | 2.620557 | #####    |  |
| 56 | 1 DE | 2020-14 | 5 DE-North | 3 | 2 | 1.902439 | #####    |  |
| 57 | 1 DE | 2020-14 | 5 DE-North | 3 | 3 | 2.797101 | #####    |  |
| 58 | 1 DE | 2020-14 | 5 DE-North | 3 | 4 | 3.222222 | #####    |  |
| 59 | 1 DE | 2020-14 | 5 DE-North | 3 |   |          |          |  |
| 60 | 1 DE | 2020-14 | 5 DE-North | 3 |   |          |          |  |

|    |      |         |              |   |   |          |       |  |
|----|------|---------|--------------|---|---|----------|-------|--|
| 1  |      |         |              |   |   |          |       |  |
| 2  |      |         |              |   |   |          |       |  |
| 3  | 1 DE | 2020-14 | 5 DE-North   | 3 | 5 | 2.209302 | ##### |  |
| 4  | 1 DE | 2020-14 | 5 DE-Overall | 1 | 1 | 1.874625 | ##### |  |
| 5  | 1 DE | 2020-14 | 5 DE-Overall | 1 | 2 | 1.621599 | ##### |  |
| 6  | 1 DE | 2020-14 | 5 DE-Overall | 1 | 3 | 1.916625 | ##### |  |
| 7  | 1 DE | 2020-14 | 5 DE-Overall | 1 | 4 | 2.301257 | ##### |  |
| 8  | 1 DE | 2020-14 | 5 DE-Overall | 1 | 5 | 1.570656 | ##### |  |
| 9  | 1 DE | 2020-14 | 5 DE-Overall | 2 | 1 | 1.668879 | ##### |  |
| 10 | 1 DE | 2020-14 | 5 DE-Overall | 2 | 2 | 1.562697 | ##### |  |
| 11 | 1 DE | 2020-14 | 5 DE-Overall | 2 | 3 | 1.757901 | ##### |  |
| 12 | 1 DE | 2020-14 | 5 DE-Overall | 2 | 4 | 2.022327 | ##### |  |
| 13 | 1 DE | 2020-14 | 5 DE-Overall | 2 | 5 | 1.304007 | ##### |  |
| 14 | 1 DE | 2020-14 | 5 DE-Overall | 3 | 1 | 2.14066  | ##### |  |
| 15 | 1 DE | 2020-14 | 5 DE-Overall | 3 | 2 | 1.678116 | ##### |  |
| 16 | 1 DE | 2020-14 | 5 DE-Overall | 3 | 3 | 2.138678 | ##### |  |
| 17 | 1 DE | 2020-14 | 5 DE-Overall | 3 | 4 | 2.626079 | ##### |  |
| 18 | 1 DE | 2020-14 | 5 DE-Overall | 3 | 5 | 2.016734 | ##### |  |
| 19 | 1 DE | 2020-14 | 5 DE-South   | 1 | 1 | 1.515662 | ##### |  |
| 20 | 1 DE | 2020-14 | 5 DE-South   | 1 | 2 | 1.592316 | ##### |  |
| 21 | 1 DE | 2020-14 | 5 DE-South   | 1 | 3 | 1.439656 | ##### |  |
| 22 | 1 DE | 2020-14 | 5 DE-South   | 1 | 4 | 1.987971 | ##### |  |
| 23 | 1 DE | 2020-14 | 5 DE-South   | 1 | 5 | 1.121238 | ##### |  |
| 24 | 1 DE | 2020-14 | 5 DE-South   | 2 | 1 | 1.440339 | ##### |  |
| 25 | 1 DE | 2020-14 | 5 DE-South   | 2 | 2 | 1.607955 | ##### |  |
| 26 | 1 DE | 2020-14 | 5 DE-South   | 2 | 3 | 1.265193 | ##### |  |
| 27 | 1 DE | 2020-14 | 5 DE-South   | 2 | 4 | 2.253521 | ##### |  |
| 28 | 1 DE | 2020-14 | 5 DE-South   | 2 | 5 | #####    | ##### |  |
| 29 | 1 DE | 2020-14 | 5 DE-South   | 3 | 1 | 1.623927 | ##### |  |
| 30 | 1 DE | 2020-14 | 5 DE-South   | 3 | 2 | 1.571429 | ##### |  |
| 31 | 1 DE | 2020-14 | 5 DE-South   | 3 | 3 | 1.662921 | ##### |  |
| 32 | 1 DE | 2020-14 | 5 DE-South   | 3 | 4 | 1.619048 | ##### |  |
| 33 | 1 DE | 2020-14 | 5 DE-South   | 3 | 5 | 1.62069  | ##### |  |
| 34 | 1 DE | 2020-14 | 5 DE-South   | 3 | 5 | 1.62069  | ##### |  |
| 35 | 1 DE | 2020-14 | 5 DE-West    | 1 | 1 | 1.883946 | ##### |  |
| 36 | 1 DE | 2020-14 | 5 DE-West    | 1 | 2 | 1.346539 | ##### |  |
| 37 | 1 DE | 2020-14 | 5 DE-West    | 1 | 3 | 2.017436 | ##### |  |
| 38 | 1 DE | 2020-14 | 5 DE-West    | 1 | 4 | 2.3935   | ##### |  |
| 39 | 1 DE | 2020-14 | 5 DE-West    | 1 | 5 | 1.555784 | ##### |  |
| 40 | 1 DE | 2020-14 | 5 DE-West    | 2 | 1 | 1.727922 | ##### |  |
| 41 | 1 DE | 2020-14 | 5 DE-West    | 2 | 2 | 1.240385 | ##### |  |
| 42 | 1 DE | 2020-14 | 5 DE-West    | 2 | 3 | 1.995392 | ##### |  |
| 43 | 1 DE | 2020-14 | 5 DE-West    | 2 | 4 | 1.924528 | ##### |  |
| 44 | 1 DE | 2020-14 | 5 DE-West    | 2 | 5 | 1.464286 | ##### |  |
| 45 | 1 DE | 2020-14 | 5 DE-West    | 3 | 1 | 2.084488 | ##### |  |
| 46 | 1 DE | 2020-14 | 5 DE-West    | 3 | 2 | 1.428571 | ##### |  |
| 47 | 1 DE | 2020-14 | 5 DE-West    | 3 | 3 | 2.049383 | ##### |  |
| 48 | 1 DE | 2020-14 | 5 DE-West    | 3 | 4 | 2.984375 | ##### |  |
| 49 | 1 DE | 2020-14 | 5 DE-West    | 3 | 5 | 1.710526 | ##### |  |
| 50 | 1 DE | 2020-15 | 1 DE-East    | 1 | 1 | 5.607101 | ##### |  |
| 51 | 1 DE | 2020-15 | 1 DE-East    | 1 | 2 | 6.869049 | ##### |  |
| 52 | 1 DE | 2020-15 | 1 DE-East    | 1 | 3 | 6.094923 | ##### |  |
| 53 | 1 DE | 2020-15 | 1 DE-East    | 1 | 4 | 6.380642 | ##### |  |
| 54 | 1 DE | 2020-15 | 1 DE-East    | 1 | 5 | 3.726997 | ##### |  |
| 55 | 1 DE | 2020-15 | 1 DE-East    | 2 | 1 | 5.520609 | ##### |  |
| 56 | 1 DE | 2020-15 | 1 DE-East    | 2 | 2 | 6.8875   | ##### |  |
| 57 | 1 DE | 2020-15 | 1 DE-East    | 2 | 3 | 6.590909 | ##### |  |
| 58 | 1 DE | 2020-15 | 1 DE-East    | 2 | 4 | 5.961905 | ##### |  |
| 59 | 1 DE | 2020-15 | 1 DE-East    | 2 | 5 | 3.54717  | ##### |  |
| 60 | 1 DE | 2020-15 | 1 DE-East    | 2 | 5 | 3.54717  | ##### |  |

1  
2  
3  
4  
5  
6  
7  
8  
9  
10  
11  
12  
13  
14  
15  
16  
17  
18  
19  
20  
21  
22  
23  
24  
25  
26  
27  
28  
29  
30  
31  
32  
33  
34  
35  
36  
37  
38  
39  
40  
41  
42  
43  
44  
45  
46  
47  
48  
49  
50  
51  
52  
53  
54  
55  
56  
57  
58  
59  
60

|      |         |              |   |   |          |          |
|------|---------|--------------|---|---|----------|----------|
| 1 DE | 2020-15 | 1 DE-East    | 3 | 1 | 5.71468  | #####    |
| 1 DE | 2020-15 | 1 DE-East    | 3 | 2 | 6.852941 | 1.251461 |
| 1 DE | 2020-15 | 1 DE-East    | 3 | 3 | 5.452381 | #####    |
| 1 DE | 2020-15 | 1 DE-East    | 3 | 4 | 6.857143 | 1.014995 |
| 1 DE | 2020-15 | 1 DE-East    | 3 | 5 | 4        | #####    |
| 1 DE | 2020-15 | 1 DE-North   | 1 | 1 | 5.783948 | #####    |
| 1 DE | 2020-15 | 1 DE-North   | 1 | 2 | 7.022604 | #####    |
| 1 DE | 2020-15 | 1 DE-North   | 1 | 3 | 6.481942 | #####    |
| 1 DE | 2020-15 | 1 DE-North   | 1 | 4 | 6.449837 | #####    |
| 1 DE | 2020-15 | 1 DE-North   | 1 | 5 | 3.379021 | #####    |
| 1 DE | 2020-15 | 1 DE-North   | 2 | 1 | 4.935026 | #####    |
| 1 DE | 2020-15 | 1 DE-North   | 2 | 2 | 6.50495  | #####    |
| 1 DE | 2020-15 | 1 DE-North   | 2 | 3 | 5.62069  | #####    |
| 1 DE | 2020-15 | 1 DE-North   | 2 | 4 | 6.231884 | #####    |
| 1 DE | 2020-15 | 1 DE-North   | 2 | 5 | 2.535714 | #####    |
| 1 DE | 2020-15 | 1 DE-North   | 3 | 1 | 6.732159 | #####    |
| 1 DE | 2020-15 | 1 DE-North   | 3 | 2 | 7.53125  | 1.207942 |
| 1 DE | 2020-15 | 1 DE-North   | 3 | 3 | 7.287129 | #####    |
| 1 DE | 2020-15 | 1 DE-North   | 3 | 4 | 6.647059 | #####    |
| 1 DE | 2020-15 | 1 DE-North   | 3 | 5 | 5.057143 | #####    |
| 1 DE | 2020-15 | 1 DE-Overall | 1 | 1 | 5.706796 | #####    |
| 1 DE | 2020-15 | 1 DE-Overall | 1 | 2 | 6.056353 | #####    |
| 1 DE | 2020-15 | 1 DE-Overall | 1 | 3 | 6.380573 | #####    |
| 1 DE | 2020-15 | 1 DE-Overall | 1 | 4 | 6.406208 | #####    |
| 1 DE | 2020-15 | 1 DE-Overall | 1 | 5 | 3.596595 | #####    |
| 1 DE | 2020-15 | 1 DE-Overall | 2 | 1 | 5.362468 | #####    |
| 1 DE | 2020-15 | 1 DE-Overall | 2 | 2 | 5.915057 | #####    |
| 1 DE | 2020-15 | 1 DE-Overall | 2 | 3 | 6.299972 | #####    |
| 1 DE | 2020-15 | 1 DE-Overall | 2 | 4 | 6.040558 | #####    |
| 1 DE | 2020-15 | 1 DE-Overall | 2 | 5 | 3.068105 | #####    |
| 1 DE | 2020-15 | 1 DE-Overall | 3 | 1 | 6.124145 | #####    |
| 1 DE | 2020-15 | 1 DE-Overall | 3 | 2 | 6.192017 | #####    |
| 1 DE | 2020-15 | 1 DE-Overall | 3 | 3 | 6.477663 | #####    |
| 1 DE | 2020-15 | 1 DE-Overall | 3 | 4 | 6.818833 | #####    |
| 1 DE | 2020-15 | 1 DE-Overall | 3 | 5 | 4.424746 | #####    |
| 1 DE | 2020-15 | 1 DE-South   | 1 | 1 | 5.75492  | #####    |
| 1 DE | 2020-15 | 1 DE-South   | 1 | 2 | 5.809306 | #####    |
| 1 DE | 2020-15 | 1 DE-South   | 1 | 3 | 6.258271 | #####    |
| 1 DE | 2020-15 | 1 DE-South   | 1 | 4 | 6.724017 | #####    |
| 1 DE | 2020-15 | 1 DE-South   | 1 | 5 | 3.416207 | #####    |
| 1 DE | 2020-15 | 1 DE-South   | 2 | 1 | 5.066197 | #####    |
| 1 DE | 2020-15 | 1 DE-South   | 2 | 2 | 5.412214 | #####    |
| 1 DE | 2020-15 | 1 DE-South   | 2 | 3 | 5.662037 | #####    |
| 1 DE | 2020-15 | 1 DE-South   | 2 | 4 | 6.035294 | #####    |
| 1 DE | 2020-15 | 1 DE-South   | 2 | 5 | 2.736842 | #####    |
| 1 DE | 2020-15 | 1 DE-South   | 3 | 1 | 6.591028 | #####    |
| 1 DE | 2020-15 | 1 DE-South   | 3 | 2 | 6.204082 | #####    |
| 1 DE | 2020-15 | 1 DE-South   | 3 | 3 | 6.956897 | #####    |
| 1 DE | 2020-15 | 1 DE-South   | 3 | 4 | 7.5      | #####    |
| 1 DE | 2020-15 | 1 DE-South   | 3 | 5 | 4.607143 | 1.203105 |
| 1 DE | 2020-15 | 1 DE-West    | 1 | 1 | 5.677514 | #####    |
| 1 DE | 2020-15 | 1 DE-West    | 1 | 2 | 5.448142 | #####    |
| 1 DE | 2020-15 | 1 DE-West    | 1 | 3 | 6.575043 | #####    |
| 1 DE | 2020-15 | 1 DE-West    | 1 | 4 | 6.157978 | #####    |
| 1 DE | 2020-15 | 1 DE-West    | 1 | 5 | 3.776239 | #####    |
| 1 DE | 2020-15 | 1 DE-West    | 2 | 1 | 5.748812 | #####    |

|    |      |         |              |   |   |          |          |  |
|----|------|---------|--------------|---|---|----------|----------|--|
| 1  |      |         |              |   |   |          |          |  |
| 2  |      |         |              |   |   |          |          |  |
| 3  | 1 DE | 2020-15 | 1 DE-West    | 2 | 2 | 5.701923 | #####    |  |
| 4  | 1 DE | 2020-15 | 1 DE-West    | 2 | 3 | 6.996078 | #####    |  |
| 5  | 1 DE | 2020-15 | 1 DE-West    | 2 | 4 | 5.991525 | #####    |  |
| 6  | 1 DE | 2020-15 | 1 DE-West    | 2 | 5 | 3.387755 | #####    |  |
| 7  | 1 DE | 2020-15 | 1 DE-West    | 3 | 1 | 5.588327 | #####    |  |
| 8  | 1 DE | 2020-15 | 1 DE-West    | 3 | 2 | 5.205882 | 1.070893 |  |
| 9  | 1 DE | 2020-15 | 1 DE-West    | 3 | 3 | 6        | #####    |  |
| 10 | 1 DE | 2020-15 | 1 DE-West    | 3 | 4 | 6.371429 | #####    |  |
| 11 | 1 DE | 2020-15 | 1 DE-West    | 3 | 5 | 4.272727 | #####    |  |
| 12 | 1 DE | 2020-15 | 2 DE-East    | 1 | 1 | 1.798662 | #####    |  |
| 13 | 1 DE | 2020-15 | 2 DE-East    | 1 | 2 | 2.132348 | 0.22356  |  |
| 14 | 1 DE | 2020-15 | 2 DE-East    | 1 | 3 | 1.993548 | #####    |  |
| 15 | 1 DE | 2020-15 | 2 DE-East    | 1 | 4 | 1.784889 | #####    |  |
| 16 | 1 DE | 2020-15 | 2 DE-East    | 1 | 5 | 1.445103 | #####    |  |
| 17 | 1 DE | 2020-15 | 2 DE-East    | 2 | 1 | 1.822987 | #####    |  |
| 18 | 1 DE | 2020-15 | 2 DE-East    | 2 | 2 | 2.05814  | #####    |  |
| 19 | 1 DE | 2020-15 | 2 DE-East    | 2 | 3 | 2.253968 | #####    |  |
| 20 | 1 DE | 2020-15 | 2 DE-East    | 2 | 4 | 1.732143 | #####    |  |
| 21 | 1 DE | 2020-15 | 2 DE-East    | 2 | 5 | 1.351852 | #####    |  |
| 22 | 1 DE | 2020-15 | 2 DE-East    | 3 | 1 | 1.768907 | #####    |  |
| 23 | 1 DE | 2020-15 | 2 DE-East    | 3 | 2 | 2.2      | #####    |  |
| 24 | 1 DE | 2020-15 | 2 DE-East    | 3 | 3 | 1.647727 | #####    |  |
| 25 | 1 DE | 2020-15 | 2 DE-East    | 3 | 4 | 1.840909 | #####    |  |
| 26 | 1 DE | 2020-15 | 2 DE-East    | 3 | 5 | 1.583333 | #####    |  |
| 27 | 1 DE | 2020-15 | 2 DE-North   | 1 | 1 | 1.84942  | #####    |  |
| 28 | 1 DE | 2020-15 | 2 DE-North   | 1 | 2 | 2.184611 | #####    |  |
| 29 | 1 DE | 2020-15 | 2 DE-North   | 1 | 3 | 2.03245  | #####    |  |
| 30 | 1 DE | 2020-15 | 2 DE-North   | 1 | 4 | 1.846351 | #####    |  |
| 31 | 1 DE | 2020-15 | 2 DE-North   | 1 | 5 | 1.396833 | #####    |  |
| 32 | 1 DE | 2020-15 | 2 DE-North   | 2 | 1 | 1.77686  | #####    |  |
| 33 | 1 DE | 2020-15 | 2 DE-North   | 2 | 2 | 2.216216 | #####    |  |
| 34 | 1 DE | 2020-15 | 2 DE-North   | 2 | 3 | 2.086022 | #####    |  |
| 35 | 1 DE | 2020-15 | 2 DE-North   | 2 | 4 | 1.818182 | #####    |  |
| 36 | 1 DE | 2020-15 | 2 DE-North   | 2 | 5 | 1.214286 | #####    |  |
| 37 | 1 DE | 2020-15 | 2 DE-North   | 3 | 1 | 1.931616 | #####    |  |
| 38 | 1 DE | 2020-15 | 2 DE-North   | 3 | 2 | 2.151515 | #####    |  |
| 39 | 1 DE | 2020-15 | 2 DE-North   | 3 | 3 | 1.980952 | #####    |  |
| 40 | 1 DE | 2020-15 | 2 DE-North   | 3 | 4 | 1.872727 | #####    |  |
| 41 | 1 DE | 2020-15 | 2 DE-North   | 3 | 5 | 1.75     | #####    |  |
| 42 | 1 DE | 2020-15 | 2 DE-Overall | 1 | 1 | 1.873623 | #####    |  |
| 43 | 1 DE | 2020-15 | 2 DE-Overall | 1 | 2 | 2.231733 | #####    |  |
| 44 | 1 DE | 2020-15 | 2 DE-Overall | 1 | 3 | 2.042172 | #####    |  |
| 45 | 1 DE | 2020-15 | 2 DE-Overall | 1 | 4 | 1.792649 | #####    |  |
| 46 | 1 DE | 2020-15 | 2 DE-Overall | 1 | 5 | 1.453349 | #####    |  |
| 47 | 1 DE | 2020-15 | 2 DE-Overall | 2 | 1 | 1.827985 | #####    |  |
| 48 | 1 DE | 2020-15 | 2 DE-Overall | 2 | 2 | 2.12528  | #####    |  |
| 49 | 1 DE | 2020-15 | 2 DE-Overall | 2 | 3 | 2.14367  | #####    |  |
| 50 | 1 DE | 2020-15 | 2 DE-Overall | 2 | 4 | 1.752661 | #####    |  |
| 51 | 1 DE | 2020-15 | 2 DE-Overall | 2 | 5 | 1.277988 | #####    |  |
| 52 | 1 DE | 2020-15 | 2 DE-Overall | 3 | 1 | 1.928829 | #####    |  |
| 53 | 1 DE | 2020-15 | 2 DE-Overall | 3 | 2 | 2.338247 | #####    |  |
| 54 | 1 DE | 2020-15 | 2 DE-Overall | 3 | 3 | 1.919302 | #####    |  |
| 55 | 1 DE | 2020-15 | 2 DE-Overall | 3 | 4 | 1.837536 | #####    |  |
| 56 | 1 DE | 2020-15 | 2 DE-Overall | 3 | 5 | 1.720893 | #####    |  |
| 57 | 1 DE | 2020-15 | 2 DE-South   | 1 | 1 | 1.879028 | #####    |  |
| 58 | 1 DE | 2020-15 | 2 DE-South   | 1 | 2 | 2.2937   | #####    |  |
| 59 | 1 DE | 2020-15 | 2 DE-South   | 1 | 2 | 2.2937   | #####    |  |
| 60 | 1 DE | 2020-15 | 2 DE-South   | 1 | 2 | 2.2937   | #####    |  |

1  
2  
3  
4  
5  
6  
7  
8  
9  
10  
11  
12  
13  
14  
15  
16  
17  
18  
19  
20  
21  
22  
23  
24  
25  
26  
27  
28  
29  
30  
31  
32  
33  
34  
35  
36  
37  
38  
39  
40  
41  
42  
43  
44  
45  
46  
47  
48  
49  
50  
51  
52  
53  
54  
55  
56  
57  
58  
59  
60

|      |         |            |   |   |          |       |
|------|---------|------------|---|---|----------|-------|
| 1 DE | 2020-15 | 2 DE-South | 1 | 3 | 2        | ##### |
| 1 DE | 2020-15 | 2 DE-South | 1 | 4 | 1.859681 | ##### |
| 1 DE | 2020-15 | 2 DE-South | 1 | 5 | 1.243863 | ##### |
| 1 DE | 2020-15 | 2 DE-South | 2 | 1 | 1.811813 | ##### |
| 1 DE | 2020-15 | 2 DE-South | 2 | 2 | 2.194444 | ##### |
| 1 DE | 2020-15 | 2 DE-South | 2 | 3 | 2        | ##### |
| 1 DE | 2020-15 | 2 DE-South | 2 | 4 | 1.791209 | ##### |
| 1 DE | 2020-15 | 2 DE-South | 2 | 5 | 1.184211 | ##### |
| 1 DE | 2020-15 | 2 DE-South | 3 | 1 | 1.961555 | ##### |
| 1 DE | 2020-15 | 2 DE-South | 3 | 2 | 2.4      | ##### |
| 1 DE | 2020-15 | 2 DE-South | 3 | 3 | 2        | ##### |
| 1 DE | 2020-15 | 2 DE-South | 3 | 4 | 1.938462 | ##### |
| 1 DE | 2020-15 | 2 DE-South | 3 | 5 | 1.344828 | ##### |
| 1 DE | 2020-15 | 2 DE-West  | 1 | 1 | 1.924439 | ##### |
| 1 DE | 2020-15 | 2 DE-West  | 1 | 2 | 2.238681 | ##### |
| 1 DE | 2020-15 | 2 DE-West  | 1 | 3 | 2.109185 | ##### |
| 1 DE | 2020-15 | 2 DE-West  | 1 | 4 | 1.713974 | ##### |
| 1 DE | 2020-15 | 2 DE-West  | 1 | 5 | 1.647116 | ##### |
| 1 DE | 2020-15 | 2 DE-West  | 2 | 1 | 1.872316 | ##### |
| 1 DE | 2020-15 | 2 DE-West  | 2 | 2 | 2.035398 | ##### |
| 1 DE | 2020-15 | 2 DE-West  | 2 | 3 | 2.238806 | ##### |
| 1 DE | 2020-15 | 2 DE-West  | 2 | 4 | 1.701613 | ##### |
| 1 DE | 2020-15 | 2 DE-West  | 2 | 5 | 1.346939 | ##### |
| 1 DE | 2020-15 | 2 DE-West  | 3 | 1 | 1.988731 | ##### |
| 1 DE | 2020-15 | 2 DE-West  | 3 | 2 | 2.432432 | ##### |
| 1 DE | 2020-15 | 2 DE-West  | 3 | 3 | 1.935185 | ##### |
| 1 DE | 2020-15 | 2 DE-West  | 3 | 4 | 1.72973  | ##### |
| 1 DE | 2020-15 | 2 DE-West  | 3 | 5 | 2.022222 | ##### |
| 1 DE | 2020-15 | 3 DE-East  | 1 | 1 | #####    | ##### |
| 1 DE | 2020-15 | 3 DE-East  | 1 | 2 | 0        | 0     |
| 1 DE | 2020-15 | 3 DE-East  | 1 | 3 | #####    | ##### |
| 1 DE | 2020-15 | 3 DE-East  | 1 | 4 | #####    | ##### |
| 1 DE | 2020-15 | 3 DE-East  | 1 | 5 | #####    | ##### |
| 1 DE | 2020-15 | 3 DE-East  | 2 | 1 | #####    | ##### |
| 1 DE | 2020-15 | 3 DE-East  | 2 | 2 | 0        | 0     |
| 1 DE | 2020-15 | 3 DE-East  | 2 | 3 | #####    | ##### |
| 1 DE | 2020-15 | 3 DE-East  | 2 | 4 | #####    | ##### |
| 1 DE | 2020-15 | 3 DE-East  | 2 | 5 | #####    | ##### |
| 1 DE | 2020-15 | 3 DE-East  | 3 | 1 | #####    | ##### |
| 1 DE | 2020-15 | 3 DE-East  | 3 | 2 | 0        | 0     |
| 1 DE | 2020-15 | 3 DE-East  | 3 | 3 | 0        | 0     |
| 1 DE | 2020-15 | 3 DE-East  | 3 | 4 | #####    | ##### |
| 1 DE | 2020-15 | 3 DE-East  | 3 | 5 | 0        | 0     |
| 1 DE | 2020-15 | 3 DE-North | 1 | 1 | #####    | ##### |
| 1 DE | 2020-15 | 3 DE-North | 1 | 2 | #####    | ##### |
| 1 DE | 2020-15 | 3 DE-North | 1 | 3 | #####    | ##### |
| 1 DE | 2020-15 | 3 DE-North | 1 | 4 | #####    | ##### |
| 1 DE | 2020-15 | 3 DE-North | 1 | 5 | #####    | ##### |
| 1 DE | 2020-15 | 3 DE-North | 2 | 1 | #####    | ##### |
| 1 DE | 2020-15 | 3 DE-North | 2 | 2 | #####    | ##### |
| 1 DE | 2020-15 | 3 DE-North | 2 | 3 | #####    | ##### |
| 1 DE | 2020-15 | 3 DE-North | 2 | 4 | #####    | ##### |
| 1 DE | 2020-15 | 3 DE-North | 2 | 5 | #####    | ##### |
| 1 DE | 2020-15 | 3 DE-North | 3 | 1 | #####    | ##### |
| 1 DE | 2020-15 | 3 DE-North | 3 | 2 | 0        | 0     |
| 1 DE | 2020-15 | 3 DE-North | 3 | 3 | 0        | 0     |



|    |      |         |              |   |   |          |       |  |
|----|------|---------|--------------|---|---|----------|-------|--|
| 1  |      |         |              |   |   |          |       |  |
| 2  |      |         |              |   |   |          |       |  |
| 3  | 1 DE | 2020-15 | 3 DE-North   | 3 | 4 | 0        | 0     |  |
| 4  | 1 DE | 2020-15 | 3 DE-North   | 3 | 5 | #####    | ##### |  |
| 5  | 1 DE | 2020-15 | 3 DE-Overall | 1 | 1 | #####    | ##### |  |
| 6  | 1 DE | 2020-15 | 3 DE-Overall | 1 | 2 | #####    | ##### |  |
| 7  | 1 DE | 2020-15 | 3 DE-Overall | 1 | 3 | #####    | ##### |  |
| 8  | 1 DE | 2020-15 | 3 DE-Overall | 1 | 4 | #####    | ##### |  |
| 9  | 1 DE | 2020-15 | 3 DE-Overall | 1 | 5 | #####    | ##### |  |
| 10 | 1 DE | 2020-15 | 3 DE-Overall | 2 | 1 | #####    | ##### |  |
| 11 | 1 DE | 2020-15 | 3 DE-Overall | 2 | 2 | #####    | ##### |  |
| 12 | 1 DE | 2020-15 | 3 DE-Overall | 2 | 3 | #####    | ##### |  |
| 13 | 1 DE | 2020-15 | 3 DE-Overall | 2 | 4 | #####    | ##### |  |
| 14 | 1 DE | 2020-15 | 3 DE-Overall | 2 | 5 | #####    | ##### |  |
| 15 | 1 DE | 2020-15 | 3 DE-Overall | 3 | 1 | #####    | ##### |  |
| 16 | 1 DE | 2020-15 | 3 DE-Overall | 3 | 2 | 0        | 0     |  |
| 17 | 1 DE | 2020-15 | 3 DE-Overall | 3 | 3 | #####    | ##### |  |
| 18 | 1 DE | 2020-15 | 3 DE-Overall | 3 | 4 | #####    | ##### |  |
| 19 | 1 DE | 2020-15 | 3 DE-Overall | 3 | 5 | #####    | ##### |  |
| 20 | 1 DE | 2020-15 | 3 DE-South   | 1 | 1 | #####    | ##### |  |
| 21 | 1 DE | 2020-15 | 3 DE-South   | 1 | 2 | 0        | 0     |  |
| 22 | 1 DE | 2020-15 | 3 DE-South   | 1 | 3 | #####    | ##### |  |
| 23 | 1 DE | 2020-15 | 3 DE-South   | 1 | 4 | #####    | ##### |  |
| 24 | 1 DE | 2020-15 | 3 DE-South   | 1 | 5 | 0        | 0     |  |
| 25 | 1 DE | 2020-15 | 3 DE-South   | 2 | 1 | #####    | ##### |  |
| 26 | 1 DE | 2020-15 | 3 DE-South   | 2 | 2 | 0        | 0     |  |
| 27 | 1 DE | 2020-15 | 3 DE-South   | 2 | 3 | #####    | ##### |  |
| 28 | 1 DE | 2020-15 | 3 DE-South   | 2 | 4 | #####    | ##### |  |
| 29 | 1 DE | 2020-15 | 3 DE-South   | 2 | 5 | 0        | 0     |  |
| 30 | 1 DE | 2020-15 | 3 DE-South   | 3 | 1 | 0        | 0     |  |
| 31 | 1 DE | 2020-15 | 3 DE-South   | 3 | 2 | 0        | 0     |  |
| 32 | 1 DE | 2020-15 | 3 DE-South   | 3 | 3 | 0        | 0     |  |
| 33 | 1 DE | 2020-15 | 3 DE-South   | 3 | 4 | 0        | 0     |  |
| 34 | 1 DE | 2020-15 | 3 DE-South   | 3 | 5 | 0        | 0     |  |
| 35 | 1 DE | 2020-15 | 3 DE-South   | 3 | 5 | 0        | 0     |  |
| 36 | 1 DE | 2020-15 | 3 DE-West    | 1 | 1 | #####    | ##### |  |
| 37 | 1 DE | 2020-15 | 3 DE-West    | 1 | 2 | 0        | 0     |  |
| 38 | 1 DE | 2020-15 | 3 DE-West    | 1 | 3 | #####    | ##### |  |
| 39 | 1 DE | 2020-15 | 3 DE-West    | 1 | 4 | #####    | ##### |  |
| 40 | 1 DE | 2020-15 | 3 DE-West    | 1 | 5 | #####    | ##### |  |
| 41 | 1 DE | 2020-15 | 3 DE-West    | 2 | 1 | #####    | ##### |  |
| 42 | 1 DE | 2020-15 | 3 DE-West    | 2 | 2 | 0        | 0     |  |
| 43 | 1 DE | 2020-15 | 3 DE-West    | 2 | 3 | #####    | ##### |  |
| 44 | 1 DE | 2020-15 | 3 DE-West    | 2 | 4 | #####    | ##### |  |
| 45 | 1 DE | 2020-15 | 3 DE-West    | 2 | 5 | #####    | ##### |  |
| 46 | 1 DE | 2020-15 | 3 DE-West    | 3 | 1 | #####    | ##### |  |
| 47 | 1 DE | 2020-15 | 3 DE-West    | 3 | 2 | 0        | 0     |  |
| 48 | 1 DE | 2020-15 | 3 DE-West    | 3 | 3 | #####    | ##### |  |
| 49 | 1 DE | 2020-15 | 3 DE-West    | 3 | 4 | 0        | 0     |  |
| 50 | 1 DE | 2020-15 | 3 DE-West    | 3 | 5 | 0        | 0     |  |
| 51 | 1 DE | 2020-15 | 4 DE-East    | 1 | 1 | 1.841756 | ##### |  |
| 52 | 1 DE | 2020-15 | 4 DE-East    | 1 | 2 | 2.877783 | ##### |  |
| 53 | 1 DE | 2020-15 | 4 DE-East    | 1 | 3 | 2.218706 | ##### |  |
| 54 | 1 DE | 2020-15 | 4 DE-East    | 1 | 4 | 2.350821 | ##### |  |
| 55 | 1 DE | 2020-15 | 4 DE-East    | 1 | 5 | #####    | ##### |  |
| 56 | 1 DE | 2020-15 | 4 DE-East    | 2 | 1 | 1.683761 | ##### |  |
| 57 | 1 DE | 2020-15 | 4 DE-East    | 2 | 2 | 3.234568 | ##### |  |
| 58 | 1 DE | 2020-15 | 4 DE-East    | 2 | 3 | 2.161111 | ##### |  |
| 59 | 1 DE | 2020-15 | 4 DE-East    | 2 | 4 | 1.726415 | ##### |  |
| 60 | 1 DE | 2020-15 | 4 DE-East    | 2 | 4 | 1.726415 | ##### |  |

|    |      |         |              |   |   |          |         |
|----|------|---------|--------------|---|---|----------|---------|
| 1  |      |         |              |   |   |          |         |
| 2  |      |         |              |   |   |          |         |
| 3  | 1 DE | 2020-15 | 4 DE-East    | 2 | 5 | #####    | #####   |
| 4  | 1 DE | 2020-15 | 4 DE-East    | 3 | 1 | 2.034124 | #####   |
| 5  | 1 DE | 2020-15 | 4 DE-East    | 3 | 2 | 2.571429 | #####   |
| 6  | 1 DE | 2020-15 | 4 DE-East    | 3 | 3 | 2.294118 | #####   |
| 7  | 1 DE | 2020-15 | 4 DE-East    | 3 | 4 | 3.02439  | #####   |
| 8  | 1 DE | 2020-15 | 4 DE-East    | 3 | 5 | #####    | #####   |
| 9  | 1 DE | 2020-15 | 4 DE-North   | 1 | 1 | 1.724141 | #####   |
| 10 | 1 DE | 2020-15 | 4 DE-North   | 1 | 2 | 2.531224 | #####   |
| 11 | 1 DE | 2020-15 | 4 DE-North   | 1 | 3 | 2.216798 | #####   |
| 12 | 1 DE | 2020-15 | 4 DE-North   | 1 | 4 | 2.108597 | #####   |
| 13 | 1 DE | 2020-15 | 4 DE-North   | 1 | 5 | #####    | #####   |
| 14 | 1 DE | 2020-15 | 4 DE-North   | 2 | 1 | 1.360185 | #####   |
| 15 | 1 DE | 2020-15 | 4 DE-North   | 2 | 2 | 2.058824 | #####   |
| 16 | 1 DE | 2020-15 | 4 DE-North   | 2 | 3 | 1.491429 | #####   |
| 17 | 1 DE | 2020-15 | 4 DE-North   | 2 | 4 | 2.277778 | #####   |
| 18 | 1 DE | 2020-15 | 4 DE-North   | 2 | 5 | #####    | #####   |
| 19 | 1 DE | 2020-15 | 4 DE-North   | 3 | 1 | 2.132453 | #####   |
| 20 | 1 DE | 2020-15 | 4 DE-North   | 3 | 2 | 3        | 1.02799 |
| 21 | 1 DE | 2020-15 | 4 DE-North   | 3 | 3 | 2.892157 | #####   |
| 22 | 1 DE | 2020-15 | 4 DE-North   | 3 | 4 | 1.951923 | #####   |
| 23 | 1 DE | 2020-15 | 4 DE-North   | 3 | 5 | #####    | #####   |
| 24 | 1 DE | 2020-15 | 4 DE-North   | 3 | 5 | #####    | #####   |
| 25 | 1 DE | 2020-15 | 4 DE-Overall | 1 | 1 | 1.842681 | #####   |
| 26 | 1 DE | 2020-15 | 4 DE-Overall | 1 | 2 | 2.020109 | #####   |
| 27 | 1 DE | 2020-15 | 4 DE-Overall | 1 | 3 | 2.390506 | #####   |
| 28 | 1 DE | 2020-15 | 4 DE-Overall | 1 | 4 | 2.404416 | #####   |
| 29 | 1 DE | 2020-15 | 4 DE-Overall | 1 | 5 | #####    | #####   |
| 30 | 1 DE | 2020-15 | 4 DE-Overall | 2 | 1 | 1.653543 | #####   |
| 31 | 1 DE | 2020-15 | 4 DE-Overall | 2 | 2 | 1.947993 | #####   |
| 32 | 1 DE | 2020-15 | 4 DE-Overall | 2 | 3 | 2.256205 | #####   |
| 33 | 1 DE | 2020-15 | 4 DE-Overall | 2 | 4 | 2.071749 | #####   |
| 34 | 1 DE | 2020-15 | 4 DE-Overall | 2 | 5 | #####    | #####   |
| 35 | 1 DE | 2020-15 | 4 DE-Overall | 3 | 1 | 2.069089 | #####   |
| 36 | 1 DE | 2020-15 | 4 DE-Overall | 3 | 2 | 2.088992 | #####   |
| 37 | 1 DE | 2020-15 | 4 DE-Overall | 3 | 3 | 2.551753 | #####   |
| 38 | 1 DE | 2020-15 | 4 DE-Overall | 3 | 4 | 2.77251  | #####   |
| 39 | 1 DE | 2020-15 | 4 DE-Overall | 3 | 5 | #####    | #####   |
| 40 | 1 DE | 2020-15 | 4 DE-South   | 1 | 1 | 2.031553 | #####   |
| 41 | 1 DE | 2020-15 | 4 DE-South   | 1 | 2 | 2.027562 | #####   |
| 42 | 1 DE | 2020-15 | 4 DE-South   | 1 | 3 | 2.575653 | #####   |
| 43 | 1 DE | 2020-15 | 4 DE-South   | 1 | 4 | 2.674582 | #####   |
| 44 | 1 DE | 2020-15 | 4 DE-South   | 1 | 5 | #####    | #####   |
| 45 | 1 DE | 2020-15 | 4 DE-South   | 2 | 1 | 1.617487 | #####   |
| 46 | 1 DE | 2020-15 | 4 DE-South   | 2 | 2 | 1.810606 | #####   |
| 47 | 1 DE | 2020-15 | 4 DE-South   | 2 | 3 | 2.340909 | #####   |
| 48 | 1 DE | 2020-15 | 4 DE-South   | 2 | 4 | 1.813953 | #####   |
| 49 | 1 DE | 2020-15 | 4 DE-South   | 2 | 5 | 0        | 0       |
| 50 | 1 DE | 2020-15 | 4 DE-South   | 3 | 1 | 2.527895 | #####   |
| 51 | 1 DE | 2020-15 | 4 DE-South   | 3 | 2 | 2.244898 | #####   |
| 52 | 1 DE | 2020-15 | 4 DE-South   | 3 | 3 | 2.848739 | #####   |
| 53 | 1 DE | 2020-15 | 4 DE-South   | 3 | 4 | 3.625    | #####   |
| 54 | 1 DE | 2020-15 | 4 DE-South   | 3 | 5 | #####    | #####   |
| 55 | 1 DE | 2020-15 | 4 DE-West    | 1 | 1 | 1.755177 | #####   |
| 56 | 1 DE | 2020-15 | 4 DE-West    | 1 | 2 | 1.396237 | #####   |
| 57 | 1 DE | 2020-15 | 4 DE-West    | 1 | 3 | 2.399109 | #####   |
| 58 | 1 DE | 2020-15 | 4 DE-West    | 1 | 4 | 2.410435 | #####   |
| 59 | 1 DE | 2020-15 | 4 DE-West    | 1 | 5 | #####    | #####   |
| 60 | 1 DE | 2020-15 | 4 DE-West    | 1 | 5 | #####    | #####   |

|    |      |         |              |   |   |          |       |  |
|----|------|---------|--------------|---|---|----------|-------|--|
| 1  |      |         |              |   |   |          |       |  |
| 2  |      |         |              |   |   |          |       |  |
| 3  | 1 DE | 2020-15 | 4 DE-West    | 2 | 1 | 1.826695 | ##### |  |
| 4  | 1 DE | 2020-15 | 4 DE-West    | 2 | 2 | 1.514286 | ##### |  |
| 5  | 1 DE | 2020-15 | 4 DE-West    | 2 | 3 | 2.570313 | ##### |  |
| 6  | 1 DE | 2020-15 | 4 DE-West    | 2 | 4 | 2.333333 | ##### |  |
| 7  | 1 DE | 2020-15 | 4 DE-West    | 2 | 5 | #####    | ##### |  |
| 8  | 1 DE | 2020-15 | 4 DE-West    | 3 | 1 | 1.667253 | ##### |  |
| 9  | 1 DE | 2020-15 | 4 DE-West    | 3 | 2 | 1.285714 | ##### |  |
| 10 | 1 DE | 2020-15 | 4 DE-West    | 3 | 3 | 2.166667 | ##### |  |
| 11 | 1 DE | 2020-15 | 4 DE-West    | 3 | 4 | 2.506849 | ##### |  |
| 12 | 1 DE | 2020-15 | 4 DE-West    | 3 | 5 | #####    | ##### |  |
| 13 | 1 DE | 2020-15 | 5 DE-East    | 1 | 1 | 2.247847 | ##### |  |
| 14 | 1 DE | 2020-15 | 5 DE-East    | 1 | 2 | 2.459852 | ##### |  |
| 15 | 1 DE | 2020-15 | 5 DE-East    | 1 | 3 | 2.200101 | ##### |  |
| 16 | 1 DE | 2020-15 | 5 DE-East    | 1 | 4 | 2.363594 | ##### |  |
| 17 | 1 DE | 2020-15 | 5 DE-East    | 1 | 5 | 2.082065 | ##### |  |
| 18 | 1 DE | 2020-15 | 5 DE-East    | 2 | 1 | 2.218443 | ##### |  |
| 19 | 1 DE | 2020-15 | 5 DE-East    | 2 | 2 | 2.082353 | ##### |  |
| 20 | 1 DE | 2020-15 | 5 DE-East    | 2 | 3 | 2.467391 | ##### |  |
| 21 | 1 DE | 2020-15 | 5 DE-East    | 2 | 4 | 2.423423 | ##### |  |
| 22 | 1 DE | 2020-15 | 5 DE-East    | 2 | 5 | 1.792453 | ##### |  |
| 23 | 1 DE | 2020-15 | 5 DE-East    | 3 | 1 | 2.284204 | ##### |  |
| 24 | 1 DE | 2020-15 | 5 DE-East    | 3 | 2 | 2.8      | ##### |  |
| 25 | 1 DE | 2020-15 | 5 DE-East    | 3 | 3 | 1.850575 | ##### |  |
| 26 | 1 DE | 2020-15 | 5 DE-East    | 3 | 4 | 2.297619 | ##### |  |
| 27 | 1 DE | 2020-15 | 5 DE-East    | 3 | 5 | 2.521739 | ##### |  |
| 28 | 1 DE | 2020-15 | 5 DE-East    | 3 | 5 | 2.521739 | ##### |  |
| 29 | 1 DE | 2020-15 | 5 DE-North   | 1 | 1 | 2.325531 | ##### |  |
| 30 | 1 DE | 2020-15 | 5 DE-North   | 1 | 2 | 2.562932 | ##### |  |
| 31 | 1 DE | 2020-15 | 5 DE-North   | 1 | 3 | 2.419166 | ##### |  |
| 32 | 1 DE | 2020-15 | 5 DE-North   | 1 | 4 | 2.489423 | ##### |  |
| 33 | 1 DE | 2020-15 | 5 DE-North   | 1 | 5 | 1.852322 | ##### |  |
| 34 | 1 DE | 2020-15 | 5 DE-North   | 2 | 1 | 1.821397 | ##### |  |
| 35 | 1 DE | 2020-15 | 5 DE-North   | 2 | 2 | 2.550459 | ##### |  |
| 36 | 1 DE | 2020-15 | 5 DE-North   | 2 | 3 | 2.032432 | ##### |  |
| 37 | 1 DE | 2020-15 | 5 DE-North   | 2 | 4 | 1.945205 | ##### |  |
| 38 | 1 DE | 2020-15 | 5 DE-North   | 2 | 5 | 1.160714 | ##### |  |
| 39 | 1 DE | 2020-15 | 5 DE-North   | 3 | 1 | 2.896231 | ##### |  |
| 40 | 1 DE | 2020-15 | 5 DE-North   | 3 | 2 | 2.575758 | ##### |  |
| 41 | 1 DE | 2020-15 | 5 DE-North   | 3 | 3 | 2.796117 | ##### |  |
| 42 | 1 DE | 2020-15 | 5 DE-North   | 3 | 4 | 2.981481 | ##### |  |
| 43 | 1 DE | 2020-15 | 5 DE-North   | 3 | 5 | 3.228571 | ##### |  |
| 44 | 1 DE | 2020-15 | 5 DE-Overall | 1 | 1 | 2.124983 | ##### |  |
| 45 | 1 DE | 2020-15 | 5 DE-Overall | 1 | 2 | 1.977102 | ##### |  |
| 46 | 1 DE | 2020-15 | 5 DE-Overall | 1 | 3 | 2.180378 | ##### |  |
| 47 | 1 DE | 2020-15 | 5 DE-Overall | 1 | 4 | 2.24377  | ##### |  |
| 48 | 1 DE | 2020-15 | 5 DE-Overall | 1 | 5 | 1.992085 | ##### |  |
| 49 | 1 DE | 2020-15 | 5 DE-Overall | 2 | 1 | 1.949818 | ##### |  |
| 50 | 1 DE | 2020-15 | 5 DE-Overall | 2 | 2 | 1.971102 | ##### |  |
| 51 | 1 DE | 2020-15 | 5 DE-Overall | 2 | 3 | 2.050565 | ##### |  |
| 52 | 1 DE | 2020-15 | 5 DE-Overall | 2 | 4 | 2.125788 | ##### |  |
| 53 | 1 DE | 2020-15 | 5 DE-Overall | 2 | 5 | 1.601402 | ##### |  |
| 54 | 1 DE | 2020-15 | 5 DE-Overall | 3 | 1 | 2.339373 | ##### |  |
| 55 | 1 DE | 2020-15 | 5 DE-Overall | 3 | 2 | 1.983107 | ##### |  |
| 56 | 1 DE | 2020-15 | 5 DE-Overall | 3 | 3 | 2.338788 | ##### |  |
| 57 | 1 DE | 2020-15 | 5 DE-Overall | 3 | 4 | 2.377528 | ##### |  |
| 58 | 1 DE | 2020-15 | 5 DE-Overall | 3 | 5 | 2.604289 | ##### |  |
| 59 | 1 DE | 2020-15 | 5 DE-Overall | 3 | 5 | 2.604289 | ##### |  |
| 60 | 1 DE | 2020-15 | 5 DE-South   | 1 | 1 | 2.058955 | ##### |  |

|    |      |         |             |   |   |          |          |  |
|----|------|---------|-------------|---|---|----------|----------|--|
| 1  |      |         |             |   |   |          |          |  |
| 2  |      |         |             |   |   |          |          |  |
| 3  | 1 DE | 2020-15 | 5 DE-South  | 1 | 2 | 1.488276 | #####    |  |
| 4  | 1 DE | 2020-15 | 5 DE-South  | 1 | 3 | 2.089033 | #####    |  |
| 5  | 1 DE | 2020-15 | 5 DE-South  | 1 | 4 | 2.398114 | #####    |  |
| 6  | 1 DE | 2020-15 | 5 DE-South  | 1 | 5 | 2.091344 | #####    |  |
| 7  | 1 DE | 2020-15 | 5 DE-South  | 2 | 1 | 1.780565 | #####    |  |
| 8  | 1 DE | 2020-15 | 5 DE-South  | 2 | 2 | 1.373239 | #####    |  |
| 9  | 1 DE | 2020-15 | 5 DE-South  | 2 | 3 | 1.662281 | #####    |  |
| 10 | 1 DE | 2020-15 | 5 DE-South  | 2 | 4 | 2.454545 | #####    |  |
| 11 | 1 DE | 2020-15 | 5 DE-South  | 2 | 5 | 1.552632 | #####    |  |
| 12 | 1 DE | 2020-15 | 5 DE-South  | 3 | 1 | 2.404183 | #####    |  |
| 13 | 1 DE | 2020-15 | 5 DE-South  | 3 | 2 | 1.612245 | 0.340067 |  |
| 14 | 1 DE | 2020-15 | 5 DE-South  | 3 | 3 | 2.595041 | #####    |  |
| 15 | 1 DE | 2020-15 | 5 DE-South  | 3 | 4 | 2.333333 | #####    |  |
| 16 | 1 DE | 2020-15 | 5 DE-South  | 3 | 5 | 3.035714 | #####    |  |
| 17 | 1 DE | 2020-15 | 5 DE-West   | 1 | 1 | 1.99558  | #####    |  |
| 18 | 1 DE | 2020-15 | 5 DE-West   | 1 | 2 | 1.92732  | #####    |  |
| 19 | 1 DE | 2020-15 | 5 DE-West   | 1 | 3 | 2.126072 | #####    |  |
| 20 | 1 DE | 2020-15 | 5 DE-West   | 1 | 4 | 1.902894 | #####    |  |
| 21 | 1 DE | 2020-15 | 5 DE-West   | 1 | 5 | 1.948312 | #####    |  |
| 22 | 1 DE | 2020-15 | 5 DE-West   | 2 | 1 | 2.012552 | #####    |  |
| 23 | 1 DE | 2020-15 | 5 DE-West   | 2 | 2 | 2.198198 | #####    |  |
| 24 | 1 DE | 2020-15 | 5 DE-West   | 2 | 3 | 2.190114 | #####    |  |
| 25 | 1 DE | 2020-15 | 5 DE-West   | 2 | 4 | 1.818182 | #####    |  |
| 26 | 1 DE | 2020-15 | 5 DE-West   | 2 | 5 | 1.836735 | #####    |  |
| 27 | 1 DE | 2020-15 | 5 DE-West   | 3 | 1 | 1.9742   | #####    |  |
| 28 | 1 DE | 2020-15 | 5 DE-West   | 3 | 2 | 1.666667 | #####    |  |
| 29 | 1 DE | 2020-15 | 5 DE-West   | 3 | 3 | 2.038462 | #####    |  |
| 30 | 1 DE | 2020-15 | 5 DE-West   | 3 | 4 | 2.014286 | #####    |  |
| 31 | 1 DE | 2020-15 | 5 DE-West   | 3 | 5 | 2.090909 | #####    |  |
| 32 | 1 DE | 2020-15 | 5 DE-West   | 3 | 5 | 2.090909 | #####    |  |
| 33 | 1 ES | 2020-12 | 1 ES-Center | 1 | 1 | 3.699072 | #####    |  |
| 34 | 1 ES | 2020-12 | 1 ES-Center | 1 | 2 | 4        | 0        |  |
| 35 | 1 ES | 2020-12 | 1 ES-Center | 1 | 3 | 6        | 2.828691 |  |
| 36 | 1 ES | 2020-12 | 1 ES-Center | 1 | 4 | 2.353998 | #####    |  |
| 37 | 1 ES | 2020-12 | 1 ES-Center | 2 | 1 | 4.083299 | 1.223268 |  |
| 38 | 1 ES | 2020-12 | 1 ES-Center | 2 | 3 | 6        | 2.828691 |  |
| 39 | 1 ES | 2020-12 | 1 ES-Center | 2 | 4 | 3.25     | 1.023265 |  |
| 40 | 1 ES | 2020-12 | 1 ES-Center | 3 | 1 | 3.583383 | #####    |  |
| 41 | 1 ES | 2020-12 | 1 ES-Center | 3 | 2 | 4        | 0        |  |
| 42 | 1 ES | 2020-12 | 1 ES-Center | 3 | 4 | 1        | 0        |  |
| 43 | 1 ES | 2020-12 | 1 ES-East   | 1 | 1 | 3.620388 | #####    |  |
| 44 | 1 ES | 2020-12 | 1 ES-East   | 1 | 2 | 2        | #####    |  |
| 45 | 1 ES | 2020-12 | 1 ES-East   | 1 | 3 | 5.842774 | 1.620085 |  |
| 46 | 1 ES | 2020-12 | 1 ES-East   | 1 | 4 | 3.33488  | 1.026168 |  |
| 47 | 1 ES | 2020-12 | 1 ES-East   | 1 | 5 | 1        | 0        |  |
| 48 | 1 ES | 2020-12 | 1 ES-East   | 2 | 1 | 2.523203 | #####    |  |
| 49 | 1 ES | 2020-12 | 1 ES-East   | 2 | 2 | 2        | #####    |  |
| 50 | 1 ES | 2020-12 | 1 ES-East   | 2 | 3 | 5.5      | 2.25021  |  |
| 51 | 1 ES | 2020-12 | 1 ES-East   | 2 | 4 | 2.142857 | #####    |  |
| 52 | 1 ES | 2020-12 | 1 ES-East   | 2 | 5 | 1        | 0        |  |
| 53 | 1 ES | 2020-12 | 1 ES-East   | 3 | 1 | 5.852073 | 1.586205 |  |
| 54 | 1 ES | 2020-12 | 1 ES-East   | 3 | 3 | 6        | 2.121518 |  |
| 55 | 1 ES | 2020-12 | 1 ES-East   | 3 | 4 | 5.5      | 1.767932 |  |
| 56 | 1 ES | 2020-12 | 1 ES-Island | 1 | 1 | 3.494778 | 1.20726  |  |
| 57 | 1 ES | 2020-12 | 1 ES-Island | 1 | 3 | 5.75     | 3.305134 |  |
| 58 | 1 ES | 2020-12 | 1 ES-Island | 1 | 4 | 4.559857 | 1.530196 |  |
| 59 | 1 ES | 2020-12 | 1 ES-Island | 1 | 5 | 1.596435 | #####    |  |
| 60 | 1 ES | 2020-12 | 1 ES-Island | 1 | 5 | 1.596435 | #####    |  |

|    |      |         |              |   |   |          |          |  |
|----|------|---------|--------------|---|---|----------|----------|--|
| 1  |      |         |              |   |   |          |          |  |
| 2  |      |         |              |   |   |          |          |  |
| 3  | 1 ES | 2020-12 | 1 ES-Island  | 2 | 1 | 3.503735 | 1.609013 |  |
| 4  | 1 ES | 2020-12 | 1 ES-Island  | 2 | 3 | 5.75     | 3.305134 |  |
| 5  | 1 ES | 2020-12 | 1 ES-Island  | 2 | 4 | 2        | 0        |  |
| 6  | 1 ES | 2020-12 | 1 ES-Island  | 2 | 5 | 1.666667 | #####    |  |
| 7  | 1 ES | 2020-12 | 1 ES-Island  | 3 | 1 | 3.475329 | 1.567005 |  |
| 8  | 1 ES | 2020-12 | 1 ES-Island  | 3 | 4 | 7        | 0        |  |
| 9  | 1 ES | 2020-12 | 1 ES-Island  | 3 | 5 | 1.5      | #####    |  |
| 10 | 1 ES | 2020-12 | 1 ES-Madrid  | 1 | 1 | 2.506762 | #####    |  |
| 11 | 1 ES | 2020-12 | 1 ES-Madrid  | 1 | 2 | 3        | #####    |  |
| 12 | 1 ES | 2020-12 | 1 ES-Madrid  | 1 | 3 | 1        | 0        |  |
| 13 | 1 ES | 2020-12 | 1 ES-Madrid  | 1 | 4 | 3        | 0        |  |
| 14 | 1 ES | 2020-12 | 1 ES-Madrid  | 1 | 5 | 3        | 0        |  |
| 15 | 1 ES | 2020-12 | 1 ES-Madrid  | 2 | 1 | 2.399609 | #####    |  |
| 16 | 1 ES | 2020-12 | 1 ES-Madrid  | 2 | 2 | 3        | #####    |  |
| 17 | 1 ES | 2020-12 | 1 ES-Madrid  | 2 | 3 | 1        | 0        |  |
| 18 | 1 ES | 2020-12 | 1 ES-Madrid  | 2 | 4 | 3        | 0        |  |
| 19 | 1 ES | 2020-12 | 1 ES-Madrid  | 3 | 1 | 3        | 0        |  |
| 20 | 1 ES | 2020-12 | 1 ES-Madrid  | 3 | 5 | 3        | 0        |  |
| 21 | 1 ES | 2020-12 | 1 ES-Northea | 1 | 1 | 3.354281 | #####    |  |
| 22 | 1 ES | 2020-12 | 1 ES-Northea | 1 | 2 | 6        | 0        |  |
| 23 | 1 ES | 2020-12 | 1 ES-Northea | 1 | 3 | 4        | #####    |  |
| 24 | 1 ES | 2020-12 | 1 ES-Northea | 1 | 4 | 2.015793 | 1.304597 |  |
| 25 | 1 ES | 2020-12 | 1 ES-Northea | 1 | 5 | 2.145155 | #####    |  |
| 26 | 1 ES | 2020-12 | 1 ES-Northea | 2 | 1 | 3.167366 | 1.181361 |  |
| 27 | 1 ES | 2020-12 | 1 ES-Northea | 2 | 3 | 4        | #####    |  |
| 28 | 1 ES | 2020-12 | 1 ES-Northea | 2 | 4 | 3        | 2.465996 |  |
| 29 | 1 ES | 2020-12 | 1 ES-Northea | 2 | 5 | 3        | 0        |  |
| 30 | 1 ES | 2020-12 | 1 ES-Northea | 3 | 1 | 3.483672 | 1.407973 |  |
| 31 | 1 ES | 2020-12 | 1 ES-Northea | 3 | 2 | 6        | 0        |  |
| 32 | 1 ES | 2020-12 | 1 ES-Northea | 3 | 4 | 1        | 0        |  |
| 33 | 1 ES | 2020-12 | 1 ES-Northea | 3 | 5 | 1        | 0        |  |
| 34 | 1 ES | 2020-12 | 1 ES-Northea | 3 | 5 | 1        | 0        |  |
| 35 | 1 ES | 2020-12 | 1 ES-Northw  | 1 | 1 | 6.691644 | 1.789695 |  |
| 36 | 1 ES | 2020-12 | 1 ES-Northw  | 1 | 2 | 2.5      | #####    |  |
| 37 | 1 ES | 2020-12 | 1 ES-Northw  | 1 | 3 | 8.431461 | 3.907707 |  |
| 38 | 1 ES | 2020-12 | 1 ES-Northw  | 1 | 4 | 5.189564 | 2.442125 |  |
| 39 | 1 ES | 2020-12 | 1 ES-Northw  | 1 | 5 | 7.407631 | #####    |  |
| 40 | 1 ES | 2020-12 | 1 ES-Northw  | 2 | 1 | 5.252752 | 1.30182  |  |
| 41 | 1 ES | 2020-12 | 1 ES-Northw  | 2 | 2 | 2.5      | #####    |  |
| 42 | 1 ES | 2020-12 | 1 ES-Northw  | 2 | 3 | 3.333333 | #####    |  |
| 43 | 1 ES | 2020-12 | 1 ES-Northw  | 2 | 4 | 8        | 4.344942 |  |
| 44 | 1 ES | 2020-12 | 1 ES-Northw  | 2 | 5 | 7        | 0        |  |
| 45 | 1 ES | 2020-12 | 1 ES-Northw  | 3 | 1 | 8.508274 | 3.537519 |  |
| 46 | 1 ES | 2020-12 | 1 ES-Northw  | 3 | 3 | 13       | 6.364555 |  |
| 47 | 1 ES | 2020-12 | 1 ES-Northw  | 3 | 4 | 2.5      | #####    |  |
| 48 | 1 ES | 2020-12 | 1 ES-Northw  | 3 | 5 | 8        | 0        |  |
| 49 | 1 ES | 2020-12 | 1 ES-Overall | 1 | 1 | 3.7909   | #####    |  |
| 50 | 1 ES | 2020-12 | 1 ES-Overall | 1 | 2 | 2.798925 | #####    |  |
| 51 | 1 ES | 2020-12 | 1 ES-Overall | 1 | 3 | 6.091193 | 1.212667 |  |
| 52 | 1 ES | 2020-12 | 1 ES-Overall | 1 | 4 | 3.568061 | #####    |  |
| 53 | 1 ES | 2020-12 | 1 ES-Overall | 1 | 5 | 3.23425  | #####    |  |
| 54 | 1 ES | 2020-12 | 1 ES-Overall | 2 | 1 | 3.37466  | #####    |  |
| 55 | 1 ES | 2020-12 | 1 ES-Overall | 2 | 2 | 2.599045 | #####    |  |
| 56 | 1 ES | 2020-12 | 1 ES-Overall | 2 | 3 | 4.869154 | #####    |  |
| 57 | 1 ES | 2020-12 | 1 ES-Overall | 2 | 4 | 3.119297 | #####    |  |
| 58 | 1 ES | 2020-12 | 1 ES-Overall | 2 | 5 | 3.250544 | 1.088386 |  |
| 59 | 1 ES | 2020-12 | 1 ES-Overall | 3 | 1 | 4.298636 | #####    |  |
| 60 | 1 ES | 2020-12 | 1 ES-Overall | 3 | 1 | 4.298636 | #####    |  |

|    |      |         |              |   |   |          |          |
|----|------|---------|--------------|---|---|----------|----------|
| 1  |      |         |              |   |   |          |          |
| 2  |      |         |              |   |   |          |          |
| 3  | 1 ES | 2020-12 | 1 ES-Overall | 3 | 2 | 3.012626 | 1.210875 |
| 4  | 1 ES | 2020-12 | 1 ES-Overall | 3 | 3 | 7.960566 | 2.739142 |
| 5  | 1 ES | 2020-12 | 1 ES-Overall | 3 | 4 | 4.094934 | 1.027549 |
| 6  | 1 ES | 2020-12 | 1 ES-Overall | 3 | 5 | 3.212175 | 1.331383 |
| 7  | 1 ES | 2020-12 | 1 ES-South   | 1 | 1 | 3.098577 | 1.17661  |
| 8  | 1 ES | 2020-12 | 1 ES-South   | 1 | 2 | 1.682352 | 1.018265 |
| 9  | 1 ES | 2020-12 | 1 ES-South   | 1 | 3 | 6.5      | 1.785524 |
| 10 | 1 ES | 2020-12 | 1 ES-South   | 1 | 4 | 5.076391 | 1.898841 |
| 11 | 1 ES | 2020-12 | 1 ES-South   | 2 | 1 | 3.869491 | #####    |
| 12 | 1 ES | 2020-12 | 1 ES-South   | 2 | 2 | 3.25     | #####    |
| 13 | 1 ES | 2020-12 | 1 ES-South   | 2 | 3 | 6.5      | 1.785524 |
| 14 | 1 ES | 2020-12 | 1 ES-South   | 2 | 4 | 1.5      | 1.060759 |
| 15 | 1 ES | 2020-12 | 1 ES-South   | 3 | 1 | 2.148234 | 1.936499 |
| 16 | 1 ES | 2020-12 | 1 ES-South   | 3 | 2 | 0        | 0        |
| 17 | 1 ES | 2020-12 | 1 ES-South   | 3 | 4 | 7        | 2.121518 |
| 18 | 1 ES | 2020-12 | 2 ES-Center  | 1 | 1 | 2.570451 | #####    |
| 19 | 1 ES | 2020-12 | 2 ES-Center  | 1 | 2 | 2.666667 | #####    |
| 20 | 1 ES | 2020-12 | 2 ES-Center  | 1 | 3 | 3.666667 | #####    |
| 21 | 1 ES | 2020-12 | 2 ES-Center  | 1 | 4 | 1.902665 | #####    |
| 22 | 1 ES | 2020-12 | 2 ES-Center  | 2 | 1 | 2.96051  | #####    |
| 23 | 1 ES | 2020-12 | 2 ES-Center  | 2 | 3 | 3.666667 | #####    |
| 24 | 1 ES | 2020-12 | 2 ES-Center  | 2 | 4 | 2.5      | #####    |
| 25 | 1 ES | 2020-12 | 2 ES-Center  | 3 | 1 | 2.435213 | #####    |
| 26 | 1 ES | 2020-12 | 2 ES-Center  | 3 | 2 | 2.666667 | #####    |
| 27 | 1 ES | 2020-12 | 2 ES-Center  | 3 | 4 | 1        | 0        |
| 28 | 1 ES | 2020-12 | 2 ES-East    | 1 | 1 | 2.061047 | #####    |
| 29 | 1 ES | 2020-12 | 2 ES-East    | 1 | 2 | 1.833333 | #####    |
| 30 | 1 ES | 2020-12 | 2 ES-East    | 1 | 3 | 2.342774 | #####    |
| 31 | 1 ES | 2020-12 | 2 ES-East    | 1 | 4 | 2.177535 | #####    |
| 32 | 1 ES | 2020-12 | 2 ES-East    | 1 | 5 | 1        | 0        |
| 33 | 1 ES | 2020-12 | 2 ES-East    | 2 | 1 | 1.84524  | #####    |
| 34 | 1 ES | 2020-12 | 2 ES-East    | 2 | 2 | 1.833333 | #####    |
| 35 | 1 ES | 2020-12 | 2 ES-East    | 2 | 3 | 2        | #####    |
| 36 | 1 ES | 2020-12 | 2 ES-East    | 2 | 4 | 2        | #####    |
| 37 | 1 ES | 2020-12 | 2 ES-East    | 2 | 5 | 1        | 0        |
| 38 | 1 ES | 2020-12 | 2 ES-East    | 3 | 1 | 2.5      | #####    |
| 39 | 1 ES | 2020-12 | 2 ES-East    | 3 | 3 | 2.5      | #####    |
| 40 | 1 ES | 2020-12 | 2 ES-East    | 3 | 4 | 2.5      | #####    |
| 41 | 1 ES | 2020-12 | 2 ES-Island  | 1 | 1 | 1.634397 | #####    |
| 42 | 1 ES | 2020-12 | 2 ES-Island  | 1 | 3 | 2        | #####    |
| 43 | 1 ES | 2020-12 | 2 ES-Island  | 1 | 4 | 2.267957 | #####    |
| 44 | 1 ES | 2020-12 | 2 ES-Island  | 1 | 5 | 1        | 0        |
| 45 | 1 ES | 2020-12 | 2 ES-Island  | 2 | 1 | 1.602682 | #####    |
| 46 | 1 ES | 2020-12 | 2 ES-Island  | 2 | 3 | 2        | #####    |
| 47 | 1 ES | 2020-12 | 2 ES-Island  | 2 | 4 | 1.5      | #####    |
| 48 | 1 ES | 2020-12 | 2 ES-Island  | 2 | 5 | 1        | 0        |
| 49 | 1 ES | 2020-12 | 2 ES-Island  | 3 | 1 | 1.718302 | #####    |
| 50 | 1 ES | 2020-12 | 2 ES-Island  | 3 | 4 | 3        | 0        |
| 51 | 1 ES | 2020-12 | 2 ES-Island  | 3 | 5 | 1        | 0        |
| 52 | 1 ES | 2020-12 | 2 ES-Madrid  | 1 | 1 | 1.682337 | #####    |
| 53 | 1 ES | 2020-12 | 2 ES-Madrid  | 1 | 2 | 1.666667 | #####    |
| 54 | 1 ES | 2020-12 | 2 ES-Madrid  | 1 | 3 | 1        | 0        |
| 55 | 1 ES | 2020-12 | 2 ES-Madrid  | 1 | 4 | 3        | 0        |
| 56 | 1 ES | 2020-12 | 2 ES-Madrid  | 1 | 5 | 2        | 0        |
| 57 | 1 ES | 2020-12 | 2 ES-Madrid  | 2 | 1 | 1.613327 | #####    |
| 58 | 1 ES | 2020-12 | 2 ES-Madrid  | 2 | 2 | 1.666667 | #####    |
| 59 | 1 ES | 2020-12 | 2 ES-Madrid  | 2 | 2 | 1.666667 | #####    |
| 60 | 1 ES | 2020-12 | 2 ES-Madrid  | 2 | 2 | 1.666667 | #####    |

|    |      |         |              |   |   |          |          |  |
|----|------|---------|--------------|---|---|----------|----------|--|
| 1  |      |         |              |   |   |          |          |  |
| 2  |      |         |              |   |   |          |          |  |
| 3  | 1 ES | 2020-12 | 2 ES-Madrid  | 2 | 3 | 1        | 0        |  |
| 4  | 1 ES | 2020-12 | 2 ES-Madrid  | 2 | 4 | 3        | 0        |  |
| 5  | 1 ES | 2020-12 | 2 ES-Madrid  | 3 | 1 | 2        | 0        |  |
| 6  | 1 ES | 2020-12 | 2 ES-Madrid  | 3 | 5 | 2        | 0        |  |
| 7  | 1 ES | 2020-12 | 2 ES-Northea | 1 | 1 | 2.21397  | #####    |  |
| 8  | 1 ES | 2020-12 | 2 ES-Northea | 1 | 2 | 4        | 0        |  |
| 9  | 1 ES | 2020-12 | 2 ES-Northea | 1 | 3 | 2.5      | #####    |  |
| 10 | 1 ES | 2020-12 | 2 ES-Northea | 1 | 4 | #####    | #####    |  |
| 11 | 1 ES | 2020-12 | 2 ES-Northea | 1 | 5 | 2.145155 | #####    |  |
| 12 | 1 ES | 2020-12 | 2 ES-Northea | 2 | 1 | 1.968058 | #####    |  |
| 13 | 1 ES | 2020-12 | 2 ES-Northea | 2 | 3 | 2.5      | #####    |  |
| 14 | 1 ES | 2020-12 | 2 ES-Northea | 2 | 4 | 1        | #####    |  |
| 15 | 1 ES | 2020-12 | 2 ES-Northea | 2 | 5 | 3        | 0        |  |
| 16 | 1 ES | 2020-12 | 2 ES-Northea | 3 | 1 | 2.384201 | #####    |  |
| 17 | 1 ES | 2020-12 | 2 ES-Northea | 3 | 2 | 4        | 0        |  |
| 18 | 1 ES | 2020-12 | 2 ES-Northea | 3 | 4 | #####    | #####    |  |
| 19 | 1 ES | 2020-12 | 2 ES-Northea | 3 | 5 | 1        | 0        |  |
| 20 | 1 ES | 2020-12 | 2 ES-Northea | 3 | 5 | 1        | 0        |  |
| 21 | 1 ES | 2020-12 | 2 ES-Northw  | 1 | 1 | 3.245139 | #####    |  |
| 22 | 1 ES | 2020-12 | 2 ES-Northw  | 1 | 2 | 2        | 0        |  |
| 23 | 1 ES | 2020-12 | 2 ES-Northw  | 1 | 3 | 2.634917 | #####    |  |
| 24 | 1 ES | 2020-12 | 2 ES-Northw  | 1 | 4 | 2.255494 | #####    |  |
| 25 | 1 ES | 2020-12 | 2 ES-Northw  | 1 | 5 | 6        | 0        |  |
| 26 | 1 ES | 2020-12 | 2 ES-Northw  | 2 | 1 | 3.057933 | #####    |  |
| 27 | 1 ES | 2020-12 | 2 ES-Northw  | 2 | 2 | 2        | 0        |  |
| 28 | 1 ES | 2020-12 | 2 ES-Northw  | 2 | 3 | 2.285714 | #####    |  |
| 29 | 1 ES | 2020-12 | 2 ES-Northw  | 2 | 4 | 2        | #####    |  |
| 30 | 1 ES | 2020-12 | 2 ES-Northw  | 2 | 5 | 6        | 0        |  |
| 31 | 1 ES | 2020-12 | 2 ES-Northw  | 3 | 1 | 3.494285 | #####    |  |
| 32 | 1 ES | 2020-12 | 2 ES-Northw  | 3 | 3 | 3        | #####    |  |
| 33 | 1 ES | 2020-12 | 2 ES-Northw  | 3 | 4 | 2.5      | #####    |  |
| 34 | 1 ES | 2020-12 | 2 ES-Northw  | 3 | 5 | 6        | 0        |  |
| 35 | 1 ES | 2020-12 | 2 ES-Overall | 1 | 1 | 2.2693   | #####    |  |
| 36 | 1 ES | 2020-12 | 2 ES-Overall | 1 | 2 | 2.118562 | #####    |  |
| 37 | 1 ES | 2020-12 | 2 ES-Overall | 1 | 3 | 2.413193 | #####    |  |
| 38 | 1 ES | 2020-12 | 2 ES-Overall | 1 | 4 | 2.200023 | #####    |  |
| 39 | 1 ES | 2020-12 | 2 ES-Overall | 1 | 5 | 2.629275 | #####    |  |
| 40 | 1 ES | 2020-12 | 2 ES-Overall | 2 | 1 | 2.219045 | #####    |  |
| 41 | 1 ES | 2020-12 | 2 ES-Overall | 2 | 2 | 2.221583 | #####    |  |
| 42 | 1 ES | 2020-12 | 2 ES-Overall | 2 | 3 | 2.283066 | #####    |  |
| 43 | 1 ES | 2020-12 | 2 ES-Overall | 2 | 4 | 1.859193 | #####    |  |
| 44 | 1 ES | 2020-12 | 2 ES-Overall | 2 | 5 | 2.806036 | #####    |  |
| 45 | 1 ES | 2020-12 | 2 ES-Overall | 3 | 1 | 2.33272  | #####    |  |
| 46 | 1 ES | 2020-12 | 2 ES-Overall | 3 | 2 | 2.008417 | #####    |  |
| 47 | 1 ES | 2020-12 | 2 ES-Overall | 3 | 3 | 2.64004  | #####    |  |
| 48 | 1 ES | 2020-12 | 2 ES-Overall | 3 | 4 | 2.600175 | #####    |  |
| 49 | 1 ES | 2020-12 | 2 ES-Overall | 3 | 5 | 2.389798 | #####    |  |
| 50 | 1 ES | 2020-12 | 2 ES-South   | 1 | 1 | 2.196457 | #####    |  |
| 51 | 1 ES | 2020-12 | 2 ES-South   | 1 | 2 | 1.55294  | #####    |  |
| 52 | 1 ES | 2020-12 | 2 ES-South   | 1 | 3 | 2.75     | #####    |  |
| 53 | 1 ES | 2020-12 | 2 ES-South   | 1 | 4 | 3.775885 | #####    |  |
| 54 | 1 ES | 2020-12 | 2 ES-South   | 2 | 1 | 2.733471 | #####    |  |
| 55 | 1 ES | 2020-12 | 2 ES-South   | 2 | 2 | 3        | 1.000093 |  |
| 56 | 1 ES | 2020-12 | 2 ES-South   | 2 | 3 | 2.75     | #####    |  |
| 57 | 1 ES | 2020-12 | 2 ES-South   | 2 | 4 | 1.5      | 1.060759 |  |
| 58 | 1 ES | 2020-12 | 2 ES-South   | 3 | 1 | 1.534453 | 1.320646 |  |
| 59 | 1 ES | 2020-12 | 2 ES-South   | 3 | 2 | 0        | 0        |  |
| 60 | 1 ES | 2020-12 | 2 ES-South   | 3 | 2 | 0        | 0        |  |

1  
2  
3  
4  
5  
6  
7  
8  
9  
10  
11  
12  
13  
14  
15  
16  
17  
18  
19  
20  
21  
22  
23  
24  
25  
26  
27  
28  
29  
30  
31  
32  
33  
34  
35  
36  
37  
38  
39  
40  
41  
42  
43  
44  
45  
46  
47  
48  
49  
50  
51  
52  
53  
54  
55  
56  
57  
58  
59  
60

|      |         |              |   |   |       |       |   |
|------|---------|--------------|---|---|-------|-------|---|
| 1 ES | 2020-12 | 2 ES-South   | 3 | 4 | 5     | ##### |   |
| 1 ES | 2020-12 | 3 ES-Center  | 1 | 1 | 0     |       | 0 |
| 1 ES | 2020-12 | 3 ES-Center  | 1 | 2 | 0     |       | 0 |
| 1 ES | 2020-12 | 3 ES-Center  | 1 | 3 | 0     |       | 0 |
| 1 ES | 2020-12 | 3 ES-Center  | 1 | 4 | 0     |       | 0 |
| 1 ES | 2020-12 | 3 ES-Center  | 2 | 1 | 0     |       | 0 |
| 1 ES | 2020-12 | 3 ES-Center  | 2 | 3 | 0     |       | 0 |
| 1 ES | 2020-12 | 3 ES-Center  | 2 | 4 | 0     |       | 0 |
| 1 ES | 2020-12 | 3 ES-Center  | 3 | 1 | 0     |       | 0 |
| 1 ES | 2020-12 | 3 ES-Center  | 3 | 2 | 0     |       | 0 |
| 1 ES | 2020-12 | 3 ES-Center  | 3 | 4 | 0     |       | 0 |
| 1 ES | 2020-12 | 3 ES-East    | 1 | 1 | ##### | ##### |   |
| 1 ES | 2020-12 | 3 ES-East    | 1 | 2 | 0     |       | 0 |
| 1 ES | 2020-12 | 3 ES-East    | 1 | 3 | ##### | ##### |   |
| 1 ES | 2020-12 | 3 ES-East    | 1 | 4 | 0     |       | 0 |
| 1 ES | 2020-12 | 3 ES-East    | 1 | 5 | 0     |       | 0 |
| 1 ES | 2020-12 | 3 ES-East    | 2 | 1 | 0     |       | 0 |
| 1 ES | 2020-12 | 3 ES-East    | 2 | 2 | 0     |       | 0 |
| 1 ES | 2020-12 | 3 ES-East    | 2 | 3 | 0     |       | 0 |
| 1 ES | 2020-12 | 3 ES-East    | 2 | 4 | 0     |       | 0 |
| 1 ES | 2020-12 | 3 ES-East    | 2 | 5 | 0     |       | 0 |
| 1 ES | 2020-12 | 3 ES-East    | 3 | 1 | ##### | ##### |   |
| 1 ES | 2020-12 | 3 ES-East    | 3 | 3 | 1     | ##### |   |
| 1 ES | 2020-12 | 3 ES-East    | 3 | 4 | 0     |       | 0 |
| 1 ES | 2020-12 | 3 ES-Island  | 1 | 1 | 0     |       | 0 |
| 1 ES | 2020-12 | 3 ES-Island  | 1 | 3 | 0     |       | 0 |
| 1 ES | 2020-12 | 3 ES-Island  | 1 | 4 | 0     |       | 0 |
| 1 ES | 2020-12 | 3 ES-Island  | 1 | 5 | 0     |       | 0 |
| 1 ES | 2020-12 | 3 ES-Island  | 2 | 1 | 0     |       | 0 |
| 1 ES | 2020-12 | 3 ES-Island  | 2 | 3 | 0     |       | 0 |
| 1 ES | 2020-12 | 3 ES-Island  | 2 | 4 | 0     |       | 0 |
| 1 ES | 2020-12 | 3 ES-Island  | 2 | 5 | 0     |       | 0 |
| 1 ES | 2020-12 | 3 ES-Island  | 3 | 1 | 0     |       | 0 |
| 1 ES | 2020-12 | 3 ES-Island  | 3 | 4 | 0     |       | 0 |
| 1 ES | 2020-12 | 3 ES-Island  | 3 | 5 | 0     |       | 0 |
| 1 ES | 2020-12 | 3 ES-Madrid  | 1 | 1 | 0     |       | 0 |
| 1 ES | 2020-12 | 3 ES-Madrid  | 1 | 2 | 0     |       | 0 |
| 1 ES | 2020-12 | 3 ES-Madrid  | 1 | 3 | 0     |       | 0 |
| 1 ES | 2020-12 | 3 ES-Madrid  | 1 | 4 | 0     |       | 0 |
| 1 ES | 2020-12 | 3 ES-Madrid  | 1 | 5 | 0     |       | 0 |
| 1 ES | 2020-12 | 3 ES-Madrid  | 2 | 1 | 0     |       | 0 |
| 1 ES | 2020-12 | 3 ES-Madrid  | 2 | 2 | 0     |       | 0 |
| 1 ES | 2020-12 | 3 ES-Madrid  | 2 | 3 | 0     |       | 0 |
| 1 ES | 2020-12 | 3 ES-Madrid  | 2 | 4 | 0     |       | 0 |
| 1 ES | 2020-12 | 3 ES-Madrid  | 3 | 1 | 0     |       | 0 |
| 1 ES | 2020-12 | 3 ES-Madrid  | 3 | 5 | 0     |       | 0 |
| 1 ES | 2020-12 | 3 ES-Northea | 1 | 1 | ##### | ##### |   |
| 1 ES | 2020-12 | 3 ES-Northea | 1 | 2 | 0     |       | 0 |
| 1 ES | 2020-12 | 3 ES-Northea | 1 | 3 | 1     | ##### |   |
| 1 ES | 2020-12 | 3 ES-Northea | 1 | 4 | 0     |       | 0 |
| 1 ES | 2020-12 | 3 ES-Northea | 1 | 5 | 0     |       | 0 |
| 1 ES | 2020-12 | 3 ES-Northea | 2 | 1 | ##### | ##### |   |
| 1 ES | 2020-12 | 3 ES-Northea | 2 | 3 | 1     | ##### |   |
| 1 ES | 2020-12 | 3 ES-Northea | 2 | 4 | 0     |       | 0 |
| 1 ES | 2020-12 | 3 ES-Northea | 2 | 5 | 0     |       | 0 |
| 1 ES | 2020-12 | 3 ES-Northea | 3 | 1 | 0     |       | 0 |



|    |      |         |              |   |   |          |          |  |
|----|------|---------|--------------|---|---|----------|----------|--|
| 1  |      |         |              |   |   |          |          |  |
| 2  |      |         |              |   |   |          |          |  |
| 3  | 1 ES | 2020-12 | 3 ES-Northea | 3 | 2 | 0        | 0        |  |
| 4  | 1 ES | 2020-12 | 3 ES-Northea | 3 | 4 | 0        | 0        |  |
| 5  | 1 ES | 2020-12 | 3 ES-Northea | 3 | 5 | 0        | 0        |  |
| 6  | 1 ES | 2020-12 | 3 ES-Northw  | 1 | 1 | 0        | 0        |  |
| 7  | 1 ES | 2020-12 | 3 ES-Northw  | 1 | 2 | 0        | 0        |  |
| 8  | 1 ES | 2020-12 | 3 ES-Northw  | 1 | 3 | 0        | 0        |  |
| 9  | 1 ES | 2020-12 | 3 ES-Northw  | 1 | 4 | 0        | 0        |  |
| 10 | 1 ES | 2020-12 | 3 ES-Northw  | 1 | 5 | 0        | 0        |  |
| 11 | 1 ES | 2020-12 | 3 ES-Northw  | 2 | 1 | 0        | 0        |  |
| 12 | 1 ES | 2020-12 | 3 ES-Northw  | 2 | 2 | 0        | 0        |  |
| 13 | 1 ES | 2020-12 | 3 ES-Northw  | 2 | 3 | 0        | 0        |  |
| 14 | 1 ES | 2020-12 | 3 ES-Northw  | 2 | 4 | 0        | 0        |  |
| 15 | 1 ES | 2020-12 | 3 ES-Northw  | 2 | 5 | 0        | 0        |  |
| 16 | 1 ES | 2020-12 | 3 ES-Northw  | 3 | 1 | 0        | 0        |  |
| 17 | 1 ES | 2020-12 | 3 ES-Northw  | 3 | 3 | 0        | 0        |  |
| 18 | 1 ES | 2020-12 | 3 ES-Northw  | 3 | 4 | 0        | 0        |  |
| 19 | 1 ES | 2020-12 | 3 ES-Northw  | 3 | 5 | 0        | 0        |  |
| 20 | 1 ES | 2020-12 | 3 ES-Northw  | 3 | 5 | 0        | 0        |  |
| 21 | 1 ES | 2020-12 | 3 ES-Overall | 1 | 1 | #####    | #####    |  |
| 22 | 1 ES | 2020-12 | 3 ES-Overall | 1 | 2 | 0        | 0        |  |
| 23 | 1 ES | 2020-12 | 3 ES-Overall | 1 | 3 | #####    | #####    |  |
| 24 | 1 ES | 2020-12 | 3 ES-Overall | 1 | 4 | 0        | 0        |  |
| 25 | 1 ES | 2020-12 | 3 ES-Overall | 1 | 5 | 0        | 0        |  |
| 26 | 1 ES | 2020-12 | 3 ES-Overall | 2 | 1 | #####    | #####    |  |
| 27 | 1 ES | 2020-12 | 3 ES-Overall | 2 | 2 | 0        | 0        |  |
| 28 | 1 ES | 2020-12 | 3 ES-Overall | 2 | 3 | #####    | #####    |  |
| 29 | 1 ES | 2020-12 | 3 ES-Overall | 2 | 4 | 0        | 0        |  |
| 30 | 1 ES | 2020-12 | 3 ES-Overall | 2 | 5 | 0        | 0        |  |
| 31 | 1 ES | 2020-12 | 3 ES-Overall | 3 | 1 | #####    | #####    |  |
| 32 | 1 ES | 2020-12 | 3 ES-Overall | 3 | 2 | 0        | 0        |  |
| 33 | 1 ES | 2020-12 | 3 ES-Overall | 3 | 3 | #####    | #####    |  |
| 34 | 1 ES | 2020-12 | 3 ES-Overall | 3 | 4 | 0        | 0        |  |
| 35 | 1 ES | 2020-12 | 3 ES-Overall | 3 | 5 | 0        | 0        |  |
| 36 | 1 ES | 2020-12 | 3 ES-South   | 1 | 1 | 0        | 0        |  |
| 37 | 1 ES | 2020-12 | 3 ES-South   | 1 | 2 | 0        | 0        |  |
| 38 | 1 ES | 2020-12 | 3 ES-South   | 1 | 3 | 0        | 0        |  |
| 39 | 1 ES | 2020-12 | 3 ES-South   | 1 | 4 | 0        | 0        |  |
| 40 | 1 ES | 2020-12 | 3 ES-South   | 2 | 1 | 0        | 0        |  |
| 41 | 1 ES | 2020-12 | 3 ES-South   | 2 | 2 | 0        | 0        |  |
| 42 | 1 ES | 2020-12 | 3 ES-South   | 2 | 3 | 0        | 0        |  |
| 43 | 1 ES | 2020-12 | 3 ES-South   | 2 | 4 | 0        | 0        |  |
| 44 | 1 ES | 2020-12 | 3 ES-South   | 3 | 1 | 0        | 0        |  |
| 45 | 1 ES | 2020-12 | 3 ES-South   | 3 | 2 | 0        | 0        |  |
| 46 | 1 ES | 2020-12 | 3 ES-South   | 3 | 4 | 0        | 0        |  |
| 47 | 1 ES | 2020-12 | 4 ES-Center  | 1 | 1 | #####    | #####    |  |
| 48 | 1 ES | 2020-12 | 4 ES-Center  | 1 | 2 | 0        | 0        |  |
| 49 | 1 ES | 2020-12 | 4 ES-Center  | 1 | 3 | 6.666667 | 5.443818 |  |
| 50 | 1 ES | 2020-12 | 4 ES-Center  | 1 | 4 | 0        | 0        |  |
| 51 | 1 ES | 2020-12 | 4 ES-Center  | 2 | 1 | 2.631486 | 2.469311 |  |
| 52 | 1 ES | 2020-12 | 4 ES-Center  | 2 | 3 | 6.666667 | 5.443818 |  |
| 53 | 1 ES | 2020-12 | 4 ES-Center  | 2 | 4 | 0        | 0        |  |
| 54 | 1 ES | 2020-12 | 4 ES-Center  | 3 | 1 | 0        | 0        |  |
| 55 | 1 ES | 2020-12 | 4 ES-Center  | 3 | 2 | 0        | 0        |  |
| 56 | 1 ES | 2020-12 | 4 ES-Center  | 3 | 4 | 0        | 0        |  |
| 57 | 1 ES | 2020-12 | 4 ES-Center  | 3 | 4 | 0        | 0        |  |
| 58 | 1 ES | 2020-12 | 4 ES-East    | 1 | 1 | #####    | #####    |  |
| 59 | 1 ES | 2020-12 | 4 ES-East    | 1 | 2 | 0        | 0        |  |
| 60 | 1 ES | 2020-12 | 4 ES-East    | 1 | 3 | #####    | #####    |  |

1  
2  
3  
4  
5  
6  
7  
8  
9  
10  
11  
12  
13  
14  
15  
16  
17  
18  
19  
20  
21  
22  
23  
24  
25  
26  
27  
28  
29  
30  
31  
32  
33  
34  
35  
36  
37  
38  
39  
40  
41  
42  
43  
44  
45  
46  
47  
48  
49  
50  
51  
52  
53  
54  
55  
56  
57  
58  
59  
60

|      |         |              |   |   |          |          |
|------|---------|--------------|---|---|----------|----------|
| 1 ES | 2020-12 | 4 ES-East    | 1 | 4 | #####    | #####    |
| 1 ES | 2020-12 | 4 ES-East    | 1 | 5 | 0        | 0        |
| 1 ES | 2020-12 | 4 ES-East    | 2 | 1 | 0        | 0        |
| 1 ES | 2020-12 | 4 ES-East    | 2 | 2 | 0        | 0        |
| 1 ES | 2020-12 | 4 ES-East    | 2 | 3 | 0        | 0        |
| 1 ES | 2020-12 | 4 ES-East    | 2 | 4 | 0        | 0        |
| 1 ES | 2020-12 | 4 ES-East    | 2 | 5 | 0        | 0        |
| 1 ES | 2020-12 | 4 ES-East    | 3 | 1 | 1.443781 | #####    |
| 1 ES | 2020-12 | 4 ES-East    | 3 | 3 | 1        | #####    |
| 1 ES | 2020-12 | 4 ES-East    | 3 | 4 | 2.5      | 1.767932 |
| 1 ES | 2020-12 | 4 ES-Island  | 1 | 1 | 1.214536 | 1.082406 |
| 1 ES | 2020-12 | 4 ES-Island  | 1 | 3 | 3.75     | 3.247898 |
| 1 ES | 2020-12 | 4 ES-Island  | 1 | 4 | 0        | 0        |
| 1 ES | 2020-12 | 4 ES-Island  | 1 | 5 | #####    | #####    |
| 1 ES | 2020-12 | 4 ES-Island  | 2 | 1 | 1.773931 | 1.538226 |
| 1 ES | 2020-12 | 4 ES-Island  | 2 | 3 | 3.75     | 3.247898 |
| 1 ES | 2020-12 | 4 ES-Island  | 2 | 4 | 0        | 0        |
| 1 ES | 2020-12 | 4 ES-Island  | 2 | 5 | #####    | #####    |
| 1 ES | 2020-12 | 4 ES-Island  | 3 | 1 | 0        | 0        |
| 1 ES | 2020-12 | 4 ES-Island  | 3 | 4 | 0        | 0        |
| 1 ES | 2020-12 | 4 ES-Island  | 3 | 5 | 0        | 0        |
| 1 ES | 2020-12 | 4 ES-Madrid  | 1 | 1 | 0        | 0        |
| 1 ES | 2020-12 | 4 ES-Madrid  | 1 | 2 | 0        | 0        |
| 1 ES | 2020-12 | 4 ES-Madrid  | 1 | 3 | 0        | 0        |
| 1 ES | 2020-12 | 4 ES-Madrid  | 1 | 4 | 0        | 0        |
| 1 ES | 2020-12 | 4 ES-Madrid  | 1 | 5 | 0        | 0        |
| 1 ES | 2020-12 | 4 ES-Madrid  | 2 | 1 | 0        | 0        |
| 1 ES | 2020-12 | 4 ES-Madrid  | 2 | 2 | 0        | 0        |
| 1 ES | 2020-12 | 4 ES-Madrid  | 2 | 3 | 0        | 0        |
| 1 ES | 2020-12 | 4 ES-Madrid  | 2 | 4 | 0        | 0        |
| 1 ES | 2020-12 | 4 ES-Madrid  | 3 | 1 | 0        | 0        |
| 1 ES | 2020-12 | 4 ES-Madrid  | 3 | 5 | 0        | 0        |
| 1 ES | 2020-12 | 4 ES-Northea | 1 | 1 | #####    | #####    |
| 1 ES | 2020-12 | 4 ES-Northea | 1 | 2 | 0        | 0        |
| 1 ES | 2020-12 | 4 ES-Northea | 1 | 3 | 0.5      | #####    |
| 1 ES | 2020-12 | 4 ES-Northea | 1 | 4 | 1.015793 | #####    |
| 1 ES | 2020-12 | 4 ES-Northea | 1 | 5 | 0        | 0        |
| 1 ES | 2020-12 | 4 ES-Northea | 2 | 1 | 1.031942 | #####    |
| 1 ES | 2020-12 | 4 ES-Northea | 2 | 3 | 0.5      | #####    |
| 1 ES | 2020-12 | 4 ES-Northea | 2 | 4 | 2        | 1.789021 |
| 1 ES | 2020-12 | 4 ES-Northea | 2 | 5 | 0        | 0        |
| 1 ES | 2020-12 | 4 ES-Northea | 3 | 1 | 0        | 0        |
| 1 ES | 2020-12 | 4 ES-Northea | 3 | 2 | 0        | 0        |
| 1 ES | 2020-12 | 4 ES-Northea | 3 | 4 | 0        | 0        |
| 1 ES | 2020-12 | 4 ES-Northea | 3 | 5 | 0        | 0        |
| 1 ES | 2020-12 | 4 ES-Northw  | 1 | 1 | #####    | #####    |
| 1 ES | 2020-12 | 4 ES-Northw  | 1 | 2 | 0        | 0        |
| 1 ES | 2020-12 | 4 ES-Northw  | 1 | 3 | #####    | #####    |
| 1 ES | 2020-12 | 4 ES-Northw  | 1 | 4 | 2.811816 | 2.734856 |
| 1 ES | 2020-12 | 4 ES-Northw  | 1 | 5 | 0        | 0        |
| 1 ES | 2020-12 | 4 ES-Northw  | 2 | 1 | 1.681286 | 1.419853 |
| 1 ES | 2020-12 | 4 ES-Northw  | 2 | 2 | 0        | 0        |
| 1 ES | 2020-12 | 4 ES-Northw  | 2 | 3 | #####    | #####    |
| 1 ES | 2020-12 | 4 ES-Northw  | 2 | 4 | 5.75     | 4.980111 |
| 1 ES | 2020-12 | 4 ES-Northw  | 2 | 5 | 0        | 0        |
| 1 ES | 2020-12 | 4 ES-Northw  | 3 | 1 | 0        | 0        |

|    |      |         |              |   |   |          |          |  |
|----|------|---------|--------------|---|---|----------|----------|--|
| 1  |      |         |              |   |   |          |          |  |
| 2  |      |         |              |   |   |          |          |  |
| 3  | 1 ES | 2020-12 | 4 ES-Northw  | 3 | 3 | 0        | 0        |  |
| 4  | 1 ES | 2020-12 | 4 ES-Northw  | 3 | 4 | 0        | 0        |  |
| 5  | 1 ES | 2020-12 | 4 ES-Northw  | 3 | 5 | 0        | 0        |  |
| 6  | 1 ES | 2020-12 | 4 ES-Overall | 1 | 1 | #####    | #####    |  |
| 7  | 1 ES | 2020-12 | 4 ES-Overall | 1 | 2 | 0        | 0        |  |
| 8  | 1 ES | 2020-12 | 4 ES-Overall | 1 | 3 | 1.635623 | #####    |  |
| 9  | 1 ES | 2020-12 | 4 ES-Overall | 1 | 4 | #####    | #####    |  |
| 10 | 1 ES | 2020-12 | 4 ES-Overall | 1 | 5 | #####    | #####    |  |
| 11 | 1 ES | 2020-12 | 4 ES-Overall | 2 | 1 | #####    | #####    |  |
| 12 | 1 ES | 2020-12 | 4 ES-Overall | 2 | 2 | 0        | 0        |  |
| 13 | 1 ES | 2020-12 | 4 ES-Overall | 2 | 3 | 2.214139 | #####    |  |
| 14 | 1 ES | 2020-12 | 4 ES-Overall | 2 | 4 | 1.037092 | #####    |  |
| 15 | 1 ES | 2020-12 | 4 ES-Overall | 2 | 5 | #####    | #####    |  |
| 16 | 1 ES | 2020-12 | 4 ES-Overall | 3 | 1 | #####    | #####    |  |
| 17 | 1 ES | 2020-12 | 4 ES-Overall | 3 | 2 | 0        | 0        |  |
| 18 | 1 ES | 2020-12 | 4 ES-Overall | 3 | 3 | #####    | #####    |  |
| 19 | 1 ES | 2020-12 | 4 ES-Overall | 3 | 4 | #####    | #####    |  |
| 20 | 1 ES | 2020-12 | 4 ES-Overall | 3 | 5 | 0        | 0        |  |
| 21 | 1 ES | 2020-12 | 4 ES-South   | 1 | 1 | #####    | #####    |  |
| 22 | 1 ES | 2020-12 | 4 ES-South   | 1 | 2 | 0        | 0        |  |
| 23 | 1 ES | 2020-12 | 4 ES-South   | 1 | 3 | 3.75     | 1.948739 |  |
| 24 | 1 ES | 2020-12 | 4 ES-South   | 1 | 4 | #####    | #####    |  |
| 25 | 1 ES | 2020-12 | 4 ES-South   | 2 | 1 | #####    | #####    |  |
| 26 | 1 ES | 2020-12 | 4 ES-South   | 2 | 2 | 0        | 0        |  |
| 27 | 1 ES | 2020-12 | 4 ES-South   | 2 | 3 | 3.75     | 1.948739 |  |
| 28 | 1 ES | 2020-12 | 4 ES-South   | 2 | 4 | 0        | 0        |  |
| 29 | 1 ES | 2020-12 | 4 ES-South   | 3 | 1 | #####    | #####    |  |
| 30 | 1 ES | 2020-12 | 4 ES-South   | 3 | 2 | 0        | 0        |  |
| 31 | 1 ES | 2020-12 | 4 ES-South   | 3 | 4 | 1.5      | 1.060759 |  |
| 32 | 1 ES | 2020-12 | 5 ES-Center  | 1 | 1 | 1.178743 | #####    |  |
| 33 | 1 ES | 2020-12 | 5 ES-Center  | 1 | 2 | 1.333333 | #####    |  |
| 34 | 1 ES | 2020-12 | 5 ES-Center  | 1 | 3 | 2.5      | 1.767932 |  |
| 35 | 1 ES | 2020-12 | 5 ES-Center  | 1 | 4 | #####    | #####    |  |
| 36 | 1 ES | 2020-12 | 5 ES-Center  | 2 | 1 | 1.280281 | #####    |  |
| 37 | 1 ES | 2020-12 | 5 ES-Center  | 2 | 3 | 2.5      | 1.767932 |  |
| 38 | 1 ES | 2020-12 | 5 ES-Center  | 2 | 4 | 0.75     | #####    |  |
| 39 | 1 ES | 2020-12 | 5 ES-Center  | 3 | 1 | 1.14817  | #####    |  |
| 40 | 1 ES | 2020-12 | 5 ES-Center  | 3 | 2 | 1.333333 | #####    |  |
| 41 | 1 ES | 2020-12 | 5 ES-Center  | 3 | 4 | 0        | 0        |  |
| 42 | 1 ES | 2020-12 | 5 ES-East    | 1 | 1 | #####    | #####    |  |
| 43 | 1 ES | 2020-12 | 5 ES-East    | 1 | 2 | #####    | #####    |  |
| 44 | 1 ES | 2020-12 | 5 ES-East    | 1 | 3 | 2.128905 | 1.016342 |  |
| 45 | 1 ES | 2020-12 | 5 ES-East    | 1 | 4 | #####    | #####    |  |
| 46 | 1 ES | 2020-12 | 5 ES-East    | 1 | 5 | 0        | 0        |  |
| 47 | 1 ES | 2020-12 | 5 ES-East    | 2 | 1 | #####    | #####    |  |
| 48 | 1 ES | 2020-12 | 5 ES-East    | 2 | 2 | #####    | #####    |  |
| 49 | 1 ES | 2020-12 | 5 ES-East    | 2 | 3 | 3.5      | 1.920466 |  |
| 50 | 1 ES | 2020-12 | 5 ES-East    | 2 | 4 | #####    | #####    |  |
| 51 | 1 ES | 2020-12 | 5 ES-East    | 2 | 5 | 0        | 0        |  |
| 52 | 1 ES | 2020-12 | 5 ES-East    | 3 | 1 | 1.204146 | #####    |  |
| 53 | 1 ES | 2020-12 | 5 ES-East    | 3 | 3 | 1.5      | 1.060759 |  |
| 54 | 1 ES | 2020-12 | 5 ES-East    | 3 | 4 | 0.5      | #####    |  |
| 55 | 1 ES | 2020-12 | 5 ES-Island  | 1 | 1 | #####    | #####    |  |
| 56 | 1 ES | 2020-12 | 5 ES-Island  | 1 | 3 | #####    | #####    |  |
| 57 | 1 ES | 2020-12 | 5 ES-Island  | 1 | 4 | 2.2919   | 1.084948 |  |
| 58 | 1 ES | 2020-12 | 5 ES-Island  | 1 | 5 | #####    | #####    |  |
| 59 | 1 ES | 2020-12 | 5 ES-Island  | 1 | 5 | #####    | #####    |  |
| 60 | 1 ES | 2020-12 | 5 ES-Island  | 1 | 5 | #####    | #####    |  |

1  
2  
3  
4  
5  
6  
7  
8  
9  
10  
11  
12  
13  
14  
15  
16  
17  
18  
19  
20  
21  
22  
23  
24  
25  
26  
27  
28  
29  
30  
31  
32  
33  
34  
35  
36  
37  
38  
39  
40  
41  
42  
43  
44  
45  
46  
47  
48  
49  
50  
51  
52  
53  
54  
55  
56  
57  
58  
59  
60

|      |         |              |   |   |          |          |
|------|---------|--------------|---|---|----------|----------|
| 1 ES | 2020-12 | 5 ES-Island  | 2 | 1 | #####    | #####    |
| 1 ES | 2020-12 | 5 ES-Island  | 2 | 3 | #####    | #####    |
| 1 ES | 2020-12 | 5 ES-Island  | 2 | 4 | 0.5      | #####    |
| 1 ES | 2020-12 | 5 ES-Island  | 2 | 5 | #####    | #####    |
| 1 ES | 2020-12 | 5 ES-Island  | 3 | 1 | 1.757028 | 1.012388 |
| 1 ES | 2020-12 | 5 ES-Island  | 3 | 4 | 4        | 0        |
| 1 ES | 2020-12 | 5 ES-Island  | 3 | 5 | 0.5      | #####    |
| 1 ES | 2020-12 | 5 ES-Madrid  | 1 | 1 | #####    | #####    |
| 1 ES | 2020-12 | 5 ES-Madrid  | 1 | 2 | 1.333333 | #####    |
| 1 ES | 2020-12 | 5 ES-Madrid  | 1 | 3 | 0        | 0        |
| 1 ES | 2020-12 | 5 ES-Madrid  | 1 | 4 | 0        | 0        |
| 1 ES | 2020-12 | 5 ES-Madrid  | 1 | 5 | 1        | 0        |
| 1 ES | 2020-12 | 5 ES-Madrid  | 2 | 1 | #####    | #####    |
| 1 ES | 2020-12 | 5 ES-Madrid  | 2 | 2 | 1.333333 | #####    |
| 1 ES | 2020-12 | 5 ES-Madrid  | 2 | 3 | 0        | 0        |
| 1 ES | 2020-12 | 5 ES-Madrid  | 2 | 4 | 0        | 0        |
| 1 ES | 2020-12 | 5 ES-Madrid  | 3 | 1 | 1        | 0        |
| 1 ES | 2020-12 | 5 ES-Madrid  | 3 | 5 | 1        | 0        |
| 1 ES | 2020-12 | 5 ES-Northea | 1 | 1 | #####    | #####    |
| 1 ES | 2020-12 | 5 ES-Northea | 1 | 2 | 2        | 0        |
| 1 ES | 2020-12 | 5 ES-Northea | 1 | 3 | 0        | 0        |
| 1 ES | 2020-12 | 5 ES-Northea | 1 | 4 | #####    | #####    |
| 1 ES | 2020-12 | 5 ES-Northea | 1 | 5 | 0        | 0        |
| 1 ES | 2020-12 | 5 ES-Northea | 2 | 1 | 0        | 0        |
| 1 ES | 2020-12 | 5 ES-Northea | 2 | 3 | 0        | 0        |
| 1 ES | 2020-12 | 5 ES-Northea | 2 | 4 | 0        | 0        |
| 1 ES | 2020-12 | 5 ES-Northea | 2 | 5 | 0        | 0        |
| 1 ES | 2020-12 | 5 ES-Northea | 3 | 1 | 1.099471 | #####    |
| 1 ES | 2020-12 | 5 ES-Northea | 3 | 2 | 2        | 0        |
| 1 ES | 2020-12 | 5 ES-Northea | 3 | 4 | #####    | #####    |
| 1 ES | 2020-12 | 5 ES-Northea | 3 | 5 | 0        | 0        |
| 1 ES | 2020-12 | 5 ES-Northw  | 1 | 1 | 2.427578 | 1.789019 |
| 1 ES | 2020-12 | 5 ES-Northw  | 1 | 2 | 0.5      | #####    |
| 1 ES | 2020-12 | 5 ES-Northw  | 1 | 3 | 5.034875 | 3.969812 |
| 1 ES | 2020-12 | 5 ES-Northw  | 1 | 4 | #####    | #####    |
| 1 ES | 2020-12 | 5 ES-Northw  | 1 | 5 | 1.407631 | #####    |
| 1 ES | 2020-12 | 5 ES-Northw  | 2 | 1 | #####    | #####    |
| 1 ES | 2020-12 | 5 ES-Northw  | 2 | 2 | 0.5      | #####    |
| 1 ES | 2020-12 | 5 ES-Northw  | 2 | 3 | #####    | #####    |
| 1 ES | 2020-12 | 5 ES-Northw  | 2 | 4 | 0.25     | #####    |
| 1 ES | 2020-12 | 5 ES-Northw  | 2 | 5 | 1        | 0        |
| 1 ES | 2020-12 | 5 ES-Northw  | 3 | 1 | 5.013989 | 3.85097  |
| 1 ES | 2020-12 | 5 ES-Northw  | 3 | 3 | 10       | 7.071728 |
| 1 ES | 2020-12 | 5 ES-Northw  | 3 | 4 | 0        | 0        |
| 1 ES | 2020-12 | 5 ES-Northw  | 3 | 5 | 2        | 0        |
| 1 ES | 2020-12 | 5 ES-Overall | 1 | 1 | #####    | #####    |
| 1 ES | 2020-12 | 5 ES-Overall | 1 | 2 | #####    | #####    |
| 1 ES | 2020-12 | 5 ES-Overall | 1 | 3 | 2.09021  | 1.042726 |
| 1 ES | 2020-12 | 5 ES-Overall | 1 | 4 | #####    | #####    |
| 1 ES | 2020-12 | 5 ES-Overall | 1 | 5 | #####    | #####    |
| 1 ES | 2020-12 | 5 ES-Overall | 2 | 1 | #####    | #####    |
| 1 ES | 2020-12 | 5 ES-Overall | 2 | 2 | #####    | #####    |
| 1 ES | 2020-12 | 5 ES-Overall | 2 | 3 | 1.030845 | #####    |
| 1 ES | 2020-12 | 5 ES-Overall | 2 | 4 | #####    | #####    |
| 1 ES | 2020-12 | 5 ES-Overall | 2 | 5 | #####    | #####    |
| 1 ES | 2020-12 | 5 ES-Overall | 3 | 1 | 1.43561  | #####    |

|    |      |         |              |   |   |          |          |  |
|----|------|---------|--------------|---|---|----------|----------|--|
| 1  |      |         |              |   |   |          |          |  |
| 2  |      |         |              |   |   |          |          |  |
| 3  | 1 ES | 2020-12 | 5 ES-Overall | 3 | 2 | 1.004209 | #####    |  |
| 4  | 1 ES | 2020-12 | 5 ES-Overall | 3 | 3 | 3.880687 | 2.728403 |  |
| 5  | 1 ES | 2020-12 | 5 ES-Overall | 3 | 4 | #####    | #####    |  |
| 6  | 1 ES | 2020-12 | 5 ES-Overall | 3 | 5 | #####    | #####    |  |
| 7  | 1 ES | 2020-12 | 5 ES-South   | 1 | 1 | #####    | #####    |  |
| 8  | 1 ES | 2020-12 | 5 ES-South   | 1 | 2 | #####    | #####    |  |
| 9  | 1 ES | 2020-12 | 5 ES-South   | 1 | 3 | 0        | 0        |  |
| 10 | 1 ES | 2020-12 | 5 ES-South   | 1 | 4 | #####    | #####    |  |
| 11 | 1 ES | 2020-12 | 5 ES-South   | 2 | 1 | #####    | #####    |  |
| 12 | 1 ES | 2020-12 | 5 ES-South   | 2 | 2 | 0.25     | #####    |  |
| 13 | 1 ES | 2020-12 | 5 ES-South   | 2 | 3 | 0        | 0        |  |
| 14 | 1 ES | 2020-12 | 5 ES-South   | 2 | 4 | 0        | 0        |  |
| 15 | 1 ES | 2020-12 | 5 ES-South   | 3 | 1 | #####    | #####    |  |
| 16 | 1 ES | 2020-12 | 5 ES-South   | 3 | 2 | 0        | 0        |  |
| 17 | 1 ES | 2020-12 | 5 ES-South   | 3 | 4 | 0.5      | #####    |  |
| 18 | 1 ES | 2020-13 | 1 ES-Center  | 1 | 1 | 3.084378 | #####    |  |
| 19 | 1 ES | 2020-13 | 1 ES-Center  | 1 | 2 | 5.276721 | 2.042162 |  |
| 20 | 1 ES | 2020-13 | 1 ES-Center  | 1 | 3 | 3.400477 | #####    |  |
| 21 | 1 ES | 2020-13 | 1 ES-Center  | 1 | 4 | 2.959962 | #####    |  |
| 22 | 1 ES | 2020-13 | 1 ES-Center  | 1 | 5 | 1.598394 | #####    |  |
| 23 | 1 ES | 2020-13 | 1 ES-Center  | 2 | 1 | 2.618774 | #####    |  |
| 24 | 1 ES | 2020-13 | 1 ES-Center  | 2 | 2 | 2.9      | #####    |  |
| 25 | 1 ES | 2020-13 | 1 ES-Center  | 2 | 3 | 3.416667 | #####    |  |
| 26 | 1 ES | 2020-13 | 1 ES-Center  | 2 | 4 | 2.095238 | #####    |  |
| 27 | 1 ES | 2020-13 | 1 ES-Center  | 2 | 5 | 1.714286 | #####    |  |
| 28 | 1 ES | 2020-13 | 1 ES-Center  | 3 | 1 | 3.645267 | #####    |  |
| 29 | 1 ES | 2020-13 | 1 ES-Center  | 3 | 2 | 7.333333 | 3.538482 |  |
| 30 | 1 ES | 2020-13 | 1 ES-Center  | 3 | 3 | 3.375    | 1.576027 |  |
| 31 | 1 ES | 2020-13 | 1 ES-Center  | 3 | 4 | 3.722222 | #####    |  |
| 32 | 1 ES | 2020-13 | 1 ES-Center  | 3 | 5 | 1.428571 | #####    |  |
| 33 | 1 ES | 2020-13 | 1 ES-East    | 1 | 1 | 2.965113 | #####    |  |
| 34 | 1 ES | 2020-13 | 1 ES-East    | 1 | 2 | 2.980412 | #####    |  |
| 35 | 1 ES | 2020-13 | 1 ES-East    | 1 | 3 | 3.178059 | #####    |  |
| 36 | 1 ES | 2020-13 | 1 ES-East    | 1 | 4 | 3.54602  | #####    |  |
| 37 | 1 ES | 2020-13 | 1 ES-East    | 1 | 5 | 1.786264 | #####    |  |
| 38 | 1 ES | 2020-13 | 1 ES-East    | 2 | 1 | 2.86969  | #####    |  |
| 39 | 1 ES | 2020-13 | 1 ES-East    | 2 | 2 | 3.8      | #####    |  |
| 40 | 1 ES | 2020-13 | 1 ES-East    | 2 | 3 | 3.025641 | #####    |  |
| 41 | 1 ES | 2020-13 | 1 ES-East    | 2 | 4 | 3.319149 | #####    |  |
| 42 | 1 ES | 2020-13 | 1 ES-East    | 2 | 5 | 1.583333 | #####    |  |
| 43 | 1 ES | 2020-13 | 1 ES-East    | 3 | 1 | 3.056673 | #####    |  |
| 44 | 1 ES | 2020-13 | 1 ES-East    | 3 | 2 | 2.333333 | #####    |  |
| 45 | 1 ES | 2020-13 | 1 ES-East    | 3 | 3 | 3.291667 | #####    |  |
| 46 | 1 ES | 2020-13 | 1 ES-East    | 3 | 4 | 3.809524 | #####    |  |
| 47 | 1 ES | 2020-13 | 1 ES-East    | 3 | 5 | 2.034483 | #####    |  |
| 48 | 1 ES | 2020-13 | 1 ES-Island  | 1 | 1 | 3.858187 | #####    |  |
| 49 | 1 ES | 2020-13 | 1 ES-Island  | 1 | 2 | 3.363636 | #####    |  |
| 50 | 1 ES | 2020-13 | 1 ES-Island  | 1 | 3 | 4.918521 | #####    |  |
| 51 | 1 ES | 2020-13 | 1 ES-Island  | 1 | 4 | 3.984532 | 1.062962 |  |
| 52 | 1 ES | 2020-13 | 1 ES-Island  | 1 | 5 | 1.735133 | #####    |  |
| 53 | 1 ES | 2020-13 | 1 ES-Island  | 2 | 1 | 3.822597 | #####    |  |
| 54 | 1 ES | 2020-13 | 1 ES-Island  | 2 | 2 | 3.363636 | #####    |  |
| 55 | 1 ES | 2020-13 | 1 ES-Island  | 2 | 3 | 5.21875  | #####    |  |
| 56 | 1 ES | 2020-13 | 1 ES-Island  | 2 | 4 | 3.071429 | #####    |  |
| 57 | 1 ES | 2020-13 | 1 ES-Island  | 2 | 5 | 1.777778 | #####    |  |
| 58 | 1 ES | 2020-13 | 1 ES-Island  | 3 | 1 | 3.912335 | #####    |  |
| 59 | 1 ES | 2020-13 | 1 ES-Island  | 3 |   |          |          |  |
| 60 | 1 ES | 2020-13 | 1 ES-Island  | 3 |   |          |          |  |

1  
2  
3  
4  
5  
6  
7  
8  
9  
10  
11  
12  
13  
14  
15  
16  
17  
18  
19  
20  
21  
22  
23  
24  
25  
26  
27  
28  
29  
30  
31  
32  
33  
34  
35  
36  
37  
38  
39  
40  
41  
42  
43  
44  
45  
46  
47  
48  
49  
50  
51  
52  
53  
54  
55  
56  
57  
58  
59  
60

|      |         |              |   |   |          |          |
|------|---------|--------------|---|---|----------|----------|
| 1 ES | 2020-13 | 1 ES-Island  | 3 | 3 | 4.428571 | 1.175662 |
| 1 ES | 2020-13 | 1 ES-Island  | 3 | 4 | 5        | 2.048225 |
| 1 ES | 2020-13 | 1 ES-Island  | 3 | 5 | 1.7      | #####    |
| 1 ES | 2020-13 | 1 ES-Madrid  | 1 | 1 | 3.359136 | #####    |
| 1 ES | 2020-13 | 1 ES-Madrid  | 1 | 2 | 3.294446 | #####    |
| 1 ES | 2020-13 | 1 ES-Madrid  | 1 | 3 | 3.475523 | #####    |
| 1 ES | 2020-13 | 1 ES-Madrid  | 1 | 4 | 3.921715 | #####    |
| 1 ES | 2020-13 | 1 ES-Madrid  | 1 | 5 | 2.277829 | #####    |
| 1 ES | 2020-13 | 1 ES-Madrid  | 2 | 1 | 3.068308 | #####    |
| 1 ES | 2020-13 | 1 ES-Madrid  | 2 | 2 | 3.8      | 1.046573 |
| 1 ES | 2020-13 | 1 ES-Madrid  | 2 | 3 | 2.814815 | #####    |
| 1 ES | 2020-13 | 1 ES-Madrid  | 2 | 4 | 3.136364 | #####    |
| 1 ES | 2020-13 | 1 ES-Madrid  | 2 | 5 | 2.727273 | #####    |
| 1 ES | 2020-13 | 1 ES-Madrid  | 3 | 1 | 3.534142 | #####    |
| 1 ES | 2020-13 | 1 ES-Madrid  | 3 | 2 | 3.090909 | #####    |
| 1 ES | 2020-13 | 1 ES-Madrid  | 3 | 3 | 3.958333 | #####    |
| 1 ES | 2020-13 | 1 ES-Madrid  | 3 | 4 | 4.258065 | #####    |
| 1 ES | 2020-13 | 1 ES-Madrid  | 3 | 5 | 1.7      | #####    |
| 1 ES | 2020-13 | 1 ES-Northea | 1 | 1 | 3.41302  | #####    |
| 1 ES | 2020-13 | 1 ES-Northea | 1 | 2 | 5.70333  | 2.188371 |
| 1 ES | 2020-13 | 1 ES-Northea | 1 | 3 | 3.667599 | #####    |
| 1 ES | 2020-13 | 1 ES-Northea | 1 | 4 | 3.223895 | #####    |
| 1 ES | 2020-13 | 1 ES-Northea | 1 | 5 | 2.161202 | #####    |
| 1 ES | 2020-13 | 1 ES-Northea | 2 | 1 | 3.247489 | #####    |
| 1 ES | 2020-13 | 1 ES-Northea | 2 | 2 | 5.375    | 2.423663 |
| 1 ES | 2020-13 | 1 ES-Northea | 2 | 3 | 2.756098 | #####    |
| 1 ES | 2020-13 | 1 ES-Northea | 2 | 4 | 3.666667 | #####    |
| 1 ES | 2020-13 | 1 ES-Northea | 2 | 5 | 2.125    | #####    |
| 1 ES | 2020-13 | 1 ES-Northea | 3 | 1 | 3.592835 | #####    |
| 1 ES | 2020-13 | 1 ES-Northea | 3 | 2 | 6        | 3.535864 |
| 1 ES | 2020-13 | 1 ES-Northea | 3 | 3 | 4.294118 | 1.423528 |
| 1 ES | 2020-13 | 1 ES-Northea | 3 | 4 | 2.352941 | #####    |
| 1 ES | 2020-13 | 1 ES-Northea | 3 | 5 | 2.2      | #####    |
| 1 ES | 2020-13 | 1 ES-Northw  | 1 | 1 | 3.395937 | #####    |
| 1 ES | 2020-13 | 1 ES-Northw  | 1 | 2 | 4.335324 | #####    |
| 1 ES | 2020-13 | 1 ES-Northw  | 1 | 3 | 4.128164 | #####    |
| 1 ES | 2020-13 | 1 ES-Northw  | 1 | 4 | 2.863173 | #####    |
| 1 ES | 2020-13 | 1 ES-Northw  | 1 | 5 | 2.503411 | #####    |
| 1 ES | 2020-13 | 1 ES-Northw  | 2 | 1 | 2.997014 | #####    |
| 1 ES | 2020-13 | 1 ES-Northw  | 2 | 2 | 2.454545 | #####    |
| 1 ES | 2020-13 | 1 ES-Northw  | 2 | 3 | 3.384615 | #####    |
| 1 ES | 2020-13 | 1 ES-Northw  | 2 | 4 | 3.5      | #####    |
| 1 ES | 2020-13 | 1 ES-Northw  | 2 | 5 | 2.333333 | #####    |
| 1 ES | 2020-13 | 1 ES-Northw  | 3 | 1 | 3.802358 | #####    |
| 1 ES | 2020-13 | 1 ES-Northw  | 3 | 2 | 6        | 1.414346 |
| 1 ES | 2020-13 | 1 ES-Northw  | 3 | 3 | 4.85     | 1.375401 |
| 1 ES | 2020-13 | 1 ES-Northw  | 3 | 4 | 2.4      | #####    |
| 1 ES | 2020-13 | 1 ES-Northw  | 3 | 5 | 2.8      | #####    |
| 1 ES | 2020-13 | 1 ES-Overall | 1 | 1 | 3.161006 | #####    |
| 1 ES | 2020-13 | 1 ES-Overall | 1 | 2 | 3.841525 | #####    |
| 1 ES | 2020-13 | 1 ES-Overall | 1 | 3 | 3.33157  | #####    |
| 1 ES | 2020-13 | 1 ES-Overall | 1 | 4 | 3.397737 | #####    |
| 1 ES | 2020-13 | 1 ES-Overall | 1 | 5 | 2.023423 | #####    |
| 1 ES | 2020-13 | 1 ES-Overall | 2 | 1 | 2.987414 | #####    |
| 1 ES | 2020-13 | 1 ES-Overall | 2 | 2 | 3.389152 | #####    |
| 1 ES | 2020-13 | 1 ES-Overall | 2 | 3 | 3.311668 | #####    |

|    |      |         |              |   |   |          |          |  |
|----|------|---------|--------------|---|---|----------|----------|--|
| 1  |      |         |              |   |   |          |          |  |
| 2  |      |         |              |   |   |          |          |  |
| 3  | 1 ES | 2020-13 | 1 ES-Overall | 2 | 4 | 3.160854 | #####    |  |
| 4  | 1 ES | 2020-13 | 1 ES-Overall | 2 | 5 | 2.027719 | #####    |  |
| 5  | 1 ES | 2020-13 | 1 ES-Overall | 3 | 1 | 3.323719 | #####    |  |
| 6  | 1 ES | 2020-13 | 1 ES-Overall | 3 | 2 | 4.221218 | #####    |  |
| 7  | 1 ES | 2020-13 | 1 ES-Overall | 3 | 3 | 3.349054 | #####    |  |
| 8  | 1 ES | 2020-13 | 1 ES-Overall | 3 | 4 | 3.617238 | #####    |  |
| 9  | 1 ES | 2020-13 | 1 ES-Overall | 3 | 5 | 2.018471 | #####    |  |
| 10 | 1 ES | 2020-13 | 1 ES-South   | 1 | 1 | 2.965578 | #####    |  |
| 11 | 1 ES | 2020-13 | 1 ES-South   | 1 | 2 | 4.28159  | #####    |  |
| 12 | 1 ES | 2020-13 | 1 ES-South   | 1 | 3 | 2.333079 | #####    |  |
| 13 | 1 ES | 2020-13 | 1 ES-South   | 1 | 4 | 3.378179 | #####    |  |
| 14 | 1 ES | 2020-13 | 1 ES-South   | 1 | 5 | 2.232063 | #####    |  |
| 15 | 1 ES | 2020-13 | 1 ES-South   | 2 | 1 | 2.959297 | #####    |  |
| 16 | 1 ES | 2020-13 | 1 ES-South   | 2 | 2 | 2.642857 | #####    |  |
| 17 | 1 ES | 2020-13 | 1 ES-South   | 2 | 3 | 3.352941 | #####    |  |
| 18 | 1 ES | 2020-13 | 1 ES-South   | 2 | 4 | 3.075472 | #####    |  |
| 19 | 1 ES | 2020-13 | 1 ES-South   | 2 | 5 | 2.466667 | #####    |  |
| 20 | 1 ES | 2020-13 | 1 ES-South   | 3 | 1 | 2.9708   | #####    |  |
| 21 | 1 ES | 2020-13 | 1 ES-South   | 3 | 2 | 6.333333 | 1.360955 |  |
| 22 | 1 ES | 2020-13 | 1 ES-South   | 3 | 3 | 1.533333 | #####    |  |
| 23 | 1 ES | 2020-13 | 1 ES-South   | 3 | 4 | 3.605263 | #####    |  |
| 24 | 1 ES | 2020-13 | 1 ES-South   | 3 | 5 | 2.047619 | #####    |  |
| 25 | 1 ES | 2020-13 | 2 ES-Center  | 1 | 1 | 1.725575 | #####    |  |
| 26 | 1 ES | 2020-13 | 2 ES-Center  | 1 | 2 | 2.405334 | #####    |  |
| 27 | 1 ES | 2020-13 | 2 ES-Center  | 1 | 3 | 1.724064 | #####    |  |
| 28 | 1 ES | 2020-13 | 2 ES-Center  | 1 | 4 | 1.610901 | #####    |  |
| 29 | 1 ES | 2020-13 | 2 ES-Center  | 1 | 5 | 1.482502 | #####    |  |
| 30 | 1 ES | 2020-13 | 2 ES-Center  | 2 | 1 | 1.753634 | #####    |  |
| 31 | 1 ES | 2020-13 | 2 ES-Center  | 2 | 2 | 2.272727 | #####    |  |
| 32 | 1 ES | 2020-13 | 2 ES-Center  | 2 | 3 | 1.934211 | #####    |  |
| 33 | 1 ES | 2020-13 | 2 ES-Center  | 2 | 4 | 1.309524 | #####    |  |
| 34 | 1 ES | 2020-13 | 2 ES-Center  | 2 | 5 | 1.714286 | #####    |  |
| 35 | 1 ES | 2020-13 | 2 ES-Center  | 3 | 1 | 1.693406 | #####    |  |
| 36 | 1 ES | 2020-13 | 2 ES-Center  | 3 | 2 | 2.5      | #####    |  |
| 37 | 1 ES | 2020-13 | 2 ES-Center  | 3 | 3 | 1.375    | #####    |  |
| 38 | 1 ES | 2020-13 | 2 ES-Center  | 3 | 4 | 1.85     | #####    |  |
| 39 | 1 ES | 2020-13 | 2 ES-Center  | 3 | 5 | 1.142857 | #####    |  |
| 40 | 1 ES | 2020-13 | 2 ES-East    | 1 | 1 | 1.652505 | #####    |  |
| 41 | 1 ES | 2020-13 | 2 ES-East    | 1 | 2 | 2.308309 | #####    |  |
| 42 | 1 ES | 2020-13 | 2 ES-East    | 1 | 3 | 1.792201 | #####    |  |
| 43 | 1 ES | 2020-13 | 2 ES-East    | 1 | 4 | 1.596106 | #####    |  |
| 44 | 1 ES | 2020-13 | 2 ES-East    | 1 | 5 | 1.01617  | #####    |  |
| 45 | 1 ES | 2020-13 | 2 ES-East    | 2 | 1 | 1.620877 | #####    |  |
| 46 | 1 ES | 2020-13 | 2 ES-East    | 2 | 2 | 2.65     | #####    |  |
| 47 | 1 ES | 2020-13 | 2 ES-East    | 2 | 3 | 1.848101 | #####    |  |
| 48 | 1 ES | 2020-13 | 2 ES-East    | 2 | 4 | 1.459184 | #####    |  |
| 49 | 1 ES | 2020-13 | 2 ES-East    | 2 | 5 | #####    | #####    |  |
| 50 | 1 ES | 2020-13 | 2 ES-East    | 3 | 1 | 1.683663 | #####    |  |
| 51 | 1 ES | 2020-13 | 2 ES-East    | 3 | 2 | 2        | #####    |  |
| 52 | 1 ES | 2020-13 | 2 ES-East    | 3 | 3 | 1.75     | #####    |  |
| 53 | 1 ES | 2020-13 | 2 ES-East    | 3 | 4 | 1.761905 | #####    |  |
| 54 | 1 ES | 2020-13 | 2 ES-East    | 3 | 5 | 1.166667 | #####    |  |
| 55 | 1 ES | 2020-13 | 2 ES-Island  | 1 | 1 | 2.003093 | #####    |  |
| 56 | 1 ES | 2020-13 | 2 ES-Island  | 1 | 2 | 2        | #####    |  |
| 57 | 1 ES | 2020-13 | 2 ES-Island  | 1 | 3 | 2.434108 | #####    |  |
| 58 | 1 ES | 2020-13 | 2 ES-Island  | 1 | 4 | 1.806319 | #####    |  |
| 59 | 1 ES | 2020-13 | 2 ES-Island  | 1 |   |          |          |  |
| 60 | 1 ES | 2020-13 | 2 ES-Island  | 1 |   |          |          |  |

1  
2  
3  
4  
5  
6  
7  
8  
9  
10  
11  
12  
13  
14  
15  
16  
17  
18  
19  
20  
21  
22  
23  
24  
25  
26  
27  
28  
29  
30  
31  
32  
33  
34  
35  
36  
37  
38  
39  
40  
41  
42  
43  
44  
45  
46  
47  
48  
49  
50  
51  
52  
53  
54  
55  
56  
57  
58  
59  
60

|      |         |              |   |   |          |       |
|------|---------|--------------|---|---|----------|-------|
| 1 ES | 2020-13 | 2 ES-Island  | 1 | 5 | 1.420076 | ##### |
| 1 ES | 2020-13 | 2 ES-Island  | 2 | 1 | 2.134692 | ##### |
| 1 ES | 2020-13 | 2 ES-Island  | 2 | 2 | 2        | ##### |
| 1 ES | 2020-13 | 2 ES-Island  | 2 | 3 | 2.4375   | ##### |
| 1 ES | 2020-13 | 2 ES-Island  | 2 | 4 | 2.133333 | ##### |
| 1 ES | 2020-13 | 2 ES-Island  | 2 | 5 | 1.444444 | ##### |
| 1 ES | 2020-13 | 2 ES-Island  | 3 | 1 | 1.799175 | ##### |
| 1 ES | 2020-13 | 2 ES-Island  | 3 | 3 | 2.428571 | ##### |
| 1 ES | 2020-13 | 2 ES-Island  | 3 | 4 | 1.416667 | ##### |
| 1 ES | 2020-13 | 2 ES-Island  | 3 | 5 | 1.4      | ##### |
| 1 ES | 2020-13 | 2 ES-Madrid  | 1 | 1 | 1.976381 | ##### |
| 1 ES | 2020-13 | 2 ES-Madrid  | 1 | 2 | 2.522839 | ##### |
| 1 ES | 2020-13 | 2 ES-Madrid  | 1 | 3 | 1.830823 | ##### |
| 1 ES | 2020-13 | 2 ES-Madrid  | 1 | 4 | 2.017137 | ##### |
| 1 ES | 2020-13 | 2 ES-Madrid  | 1 | 5 | 1.16079  | ##### |
| 1 ES | 2020-13 | 2 ES-Madrid  | 2 | 1 | 1.836178 | ##### |
| 1 ES | 2020-13 | 2 ES-Madrid  | 2 | 2 | 2.466667 | ##### |
| 1 ES | 2020-13 | 2 ES-Madrid  | 2 | 3 | 1.703704 | ##### |
| 1 ES | 2020-13 | 2 ES-Madrid  | 2 | 4 | 1.909091 | ##### |
| 1 ES | 2020-13 | 2 ES-Madrid  | 2 | 5 | 1.363636 | ##### |
| 1 ES | 2020-13 | 2 ES-Madrid  | 3 | 1 | 2.058304 | ##### |
| 1 ES | 2020-13 | 2 ES-Madrid  | 3 | 2 | 2.545455 | ##### |
| 1 ES | 2020-13 | 2 ES-Madrid  | 3 | 3 | 1.92     | ##### |
| 1 ES | 2020-13 | 2 ES-Madrid  | 3 | 4 | 2.060606 | ##### |
| 1 ES | 2020-13 | 2 ES-Madrid  | 3 | 5 | 0.9      | ##### |
| 1 ES | 2020-13 | 2 ES-Northea | 1 | 1 | 1.723011 | ##### |
| 1 ES | 2020-13 | 2 ES-Northea | 1 | 2 | 1.534006 | ##### |
| 1 ES | 2020-13 | 2 ES-Northea | 1 | 3 | 1.580071 | ##### |
| 1 ES | 2020-13 | 2 ES-Northea | 1 | 4 | 1.982083 | ##### |
| 1 ES | 2020-13 | 2 ES-Northea | 1 | 5 | 1.676687 | ##### |
| 1 ES | 2020-13 | 2 ES-Northea | 2 | 1 | 1.903756 | ##### |
| 1 ES | 2020-13 | 2 ES-Northea | 2 | 2 | 2.125    | ##### |
| 1 ES | 2020-13 | 2 ES-Northea | 2 | 3 | 1.976744 | ##### |
| 1 ES | 2020-13 | 2 ES-Northea | 2 | 4 | 2.092593 | ##### |
| 1 ES | 2020-13 | 2 ES-Northea | 2 | 5 | 1.375    | ##### |
| 1 ES | 2020-13 | 2 ES-Northea | 3 | 1 | 1.524083 | ##### |
| 1 ES | 2020-13 | 2 ES-Northea | 3 | 2 | 1        | 0     |
| 1 ES | 2020-13 | 2 ES-Northea | 3 | 3 | 1.294118 | ##### |
| 1 ES | 2020-13 | 2 ES-Northea | 3 | 4 | 1.764706 | ##### |
| 1 ES | 2020-13 | 2 ES-Northea | 3 | 5 | 2        | ##### |
| 1 ES | 2020-13 | 2 ES-Northw  | 1 | 1 | 1.695601 | ##### |
| 1 ES | 2020-13 | 2 ES-Northw  | 1 | 2 | 2.320002 | ##### |
| 1 ES | 2020-13 | 2 ES-Northw  | 1 | 3 | 1.841146 | ##### |
| 1 ES | 2020-13 | 2 ES-Northw  | 1 | 4 | 1.410856 | ##### |
| 1 ES | 2020-13 | 2 ES-Northw  | 1 | 5 | 1.466966 | ##### |
| 1 ES | 2020-13 | 2 ES-Northw  | 2 | 1 | 1.548027 | ##### |
| 1 ES | 2020-13 | 2 ES-Northw  | 2 | 2 | 2.416667 | ##### |
| 1 ES | 2020-13 | 2 ES-Northw  | 2 | 3 | 1.621212 | ##### |
| 1 ES | 2020-13 | 2 ES-Northw  | 2 | 4 | 1.315789 | ##### |
| 1 ES | 2020-13 | 2 ES-Northw  | 2 | 5 | 1.333333 | ##### |
| 1 ES | 2020-13 | 2 ES-Northw  | 3 | 1 | 1.839922 | ##### |
| 1 ES | 2020-13 | 2 ES-Northw  | 3 | 2 | 2.25     | ##### |
| 1 ES | 2020-13 | 2 ES-Northw  | 3 | 3 | 2.047619 | ##### |
| 1 ES | 2020-13 | 2 ES-Northw  | 3 | 4 | 1.48     | ##### |
| 1 ES | 2020-13 | 2 ES-Northw  | 3 | 5 | 1.7      | ##### |
| 1 ES | 2020-13 | 2 ES-Overall | 1 | 1 | 1.787761 | ##### |



|    |      |         |              |   |   |          |          |  |
|----|------|---------|--------------|---|---|----------|----------|--|
| 1  |      |         |              |   |   |          |          |  |
| 2  |      |         |              |   |   |          |          |  |
| 3  | 1 ES | 2020-13 | 2 ES-Overall | 1 | 2 | 2.360208 | #####    |  |
| 4  | 1 ES | 2020-13 | 2 ES-Overall | 1 | 3 | 1.822409 | #####    |  |
| 5  | 1 ES | 2020-13 | 2 ES-Overall | 1 | 4 | 1.81034  | #####    |  |
| 6  | 1 ES | 2020-13 | 2 ES-Overall | 1 | 5 | 1.235764 | #####    |  |
| 7  | 1 ES | 2020-13 | 2 ES-Overall | 2 | 1 | 1.803645 | #####    |  |
| 8  | 1 ES | 2020-13 | 2 ES-Overall | 2 | 2 | 2.453201 | #####    |  |
| 9  | 1 ES | 2020-13 | 2 ES-Overall | 2 | 3 | 1.945784 | #####    |  |
| 10 | 1 ES | 2020-13 | 2 ES-Overall | 2 | 4 | 1.721763 | #####    |  |
| 11 | 1 ES | 2020-13 | 2 ES-Overall | 2 | 5 | 1.252436 | #####    |  |
| 12 | 1 ES | 2020-13 | 2 ES-Overall | 3 | 1 | 1.772816 | #####    |  |
| 13 | 1 ES | 2020-13 | 2 ES-Overall | 3 | 2 | 2.281829 | #####    |  |
| 14 | 1 ES | 2020-13 | 2 ES-Overall | 3 | 3 | 1.711768 | #####    |  |
| 15 | 1 ES | 2020-13 | 2 ES-Overall | 3 | 4 | 1.892434 | #####    |  |
| 16 | 1 ES | 2020-13 | 2 ES-Overall | 3 | 5 | 1.216743 | #####    |  |
| 17 | 1 ES | 2020-13 | 2 ES-South   | 1 | 1 | 1.919407 | #####    |  |
| 18 | 1 ES | 2020-13 | 2 ES-South   | 1 | 2 | 2.574007 | #####    |  |
| 19 | 1 ES | 2020-13 | 2 ES-South   | 1 | 3 | 1.847126 | #####    |  |
| 20 | 1 ES | 2020-13 | 2 ES-South   | 1 | 4 | 2.190396 | #####    |  |
| 21 | 1 ES | 2020-13 | 2 ES-South   | 1 | 5 | 1.066738 | #####    |  |
| 22 | 1 ES | 2020-13 | 2 ES-South   | 2 | 1 | 2.076099 | #####    |  |
| 23 | 1 ES | 2020-13 | 2 ES-South   | 2 | 2 | 2.5      | #####    |  |
| 24 | 1 ES | 2020-13 | 2 ES-South   | 2 | 3 | 2.218182 | #####    |  |
| 25 | 1 ES | 2020-13 | 2 ES-South   | 2 | 4 | 2.12963  | #####    |  |
| 26 | 1 ES | 2020-13 | 2 ES-South   | 2 | 5 | 1.333333 | #####    |  |
| 27 | 1 ES | 2020-13 | 2 ES-South   | 3 | 1 | 1.785293 | #####    |  |
| 28 | 1 ES | 2020-13 | 2 ES-South   | 3 | 2 | 2.666667 | #####    |  |
| 29 | 1 ES | 2020-13 | 2 ES-South   | 3 | 3 | 1.533333 | #####    |  |
| 30 | 1 ES | 2020-13 | 2 ES-South   | 3 | 4 | 2.236842 | #####    |  |
| 31 | 1 ES | 2020-13 | 2 ES-South   | 3 | 5 | #####    | #####    |  |
| 32 | 1 ES | 2020-13 | 3 ES-Center  | 1 | 1 | #####    | #####    |  |
| 33 | 1 ES | 2020-13 | 3 ES-Center  | 1 | 2 | 0        | 0        |  |
| 34 | 1 ES | 2020-13 | 3 ES-Center  | 1 | 3 | #####    | #####    |  |
| 35 | 1 ES | 2020-13 | 3 ES-Center  | 1 | 4 | #####    | #####    |  |
| 36 | 1 ES | 2020-13 | 3 ES-Center  | 1 | 5 | 0        | 0        |  |
| 37 | 1 ES | 2020-13 | 3 ES-Center  | 2 | 1 | #####    | #####    |  |
| 38 | 1 ES | 2020-13 | 3 ES-Center  | 2 | 2 | 0        | 0        |  |
| 39 | 1 ES | 2020-13 | 3 ES-Center  | 2 | 3 | #####    | #####    |  |
| 40 | 1 ES | 2020-13 | 3 ES-Center  | 2 | 4 | #####    | #####    |  |
| 41 | 1 ES | 2020-13 | 3 ES-Center  | 2 | 5 | 0        | 0        |  |
| 42 | 1 ES | 2020-13 | 3 ES-Center  | 3 | 1 | 0        | 0        |  |
| 43 | 1 ES | 2020-13 | 3 ES-Center  | 3 | 2 | 0        | 0        |  |
| 44 | 1 ES | 2020-13 | 3 ES-Center  | 3 | 3 | 0        | 0        |  |
| 45 | 1 ES | 2020-13 | 3 ES-Center  | 3 | 4 | 0        | 0        |  |
| 46 | 1 ES | 2020-13 | 3 ES-Center  | 3 | 5 | 0        | 0        |  |
| 47 | 1 ES | 2020-13 | 3 ES-East    | 1 | 1 | #####    | #####    |  |
| 48 | 1 ES | 2020-13 | 3 ES-East    | 1 | 2 | 1.923028 | 1.823285 |  |
| 49 | 1 ES | 2020-13 | 3 ES-East    | 1 | 3 | 0        | 0        |  |
| 50 | 1 ES | 2020-13 | 3 ES-East    | 1 | 4 | 0        | 0        |  |
| 51 | 1 ES | 2020-13 | 3 ES-East    | 1 | 5 | #####    | #####    |  |
| 52 | 1 ES | 2020-13 | 3 ES-East    | 2 | 1 | #####    | #####    |  |
| 53 | 1 ES | 2020-13 | 3 ES-East    | 2 | 2 | 0        | 0        |  |
| 54 | 1 ES | 2020-13 | 3 ES-East    | 2 | 3 | 0        | 0        |  |
| 55 | 1 ES | 2020-13 | 3 ES-East    | 2 | 4 | 0        | 0        |  |
| 56 | 1 ES | 2020-13 | 3 ES-East    | 2 | 5 | #####    | #####    |  |
| 57 | 1 ES | 2020-13 | 3 ES-East    | 3 | 1 | #####    | #####    |  |
| 58 | 1 ES | 2020-13 | 3 ES-East    | 3 | 2 | 3.571429 | 3.306809 |  |
| 59 | 1 ES | 2020-13 | 3 ES-East    | 3 |   |          |          |  |
| 60 | 1 ES | 2020-13 | 3 ES-East    | 3 |   |          |          |  |

1  
2  
3  
4  
5  
6  
7  
8  
9  
10  
11  
12  
13  
14  
15  
16  
17  
18  
19  
20  
21  
22  
23  
24  
25  
26  
27  
28  
29  
30  
31  
32  
33  
34  
35  
36  
37  
38  
39  
40  
41  
42  
43  
44  
45  
46  
47  
48  
49  
50  
51  
52  
53  
54  
55  
56  
57  
58  
59  
60

|      |         |                |   |   |       |       |
|------|---------|----------------|---|---|-------|-------|
| 1 ES | 2020-13 | 3 ES-East      | 3 | 3 | 0     | 0     |
| 1 ES | 2020-13 | 3 ES-East      | 3 | 4 | 0     | 0     |
| 1 ES | 2020-13 | 3 ES-East      | 3 | 5 | 0     | 0     |
| 1 ES | 2020-13 | 3 ES-Island    | 1 | 1 | 0     | 0     |
| 1 ES | 2020-13 | 3 ES-Island    | 1 | 2 | 0     | 0     |
| 1 ES | 2020-13 | 3 ES-Island    | 1 | 3 | 0     | 0     |
| 1 ES | 2020-13 | 3 ES-Island    | 1 | 4 | 0     | 0     |
| 1 ES | 2020-13 | 3 ES-Island    | 1 | 5 | 0     | 0     |
| 1 ES | 2020-13 | 3 ES-Island    | 2 | 1 | 0     | 0     |
| 1 ES | 2020-13 | 3 ES-Island    | 2 | 2 | 0     | 0     |
| 1 ES | 2020-13 | 3 ES-Island    | 2 | 3 | 0     | 0     |
| 1 ES | 2020-13 | 3 ES-Island    | 2 | 4 | 0     | 0     |
| 1 ES | 2020-13 | 3 ES-Island    | 2 | 5 | 0     | 0     |
| 1 ES | 2020-13 | 3 ES-Island    | 3 | 1 | 0     | 0     |
| 1 ES | 2020-13 | 3 ES-Island    | 3 | 3 | 0     | 0     |
| 1 ES | 2020-13 | 3 ES-Island    | 3 | 4 | 0     | 0     |
| 1 ES | 2020-13 | 3 ES-Island    | 3 | 5 | 0     | 0     |
| 1 ES | 2020-13 | 3 ES-Madrid    | 1 | 1 | 0     | 0     |
| 1 ES | 2020-13 | 3 ES-Madrid    | 1 | 2 | 0     | 0     |
| 1 ES | 2020-13 | 3 ES-Madrid    | 1 | 3 | 0     | 0     |
| 1 ES | 2020-13 | 3 ES-Madrid    | 1 | 4 | 0     | 0     |
| 1 ES | 2020-13 | 3 ES-Madrid    | 1 | 5 | 0     | 0     |
| 1 ES | 2020-13 | 3 ES-Madrid    | 2 | 1 | 0     | 0     |
| 1 ES | 2020-13 | 3 ES-Madrid    | 2 | 2 | 0     | 0     |
| 1 ES | 2020-13 | 3 ES-Madrid    | 2 | 3 | 0     | 0     |
| 1 ES | 2020-13 | 3 ES-Madrid    | 2 | 4 | 0     | 0     |
| 1 ES | 2020-13 | 3 ES-Madrid    | 2 | 5 | 0     | 0     |
| 1 ES | 2020-13 | 3 ES-Madrid    | 3 | 1 | 0     | 0     |
| 1 ES | 2020-13 | 3 ES-Madrid    | 3 | 2 | 0     | 0     |
| 1 ES | 2020-13 | 3 ES-Madrid    | 3 | 3 | 0     | 0     |
| 1 ES | 2020-13 | 3 ES-Madrid    | 3 | 4 | 0     | 0     |
| 1 ES | 2020-13 | 3 ES-Madrid    | 3 | 5 | 0     | 0     |
| 1 ES | 2020-13 | 3 ES-Northeast | 1 | 1 | ##### | ##### |
| 1 ES | 2020-13 | 3 ES-Northeast | 1 | 2 | 0     | 0     |
| 1 ES | 2020-13 | 3 ES-Northeast | 1 | 3 | 0     | 0     |
| 1 ES | 2020-13 | 3 ES-Northeast | 1 | 4 | ##### | ##### |
| 1 ES | 2020-13 | 3 ES-Northeast | 1 | 5 | 0     | 0     |
| 1 ES | 2020-13 | 3 ES-Northeast | 2 | 1 | ##### | ##### |
| 1 ES | 2020-13 | 3 ES-Northeast | 2 | 2 | 0     | 0     |
| 1 ES | 2020-13 | 3 ES-Northeast | 2 | 3 | 0     | 0     |
| 1 ES | 2020-13 | 3 ES-Northeast | 2 | 4 | ##### | ##### |
| 1 ES | 2020-13 | 3 ES-Northeast | 2 | 5 | 0     | 0     |
| 1 ES | 2020-13 | 3 ES-Northeast | 3 | 1 | 0     | 0     |
| 1 ES | 2020-13 | 3 ES-Northeast | 3 | 2 | 0     | 0     |
| 1 ES | 2020-13 | 3 ES-Northeast | 3 | 3 | 0     | 0     |
| 1 ES | 2020-13 | 3 ES-Northeast | 3 | 4 | 0     | 0     |
| 1 ES | 2020-13 | 3 ES-Northeast | 3 | 5 | 0     | 0     |
| 1 ES | 2020-13 | 3 ES-Northwest | 1 | 1 | ##### | ##### |
| 1 ES | 2020-13 | 3 ES-Northwest | 1 | 2 | 0     | 0     |
| 1 ES | 2020-13 | 3 ES-Northwest | 1 | 3 | ##### | ##### |
| 1 ES | 2020-13 | 3 ES-Northwest | 1 | 4 | ##### | ##### |
| 1 ES | 2020-13 | 3 ES-Northwest | 1 | 5 | 0     | 0     |
| 1 ES | 2020-13 | 3 ES-Northwest | 2 | 1 | ##### | ##### |
| 1 ES | 2020-13 | 3 ES-Northwest | 2 | 2 | 0     | 0     |
| 1 ES | 2020-13 | 3 ES-Northwest | 2 | 3 | ##### | ##### |
| 1 ES | 2020-13 | 3 ES-Northwest | 2 | 4 | ##### | ##### |

|    |      |         |              |   |   |          |          |  |
|----|------|---------|--------------|---|---|----------|----------|--|
| 1  |      |         |              |   |   |          |          |  |
| 2  |      |         |              |   |   |          |          |  |
| 3  | 1 ES | 2020-13 | 3 ES-Northw  | 2 | 5 | 0        | 0        |  |
| 4  | 1 ES | 2020-13 | 3 ES-Northw  | 3 | 1 | 0        | 0        |  |
| 5  | 1 ES | 2020-13 | 3 ES-Northw  | 3 | 2 | 0        | 0        |  |
| 6  | 1 ES | 2020-13 | 3 ES-Northw  | 3 | 3 | 0        | 0        |  |
| 7  | 1 ES | 2020-13 | 3 ES-Northw  | 3 | 4 | 0        | 0        |  |
| 8  | 1 ES | 2020-13 | 3 ES-Northw  | 3 | 5 | 0        | 0        |  |
| 9  | 1 ES | 2020-13 | 3 ES-Overall | 1 | 1 | #####    | #####    |  |
| 10 | 1 ES | 2020-13 | 3 ES-Overall | 1 | 2 | #####    | #####    |  |
| 11 | 1 ES | 2020-13 | 3 ES-Overall | 1 | 3 | #####    | #####    |  |
| 12 | 1 ES | 2020-13 | 3 ES-Overall | 1 | 4 | #####    | #####    |  |
| 13 | 1 ES | 2020-13 | 3 ES-Overall | 1 | 5 | #####    | #####    |  |
| 14 | 1 ES | 2020-13 | 3 ES-Overall | 2 | 1 | #####    | #####    |  |
| 15 | 1 ES | 2020-13 | 3 ES-Overall | 2 | 2 | 0        | 0        |  |
| 16 | 1 ES | 2020-13 | 3 ES-Overall | 2 | 3 | #####    | #####    |  |
| 17 | 1 ES | 2020-13 | 3 ES-Overall | 2 | 4 | #####    | #####    |  |
| 18 | 1 ES | 2020-13 | 3 ES-Overall | 2 | 5 | #####    | #####    |  |
| 19 | 1 ES | 2020-13 | 3 ES-Overall | 3 | 1 | #####    | #####    |  |
| 20 | 1 ES | 2020-13 | 3 ES-Overall | 3 | 2 | 1.037829 | 1.012927 |  |
| 21 | 1 ES | 2020-13 | 3 ES-Overall | 3 | 3 | 0        | 0        |  |
| 22 | 1 ES | 2020-13 | 3 ES-Overall | 3 | 4 | 0        | 0        |  |
| 23 | 1 ES | 2020-13 | 3 ES-Overall | 3 | 5 | 0        | 0        |  |
| 24 | 1 ES | 2020-13 | 3 ES-Overall | 3 | 5 | 0        | 0        |  |
| 25 | 1 ES | 2020-13 | 3 ES-South   | 1 | 1 | #####    | #####    |  |
| 26 | 1 ES | 2020-13 | 3 ES-South   | 1 | 2 | 0        | 0        |  |
| 27 | 1 ES | 2020-13 | 3 ES-South   | 1 | 3 | #####    | #####    |  |
| 28 | 1 ES | 2020-13 | 3 ES-South   | 1 | 4 | #####    | #####    |  |
| 29 | 1 ES | 2020-13 | 3 ES-South   | 1 | 5 | #####    | #####    |  |
| 30 | 1 ES | 2020-13 | 3 ES-South   | 2 | 1 | #####    | #####    |  |
| 31 | 1 ES | 2020-13 | 3 ES-South   | 2 | 2 | 0        | 0        |  |
| 32 | 1 ES | 2020-13 | 3 ES-South   | 2 | 3 | #####    | #####    |  |
| 33 | 1 ES | 2020-13 | 3 ES-South   | 2 | 4 | #####    | #####    |  |
| 34 | 1 ES | 2020-13 | 3 ES-South   | 2 | 5 | #####    | #####    |  |
| 35 | 1 ES | 2020-13 | 3 ES-South   | 3 | 1 | 0        | 0        |  |
| 36 | 1 ES | 2020-13 | 3 ES-South   | 3 | 2 | 0        | 0        |  |
| 37 | 1 ES | 2020-13 | 3 ES-South   | 3 | 3 | 0        | 0        |  |
| 38 | 1 ES | 2020-13 | 3 ES-South   | 3 | 4 | 0        | 0        |  |
| 39 | 1 ES | 2020-13 | 3 ES-South   | 3 | 5 | 0        | 0        |  |
| 40 | 1 ES | 2020-13 | 4 ES-Center  | 1 | 1 | #####    | #####    |  |
| 41 | 1 ES | 2020-13 | 4 ES-Center  | 1 | 2 | 2.049342 | 1.795605 |  |
| 42 | 1 ES | 2020-13 | 4 ES-Center  | 1 | 3 | 1.080302 | #####    |  |
| 43 | 1 ES | 2020-13 | 4 ES-Center  | 1 | 4 | #####    | #####    |  |
| 44 | 1 ES | 2020-13 | 4 ES-Center  | 1 | 5 | 0        | 0        |  |
| 45 | 1 ES | 2020-13 | 4 ES-Center  | 2 | 1 | #####    | #####    |  |
| 46 | 1 ES | 2020-13 | 4 ES-Center  | 2 | 2 | 0        | 0        |  |
| 47 | 1 ES | 2020-13 | 4 ES-Center  | 2 | 3 | #####    | #####    |  |
| 48 | 1 ES | 2020-13 | 4 ES-Center  | 2 | 4 | #####    | #####    |  |
| 49 | 1 ES | 2020-13 | 4 ES-Center  | 2 | 5 | 0        | 0        |  |
| 50 | 1 ES | 2020-13 | 4 ES-Center  | 3 | 1 | 1.543706 | #####    |  |
| 51 | 1 ES | 2020-13 | 4 ES-Center  | 3 | 2 | 4        | 3.266291 |  |
| 52 | 1 ES | 2020-13 | 4 ES-Center  | 3 | 3 | 1.6875   | 1.509794 |  |
| 53 | 1 ES | 2020-13 | 4 ES-Center  | 3 | 4 | 1.368421 | #####    |  |
| 54 | 1 ES | 2020-13 | 4 ES-Center  | 3 | 5 | 0        | 0        |  |
| 55 | 1 ES | 2020-13 | 4 ES-East    | 1 | 1 | #####    | #####    |  |
| 56 | 1 ES | 2020-13 | 4 ES-East    | 1 | 2 | #####    | #####    |  |
| 57 | 1 ES | 2020-13 | 4 ES-East    | 1 | 3 | #####    | #####    |  |
| 58 | 1 ES | 2020-13 | 4 ES-East    | 1 | 4 | #####    | #####    |  |
| 59 | 1 ES | 2020-13 | 4 ES-East    | 1 | 5 | #####    | #####    |  |
| 60 | 1 ES | 2020-13 | 4 ES-East    | 1 | 5 | #####    | #####    |  |

1  
2  
3  
4  
5  
6  
7  
8  
9  
10  
11  
12  
13  
14  
15  
16  
17  
18  
19  
20  
21  
22  
23  
24  
25  
26  
27  
28  
29  
30  
31  
32  
33  
34  
35  
36  
37  
38  
39  
40  
41  
42  
43  
44  
45  
46  
47  
48  
49  
50  
51  
52  
53  
54  
55  
56  
57  
58  
59  
60

|      |         |              |   |   |          |          |
|------|---------|--------------|---|---|----------|----------|
| 1 ES | 2020-13 | 4 ES-East    | 2 | 1 | #####    | #####    |
| 1 ES | 2020-13 | 4 ES-East    | 2 | 2 | 0.8125   | #####    |
| 1 ES | 2020-13 | 4 ES-East    | 2 | 3 | #####    | #####    |
| 1 ES | 2020-13 | 4 ES-East    | 2 | 4 | 1.052083 | #####    |
| 1 ES | 2020-13 | 4 ES-East    | 2 | 5 | #####    | #####    |
| 1 ES | 2020-13 | 4 ES-East    | 3 | 1 | #####    | #####    |
| 1 ES | 2020-13 | 4 ES-East    | 3 | 2 | 0        | 0        |
| 1 ES | 2020-13 | 4 ES-East    | 3 | 3 | 1.083333 | #####    |
| 1 ES | 2020-13 | 4 ES-East    | 3 | 4 | #####    | #####    |
| 1 ES | 2020-13 | 4 ES-East    | 3 | 5 | 0        | 0        |
| 1 ES | 2020-13 | 4 ES-Island  | 1 | 1 | #####    | #####    |
| 1 ES | 2020-13 | 4 ES-Island  | 1 | 2 | 0        | 0        |
| 1 ES | 2020-13 | 4 ES-Island  | 1 | 3 | 1.64725  | #####    |
| 1 ES | 2020-13 | 4 ES-Island  | 1 | 4 | #####    | #####    |
| 1 ES | 2020-13 | 4 ES-Island  | 1 | 5 | #####    | #####    |
| 1 ES | 2020-13 | 4 ES-Island  | 2 | 1 | #####    | #####    |
| 1 ES | 2020-13 | 4 ES-Island  | 2 | 2 | 0        | 0        |
| 1 ES | 2020-13 | 4 ES-Island  | 2 | 3 | 1.78125  | #####    |
| 1 ES | 2020-13 | 4 ES-Island  | 2 | 4 | #####    | #####    |
| 1 ES | 2020-13 | 4 ES-Island  | 2 | 5 | 0        | 0        |
| 1 ES | 2020-13 | 4 ES-Island  | 3 | 1 | 1.127101 | #####    |
| 1 ES | 2020-13 | 4 ES-Island  | 3 | 3 | 1.428571 | 1.322724 |
| 1 ES | 2020-13 | 4 ES-Island  | 3 | 4 | 1.416667 | #####    |
| 1 ES | 2020-13 | 4 ES-Island  | 3 | 5 | 0.3      | #####    |
| 1 ES | 2020-13 | 4 ES-Madrid  | 1 | 1 | #####    | #####    |
| 1 ES | 2020-13 | 4 ES-Madrid  | 1 | 2 | #####    | #####    |
| 1 ES | 2020-13 | 4 ES-Madrid  | 1 | 3 | #####    | #####    |
| 1 ES | 2020-13 | 4 ES-Madrid  | 1 | 4 | #####    | #####    |
| 1 ES | 2020-13 | 4 ES-Madrid  | 1 | 5 | #####    | #####    |
| 1 ES | 2020-13 | 4 ES-Madrid  | 2 | 1 | #####    | #####    |
| 1 ES | 2020-13 | 4 ES-Madrid  | 2 | 2 | #####    | #####    |
| 1 ES | 2020-13 | 4 ES-Madrid  | 2 | 3 | #####    | #####    |
| 1 ES | 2020-13 | 4 ES-Madrid  | 2 | 4 | #####    | #####    |
| 1 ES | 2020-13 | 4 ES-Madrid  | 2 | 5 | #####    | #####    |
| 1 ES | 2020-13 | 4 ES-Madrid  | 3 | 1 | #####    | #####    |
| 1 ES | 2020-13 | 4 ES-Madrid  | 3 | 2 | #####    | #####    |
| 1 ES | 2020-13 | 4 ES-Madrid  | 3 | 3 | 0        | 0        |
| 1 ES | 2020-13 | 4 ES-Madrid  | 3 | 4 | 1.121212 | #####    |
| 1 ES | 2020-13 | 4 ES-Madrid  | 3 | 5 | 0        | 0        |
| 1 ES | 2020-13 | 4 ES-Northea | 1 | 1 | #####    | #####    |
| 1 ES | 2020-13 | 4 ES-Northea | 1 | 2 | 4.050656 | 2.194772 |
| 1 ES | 2020-13 | 4 ES-Northea | 1 | 3 | #####    | #####    |
| 1 ES | 2020-13 | 4 ES-Northea | 1 | 4 | #####    | #####    |
| 1 ES | 2020-13 | 4 ES-Northea | 1 | 5 | #####    | #####    |
| 1 ES | 2020-13 | 4 ES-Northea | 2 | 1 | #####    | #####    |
| 1 ES | 2020-13 | 4 ES-Northea | 2 | 2 | 3        | 2.318621 |
| 1 ES | 2020-13 | 4 ES-Northea | 2 | 3 | #####    | #####    |
| 1 ES | 2020-13 | 4 ES-Northea | 2 | 4 | #####    | #####    |
| 1 ES | 2020-13 | 4 ES-Northea | 2 | 5 | 0        | 0        |
| 1 ES | 2020-13 | 4 ES-Northea | 3 | 1 | 1.137507 | #####    |
| 1 ES | 2020-13 | 4 ES-Northea | 3 | 2 | 5        | 3.535864 |
| 1 ES | 2020-13 | 4 ES-Northea | 3 | 3 | 1.176471 | 1.141451 |
| 1 ES | 2020-13 | 4 ES-Northea | 3 | 4 | 0        | 0        |
| 1 ES | 2020-13 | 4 ES-Northea | 3 | 5 | 0.1      | #####    |
| 1 ES | 2020-13 | 4 ES-Northw  | 1 | 1 | #####    | #####    |
| 1 ES | 2020-13 | 4 ES-Northw  | 1 | 2 | 0        | 0        |

|    |      |         |              |   |   |          |          |  |
|----|------|---------|--------------|---|---|----------|----------|--|
| 1  |      |         |              |   |   |          |          |  |
| 2  |      |         |              |   |   |          |          |  |
| 3  | 1 ES | 2020-13 | 4 ES-Northw  | 1 | 3 | #####    | #####    |  |
| 4  | 1 ES | 2020-13 | 4 ES-Northw  | 1 | 4 | 1.025274 | #####    |  |
| 5  | 1 ES | 2020-13 | 4 ES-Northw  | 1 | 5 | #####    | #####    |  |
| 6  | 1 ES | 2020-13 | 4 ES-Northw  | 2 | 1 | #####    | #####    |  |
| 7  | 1 ES | 2020-13 | 4 ES-Northw  | 2 | 2 | 0        | 0        |  |
| 8  | 1 ES | 2020-13 | 4 ES-Northw  | 2 | 3 | 1        | #####    |  |
| 9  | 1 ES | 2020-13 | 4 ES-Northw  | 2 | 4 | 1.5      | #####    |  |
| 10 | 1 ES | 2020-13 | 4 ES-Northw  | 2 | 5 | #####    | #####    |  |
| 11 | 1 ES | 2020-13 | 4 ES-Northw  | 3 | 1 | #####    | #####    |  |
| 12 | 1 ES | 2020-13 | 4 ES-Northw  | 3 | 2 | 0        | 0        |  |
| 13 | 1 ES | 2020-13 | 4 ES-Northw  | 3 | 3 | 0.85     | #####    |  |
| 14 | 1 ES | 2020-13 | 4 ES-Northw  | 3 | 4 | 0.68     | #####    |  |
| 15 | 1 ES | 2020-13 | 4 ES-Northw  | 3 | 5 | #####    | #####    |  |
| 16 | 1 ES | 2020-13 | 4 ES-Overall | 1 | 1 | #####    | #####    |  |
| 17 | 1 ES | 2020-13 | 4 ES-Overall | 1 | 2 | #####    | #####    |  |
| 18 | 1 ES | 2020-13 | 4 ES-Overall | 1 | 3 | #####    | #####    |  |
| 19 | 1 ES | 2020-13 | 4 ES-Overall | 1 | 4 | #####    | #####    |  |
| 20 | 1 ES | 2020-13 | 4 ES-Overall | 1 | 5 | #####    | #####    |  |
| 21 | 1 ES | 2020-13 | 4 ES-Overall | 2 | 1 | #####    | #####    |  |
| 22 | 1 ES | 2020-13 | 4 ES-Overall | 2 | 2 | #####    | #####    |  |
| 23 | 1 ES | 2020-13 | 4 ES-Overall | 2 | 3 | #####    | #####    |  |
| 24 | 1 ES | 2020-13 | 4 ES-Overall | 2 | 4 | #####    | #####    |  |
| 25 | 1 ES | 2020-13 | 4 ES-Overall | 2 | 5 | #####    | #####    |  |
| 26 | 1 ES | 2020-13 | 4 ES-Overall | 2 | 5 | #####    | #####    |  |
| 27 | 1 ES | 2020-13 | 4 ES-Overall | 3 | 1 | #####    | #####    |  |
| 28 | 1 ES | 2020-13 | 4 ES-Overall | 3 | 2 | 1.387608 | #####    |  |
| 29 | 1 ES | 2020-13 | 4 ES-Overall | 3 | 3 | #####    | #####    |  |
| 30 | 1 ES | 2020-13 | 4 ES-Overall | 3 | 4 | #####    | #####    |  |
| 31 | 1 ES | 2020-13 | 4 ES-Overall | 3 | 5 | #####    | #####    |  |
| 32 | 1 ES | 2020-13 | 4 ES-South   | 1 | 1 | #####    | #####    |  |
| 33 | 1 ES | 2020-13 | 4 ES-South   | 1 | 2 | 1.62816  | #####    |  |
| 34 | 1 ES | 2020-13 | 4 ES-South   | 1 | 3 | #####    | #####    |  |
| 35 | 1 ES | 2020-13 | 4 ES-South   | 1 | 4 | #####    | #####    |  |
| 36 | 1 ES | 2020-13 | 4 ES-South   | 1 | 5 | 0        | 0        |  |
| 37 | 1 ES | 2020-13 | 4 ES-South   | 2 | 1 | #####    | #####    |  |
| 38 | 1 ES | 2020-13 | 4 ES-South   | 2 | 2 | 0        | 0        |  |
| 39 | 1 ES | 2020-13 | 4 ES-South   | 2 | 3 | #####    | #####    |  |
| 40 | 1 ES | 2020-13 | 4 ES-South   | 2 | 4 | #####    | #####    |  |
| 41 | 1 ES | 2020-13 | 4 ES-South   | 2 | 5 | 0        | 0        |  |
| 42 | 1 ES | 2020-13 | 4 ES-South   | 3 | 1 | #####    | #####    |  |
| 43 | 1 ES | 2020-13 | 4 ES-South   | 3 | 2 | 3.666667 | 1.655673 |  |
| 44 | 1 ES | 2020-13 | 4 ES-South   | 3 | 3 | 0        | 0        |  |
| 45 | 1 ES | 2020-13 | 4 ES-South   | 3 | 4 | #####    | #####    |  |
| 46 | 1 ES | 2020-13 | 4 ES-South   | 3 | 5 | 0        | 0        |  |
| 47 | 1 ES | 2020-13 | 5 ES-Center  | 1 | 1 | #####    | #####    |  |
| 48 | 1 ES | 2020-13 | 5 ES-Center  | 1 | 2 | #####    | #####    |  |
| 49 | 1 ES | 2020-13 | 5 ES-Center  | 1 | 3 | #####    | #####    |  |
| 50 | 1 ES | 2020-13 | 5 ES-Center  | 1 | 4 | #####    | #####    |  |
| 51 | 1 ES | 2020-13 | 5 ES-Center  | 1 | 5 | #####    | #####    |  |
| 52 | 1 ES | 2020-13 | 5 ES-Center  | 2 | 1 | #####    | #####    |  |
| 53 | 1 ES | 2020-13 | 5 ES-Center  | 2 | 2 | 0.8      | #####    |  |
| 54 | 1 ES | 2020-13 | 5 ES-Center  | 2 | 3 | #####    | #####    |  |
| 55 | 1 ES | 2020-13 | 5 ES-Center  | 2 | 4 | #####    | #####    |  |
| 56 | 1 ES | 2020-13 | 5 ES-Center  | 2 | 5 | 0        | 0        |  |
| 57 | 1 ES | 2020-13 | 5 ES-Center  | 3 | 1 | #####    | #####    |  |
| 58 | 1 ES | 2020-13 | 5 ES-Center  | 3 | 2 | 0        | 0        |  |
| 59 | 1 ES | 2020-13 | 5 ES-Center  | 3 | 3 | 0.3125   | #####    |  |
| 60 | 1 ES | 2020-13 | 5 ES-Center  | 3 | 3 | 0.3125   | #####    |  |

|    |      |         |              |   |   |          |          |  |
|----|------|---------|--------------|---|---|----------|----------|--|
| 1  |      |         |              |   |   |          |          |  |
| 2  |      |         |              |   |   |          |          |  |
| 3  | 1 ES | 2020-13 | 5 ES-Center  | 3 | 4 | #####    | #####    |  |
| 4  | 1 ES | 2020-13 | 5 ES-Center  | 3 | 5 | #####    | #####    |  |
| 5  | 1 ES | 2020-13 | 5 ES-East    | 1 | 1 | #####    | #####    |  |
| 6  | 1 ES | 2020-13 | 5 ES-East    | 1 | 2 | #####    | #####    |  |
| 7  | 1 ES | 2020-13 | 5 ES-East    | 1 | 3 | #####    | #####    |  |
| 8  | 1 ES | 2020-13 | 5 ES-East    | 1 | 4 | #####    | #####    |  |
| 9  | 1 ES | 2020-13 | 5 ES-East    | 1 | 5 | #####    | #####    |  |
| 10 | 1 ES | 2020-13 | 5 ES-East    | 2 | 1 | #####    | #####    |  |
| 11 | 1 ES | 2020-13 | 5 ES-East    | 2 | 2 | #####    | #####    |  |
| 12 | 1 ES | 2020-13 | 5 ES-East    | 2 | 3 | 0.6375   | #####    |  |
| 13 | 1 ES | 2020-13 | 5 ES-East    | 2 | 4 | #####    | #####    |  |
| 14 | 1 ES | 2020-13 | 5 ES-East    | 2 | 5 | #####    | #####    |  |
| 15 | 1 ES | 2020-13 | 5 ES-East    | 3 | 1 | #####    | #####    |  |
| 16 | 1 ES | 2020-13 | 5 ES-East    | 3 | 2 | #####    | #####    |  |
| 17 | 1 ES | 2020-13 | 5 ES-East    | 3 | 3 | #####    | #####    |  |
| 18 | 1 ES | 2020-13 | 5 ES-East    | 3 | 4 | 1.166667 | #####    |  |
| 19 | 1 ES | 2020-13 | 5 ES-East    | 3 | 5 | #####    | #####    |  |
| 20 | 1 ES | 2020-13 | 5 ES-East    | 3 | 5 | #####    | #####    |  |
| 21 | 1 ES | 2020-13 | 5 ES-Island  | 1 | 1 | #####    | #####    |  |
| 22 | 1 ES | 2020-13 | 5 ES-Island  | 1 | 2 | 1.363636 | #####    |  |
| 23 | 1 ES | 2020-13 | 5 ES-Island  | 1 | 3 | #####    | #####    |  |
| 24 | 1 ES | 2020-13 | 5 ES-Island  | 1 | 4 | 1.401931 | #####    |  |
| 25 | 1 ES | 2020-13 | 5 ES-Island  | 1 | 5 | #####    | #####    |  |
| 26 | 1 ES | 2020-13 | 5 ES-Island  | 2 | 1 | #####    | #####    |  |
| 27 | 1 ES | 2020-13 | 5 ES-Island  | 2 | 2 | 1.363636 | #####    |  |
| 28 | 1 ES | 2020-13 | 5 ES-Island  | 2 | 3 | 1        | #####    |  |
| 29 | 1 ES | 2020-13 | 5 ES-Island  | 2 | 4 | #####    | #####    |  |
| 30 | 1 ES | 2020-13 | 5 ES-Island  | 2 | 5 | #####    | #####    |  |
| 31 | 1 ES | 2020-13 | 5 ES-Island  | 3 | 1 | #####    | #####    |  |
| 32 | 1 ES | 2020-13 | 5 ES-Island  | 3 | 3 | #####    | #####    |  |
| 33 | 1 ES | 2020-13 | 5 ES-Island  | 3 | 4 | 2.166667 | 1.821469 |  |
| 34 | 1 ES | 2020-13 | 5 ES-Island  | 3 | 5 | 0        | 0        |  |
| 35 | 1 ES | 2020-13 | 5 ES-Madrid  | 1 | 1 | #####    | #####    |  |
| 36 | 1 ES | 2020-13 | 5 ES-Madrid  | 1 | 2 | #####    | #####    |  |
| 37 | 1 ES | 2020-13 | 5 ES-Madrid  | 1 | 3 | 1.304128 | #####    |  |
| 38 | 1 ES | 2020-13 | 5 ES-Madrid  | 1 | 4 | 1        | #####    |  |
| 39 | 1 ES | 2020-13 | 5 ES-Madrid  | 1 | 5 | #####    | #####    |  |
| 40 | 1 ES | 2020-13 | 5 ES-Madrid  | 2 | 1 | #####    | #####    |  |
| 41 | 1 ES | 2020-13 | 5 ES-Madrid  | 2 | 2 | 1.066667 | #####    |  |
| 42 | 1 ES | 2020-13 | 5 ES-Madrid  | 2 | 3 | #####    | #####    |  |
| 43 | 1 ES | 2020-13 | 5 ES-Madrid  | 2 | 4 | 1        | #####    |  |
| 44 | 1 ES | 2020-13 | 5 ES-Madrid  | 2 | 5 | #####    | #####    |  |
| 45 | 1 ES | 2020-13 | 5 ES-Madrid  | 3 | 1 | 1.042928 | #####    |  |
| 46 | 1 ES | 2020-13 | 5 ES-Madrid  | 3 | 2 | #####    | #####    |  |
| 47 | 1 ES | 2020-13 | 5 ES-Madrid  | 3 | 3 | 2        | #####    |  |
| 48 | 1 ES | 2020-13 | 5 ES-Madrid  | 3 | 4 | 1        | #####    |  |
| 49 | 1 ES | 2020-13 | 5 ES-Madrid  | 3 | 5 | 0.8      | #####    |  |
| 50 | 1 ES | 2020-13 | 5 ES-Northea | 1 | 1 | #####    | #####    |  |
| 51 | 1 ES | 2020-13 | 5 ES-Northea | 1 | 2 | #####    | #####    |  |
| 52 | 1 ES | 2020-13 | 5 ES-Northea | 1 | 3 | 1.256992 | #####    |  |
| 53 | 1 ES | 2020-13 | 5 ES-Northea | 1 | 4 | #####    | #####    |  |
| 54 | 1 ES | 2020-13 | 5 ES-Northea | 1 | 5 | #####    | #####    |  |
| 55 | 1 ES | 2020-13 | 5 ES-Northea | 2 | 1 | #####    | #####    |  |
| 56 | 1 ES | 2020-13 | 5 ES-Northea | 2 | 2 | 0.25     | #####    |  |
| 57 | 1 ES | 2020-13 | 5 ES-Northea | 2 | 3 | #####    | #####    |  |
| 58 | 1 ES | 2020-13 | 5 ES-Northea | 2 | 4 | #####    | #####    |  |
| 59 | 1 ES | 2020-13 | 5 ES-Northea | 2 | 5 | 0.75     | #####    |  |
| 60 | 1 ES | 2020-13 | 5 ES-Northea | 2 | 5 | 0.75     | #####    |  |

|    |      |         |              |   |   |          |          |
|----|------|---------|--------------|---|---|----------|----------|
| 1  |      |         |              |   |   |          |          |
| 2  |      |         |              |   |   |          |          |
| 3  | 1 ES | 2020-13 | 5 ES-Northea | 3 | 1 | #####    | #####    |
| 4  | 1 ES | 2020-13 | 5 ES-Northea | 3 | 2 | 0        | 0        |
| 5  | 1 ES | 2020-13 | 5 ES-Northea | 3 | 3 | 1.823529 | 1.129258 |
| 6  | 1 ES | 2020-13 | 5 ES-Northea | 3 | 4 | #####    | #####    |
| 7  | 1 ES | 2020-13 | 5 ES-Northea | 3 | 5 | 0.1      | #####    |
| 8  | 1 ES | 2020-13 | 5 ES-Northw  | 1 | 1 | 1.042083 | #####    |
| 9  | 1 ES | 2020-13 | 5 ES-Northw  | 1 | 2 | 1.91497  | #####    |
| 10 | 1 ES | 2020-13 | 5 ES-Northw  | 1 | 3 | 1.400951 | #####    |
| 11 | 1 ES | 2020-13 | 5 ES-Northw  | 1 | 4 | #####    | #####    |
| 12 | 1 ES | 2020-13 | 5 ES-Northw  | 1 | 5 | #####    | #####    |
| 13 | 1 ES | 2020-13 | 5 ES-Northw  | 2 | 1 | #####    | #####    |
| 14 | 1 ES | 2020-13 | 5 ES-Northw  | 2 | 2 | #####    | #####    |
| 15 | 1 ES | 2020-13 | 5 ES-Northw  | 2 | 3 | #####    | #####    |
| 16 | 1 ES | 2020-13 | 5 ES-Northw  | 2 | 4 | #####    | #####    |
| 17 | 1 ES | 2020-13 | 5 ES-Northw  | 2 | 5 | #####    | #####    |
| 18 | 1 ES | 2020-13 | 5 ES-Northw  | 3 | 1 | 1.366701 | #####    |
| 19 | 1 ES | 2020-13 | 5 ES-Northw  | 3 | 2 | 3        | 1.274874 |
| 20 | 1 ES | 2020-13 | 5 ES-Northw  | 3 | 3 | 2.047619 | #####    |
| 21 | 1 ES | 2020-13 | 5 ES-Northw  | 3 | 4 | 0.24     | #####    |
| 22 | 1 ES | 2020-13 | 5 ES-Northw  | 3 | 5 | #####    | #####    |
| 23 | 1 ES | 2020-13 | 5 ES-Northw  | 3 | 5 | #####    | #####    |
| 24 | 1 ES | 2020-13 | 5 ES-Overall | 1 | 1 | #####    | #####    |
| 25 | 1 ES | 2020-13 | 5 ES-Overall | 1 | 2 | #####    | #####    |
| 26 | 1 ES | 2020-13 | 5 ES-Overall | 1 | 3 | #####    | #####    |
| 27 | 1 ES | 2020-13 | 5 ES-Overall | 1 | 4 | #####    | #####    |
| 28 | 1 ES | 2020-13 | 5 ES-Overall | 1 | 5 | #####    | #####    |
| 29 | 1 ES | 2020-13 | 5 ES-Overall | 2 | 1 | #####    | #####    |
| 30 | 1 ES | 2020-13 | 5 ES-Overall | 2 | 2 | #####    | #####    |
| 31 | 1 ES | 2020-13 | 5 ES-Overall | 2 | 3 | #####    | #####    |
| 32 | 1 ES | 2020-13 | 5 ES-Overall | 2 | 4 | #####    | #####    |
| 33 | 1 ES | 2020-13 | 5 ES-Overall | 2 | 5 | #####    | #####    |
| 34 | 1 ES | 2020-13 | 5 ES-Overall | 3 | 1 | #####    | #####    |
| 35 | 1 ES | 2020-13 | 5 ES-Overall | 3 | 2 | #####    | #####    |
| 36 | 1 ES | 2020-13 | 5 ES-Overall | 3 | 3 | #####    | #####    |
| 37 | 1 ES | 2020-13 | 5 ES-Overall | 3 | 4 | #####    | #####    |
| 38 | 1 ES | 2020-13 | 5 ES-Overall | 3 | 5 | #####    | #####    |
| 39 | 1 ES | 2020-13 | 5 ES-South   | 1 | 1 | #####    | #####    |
| 40 | 1 ES | 2020-13 | 5 ES-South   | 1 | 2 | #####    | #####    |
| 41 | 1 ES | 2020-13 | 5 ES-South   | 1 | 3 | #####    | #####    |
| 42 | 1 ES | 2020-13 | 5 ES-South   | 1 | 4 | #####    | #####    |
| 43 | 1 ES | 2020-13 | 5 ES-South   | 1 | 5 | #####    | #####    |
| 44 | 1 ES | 2020-13 | 5 ES-South   | 2 | 1 | #####    | #####    |
| 45 | 1 ES | 2020-13 | 5 ES-South   | 2 | 2 | #####    | #####    |
| 46 | 1 ES | 2020-13 | 5 ES-South   | 2 | 3 | #####    | #####    |
| 47 | 1 ES | 2020-13 | 5 ES-South   | 2 | 4 | #####    | #####    |
| 48 | 1 ES | 2020-13 | 5 ES-South   | 2 | 5 | #####    | #####    |
| 49 | 1 ES | 2020-13 | 5 ES-South   | 3 | 1 | #####    | #####    |
| 50 | 1 ES | 2020-13 | 5 ES-South   | 3 | 2 | 0        | 0        |
| 51 | 1 ES | 2020-13 | 5 ES-South   | 3 | 3 | 0        | 0        |
| 52 | 1 ES | 2020-13 | 5 ES-South   | 3 | 4 | 1.076923 | #####    |
| 53 | 1 ES | 2020-13 | 5 ES-South   | 3 | 5 | 1.190476 | #####    |
| 54 | 1 ES | 2020-14 | 1 ES-Center  | 1 | 1 | 3.075796 | #####    |
| 55 | 1 ES | 2020-14 | 1 ES-Center  | 1 | 2 | 5.489924 | 1.66927  |
| 56 | 1 ES | 2020-14 | 1 ES-Center  | 1 | 3 | 2.701097 | #####    |
| 57 | 1 ES | 2020-14 | 1 ES-Center  | 1 | 4 | 3.990115 | #####    |
| 58 | 1 ES | 2020-14 | 1 ES-Center  | 1 | 5 | #####    | #####    |
| 59 | 1 ES | 2020-14 | 1 ES-Center  | 2 | 1 | 2.488054 | #####    |
| 60 | 1 ES | 2020-14 | 1 ES-Center  | 2 | 1 | 2.488054 | #####    |

|    |      |         |             |   |   |          |          |
|----|------|---------|-------------|---|---|----------|----------|
| 1  |      |         |             |   |   |          |          |
| 2  |      |         |             |   |   |          |          |
| 3  | 1 ES | 2020-14 | 1 ES-Center | 2 | 2 | 4.478261 | 1.187425 |
| 4  | 1 ES | 2020-14 | 1 ES-Center | 2 | 3 | 2.616667 | #####    |
| 5  | 1 ES | 2020-14 | 1 ES-Center | 2 | 4 | 3.361702 | #####    |
| 6  | 1 ES | 2020-14 | 1 ES-Center | 2 | 5 | #####    | #####    |
| 7  | 1 ES | 2020-14 | 1 ES-Center | 3 | 1 | 3.889267 | #####    |
| 8  | 1 ES | 2020-14 | 1 ES-Center | 3 | 2 | 7        | 3.674577 |
| 9  | 1 ES | 2020-14 | 1 ES-Center | 3 | 3 | 2.769231 | #####    |
| 10 | 1 ES | 2020-14 | 1 ES-Center | 3 | 4 | 4.6875   | 1.47312  |
| 11 | 1 ES | 2020-14 | 1 ES-Center | 3 | 5 | 1.75     | #####    |
| 12 | 1 ES | 2020-14 | 1 ES-East   | 1 | 1 | 3.632647 | #####    |
| 13 | 1 ES | 2020-14 | 1 ES-East   | 1 | 2 | 4.809518 | #####    |
| 14 | 1 ES | 2020-14 | 1 ES-East   | 1 | 3 | 4.141451 | #####    |
| 15 | 1 ES | 2020-14 | 1 ES-East   | 1 | 4 | 3.773672 | #####    |
| 16 | 1 ES | 2020-14 | 1 ES-East   | 1 | 5 | 1.952583 | #####    |
| 17 | 1 ES | 2020-14 | 1 ES-East   | 2 | 1 | 3.327631 | #####    |
| 18 | 1 ES | 2020-14 | 1 ES-East   | 2 | 2 | 4.583333 | #####    |
| 19 | 1 ES | 2020-14 | 1 ES-East   | 2 | 3 | 4.152381 | #####    |
| 20 | 1 ES | 2020-14 | 1 ES-East   | 2 | 4 | 3.229167 | #####    |
| 21 | 1 ES | 2020-14 | 1 ES-East   | 2 | 5 | 1.872727 | #####    |
| 22 | 1 ES | 2020-14 | 1 ES-East   | 3 | 1 | 3.999054 | #####    |
| 23 | 1 ES | 2020-14 | 1 ES-East   | 3 | 2 | 5        | 1.342686 |
| 24 | 1 ES | 2020-14 | 1 ES-East   | 3 | 3 | 4.125    | 1.233996 |
| 25 | 1 ES | 2020-14 | 1 ES-East   | 3 | 4 | 4.241379 | #####    |
| 26 | 1 ES | 2020-14 | 1 ES-East   | 3 | 5 | 2.107143 | #####    |
| 27 | 1 ES | 2020-14 | 1 ES-Island | 1 | 1 | 3.00507  | #####    |
| 28 | 1 ES | 2020-14 | 1 ES-Island | 1 | 2 | 4.005779 | #####    |
| 29 | 1 ES | 2020-14 | 1 ES-Island | 1 | 3 | 3.057954 | #####    |
| 30 | 1 ES | 2020-14 | 1 ES-Island | 1 | 4 | 3.126384 | #####    |
| 31 | 1 ES | 2020-14 | 1 ES-Island | 1 | 5 | 1.80052  | #####    |
| 32 | 1 ES | 2020-14 | 1 ES-Island | 2 | 1 | 3.241592 | #####    |
| 33 | 1 ES | 2020-14 | 1 ES-Island | 2 | 2 | 3.181818 | #####    |
| 34 | 1 ES | 2020-14 | 1 ES-Island | 2 | 3 | 2.976744 | #####    |
| 35 | 1 ES | 2020-14 | 1 ES-Island | 2 | 4 | 3.964912 | #####    |
| 36 | 1 ES | 2020-14 | 1 ES-Island | 2 | 5 | 2.153846 | #####    |
| 37 | 1 ES | 2020-14 | 1 ES-Island | 3 | 1 | 2.696084 | #####    |
| 38 | 1 ES | 2020-14 | 1 ES-Island | 3 | 2 | 6        | 8.88E-16 |
| 39 | 1 ES | 2020-14 | 1 ES-Island | 3 | 3 | 3.153846 | 1.103332 |
| 40 | 1 ES | 2020-14 | 1 ES-Island | 3 | 4 | 2.090909 | #####    |
| 41 | 1 ES | 2020-14 | 1 ES-Island | 3 | 5 | 1.333333 | #####    |
| 42 | 1 ES | 2020-14 | 1 ES-Madrid | 1 | 1 | 3.819195 | #####    |
| 43 | 1 ES | 2020-14 | 1 ES-Madrid | 1 | 2 | 5.960409 | 2.317932 |
| 44 | 1 ES | 2020-14 | 1 ES-Madrid | 1 | 3 | 4.521113 | #####    |
| 45 | 1 ES | 2020-14 | 1 ES-Madrid | 1 | 4 | 2.553344 | #####    |
| 46 | 1 ES | 2020-14 | 1 ES-Madrid | 1 | 5 | 2.602772 | #####    |
| 47 | 1 ES | 2020-14 | 1 ES-Madrid | 2 | 1 | 2.811883 | #####    |
| 48 | 1 ES | 2020-14 | 1 ES-Madrid | 2 | 2 | 3.869565 | #####    |
| 49 | 1 ES | 2020-14 | 1 ES-Madrid | 2 | 3 | 2.895349 | #####    |
| 50 | 1 ES | 2020-14 | 1 ES-Madrid | 2 | 4 | 3.059701 | #####    |
| 51 | 1 ES | 2020-14 | 1 ES-Madrid | 2 | 5 | 1.5      | #####    |
| 52 | 1 ES | 2020-14 | 1 ES-Madrid | 3 | 1 | 5.003942 | 1.092264 |
| 53 | 1 ES | 2020-14 | 1 ES-Madrid | 3 | 2 | 8.8      | 5.195867 |
| 54 | 1 ES | 2020-14 | 1 ES-Madrid | 3 | 3 | 6.142857 | 1.481928 |
| 55 | 1 ES | 2020-14 | 1 ES-Madrid | 3 | 4 | 2        | #####    |
| 56 | 1 ES | 2020-14 | 1 ES-Madrid | 3 | 5 | 4.375    | 2.462246 |
| 57 | 1 ES | 2020-14 | 1 ES-Northe | 1 | 1 | 3.159627 | #####    |
| 58 | 1 ES | 2020-14 | 1 ES-Northe | 1 | 2 | 3.143766 | #####    |
| 59 | 1 ES | 2020-14 | 1 ES-Northe | 1 | 2 | 3.143766 | #####    |
| 60 | 1 ES | 2020-14 | 1 ES-Northe | 1 | 2 | 3.143766 | #####    |



|    |      |         |              |   |   |          |          |  |
|----|------|---------|--------------|---|---|----------|----------|--|
| 1  |      |         |              |   |   |          |          |  |
| 2  |      |         |              |   |   |          |          |  |
| 3  | 1 ES | 2020-14 | 1 ES-Northea | 1 | 3 | 2.835075 | #####    |  |
| 4  | 1 ES | 2020-14 | 1 ES-Northea | 1 | 4 | 3.87755  | #####    |  |
| 5  | 1 ES | 2020-14 | 1 ES-Northea | 1 | 5 | 2.396059 | #####    |  |
| 6  | 1 ES | 2020-14 | 1 ES-Northea | 2 | 1 | 3.244576 | #####    |  |
| 7  | 1 ES | 2020-14 | 1 ES-Northea | 2 | 2 | 3.5      | #####    |  |
| 8  | 1 ES | 2020-14 | 1 ES-Northea | 2 | 3 | 3.458333 | #####    |  |
| 9  | 1 ES | 2020-14 | 1 ES-Northea | 2 | 4 | 3.686275 | #####    |  |
| 10 | 1 ES | 2020-14 | 1 ES-Northea | 2 | 5 | 2.111111 | #####    |  |
| 11 | 1 ES | 2020-14 | 1 ES-Northea | 3 | 1 | 3.06592  | #####    |  |
| 12 | 1 ES | 2020-14 | 1 ES-Northea | 3 | 2 | 2.5      | 1.060759 |  |
| 13 | 1 ES | 2020-14 | 1 ES-Northea | 3 | 3 | 2.266667 | #####    |  |
| 14 | 1 ES | 2020-14 | 1 ES-Northea | 3 | 4 | 4.060606 | #####    |  |
| 15 | 1 ES | 2020-14 | 1 ES-Northea | 3 | 5 | 2.777778 | #####    |  |
| 16 | 1 ES | 2020-14 | 1 ES-Northw  | 1 | 1 | 3.610188 | #####    |  |
| 17 | 1 ES | 2020-14 | 1 ES-Northw  | 1 | 2 | 4.064139 | #####    |  |
| 18 | 1 ES | 2020-14 | 1 ES-Northw  | 1 | 3 | 4.013622 | #####    |  |
| 19 | 1 ES | 2020-14 | 1 ES-Northw  | 1 | 4 | 4.220974 | #####    |  |
| 20 | 1 ES | 2020-14 | 1 ES-Northw  | 1 | 5 | 1.951385 | #####    |  |
| 21 | 1 ES | 2020-14 | 1 ES-Northw  | 2 | 1 | 3.845319 | #####    |  |
| 22 | 1 ES | 2020-14 | 1 ES-Northw  | 2 | 2 | 5.285714 | 1.178415 |  |
| 23 | 1 ES | 2020-14 | 1 ES-Northw  | 2 | 3 | 3.890411 | #####    |  |
| 24 | 1 ES | 2020-14 | 1 ES-Northw  | 2 | 4 | 5.046875 | #####    |  |
| 25 | 1 ES | 2020-14 | 1 ES-Northw  | 2 | 5 | 1.333333 | #####    |  |
| 26 | 1 ES | 2020-14 | 1 ES-Northw  | 3 | 1 | 3.365643 | #####    |  |
| 27 | 1 ES | 2020-14 | 1 ES-Northw  | 3 | 2 | 2        | #####    |  |
| 28 | 1 ES | 2020-14 | 1 ES-Northw  | 3 | 3 | 4.130435 | #####    |  |
| 29 | 1 ES | 2020-14 | 1 ES-Northw  | 3 | 4 | 3.454545 | #####    |  |
| 30 | 1 ES | 2020-14 | 1 ES-Northw  | 3 | 5 | 2.625    | #####    |  |
| 31 | 1 ES | 2020-14 | 1 ES-Overall | 1 | 1 | 3.527142 | #####    |  |
| 32 | 1 ES | 2020-14 | 1 ES-Overall | 1 | 2 | 4.305297 | #####    |  |
| 33 | 1 ES | 2020-14 | 1 ES-Overall | 1 | 3 | 3.969829 | #####    |  |
| 34 | 1 ES | 2020-14 | 1 ES-Overall | 1 | 4 | 3.765598 | #####    |  |
| 35 | 1 ES | 2020-14 | 1 ES-Overall | 1 | 5 | 1.879985 | #####    |  |
| 36 | 1 ES | 2020-14 | 1 ES-Overall | 2 | 1 | 3.190463 | #####    |  |
| 37 | 1 ES | 2020-14 | 1 ES-Overall | 2 | 2 | 3.969959 | #####    |  |
| 38 | 1 ES | 2020-14 | 1 ES-Overall | 2 | 3 | 3.611428 | #####    |  |
| 39 | 1 ES | 2020-14 | 1 ES-Overall | 2 | 4 | 3.723819 | #####    |  |
| 40 | 1 ES | 2020-14 | 1 ES-Overall | 2 | 5 | 1.538711 | #####    |  |
| 41 | 1 ES | 2020-14 | 1 ES-Overall | 3 | 1 | 3.924261 | #####    |  |
| 42 | 1 ES | 2020-14 | 1 ES-Overall | 3 | 2 | 4.687988 | 1.00977  |  |
| 43 | 1 ES | 2020-14 | 1 ES-Overall | 3 | 3 | 4.350448 | #####    |  |
| 44 | 1 ES | 2020-14 | 1 ES-Overall | 3 | 4 | 3.808481 | #####    |  |
| 45 | 1 ES | 2020-14 | 1 ES-Overall | 3 | 5 | 2.485983 | #####    |  |
| 46 | 1 ES | 2020-14 | 1 ES-South   | 1 | 1 | 3.692484 | #####    |  |
| 47 | 1 ES | 2020-14 | 1 ES-South   | 1 | 2 | 2.602041 | #####    |  |
| 48 | 1 ES | 2020-14 | 1 ES-South   | 1 | 3 | 4.678029 | #####    |  |
| 49 | 1 ES | 2020-14 | 1 ES-South   | 1 | 4 | 4.421728 | #####    |  |
| 50 | 1 ES | 2020-14 | 1 ES-South   | 1 | 5 | 1.651591 | #####    |  |
| 51 | 1 ES | 2020-14 | 1 ES-South   | 2 | 1 | 3.312746 | #####    |  |
| 52 | 1 ES | 2020-14 | 1 ES-South   | 2 | 2 | 2.823529 | #####    |  |
| 53 | 1 ES | 2020-14 | 1 ES-South   | 2 | 3 | 4        | #####    |  |
| 54 | 1 ES | 2020-14 | 1 ES-South   | 2 | 4 | 4.2      | 1.141105 |  |
| 55 | 1 ES | 2020-14 | 1 ES-South   | 2 | 5 | 1.4      | #####    |  |
| 56 | 1 ES | 2020-14 | 1 ES-South   | 3 | 1 | 4.120604 | #####    |  |
| 57 | 1 ES | 2020-14 | 1 ES-South   | 3 | 2 | 2.4      | #####    |  |
| 58 | 1 ES | 2020-14 | 1 ES-South   | 3 | 3 | 5.333333 | 1.713564 |  |
| 59 | 1 ES | 2020-14 | 1 ES-South   | 3 |   |          |          |  |
| 60 | 1 ES | 2020-14 | 1 ES-South   | 3 |   |          |          |  |

|    |      |         |             |   |   |          |          |  |
|----|------|---------|-------------|---|---|----------|----------|--|
| 1  |      |         |             |   |   |          |          |  |
| 2  |      |         |             |   |   |          |          |  |
| 3  | 1 ES | 2020-14 | 1 ES-South  | 3 | 4 | 4.7      | 1.099749 |  |
| 4  | 1 ES | 2020-14 | 1 ES-South  | 3 | 5 | 2.058824 | #####    |  |
| 5  | 1 ES | 2020-14 | 2 ES-Center | 1 | 1 | 1.726185 | #####    |  |
| 6  | 1 ES | 2020-14 | 2 ES-Center | 1 | 2 | 2.111841 | #####    |  |
| 7  | 1 ES | 2020-14 | 2 ES-Center | 1 | 3 | 1.890676 | #####    |  |
| 8  | 1 ES | 2020-14 | 2 ES-Center | 1 | 4 | 2.163403 | #####    |  |
| 9  | 1 ES | 2020-14 | 2 ES-Center | 1 | 5 | #####    | #####    |  |
| 10 | 1 ES | 2020-14 | 2 ES-Center | 2 | 1 | 1.521369 | #####    |  |
| 11 | 1 ES | 2020-14 | 2 ES-Center | 2 | 2 | 2.521739 | #####    |  |
| 12 | 1 ES | 2020-14 | 2 ES-Center | 2 | 3 | 1.8      | #####    |  |
| 13 | 1 ES | 2020-14 | 2 ES-Center | 2 | 4 | 1.645833 | #####    |  |
| 14 | 1 ES | 2020-14 | 2 ES-Center | 2 | 5 | #####    | #####    |  |
| 15 | 1 ES | 2020-14 | 2 ES-Center | 3 | 1 | 2.007533 | #####    |  |
| 16 | 1 ES | 2020-14 | 2 ES-Center | 3 | 2 | 1.5      | #####    |  |
| 17 | 1 ES | 2020-14 | 2 ES-Center | 3 | 3 | 1.964286 | #####    |  |
| 18 | 1 ES | 2020-14 | 2 ES-Center | 3 | 4 | 2.75     | 1.273341 |  |
| 19 | 1 ES | 2020-14 | 2 ES-Center | 3 | 5 | 0.75     | #####    |  |
| 20 | 1 ES | 2020-14 | 2 ES-East   | 1 | 1 | 1.868868 | #####    |  |
| 21 | 1 ES | 2020-14 | 2 ES-East   | 1 | 2 | 2.508662 | #####    |  |
| 22 | 1 ES | 2020-14 | 2 ES-East   | 1 | 3 | 1.804629 | #####    |  |
| 23 | 1 ES | 2020-14 | 2 ES-East   | 1 | 4 | 1.975467 | #####    |  |
| 24 | 1 ES | 2020-14 | 2 ES-East   | 1 | 5 | 1.277865 | #####    |  |
| 25 | 1 ES | 2020-14 | 2 ES-East   | 2 | 1 | 1.739602 | #####    |  |
| 26 | 1 ES | 2020-14 | 2 ES-East   | 2 | 2 | 2.153846 | #####    |  |
| 27 | 1 ES | 2020-14 | 2 ES-East   | 2 | 3 | 1.86087  | #####    |  |
| 28 | 1 ES | 2020-14 | 2 ES-East   | 2 | 4 | 1.908163 | #####    |  |
| 29 | 1 ES | 2020-14 | 2 ES-East   | 2 | 5 | 1.2      | #####    |  |
| 30 | 1 ES | 2020-14 | 2 ES-East   | 3 | 1 | 2.023122 | #####    |  |
| 31 | 1 ES | 2020-14 | 2 ES-East   | 3 | 2 | 2.8      | #####    |  |
| 32 | 1 ES | 2020-14 | 2 ES-East   | 3 | 3 | 1.722222 | #####    |  |
| 33 | 1 ES | 2020-14 | 2 ES-East   | 3 | 4 | 2.034483 | #####    |  |
| 34 | 1 ES | 2020-14 | 2 ES-East   | 3 | 5 | 1.428571 | #####    |  |
| 35 | 1 ES | 2020-14 | 2 ES-Island | 1 | 1 | 1.68225  | #####    |  |
| 36 | 1 ES | 2020-14 | 2 ES-Island | 1 | 2 | 3.68413  | #####    |  |
| 37 | 1 ES | 2020-14 | 2 ES-Island | 1 | 3 | 1.52725  | #####    |  |
| 38 | 1 ES | 2020-14 | 2 ES-Island | 1 | 4 | 1.461119 | #####    |  |
| 39 | 1 ES | 2020-14 | 2 ES-Island | 1 | 5 | 1.26684  | #####    |  |
| 40 | 1 ES | 2020-14 | 2 ES-Island | 2 | 1 | 1.802592 | #####    |  |
| 41 | 1 ES | 2020-14 | 2 ES-Island | 2 | 2 | 2.727273 | #####    |  |
| 42 | 1 ES | 2020-14 | 2 ES-Island | 2 | 3 | 1.8      | #####    |  |
| 43 | 1 ES | 2020-14 | 2 ES-Island | 2 | 4 | 1.644068 | 0.216761 |  |
| 44 | 1 ES | 2020-14 | 2 ES-Island | 2 | 5 | 1.384615 | #####    |  |
| 45 | 1 ES | 2020-14 | 2 ES-Island | 3 | 1 | 1.525325 | #####    |  |
| 46 | 1 ES | 2020-14 | 2 ES-Island | 3 | 2 | 6        | 8.88E-16 |  |
| 47 | 1 ES | 2020-14 | 2 ES-Island | 3 | 3 | 1.214286 | #####    |  |
| 48 | 1 ES | 2020-14 | 2 ES-Island | 3 | 4 | 1.227273 | #####    |  |
| 49 | 1 ES | 2020-14 | 2 ES-Island | 3 | 5 | 1.111111 | #####    |  |
| 50 | 1 ES | 2020-14 | 2 ES-Madrid | 1 | 1 | 1.7501   | #####    |  |
| 51 | 1 ES | 2020-14 | 2 ES-Madrid | 1 | 2 | 2.655089 | #####    |  |
| 52 | 1 ES | 2020-14 | 2 ES-Madrid | 1 | 3 | 1.655626 | #####    |  |
| 53 | 1 ES | 2020-14 | 2 ES-Madrid | 1 | 4 | 1.603515 | #####    |  |
| 54 | 1 ES | 2020-14 | 2 ES-Madrid | 1 | 5 | 1.391362 | #####    |  |
| 55 | 1 ES | 2020-14 | 2 ES-Madrid | 2 | 1 | 1.685687 | #####    |  |
| 56 | 1 ES | 2020-14 | 2 ES-Madrid | 2 | 2 | 2.695652 | #####    |  |
| 57 | 1 ES | 2020-14 | 2 ES-Madrid | 2 | 3 | 1.769231 | #####    |  |
| 58 | 1 ES | 2020-14 | 2 ES-Madrid | 2 | 4 | 1.625    | #####    |  |
| 59 | 1 ES | 2020-14 | 2 ES-Madrid | 2 |   |          |          |  |
| 60 | 1 ES | 2020-14 | 2 ES-Madrid | 2 |   |          |          |  |

|    |      |         |              |   |   |          |          |
|----|------|---------|--------------|---|---|----------|----------|
| 1  |      |         |              |   |   |          |          |
| 2  |      |         |              |   |   |          |          |
| 3  | 1 ES | 2020-14 | 2 ES-Madrid  | 2 | 5 | #####    | #####    |
| 4  | 1 ES | 2020-14 | 2 ES-Madrid  | 3 | 1 | 1.828269 | #####    |
| 5  | 1 ES | 2020-14 | 2 ES-Madrid  | 3 | 2 | 2.6      | #####    |
| 6  | 1 ES | 2020-14 | 2 ES-Madrid  | 3 | 3 | 1.535714 | #####    |
| 7  | 1 ES | 2020-14 | 2 ES-Madrid  | 3 | 4 | 1.578947 | #####    |
| 8  | 1 ES | 2020-14 | 2 ES-Madrid  | 3 | 5 | 2.3125   | 1.223962 |
| 9  | 1 ES | 2020-14 | 2 ES-Northea | 1 | 1 | 1.905207 | #####    |
| 10 | 1 ES | 2020-14 | 2 ES-Northea | 1 | 2 | 2.618866 | #####    |
| 11 | 1 ES | 2020-14 | 2 ES-Northea | 1 | 3 | 1.901588 | #####    |
| 12 | 1 ES | 2020-14 | 2 ES-Northea | 1 | 4 | 2.11037  | #####    |
| 13 | 1 ES | 2020-14 | 2 ES-Northea | 1 | 5 | 1        | #####    |
| 14 | 1 ES | 2020-14 | 2 ES-Northea | 2 | 1 | 2.103076 | #####    |
| 15 | 1 ES | 2020-14 | 2 ES-Northea | 2 | 2 | 2.941176 | #####    |
| 16 | 1 ES | 2020-14 | 2 ES-Northea | 2 | 3 | 2.137255 | #####    |
| 17 | 1 ES | 2020-14 | 2 ES-Northea | 2 | 4 | 2.326923 | #####    |
| 18 | 1 ES | 2020-14 | 2 ES-Northea | 2 | 5 | 1        | #####    |
| 19 | 1 ES | 2020-14 | 2 ES-Northea | 3 | 1 | 1.691477 | #####    |
| 20 | 1 ES | 2020-14 | 2 ES-Northea | 3 | 2 | 2        | 1.414346 |
| 21 | 1 ES | 2020-14 | 2 ES-Northea | 3 | 3 | 1.6875   | #####    |
| 22 | 1 ES | 2020-14 | 2 ES-Northea | 3 | 4 | 1.916667 | #####    |
| 23 | 1 ES | 2020-14 | 2 ES-Northea | 3 | 5 | 1        | #####    |
| 24 | 1 ES | 2020-14 | 2 ES-Northea | 3 | 5 | 1        | #####    |
| 25 | 1 ES | 2020-14 | 2 ES-Northw  | 1 | 1 | 1.956162 | #####    |
| 26 | 1 ES | 2020-14 | 2 ES-Northw  | 1 | 2 | 2.292782 | #####    |
| 27 | 1 ES | 2020-14 | 2 ES-Northw  | 1 | 3 | 2.187876 | #####    |
| 28 | 1 ES | 2020-14 | 2 ES-Northw  | 1 | 4 | 1.844155 | #####    |
| 29 | 1 ES | 2020-14 | 2 ES-Northw  | 1 | 5 | 1.56541  | #####    |
| 30 | 1 ES | 2020-14 | 2 ES-Northw  | 2 | 1 | 1.829508 | #####    |
| 31 | 1 ES | 2020-14 | 2 ES-Northw  | 2 | 2 | 2.52381  | #####    |
| 32 | 1 ES | 2020-14 | 2 ES-Northw  | 2 | 3 | 2.012195 | #####    |
| 33 | 1 ES | 2020-14 | 2 ES-Northw  | 2 | 4 | 1.80303  | #####    |
| 34 | 1 ES | 2020-14 | 2 ES-Northw  | 2 | 5 | 1.166667 | #####    |
| 35 | 1 ES | 2020-14 | 2 ES-Northw  | 3 | 1 | 2.085149 | #####    |
| 36 | 1 ES | 2020-14 | 2 ES-Northw  | 3 | 2 | 2        | #####    |
| 37 | 1 ES | 2020-14 | 2 ES-Northw  | 3 | 3 | 2.36     | #####    |
| 38 | 1 ES | 2020-14 | 2 ES-Northw  | 3 | 4 | 1.882353 | #####    |
| 39 | 1 ES | 2020-14 | 2 ES-Northw  | 3 | 5 | 2        | #####    |
| 40 | 1 ES | 2020-14 | 2 ES-Overall | 1 | 1 | 1.830887 | #####    |
| 41 | 1 ES | 2020-14 | 2 ES-Overall | 1 | 2 | 2.447684 | #####    |
| 42 | 1 ES | 2020-14 | 2 ES-Overall | 1 | 3 | 1.845028 | #####    |
| 43 | 1 ES | 2020-14 | 2 ES-Overall | 1 | 4 | 1.920213 | #####    |
| 44 | 1 ES | 2020-14 | 2 ES-Overall | 1 | 5 | 1.179948 | #####    |
| 45 | 1 ES | 2020-14 | 2 ES-Overall | 2 | 1 | 1.800538 | #####    |
| 46 | 1 ES | 2020-14 | 2 ES-Overall | 2 | 2 | 2.420418 | #####    |
| 47 | 1 ES | 2020-14 | 2 ES-Overall | 2 | 3 | 1.971616 | #####    |
| 48 | 1 ES | 2020-14 | 2 ES-Overall | 2 | 4 | 1.911541 | #####    |
| 49 | 1 ES | 2020-14 | 2 ES-Overall | 2 | 5 | 1.023165 | #####    |
| 50 | 1 ES | 2020-14 | 2 ES-Overall | 3 | 1 | 1.866806 | #####    |
| 51 | 1 ES | 2020-14 | 2 ES-Overall | 3 | 2 | 2.478213 | #####    |
| 52 | 1 ES | 2020-14 | 2 ES-Overall | 3 | 3 | 1.708176 | #####    |
| 53 | 1 ES | 2020-14 | 2 ES-Overall | 3 | 4 | 1.929225 | #####    |
| 54 | 1 ES | 2020-14 | 2 ES-Overall | 3 | 5 | 1.458345 | #####    |
| 55 | 1 ES | 2020-14 | 2 ES-South   | 1 | 1 | 1.839459 | #####    |
| 56 | 1 ES | 2020-14 | 2 ES-South   | 1 | 2 | 2.183623 | #####    |
| 57 | 1 ES | 2020-14 | 2 ES-South   | 1 | 3 | 1.910638 | #####    |
| 58 | 1 ES | 2020-14 | 2 ES-South   | 1 | 4 | 2.074323 | #####    |
| 59 | 1 ES | 2020-14 | 2 ES-South   | 1 | 5 | 1.022463 | #####    |
| 60 | 1 ES | 2020-14 | 2 ES-South   | 1 | 5 | 1.022463 | #####    |

|    |      |         |             |   |   |          |       |  |
|----|------|---------|-------------|---|---|----------|-------|--|
| 1  |      |         |             |   |   |          |       |  |
| 2  |      |         |             |   |   |          |       |  |
| 3  | 1 ES | 2020-14 | 2 ES-South  | 2 | 1 | 1.978688 | ##### |  |
| 4  | 1 ES | 2020-14 | 2 ES-South  | 2 | 2 | 2.166667 | ##### |  |
| 5  | 1 ES | 2020-14 | 2 ES-South  | 2 | 3 | 2.293478 | ##### |  |
| 6  | 1 ES | 2020-14 | 2 ES-South  | 2 | 4 | 2.211268 | ##### |  |
| 7  | 1 ES | 2020-14 | 2 ES-South  | 2 | 5 | 1        | ##### |  |
| 8  | 1 ES | 2020-14 | 2 ES-South  | 3 | 1 | 1.677954 | ##### |  |
| 9  | 1 ES | 2020-14 | 2 ES-South  | 3 | 2 | 2.2      | ##### |  |
| 10 | 1 ES | 2020-14 | 2 ES-South  | 3 | 3 | 1.52381  | ##### |  |
| 11 | 1 ES | 2020-14 | 2 ES-South  | 3 | 4 | 1.9      | ##### |  |
| 12 | 1 ES | 2020-14 | 2 ES-South  | 3 | 5 | 1.058824 | ##### |  |
| 13 | 1 ES | 2020-14 | 3 ES-Center | 1 | 1 | #####    | ##### |  |
| 14 | 1 ES | 2020-14 | 3 ES-Center | 1 | 2 | 0        | 0     |  |
| 15 | 1 ES | 2020-14 | 3 ES-Center | 1 | 3 | #####    | ##### |  |
| 16 | 1 ES | 2020-14 | 3 ES-Center | 1 | 4 | #####    | ##### |  |
| 17 | 1 ES | 2020-14 | 3 ES-Center | 1 | 5 | #####    | ##### |  |
| 18 | 1 ES | 2020-14 | 3 ES-Center | 2 | 1 | #####    | ##### |  |
| 19 | 1 ES | 2020-14 | 3 ES-Center | 2 | 2 | 0        | 0     |  |
| 20 | 1 ES | 2020-14 | 3 ES-Center | 2 | 3 | #####    | ##### |  |
| 21 | 1 ES | 2020-14 | 3 ES-Center | 2 | 4 | 0        | 0     |  |
| 22 | 1 ES | 2020-14 | 3 ES-Center | 2 | 5 | 0        | 0     |  |
| 23 | 1 ES | 2020-14 | 3 ES-Center | 2 | 1 | #####    | ##### |  |
| 24 | 1 ES | 2020-14 | 3 ES-Center | 3 | 2 | 0        | 0     |  |
| 25 | 1 ES | 2020-14 | 3 ES-Center | 3 | 3 | 0        | 0     |  |
| 26 | 1 ES | 2020-14 | 3 ES-Center | 3 | 3 | 0        | 0     |  |
| 27 | 1 ES | 2020-14 | 3 ES-Center | 3 | 4 | 0.125    | ##### |  |
| 28 | 1 ES | 2020-14 | 3 ES-Center | 3 | 5 | 0.25     | ##### |  |
| 29 | 1 ES | 2020-14 | 3 ES-East   | 1 | 1 | #####    | ##### |  |
| 30 | 1 ES | 2020-14 | 3 ES-East   | 1 | 2 | #####    | ##### |  |
| 31 | 1 ES | 2020-14 | 3 ES-East   | 1 | 3 | #####    | ##### |  |
| 32 | 1 ES | 2020-14 | 3 ES-East   | 1 | 4 | #####    | ##### |  |
| 33 | 1 ES | 2020-14 | 3 ES-East   | 1 | 5 | #####    | ##### |  |
| 34 | 1 ES | 2020-14 | 3 ES-East   | 2 | 1 | #####    | ##### |  |
| 35 | 1 ES | 2020-14 | 3 ES-East   | 2 | 2 | #####    | ##### |  |
| 36 | 1 ES | 2020-14 | 3 ES-East   | 2 | 3 | 0        | 0     |  |
| 37 | 1 ES | 2020-14 | 3 ES-East   | 2 | 4 | #####    | ##### |  |
| 38 | 1 ES | 2020-14 | 3 ES-East   | 2 | 5 | #####    | ##### |  |
| 39 | 1 ES | 2020-14 | 3 ES-East   | 3 | 1 | #####    | ##### |  |
| 40 | 1 ES | 2020-14 | 3 ES-East   | 3 | 2 | 0        | 0     |  |
| 41 | 1 ES | 2020-14 | 3 ES-East   | 3 | 3 | #####    | ##### |  |
| 42 | 1 ES | 2020-14 | 3 ES-East   | 3 | 4 | #####    | ##### |  |
| 43 | 1 ES | 2020-14 | 3 ES-East   | 3 | 5 | #####    | ##### |  |
| 44 | 1 ES | 2020-14 | 3 ES-Island | 1 | 1 | #####    | ##### |  |
| 45 | 1 ES | 2020-14 | 3 ES-Island | 1 | 2 | #####    | ##### |  |
| 46 | 1 ES | 2020-14 | 3 ES-Island | 1 | 3 | 0        | 0     |  |
| 47 | 1 ES | 2020-14 | 3 ES-Island | 1 | 4 | #####    | ##### |  |
| 48 | 1 ES | 2020-14 | 3 ES-Island | 1 | 5 | 0        | 0     |  |
| 49 | 1 ES | 2020-14 | 3 ES-Island | 2 | 1 | #####    | ##### |  |
| 50 | 1 ES | 2020-14 | 3 ES-Island | 2 | 2 | #####    | ##### |  |
| 51 | 1 ES | 2020-14 | 3 ES-Island | 2 | 3 | 0        | 0     |  |
| 52 | 1 ES | 2020-14 | 3 ES-Island | 2 | 4 | #####    | ##### |  |
| 53 | 1 ES | 2020-14 | 3 ES-Island | 2 | 5 | 0        | 0     |  |
| 54 | 1 ES | 2020-14 | 3 ES-Island | 3 | 1 | 0        | 0     |  |
| 55 | 1 ES | 2020-14 | 3 ES-Island | 3 | 2 | 0        | 0     |  |
| 56 | 1 ES | 2020-14 | 3 ES-Island | 3 | 3 | 0        | 0     |  |
| 57 | 1 ES | 2020-14 | 3 ES-Island | 3 | 4 | 0        | 0     |  |
| 58 | 1 ES | 2020-14 | 3 ES-Island | 3 | 5 | 0        | 0     |  |
| 59 | 1 ES | 2020-14 | 3 ES-Island | 3 | 5 | 0        | 0     |  |
| 60 | 1 ES | 2020-14 | 3 ES-Madrid | 1 | 1 | #####    | ##### |  |

|    |      |         |              |   |   |        |          |  |
|----|------|---------|--------------|---|---|--------|----------|--|
| 1  |      |         |              |   |   |        |          |  |
| 2  |      |         |              |   |   |        |          |  |
| 3  | 1 ES | 2020-14 | 3 ES-Madrid  | 1 | 2 | 0      | 0        |  |
| 4  | 1 ES | 2020-14 | 3 ES-Madrid  | 1 | 3 | #####  | #####    |  |
| 5  | 1 ES | 2020-14 | 3 ES-Madrid  | 1 | 4 | #####  | #####    |  |
| 6  | 1 ES | 2020-14 | 3 ES-Madrid  | 1 | 5 | #####  | #####    |  |
| 7  | 1 ES | 2020-14 | 3 ES-Madrid  | 2 | 1 | #####  | #####    |  |
| 8  | 1 ES | 2020-14 | 3 ES-Madrid  | 2 | 2 | 0      | 0        |  |
| 9  | 1 ES | 2020-14 | 3 ES-Madrid  | 2 | 3 | 0      | 0        |  |
| 10 | 1 ES | 2020-14 | 3 ES-Madrid  | 2 | 4 | #####  | #####    |  |
| 11 | 1 ES | 2020-14 | 3 ES-Madrid  | 2 | 5 | #####  | #####    |  |
| 12 | 1 ES | 2020-14 | 3 ES-Madrid  | 3 | 1 | #####  | #####    |  |
| 13 | 1 ES | 2020-14 | 3 ES-Madrid  | 3 | 2 | 0      | 0        |  |
| 14 | 1 ES | 2020-14 | 3 ES-Madrid  | 3 | 3 | 0.25   | #####    |  |
| 15 | 1 ES | 2020-14 | 3 ES-Madrid  | 3 | 4 | 0      | 0        |  |
| 16 | 1 ES | 2020-14 | 3 ES-Madrid  | 3 | 5 | 1.1875 | 1.149899 |  |
| 17 | 1 ES | 2020-14 | 3 ES-Northea | 1 | 1 | #####  | #####    |  |
| 18 | 1 ES | 2020-14 | 3 ES-Northea | 1 | 2 | 0      | 0        |  |
| 19 | 1 ES | 2020-14 | 3 ES-Northea | 1 | 3 | 0      | 0        |  |
| 20 | 1 ES | 2020-14 | 3 ES-Northea | 1 | 4 | #####  | #####    |  |
| 21 | 1 ES | 2020-14 | 3 ES-Northea | 1 | 5 | #####  | #####    |  |
| 22 | 1 ES | 2020-14 | 3 ES-Northea | 2 | 1 | #####  | #####    |  |
| 23 | 1 ES | 2020-14 | 3 ES-Northea | 2 | 2 | 0      | 0        |  |
| 24 | 1 ES | 2020-14 | 3 ES-Northea | 2 | 3 | 0      | 0        |  |
| 25 | 1 ES | 2020-14 | 3 ES-Northea | 2 | 4 | #####  | #####    |  |
| 26 | 1 ES | 2020-14 | 3 ES-Northea | 2 | 5 | #####  | #####    |  |
| 27 | 1 ES | 2020-14 | 3 ES-Northea | 3 | 1 | #####  | #####    |  |
| 28 | 1 ES | 2020-14 | 3 ES-Northea | 3 | 2 | 0      | 0        |  |
| 29 | 1 ES | 2020-14 | 3 ES-Northea | 3 | 3 | 0      | 0        |  |
| 30 | 1 ES | 2020-14 | 3 ES-Northea | 3 | 4 | #####  | #####    |  |
| 31 | 1 ES | 2020-14 | 3 ES-Northea | 3 | 5 | 0      | 0        |  |
| 32 | 1 ES | 2020-14 | 3 ES-Northea | 3 | 1 | #####  | #####    |  |
| 33 | 1 ES | 2020-14 | 3 ES-Northea | 3 | 2 | #####  | #####    |  |
| 34 | 1 ES | 2020-14 | 3 ES-Northea | 1 | 3 | 0      | 0        |  |
| 35 | 1 ES | 2020-14 | 3 ES-Northea | 1 | 4 | 0      | 0        |  |
| 36 | 1 ES | 2020-14 | 3 ES-Northea | 1 | 5 | #####  | #####    |  |
| 37 | 1 ES | 2020-14 | 3 ES-Northea | 2 | 1 | #####  | #####    |  |
| 38 | 1 ES | 2020-14 | 3 ES-Northea | 2 | 2 | #####  | #####    |  |
| 39 | 1 ES | 2020-14 | 3 ES-Northea | 2 | 3 | 0      | 0        |  |
| 40 | 1 ES | 2020-14 | 3 ES-Northea | 2 | 4 | 0      | 0        |  |
| 41 | 1 ES | 2020-14 | 3 ES-Northea | 2 | 5 | 0      | 0        |  |
| 42 | 1 ES | 2020-14 | 3 ES-Northea | 3 | 1 | #####  | #####    |  |
| 43 | 1 ES | 2020-14 | 3 ES-Northea | 3 | 2 | 0      | 0        |  |
| 44 | 1 ES | 2020-14 | 3 ES-Northea | 3 | 3 | 0      | 0        |  |
| 45 | 1 ES | 2020-14 | 3 ES-Northea | 3 | 4 | 0      | 0        |  |
| 46 | 1 ES | 2020-14 | 3 ES-Northea | 3 | 5 | 0.125  | #####    |  |
| 47 | 1 ES | 2020-14 | 3 ES-Overall | 1 | 1 | #####  | #####    |  |
| 48 | 1 ES | 2020-14 | 3 ES-Overall | 1 | 2 | #####  | #####    |  |
| 49 | 1 ES | 2020-14 | 3 ES-Overall | 1 | 3 | #####  | #####    |  |
| 50 | 1 ES | 2020-14 | 3 ES-Overall | 1 | 4 | #####  | #####    |  |
| 51 | 1 ES | 2020-14 | 3 ES-Overall | 1 | 5 | #####  | #####    |  |
| 52 | 1 ES | 2020-14 | 3 ES-Overall | 2 | 1 | #####  | #####    |  |
| 53 | 1 ES | 2020-14 | 3 ES-Overall | 2 | 2 | #####  | #####    |  |
| 54 | 1 ES | 2020-14 | 3 ES-Overall | 2 | 3 | #####  | #####    |  |
| 55 | 1 ES | 2020-14 | 3 ES-Overall | 2 | 4 | #####  | #####    |  |
| 56 | 1 ES | 2020-14 | 3 ES-Overall | 2 | 5 | #####  | #####    |  |
| 57 | 1 ES | 2020-14 | 3 ES-Overall | 3 | 1 | #####  | #####    |  |
| 58 | 1 ES | 2020-14 | 3 ES-Overall | 3 | 2 | 0      | 0        |  |
| 59 | 1 ES | 2020-14 | 3 ES-Overall | 3 | 3 | 0      | 0        |  |
| 60 | 1 ES | 2020-14 | 3 ES-Overall | 3 | 4 | 0      | 0        |  |

|    |      |         |              |   |   |          |          |  |
|----|------|---------|--------------|---|---|----------|----------|--|
| 1  |      |         |              |   |   |          |          |  |
| 2  |      |         |              |   |   |          |          |  |
| 3  | 1 ES | 2020-14 | 3 ES-Overall | 3 | 3 | #####    | #####    |  |
| 4  | 1 ES | 2020-14 | 3 ES-Overall | 3 | 4 | #####    | #####    |  |
| 5  | 1 ES | 2020-14 | 3 ES-Overall | 3 | 5 | #####    | #####    |  |
| 6  | 1 ES | 2020-14 | 3 ES-South   | 1 | 1 | #####    | #####    |  |
| 7  | 1 ES | 2020-14 | 3 ES-South   | 1 | 2 | 0        | 0        |  |
| 8  | 1 ES | 2020-14 | 3 ES-South   | 1 | 3 | #####    | #####    |  |
| 9  | 1 ES | 2020-14 | 3 ES-South   | 1 | 4 | #####    | #####    |  |
| 10 | 1 ES | 2020-14 | 3 ES-South   | 1 | 5 | #####    | #####    |  |
| 11 | 1 ES | 2020-14 | 3 ES-South   | 2 | 1 | #####    | #####    |  |
| 12 | 1 ES | 2020-14 | 3 ES-South   | 2 | 2 | 0        | 0        |  |
| 13 | 1 ES | 2020-14 | 3 ES-South   | 2 | 3 | #####    | #####    |  |
| 14 | 1 ES | 2020-14 | 3 ES-South   | 2 | 4 | #####    | #####    |  |
| 15 | 1 ES | 2020-14 | 3 ES-South   | 2 | 5 | 0.04     | #####    |  |
| 16 | 1 ES | 2020-14 | 3 ES-South   | 3 | 1 | #####    | #####    |  |
| 17 | 1 ES | 2020-14 | 3 ES-South   | 3 | 2 | 0        | 0        |  |
| 18 | 1 ES | 2020-14 | 3 ES-South   | 3 | 3 | #####    | #####    |  |
| 19 | 1 ES | 2020-14 | 3 ES-South   | 3 | 4 | #####    | #####    |  |
| 20 | 1 ES | 2020-14 | 3 ES-South   | 3 | 5 | 0        | 0        |  |
| 21 | 1 ES | 2020-14 | 4 ES-Center  | 1 | 1 | #####    | #####    |  |
| 22 | 1 ES | 2020-14 | 4 ES-Center  | 1 | 2 | 1.865972 | 1.048417 |  |
| 23 | 1 ES | 2020-14 | 4 ES-Center  | 1 | 3 | #####    | #####    |  |
| 24 | 1 ES | 2020-14 | 4 ES-Center  | 1 | 4 | 1.074221 | #####    |  |
| 25 | 1 ES | 2020-14 | 4 ES-Center  | 1 | 5 | 0        | 0        |  |
| 26 | 1 ES | 2020-14 | 4 ES-Center  | 2 | 1 | #####    | #####    |  |
| 27 | 1 ES | 2020-14 | 4 ES-Center  | 2 | 2 | 1.608696 | 1.158196 |  |
| 28 | 1 ES | 2020-14 | 4 ES-Center  | 2 | 3 | 0.25     | #####    |  |
| 29 | 1 ES | 2020-14 | 4 ES-Center  | 2 | 4 | 1.25     | #####    |  |
| 30 | 1 ES | 2020-14 | 4 ES-Center  | 2 | 5 | 0        | 0        |  |
| 31 | 1 ES | 2020-14 | 4 ES-Center  | 3 | 1 | #####    | #####    |  |
| 32 | 1 ES | 2020-14 | 4 ES-Center  | 3 | 2 | 2.25     | 1.948739 |  |
| 33 | 1 ES | 2020-14 | 4 ES-Center  | 3 | 3 | #####    | #####    |  |
| 34 | 1 ES | 2020-14 | 4 ES-Center  | 3 | 4 | 0.875    | #####    |  |
| 35 | 1 ES | 2020-14 | 4 ES-Center  | 3 | 5 | 0        | 0        |  |
| 36 | 1 ES | 2020-14 | 4 ES-East    | 1 | 1 | #####    | #####    |  |
| 37 | 1 ES | 2020-14 | 4 ES-East    | 1 | 2 | 1.635513 | #####    |  |
| 38 | 1 ES | 2020-14 | 4 ES-East    | 1 | 3 | 1.659764 | #####    |  |
| 39 | 1 ES | 2020-14 | 4 ES-East    | 1 | 4 | #####    | #####    |  |
| 40 | 1 ES | 2020-14 | 4 ES-East    | 1 | 5 | #####    | #####    |  |
| 41 | 1 ES | 2020-14 | 4 ES-East    | 2 | 1 | #####    | #####    |  |
| 42 | 1 ES | 2020-14 | 4 ES-East    | 2 | 2 | 1.6      | #####    |  |
| 43 | 1 ES | 2020-14 | 4 ES-East    | 2 | 3 | 1.641509 | #####    |  |
| 44 | 1 ES | 2020-14 | 4 ES-East    | 2 | 4 | 0.34375  | #####    |  |
| 45 | 1 ES | 2020-14 | 4 ES-East    | 2 | 5 | #####    | #####    |  |
| 46 | 1 ES | 2020-14 | 4 ES-East    | 3 | 1 | 1.158129 | #####    |  |
| 47 | 1 ES | 2020-14 | 4 ES-East    | 3 | 2 | 1.666667 | 1.571495 |  |
| 48 | 1 ES | 2020-14 | 4 ES-East    | 3 | 3 | 1.6875   | 1.204657 |  |
| 49 | 1 ES | 2020-14 | 4 ES-East    | 3 | 4 | 1.068966 | #####    |  |
| 50 | 1 ES | 2020-14 | 4 ES-East    | 3 | 5 | 0        | 0        |  |
| 51 | 1 ES | 2020-14 | 4 ES-Island  | 1 | 1 | #####    | #####    |  |
| 52 | 1 ES | 2020-14 | 4 ES-Island  | 1 | 2 | 0        | 0        |  |
| 53 | 1 ES | 2020-14 | 4 ES-Island  | 1 | 3 | 1.049898 | #####    |  |
| 54 | 1 ES | 2020-14 | 4 ES-Island  | 1 | 4 | #####    | #####    |  |
| 55 | 1 ES | 2020-14 | 4 ES-Island  | 1 | 5 | #####    | #####    |  |
| 56 | 1 ES | 2020-14 | 4 ES-Island  | 2 | 1 | #####    | #####    |  |
| 57 | 1 ES | 2020-14 | 4 ES-Island  | 2 | 2 | 0        | 0        |  |
| 58 | 1 ES | 2020-14 | 4 ES-Island  | 2 | 3 | #####    | #####    |  |
| 59 | 1 ES | 2020-14 | 4 ES-Island  | 2 | 3 | #####    | #####    |  |
| 60 | 1 ES | 2020-14 | 4 ES-Island  | 2 | 3 | #####    | #####    |  |

|    |      |         |              |   |   |          |          |  |
|----|------|---------|--------------|---|---|----------|----------|--|
| 1  |      |         |              |   |   |          |          |  |
| 2  |      |         |              |   |   |          |          |  |
| 3  | 1 ES | 2020-14 | 4 ES-Island  | 2 | 4 | #####    | #####    |  |
| 4  | 1 ES | 2020-14 | 4 ES-Island  | 2 | 5 | #####    | #####    |  |
| 5  | 1 ES | 2020-14 | 4 ES-Island  | 3 | 1 | #####    | #####    |  |
| 6  | 1 ES | 2020-14 | 4 ES-Island  | 3 | 2 | 0        | 0        |  |
| 7  | 1 ES | 2020-14 | 4 ES-Island  | 3 | 3 | 1.769231 | 1.077869 |  |
| 8  | 1 ES | 2020-14 | 4 ES-Island  | 3 | 4 | #####    | #####    |  |
| 9  | 1 ES | 2020-14 | 4 ES-Island  | 3 | 5 | 0        | 0        |  |
| 10 | 1 ES | 2020-14 | 4 ES-Madrid  | 1 | 1 | #####    | #####    |  |
| 11 | 1 ES | 2020-14 | 4 ES-Madrid  | 1 | 2 | 1.522611 | 1.204419 |  |
| 12 | 1 ES | 2020-14 | 4 ES-Madrid  | 1 | 3 | 1.688536 | #####    |  |
| 13 | 1 ES | 2020-14 | 4 ES-Madrid  | 1 | 4 | #####    | #####    |  |
| 14 | 1 ES | 2020-14 | 4 ES-Madrid  | 1 | 5 | 0        | 0        |  |
| 15 | 1 ES | 2020-14 | 4 ES-Madrid  | 2 | 1 | #####    | #####    |  |
| 16 | 1 ES | 2020-14 | 4 ES-Madrid  | 2 | 2 | #####    | #####    |  |
| 17 | 1 ES | 2020-14 | 4 ES-Madrid  | 2 | 3 | #####    | #####    |  |
| 18 | 1 ES | 2020-14 | 4 ES-Madrid  | 2 | 4 | #####    | #####    |  |
| 19 | 1 ES | 2020-14 | 4 ES-Madrid  | 2 | 5 | 0        | 0        |  |
| 20 | 1 ES | 2020-14 | 4 ES-Madrid  | 3 | 1 | 1.521148 | #####    |  |
| 21 | 1 ES | 2020-14 | 4 ES-Madrid  | 3 | 2 | 3        | 2.683532 |  |
| 22 | 1 ES | 2020-14 | 4 ES-Madrid  | 3 | 3 | 2.785714 | 1.100146 |  |
| 23 | 1 ES | 2020-14 | 4 ES-Madrid  | 3 | 4 | 0        | 0        |  |
| 24 | 1 ES | 2020-14 | 4 ES-Madrid  | 3 | 5 | 0        | 0        |  |
| 25 | 1 ES | 2020-14 | 4 ES-Madrid  | 3 | 5 | 0        | 0        |  |
| 26 | 1 ES | 2020-14 | 4 ES-Northea | 1 | 1 | #####    | #####    |  |
| 27 | 1 ES | 2020-14 | 4 ES-Northea | 1 | 2 | #####    | #####    |  |
| 28 | 1 ES | 2020-14 | 4 ES-Northea | 1 | 3 | #####    | #####    |  |
| 29 | 1 ES | 2020-14 | 4 ES-Northea | 1 | 4 | 1.162255 | #####    |  |
| 30 | 1 ES | 2020-14 | 4 ES-Northea | 1 | 5 | #####    | #####    |  |
| 31 | 1 ES | 2020-14 | 4 ES-Northea | 2 | 1 | #####    | #####    |  |
| 32 | 1 ES | 2020-14 | 4 ES-Northea | 2 | 2 | 0.375    | #####    |  |
| 33 | 1 ES | 2020-14 | 4 ES-Northea | 2 | 3 | #####    | #####    |  |
| 34 | 1 ES | 2020-14 | 4 ES-Northea | 2 | 4 | #####    | #####    |  |
| 35 | 1 ES | 2020-14 | 4 ES-Northea | 2 | 5 | #####    | #####    |  |
| 36 | 1 ES | 2020-14 | 4 ES-Northea | 3 | 1 | #####    | #####    |  |
| 37 | 1 ES | 2020-14 | 4 ES-Northea | 3 | 2 | 0        | 0        |  |
| 38 | 1 ES | 2020-14 | 4 ES-Northea | 3 | 3 | 0.375    | #####    |  |
| 39 | 1 ES | 2020-14 | 4 ES-Northea | 3 | 4 | 1.4      | #####    |  |
| 40 | 1 ES | 2020-14 | 4 ES-Northea | 3 | 5 | 0        | 0        |  |
| 41 | 1 ES | 2020-14 | 4 ES-Northw  | 1 | 1 | #####    | #####    |  |
| 42 | 1 ES | 2020-14 | 4 ES-Northw  | 1 | 2 | #####    | #####    |  |
| 43 | 1 ES | 2020-14 | 4 ES-Northw  | 1 | 3 | #####    | #####    |  |
| 44 | 1 ES | 2020-14 | 4 ES-Northw  | 1 | 4 | 1.306406 | #####    |  |
| 45 | 1 ES | 2020-14 | 4 ES-Northw  | 1 | 5 | 0        | 0        |  |
| 46 | 1 ES | 2020-14 | 4 ES-Northw  | 2 | 1 | 1.293451 | #####    |  |
| 47 | 1 ES | 2020-14 | 4 ES-Northw  | 2 | 2 | 1        | #####    |  |
| 48 | 1 ES | 2020-14 | 4 ES-Northw  | 2 | 3 | 1.621622 | #####    |  |
| 49 | 1 ES | 2020-14 | 4 ES-Northw  | 2 | 4 | 2.09375  | #####    |  |
| 50 | 1 ES | 2020-14 | 4 ES-Northw  | 2 | 5 | 0        | 0        |  |
| 51 | 1 ES | 2020-14 | 4 ES-Northw  | 3 | 1 | #####    | #####    |  |
| 52 | 1 ES | 2020-14 | 4 ES-Northw  | 3 | 2 | 0        | 0        |  |
| 53 | 1 ES | 2020-14 | 4 ES-Northw  | 3 | 3 | #####    | #####    |  |
| 54 | 1 ES | 2020-14 | 4 ES-Northw  | 3 | 4 | #####    | #####    |  |
| 55 | 1 ES | 2020-14 | 4 ES-Northw  | 3 | 5 | 0        | 0        |  |
| 56 | 1 ES | 2020-14 | 4 ES-Northw  | 3 | 5 | 0        | 0        |  |
| 57 | 1 ES | 2020-14 | 4 ES-Overall | 1 | 1 | #####    | #####    |  |
| 58 | 1 ES | 2020-14 | 4 ES-Overall | 1 | 2 | 1.029068 | #####    |  |
| 59 | 1 ES | 2020-14 | 4 ES-Overall | 1 | 3 | 1.227249 | #####    |  |
| 60 | 1 ES | 2020-14 | 4 ES-Overall | 1 | 4 | #####    | #####    |  |

|    |      |         |              |   |   |          |          |  |
|----|------|---------|--------------|---|---|----------|----------|--|
| 1  |      |         |              |   |   |          |          |  |
| 2  |      |         |              |   |   |          |          |  |
| 3  | 1 ES | 2020-14 | 4 ES-Overall | 1 | 5 | #####    | #####    |  |
| 4  | 1 ES | 2020-14 | 4 ES-Overall | 2 | 1 | #####    | #####    |  |
| 5  | 1 ES | 2020-14 | 4 ES-Overall | 2 | 2 | #####    | #####    |  |
| 6  | 1 ES | 2020-14 | 4 ES-Overall | 2 | 3 | 1.07719  | #####    |  |
| 7  | 1 ES | 2020-14 | 4 ES-Overall | 2 | 4 | #####    | #####    |  |
| 8  | 1 ES | 2020-14 | 4 ES-Overall | 2 | 5 | #####    | #####    |  |
| 9  | 1 ES | 2020-14 | 4 ES-Overall | 3 | 1 | #####    | #####    |  |
| 10 | 1 ES | 2020-14 | 4 ES-Overall | 3 | 2 | 1.183647 | #####    |  |
| 11 | 1 ES | 2020-14 | 4 ES-Overall | 3 | 3 | 1.387831 | #####    |  |
| 12 | 1 ES | 2020-14 | 4 ES-Overall | 3 | 4 | #####    | #####    |  |
| 13 | 1 ES | 2020-14 | 4 ES-Overall | 3 | 5 | 0        | 0        |  |
| 14 | 1 ES | 2020-14 | 4 ES-South   | 1 | 1 | #####    | #####    |  |
| 15 | 1 ES | 2020-14 | 4 ES-South   | 1 | 2 | #####    | #####    |  |
| 16 | 1 ES | 2020-14 | 4 ES-South   | 1 | 3 | 1.363036 | #####    |  |
| 17 | 1 ES | 2020-14 | 4 ES-South   | 1 | 4 | 1.11288  | #####    |  |
| 18 | 1 ES | 2020-14 | 4 ES-South   | 1 | 5 | #####    | #####    |  |
| 19 | 1 ES | 2020-14 | 4 ES-South   | 2 | 1 | #####    | #####    |  |
| 20 | 1 ES | 2020-14 | 4 ES-South   | 2 | 2 | #####    | #####    |  |
| 21 | 1 ES | 2020-14 | 4 ES-South   | 2 | 3 | 1.101124 | #####    |  |
| 22 | 1 ES | 2020-14 | 4 ES-South   | 2 | 4 | #####    | #####    |  |
| 23 | 1 ES | 2020-14 | 4 ES-South   | 2 | 5 | 0.04     | #####    |  |
| 24 | 1 ES | 2020-14 | 4 ES-South   | 3 | 1 | 1.011096 | #####    |  |
| 25 | 1 ES | 2020-14 | 4 ES-South   | 3 | 2 | 0        | 0        |  |
| 26 | 1 ES | 2020-14 | 4 ES-South   | 3 | 3 | 1.619048 | #####    |  |
| 27 | 1 ES | 2020-14 | 4 ES-South   | 3 | 4 | 1.4      | #####    |  |
| 28 | 1 ES | 2020-14 | 4 ES-South   | 3 | 5 | 0        | 0        |  |
| 29 | 1 ES | 2020-14 | 5 ES-Center  | 1 | 1 | #####    | #####    |  |
| 30 | 1 ES | 2020-14 | 5 ES-Center  | 1 | 2 | 1.51211  | #####    |  |
| 31 | 1 ES | 2020-14 | 5 ES-Center  | 1 | 3 | #####    | #####    |  |
| 32 | 1 ES | 2020-14 | 5 ES-Center  | 1 | 4 | 1.036705 | #####    |  |
| 33 | 1 ES | 2020-14 | 5 ES-Center  | 1 | 5 | #####    | #####    |  |
| 34 | 1 ES | 2020-14 | 5 ES-Center  | 2 | 1 | #####    | #####    |  |
| 35 | 1 ES | 2020-14 | 5 ES-Center  | 2 | 2 | #####    | #####    |  |
| 36 | 1 ES | 2020-14 | 5 ES-Center  | 2 | 3 | #####    | #####    |  |
| 37 | 1 ES | 2020-14 | 5 ES-Center  | 2 | 4 | 1.122449 | #####    |  |
| 38 | 1 ES | 2020-14 | 5 ES-Center  | 2 | 5 | #####    | #####    |  |
| 39 | 1 ES | 2020-14 | 5 ES-Center  | 3 | 1 | 1.224899 | #####    |  |
| 40 | 1 ES | 2020-14 | 5 ES-Center  | 3 | 2 | 3.25     | 1.850004 |  |
| 41 | 1 ES | 2020-14 | 5 ES-Center  | 3 | 3 | #####    | #####    |  |
| 42 | 1 ES | 2020-14 | 5 ES-Center  | 3 | 4 | 0.9375   | #####    |  |
| 43 | 1 ES | 2020-14 | 5 ES-Center  | 3 | 5 | 0.75     | #####    |  |
| 44 | 1 ES | 2020-14 | 5 ES-East    | 1 | 1 | #####    | #####    |  |
| 45 | 1 ES | 2020-14 | 5 ES-East    | 1 | 2 | #####    | #####    |  |
| 46 | 1 ES | 2020-14 | 5 ES-East    | 1 | 3 | #####    | #####    |  |
| 47 | 1 ES | 2020-14 | 5 ES-East    | 1 | 4 | 1.031837 | #####    |  |
| 48 | 1 ES | 2020-14 | 5 ES-East    | 1 | 5 | #####    | #####    |  |
| 49 | 1 ES | 2020-14 | 5 ES-East    | 2 | 1 | #####    | #####    |  |
| 50 | 1 ES | 2020-14 | 5 ES-East    | 2 | 2 | 0.64     | #####    |  |
| 51 | 1 ES | 2020-14 | 5 ES-East    | 2 | 3 | #####    | #####    |  |
| 52 | 1 ES | 2020-14 | 5 ES-East    | 2 | 4 | #####    | #####    |  |
| 53 | 1 ES | 2020-14 | 5 ES-East    | 2 | 5 | 0.6      | #####    |  |
| 54 | 1 ES | 2020-14 | 5 ES-East    | 3 | 1 | #####    | #####    |  |
| 55 | 1 ES | 2020-14 | 5 ES-East    | 3 | 2 | 0.2      | #####    |  |
| 56 | 1 ES | 2020-14 | 5 ES-East    | 3 | 3 | #####    | #####    |  |
| 57 | 1 ES | 2020-14 | 5 ES-East    | 3 | 4 | 1.067797 | #####    |  |
| 58 | 1 ES | 2020-14 | 5 ES-East    | 3 | 5 | #####    | #####    |  |
| 59 | 1 ES | 2020-14 | 5 ES-East    | 3 | 5 | #####    | #####    |  |
| 60 | 1 ES | 2020-14 | 5 ES-East    | 3 | 5 | #####    | #####    |  |



|    |      |         |              |   |   |          |          |  |
|----|------|---------|--------------|---|---|----------|----------|--|
| 1  |      |         |              |   |   |          |          |  |
| 2  |      |         |              |   |   |          |          |  |
| 3  | 1 ES | 2020-14 | 5 ES-Island  | 1 | 1 | #####    | #####    |  |
| 4  | 1 ES | 2020-14 | 5 ES-Island  | 1 | 2 | #####    | #####    |  |
| 5  | 1 ES | 2020-14 | 5 ES-Island  | 1 | 3 | #####    | #####    |  |
| 6  | 1 ES | 2020-14 | 5 ES-Island  | 1 | 4 | 1.22665  | #####    |  |
| 7  | 1 ES | 2020-14 | 5 ES-Island  | 1 | 5 | #####    | #####    |  |
| 8  | 1 ES | 2020-14 | 5 ES-Island  | 2 | 1 | #####    | #####    |  |
| 9  | 1 ES | 2020-14 | 5 ES-Island  | 2 | 2 | #####    | #####    |  |
| 10 | 1 ES | 2020-14 | 5 ES-Island  | 2 | 3 | #####    | #####    |  |
| 11 | 1 ES | 2020-14 | 5 ES-Island  | 2 | 4 | 1.551724 | #####    |  |
| 12 | 1 ES | 2020-14 | 5 ES-Island  | 2 | 5 | #####    | #####    |  |
| 13 | 1 ES | 2020-14 | 5 ES-Island  | 3 | 1 | #####    | #####    |  |
| 14 | 1 ES | 2020-14 | 5 ES-Island  | 3 | 2 | 0        | 0        |  |
| 15 | 1 ES | 2020-14 | 5 ES-Island  | 3 | 3 | #####    | #####    |  |
| 16 | 1 ES | 2020-14 | 5 ES-Island  | 3 | 4 | #####    | #####    |  |
| 17 | 1 ES | 2020-14 | 5 ES-Island  | 3 | 5 | #####    | #####    |  |
| 18 | 1 ES | 2020-14 | 5 ES-Madrid  | 1 | 1 | 1.024528 | #####    |  |
| 19 | 1 ES | 2020-14 | 5 ES-Madrid  | 1 | 2 | 1.782709 | 1.209868 |  |
| 20 | 1 ES | 2020-14 | 5 ES-Madrid  | 1 | 3 | 1.081413 | #####    |  |
| 21 | 1 ES | 2020-14 | 5 ES-Madrid  | 1 | 4 | #####    | #####    |  |
| 22 | 1 ES | 2020-14 | 5 ES-Madrid  | 1 | 5 | #####    | #####    |  |
| 23 | 1 ES | 2020-14 | 5 ES-Madrid  | 2 | 1 | #####    | #####    |  |
| 24 | 1 ES | 2020-14 | 5 ES-Madrid  | 2 | 2 | #####    | #####    |  |
| 25 | 1 ES | 2020-14 | 5 ES-Madrid  | 2 | 3 | #####    | #####    |  |
| 26 | 1 ES | 2020-14 | 5 ES-Madrid  | 2 | 4 | #####    | #####    |  |
| 27 | 1 ES | 2020-14 | 5 ES-Madrid  | 2 | 5 | #####    | #####    |  |
| 28 | 1 ES | 2020-14 | 5 ES-Madrid  | 3 | 1 | 1.376563 | #####    |  |
| 29 | 1 ES | 2020-14 | 5 ES-Madrid  | 3 | 2 | 3.2      | 2.644486 |  |
| 30 | 1 ES | 2020-14 | 5 ES-Madrid  | 3 | 3 | 1.571429 | #####    |  |
| 31 | 1 ES | 2020-14 | 5 ES-Madrid  | 3 | 4 | #####    | #####    |  |
| 32 | 1 ES | 2020-14 | 5 ES-Madrid  | 3 | 5 | 0.875    | #####    |  |
| 33 | 1 ES | 2020-14 | 5 ES-Northea | 1 | 1 | #####    | #####    |  |
| 34 | 1 ES | 2020-14 | 5 ES-Northea | 1 | 2 | 1.022168 | #####    |  |
| 35 | 1 ES | 2020-14 | 5 ES-Northea | 1 | 3 | #####    | #####    |  |
| 36 | 1 ES | 2020-14 | 5 ES-Northea | 1 | 4 | 1.069601 | #####    |  |
| 37 | 1 ES | 2020-14 | 5 ES-Northea | 1 | 5 | 1.14158  | #####    |  |
| 38 | 1 ES | 2020-14 | 5 ES-Northea | 2 | 1 | #####    | #####    |  |
| 39 | 1 ES | 2020-14 | 5 ES-Northea | 2 | 2 | 1.294118 | 1.140023 |  |
| 40 | 1 ES | 2020-14 | 5 ES-Northea | 2 | 3 | 0.36     | #####    |  |
| 41 | 1 ES | 2020-14 | 5 ES-Northea | 2 | 4 | #####    | #####    |  |
| 42 | 1 ES | 2020-14 | 5 ES-Northea | 2 | 5 | #####    | #####    |  |
| 43 | 1 ES | 2020-14 | 5 ES-Northea | 3 | 1 | 1.152197 | #####    |  |
| 44 | 1 ES | 2020-14 | 5 ES-Northea | 3 | 2 | 0.5      | #####    |  |
| 45 | 1 ES | 2020-14 | 5 ES-Northea | 3 | 3 | #####    | #####    |  |
| 46 | 1 ES | 2020-14 | 5 ES-Northea | 3 | 4 | 1.735294 | #####    |  |
| 47 | 1 ES | 2020-14 | 5 ES-Northea | 3 | 5 | 1.777778 | #####    |  |
| 48 | 1 ES | 2020-14 | 5 ES-Northw  | 1 | 1 | 1.138739 | #####    |  |
| 49 | 1 ES | 2020-14 | 5 ES-Northw  | 1 | 2 | 2.794625 | 1.990028 |  |
| 50 | 1 ES | 2020-14 | 5 ES-Northw  | 1 | 3 | 1.106647 | #####    |  |
| 51 | 1 ES | 2020-14 | 5 ES-Northw  | 1 | 4 | 1.073619 | #####    |  |
| 52 | 1 ES | 2020-14 | 5 ES-Northw  | 1 | 5 | #####    | #####    |  |
| 53 | 1 ES | 2020-14 | 5 ES-Northw  | 2 | 1 | #####    | #####    |  |
| 54 | 1 ES | 2020-14 | 5 ES-Northw  | 2 | 2 | #####    | #####    |  |
| 55 | 1 ES | 2020-14 | 5 ES-Northw  | 2 | 3 | #####    | #####    |  |
| 56 | 1 ES | 2020-14 | 5 ES-Northw  | 2 | 4 | 1.121212 | #####    |  |
| 57 | 1 ES | 2020-14 | 5 ES-Northw  | 2 | 5 | #####    | #####    |  |
| 58 | 1 ES | 2020-14 | 5 ES-Northw  | 3 | 1 | 1.602448 | #####    |  |

|    |      |         |              |   |   |          |          |  |
|----|------|---------|--------------|---|---|----------|----------|--|
| 1  |      |         |              |   |   |          |          |  |
| 2  |      |         |              |   |   |          |          |  |
| 3  | 1 ES | 2020-14 | 5 ES-Northw  | 3 | 2 | 5.25     | 4.263246 |  |
| 4  | 1 ES | 2020-14 | 5 ES-Northw  | 3 | 3 | 1.64     | #####    |  |
| 5  | 1 ES | 2020-14 | 5 ES-Northw  | 3 | 4 | 1.029412 | #####    |  |
| 6  | 1 ES | 2020-14 | 5 ES-Northw  | 3 | 5 | 0.5      | #####    |  |
| 7  | 1 ES | 2020-14 | 5 ES-Overall | 1 | 1 | #####    | #####    |  |
| 8  | 1 ES | 2020-14 | 5 ES-Overall | 1 | 2 | 1.043361 | #####    |  |
| 9  | 1 ES | 2020-14 | 5 ES-Overall | 1 | 3 | #####    | #####    |  |
| 10 | 1 ES | 2020-14 | 5 ES-Overall | 1 | 4 | 1.03365  | #####    |  |
| 11 | 1 ES | 2020-14 | 5 ES-Overall | 1 | 5 | #####    | #####    |  |
| 12 | 1 ES | 2020-14 | 5 ES-Overall | 2 | 1 | #####    | #####    |  |
| 13 | 1 ES | 2020-14 | 5 ES-Overall | 2 | 2 | #####    | #####    |  |
| 14 | 1 ES | 2020-14 | 5 ES-Overall | 2 | 3 | #####    | #####    |  |
| 15 | 1 ES | 2020-14 | 5 ES-Overall | 2 | 4 | #####    | #####    |  |
| 16 | 1 ES | 2020-14 | 5 ES-Overall | 2 | 5 | #####    | #####    |  |
| 17 | 1 ES | 2020-14 | 5 ES-Overall | 3 | 1 | 1.130375 | #####    |  |
| 18 | 1 ES | 2020-14 | 5 ES-Overall | 3 | 2 | 1.24817  | #####    |  |
| 19 | 1 ES | 2020-14 | 5 ES-Overall | 3 | 3 | 1.257521 | #####    |  |
| 20 | 1 ES | 2020-14 | 5 ES-Overall | 3 | 4 | 1.081149 | #####    |  |
| 21 | 1 ES | 2020-14 | 5 ES-Overall | 3 | 5 | #####    | #####    |  |
| 22 | 1 ES | 2020-14 | 5 ES-South   | 1 | 1 | 1.029075 | #####    |  |
| 23 | 1 ES | 2020-14 | 5 ES-South   | 1 | 2 | #####    | #####    |  |
| 24 | 1 ES | 2020-14 | 5 ES-South   | 1 | 3 | 1.276776 | #####    |  |
| 25 | 1 ES | 2020-14 | 5 ES-South   | 1 | 4 | 1.129766 | #####    |  |
| 26 | 1 ES | 2020-14 | 5 ES-South   | 1 | 5 | #####    | #####    |  |
| 27 | 1 ES | 2020-14 | 5 ES-South   | 2 | 1 | #####    | #####    |  |
| 28 | 1 ES | 2020-14 | 5 ES-South   | 2 | 2 | 1.444444 | 1.083711 |  |
| 29 | 1 ES | 2020-14 | 5 ES-South   | 2 | 3 | #####    | #####    |  |
| 30 | 1 ES | 2020-14 | 5 ES-South   | 2 | 4 | #####    | #####    |  |
| 31 | 1 ES | 2020-14 | 5 ES-South   | 2 | 5 | 0.32     | #####    |  |
| 32 | 1 ES | 2020-14 | 5 ES-South   | 3 | 1 | 1.365181 | #####    |  |
| 33 | 1 ES | 2020-14 | 5 ES-South   | 3 | 2 | 0.2      | #####    |  |
| 34 | 1 ES | 2020-14 | 5 ES-South   | 3 | 3 | 2.047619 | 1.222498 |  |
| 35 | 1 ES | 2020-14 | 5 ES-South   | 3 | 4 | 1.366667 | #####    |  |
| 36 | 1 ES | 2020-14 | 5 ES-South   | 3 | 5 | 1        | #####    |  |
| 37 | 1 ES | 2020-15 | 1 ES-Center  | 1 | 1 | 3.51114  | #####    |  |
| 38 | 1 ES | 2020-15 | 1 ES-Center  | 1 | 2 | 3.879678 | #####    |  |
| 39 | 1 ES | 2020-15 | 1 ES-Center  | 1 | 3 | 4.349454 | #####    |  |
| 40 | 1 ES | 2020-15 | 1 ES-Center  | 1 | 4 | 4.539759 | #####    |  |
| 41 | 1 ES | 2020-15 | 1 ES-Center  | 1 | 5 | 2.061156 | #####    |  |
| 42 | 1 ES | 2020-15 | 1 ES-Center  | 2 | 1 | 3.059257 | #####    |  |
| 43 | 1 ES | 2020-15 | 1 ES-Center  | 2 | 2 | 4.0625   | 1.303569 |  |
| 44 | 1 ES | 2020-15 | 1 ES-Center  | 2 | 3 | 3.69697  | #####    |  |
| 45 | 1 ES | 2020-15 | 1 ES-Center  | 2 | 4 | 4.56     | #####    |  |
| 46 | 1 ES | 2020-15 | 1 ES-Center  | 2 | 5 | 1.166667 | #####    |  |
| 47 | 1 ES | 2020-15 | 1 ES-Center  | 3 | 1 | 4.056238 | #####    |  |
| 48 | 1 ES | 2020-15 | 1 ES-Center  | 3 | 2 | 3.5      | #####    |  |
| 49 | 1 ES | 2020-15 | 1 ES-Center  | 3 | 3 | 5.235294 | 1.835106 |  |
| 50 | 1 ES | 2020-15 | 1 ES-Center  | 3 | 4 | 4.518519 | #####    |  |
| 51 | 1 ES | 2020-15 | 1 ES-Center  | 3 | 5 | 3.086957 | #####    |  |
| 52 | 1 ES | 2020-15 | 1 ES-East    | 1 | 1 | 3.227259 | #####    |  |
| 53 | 1 ES | 2020-15 | 1 ES-East    | 1 | 2 | 2.383885 | #####    |  |
| 54 | 1 ES | 2020-15 | 1 ES-East    | 1 | 3 | 4.548971 | #####    |  |
| 55 | 1 ES | 2020-15 | 1 ES-East    | 1 | 4 | 2.938898 | #####    |  |
| 56 | 1 ES | 2020-15 | 1 ES-East    | 1 | 5 | 1.811131 | #####    |  |
| 57 | 1 ES | 2020-15 | 1 ES-East    | 2 | 1 | 2.99533  | #####    |  |
| 58 | 1 ES | 2020-15 | 1 ES-East    | 2 | 2 | 2.307692 | #####    |  |
| 59 | 1 ES | 2020-15 | 1 ES-East    | 2 | 2 | 2.307692 | #####    |  |
| 60 | 1 ES | 2020-15 | 1 ES-East    | 2 | 2 | 2.307692 | #####    |  |

|    |      |         |              |   |   |          |          |  |
|----|------|---------|--------------|---|---|----------|----------|--|
| 1  |      |         |              |   |   |          |          |  |
| 2  |      |         |              |   |   |          |          |  |
| 3  | 1 ES | 2020-15 | 1 ES-East    | 2 | 3 | 4.147287 | #####    |  |
| 4  | 1 ES | 2020-15 | 1 ES-East    | 2 | 4 | 2.748092 | #####    |  |
| 5  | 1 ES | 2020-15 | 1 ES-East    | 2 | 5 | 1.808511 | #####    |  |
| 6  | 1 ES | 2020-15 | 1 ES-East    | 3 | 1 | 3.445438 | #####    |  |
| 7  | 1 ES | 2020-15 | 1 ES-East    | 3 | 2 | 2.428571 | #####    |  |
| 8  | 1 ES | 2020-15 | 1 ES-East    | 3 | 3 | 4.909091 | 1.317077 |  |
| 9  | 1 ES | 2020-15 | 1 ES-East    | 3 | 4 | 3.138462 | #####    |  |
| 10 | 1 ES | 2020-15 | 1 ES-East    | 3 | 5 | 1.813953 | #####    |  |
| 11 | 1 ES | 2020-15 | 1 ES-Island  | 1 | 1 | 4.498985 | #####    |  |
| 12 | 1 ES | 2020-15 | 1 ES-Island  | 1 | 2 | 4.903572 | #####    |  |
| 13 | 1 ES | 2020-15 | 1 ES-Island  | 1 | 3 | 4.915783 | #####    |  |
| 14 | 1 ES | 2020-15 | 1 ES-Island  | 1 | 4 | 4.930521 | #####    |  |
| 15 | 1 ES | 2020-15 | 1 ES-Island  | 1 | 5 | 2.016746 | #####    |  |
| 16 | 1 ES | 2020-15 | 1 ES-Island  | 2 | 1 | 4.310223 | #####    |  |
| 17 | 1 ES | 2020-15 | 1 ES-Island  | 2 | 2 | 4        | 1.374497 |  |
| 18 | 1 ES | 2020-15 | 1 ES-Island  | 2 | 3 | 5.65     | 1.465188 |  |
| 19 | 1 ES | 2020-15 | 1 ES-Island  | 2 | 4 | 4.555556 | #####    |  |
| 20 | 1 ES | 2020-15 | 1 ES-Island  | 2 | 5 | 1.7      | #####    |  |
| 21 | 1 ES | 2020-15 | 1 ES-Island  | 3 | 1 | 4.700721 | #####    |  |
| 22 | 1 ES | 2020-15 | 1 ES-Island  | 3 | 2 | 5.5      | #####    |  |
| 23 | 1 ES | 2020-15 | 1 ES-Island  | 3 | 3 | 4.333333 | #####    |  |
| 24 | 1 ES | 2020-15 | 1 ES-Island  | 3 | 4 | 5.466667 | 1.563239 |  |
| 25 | 1 ES | 2020-15 | 1 ES-Island  | 3 | 5 | 2.5      | #####    |  |
| 26 | 1 ES | 2020-15 | 1 ES-Madrid  | 1 | 1 | 3.761724 | #####    |  |
| 27 | 1 ES | 2020-15 | 1 ES-Madrid  | 1 | 2 | 5.013188 | 1.402837 |  |
| 28 | 1 ES | 2020-15 | 1 ES-Madrid  | 1 | 3 | 3.680186 | #####    |  |
| 29 | 1 ES | 2020-15 | 1 ES-Madrid  | 1 | 4 | 3.891054 | #####    |  |
| 30 | 1 ES | 2020-15 | 1 ES-Madrid  | 1 | 5 | 3.10719  | #####    |  |
| 31 | 1 ES | 2020-15 | 1 ES-Madrid  | 2 | 1 | 3.958172 | #####    |  |
| 32 | 1 ES | 2020-15 | 1 ES-Madrid  | 2 | 2 | 9.1      | 2.865403 |  |
| 33 | 1 ES | 2020-15 | 1 ES-Madrid  | 2 | 3 | 4.076923 | #####    |  |
| 34 | 1 ES | 2020-15 | 1 ES-Madrid  | 2 | 4 | 3.685714 | #####    |  |
| 35 | 1 ES | 2020-15 | 1 ES-Madrid  | 2 | 5 | 2.96875  | #####    |  |
| 36 | 1 ES | 2020-15 | 1 ES-Madrid  | 3 | 1 | 3.513581 | #####    |  |
| 37 | 1 ES | 2020-15 | 1 ES-Madrid  | 3 | 2 | 2.6      | #####    |  |
| 38 | 1 ES | 2020-15 | 1 ES-Madrid  | 3 | 3 | 3.275862 | #####    |  |
| 39 | 1 ES | 2020-15 | 1 ES-Madrid  | 3 | 4 | 4.173913 | #####    |  |
| 40 | 1 ES | 2020-15 | 1 ES-Madrid  | 3 | 5 | 3.411765 | #####    |  |
| 41 | 1 ES | 2020-15 | 1 ES-Northea | 1 | 1 | 3.524789 | #####    |  |
| 42 | 1 ES | 2020-15 | 1 ES-Northea | 1 | 2 | 3.338631 | #####    |  |
| 43 | 1 ES | 2020-15 | 1 ES-Northea | 1 | 3 | 3.987501 | #####    |  |
| 44 | 1 ES | 2020-15 | 1 ES-Northea | 1 | 4 | 4.152012 | #####    |  |
| 45 | 1 ES | 2020-15 | 1 ES-Northea | 1 | 5 | 2.230691 | #####    |  |
| 46 | 1 ES | 2020-15 | 1 ES-Northea | 2 | 1 | 3.278737 | #####    |  |
| 47 | 1 ES | 2020-15 | 1 ES-Northea | 2 | 2 | 5.363636 | 2.082281 |  |
| 48 | 1 ES | 2020-15 | 1 ES-Northea | 2 | 3 | 4.123288 | #####    |  |
| 49 | 1 ES | 2020-15 | 1 ES-Northea | 2 | 4 | 3.536232 | #####    |  |
| 50 | 1 ES | 2020-15 | 1 ES-Northea | 2 | 5 | 1.4375   | #####    |  |
| 51 | 1 ES | 2020-15 | 1 ES-Northea | 3 | 1 | 3.79115  | #####    |  |
| 52 | 1 ES | 2020-15 | 1 ES-Northea | 3 | 2 | 2.5      | #####    |  |
| 53 | 1 ES | 2020-15 | 1 ES-Northea | 3 | 3 | 3.785714 | 1.001004 |  |
| 54 | 1 ES | 2020-15 | 1 ES-Northea | 3 | 4 | 4.75     | #####    |  |
| 55 | 1 ES | 2020-15 | 1 ES-Northea | 3 | 5 | 3.538462 | #####    |  |
| 56 | 1 ES | 2020-15 | 1 ES-Northw  | 1 | 1 | 3.476862 | #####    |  |
| 57 | 1 ES | 2020-15 | 1 ES-Northw  | 1 | 2 | 3.114838 | #####    |  |
| 58 | 1 ES | 2020-15 | 1 ES-Northw  | 1 | 3 | 3.705643 | #####    |  |
| 59 | 1 ES | 2020-15 | 1 ES-Northw  | 1 |   |          |          |  |
| 60 | 1 ES | 2020-15 | 1 ES-Northw  | 1 |   |          |          |  |

|    |      |         |              |   |   |          |          |  |
|----|------|---------|--------------|---|---|----------|----------|--|
| 1  |      |         |              |   |   |          |          |  |
| 2  |      |         |              |   |   |          |          |  |
| 3  | 1 ES | 2020-15 | 1 ES-Northw  | 1 | 4 | 4.017196 | #####    |  |
| 4  | 1 ES | 2020-15 | 1 ES-Northw  | 1 | 5 | 2.738554 | #####    |  |
| 5  | 1 ES | 2020-15 | 1 ES-Northw  | 2 | 1 | 3.68281  | #####    |  |
| 6  | 1 ES | 2020-15 | 1 ES-Northw  | 2 | 2 | 2.411765 | #####    |  |
| 7  | 1 ES | 2020-15 | 1 ES-Northw  | 2 | 3 | 4.743243 | #####    |  |
| 8  | 1 ES | 2020-15 | 1 ES-Northw  | 2 | 4 | 3.545455 | #####    |  |
| 9  | 1 ES | 2020-15 | 1 ES-Northw  | 2 | 5 | 3.35     | 1.027897 |  |
| 10 | 1 ES | 2020-15 | 1 ES-Northw  | 3 | 1 | 3.231009 | #####    |  |
| 11 | 1 ES | 2020-15 | 1 ES-Northw  | 3 | 2 | 6        | 0        |  |
| 12 | 1 ES | 2020-15 | 1 ES-Northw  | 3 | 3 | 2.75     | #####    |  |
| 13 | 1 ES | 2020-15 | 1 ES-Northw  | 3 | 4 | 4.5      | #####    |  |
| 14 | 1 ES | 2020-15 | 1 ES-Northw  | 3 | 5 | 1.85     | #####    |  |
| 15 | 1 ES | 2020-15 | 1 ES-Overall | 1 | 1 | 3.6374   | #####    |  |
| 16 | 1 ES | 2020-15 | 1 ES-Overall | 1 | 2 | 3.689813 | #####    |  |
| 17 | 1 ES | 2020-15 | 1 ES-Overall | 1 | 3 | 4.418194 | #####    |  |
| 18 | 1 ES | 2020-15 | 1 ES-Overall | 1 | 4 | 3.835901 | #####    |  |
| 19 | 1 ES | 2020-15 | 1 ES-Overall | 1 | 5 | 2.253422 | #####    |  |
| 20 | 1 ES | 2020-15 | 1 ES-Overall | 2 | 1 | 3.472412 | #####    |  |
| 21 | 1 ES | 2020-15 | 1 ES-Overall | 2 | 2 | 4.488703 | #####    |  |
| 22 | 1 ES | 2020-15 | 1 ES-Overall | 2 | 3 | 4.109157 | #####    |  |
| 23 | 1 ES | 2020-15 | 1 ES-Overall | 2 | 4 | 3.642541 | #####    |  |
| 24 | 1 ES | 2020-15 | 1 ES-Overall | 2 | 5 | 2.141681 | #####    |  |
| 25 | 1 ES | 2020-15 | 1 ES-Overall | 3 | 1 | 3.81761  | #####    |  |
| 26 | 1 ES | 2020-15 | 1 ES-Overall | 3 | 2 | 3.079336 | #####    |  |
| 27 | 1 ES | 2020-15 | 1 ES-Overall | 3 | 3 | 4.742178 | #####    |  |
| 28 | 1 ES | 2020-15 | 1 ES-Overall | 3 | 4 | 4.044228 | #####    |  |
| 29 | 1 ES | 2020-15 | 1 ES-Overall | 3 | 5 | 2.408331 | #####    |  |
| 30 | 1 ES | 2020-15 | 1 ES-South   | 1 | 1 | 4.175101 | #####    |  |
| 31 | 1 ES | 2020-15 | 1 ES-South   | 1 | 2 | 4.530405 | #####    |  |
| 32 | 1 ES | 2020-15 | 1 ES-South   | 1 | 3 | 5.097054 | #####    |  |
| 33 | 1 ES | 2020-15 | 1 ES-South   | 1 | 4 | 4.067716 | #####    |  |
| 34 | 1 ES | 2020-15 | 1 ES-South   | 1 | 5 | 2.198259 | #####    |  |
| 35 | 1 ES | 2020-15 | 1 ES-South   | 2 | 1 | 3.838476 | #####    |  |
| 36 | 1 ES | 2020-15 | 1 ES-South   | 2 | 2 | 5.5      | 1.613894 |  |
| 37 | 1 ES | 2020-15 | 1 ES-South   | 2 | 3 | 3.793814 | #####    |  |
| 38 | 1 ES | 2020-15 | 1 ES-South   | 2 | 4 | 4.096774 | #####    |  |
| 39 | 1 ES | 2020-15 | 1 ES-South   | 2 | 5 | 2.583333 | #####    |  |
| 40 | 1 ES | 2020-15 | 1 ES-South   | 3 | 1 | 4.548534 | #####    |  |
| 41 | 1 ES | 2020-15 | 1 ES-South   | 3 | 2 | 3.75     | #####    |  |
| 42 | 1 ES | 2020-15 | 1 ES-South   | 3 | 3 | 6.631579 | 1.747675 |  |
| 43 | 1 ES | 2020-15 | 1 ES-South   | 3 | 4 | 4.039216 | #####    |  |
| 44 | 1 ES | 2020-15 | 1 ES-South   | 3 | 5 | 1.5625   | #####    |  |
| 45 | 1 ES | 2020-15 | 2 ES-Center  | 1 | 1 | 1.721769 | #####    |  |
| 46 | 1 ES | 2020-15 | 2 ES-Center  | 1 | 2 | 2.248659 | #####    |  |
| 47 | 1 ES | 2020-15 | 2 ES-Center  | 1 | 3 | 1.873574 | #####    |  |
| 48 | 1 ES | 2020-15 | 2 ES-Center  | 1 | 4 | 1.887053 | #####    |  |
| 49 | 1 ES | 2020-15 | 2 ES-Center  | 1 | 5 | 1.355122 | #####    |  |
| 50 | 1 ES | 2020-15 | 2 ES-Center  | 2 | 1 | 1.629194 | #####    |  |
| 51 | 1 ES | 2020-15 | 2 ES-Center  | 2 | 2 | 2.1875   | #####    |  |
| 52 | 1 ES | 2020-15 | 2 ES-Center  | 2 | 3 | 2.136986 | #####    |  |
| 53 | 1 ES | 2020-15 | 2 ES-Center  | 2 | 4 | 1.848101 | #####    |  |
| 54 | 1 ES | 2020-15 | 2 ES-Center  | 2 | 5 | #####    | #####    |  |
| 55 | 1 ES | 2020-15 | 2 ES-Center  | 3 | 1 | 1.832272 | #####    |  |
| 56 | 1 ES | 2020-15 | 2 ES-Center  | 3 | 2 | 2.333333 | #####    |  |
| 57 | 1 ES | 2020-15 | 2 ES-Center  | 3 | 3 | 1.5      | #####    |  |
| 58 | 1 ES | 2020-15 | 2 ES-Center  | 3 | 4 | 1.928571 | #####    |  |
| 59 | 1 ES | 2020-15 | 2 ES-Center  | 3 |   |          |          |  |
| 60 | 1 ES | 2020-15 | 2 ES-Center  | 3 |   |          |          |  |

|    |      |         |              |   |   |          |          |  |
|----|------|---------|--------------|---|---|----------|----------|--|
| 1  |      |         |              |   |   |          |          |  |
| 2  |      |         |              |   |   |          |          |  |
| 3  | 1 ES | 2020-15 | 2 ES-Center  | 3 | 5 | 1.826087 | #####    |  |
| 4  | 1 ES | 2020-15 | 2 ES-East    | 1 | 1 | 1.734916 | #####    |  |
| 5  | 1 ES | 2020-15 | 2 ES-East    | 1 | 2 | 2.198159 | #####    |  |
| 6  | 1 ES | 2020-15 | 2 ES-East    | 1 | 3 | 2.060151 | #####    |  |
| 7  | 1 ES | 2020-15 | 2 ES-East    | 1 | 4 | 1.638296 | #####    |  |
| 8  | 1 ES | 2020-15 | 2 ES-East    | 1 | 5 | 1.078214 | #####    |  |
| 9  | 1 ES | 2020-15 | 2 ES-East    | 2 | 1 | 1.679871 | #####    |  |
| 10 | 1 ES | 2020-15 | 2 ES-East    | 2 | 2 | 2.285714 | #####    |  |
| 11 | 1 ES | 2020-15 | 2 ES-East    | 2 | 3 | 2.095588 | #####    |  |
| 12 | 1 ES | 2020-15 | 2 ES-East    | 2 | 4 | 1.525926 | #####    |  |
| 13 | 1 ES | 2020-15 | 2 ES-East    | 2 | 5 | 1.021277 | #####    |  |
| 14 | 1 ES | 2020-15 | 2 ES-East    | 3 | 1 | 1.787113 | #####    |  |
| 15 | 1 ES | 2020-15 | 2 ES-East    | 3 | 2 | 2.142857 | #####    |  |
| 16 | 1 ES | 2020-15 | 2 ES-East    | 3 | 3 | 2.028571 | #####    |  |
| 17 | 1 ES | 2020-15 | 2 ES-East    | 3 | 4 | 1.757576 | #####    |  |
| 18 | 1 ES | 2020-15 | 2 ES-East    | 3 | 5 | 1.139535 | #####    |  |
| 19 | 1 ES | 2020-15 | 2 ES-Island  | 1 | 1 | 2.009656 | #####    |  |
| 20 | 1 ES | 2020-15 | 2 ES-Island  | 1 | 2 | 3.192036 | #####    |  |
| 21 | 1 ES | 2020-15 | 2 ES-Island  | 1 | 3 | 2.182213 | #####    |  |
| 22 | 1 ES | 2020-15 | 2 ES-Island  | 1 | 4 | 1.686655 | #####    |  |
| 23 | 1 ES | 2020-15 | 2 ES-Island  | 1 | 5 | 1.263955 | #####    |  |
| 24 | 1 ES | 2020-15 | 2 ES-Island  | 2 | 1 | 1.785018 | #####    |  |
| 25 | 1 ES | 2020-15 | 2 ES-Island  | 2 | 2 | 2.142857 | #####    |  |
| 26 | 1 ES | 2020-15 | 2 ES-Island  | 2 | 3 | 2.136364 | #####    |  |
| 27 | 1 ES | 2020-15 | 2 ES-Island  | 2 | 4 | 1.744681 | #####    |  |
| 28 | 1 ES | 2020-15 | 2 ES-Island  | 2 | 5 | 1        | #####    |  |
| 29 | 1 ES | 2020-15 | 2 ES-Island  | 3 | 1 | 2.26548  | #####    |  |
| 30 | 1 ES | 2020-15 | 2 ES-Island  | 3 | 2 | 4        | 1.414346 |  |
| 31 | 1 ES | 2020-15 | 2 ES-Island  | 3 | 3 | 2.222222 | #####    |  |
| 32 | 1 ES | 2020-15 | 2 ES-Island  | 3 | 4 | 1.6      | #####    |  |
| 33 | 1 ES | 2020-15 | 2 ES-Island  | 3 | 5 | 1.666667 | #####    |  |
| 34 | 1 ES | 2020-15 | 2 ES-Madrid  | 1 | 1 | 1.860331 | #####    |  |
| 35 | 1 ES | 2020-15 | 2 ES-Madrid  | 1 | 2 | 2.72171  | #####    |  |
| 36 | 1 ES | 2020-15 | 2 ES-Madrid  | 1 | 3 | 1.961357 | #####    |  |
| 37 | 1 ES | 2020-15 | 2 ES-Madrid  | 1 | 4 | 1.893247 | #####    |  |
| 38 | 1 ES | 2020-15 | 2 ES-Madrid  | 1 | 5 | 1.2392   | #####    |  |
| 39 | 1 ES | 2020-15 | 2 ES-Madrid  | 2 | 1 | 1.862829 | #####    |  |
| 40 | 1 ES | 2020-15 | 2 ES-Madrid  | 2 | 2 | 2.909091 | #####    |  |
| 41 | 1 ES | 2020-15 | 2 ES-Madrid  | 2 | 3 | 2.080808 | #####    |  |
| 42 | 1 ES | 2020-15 | 2 ES-Madrid  | 2 | 4 | 1.953271 | #####    |  |
| 43 | 1 ES | 2020-15 | 2 ES-Madrid  | 2 | 5 | 1.1875   | #####    |  |
| 44 | 1 ES | 2020-15 | 2 ES-Madrid  | 3 | 1 | 1.857138 | #####    |  |
| 45 | 1 ES | 2020-15 | 2 ES-Madrid  | 3 | 2 | 2.6      | #####    |  |
| 46 | 1 ES | 2020-15 | 2 ES-Madrid  | 3 | 3 | 1.833333 | #####    |  |
| 47 | 1 ES | 2020-15 | 2 ES-Madrid  | 3 | 4 | 1.8125   | #####    |  |
| 48 | 1 ES | 2020-15 | 2 ES-Madrid  | 3 | 5 | 1.352941 | #####    |  |
| 49 | 1 ES | 2020-15 | 2 ES-Northea | 1 | 1 | 1.809473 | #####    |  |
| 50 | 1 ES | 2020-15 | 2 ES-Northea | 1 | 2 | 2.081591 | #####    |  |
| 51 | 1 ES | 2020-15 | 2 ES-Northea | 1 | 3 | 1.953444 | #####    |  |
| 52 | 1 ES | 2020-15 | 2 ES-Northea | 1 | 4 | 2.054785 | #####    |  |
| 53 | 1 ES | 2020-15 | 2 ES-Northea | 1 | 5 | 1.087124 | #####    |  |
| 54 | 1 ES | 2020-15 | 2 ES-Northea | 2 | 1 | 1.790286 | #####    |  |
| 55 | 1 ES | 2020-15 | 2 ES-Northea | 2 | 2 | 3        | #####    |  |
| 56 | 1 ES | 2020-15 | 2 ES-Northea | 2 | 3 | 2.103896 | #####    |  |
| 57 | 1 ES | 2020-15 | 2 ES-Northea | 2 | 4 | 1.814286 | #####    |  |
| 58 | 1 ES | 2020-15 | 2 ES-Northea | 2 | 5 | 1        | #####    |  |
| 59 | 1 ES | 2020-15 | 2 ES-Northea | 2 | 5 | 1        | #####    |  |
| 60 | 1 ES | 2020-15 | 2 ES-Northea | 2 | 5 | 1        | #####    |  |

1  
2  
3  
4  
5  
6  
7  
8  
9  
10  
11  
12  
13  
14  
15  
16  
17  
18  
19  
20  
21  
22  
23  
24  
25  
26  
27  
28  
29  
30  
31  
32  
33  
34  
35  
36  
37  
38  
39  
40  
41  
42  
43  
44  
45  
46  
47  
48  
49  
50  
51  
52  
53  
54  
55  
56  
57  
58  
59  
60

|      |         |              |   |   |          |       |
|------|---------|--------------|---|---|----------|-------|
| 1 ES | 2020-15 | 2 ES-Northea | 3 | 1 | 1.830023 | ##### |
| 1 ES | 2020-15 | 2 ES-Northea | 3 | 2 | 1.666667 | ##### |
| 1 ES | 2020-15 | 2 ES-Northea | 3 | 3 | 1.733333 | ##### |
| 1 ES | 2020-15 | 2 ES-Northea | 3 | 4 | 2.276596 | ##### |
| 1 ES | 2020-15 | 2 ES-Northea | 3 | 5 | 1.230769 | ##### |
| 1 ES | 2020-15 | 2 ES-Northw  | 1 | 1 | 1.707506 | ##### |
| 1 ES | 2020-15 | 2 ES-Northw  | 1 | 2 | 2.322575 | ##### |
| 1 ES | 2020-15 | 2 ES-Northw  | 1 | 3 | 2.057902 | ##### |
| 1 ES | 2020-15 | 2 ES-Northw  | 1 | 4 | 1.680716 | ##### |
| 1 ES | 2020-15 | 2 ES-Northw  | 1 | 5 | 1.236948 | ##### |
| 1 ES | 2020-15 | 2 ES-Northw  | 2 | 1 | 1.762787 | ##### |
| 1 ES | 2020-15 | 2 ES-Northw  | 2 | 2 | 2.166667 | ##### |
| 1 ES | 2020-15 | 2 ES-Northw  | 2 | 3 | 2.207792 | ##### |
| 1 ES | 2020-15 | 2 ES-Northw  | 2 | 4 | 1.625    | ##### |
| 1 ES | 2020-15 | 2 ES-Northw  | 2 | 5 | 1.4      | ##### |
| 1 ES | 2020-15 | 2 ES-Northw  | 3 | 1 | 1.641877 | ##### |
| 1 ES | 2020-15 | 2 ES-Northw  | 3 | 2 | 3        | 0     |
| 1 ES | 2020-15 | 2 ES-Northw  | 3 | 3 | 1.92     | ##### |
| 1 ES | 2020-15 | 2 ES-Northw  | 3 | 4 | 1.736842 | ##### |
| 1 ES | 2020-15 | 2 ES-Northw  | 3 | 5 | 1        | ##### |
| 1 ES | 2020-15 | 2 ES-Overall | 1 | 1 | 1.839908 | ##### |
| 1 ES | 2020-15 | 2 ES-Overall | 1 | 2 | 2.567805 | ##### |
| 1 ES | 2020-15 | 2 ES-Overall | 1 | 3 | 2.076938 | ##### |
| 1 ES | 2020-15 | 2 ES-Overall | 1 | 4 | 1.829892 | ##### |
| 1 ES | 2020-15 | 2 ES-Overall | 1 | 5 | 1.173936 | ##### |
| 1 ES | 2020-15 | 2 ES-Overall | 2 | 1 | 1.788479 | ##### |
| 1 ES | 2020-15 | 2 ES-Overall | 2 | 2 | 2.583187 | ##### |
| 1 ES | 2020-15 | 2 ES-Overall | 2 | 3 | 2.165389 | ##### |
| 1 ES | 2020-15 | 2 ES-Overall | 2 | 4 | 1.751627 | ##### |
| 1 ES | 2020-15 | 2 ES-Overall | 2 | 5 | 1.075808 | ##### |
| 1 ES | 2020-15 | 2 ES-Overall | 3 | 1 | 1.896201 | ##### |
| 1 ES | 2020-15 | 2 ES-Overall | 3 | 2 | 2.555737 | ##### |
| 1 ES | 2020-15 | 2 ES-Overall | 3 | 3 | 1.98309  | ##### |
| 1 ES | 2020-15 | 2 ES-Overall | 3 | 4 | 1.913654 | ##### |
| 1 ES | 2020-15 | 2 ES-Overall | 3 | 5 | 1.309973 | ##### |
| 1 ES | 2020-15 | 2 ES-South   | 1 | 1 | 2.096069 | ##### |
| 1 ES | 2020-15 | 2 ES-South   | 1 | 2 | 3.314189 | ##### |
| 1 ES | 2020-15 | 2 ES-South   | 1 | 3 | 2.295041 | ##### |
| 1 ES | 2020-15 | 2 ES-South   | 1 | 4 | 1.980473 | ##### |
| 1 ES | 2020-15 | 2 ES-South   | 1 | 5 | 1.023576 | ##### |
| 1 ES | 2020-15 | 2 ES-South   | 2 | 1 | 1.993008 | ##### |
| 1 ES | 2020-15 | 2 ES-South   | 2 | 2 | 3.083333 | ##### |
| 1 ES | 2020-15 | 2 ES-South   | 2 | 3 | 2.333333 | ##### |
| 1 ES | 2020-15 | 2 ES-South   | 2 | 4 | 1.860215 | ##### |
| 1 ES | 2020-15 | 2 ES-South   | 2 | 5 | 1        | ##### |
| 1 ES | 2020-15 | 2 ES-South   | 3 | 1 | 2.209615 | ##### |
| 1 ES | 2020-15 | 2 ES-South   | 3 | 2 | 3.5      | ##### |
| 1 ES | 2020-15 | 2 ES-South   | 3 | 3 | 2.25     | ##### |
| 1 ES | 2020-15 | 2 ES-South   | 3 | 4 | 2.096154 | ##### |
| 1 ES | 2020-15 | 2 ES-South   | 3 | 5 | 1.0625   | ##### |
| 1 ES | 2020-15 | 3 ES-Center  | 1 | 1 | #####    | ##### |
| 1 ES | 2020-15 | 3 ES-Center  | 1 | 2 | 0        | 0     |
| 1 ES | 2020-15 | 3 ES-Center  | 1 | 3 | #####    | ##### |
| 1 ES | 2020-15 | 3 ES-Center  | 1 | 4 | #####    | ##### |
| 1 ES | 2020-15 | 3 ES-Center  | 1 | 5 | 0        | 0     |
| 1 ES | 2020-15 | 3 ES-Center  | 2 | 1 | #####    | ##### |

|    |      |         |             |   |   |        |       |  |
|----|------|---------|-------------|---|---|--------|-------|--|
| 1  |      |         |             |   |   |        |       |  |
| 2  |      |         |             |   |   |        |       |  |
| 3  | 1 ES | 2020-15 | 3 ES-Center | 2 | 2 | 0      | 0     |  |
| 4  | 1 ES | 2020-15 | 3 ES-Center | 2 | 3 | #####  | ##### |  |
| 5  | 1 ES | 2020-15 | 3 ES-Center | 2 | 4 | 0.0375 | ##### |  |
| 6  | 1 ES | 2020-15 | 3 ES-Center | 2 | 5 | 0      | 0     |  |
| 7  | 1 ES | 2020-15 | 3 ES-Center | 3 | 1 | 0      | 0     |  |
| 8  | 1 ES | 2020-15 | 3 ES-Center | 3 | 2 | 0      | 0     |  |
| 9  | 1 ES | 2020-15 | 3 ES-Center | 3 | 3 | 0      | 0     |  |
| 10 | 1 ES | 2020-15 | 3 ES-Center | 3 | 4 | 0      | 0     |  |
| 11 | 1 ES | 2020-15 | 3 ES-Center | 3 | 5 | 0      | 0     |  |
| 12 | 1 ES | 2020-15 | 3 ES-East   | 1 | 1 | #####  | ##### |  |
| 13 | 1 ES | 2020-15 | 3 ES-East   | 1 | 2 | 0      | 0     |  |
| 14 | 1 ES | 2020-15 | 3 ES-East   | 1 | 3 | #####  | ##### |  |
| 15 | 1 ES | 2020-15 | 3 ES-East   | 1 | 4 | #####  | ##### |  |
| 16 | 1 ES | 2020-15 | 3 ES-East   | 1 | 5 | 0      | 0     |  |
| 17 | 1 ES | 2020-15 | 3 ES-East   | 2 | 1 | #####  | ##### |  |
| 18 | 1 ES | 2020-15 | 3 ES-East   | 2 | 2 | 0      | 0     |  |
| 19 | 1 ES | 2020-15 | 3 ES-East   | 2 | 3 | #####  | ##### |  |
| 20 | 1 ES | 2020-15 | 3 ES-East   | 2 | 4 | #####  | ##### |  |
| 21 | 1 ES | 2020-15 | 3 ES-East   | 2 | 5 | 0      | 0     |  |
| 22 | 1 ES | 2020-15 | 3 ES-East   | 3 | 1 | #####  | ##### |  |
| 23 | 1 ES | 2020-15 | 3 ES-East   | 3 | 2 | 0      | 0     |  |
| 24 | 1 ES | 2020-15 | 3 ES-East   | 3 | 3 | #####  | ##### |  |
| 25 | 1 ES | 2020-15 | 3 ES-East   | 3 | 4 | 0      | 0     |  |
| 26 | 1 ES | 2020-15 | 3 ES-East   | 3 | 5 | 0      | 0     |  |
| 27 | 1 ES | 2020-15 | 3 ES-Island | 1 | 1 | #####  | ##### |  |
| 28 | 1 ES | 2020-15 | 3 ES-Island | 1 | 2 | 0      | 0     |  |
| 29 | 1 ES | 2020-15 | 3 ES-Island | 1 | 3 | 0      | 0     |  |
| 30 | 1 ES | 2020-15 | 3 ES-Island | 1 | 4 | #####  | ##### |  |
| 31 | 1 ES | 2020-15 | 3 ES-Island | 1 | 5 | 0      | 0     |  |
| 32 | 1 ES | 2020-15 | 3 ES-Island | 2 | 1 | #####  | ##### |  |
| 33 | 1 ES | 2020-15 | 3 ES-Island | 2 | 2 | 0      | 0     |  |
| 34 | 1 ES | 2020-15 | 3 ES-Island | 2 | 3 | 0      | 0     |  |
| 35 | 1 ES | 2020-15 | 3 ES-Island | 2 | 4 | #####  | ##### |  |
| 36 | 1 ES | 2020-15 | 3 ES-Island | 2 | 5 | 0      | 0     |  |
| 37 | 1 ES | 2020-15 | 3 ES-Island | 3 | 1 | 0      | 0     |  |
| 38 | 1 ES | 2020-15 | 3 ES-Island | 3 | 2 | 0      | 0     |  |
| 39 | 1 ES | 2020-15 | 3 ES-Island | 3 | 3 | 0      | 0     |  |
| 40 | 1 ES | 2020-15 | 3 ES-Island | 3 | 4 | 0      | 0     |  |
| 41 | 1 ES | 2020-15 | 3 ES-Island | 3 | 5 | 0      | 0     |  |
| 42 | 1 ES | 2020-15 | 3 ES-Madrid | 1 | 1 | #####  | ##### |  |
| 43 | 1 ES | 2020-15 | 3 ES-Madrid | 1 | 2 | 0      | 0     |  |
| 44 | 1 ES | 2020-15 | 3 ES-Madrid | 1 | 3 | 0      | 0     |  |
| 45 | 1 ES | 2020-15 | 3 ES-Madrid | 1 | 4 | #####  | ##### |  |
| 46 | 1 ES | 2020-15 | 3 ES-Madrid | 1 | 5 | #####  | ##### |  |
| 47 | 1 ES | 2020-15 | 3 ES-Madrid | 2 | 1 | #####  | ##### |  |
| 48 | 1 ES | 2020-15 | 3 ES-Madrid | 2 | 2 | 0      | 0     |  |
| 49 | 1 ES | 2020-15 | 3 ES-Madrid | 2 | 3 | 0      | 0     |  |
| 50 | 1 ES | 2020-15 | 3 ES-Madrid | 2 | 4 | #####  | ##### |  |
| 51 | 1 ES | 2020-15 | 3 ES-Madrid | 2 | 5 | 0      | 0     |  |
| 52 | 1 ES | 2020-15 | 3 ES-Madrid | 3 | 1 | #####  | ##### |  |
| 53 | 1 ES | 2020-15 | 3 ES-Madrid | 3 | 2 | 0      | 0     |  |
| 54 | 1 ES | 2020-15 | 3 ES-Madrid | 3 | 3 | 0      | 0     |  |
| 55 | 1 ES | 2020-15 | 3 ES-Madrid | 3 | 4 | #####  | ##### |  |
| 56 | 1 ES | 2020-15 | 3 ES-Madrid | 3 | 5 | #####  | ##### |  |
| 57 | 1 ES | 2020-15 | 3 ES-Northe | 1 | 1 | #####  | ##### |  |
| 58 | 1 ES | 2020-15 | 3 ES-Northe | 1 | 2 | #####  | ##### |  |

1  
2  
3  
4  
5  
6  
7  
8  
9  
10  
11  
12  
13  
14  
15  
16  
17  
18  
19  
20  
21  
22  
23  
24  
25  
26  
27  
28  
29  
30  
31  
32  
33  
34  
35  
36  
37  
38  
39  
40  
41  
42  
43  
44  
45  
46  
47  
48  
49  
50  
51  
52  
53  
54  
55  
56  
57  
58  
59  
60

|      |         |              |   |   |       |       |
|------|---------|--------------|---|---|-------|-------|
| 1 ES | 2020-15 | 3 ES-Northea | 1 | 3 | ##### | ##### |
| 1 ES | 2020-15 | 3 ES-Northea | 1 | 4 | ##### | ##### |
| 1 ES | 2020-15 | 3 ES-Northea | 1 | 5 | 0     | 0     |
| 1 ES | 2020-15 | 3 ES-Northea | 2 | 1 | ##### | ##### |
| 1 ES | 2020-15 | 3 ES-Northea | 2 | 2 | 0     | 0     |
| 1 ES | 2020-15 | 3 ES-Northea | 2 | 3 | ##### | ##### |
| 1 ES | 2020-15 | 3 ES-Northea | 2 | 4 | 0     | 0     |
| 1 ES | 2020-15 | 3 ES-Northea | 2 | 5 | 0     | 0     |
| 1 ES | 2020-15 | 3 ES-Northea | 3 | 1 | ##### | ##### |
| 1 ES | 2020-15 | 3 ES-Northea | 3 | 2 | ##### | ##### |
| 1 ES | 2020-15 | 3 ES-Northea | 3 | 3 | 0     | 0     |
| 1 ES | 2020-15 | 3 ES-Northea | 3 | 4 | ##### | ##### |
| 1 ES | 2020-15 | 3 ES-Northea | 3 | 5 | 0     | 0     |
| 1 ES | 2020-15 | 3 ES-Northw  | 1 | 1 | ##### | ##### |
| 1 ES | 2020-15 | 3 ES-Northw  | 1 | 2 | 0     | 0     |
| 1 ES | 2020-15 | 3 ES-Northw  | 1 | 3 | ##### | ##### |
| 1 ES | 2020-15 | 3 ES-Northw  | 1 | 4 | ##### | ##### |
| 1 ES | 2020-15 | 3 ES-Northw  | 1 | 5 | ##### | ##### |
| 1 ES | 2020-15 | 3 ES-Northw  | 2 | 1 | ##### | ##### |
| 1 ES | 2020-15 | 3 ES-Northw  | 2 | 2 | 0     | 0     |
| 1 ES | 2020-15 | 3 ES-Northw  | 2 | 3 | ##### | ##### |
| 1 ES | 2020-15 | 3 ES-Northw  | 2 | 4 | ##### | ##### |
| 1 ES | 2020-15 | 3 ES-Northw  | 2 | 5 | 0.25  | ##### |
| 1 ES | 2020-15 | 3 ES-Northw  | 3 | 1 | 0     | 0     |
| 1 ES | 2020-15 | 3 ES-Northw  | 3 | 2 | 0     | 0     |
| 1 ES | 2020-15 | 3 ES-Northw  | 3 | 3 | 0     | 0     |
| 1 ES | 2020-15 | 3 ES-Northw  | 3 | 4 | 0     | 0     |
| 1 ES | 2020-15 | 3 ES-Northw  | 3 | 5 | 0     | 0     |
| 1 ES | 2020-15 | 3 ES-Overall | 1 | 1 | ##### | ##### |
| 1 ES | 2020-15 | 3 ES-Overall | 1 | 2 | ##### | ##### |
| 1 ES | 2020-15 | 3 ES-Overall | 1 | 3 | ##### | ##### |
| 1 ES | 2020-15 | 3 ES-Overall | 1 | 4 | ##### | ##### |
| 1 ES | 2020-15 | 3 ES-Overall | 1 | 5 | ##### | ##### |
| 1 ES | 2020-15 | 3 ES-Overall | 2 | 1 | ##### | ##### |
| 1 ES | 2020-15 | 3 ES-Overall | 2 | 2 | 0     | 0     |
| 1 ES | 2020-15 | 3 ES-Overall | 2 | 3 | ##### | ##### |
| 1 ES | 2020-15 | 3 ES-Overall | 2 | 4 | ##### | ##### |
| 1 ES | 2020-15 | 3 ES-Overall | 2 | 5 | ##### | ##### |
| 1 ES | 2020-15 | 3 ES-Overall | 3 | 1 | ##### | ##### |
| 1 ES | 2020-15 | 3 ES-Overall | 3 | 2 | ##### | ##### |
| 1 ES | 2020-15 | 3 ES-Overall | 3 | 3 | ##### | ##### |
| 1 ES | 2020-15 | 3 ES-Overall | 3 | 4 | ##### | ##### |
| 1 ES | 2020-15 | 3 ES-Overall | 3 | 5 | ##### | ##### |
| 1 ES | 2020-15 | 3 ES-South   | 1 | 1 | ##### | ##### |
| 1 ES | 2020-15 | 3 ES-South   | 1 | 2 | 0     | 0     |
| 1 ES | 2020-15 | 3 ES-South   | 1 | 3 | ##### | ##### |
| 1 ES | 2020-15 | 3 ES-South   | 1 | 4 | ##### | ##### |
| 1 ES | 2020-15 | 3 ES-South   | 1 | 5 | 0     | 0     |
| 1 ES | 2020-15 | 3 ES-South   | 2 | 1 | ##### | ##### |
| 1 ES | 2020-15 | 3 ES-South   | 2 | 2 | 0     | 0     |
| 1 ES | 2020-15 | 3 ES-South   | 2 | 3 | ##### | ##### |
| 1 ES | 2020-15 | 3 ES-South   | 2 | 4 | ##### | ##### |
| 1 ES | 2020-15 | 3 ES-South   | 2 | 5 | 0     | 0     |
| 1 ES | 2020-15 | 3 ES-South   | 3 | 1 | ##### | ##### |
| 1 ES | 2020-15 | 3 ES-South   | 3 | 2 | 0     | 0     |
| 1 ES | 2020-15 | 3 ES-South   | 3 | 3 | 0     | 0     |



|    |      |         |             |   |   |          |          |  |
|----|------|---------|-------------|---|---|----------|----------|--|
| 1  |      |         |             |   |   |          |          |  |
| 2  |      |         |             |   |   |          |          |  |
| 3  | 1 ES | 2020-15 | 3 ES-South  | 3 | 4 | #####    | #####    |  |
| 4  | 1 ES | 2020-15 | 3 ES-South  | 3 | 5 | 0        | 0        |  |
| 5  | 1 ES | 2020-15 | 4 ES-Center | 1 | 1 | 1.027708 | #####    |  |
| 6  | 1 ES | 2020-15 | 4 ES-Center | 1 | 2 | #####    | #####    |  |
| 7  | 1 ES | 2020-15 | 4 ES-Center | 1 | 3 | 2.06544  | #####    |  |
| 8  | 1 ES | 2020-15 | 4 ES-Center | 1 | 4 | 1.550941 | #####    |  |
| 9  | 1 ES | 2020-15 | 4 ES-Center | 1 | 5 | 0        | 0        |  |
| 10 | 1 ES | 2020-15 | 4 ES-Center | 2 | 1 | #####    | #####    |  |
| 11 | 1 ES | 2020-15 | 4 ES-Center | 2 | 2 | 1.375    | 1.205164 |  |
| 12 | 1 ES | 2020-15 | 4 ES-Center | 2 | 3 | 1.102941 | #####    |  |
| 13 | 1 ES | 2020-15 | 4 ES-Center | 2 | 4 | 1.565789 | #####    |  |
| 14 | 1 ES | 2020-15 | 4 ES-Center | 2 | 5 | 0        | 0        |  |
| 15 | 1 ES | 2020-15 | 4 ES-Center | 3 | 1 | 1.217016 | #####    |  |
| 16 | 1 ES | 2020-15 | 4 ES-Center | 3 | 2 | 0        | 0        |  |
| 17 | 1 ES | 2020-15 | 4 ES-Center | 3 | 3 | 3.411765 | 1.580868 |  |
| 18 | 1 ES | 2020-15 | 4 ES-Center | 3 | 4 | 1.535714 | #####    |  |
| 19 | 1 ES | 2020-15 | 4 ES-Center | 3 | 5 | 0        | 0        |  |
| 20 | 1 ES | 2020-15 | 4 ES-Center | 3 | 5 | 0        | 0        |  |
| 21 | 1 ES | 2020-15 | 4 ES-East   | 1 | 1 | #####    | #####    |  |
| 22 | 1 ES | 2020-15 | 4 ES-East   | 1 | 2 | 0        | 0        |  |
| 23 | 1 ES | 2020-15 | 4 ES-East   | 1 | 3 | 1.193804 | #####    |  |
| 24 | 1 ES | 2020-15 | 4 ES-East   | 1 | 4 | #####    | #####    |  |
| 25 | 1 ES | 2020-15 | 4 ES-East   | 1 | 5 | 0        | 0        |  |
| 26 | 1 ES | 2020-15 | 4 ES-East   | 2 | 1 | #####    | #####    |  |
| 27 | 1 ES | 2020-15 | 4 ES-East   | 2 | 2 | 0        | 0        |  |
| 28 | 1 ES | 2020-15 | 4 ES-East   | 2 | 3 | 1.307692 | #####    |  |
| 29 | 1 ES | 2020-15 | 4 ES-East   | 2 | 4 | #####    | #####    |  |
| 30 | 1 ES | 2020-15 | 4 ES-East   | 2 | 5 | 0        | 0        |  |
| 31 | 1 ES | 2020-15 | 4 ES-East   | 3 | 1 | #####    | #####    |  |
| 32 | 1 ES | 2020-15 | 4 ES-East   | 3 | 2 | 0        | 0        |  |
| 33 | 1 ES | 2020-15 | 4 ES-East   | 3 | 3 | 1.090909 | #####    |  |
| 34 | 1 ES | 2020-15 | 4 ES-East   | 3 | 4 | #####    | #####    |  |
| 35 | 1 ES | 2020-15 | 4 ES-East   | 3 | 5 | 0        | 0        |  |
| 36 | 1 ES | 2020-15 | 4 ES-Island | 1 | 1 | 1.089696 | #####    |  |
| 37 | 1 ES | 2020-15 | 4 ES-Island | 1 | 2 | 0        | 0        |  |
| 38 | 1 ES | 2020-15 | 4 ES-Island | 1 | 3 | 1.570681 | #####    |  |
| 39 | 1 ES | 2020-15 | 4 ES-Island | 1 | 4 | 1.492549 | #####    |  |
| 40 | 1 ES | 2020-15 | 4 ES-Island | 1 | 5 | 0        | 0        |  |
| 41 | 1 ES | 2020-15 | 4 ES-Island | 2 | 1 | #####    | #####    |  |
| 42 | 1 ES | 2020-15 | 4 ES-Island | 2 | 2 | 0        | 0        |  |
| 43 | 1 ES | 2020-15 | 4 ES-Island | 2 | 3 | 2.15     | 1.446294 |  |
| 44 | 1 ES | 2020-15 | 4 ES-Island | 2 | 4 | #####    | #####    |  |
| 45 | 1 ES | 2020-15 | 4 ES-Island | 2 | 5 | 0        | 0        |  |
| 46 | 1 ES | 2020-15 | 4 ES-Island | 3 | 1 | 1.232743 | #####    |  |
| 47 | 1 ES | 2020-15 | 4 ES-Island | 3 | 2 | 0        | 0        |  |
| 48 | 1 ES | 2020-15 | 4 ES-Island | 3 | 3 | 1.111111 | 1.047663 |  |
| 49 | 1 ES | 2020-15 | 4 ES-Island | 3 | 4 | 2.466667 | 1.146567 |  |
| 50 | 1 ES | 2020-15 | 4 ES-Island | 3 | 5 | 0        | 0        |  |
| 51 | 1 ES | 2020-15 | 4 ES-Madrid | 1 | 1 | #####    | #####    |  |
| 52 | 1 ES | 2020-15 | 4 ES-Madrid | 1 | 2 | 1.856298 | 1.111706 |  |
| 53 | 1 ES | 2020-15 | 4 ES-Madrid | 1 | 3 | #####    | #####    |  |
| 54 | 1 ES | 2020-15 | 4 ES-Madrid | 1 | 4 | #####    | #####    |  |
| 55 | 1 ES | 2020-15 | 4 ES-Madrid | 1 | 5 | #####    | #####    |  |
| 56 | 1 ES | 2020-15 | 4 ES-Madrid | 2 | 1 | #####    | #####    |  |
| 57 | 1 ES | 2020-15 | 4 ES-Madrid | 2 | 2 | 5        | 2.449718 |  |
| 58 | 1 ES | 2020-15 | 4 ES-Madrid | 2 | 3 | 1.11828  | #####    |  |
| 59 | 1 ES | 2020-15 | 4 ES-Madrid | 2 | 4 | #####    | #####    |  |
| 60 | 1 ES | 2020-15 | 4 ES-Madrid | 2 | 4 | #####    | #####    |  |

|    |      |         |              |   |   |          |          |  |
|----|------|---------|--------------|---|---|----------|----------|--|
| 1  |      |         |              |   |   |          |          |  |
| 2  |      |         |              |   |   |          |          |  |
| 3  | 1 ES | 2020-15 | 4 ES-Madrid  | 2 | 5 | 0.03125  | #####    |  |
| 4  | 1 ES | 2020-15 | 4 ES-Madrid  | 3 | 1 | #####    | #####    |  |
| 5  | 1 ES | 2020-15 | 4 ES-Madrid  | 3 | 2 | 0        | 0        |  |
| 6  | 1 ES | 2020-15 | 4 ES-Madrid  | 3 | 3 | #####    | #####    |  |
| 7  | 1 ES | 2020-15 | 4 ES-Madrid  | 3 | 4 | 1.173913 | #####    |  |
| 8  | 1 ES | 2020-15 | 4 ES-Madrid  | 3 | 5 | #####    | #####    |  |
| 9  | 1 ES | 2020-15 | 4 ES-Northea | 1 | 1 | #####    | #####    |  |
| 10 | 1 ES | 2020-15 | 4 ES-Northea | 1 | 2 | #####    | #####    |  |
| 11 | 1 ES | 2020-15 | 4 ES-Northea | 1 | 3 | 1.064833 | #####    |  |
| 12 | 1 ES | 2020-15 | 4 ES-Northea | 1 | 4 | #####    | #####    |  |
| 13 | 1 ES | 2020-15 | 4 ES-Northea | 1 | 5 | 0        | 0        |  |
| 14 | 1 ES | 2020-15 | 4 ES-Northea | 2 | 1 | #####    | #####    |  |
| 15 | 1 ES | 2020-15 | 4 ES-Northea | 2 | 2 | 2.083333 | 1.994826 |  |
| 16 | 1 ES | 2020-15 | 4 ES-Northea | 2 | 3 | 1.202703 | #####    |  |
| 17 | 1 ES | 2020-15 | 4 ES-Northea | 2 | 4 | 1.101449 | #####    |  |
| 18 | 1 ES | 2020-15 | 4 ES-Northea | 2 | 5 | 0        | 0        |  |
| 19 | 1 ES | 2020-15 | 4 ES-Northea | 3 | 1 | #####    | #####    |  |
| 20 | 1 ES | 2020-15 | 4 ES-Northea | 3 | 2 | 0        | 0        |  |
| 21 | 1 ES | 2020-15 | 4 ES-Northea | 3 | 3 | #####    | #####    |  |
| 22 | 1 ES | 2020-15 | 4 ES-Northea | 3 | 4 | #####    | #####    |  |
| 23 | 1 ES | 2020-15 | 4 ES-Northea | 3 | 5 | 0        | 0        |  |
| 24 | 1 ES | 2020-15 | 4 ES-Northea | 3 | 5 | 0        | 0        |  |
| 25 | 1 ES | 2020-15 | 4 ES-Northw  | 1 | 1 | #####    | #####    |  |
| 26 | 1 ES | 2020-15 | 4 ES-Northw  | 1 | 2 | 0        | 0        |  |
| 27 | 1 ES | 2020-15 | 4 ES-Northw  | 1 | 3 | #####    | #####    |  |
| 28 | 1 ES | 2020-15 | 4 ES-Northw  | 1 | 4 | 1.578052 | #####    |  |
| 29 | 1 ES | 2020-15 | 4 ES-Northw  | 1 | 5 | #####    | #####    |  |
| 30 | 1 ES | 2020-15 | 4 ES-Northw  | 2 | 1 | #####    | #####    |  |
| 31 | 1 ES | 2020-15 | 4 ES-Northw  | 2 | 2 | 0        | 0        |  |
| 32 | 1 ES | 2020-15 | 4 ES-Northw  | 2 | 3 | 1.878378 | #####    |  |
| 33 | 1 ES | 2020-15 | 4 ES-Northw  | 2 | 4 | 1.320513 | #####    |  |
| 34 | 1 ES | 2020-15 | 4 ES-Northw  | 2 | 5 | 0.1      | #####    |  |
| 35 | 1 ES | 2020-15 | 4 ES-Northw  | 3 | 1 | #####    | #####    |  |
| 36 | 1 ES | 2020-15 | 4 ES-Northw  | 3 | 2 | 0        | 0        |  |
| 37 | 1 ES | 2020-15 | 4 ES-Northw  | 3 | 3 | 0.125    | #####    |  |
| 38 | 1 ES | 2020-15 | 4 ES-Northw  | 3 | 4 | 1.837838 | #####    |  |
| 39 | 1 ES | 2020-15 | 4 ES-Northw  | 3 | 5 | 0        | 0        |  |
| 40 | 1 ES | 2020-15 | 4 ES-Overall | 1 | 1 | #####    | #####    |  |
| 41 | 1 ES | 2020-15 | 4 ES-Overall | 1 | 2 | #####    | #####    |  |
| 42 | 1 ES | 2020-15 | 4 ES-Overall | 1 | 3 | 1.341415 | #####    |  |
| 43 | 1 ES | 2020-15 | 4 ES-Overall | 1 | 4 | 1.001881 | #####    |  |
| 44 | 1 ES | 2020-15 | 4 ES-Overall | 1 | 5 | #####    | #####    |  |
| 45 | 1 ES | 2020-15 | 4 ES-Overall | 2 | 1 | #####    | #####    |  |
| 46 | 1 ES | 2020-15 | 4 ES-Overall | 2 | 2 | #####    | #####    |  |
| 47 | 1 ES | 2020-15 | 4 ES-Overall | 2 | 3 | 1.205847 | #####    |  |
| 48 | 1 ES | 2020-15 | 4 ES-Overall | 2 | 4 | #####    | #####    |  |
| 49 | 1 ES | 2020-15 | 4 ES-Overall | 2 | 5 | #####    | #####    |  |
| 50 | 1 ES | 2020-15 | 4 ES-Overall | 3 | 1 | #####    | #####    |  |
| 51 | 1 ES | 2020-15 | 4 ES-Overall | 3 | 2 | 0        | 0        |  |
| 52 | 1 ES | 2020-15 | 4 ES-Overall | 3 | 3 | 1.483698 | #####    |  |
| 53 | 1 ES | 2020-15 | 4 ES-Overall | 3 | 4 | 1.046505 | #####    |  |
| 54 | 1 ES | 2020-15 | 4 ES-Overall | 3 | 5 | #####    | #####    |  |
| 55 | 1 ES | 2020-15 | 4 ES-South   | 1 | 1 | #####    | #####    |  |
| 56 | 1 ES | 2020-15 | 4 ES-South   | 1 | 2 | 0        | 0        |  |
| 57 | 1 ES | 2020-15 | 4 ES-South   | 1 | 3 | 1.713273 | #####    |  |
| 58 | 1 ES | 2020-15 | 4 ES-South   | 1 | 4 | 0.982451 | #####    |  |
| 59 | 1 ES | 2020-15 | 4 ES-South   | 1 | 5 | 0        | 0        |  |
| 60 | 1 ES | 2020-15 | 4 ES-South   | 1 | 5 | 0        | 0        |  |

|    |      |         |             |   |   |          |          |
|----|------|---------|-------------|---|---|----------|----------|
| 1  |      |         |             |   |   |          |          |
| 2  |      |         |             |   |   |          |          |
| 3  | 1 ES | 2020-15 | 4 ES-South  | 2 | 1 | #####    | #####    |
| 4  | 1 ES | 2020-15 | 4 ES-South  | 2 | 2 | 0        | 0        |
| 5  | 1 ES | 2020-15 | 4 ES-South  | 2 | 3 | #####    | #####    |
| 6  | 1 ES | 2020-15 | 4 ES-South  | 2 | 4 | 1.064516 | #####    |
| 7  | 1 ES | 2020-15 | 4 ES-South  | 2 | 5 | 0        | 0        |
| 8  | 1 ES | 2020-15 | 4 ES-South  | 3 | 1 | 1.305525 | #####    |
| 9  | 1 ES | 2020-15 | 4 ES-South  | 3 | 2 | 0        | 0        |
| 10 | 1 ES | 2020-15 | 4 ES-South  | 3 | 3 | 2.75     | 1.481481 |
| 11 | 1 ES | 2020-15 | 4 ES-South  | 3 | 4 | #####    | #####    |
| 12 | 1 ES | 2020-15 | 4 ES-South  | 3 | 5 | 0        | 0        |
| 13 | 1 ES | 2020-15 | 5 ES-Center | 1 | 1 | #####    | #####    |
| 14 | 1 ES | 2020-15 | 5 ES-Center | 1 | 2 | #####    | #####    |
| 15 | 1 ES | 2020-15 | 5 ES-Center | 1 | 3 | #####    | #####    |
| 16 | 1 ES | 2020-15 | 5 ES-Center | 1 | 4 | 1.179761 | #####    |
| 17 | 1 ES | 2020-15 | 5 ES-Center | 1 | 5 | #####    | #####    |
| 18 | 1 ES | 2020-15 | 5 ES-Center | 2 | 1 | #####    | #####    |
| 19 | 1 ES | 2020-15 | 5 ES-Center | 2 | 2 | 0.5      | #####    |
| 20 | 1 ES | 2020-15 | 5 ES-Center | 2 | 3 | 1        | #####    |
| 21 | 1 ES | 2020-15 | 5 ES-Center | 2 | 4 | 1.35443  | #####    |
| 22 | 1 ES | 2020-15 | 5 ES-Center | 2 | 5 | #####    | #####    |
| 23 | 1 ES | 2020-15 | 5 ES-Center | 3 | 1 | #####    | #####    |
| 24 | 1 ES | 2020-15 | 5 ES-Center | 3 | 2 | 1        | #####    |
| 25 | 1 ES | 2020-15 | 5 ES-Center | 3 | 3 | #####    | #####    |
| 26 | 1 ES | 2020-15 | 5 ES-Center | 3 | 4 | 1        | #####    |
| 27 | 1 ES | 2020-15 | 5 ES-Center | 3 | 5 | 1.26087  | #####    |
| 28 | 1 ES | 2020-15 | 5 ES-East   | 1 | 1 | #####    | #####    |
| 29 | 1 ES | 2020-15 | 5 ES-East   | 1 | 2 | #####    | #####    |
| 30 | 1 ES | 2020-15 | 5 ES-East   | 1 | 3 | 1.225146 | #####    |
| 31 | 1 ES | 2020-15 | 5 ES-East   | 1 | 4 | #####    | #####    |
| 32 | 1 ES | 2020-15 | 5 ES-East   | 1 | 5 | #####    | #####    |
| 33 | 1 ES | 2020-15 | 5 ES-East   | 2 | 1 | #####    | #####    |
| 34 | 1 ES | 2020-15 | 5 ES-East   | 2 | 2 | #####    | #####    |
| 35 | 1 ES | 2020-15 | 5 ES-East   | 2 | 3 | #####    | #####    |
| 36 | 1 ES | 2020-15 | 5 ES-East   | 2 | 4 | #####    | #####    |
| 37 | 1 ES | 2020-15 | 5 ES-East   | 2 | 5 | #####    | #####    |
| 38 | 1 ES | 2020-15 | 5 ES-East   | 2 | 5 | #####    | #####    |
| 39 | 1 ES | 2020-15 | 5 ES-East   | 3 | 1 | 1.079353 | #####    |
| 40 | 1 ES | 2020-15 | 5 ES-East   | 3 | 2 | #####    | #####    |
| 41 | 1 ES | 2020-15 | 5 ES-East   | 3 | 3 | 1.636364 | #####    |
| 42 | 1 ES | 2020-15 | 5 ES-East   | 3 | 4 | #####    | #####    |
| 43 | 1 ES | 2020-15 | 5 ES-East   | 3 | 5 | #####    | #####    |
| 44 | 1 ES | 2020-15 | 5 ES-Island | 1 | 1 | 1.33261  | #####    |
| 45 | 1 ES | 2020-15 | 5 ES-Island | 1 | 2 | 1.655378 | #####    |
| 46 | 1 ES | 2020-15 | 5 ES-Island | 1 | 3 | 1.129838 | #####    |
| 47 | 1 ES | 2020-15 | 5 ES-Island | 1 | 4 | 1.588456 | #####    |
| 48 | 1 ES | 2020-15 | 5 ES-Island | 1 | 5 | #####    | #####    |
| 49 | 1 ES | 2020-15 | 5 ES-Island | 2 | 1 | 1.449452 | #####    |
| 50 | 1 ES | 2020-15 | 5 ES-Island | 2 | 2 | 1.857143 | #####    |
| 51 | 1 ES | 2020-15 | 5 ES-Island | 2 | 3 | 1.285714 | #####    |
| 52 | 1 ES | 2020-15 | 5 ES-Island | 2 | 4 | 1.717391 | #####    |
| 53 | 1 ES | 2020-15 | 5 ES-Island | 2 | 5 | 0.7      | #####    |
| 54 | 1 ES | 2020-15 | 5 ES-Island | 3 | 1 | 1.202497 | #####    |
| 55 | 1 ES | 2020-15 | 5 ES-Island | 3 | 2 | 1.5      | 1.060759 |
| 56 | 1 ES | 2020-15 | 5 ES-Island | 3 | 3 | 1        | #####    |
| 57 | 1 ES | 2020-15 | 5 ES-Island | 3 | 4 | 1.4      | #####    |
| 58 | 1 ES | 2020-15 | 5 ES-Island | 3 | 5 | #####    | #####    |
| 59 | 1 ES | 2020-15 | 5 ES-Madrid | 1 | 1 | 1.172237 | #####    |
| 60 | 1 ES | 2020-15 | 5 ES-Madrid | 1 | 1 | 1.172237 | #####    |

1  
2  
3  
4  
5  
6  
7  
8  
9  
10  
11  
12  
13  
14  
15  
16  
17  
18  
19  
20  
21  
22  
23  
24  
25  
26  
27  
28  
29  
30  
31  
32  
33  
34  
35  
36  
37  
38  
39  
40  
41  
42  
43  
44  
45  
46  
47  
48  
49  
50  
51  
52  
53  
54  
55  
56  
57  
58  
59  
60

|      |         |              |   |   |          |       |
|------|---------|--------------|---|---|----------|-------|
| 1 ES | 2020-15 | 5 ES-Madrid  | 1 | 2 | #####    | ##### |
| 1 ES | 2020-15 | 5 ES-Madrid  | 1 | 3 | #####    | ##### |
| 1 ES | 2020-15 | 5 ES-Madrid  | 1 | 4 | 1.323677 | ##### |
| 1 ES | 2020-15 | 5 ES-Madrid  | 1 | 5 | 1.809742 | ##### |
| 1 ES | 2020-15 | 5 ES-Madrid  | 2 | 1 | 1.243659 | ##### |
| 1 ES | 2020-15 | 5 ES-Madrid  | 2 | 2 | 1        | ##### |
| 1 ES | 2020-15 | 5 ES-Madrid  | 2 | 3 | 1.030928 | ##### |
| 1 ES | 2020-15 | 5 ES-Madrid  | 2 | 4 | 1.113208 | ##### |
| 1 ES | 2020-15 | 5 ES-Madrid  | 2 | 5 | 1.75     | ##### |
| 1 ES | 2020-15 | 5 ES-Madrid  | 3 | 1 | 1.081856 | ##### |
| 1 ES | 2020-15 | 5 ES-Madrid  | 3 | 2 | 0        | 0     |
| 1 ES | 2020-15 | 5 ES-Madrid  | 3 | 3 | #####    | ##### |
| 1 ES | 2020-15 | 5 ES-Madrid  | 3 | 4 | 1.604167 | ##### |
| 1 ES | 2020-15 | 5 ES-Madrid  | 3 | 5 | 1.941176 | ##### |
| 1 ES | 2020-15 | 5 ES-Northea | 1 | 1 | 1.078188 | ##### |
| 1 ES | 2020-15 | 5 ES-Northea | 1 | 2 | #####    | ##### |
| 1 ES | 2020-15 | 5 ES-Northea | 1 | 3 | 1.231912 | ##### |
| 1 ES | 2020-15 | 5 ES-Northea | 1 | 4 | 1.215273 | ##### |
| 1 ES | 2020-15 | 5 ES-Northea | 1 | 5 | 1.143567 | ##### |
| 1 ES | 2020-15 | 5 ES-Northea | 2 | 1 | #####    | ##### |
| 1 ES | 2020-15 | 5 ES-Northea | 2 | 2 | #####    | ##### |
| 1 ES | 2020-15 | 5 ES-Northea | 2 | 3 | 1.289474 | ##### |
| 1 ES | 2020-15 | 5 ES-Northea | 2 | 4 | #####    | ##### |
| 1 ES | 2020-15 | 5 ES-Northea | 2 | 5 | 0.4375   | ##### |
| 1 ES | 2020-15 | 5 ES-Northea | 3 | 1 | 1.408205 | ##### |
| 1 ES | 2020-15 | 5 ES-Northea | 3 | 2 | 0.5      | ##### |
| 1 ES | 2020-15 | 5 ES-Northea | 3 | 3 | 1.142857 | ##### |
| 1 ES | 2020-15 | 5 ES-Northea | 3 | 4 | 1.673913 | ##### |
| 1 ES | 2020-15 | 5 ES-Northea | 3 | 5 | 2.307692 | ##### |
| 1 ES | 2020-15 | 5 ES-Northw  | 1 | 1 | #####    | ##### |
| 1 ES | 2020-15 | 5 ES-Northw  | 1 | 2 | #####    | ##### |
| 1 ES | 2020-15 | 5 ES-Northw  | 1 | 3 | #####    | ##### |
| 1 ES | 2020-15 | 5 ES-Northw  | 1 | 4 | #####    | ##### |
| 1 ES | 2020-15 | 5 ES-Northw  | 1 | 5 | 1.294277 | ##### |
| 1 ES | 2020-15 | 5 ES-Northw  | 2 | 1 | #####    | ##### |
| 1 ES | 2020-15 | 5 ES-Northw  | 2 | 2 | #####    | ##### |
| 1 ES | 2020-15 | 5 ES-Northw  | 2 | 3 | #####    | ##### |
| 1 ES | 2020-15 | 5 ES-Northw  | 2 | 4 | 0.4875   | ##### |
| 1 ES | 2020-15 | 5 ES-Northw  | 2 | 5 | 1.6      | ##### |
| 1 ES | 2020-15 | 5 ES-Northw  | 3 | 1 | #####    | ##### |
| 1 ES | 2020-15 | 5 ES-Northw  | 3 | 2 | 3        | 0     |
| 1 ES | 2020-15 | 5 ES-Northw  | 3 | 3 | 0.64     | ##### |
| 1 ES | 2020-15 | 5 ES-Northw  | 3 | 4 | #####    | ##### |
| 1 ES | 2020-15 | 5 ES-Northw  | 3 | 5 | 0.85     | ##### |
| 1 ES | 2020-15 | 5 ES-Overall | 1 | 1 | #####    | ##### |
| 1 ES | 2020-15 | 5 ES-Overall | 1 | 2 | #####    | ##### |
| 1 ES | 2020-15 | 5 ES-Overall | 1 | 3 | 1.008653 | ##### |
| 1 ES | 2020-15 | 5 ES-Overall | 1 | 4 | 1.049434 | ##### |
| 1 ES | 2020-15 | 5 ES-Overall | 1 | 5 | 1.045083 | ##### |
| 1 ES | 2020-15 | 5 ES-Overall | 2 | 1 | #####    | ##### |
| 1 ES | 2020-15 | 5 ES-Overall | 2 | 2 | #####    | ##### |
| 1 ES | 2020-15 | 5 ES-Overall | 2 | 3 | #####    | ##### |
| 1 ES | 2020-15 | 5 ES-Overall | 2 | 4 | #####    | ##### |
| 1 ES | 2020-15 | 5 ES-Overall | 2 | 5 | 1.014711 | ##### |
| 1 ES | 2020-15 | 5 ES-Overall | 3 | 1 | 1.06464  | ##### |
| 1 ES | 2020-15 | 5 ES-Overall | 3 | 2 | #####    | ##### |

|    |      |         |               |   |   |          |          |  |  |
|----|------|---------|---------------|---|---|----------|----------|--|--|
| 1  |      |         |               |   |   |          |          |  |  |
| 2  |      |         |               |   |   |          |          |  |  |
| 3  | 1 ES | 2020-15 | 5 ES-Overall  | 3 | 3 | 1.168382 | #####    |  |  |
| 4  | 1 ES | 2020-15 | 5 ES-Overall  | 3 | 4 | 1.170849 | #####    |  |  |
| 5  | 1 ES | 2020-15 | 5 ES-Overall  | 3 | 5 | 1.087188 | #####    |  |  |
| 6  | 1 ES | 2020-15 | 5 ES-South    | 1 | 1 | 1.092174 | #####    |  |  |
| 7  | 1 ES | 2020-15 | 5 ES-South    | 1 | 2 | 1.216215 | #####    |  |  |
| 8  | 1 ES | 2020-15 | 5 ES-South    | 1 | 3 | #####    | #####    |  |  |
| 9  | 1 ES | 2020-15 | 5 ES-South    | 1 | 4 | 1.122818 | #####    |  |  |
| 10 | 1 ES | 2020-15 | 5 ES-South    | 1 | 5 | 1.174683 | #####    |  |  |
| 11 | 1 ES | 2020-15 | 5 ES-South    | 2 | 1 | 1.181098 | #####    |  |  |
| 12 | 1 ES | 2020-15 | 5 ES-South    | 2 | 2 | 2.416667 | 1.578905 |  |  |
| 13 | 1 ES | 2020-15 | 5 ES-South    | 2 | 3 | #####    | #####    |  |  |
| 14 | 1 ES | 2020-15 | 5 ES-South    | 2 | 4 | 1.150538 | #####    |  |  |
| 15 | 1 ES | 2020-15 | 5 ES-South    | 2 | 5 | 1.583333 | #####    |  |  |
| 16 | 1 ES | 2020-15 | 5 ES-South    | 3 | 1 | #####    | #####    |  |  |
| 17 | 1 ES | 2020-15 | 5 ES-South    | 3 | 2 | 0.25     | #####    |  |  |
| 18 | 1 ES | 2020-15 | 5 ES-South    | 3 | 3 | 1.368421 | #####    |  |  |
| 19 | 1 ES | 2020-15 | 5 ES-South    | 3 | 4 | 1.096154 | #####    |  |  |
| 20 | 1 ES | 2020-15 | 5 ES-South    | 3 | 5 | 0.5      | #####    |  |  |
| 21 | 1 FR | 2020-13 | 1 FR-Corse    | 1 | 1 | 1.337769 | 1.048361 |  |  |
| 22 | 1 FR | 2020-13 | 1 FR-Corse    | 1 | 2 | 3        | 0        |  |  |
| 23 | 1 FR | 2020-13 | 1 FR-Corse    | 1 | 5 | 0        | 0        |  |  |
| 24 | 1 FR | 2020-13 | 1 FR-Corse    | 2 | 1 | 1.337769 | 1.048361 |  |  |
| 25 | 1 FR | 2020-13 | 1 FR-Corse    | 2 | 2 | 3        | 0        |  |  |
| 26 | 1 FR | 2020-13 | 1 FR-Corse    | 2 | 5 | 0        | 0        |  |  |
| 27 | 1 FR | 2020-13 | 1 FR-Ile de F | 1 | 1 | 2.677386 | #####    |  |  |
| 28 | 1 FR | 2020-13 | 1 FR-Ile de F | 1 | 2 | 2.091321 | #####    |  |  |
| 29 | 1 FR | 2020-13 | 1 FR-Ile de F | 1 | 3 | 2.021613 | #####    |  |  |
| 30 | 1 FR | 2020-13 | 1 FR-Ile de F | 1 | 4 | 3.355889 | #####    |  |  |
| 31 | 1 FR | 2020-13 | 1 FR-Ile de F | 1 | 5 | 2.717665 | #####    |  |  |
| 32 | 1 FR | 2020-13 | 1 FR-Ile de F | 2 | 1 | 2.699659 | #####    |  |  |
| 33 | 1 FR | 2020-13 | 1 FR-Ile de F | 2 | 2 | 2.428571 | #####    |  |  |
| 34 | 1 FR | 2020-13 | 1 FR-Ile de F | 2 | 3 | 1.527778 | #####    |  |  |
| 35 | 1 FR | 2020-13 | 1 FR-Ile de F | 2 | 4 | 3.551724 | #####    |  |  |
| 36 | 1 FR | 2020-13 | 1 FR-Ile de F | 2 | 5 | 2.517241 | #####    |  |  |
| 37 | 1 FR | 2020-13 | 1 FR-Ile de F | 3 | 1 | 2.654457 | #####    |  |  |
| 38 | 1 FR | 2020-13 | 1 FR-Ile de F | 3 | 2 | 1.923077 | #####    |  |  |
| 39 | 1 FR | 2020-13 | 1 FR-Ile de F | 3 | 3 | 2.5      | #####    |  |  |
| 40 | 1 FR | 2020-13 | 1 FR-Ile de F | 3 | 4 | 3.090909 | #####    |  |  |
| 41 | 1 FR | 2020-13 | 1 FR-Ile de F | 3 | 5 | 2.944444 | 1.095761 |  |  |
| 42 | 1 FR | 2020-13 | 1 FR-North E  | 1 | 1 | 3.176345 | #####    |  |  |
| 43 | 1 FR | 2020-13 | 1 FR-North E  | 1 | 2 | 2.703496 | #####    |  |  |
| 44 | 1 FR | 2020-13 | 1 FR-North E  | 1 | 3 | 2.638575 | #####    |  |  |
| 45 | 1 FR | 2020-13 | 1 FR-North E  | 1 | 4 | 3.772164 | #####    |  |  |
| 46 | 1 FR | 2020-13 | 1 FR-North E  | 1 | 5 | 3.053363 | #####    |  |  |
| 47 | 1 FR | 2020-13 | 1 FR-North E  | 2 | 1 | 3.071972 | #####    |  |  |
| 48 | 1 FR | 2020-13 | 1 FR-North E  | 2 | 2 | 2.208333 | #####    |  |  |
| 49 | 1 FR | 2020-13 | 1 FR-North E  | 2 | 3 | 3.061728 | #####    |  |  |
| 50 | 1 FR | 2020-13 | 1 FR-North E  | 2 | 4 | 3.770833 | #####    |  |  |
| 51 | 1 FR | 2020-13 | 1 FR-North E  | 2 | 5 | 2.258065 | #####    |  |  |
| 52 | 1 FR | 2020-13 | 1 FR-North E  | 3 | 1 | 3.313666 | #####    |  |  |
| 53 | 1 FR | 2020-13 | 1 FR-North E  | 3 | 2 | 3.2      | #####    |  |  |
| 54 | 1 FR | 2020-13 | 1 FR-North E  | 3 | 3 | 2.086957 | #####    |  |  |
| 55 | 1 FR | 2020-13 | 1 FR-North E  | 3 | 4 | 3.774194 | 1.029041 |  |  |
| 56 | 1 FR | 2020-13 | 1 FR-North E  | 3 | 5 | 4        | 1.289906 |  |  |
| 57 | 1 FR | 2020-13 | 1 FR-Overall  | 1 | 1 | 2.843189 | #####    |  |  |
| 58 | 1 FR | 2020-13 | 1 FR-Overall  | 1 | 2 | 2.775335 | #####    |  |  |

|    |      |         |              |   |   |          |          |  |
|----|------|---------|--------------|---|---|----------|----------|--|
| 1  |      |         |              |   |   |          |          |  |
| 2  |      |         |              |   |   |          |          |  |
| 3  | 1 FR | 2020-13 | 1 FR-Overall | 1 | 3 | 2.99689  | #####    |  |
| 4  | 1 FR | 2020-13 | 1 FR-Overall | 1 | 4 | 3.277913 | #####    |  |
| 5  | 1 FR | 2020-13 | 1 FR-Overall | 1 | 5 | 2.166083 | #####    |  |
| 6  | 1 FR | 2020-13 | 1 FR-Overall | 2 | 1 | 2.854177 | #####    |  |
| 7  | 1 FR | 2020-13 | 1 FR-Overall | 2 | 2 | 2.855417 | #####    |  |
| 8  | 1 FR | 2020-13 | 1 FR-Overall | 2 | 3 | 3.032998 | #####    |  |
| 9  | 1 FR | 2020-13 | 1 FR-Overall | 2 | 4 | 3.322998 | #####    |  |
| 10 | 1 FR | 2020-13 | 1 FR-Overall | 2 | 5 | 2.055485 | #####    |  |
| 11 | 1 FR | 2020-13 | 1 FR-Overall | 3 | 1 | 2.829044 | #####    |  |
| 12 | 1 FR | 2020-13 | 1 FR-Overall | 3 | 2 | 2.712408 | #####    |  |
| 13 | 1 FR | 2020-13 | 1 FR-Overall | 3 | 3 | 2.944966 | #####    |  |
| 14 | 1 FR | 2020-13 | 1 FR-Overall | 3 | 4 | 3.215128 | #####    |  |
| 15 | 1 FR | 2020-13 | 1 FR-Overall | 3 | 5 | 2.309543 | #####    |  |
| 16 | 1 FR | 2020-13 | 1 FR-South E | 1 | 1 | 2.795633 | #####    |  |
| 17 | 1 FR | 2020-13 | 1 FR-South E | 1 | 2 | 2.455556 | 0.420912 |  |
| 18 | 1 FR | 2020-13 | 1 FR-South E | 1 | 3 | 3.351426 | #####    |  |
| 19 | 1 FR | 2020-13 | 1 FR-South E | 1 | 4 | 3.111897 | #####    |  |
| 20 | 1 FR | 2020-13 | 1 FR-South E | 1 | 5 | 2.074541 | #####    |  |
| 21 | 1 FR | 2020-13 | 1 FR-South E | 2 | 1 | 2.908405 | #####    |  |
| 22 | 1 FR | 2020-13 | 1 FR-South E | 2 | 2 | 3.333333 | #####    |  |
| 23 | 1 FR | 2020-13 | 1 FR-South E | 2 | 3 | 3.350649 | #####    |  |
| 24 | 1 FR | 2020-13 | 1 FR-South E | 2 | 4 | 3.232323 | #####    |  |
| 25 | 1 FR | 2020-13 | 1 FR-South E | 2 | 5 | 2.037736 | #####    |  |
| 26 | 1 FR | 2020-13 | 1 FR-South E | 3 | 1 | 2.630363 | #####    |  |
| 27 | 1 FR | 2020-13 | 1 FR-South E | 3 | 2 | 1.875    | #####    |  |
| 28 | 1 FR | 2020-13 | 1 FR-South E | 3 | 3 | 3.352941 | 1.401925 |  |
| 29 | 1 FR | 2020-13 | 1 FR-South E | 3 | 4 | 2.948718 | #####    |  |
| 30 | 1 FR | 2020-13 | 1 FR-South E | 3 | 5 | 2.142857 | #####    |  |
| 31 | 1 FR | 2020-13 | 1 FR-South V | 1 | 1 | 2.69714  | #####    |  |
| 32 | 1 FR | 2020-13 | 1 FR-South V | 1 | 2 | 2.850578 | #####    |  |
| 33 | 1 FR | 2020-13 | 1 FR-South V | 1 | 3 | 3.977807 | #####    |  |
| 34 | 1 FR | 2020-13 | 1 FR-South V | 1 | 4 | 3.030346 | #####    |  |
| 35 | 1 FR | 2020-13 | 1 FR-South V | 1 | 5 | 1.559406 | #####    |  |
| 36 | 1 FR | 2020-13 | 1 FR-South V | 2 | 1 | 2.580474 | #####    |  |
| 37 | 1 FR | 2020-13 | 1 FR-South V | 2 | 2 | 2.911765 | #####    |  |
| 38 | 1 FR | 2020-13 | 1 FR-South V | 2 | 3 | 3.483333 | #####    |  |
| 39 | 1 FR | 2020-13 | 1 FR-South V | 2 | 4 | 2.894231 | #####    |  |
| 40 | 1 FR | 2020-13 | 1 FR-South V | 2 | 5 | 1.603448 | #####    |  |
| 41 | 1 FR | 2020-13 | 1 FR-South V | 3 | 1 | 2.856613 | #####    |  |
| 42 | 1 FR | 2020-13 | 1 FR-South V | 3 | 2 | 2.777778 | #####    |  |
| 43 | 1 FR | 2020-13 | 1 FR-South V | 3 | 3 | 4.6875   | 2.186329 |  |
| 44 | 1 FR | 2020-13 | 1 FR-South V | 3 | 4 | 3.222222 | #####    |  |
| 45 | 1 FR | 2020-13 | 1 FR-South V | 3 | 5 | 1.5      | #####    |  |
| 46 | 1 FR | 2020-13 | 1 FR-West    | 1 | 1 | 2.873208 | #####    |  |
| 47 | 1 FR | 2020-13 | 1 FR-West    | 1 | 2 | 4.30649  | 1.081349 |  |
| 48 | 1 FR | 2020-13 | 1 FR-West    | 1 | 3 | 3.360882 | #####    |  |
| 49 | 1 FR | 2020-13 | 1 FR-West    | 1 | 4 | 3.088554 | #####    |  |
| 50 | 1 FR | 2020-13 | 1 FR-West    | 1 | 5 | 1.922536 | #####    |  |
| 51 | 1 FR | 2020-13 | 1 FR-West    | 2 | 1 | 3.001621 | #####    |  |
| 52 | 1 FR | 2020-13 | 1 FR-West    | 2 | 2 | 3.387097 | #####    |  |
| 53 | 1 FR | 2020-13 | 1 FR-West    | 2 | 3 | 3.617284 | #####    |  |
| 54 | 1 FR | 2020-13 | 1 FR-West    | 2 | 4 | 3.112245 | #####    |  |
| 55 | 1 FR | 2020-13 | 1 FR-West    | 2 | 5 | 2.215686 | #####    |  |
| 56 | 1 FR | 2020-13 | 1 FR-West    | 3 | 1 | 2.708622 | #####    |  |
| 57 | 1 FR | 2020-13 | 1 FR-West    | 3 | 2 | 5.1      | 1.835672 |  |
| 58 | 1 FR | 2020-13 | 1 FR-West    | 3 | 3 | 2.882353 | #####    |  |
| 59 | 1 FR | 2020-13 | 1 FR-West    | 3 |   |          |          |  |
| 60 | 1 FR | 2020-13 | 1 FR-West    | 3 |   |          |          |  |

|    |      |         |               |   |   |          |       |  |
|----|------|---------|---------------|---|---|----------|-------|--|
| 1  |      |         |               |   |   |          |       |  |
| 2  |      |         |               |   |   |          |       |  |
| 3  | 1 FR | 2020-13 | 1 FR-West     | 3 | 4 | 3.057143 | ##### |  |
| 4  | 1 FR | 2020-13 | 1 FR-West     | 3 | 5 | 1.612903 | ##### |  |
| 5  | 1 FR | 2020-13 | 2 FR-Corse    | 1 | 1 | #####    | ##### |  |
| 6  | 1 FR | 2020-13 | 2 FR-Corse    | 1 | 2 | 2        | 0     |  |
| 7  | 1 FR | 2020-13 | 2 FR-Corse    | 1 | 5 | 0        | 0     |  |
| 8  | 1 FR | 2020-13 | 2 FR-Corse    | 2 | 1 | #####    | ##### |  |
| 9  | 1 FR | 2020-13 | 2 FR-Corse    | 2 | 2 | 2        | 0     |  |
| 10 | 1 FR | 2020-13 | 2 FR-Corse    | 2 | 5 | 0        | 0     |  |
| 11 | 1 FR | 2020-13 | 2 FR-Ile de F | 1 | 1 | 1.24332  | ##### |  |
| 12 | 1 FR | 2020-13 | 2 FR-Ile de F | 1 | 2 | 2.017796 | ##### |  |
| 13 | 1 FR | 2020-13 | 2 FR-Ile de F | 1 | 3 | #####    | ##### |  |
| 14 | 1 FR | 2020-13 | 2 FR-Ile de F | 1 | 4 | 1.201244 | ##### |  |
| 15 | 1 FR | 2020-13 | 2 FR-Ile de F | 1 | 5 | 1.03661  | ##### |  |
| 16 | 1 FR | 2020-13 | 2 FR-Ile de F | 2 | 1 | 1.303596 | ##### |  |
| 17 | 1 FR | 2020-13 | 2 FR-Ile de F | 2 | 2 | 1.904762 | ##### |  |
| 18 | 1 FR | 2020-13 | 2 FR-Ile de F | 2 | 3 | 1.135135 | ##### |  |
| 19 | 1 FR | 2020-13 | 2 FR-Ile de F | 2 | 4 | 1.366667 | ##### |  |
| 20 | 1 FR | 2020-13 | 2 FR-Ile de F | 2 | 5 | 1.068966 | ##### |  |
| 21 | 1 FR | 2020-13 | 2 FR-Ile de F | 3 | 1 | 1.181777 | ##### |  |
| 22 | 1 FR | 2020-13 | 2 FR-Ile de F | 3 | 2 | 2.066667 | ##### |  |
| 23 | 1 FR | 2020-13 | 2 FR-Ile de F | 3 | 3 | 0.8125   | ##### |  |
| 24 | 1 FR | 2020-13 | 2 FR-Ile de F | 3 | 4 | #####    | ##### |  |
| 25 | 1 FR | 2020-13 | 2 FR-Ile de F | 3 | 5 | 1        | ##### |  |
| 26 | 1 FR | 2020-13 | 2 FR-North E  | 1 | 1 | 1.433745 | ##### |  |
| 27 | 1 FR | 2020-13 | 2 FR-North E  | 1 | 2 | 2.04738  | ##### |  |
| 28 | 1 FR | 2020-13 | 2 FR-North E  | 1 | 3 | 1.514719 | ##### |  |
| 29 | 1 FR | 2020-13 | 2 FR-North E  | 1 | 4 | 1.330457 | ##### |  |
| 30 | 1 FR | 2020-13 | 2 FR-North E  | 1 | 5 | 1.251768 | ##### |  |
| 31 | 1 FR | 2020-13 | 2 FR-North E  | 2 | 1 | 1.429202 | ##### |  |
| 32 | 1 FR | 2020-13 | 2 FR-North E  | 2 | 2 | 1.75     | ##### |  |
| 33 | 1 FR | 2020-13 | 2 FR-North E  | 2 | 3 | 1.928571 | ##### |  |
| 34 | 1 FR | 2020-13 | 2 FR-North E  | 2 | 4 | 1.43     | ##### |  |
| 35 | 1 FR | 2020-13 | 2 FR-North E  | 2 | 5 | #####    | ##### |  |
| 36 | 1 FR | 2020-13 | 2 FR-North E  | 3 | 1 | 1.439563 | ##### |  |
| 37 | 1 FR | 2020-13 | 2 FR-North E  | 3 | 2 | 2.363636 | ##### |  |
| 38 | 1 FR | 2020-13 | 2 FR-North E  | 3 | 3 | 1        | ##### |  |
| 39 | 1 FR | 2020-13 | 2 FR-North E  | 3 | 4 | 1.181818 | ##### |  |
| 40 | 1 FR | 2020-13 | 2 FR-North E  | 3 | 5 | 1.833333 | ##### |  |
| 41 | 1 FR | 2020-13 | 2 FR-Overall  | 1 | 1 | 1.307461 | ##### |  |
| 42 | 1 FR | 2020-13 | 2 FR-Overall  | 1 | 2 | 1.882769 | ##### |  |
| 43 | 1 FR | 2020-13 | 2 FR-Overall  | 1 | 3 | 1.446804 | ##### |  |
| 44 | 1 FR | 2020-13 | 2 FR-Overall  | 1 | 4 | 1.292579 | ##### |  |
| 45 | 1 FR | 2020-13 | 2 FR-Overall  | 1 | 5 | #####    | ##### |  |
| 46 | 1 FR | 2020-13 | 2 FR-Overall  | 2 | 1 | 1.355153 | ##### |  |
| 47 | 1 FR | 2020-13 | 2 FR-Overall  | 2 | 2 | 1.742599 | ##### |  |
| 48 | 1 FR | 2020-13 | 2 FR-Overall  | 2 | 3 | 1.732835 | ##### |  |
| 49 | 1 FR | 2020-13 | 2 FR-Overall  | 2 | 4 | 1.372429 | ##### |  |
| 50 | 1 FR | 2020-13 | 2 FR-Overall  | 2 | 5 | #####    | ##### |  |
| 51 | 1 FR | 2020-13 | 2 FR-Overall  | 3 | 1 | 1.246268 | ##### |  |
| 52 | 1 FR | 2020-13 | 2 FR-Overall  | 3 | 2 | 1.990601 | ##### |  |
| 53 | 1 FR | 2020-13 | 2 FR-Overall  | 3 | 3 | 1.040231 | ##### |  |
| 54 | 1 FR | 2020-13 | 2 FR-Overall  | 3 | 4 | 1.17923  | ##### |  |
| 55 | 1 FR | 2020-13 | 2 FR-Overall  | 3 | 5 | 1.080242 | ##### |  |
| 56 | 1 FR | 2020-13 | 2 FR-South E  | 1 | 1 | 1.383105 | ##### |  |
| 57 | 1 FR | 2020-13 | 2 FR-South E  | 1 | 2 | 1.661429 | ##### |  |
| 58 | 1 FR | 2020-13 | 2 FR-South E  | 1 | 3 | 1.599424 | ##### |  |
| 59 | 1 FR | 2020-13 | 2 FR-South E  | 1 |   |          |       |  |
| 60 | 1 FR | 2020-13 | 2 FR-South E  | 1 |   |          |       |  |

1  
2  
3  
4  
5  
6  
7  
8  
9  
10  
11  
12  
13  
14  
15  
16  
17  
18  
19  
20  
21  
22  
23  
24  
25  
26  
27  
28  
29  
30  
31  
32  
33  
34  
35  
36  
37  
38  
39  
40  
41  
42  
43  
44  
45  
46  
47  
48  
49  
50  
51  
52  
53  
54  
55  
56  
57  
58  
59  
60

|      |         |               |   |   |          |       |   |  |
|------|---------|---------------|---|---|----------|-------|---|--|
| 1 FR | 2020-13 | 2 FR-South E  | 1 | 4 | 1.476581 | ##### |   |  |
| 1 FR | 2020-13 | 2 FR-South E  | 1 | 5 | #####    | ##### |   |  |
| 1 FR | 2020-13 | 2 FR-South E  | 2 | 1 | 1.45082  | ##### |   |  |
| 1 FR | 2020-13 | 2 FR-South E  | 2 | 2 | 2        | ##### |   |  |
| 1 FR | 2020-13 | 2 FR-South E  | 2 | 3 | 1.765432 | ##### |   |  |
| 1 FR | 2020-13 | 2 FR-South E  | 2 | 4 | 1.514851 | ##### |   |  |
| 1 FR | 2020-13 | 2 FR-South E  | 2 | 5 | #####    | ##### |   |  |
| 1 FR | 2020-13 | 2 FR-South E  | 3 | 1 | 1.283901 | ##### |   |  |
| 1 FR | 2020-13 | 2 FR-South E  | 3 | 2 | 1.4375   | ##### |   |  |
| 1 FR | 2020-13 | 2 FR-South E  | 3 | 3 | 1.277778 | ##### |   |  |
| 1 FR | 2020-13 | 2 FR-South E  | 3 | 4 | 1.425    | ##### |   |  |
| 1 FR | 2020-13 | 2 FR-South E  | 3 | 5 | #####    | ##### |   |  |
| 1 FR | 2020-13 | 2 FR-South V  | 1 | 1 | 1.215606 | ##### |   |  |
| 1 FR | 2020-13 | 2 FR-South V  | 1 | 2 | 1.856175 | ##### |   |  |
| 1 FR | 2020-13 | 2 FR-South V  | 1 | 3 | 1.462517 | ##### |   |  |
| 1 FR | 2020-13 | 2 FR-South V  | 1 | 4 | 1.233515 | ##### |   |  |
| 1 FR | 2020-13 | 2 FR-South V  | 1 | 5 | #####    | ##### |   |  |
| 1 FR | 2020-13 | 2 FR-South V  | 2 | 1 | 1.368359 | ##### |   |  |
| 1 FR | 2020-13 | 2 FR-South V  | 2 | 2 | 1.735294 | ##### |   |  |
| 1 FR | 2020-13 | 2 FR-South V  | 2 | 3 | 1.95082  | ##### |   |  |
| 1 FR | 2020-13 | 2 FR-South V  | 2 | 4 | 1.333333 | ##### |   |  |
| 1 FR | 2020-13 | 2 FR-South V  | 2 | 5 | #####    | ##### |   |  |
| 1 FR | 2020-13 | 2 FR-South V  | 3 | 1 | 1.000967 | ##### |   |  |
| 1 FR | 2020-13 | 2 FR-South V  | 3 | 2 | 2        | ##### |   |  |
| 1 FR | 2020-13 | 2 FR-South V  | 3 | 3 | 0.75     | ##### |   |  |
| 1 FR | 2020-13 | 2 FR-South V  | 3 | 4 | 1.083333 | ##### |   |  |
| 1 FR | 2020-13 | 2 FR-South V  | 3 | 5 | 0.6875   | ##### |   |  |
| 1 FR | 2020-13 | 2 FR-West     | 1 | 1 | 1.261464 | ##### |   |  |
| 1 FR | 2020-13 | 2 FR-West     | 1 | 2 | 1.812277 | ##### |   |  |
| 1 FR | 2020-13 | 2 FR-West     | 1 | 3 | 1.699769 | ##### |   |  |
| 1 FR | 2020-13 | 2 FR-West     | 1 | 4 | 1.234639 | ##### |   |  |
| 1 FR | 2020-13 | 2 FR-West     | 1 | 5 | #####    | ##### |   |  |
| 1 FR | 2020-13 | 2 FR-West     | 2 | 1 | 1.225694 | ##### |   |  |
| 1 FR | 2020-13 | 2 FR-West     | 2 | 2 | 1.315789 | ##### |   |  |
| 1 FR | 2020-13 | 2 FR-West     | 2 | 3 | 1.858824 | ##### |   |  |
| 1 FR | 2020-13 | 2 FR-West     | 2 | 4 | 1.223301 | ##### |   |  |
| 1 FR | 2020-13 | 2 FR-West     | 2 | 5 | #####    | ##### |   |  |
| 1 FR | 2020-13 | 2 FR-West     | 3 | 1 | 1.307058 | ##### |   |  |
| 1 FR | 2020-13 | 2 FR-West     | 3 | 2 | 2.25     | ##### |   |  |
| 1 FR | 2020-13 | 2 FR-West     | 3 | 3 | 1.421053 | ##### |   |  |
| 1 FR | 2020-13 | 2 FR-West     | 3 | 4 | 1.25     | ##### |   |  |
| 1 FR | 2020-13 | 2 FR-West     | 3 | 5 | #####    | ##### |   |  |
| 1 FR | 2020-13 | 3 FR-Corse    | 1 | 1 | 0        |       | 0 |  |
| 1 FR | 2020-13 | 3 FR-Corse    | 1 | 2 | 0        |       | 0 |  |
| 1 FR | 2020-13 | 3 FR-Corse    | 1 | 5 | 0        |       | 0 |  |
| 1 FR | 2020-13 | 3 FR-Corse    | 2 | 1 | 0        |       | 0 |  |
| 1 FR | 2020-13 | 3 FR-Corse    | 2 | 2 | 0        |       | 0 |  |
| 1 FR | 2020-13 | 3 FR-Corse    | 2 | 5 | 0        |       | 0 |  |
| 1 FR | 2020-13 | 3 FR-Ile de F | 1 | 1 | #####    | ##### |   |  |
| 1 FR | 2020-13 | 3 FR-Ile de F | 1 | 2 | 0        |       | 0 |  |
| 1 FR | 2020-13 | 3 FR-Ile de F | 1 | 3 | 0        |       | 0 |  |
| 1 FR | 2020-13 | 3 FR-Ile de F | 1 | 4 | #####    | ##### |   |  |
| 1 FR | 2020-13 | 3 FR-Ile de F | 1 | 5 | 0        |       | 0 |  |
| 1 FR | 2020-13 | 3 FR-Ile de F | 2 | 1 | #####    | ##### |   |  |
| 1 FR | 2020-13 | 3 FR-Ile de F | 2 | 2 | 0        |       | 0 |  |
| 1 FR | 2020-13 | 3 FR-Ile de F | 2 | 3 | 0        |       | 0 |  |



|    |      |         |               |   |   |       |       |
|----|------|---------|---------------|---|---|-------|-------|
| 1  |      |         |               |   |   |       |       |
| 2  |      |         |               |   |   |       |       |
| 3  | 1 FR | 2020-13 | 3 FR-Ile de F | 2 | 4 | ##### | ##### |
| 4  | 1 FR | 2020-13 | 3 FR-Ile de F | 2 | 5 | 0     | 0     |
| 5  | 1 FR | 2020-13 | 3 FR-Ile de F | 3 | 1 | 0     | 0     |
| 6  | 1 FR | 2020-13 | 3 FR-Ile de F | 3 | 2 | 0     | 0     |
| 7  | 1 FR | 2020-13 | 3 FR-Ile de F | 3 | 3 | 0     | 0     |
| 8  | 1 FR | 2020-13 | 3 FR-Ile de F | 3 | 4 | 0     | 0     |
| 9  | 1 FR | 2020-13 | 3 FR-Ile de F | 3 | 5 | 0     | 0     |
| 10 | 1 FR | 2020-13 | 3 FR-North E  | 1 | 1 | ##### | ##### |
| 11 | 1 FR | 2020-13 | 3 FR-North E  | 1 | 2 | ##### | ##### |
| 12 | 1 FR | 2020-13 | 3 FR-North E  | 1 | 3 | ##### | ##### |
| 13 | 1 FR | 2020-13 | 3 FR-North E  | 1 | 4 | 0     | 0     |
| 14 | 1 FR | 2020-13 | 3 FR-North E  | 1 | 5 | ##### | ##### |
| 15 | 1 FR | 2020-13 | 3 FR-North E  | 2 | 1 | ##### | ##### |
| 16 | 1 FR | 2020-13 | 3 FR-North E  | 2 | 2 | 0     | 0     |
| 17 | 1 FR | 2020-13 | 3 FR-North E  | 2 | 3 | ##### | ##### |
| 18 | 1 FR | 2020-13 | 3 FR-North E  | 2 | 4 | 0     | 0     |
| 19 | 1 FR | 2020-13 | 3 FR-North E  | 2 | 5 | ##### | ##### |
| 20 | 1 FR | 2020-13 | 3 FR-North E  | 3 | 1 | ##### | ##### |
| 21 | 1 FR | 2020-13 | 3 FR-North E  | 3 | 2 | ##### | ##### |
| 22 | 1 FR | 2020-13 | 3 FR-North E  | 3 | 3 | 0     | 0     |
| 23 | 1 FR | 2020-13 | 3 FR-North E  | 3 | 4 | 0     | 0     |
| 24 | 1 FR | 2020-13 | 3 FR-North E  | 3 | 5 | ##### | ##### |
| 25 | 1 FR | 2020-13 | 3 FR-North E  | 3 | 1 | ##### | ##### |
| 26 | 1 FR | 2020-13 | 3 FR-Overall  | 1 | 2 | ##### | ##### |
| 27 | 1 FR | 2020-13 | 3 FR-Overall  | 1 | 3 | ##### | ##### |
| 28 | 1 FR | 2020-13 | 3 FR-Overall  | 1 | 4 | ##### | ##### |
| 29 | 1 FR | 2020-13 | 3 FR-Overall  | 1 | 5 | ##### | ##### |
| 30 | 1 FR | 2020-13 | 3 FR-Overall  | 1 | 1 | ##### | ##### |
| 31 | 1 FR | 2020-13 | 3 FR-Overall  | 2 | 2 | 0     | 0     |
| 32 | 1 FR | 2020-13 | 3 FR-Overall  | 2 | 3 | ##### | ##### |
| 33 | 1 FR | 2020-13 | 3 FR-Overall  | 2 | 4 | ##### | ##### |
| 34 | 1 FR | 2020-13 | 3 FR-Overall  | 2 | 5 | ##### | ##### |
| 35 | 1 FR | 2020-13 | 3 FR-Overall  | 2 | 1 | ##### | ##### |
| 36 | 1 FR | 2020-13 | 3 FR-Overall  | 3 | 2 | ##### | ##### |
| 37 | 1 FR | 2020-13 | 3 FR-Overall  | 3 | 3 | 0     | 0     |
| 38 | 1 FR | 2020-13 | 3 FR-Overall  | 3 | 4 | 0     | 0     |
| 39 | 1 FR | 2020-13 | 3 FR-Overall  | 3 | 5 | ##### | ##### |
| 40 | 1 FR | 2020-13 | 3 FR-Overall  | 3 | 1 | ##### | ##### |
| 41 | 1 FR | 2020-13 | 3 FR-South E  | 1 | 2 | 0     | 0     |
| 42 | 1 FR | 2020-13 | 3 FR-South E  | 1 | 3 | 0     | 0     |
| 43 | 1 FR | 2020-13 | 3 FR-South E  | 1 | 4 | 0     | 0     |
| 44 | 1 FR | 2020-13 | 3 FR-South E  | 1 | 5 | ##### | ##### |
| 45 | 1 FR | 2020-13 | 3 FR-South E  | 1 | 1 | ##### | ##### |
| 46 | 1 FR | 2020-13 | 3 FR-South E  | 2 | 2 | 0     | 0     |
| 47 | 1 FR | 2020-13 | 3 FR-South E  | 2 | 3 | 0     | 0     |
| 48 | 1 FR | 2020-13 | 3 FR-South E  | 2 | 4 | 0     | 0     |
| 49 | 1 FR | 2020-13 | 3 FR-South E  | 2 | 5 | ##### | ##### |
| 50 | 1 FR | 2020-13 | 3 FR-South E  | 2 | 1 | 0     | 0     |
| 51 | 1 FR | 2020-13 | 3 FR-South E  | 3 | 2 | 0     | 0     |
| 52 | 1 FR | 2020-13 | 3 FR-South E  | 3 | 3 | 0     | 0     |
| 53 | 1 FR | 2020-13 | 3 FR-South E  | 3 | 4 | 0     | 0     |
| 54 | 1 FR | 2020-13 | 3 FR-South E  | 3 | 5 | 0     | 0     |
| 55 | 1 FR | 2020-13 | 3 FR-South E  | 3 | 1 | ##### | ##### |
| 56 | 1 FR | 2020-13 | 3 FR-South V  | 1 | 2 | ##### | ##### |
| 57 | 1 FR | 2020-13 | 3 FR-South V  | 1 | 3 | ##### | ##### |
| 58 | 1 FR | 2020-13 | 3 FR-South V  | 1 | 4 | ##### | ##### |
| 59 | 1 FR | 2020-13 | 3 FR-South V  | 1 | 5 | 0     | 0     |
| 60 | 1 FR | 2020-13 | 3 FR-South V  | 1 | 1 | ##### | ##### |

1  
2  
3  
4  
5  
6  
7  
8  
9  
10  
11  
12  
13  
14  
15  
16  
17  
18  
19  
20  
21  
22  
23  
24  
25  
26  
27  
28  
29  
30  
31  
32  
33  
34  
35  
36  
37  
38  
39  
40  
41  
42  
43  
44  
45  
46  
47  
48  
49  
50  
51  
52  
53  
54  
55  
56  
57  
58  
59  
60

|      |         |               |   |   |          |       |
|------|---------|---------------|---|---|----------|-------|
| 1 FR | 2020-13 | 3 FR-South V  | 1 | 5 | 0        | 0     |
| 1 FR | 2020-13 | 3 FR-South V  | 2 | 1 | #####    | ##### |
| 1 FR | 2020-13 | 3 FR-South V  | 2 | 2 | 0        | 0     |
| 1 FR | 2020-13 | 3 FR-South V  | 2 | 3 | #####    | ##### |
| 1 FR | 2020-13 | 3 FR-South V  | 2 | 4 | #####    | ##### |
| 1 FR | 2020-13 | 3 FR-South V  | 2 | 5 | 0        | 0     |
| 1 FR | 2020-13 | 3 FR-South V  | 3 | 1 | #####    | ##### |
| 1 FR | 2020-13 | 3 FR-South V  | 3 | 2 | #####    | ##### |
| 1 FR | 2020-13 | 3 FR-South V  | 3 | 3 | 0        | 0     |
| 1 FR | 2020-13 | 3 FR-South V  | 3 | 4 | 0        | 0     |
| 1 FR | 2020-13 | 3 FR-South V  | 3 | 5 | 0        | 0     |
| 1 FR | 2020-13 | 3 FR-West     | 1 | 1 | #####    | ##### |
| 1 FR | 2020-13 | 3 FR-West     | 1 | 2 | 0        | 0     |
| 1 FR | 2020-13 | 3 FR-West     | 1 | 3 | #####    | ##### |
| 1 FR | 2020-13 | 3 FR-West     | 1 | 4 | #####    | ##### |
| 1 FR | 2020-13 | 3 FR-West     | 1 | 5 | 0        | 0     |
| 1 FR | 2020-13 | 3 FR-West     | 2 | 1 | #####    | ##### |
| 1 FR | 2020-13 | 3 FR-West     | 2 | 2 | 0        | 0     |
| 1 FR | 2020-13 | 3 FR-West     | 2 | 3 | #####    | ##### |
| 1 FR | 2020-13 | 3 FR-West     | 2 | 4 | #####    | ##### |
| 1 FR | 2020-13 | 3 FR-West     | 2 | 5 | 0        | 0     |
| 1 FR | 2020-13 | 3 FR-West     | 3 | 1 | 0        | 0     |
| 1 FR | 2020-13 | 3 FR-West     | 3 | 2 | 0        | 0     |
| 1 FR | 2020-13 | 3 FR-West     | 3 | 3 | 0        | 0     |
| 1 FR | 2020-13 | 3 FR-West     | 3 | 4 | 0        | 0     |
| 1 FR | 2020-13 | 3 FR-West     | 3 | 5 | 0        | 0     |
| 1 FR | 2020-13 | 4 FR-Corse    | 1 | 1 | 0        | 0     |
| 1 FR | 2020-13 | 4 FR-Corse    | 1 | 2 | 0        | 0     |
| 1 FR | 2020-13 | 4 FR-Corse    | 1 | 5 | 0        | 0     |
| 1 FR | 2020-13 | 4 FR-Corse    | 2 | 1 | 0        | 0     |
| 1 FR | 2020-13 | 4 FR-Corse    | 2 | 2 | 0        | 0     |
| 1 FR | 2020-13 | 4 FR-Corse    | 2 | 5 | 0        | 0     |
| 1 FR | 2020-13 | 4 FR-Ile de F | 1 | 1 | #####    | ##### |
| 1 FR | 2020-13 | 4 FR-Ile de F | 1 | 2 | 0        | 0     |
| 1 FR | 2020-13 | 4 FR-Ile de F | 1 | 3 | #####    | ##### |
| 1 FR | 2020-13 | 4 FR-Ile de F | 1 | 4 | 1.028143 | ##### |
| 1 FR | 2020-13 | 4 FR-Ile de F | 1 | 5 | #####    | ##### |
| 1 FR | 2020-13 | 4 FR-Ile de F | 2 | 1 | #####    | ##### |
| 1 FR | 2020-13 | 4 FR-Ile de F | 2 | 2 | 0        | 0     |
| 1 FR | 2020-13 | 4 FR-Ile de F | 2 | 3 | 0        | 0     |
| 1 FR | 2020-13 | 4 FR-Ile de F | 2 | 4 | 1.16092  | ##### |
| 1 FR | 2020-13 | 4 FR-Ile de F | 2 | 5 | #####    | ##### |
| 1 FR | 2020-13 | 4 FR-Ile de F | 3 | 1 | #####    | ##### |
| 1 FR | 2020-13 | 4 FR-Ile de F | 3 | 2 | 0        | 0     |
| 1 FR | 2020-13 | 4 FR-Ile de F | 3 | 3 | 0.25     | ##### |
| 1 FR | 2020-13 | 4 FR-Ile de F | 3 | 4 | #####    | ##### |
| 1 FR | 2020-13 | 4 FR-Ile de F | 3 | 5 | 0        | 0     |
| 1 FR | 2020-13 | 4 FR-North E  | 1 | 1 | #####    | ##### |
| 1 FR | 2020-13 | 4 FR-North E  | 1 | 2 | #####    | ##### |
| 1 FR | 2020-13 | 4 FR-North E  | 1 | 3 | #####    | ##### |
| 1 FR | 2020-13 | 4 FR-North E  | 1 | 4 | 1.654755 | ##### |
| 1 FR | 2020-13 | 4 FR-North E  | 1 | 5 | #####    | ##### |
| 1 FR | 2020-13 | 4 FR-North E  | 2 | 1 | #####    | ##### |
| 1 FR | 2020-13 | 4 FR-North E  | 2 | 2 | #####    | ##### |
| 1 FR | 2020-13 | 4 FR-North E  | 2 | 3 | #####    | ##### |
| 1 FR | 2020-13 | 4 FR-North E  | 2 | 4 | 1.604167 | ##### |

|    |      |         |              |   |   |          |          |  |
|----|------|---------|--------------|---|---|----------|----------|--|
| 1  |      |         |              |   |   |          |          |  |
| 2  |      |         |              |   |   |          |          |  |
| 3  | 1 FR | 2020-13 | 4 FR-North E | 2 | 5 | 0        | 0        |  |
| 4  | 1 FR | 2020-13 | 4 FR-North E | 3 | 1 | #####    | #####    |  |
| 5  | 1 FR | 2020-13 | 4 FR-North E | 3 | 2 | 0.3      | #####    |  |
| 6  | 1 FR | 2020-13 | 4 FR-North E | 3 | 3 | 1.173913 | #####    |  |
| 7  | 1 FR | 2020-13 | 4 FR-North E | 3 | 4 | 1.727273 | #####    |  |
| 8  | 1 FR | 2020-13 | 4 FR-North E | 3 | 5 | #####    | #####    |  |
| 9  | 1 FR | 2020-13 | 4 FR-Overall | 1 | 1 | #####    | #####    |  |
| 10 | 1 FR | 2020-13 | 4 FR-Overall | 1 | 2 | #####    | #####    |  |
| 11 | 1 FR | 2020-13 | 4 FR-Overall | 1 | 3 | #####    | #####    |  |
| 12 | 1 FR | 2020-13 | 4 FR-Overall | 1 | 4 | 1.014611 | #####    |  |
| 13 | 1 FR | 2020-13 | 4 FR-Overall | 1 | 5 | #####    | #####    |  |
| 14 | 1 FR | 2020-13 | 4 FR-Overall | 2 | 1 | #####    | #####    |  |
| 15 | 1 FR | 2020-13 | 4 FR-Overall | 2 | 2 | #####    | #####    |  |
| 16 | 1 FR | 2020-13 | 4 FR-Overall | 2 | 3 | #####    | #####    |  |
| 17 | 1 FR | 2020-13 | 4 FR-Overall | 2 | 4 | 1.026401 | #####    |  |
| 18 | 1 FR | 2020-13 | 4 FR-Overall | 2 | 5 | #####    | #####    |  |
| 19 | 1 FR | 2020-13 | 4 FR-Overall | 3 | 1 | #####    | #####    |  |
| 20 | 1 FR | 2020-13 | 4 FR-Overall | 3 | 2 | #####    | #####    |  |
| 21 | 1 FR | 2020-13 | 4 FR-Overall | 3 | 3 | 1.03218  | #####    |  |
| 22 | 1 FR | 2020-13 | 4 FR-Overall | 3 | 4 | #####    | #####    |  |
| 23 | 1 FR | 2020-13 | 4 FR-Overall | 3 | 5 | #####    | #####    |  |
| 24 | 1 FR | 2020-13 | 4 FR-Overall | 3 | 5 | #####    | #####    |  |
| 25 | 1 FR | 2020-13 | 4 FR-South E | 1 | 1 | #####    | #####    |  |
| 26 | 1 FR | 2020-13 | 4 FR-South E | 1 | 2 | #####    | #####    |  |
| 27 | 1 FR | 2020-13 | 4 FR-South E | 1 | 3 | 1.161822 | #####    |  |
| 28 | 1 FR | 2020-13 | 4 FR-South E | 1 | 4 | #####    | #####    |  |
| 29 | 1 FR | 2020-13 | 4 FR-South E | 1 | 5 | #####    | #####    |  |
| 30 | 1 FR | 2020-13 | 4 FR-South E | 2 | 1 | #####    | #####    |  |
| 31 | 1 FR | 2020-13 | 4 FR-South E | 2 | 2 | #####    | #####    |  |
| 32 | 1 FR | 2020-13 | 4 FR-South E | 2 | 3 | #####    | #####    |  |
| 33 | 1 FR | 2020-13 | 4 FR-South E | 2 | 4 | #####    | #####    |  |
| 34 | 1 FR | 2020-13 | 4 FR-South E | 2 | 5 | #####    | #####    |  |
| 35 | 1 FR | 2020-13 | 4 FR-South E | 3 | 1 | #####    | #####    |  |
| 36 | 1 FR | 2020-13 | 4 FR-South E | 3 | 2 | 0        | 0        |  |
| 37 | 1 FR | 2020-13 | 4 FR-South E | 3 | 3 | 1.555556 | 1.139269 |  |
| 38 | 1 FR | 2020-13 | 4 FR-South E | 3 | 4 | #####    | #####    |  |
| 39 | 1 FR | 2020-13 | 4 FR-South E | 3 | 5 | #####    | #####    |  |
| 40 | 1 FR | 2020-13 | 4 FR-South V | 1 | 1 | #####    | #####    |  |
| 41 | 1 FR | 2020-13 | 4 FR-South V | 1 | 2 | #####    | #####    |  |
| 42 | 1 FR | 2020-13 | 4 FR-South V | 1 | 3 | 1.217984 | #####    |  |
| 43 | 1 FR | 2020-13 | 4 FR-South V | 1 | 4 | #####    | #####    |  |
| 44 | 1 FR | 2020-13 | 4 FR-South V | 1 | 5 | 0        | 0        |  |
| 45 | 1 FR | 2020-13 | 4 FR-South V | 2 | 1 | #####    | #####    |  |
| 46 | 1 FR | 2020-13 | 4 FR-South V | 2 | 2 | #####    | #####    |  |
| 47 | 1 FR | 2020-13 | 4 FR-South V | 2 | 3 | #####    | #####    |  |
| 48 | 1 FR | 2020-13 | 4 FR-South V | 2 | 4 | #####    | #####    |  |
| 49 | 1 FR | 2020-13 | 4 FR-South V | 2 | 5 | 0        | 0        |  |
| 50 | 1 FR | 2020-13 | 4 FR-South V | 3 | 1 | #####    | #####    |  |
| 51 | 1 FR | 2020-13 | 4 FR-South V | 3 | 2 | 0        | 0        |  |
| 52 | 1 FR | 2020-13 | 4 FR-South V | 3 | 3 | 1.9375   | 1.084333 |  |
| 53 | 1 FR | 2020-13 | 4 FR-South V | 3 | 4 | #####    | #####    |  |
| 54 | 1 FR | 2020-13 | 4 FR-South V | 3 | 5 | 0        | 0        |  |
| 55 | 1 FR | 2020-13 | 4 FR-West    | 1 | 1 | #####    | #####    |  |
| 56 | 1 FR | 2020-13 | 4 FR-West    | 1 | 2 | 1.807988 | 1.053509 |  |
| 57 | 1 FR | 2020-13 | 4 FR-West    | 1 | 3 | #####    | #####    |  |
| 58 | 1 FR | 2020-13 | 4 FR-West    | 1 | 4 | #####    | #####    |  |
| 59 | 1 FR | 2020-13 | 4 FR-West    | 1 | 5 | #####    | #####    |  |
| 60 | 1 FR | 2020-13 | 4 FR-West    | 1 | 5 | #####    | #####    |  |

|    |      |         |               |   |   |          |          |
|----|------|---------|---------------|---|---|----------|----------|
| 1  |      |         |               |   |   |          |          |
| 2  |      |         |               |   |   |          |          |
| 3  | 1 FR | 2020-13 | 4 FR-West     | 2 | 1 | #####    | #####    |
| 4  | 1 FR | 2020-13 | 4 FR-West     | 2 | 2 | 1.03125  | #####    |
| 5  | 1 FR | 2020-13 | 4 FR-West     | 2 | 3 | 1.121951 | #####    |
| 6  | 1 FR | 2020-13 | 4 FR-West     | 2 | 4 | #####    | #####    |
| 7  | 1 FR | 2020-13 | 4 FR-West     | 2 | 5 | #####    | #####    |
| 8  | 1 FR | 2020-13 | 4 FR-West     | 3 | 1 | #####    | #####    |
| 9  | 1 FR | 2020-13 | 4 FR-West     | 3 | 2 | 2.5      | 1.904139 |
| 10 | 1 FR | 2020-13 | 4 FR-West     | 3 | 3 | #####    | #####    |
| 11 | 1 FR | 2020-13 | 4 FR-West     | 3 | 4 | #####    | #####    |
| 12 | 1 FR | 2020-13 | 4 FR-West     | 3 | 5 | 0        | 0        |
| 13 | 1 FR | 2020-13 | 5 FR-Corse    | 1 | 1 | #####    | #####    |
| 14 | 1 FR | 2020-13 | 5 FR-Corse    | 1 | 2 | 1        | 0        |
| 15 | 1 FR | 2020-13 | 5 FR-Corse    | 1 | 5 | 0        | 0        |
| 16 | 1 FR | 2020-13 | 5 FR-Corse    | 2 | 1 | #####    | #####    |
| 17 | 1 FR | 2020-13 | 5 FR-Corse    | 2 | 2 | 1        | 0        |
| 18 | 1 FR | 2020-13 | 5 FR-Corse    | 2 | 5 | 0        | 0        |
| 19 | 1 FR | 2020-13 | 5 FR-Ile de F | 1 | 1 | 1.05108  | #####    |
| 20 | 1 FR | 2020-13 | 5 FR-Ile de F | 1 | 2 | #####    | #####    |
| 21 | 1 FR | 2020-13 | 5 FR-Ile de F | 1 | 3 | #####    | #####    |
| 22 | 1 FR | 2020-13 | 5 FR-Ile de F | 1 | 4 | 1.107867 | #####    |
| 23 | 1 FR | 2020-13 | 5 FR-Ile de F | 1 | 5 | 1.534614 | #####    |
| 24 | 1 FR | 2020-13 | 5 FR-Ile de F | 2 | 1 | #####    | #####    |
| 25 | 1 FR | 2020-13 | 5 FR-Ile de F | 2 | 2 | #####    | #####    |
| 26 | 1 FR | 2020-13 | 5 FR-Ile de F | 2 | 3 | #####    | #####    |
| 27 | 1 FR | 2020-13 | 5 FR-Ile de F | 2 | 4 | #####    | #####    |
| 28 | 1 FR | 2020-13 | 5 FR-Ile de F | 2 | 5 | 1.172414 | #####    |
| 29 | 1 FR | 2020-13 | 5 FR-Ile de F | 3 | 1 | 1.28918  | #####    |
| 30 | 1 FR | 2020-13 | 5 FR-Ile de F | 3 | 2 | #####    | #####    |
| 31 | 1 FR | 2020-13 | 5 FR-Ile de F | 3 | 3 | 1.4375   | #####    |
| 32 | 1 FR | 2020-13 | 5 FR-Ile de F | 3 | 4 | 1.272727 | #####    |
| 33 | 1 FR | 2020-13 | 5 FR-Ile de F | 3 | 5 | 1.944444 | 1.075859 |
| 34 | 1 FR | 2020-13 | 5 FR-North E  | 1 | 1 | 1.156184 | #####    |
| 35 | 1 FR | 2020-13 | 5 FR-North E  | 1 | 2 | #####    | #####    |
| 36 | 1 FR | 2020-13 | 5 FR-North E  | 1 | 3 | 1.177687 | #####    |
| 37 | 1 FR | 2020-13 | 5 FR-North E  | 1 | 4 | #####    | #####    |
| 38 | 1 FR | 2020-13 | 5 FR-North E  | 1 | 5 | 1.699664 | #####    |
| 39 | 1 FR | 2020-13 | 5 FR-North E  | 2 | 1 | #####    | #####    |
| 40 | 1 FR | 2020-13 | 5 FR-North E  | 2 | 2 | #####    | #####    |
| 41 | 1 FR | 2020-13 | 5 FR-North E  | 2 | 3 | #####    | #####    |
| 42 | 1 FR | 2020-13 | 5 FR-North E  | 2 | 4 | 0.78     | #####    |
| 43 | 1 FR | 2020-13 | 5 FR-North E  | 2 | 5 | 1.483871 | #####    |
| 44 | 1 FR | 2020-13 | 5 FR-North E  | 3 | 1 | 1.471864 | #####    |
| 45 | 1 FR | 2020-13 | 5 FR-North E  | 3 | 2 | #####    | #####    |
| 46 | 1 FR | 2020-13 | 5 FR-North E  | 3 | 3 | 1.68     | 1.083395 |
| 47 | 1 FR | 2020-13 | 5 FR-North E  | 3 | 4 | 1.290323 | #####    |
| 48 | 1 FR | 2020-13 | 5 FR-North E  | 3 | 5 | 1.956522 | 1.031702 |
| 49 | 1 FR | 2020-13 | 5 FR-Overall  | 1 | 1 | #####    | #####    |
| 50 | 1 FR | 2020-13 | 5 FR-Overall  | 1 | 2 | #####    | #####    |
| 51 | 1 FR | 2020-13 | 5 FR-Overall  | 1 | 3 | #####    | #####    |
| 52 | 1 FR | 2020-13 | 5 FR-Overall  | 1 | 4 | 1.018707 | #####    |
| 53 | 1 FR | 2020-13 | 5 FR-Overall  | 1 | 5 | 1.132518 | #####    |
| 54 | 1 FR | 2020-13 | 5 FR-Overall  | 2 | 1 | #####    | #####    |
| 55 | 1 FR | 2020-13 | 5 FR-Overall  | 2 | 2 | #####    | #####    |
| 56 | 1 FR | 2020-13 | 5 FR-Overall  | 2 | 3 | #####    | #####    |
| 57 | 1 FR | 2020-13 | 5 FR-Overall  | 2 | 4 | #####    | #####    |
| 58 | 1 FR | 2020-13 | 5 FR-Overall  | 2 | 5 | 1.090706 | #####    |
| 59 | 1 FR | 2020-13 | 5 FR-Overall  | 2 |   |          |          |
| 60 | 1 FR | 2020-13 | 5 FR-Overall  | 2 |   |          |          |

|    |      |         |              |   |   |          |          |  |
|----|------|---------|--------------|---|---|----------|----------|--|
| 1  |      |         |              |   |   |          |          |  |
| 2  |      |         |              |   |   |          |          |  |
| 3  | 1 FR | 2020-13 | 5 FR-Overall | 3 | 1 | 1.110701 | #####    |  |
| 4  | 1 FR | 2020-13 | 5 FR-Overall | 3 | 2 | #####    | #####    |  |
| 5  | 1 FR | 2020-13 | 5 FR-Overall | 3 | 3 | 1.301117 | #####    |  |
| 6  | 1 FR | 2020-13 | 5 FR-Overall | 3 | 4 | 1.229469 | #####    |  |
| 7  | 1 FR | 2020-13 | 5 FR-Overall | 3 | 5 | 1.186753 | #####    |  |
| 8  | 1 FR | 2020-13 | 5 FR-South E | 1 | 1 | #####    | #####    |  |
| 9  | 1 FR | 2020-13 | 5 FR-South E | 1 | 2 | #####    | #####    |  |
| 10 | 1 FR | 2020-13 | 5 FR-South E | 1 | 3 | #####    | #####    |  |
| 11 | 1 FR | 2020-13 | 5 FR-South E | 1 | 4 | 1.261313 | #####    |  |
| 12 | 1 FR | 2020-13 | 5 FR-South E | 1 | 5 | #####    | #####    |  |
| 13 | 1 FR | 2020-13 | 5 FR-South E | 2 | 1 | #####    | #####    |  |
| 14 | 1 FR | 2020-13 | 5 FR-South E | 2 | 2 | 1        | #####    |  |
| 15 | 1 FR | 2020-13 | 5 FR-South E | 2 | 3 | 0.6875   | #####    |  |
| 16 | 1 FR | 2020-13 | 5 FR-South E | 2 | 4 | 1.158416 | #####    |  |
| 17 | 1 FR | 2020-13 | 5 FR-South E | 2 | 5 | #####    | #####    |  |
| 18 | 1 FR | 2020-13 | 5 FR-South E | 3 | 1 | #####    | #####    |  |
| 19 | 1 FR | 2020-13 | 5 FR-South E | 3 | 2 | 0.4375   | #####    |  |
| 20 | 1 FR | 2020-13 | 5 FR-South E | 3 | 3 | #####    | #####    |  |
| 21 | 1 FR | 2020-13 | 5 FR-South E | 3 | 4 | 1.4      | #####    |  |
| 22 | 1 FR | 2020-13 | 5 FR-South E | 3 | 5 | 1.142857 | #####    |  |
| 23 | 1 FR | 2020-13 | 5 FR-South V | 1 | 1 | #####    | #####    |  |
| 24 | 1 FR | 2020-13 | 5 FR-South V | 1 | 2 | #####    | #####    |  |
| 25 | 1 FR | 2020-13 | 5 FR-South V | 1 | 3 | 1.134279 | #####    |  |
| 26 | 1 FR | 2020-13 | 5 FR-South V | 1 | 4 | #####    | #####    |  |
| 27 | 1 FR | 2020-13 | 5 FR-South V | 1 | 5 | #####    | #####    |  |
| 28 | 1 FR | 2020-13 | 5 FR-South V | 2 | 1 | #####    | #####    |  |
| 29 | 1 FR | 2020-13 | 5 FR-South V | 2 | 2 | 1.058824 | #####    |  |
| 30 | 1 FR | 2020-13 | 5 FR-South V | 2 | 3 | #####    | #####    |  |
| 31 | 1 FR | 2020-13 | 5 FR-South V | 2 | 4 | #####    | #####    |  |
| 32 | 1 FR | 2020-13 | 5 FR-South V | 2 | 5 | #####    | #####    |  |
| 33 | 1 FR | 2020-13 | 5 FR-South V | 3 | 1 | 1.124346 | #####    |  |
| 34 | 1 FR | 2020-13 | 5 FR-South V | 3 | 2 | #####    | #####    |  |
| 35 | 1 FR | 2020-13 | 5 FR-South V | 3 | 3 | 2        | 1.259469 |  |
| 36 | 1 FR | 2020-13 | 5 FR-South V | 3 | 4 | 1.277778 | #####    |  |
| 37 | 1 FR | 2020-13 | 5 FR-South V | 3 | 5 | 0.8125   | #####    |  |
| 38 | 1 FR | 2020-13 | 5 FR-West    | 1 | 1 | #####    | #####    |  |
| 39 | 1 FR | 2020-13 | 5 FR-West    | 1 | 2 | #####    | #####    |  |
| 40 | 1 FR | 2020-13 | 5 FR-West    | 1 | 3 | #####    | #####    |  |
| 41 | 1 FR | 2020-13 | 5 FR-West    | 1 | 4 | #####    | #####    |  |
| 42 | 1 FR | 2020-13 | 5 FR-West    | 1 | 5 | 1.11952  | #####    |  |
| 43 | 1 FR | 2020-13 | 5 FR-West    | 2 | 1 | #####    | #####    |  |
| 44 | 1 FR | 2020-13 | 5 FR-West    | 2 | 2 | #####    | #####    |  |
| 45 | 1 FR | 2020-13 | 5 FR-West    | 2 | 3 | #####    | #####    |  |
| 46 | 1 FR | 2020-13 | 5 FR-West    | 2 | 4 | #####    | #####    |  |
| 47 | 1 FR | 2020-13 | 5 FR-West    | 2 | 5 | 1.568627 | #####    |  |
| 48 | 1 FR | 2020-13 | 5 FR-West    | 3 | 1 | #####    | #####    |  |
| 49 | 1 FR | 2020-13 | 5 FR-West    | 3 | 2 | 0.25     | #####    |  |
| 50 | 1 FR | 2020-13 | 5 FR-West    | 3 | 3 | #####    | #####    |  |
| 51 | 1 FR | 2020-13 | 5 FR-West    | 3 | 4 | #####    | #####    |  |
| 52 | 1 FR | 2020-13 | 5 FR-West    | 3 | 5 | #####    | #####    |  |
| 53 | 1 FR | 2020-13 | 5 FR-West    | 3 | 5 | #####    | #####    |  |
| 54 | 1 FR | 2020-14 | 1 FR-Corse   | 1 | 1 | 4.965365 | 1.716473 |  |
| 55 | 1 FR | 2020-14 | 1 FR-Corse   | 1 | 3 | 4.322993 | 1.759086 |  |
| 56 | 1 FR | 2020-14 | 1 FR-Corse   | 1 | 4 | 4        | 2.669543 |  |
| 57 | 1 FR | 2020-14 | 1 FR-Corse   | 1 | 5 | 12       | 0        |  |
| 58 | 1 FR | 2020-14 | 1 FR-Corse   | 2 | 1 | 5.745616 | 1.997931 |  |
| 59 | 1 FR | 2020-14 | 1 FR-Corse   | 2 | 3 | 7        | 0        |  |
| 60 | 1 FR | 2020-14 | 1 FR-Corse   | 2 | 3 | 7        | 0        |  |

|    |      |         |               |   |   |          |          |  |
|----|------|---------|---------------|---|---|----------|----------|--|
| 1  |      |         |               |   |   |          |          |  |
| 2  |      |         |               |   |   |          |          |  |
| 3  | 1 FR | 2020-14 | 1 FR-Corse    | 2 | 4 | 4        | 2.669543 |  |
| 4  | 1 FR | 2020-14 | 1 FR-Corse    | 2 | 5 | 12       | 0        |  |
| 5  | 1 FR | 2020-14 | 1 FR-Corse    | 3 | 1 | 2        | 0        |  |
| 6  | 1 FR | 2020-14 | 1 FR-Corse    | 3 | 3 | 2        | 0        |  |
| 7  | 1 FR | 2020-14 | 1 FR-Ile de F | 1 | 1 | 2.863824 | #####    |  |
| 8  | 1 FR | 2020-14 | 1 FR-Ile de F | 1 | 2 | 2.787545 | #####    |  |
| 9  | 1 FR | 2020-14 | 1 FR-Ile de F | 1 | 3 | 2.866633 | #####    |  |
| 10 | 1 FR | 2020-14 | 1 FR-Ile de F | 1 | 4 | 3.345736 | #####    |  |
| 11 | 1 FR | 2020-14 | 1 FR-Ile de F | 1 | 5 | 2.123468 | #####    |  |
| 12 | 1 FR | 2020-14 | 1 FR-Ile de F | 2 | 1 | 3.197259 | #####    |  |
| 13 | 1 FR | 2020-14 | 1 FR-Ile de F | 2 | 2 | 3.5      | #####    |  |
| 14 | 1 FR | 2020-14 | 1 FR-Ile de F | 2 | 3 | 3.818182 | #####    |  |
| 15 | 1 FR | 2020-14 | 1 FR-Ile de F | 2 | 4 | 2.962264 | #####    |  |
| 16 | 1 FR | 2020-14 | 1 FR-Ile de F | 2 | 5 | 1.785714 | #####    |  |
| 17 | 1 FR | 2020-14 | 1 FR-Ile de F | 3 | 1 | 2.526103 | #####    |  |
| 18 | 1 FR | 2020-14 | 1 FR-Ile de F | 3 | 2 | 2.375    | #####    |  |
| 19 | 1 FR | 2020-14 | 1 FR-Ile de F | 3 | 3 | 2        | #####    |  |
| 20 | 1 FR | 2020-14 | 1 FR-Ile de F | 3 | 4 | 3.894737 | 1.529002 |  |
| 21 | 1 FR | 2020-14 | 1 FR-Ile de F | 3 | 5 | 2.727273 | #####    |  |
| 22 | 1 FR | 2020-14 | 1 FR-North E  | 1 | 1 | 3.573575 | #####    |  |
| 23 | 1 FR | 2020-14 | 1 FR-North E  | 1 | 2 | 3.124256 | #####    |  |
| 24 | 1 FR | 2020-14 | 1 FR-North E  | 1 | 3 | 4.761399 | #####    |  |
| 25 | 1 FR | 2020-14 | 1 FR-North E  | 1 | 4 | 3.89442  | #####    |  |
| 26 | 1 FR | 2020-14 | 1 FR-North E  | 1 | 5 | 1.789926 | #####    |  |
| 27 | 1 FR | 2020-14 | 1 FR-North E  | 2 | 1 | 3.310254 | #####    |  |
| 28 | 1 FR | 2020-14 | 1 FR-North E  | 2 | 2 | 3.214286 | #####    |  |
| 29 | 1 FR | 2020-14 | 1 FR-North E  | 2 | 3 | 4.417476 | #####    |  |
| 30 | 1 FR | 2020-14 | 1 FR-North E  | 2 | 4 | 3.298246 | #####    |  |
| 31 | 1 FR | 2020-14 | 1 FR-North E  | 2 | 5 | 1.870968 | #####    |  |
| 32 | 1 FR | 2020-14 | 1 FR-North E  | 3 | 1 | 3.874158 | #####    |  |
| 33 | 1 FR | 2020-14 | 1 FR-North E  | 3 | 2 | 3.04     | #####    |  |
| 34 | 1 FR | 2020-14 | 1 FR-North E  | 3 | 3 | 5.147059 | 1.232709 |  |
| 35 | 1 FR | 2020-14 | 1 FR-North E  | 3 | 4 | 4.538462 | 1.071843 |  |
| 36 | 1 FR | 2020-14 | 1 FR-North E  | 3 | 5 | 1.666667 | #####    |  |
| 37 | 1 FR | 2020-14 | 1 FR-Overall  | 1 | 1 | 3.26108  | #####    |  |
| 38 | 1 FR | 2020-14 | 1 FR-Overall  | 1 | 2 | 2.96851  | #####    |  |
| 39 | 1 FR | 2020-14 | 1 FR-Overall  | 1 | 3 | 4.060666 | #####    |  |
| 40 | 1 FR | 2020-14 | 1 FR-Overall  | 1 | 4 | 3.394199 | #####    |  |
| 41 | 1 FR | 2020-14 | 1 FR-Overall  | 1 | 5 | 1.964216 | #####    |  |
| 42 | 1 FR | 2020-14 | 1 FR-Overall  | 2 | 1 | 3.377554 | #####    |  |
| 43 | 1 FR | 2020-14 | 1 FR-Overall  | 2 | 2 | 3.380052 | #####    |  |
| 44 | 1 FR | 2020-14 | 1 FR-Overall  | 2 | 3 | 4.298962 | #####    |  |
| 45 | 1 FR | 2020-14 | 1 FR-Overall  | 2 | 4 | 3.371342 | #####    |  |
| 46 | 1 FR | 2020-14 | 1 FR-Overall  | 2 | 5 | 1.922943 | #####    |  |
| 47 | 1 FR | 2020-14 | 1 FR-Overall  | 3 | 1 | 3.127269 | #####    |  |
| 48 | 1 FR | 2020-14 | 1 FR-Overall  | 3 | 2 | 2.631226 | #####    |  |
| 49 | 1 FR | 2020-14 | 1 FR-Overall  | 3 | 3 | 3.790809 | #####    |  |
| 50 | 1 FR | 2020-14 | 1 FR-Overall  | 3 | 4 | 3.423405 | #####    |  |
| 51 | 1 FR | 2020-14 | 1 FR-Overall  | 3 | 5 | 2.022339 | #####    |  |
| 52 | 1 FR | 2020-14 | 1 FR-South E  | 1 | 1 | 3.3499   | #####    |  |
| 53 | 1 FR | 2020-14 | 1 FR-South E  | 1 | 2 | 2.887317 | #####    |  |
| 54 | 1 FR | 2020-14 | 1 FR-South E  | 1 | 3 | 4.191528 | #####    |  |
| 55 | 1 FR | 2020-14 | 1 FR-South E  | 1 | 4 | 3.49678  | #####    |  |
| 56 | 1 FR | 2020-14 | 1 FR-South E  | 1 | 5 | 2.369583 | #####    |  |
| 57 | 1 FR | 2020-14 | 1 FR-South E  | 2 | 1 | 3.321252 | #####    |  |
| 58 | 1 FR | 2020-14 | 1 FR-South E  | 2 | 2 | 3.55102  | #####    |  |
| 59 | 1 FR | 2020-14 | 1 FR-South E  | 2 | 2 | 3.55102  | #####    |  |
| 60 | 1 FR | 2020-14 | 1 FR-South E  | 2 | 2 | 3.55102  | #####    |  |

|    |      |         |               |   |   |          |          |  |
|----|------|---------|---------------|---|---|----------|----------|--|
| 1  |      |         |               |   |   |          |          |  |
| 2  |      |         |               |   |   |          |          |  |
| 3  | 1 FR | 2020-14 | 1 FR-South E  | 2 | 3 | 3.890244 | #####    |  |
| 4  | 1 FR | 2020-14 | 1 FR-South E  | 2 | 4 | 3.521127 | #####    |  |
| 5  | 1 FR | 2020-14 | 1 FR-South E  | 2 | 5 | 2.205128 | #####    |  |
| 6  | 1 FR | 2020-14 | 1 FR-South E  | 3 | 1 | 3.388336 | #####    |  |
| 7  | 1 FR | 2020-14 | 1 FR-South E  | 3 | 2 | 2.25     | #####    |  |
| 8  | 1 FR | 2020-14 | 1 FR-South E  | 3 | 3 | 4.571429 | 1.127724 |  |
| 9  | 1 FR | 2020-14 | 1 FR-South E  | 3 | 4 | 3.458333 | 1.105622 |  |
| 10 | 1 FR | 2020-14 | 1 FR-South E  | 3 | 5 | 2.647059 | 1.143599 |  |
| 11 | 1 FR | 2020-14 | 1 FR-South V  | 1 | 1 | 2.769897 | #####    |  |
| 12 | 1 FR | 2020-14 | 1 FR-South V  | 1 | 2 | 2.94654  | #####    |  |
| 13 | 1 FR | 2020-14 | 1 FR-South V  | 1 | 3 | 3.179795 | #####    |  |
| 14 | 1 FR | 2020-14 | 1 FR-South V  | 1 | 4 | 2.875683 | #####    |  |
| 15 | 1 FR | 2020-14 | 1 FR-South V  | 1 | 5 | 1.973918 | #####    |  |
| 16 | 1 FR | 2020-14 | 1 FR-South V  | 2 | 1 | 3.228119 | #####    |  |
| 17 | 1 FR | 2020-14 | 1 FR-South V  | 2 | 2 | 3.952381 | 1.274308 |  |
| 18 | 1 FR | 2020-14 | 1 FR-South V  | 2 | 3 | 4.240741 | #####    |  |
| 19 | 1 FR | 2020-14 | 1 FR-South V  | 2 | 4 | 2.825581 | #####    |  |
| 20 | 1 FR | 2020-14 | 1 FR-South V  | 2 | 5 | 1.736842 | #####    |  |
| 21 | 1 FR | 2020-14 | 1 FR-South V  | 3 | 1 | 2.199017 | #####    |  |
| 22 | 1 FR | 2020-14 | 1 FR-South V  | 3 | 2 | 1.923077 | #####    |  |
| 23 | 1 FR | 2020-14 | 1 FR-South V  | 3 | 3 | 1.555556 | #####    |  |
| 24 | 1 FR | 2020-14 | 1 FR-South V  | 3 | 4 | 2.939394 | #####    |  |
| 25 | 1 FR | 2020-14 | 1 FR-South V  | 3 | 5 | 2.222222 | #####    |  |
| 26 | 1 FR | 2020-14 | 1 FR-South V  | 3 | 5 | 2.222222 | #####    |  |
| 27 | 1 FR | 2020-14 | 1 FR-West     | 1 | 1 | 3.643321 | #####    |  |
| 28 | 1 FR | 2020-14 | 1 FR-West     | 1 | 2 | 3.058088 | #####    |  |
| 29 | 1 FR | 2020-14 | 1 FR-West     | 1 | 3 | 5.485285 | #####    |  |
| 30 | 1 FR | 2020-14 | 1 FR-West     | 1 | 4 | 3.420263 | #####    |  |
| 31 | 1 FR | 2020-14 | 1 FR-West     | 1 | 5 | 1.450245 | #####    |  |
| 32 | 1 FR | 2020-14 | 1 FR-West     | 2 | 1 | 3.699989 | #####    |  |
| 33 | 1 FR | 2020-14 | 1 FR-West     | 2 | 2 | 2.786885 | #####    |  |
| 34 | 1 FR | 2020-14 | 1 FR-West     | 2 | 3 | 5.079545 | #####    |  |
| 35 | 1 FR | 2020-14 | 1 FR-West     | 2 | 4 | 4.208333 | #####    |  |
| 36 | 1 FR | 2020-14 | 1 FR-West     | 2 | 5 | 1.617647 | #####    |  |
| 37 | 1 FR | 2020-14 | 1 FR-West     | 3 | 1 | 3.586157 | #####    |  |
| 38 | 1 FR | 2020-14 | 1 FR-West     | 3 | 2 | 3.25     | #####    |  |
| 39 | 1 FR | 2020-14 | 1 FR-West     | 3 | 3 | 5.909091 | 1.320571 |  |
| 40 | 1 FR | 2020-14 | 1 FR-West     | 3 | 4 | 2.606061 | #####    |  |
| 41 | 1 FR | 2020-14 | 1 FR-West     | 3 | 5 | 1.235294 | #####    |  |
| 42 | 1 FR | 2020-14 | 2 FR-Corse    | 1 | 1 | 3.48605  | 1.313768 |  |
| 43 | 1 FR | 2020-14 | 2 FR-Corse    | 1 | 3 | 2.464599 | #####    |  |
| 44 | 1 FR | 2020-14 | 2 FR-Corse    | 1 | 4 | 3.75     | 2.459292 |  |
| 45 | 1 FR | 2020-14 | 2 FR-Corse    | 1 | 5 | 6        | 0        |  |
| 46 | 1 FR | 2020-14 | 2 FR-Corse    | 2 | 1 | 3.877061 | 1.609751 |  |
| 47 | 1 FR | 2020-14 | 2 FR-Corse    | 2 | 3 | 3        | 0        |  |
| 48 | 1 FR | 2020-14 | 2 FR-Corse    | 2 | 4 | 3.75     | 2.459292 |  |
| 49 | 1 FR | 2020-14 | 2 FR-Corse    | 2 | 5 | 6        | 0        |  |
| 50 | 1 FR | 2020-14 | 2 FR-Corse    | 3 | 1 | 2        | 0        |  |
| 51 | 1 FR | 2020-14 | 2 FR-Corse    | 3 | 3 | 2        | 0        |  |
| 52 | 1 FR | 2020-14 | 2 FR-Ile de F | 1 | 1 | 1.495574 | #####    |  |
| 53 | 1 FR | 2020-14 | 2 FR-Ile de F | 1 | 2 | 1.953398 | #####    |  |
| 54 | 1 FR | 2020-14 | 2 FR-Ile de F | 1 | 3 | 1.529468 | #####    |  |
| 55 | 1 FR | 2020-14 | 2 FR-Ile de F | 1 | 4 | 1.410746 | #####    |  |
| 56 | 1 FR | 2020-14 | 2 FR-Ile de F | 1 | 5 | #####    | #####    |  |
| 57 | 1 FR | 2020-14 | 2 FR-Ile de F | 2 | 1 | 1.640305 | #####    |  |
| 58 | 1 FR | 2020-14 | 2 FR-Ile de F | 2 | 2 | 2.272727 | #####    |  |
| 59 | 1 FR | 2020-14 | 2 FR-Ile de F | 2 | 3 | 1.929825 | #####    |  |
| 60 | 1 FR | 2020-14 | 2 FR-Ile de F | 2 | 3 | 1.929825 | #####    |  |

|    |      |         |               |   |   |          |       |  |
|----|------|---------|---------------|---|---|----------|-------|--|
| 1  |      |         |               |   |   |          |       |  |
| 2  |      |         |               |   |   |          |       |  |
| 3  | 1 FR | 2020-14 | 2 FR-Ile de F | 2 | 4 | 1.462963 | ##### |  |
| 4  | 1 FR | 2020-14 | 2 FR-Ile de F | 2 | 5 | #####    | ##### |  |
| 5  | 1 FR | 2020-14 | 2 FR-Ile de F | 3 | 1 | 1.35467  | ##### |  |
| 6  | 1 FR | 2020-14 | 2 FR-Ile de F | 3 | 2 | 1.75     | ##### |  |
| 7  | 1 FR | 2020-14 | 2 FR-Ile de F | 3 | 3 | 1.178571 | ##### |  |
| 8  | 1 FR | 2020-14 | 2 FR-Ile de F | 3 | 4 | 1.347826 | ##### |  |
| 9  | 1 FR | 2020-14 | 2 FR-Ile de F | 3 | 5 | 1.272727 | ##### |  |
| 10 | 1 FR | 2020-14 | 2 FR-North E  | 1 | 1 | 1.706863 | ##### |  |
| 11 | 1 FR | 2020-14 | 2 FR-North E  | 1 | 2 | 2.178866 | ##### |  |
| 12 | 1 FR | 2020-14 | 2 FR-North E  | 1 | 3 | 1.950933 | ##### |  |
| 13 | 1 FR | 2020-14 | 2 FR-North E  | 1 | 4 | 1.623878 | ##### |  |
| 14 | 1 FR | 2020-14 | 2 FR-North E  | 1 | 5 | #####    | ##### |  |
| 15 | 1 FR | 2020-14 | 2 FR-North E  | 2 | 1 | 1.73087  | ##### |  |
| 16 | 1 FR | 2020-14 | 2 FR-North E  | 2 | 2 | 2.087719 | ##### |  |
| 17 | 1 FR | 2020-14 | 2 FR-North E  | 2 | 3 | 2.229358 | ##### |  |
| 18 | 1 FR | 2020-14 | 2 FR-North E  | 2 | 4 | 1.483333 | ##### |  |
| 19 | 1 FR | 2020-14 | 2 FR-North E  | 2 | 5 | #####    | ##### |  |
| 20 | 1 FR | 2020-14 | 2 FR-North E  | 3 | 1 | 1.679796 | ##### |  |
| 21 | 1 FR | 2020-14 | 2 FR-North E  | 3 | 2 | 2.259259 | ##### |  |
| 22 | 1 FR | 2020-14 | 2 FR-North E  | 3 | 3 | 1.638889 | ##### |  |
| 23 | 1 FR | 2020-14 | 2 FR-North E  | 3 | 4 | 1.777778 | ##### |  |
| 24 | 1 FR | 2020-14 | 2 FR-North E  | 3 | 5 | #####    | ##### |  |
| 25 | 1 FR | 2020-14 | 2 FR-North E  | 3 | 5 | #####    | ##### |  |
| 26 | 1 FR | 2020-14 | 2 FR-Overall  | 1 | 1 | 1.520678 | ##### |  |
| 27 | 1 FR | 2020-14 | 2 FR-Overall  | 1 | 2 | 2.0666   | ##### |  |
| 28 | 1 FR | 2020-14 | 2 FR-Overall  | 1 | 3 | 1.638583 | ##### |  |
| 29 | 1 FR | 2020-14 | 2 FR-Overall  | 1 | 4 | 1.389213 | ##### |  |
| 30 | 1 FR | 2020-14 | 2 FR-Overall  | 1 | 5 | #####    | ##### |  |
| 31 | 1 FR | 2020-14 | 2 FR-Overall  | 2 | 1 | 1.604583 | ##### |  |
| 32 | 1 FR | 2020-14 | 2 FR-Overall  | 2 | 2 | 2.070228 | ##### |  |
| 33 | 1 FR | 2020-14 | 2 FR-Overall  | 2 | 3 | 1.944538 | ##### |  |
| 34 | 1 FR | 2020-14 | 2 FR-Overall  | 2 | 4 | 1.470317 | ##### |  |
| 35 | 1 FR | 2020-14 | 2 FR-Overall  | 2 | 5 | #####    | ##### |  |
| 36 | 1 FR | 2020-14 | 2 FR-Overall  | 3 | 1 | 1.427088 | ##### |  |
| 37 | 1 FR | 2020-14 | 2 FR-Overall  | 3 | 2 | 2.063697 | ##### |  |
| 38 | 1 FR | 2020-14 | 2 FR-Overall  | 3 | 3 | 1.301484 | ##### |  |
| 39 | 1 FR | 2020-14 | 2 FR-Overall  | 3 | 4 | 1.289761 | ##### |  |
| 40 | 1 FR | 2020-14 | 2 FR-Overall  | 3 | 5 | 1.0652   | ##### |  |
| 41 | 1 FR | 2020-14 | 2 FR-South E  | 1 | 1 | 1.489223 | ##### |  |
| 42 | 1 FR | 2020-14 | 2 FR-South E  | 1 | 2 | 1.83822  | ##### |  |
| 43 | 1 FR | 2020-14 | 2 FR-South E  | 1 | 3 | 1.705736 | ##### |  |
| 44 | 1 FR | 2020-14 | 2 FR-South E  | 1 | 4 | 1.307021 | ##### |  |
| 45 | 1 FR | 2020-14 | 2 FR-South E  | 1 | 5 | 1.044088 | ##### |  |
| 46 | 1 FR | 2020-14 | 2 FR-South E  | 2 | 1 | 1.510458 | ##### |  |
| 47 | 1 FR | 2020-14 | 2 FR-South E  | 2 | 2 | 1.92     | ##### |  |
| 48 | 1 FR | 2020-14 | 2 FR-South E  | 2 | 3 | 1.847059 | ##### |  |
| 49 | 1 FR | 2020-14 | 2 FR-South E  | 2 | 4 | 1.383562 | ##### |  |
| 50 | 1 FR | 2020-14 | 2 FR-South E  | 2 | 5 | #####    | ##### |  |
| 51 | 1 FR | 2020-14 | 2 FR-South E  | 3 | 1 | 1.461904 | ##### |  |
| 52 | 1 FR | 2020-14 | 2 FR-South E  | 3 | 2 | 1.761905 | ##### |  |
| 53 | 1 FR | 2020-14 | 2 FR-South E  | 3 | 3 | 1.533333 | ##### |  |
| 54 | 1 FR | 2020-14 | 2 FR-South E  | 3 | 4 | 1.192308 | ##### |  |
| 55 | 1 FR | 2020-14 | 2 FR-South E  | 3 | 5 | 1.277778 | ##### |  |
| 56 | 1 FR | 2020-14 | 2 FR-South E  | 3 | 5 | 1.277778 | ##### |  |
| 57 | 1 FR | 2020-14 | 2 FR-South V  | 1 | 1 | 1.323216 | ##### |  |
| 58 | 1 FR | 2020-14 | 2 FR-South V  | 1 | 2 | 2.054548 | ##### |  |
| 59 | 1 FR | 2020-14 | 2 FR-South V  | 1 | 3 | 1.437783 | ##### |  |
| 60 | 1 FR | 2020-14 | 2 FR-South V  | 1 | 4 | 1.138899 | ##### |  |



|    |      |         |               |   |   |          |       |  |
|----|------|---------|---------------|---|---|----------|-------|--|
| 1  |      |         |               |   |   |          |       |  |
| 2  |      |         |               |   |   |          |       |  |
| 3  | 1 FR | 2020-14 | 2 FR-South V  | 1 | 5 | #####    | ##### |  |
| 4  | 1 FR | 2020-14 | 2 FR-South V  | 2 | 1 | 1.51793  | ##### |  |
| 5  | 1 FR | 2020-14 | 2 FR-South V  | 2 | 2 | 2.181818 | ##### |  |
| 6  | 1 FR | 2020-14 | 2 FR-South V  | 2 | 3 | 1.913793 | ##### |  |
| 7  | 1 FR | 2020-14 | 2 FR-South V  | 2 | 4 | 1.295455 | ##### |  |
| 8  | 1 FR | 2020-14 | 2 FR-South V  | 2 | 5 | #####    | ##### |  |
| 9  | 1 FR | 2020-14 | 2 FR-South V  | 3 | 1 | 1.0838   | ##### |  |
| 10 | 1 FR | 2020-14 | 2 FR-South V  | 3 | 2 | 1.928571 | ##### |  |
| 11 | 1 FR | 2020-14 | 2 FR-South V  | 3 | 3 | #####    | ##### |  |
| 12 | 1 FR | 2020-14 | 2 FR-South V  | 3 | 4 | #####    | ##### |  |
| 13 | 1 FR | 2020-14 | 2 FR-South V  | 3 | 5 | 1.111111 | ##### |  |
| 14 | 1 FR | 2020-14 | 2 FR-West     | 1 | 1 | 1.506716 | ##### |  |
| 15 | 1 FR | 2020-14 | 2 FR-West     | 1 | 2 | 2.256308 | ##### |  |
| 16 | 1 FR | 2020-14 | 2 FR-West     | 1 | 3 | 1.549923 | ##### |  |
| 17 | 1 FR | 2020-14 | 2 FR-West     | 1 | 4 | 1.343415 | ##### |  |
| 18 | 1 FR | 2020-14 | 2 FR-West     | 1 | 5 | #####    | ##### |  |
| 19 | 1 FR | 2020-14 | 2 FR-West     | 2 | 1 | 1.500816 | ##### |  |
| 20 | 1 FR | 2020-14 | 2 FR-West     | 2 | 2 | 1.939394 | ##### |  |
| 21 | 1 FR | 2020-14 | 2 FR-West     | 2 | 3 | 1.747368 | ##### |  |
| 22 | 1 FR | 2020-14 | 2 FR-West     | 2 | 4 | 1.461538 | ##### |  |
| 23 | 1 FR | 2020-14 | 2 FR-West     | 2 | 5 | #####    | ##### |  |
| 24 | 1 FR | 2020-14 | 2 FR-West     | 3 | 1 | 1.512461 | ##### |  |
| 25 | 1 FR | 2020-14 | 2 FR-West     | 3 | 2 | 2.464286 | ##### |  |
| 26 | 1 FR | 2020-14 | 2 FR-West     | 3 | 3 | 1.351351 | ##### |  |
| 27 | 1 FR | 2020-14 | 2 FR-West     | 3 | 4 | 1.222222 | ##### |  |
| 28 | 1 FR | 2020-14 | 2 FR-West     | 3 | 5 | #####    | ##### |  |
| 29 | 1 FR | 2020-14 | 3 FR-Corse    | 1 | 1 | #####    | ##### |  |
| 30 | 1 FR | 2020-14 | 3 FR-Corse    | 1 | 3 | 0        | 0     |  |
| 31 | 1 FR | 2020-14 | 3 FR-Corse    | 1 | 4 | 0.25     | ##### |  |
| 32 | 1 FR | 2020-14 | 3 FR-Corse    | 1 | 5 | 6        | 0     |  |
| 33 | 1 FR | 2020-14 | 3 FR-Corse    | 2 | 1 | #####    | ##### |  |
| 34 | 1 FR | 2020-14 | 3 FR-Corse    | 2 | 3 | 0        | 0     |  |
| 35 | 1 FR | 2020-14 | 3 FR-Corse    | 2 | 4 | 0.25     | ##### |  |
| 36 | 1 FR | 2020-14 | 3 FR-Corse    | 2 | 5 | 6        | 0     |  |
| 37 | 1 FR | 2020-14 | 3 FR-Corse    | 3 | 1 | 0        | 0     |  |
| 38 | 1 FR | 2020-14 | 3 FR-Corse    | 3 | 3 | 0        | 0     |  |
| 39 | 1 FR | 2020-14 | 3 FR-Corse    | 3 | 3 | 0        | 0     |  |
| 40 | 1 FR | 2020-14 | 3 FR-Ile de F | 1 | 1 | #####    | ##### |  |
| 41 | 1 FR | 2020-14 | 3 FR-Ile de F | 1 | 2 | #####    | ##### |  |
| 42 | 1 FR | 2020-14 | 3 FR-Ile de F | 1 | 3 | 0        | 0     |  |
| 43 | 1 FR | 2020-14 | 3 FR-Ile de F | 1 | 4 | 0        | 0     |  |
| 44 | 1 FR | 2020-14 | 3 FR-Ile de F | 1 | 5 | 0        | 0     |  |
| 45 | 1 FR | 2020-14 | 3 FR-Ile de F | 2 | 1 | 0        | 0     |  |
| 46 | 1 FR | 2020-14 | 3 FR-Ile de F | 2 | 2 | 0        | 0     |  |
| 47 | 1 FR | 2020-14 | 3 FR-Ile de F | 2 | 3 | 0        | 0     |  |
| 48 | 1 FR | 2020-14 | 3 FR-Ile de F | 2 | 4 | 0        | 0     |  |
| 49 | 1 FR | 2020-14 | 3 FR-Ile de F | 2 | 5 | 0        | 0     |  |
| 50 | 1 FR | 2020-14 | 3 FR-Ile de F | 3 | 1 | #####    | ##### |  |
| 51 | 1 FR | 2020-14 | 3 FR-Ile de F | 3 | 2 | 0.125    | ##### |  |
| 52 | 1 FR | 2020-14 | 3 FR-Ile de F | 3 | 3 | 0        | 0     |  |
| 53 | 1 FR | 2020-14 | 3 FR-Ile de F | 3 | 4 | 0        | 0     |  |
| 54 | 1 FR | 2020-14 | 3 FR-Ile de F | 3 | 5 | 0        | 0     |  |
| 55 | 1 FR | 2020-14 | 3 FR-North E  | 1 | 1 | #####    | ##### |  |
| 56 | 1 FR | 2020-14 | 3 FR-North E  | 1 | 2 | #####    | ##### |  |
| 57 | 1 FR | 2020-14 | 3 FR-North E  | 1 | 3 | #####    | ##### |  |
| 58 | 1 FR | 2020-14 | 3 FR-North E  | 1 | 4 | 0        | 0     |  |
| 59 | 1 FR | 2020-14 | 3 FR-North E  | 1 | 5 | #####    | ##### |  |
| 60 | 1 FR | 2020-14 | 3 FR-North E  | 1 | 5 | #####    | ##### |  |

1  
2  
3  
4  
5  
6  
7  
8  
9  
10  
11  
12  
13  
14  
15  
16  
17  
18  
19  
20  
21  
22  
23  
24  
25  
26  
27  
28  
29  
30  
31  
32  
33  
34  
35  
36  
37  
38  
39  
40  
41  
42  
43  
44  
45  
46  
47  
48  
49  
50  
51  
52  
53  
54  
55  
56  
57  
58  
59  
60

|      |         |              |   |   |        |       |
|------|---------|--------------|---|---|--------|-------|
| 1 FR | 2020-14 | 3 FR-North E | 2 | 1 | #####  | ##### |
| 1 FR | 2020-14 | 3 FR-North E | 2 | 2 | #####  | ##### |
| 1 FR | 2020-14 | 3 FR-North E | 2 | 3 | #####  | ##### |
| 1 FR | 2020-14 | 3 FR-North E | 2 | 4 | 0      | 0     |
| 1 FR | 2020-14 | 3 FR-North E | 2 | 5 | 0.0625 | ##### |
| 1 FR | 2020-14 | 3 FR-North E | 3 | 1 | #####  | ##### |
| 1 FR | 2020-14 | 3 FR-North E | 3 | 2 | #####  | ##### |
| 1 FR | 2020-14 | 3 FR-North E | 3 | 3 | 0      | 0     |
| 1 FR | 2020-14 | 3 FR-North E | 3 | 4 | 0      | 0     |
| 1 FR | 2020-14 | 3 FR-North E | 3 | 5 | 0      | 0     |
| 1 FR | 2020-14 | 3 FR-Overall | 1 | 1 | #####  | ##### |
| 1 FR | 2020-14 | 3 FR-Overall | 1 | 2 | #####  | ##### |
| 1 FR | 2020-14 | 3 FR-Overall | 1 | 3 | #####  | ##### |
| 1 FR | 2020-14 | 3 FR-Overall | 1 | 4 | #####  | ##### |
| 1 FR | 2020-14 | 3 FR-Overall | 1 | 5 | #####  | ##### |
| 1 FR | 2020-14 | 3 FR-Overall | 2 | 1 | #####  | ##### |
| 1 FR | 2020-14 | 3 FR-Overall | 2 | 2 | #####  | ##### |
| 1 FR | 2020-14 | 3 FR-Overall | 2 | 3 | #####  | ##### |
| 1 FR | 2020-14 | 3 FR-Overall | 2 | 4 | #####  | ##### |
| 1 FR | 2020-14 | 3 FR-Overall | 2 | 5 | #####  | ##### |
| 1 FR | 2020-14 | 3 FR-Overall | 3 | 1 | #####  | ##### |
| 1 FR | 2020-14 | 3 FR-Overall | 3 | 2 | #####  | ##### |
| 1 FR | 2020-14 | 3 FR-Overall | 3 | 3 | #####  | ##### |
| 1 FR | 2020-14 | 3 FR-Overall | 3 | 4 | #####  | ##### |
| 1 FR | 2020-14 | 3 FR-Overall | 3 | 5 | 0      | 0     |
| 1 FR | 2020-14 | 3 FR-South E | 1 | 1 | #####  | ##### |
| 1 FR | 2020-14 | 3 FR-South E | 1 | 2 | 0      | 0     |
| 1 FR | 2020-14 | 3 FR-South E | 1 | 3 | #####  | ##### |
| 1 FR | 2020-14 | 3 FR-South E | 1 | 4 | #####  | ##### |
| 1 FR | 2020-14 | 3 FR-South E | 1 | 5 | 0      | 0     |
| 1 FR | 2020-14 | 3 FR-South E | 2 | 1 | #####  | ##### |
| 1 FR | 2020-14 | 3 FR-South E | 2 | 2 | 0      | 0     |
| 1 FR | 2020-14 | 3 FR-South E | 2 | 3 | 0      | 0     |
| 1 FR | 2020-14 | 3 FR-South E | 2 | 4 | #####  | ##### |
| 1 FR | 2020-14 | 3 FR-South E | 2 | 5 | 0      | 0     |
| 1 FR | 2020-14 | 3 FR-South E | 3 | 1 | #####  | ##### |
| 1 FR | 2020-14 | 3 FR-South E | 3 | 2 | 0      | 0     |
| 1 FR | 2020-14 | 3 FR-South E | 3 | 3 | #####  | ##### |
| 1 FR | 2020-14 | 3 FR-South E | 3 | 4 | #####  | ##### |
| 1 FR | 2020-14 | 3 FR-South E | 3 | 5 | 0      | 0     |
| 1 FR | 2020-14 | 3 FR-South V | 1 | 1 | #####  | ##### |
| 1 FR | 2020-14 | 3 FR-South V | 1 | 2 | #####  | ##### |
| 1 FR | 2020-14 | 3 FR-South V | 1 | 3 | #####  | ##### |
| 1 FR | 2020-14 | 3 FR-South V | 1 | 4 | #####  | ##### |
| 1 FR | 2020-14 | 3 FR-South V | 1 | 5 | 0      | 0     |
| 1 FR | 2020-14 | 3 FR-South V | 2 | 1 | #####  | ##### |
| 1 FR | 2020-14 | 3 FR-South V | 2 | 2 | #####  | ##### |
| 1 FR | 2020-14 | 3 FR-South V | 2 | 3 | #####  | ##### |
| 1 FR | 2020-14 | 3 FR-South V | 2 | 4 | #####  | ##### |
| 1 FR | 2020-14 | 3 FR-South V | 2 | 5 | 0      | 0     |
| 1 FR | 2020-14 | 3 FR-South V | 3 | 1 | 0      | 0     |
| 1 FR | 2020-14 | 3 FR-South V | 3 | 2 | 0      | 0     |
| 1 FR | 2020-14 | 3 FR-South V | 3 | 3 | 0      | 0     |
| 1 FR | 2020-14 | 3 FR-South V | 3 | 4 | 0      | 0     |
| 1 FR | 2020-14 | 3 FR-South V | 3 | 5 | 0      | 0     |
| 1 FR | 2020-14 | 3 FR-West    | 1 | 1 | #####  | ##### |

|    |      |         |               |   |   |          |          |  |
|----|------|---------|---------------|---|---|----------|----------|--|
| 1  |      |         |               |   |   |          |          |  |
| 2  |      |         |               |   |   |          |          |  |
| 3  | 1 FR | 2020-14 | 3 FR-West     | 1 | 2 | 0        | 0        |  |
| 4  | 1 FR | 2020-14 | 3 FR-West     | 1 | 3 | #####    | #####    |  |
| 5  | 1 FR | 2020-14 | 3 FR-West     | 1 | 4 | #####    | #####    |  |
| 6  | 1 FR | 2020-14 | 3 FR-West     | 1 | 5 | 0        | 0        |  |
| 7  | 1 FR | 2020-14 | 3 FR-West     | 2 | 1 | #####    | #####    |  |
| 8  | 1 FR | 2020-14 | 3 FR-West     | 2 | 2 | 0        | 0        |  |
| 9  | 1 FR | 2020-14 | 3 FR-West     | 2 | 3 | 0        | 0        |  |
| 10 | 1 FR | 2020-14 | 3 FR-West     | 2 | 4 | #####    | #####    |  |
| 11 | 1 FR | 2020-14 | 3 FR-West     | 2 | 5 | 0        | 0        |  |
| 12 | 1 FR | 2020-14 | 3 FR-West     | 3 | 1 | #####    | #####    |  |
| 13 | 1 FR | 2020-14 | 3 FR-West     | 3 | 2 | 0        | 0        |  |
| 14 | 1 FR | 2020-14 | 3 FR-West     | 3 | 3 | #####    | #####    |  |
| 15 | 1 FR | 2020-14 | 3 FR-West     | 3 | 4 | #####    | #####    |  |
| 16 | 1 FR | 2020-14 | 3 FR-West     | 3 | 5 | 0        | 0        |  |
| 17 | 1 FR | 2020-14 | 4 FR-Corse    | 1 | 1 | #####    | #####    |  |
| 18 | 1 FR | 2020-14 | 4 FR-Corse    | 1 | 3 | 1.858395 | 1.407268 |  |
| 19 | 1 FR | 2020-14 | 4 FR-Corse    | 1 | 4 | 0        | 0        |  |
| 20 | 1 FR | 2020-14 | 4 FR-Corse    | 1 | 5 | 0        | 0        |  |
| 21 | 1 FR | 2020-14 | 4 FR-Corse    | 2 | 1 | #####    | #####    |  |
| 22 | 1 FR | 2020-14 | 4 FR-Corse    | 2 | 3 | 4        | 0        |  |
| 23 | 1 FR | 2020-14 | 4 FR-Corse    | 2 | 4 | 0        | 0        |  |
| 24 | 1 FR | 2020-14 | 4 FR-Corse    | 2 | 5 | 0        | 0        |  |
| 25 | 1 FR | 2020-14 | 4 FR-Corse    | 3 | 1 | 0        | 0        |  |
| 26 | 1 FR | 2020-14 | 4 FR-Corse    | 3 | 3 | 0        | 0        |  |
| 27 | 1 FR | 2020-14 | 4 FR-Ile de F | 1 | 1 | #####    | #####    |  |
| 28 | 1 FR | 2020-14 | 4 FR-Ile de F | 1 | 2 | #####    | #####    |  |
| 29 | 1 FR | 2020-14 | 4 FR-Ile de F | 1 | 3 | #####    | #####    |  |
| 30 | 1 FR | 2020-14 | 4 FR-Ile de F | 1 | 4 | #####    | #####    |  |
| 31 | 1 FR | 2020-14 | 4 FR-Ile de F | 1 | 5 | #####    | #####    |  |
| 32 | 1 FR | 2020-14 | 4 FR-Ile de F | 2 | 1 | #####    | #####    |  |
| 33 | 1 FR | 2020-14 | 4 FR-Ile de F | 2 | 2 | #####    | #####    |  |
| 34 | 1 FR | 2020-14 | 4 FR-Ile de F | 2 | 3 | 1.054545 | #####    |  |
| 35 | 1 FR | 2020-14 | 4 FR-Ile de F | 2 | 4 | #####    | #####    |  |
| 36 | 1 FR | 2020-14 | 4 FR-Ile de F | 2 | 5 | 0        | 0        |  |
| 37 | 1 FR | 2020-14 | 4 FR-Ile de F | 3 | 1 | #####    | #####    |  |
| 38 | 1 FR | 2020-14 | 4 FR-Ile de F | 3 | 2 | 0        | 0        |  |
| 39 | 1 FR | 2020-14 | 4 FR-Ile de F | 3 | 3 | #####    | #####    |  |
| 40 | 1 FR | 2020-14 | 4 FR-Ile de F | 3 | 4 | #####    | #####    |  |
| 41 | 1 FR | 2020-14 | 4 FR-Ile de F | 3 | 5 | #####    | #####    |  |
| 42 | 1 FR | 2020-14 | 4 FR-North E  | 1 | 1 | 1.205648 | #####    |  |
| 43 | 1 FR | 2020-14 | 4 FR-North E  | 1 | 2 | #####    | #####    |  |
| 44 | 1 FR | 2020-14 | 4 FR-North E  | 1 | 3 | 1.995159 | #####    |  |
| 45 | 1 FR | 2020-14 | 4 FR-North E  | 1 | 4 | 1.742371 | #####    |  |
| 46 | 1 FR | 2020-14 | 4 FR-North E  | 1 | 5 | #####    | #####    |  |
| 47 | 1 FR | 2020-14 | 4 FR-North E  | 2 | 1 | #####    | #####    |  |
| 48 | 1 FR | 2020-14 | 4 FR-North E  | 2 | 2 | 0.5      | #####    |  |
| 49 | 1 FR | 2020-14 | 4 FR-North E  | 2 | 3 | 1.219048 | #####    |  |
| 50 | 1 FR | 2020-14 | 4 FR-North E  | 2 | 4 | 1.568966 | #####    |  |
| 51 | 1 FR | 2020-14 | 4 FR-North E  | 2 | 5 | 0.375    | #####    |  |
| 52 | 1 FR | 2020-14 | 4 FR-North E  | 3 | 1 | 1.486775 | #####    |  |
| 53 | 1 FR | 2020-14 | 4 FR-North E  | 3 | 2 | #####    | #####    |  |
| 54 | 1 FR | 2020-14 | 4 FR-North E  | 3 | 3 | 2.882353 | 1.101201 |  |
| 55 | 1 FR | 2020-14 | 4 FR-North E  | 3 | 4 | 1.925926 | #####    |  |
| 56 | 1 FR | 2020-14 | 4 FR-North E  | 3 | 5 | 0        | 0        |  |
| 57 | 1 FR | 2020-14 | 4 FR-Overall  | 1 | 1 | #####    | #####    |  |
| 58 | 1 FR | 2020-14 | 4 FR-Overall  | 1 | 2 | #####    | #####    |  |

|    |      |         |              |   |   |          |          |  |  |
|----|------|---------|--------------|---|---|----------|----------|--|--|
| 1  |      |         |              |   |   |          |          |  |  |
| 2  |      |         |              |   |   |          |          |  |  |
| 3  | 1 FR | 2020-14 | 4 FR-Overall | 1 | 3 | 1.420166 | #####    |  |  |
| 4  | 1 FR | 2020-14 | 4 FR-Overall | 1 | 4 | 1.026743 | #####    |  |  |
| 5  | 1 FR | 2020-14 | 4 FR-Overall | 1 | 5 | #####    | #####    |  |  |
| 6  | 1 FR | 2020-14 | 4 FR-Overall | 2 | 1 | #####    | #####    |  |  |
| 7  | 1 FR | 2020-14 | 4 FR-Overall | 2 | 2 | #####    | #####    |  |  |
| 8  | 1 FR | 2020-14 | 4 FR-Overall | 2 | 3 | 1.467357 | #####    |  |  |
| 9  | 1 FR | 2020-14 | 4 FR-Overall | 2 | 4 | #####    | #####    |  |  |
| 10 | 1 FR | 2020-14 | 4 FR-Overall | 2 | 5 | #####    | #####    |  |  |
| 11 | 1 FR | 2020-14 | 4 FR-Overall | 3 | 1 | #####    | #####    |  |  |
| 12 | 1 FR | 2020-14 | 4 FR-Overall | 3 | 2 | #####    | #####    |  |  |
| 13 | 1 FR | 2020-14 | 4 FR-Overall | 3 | 3 | 1.366299 | 0.332743 |  |  |
| 14 | 1 FR | 2020-14 | 4 FR-Overall | 3 | 4 | 1.129975 | #####    |  |  |
| 15 | 1 FR | 2020-14 | 4 FR-Overall | 3 | 5 | #####    | #####    |  |  |
| 16 | 1 FR | 2020-14 | 4 FR-South E | 1 | 1 | #####    | #####    |  |  |
| 17 | 1 FR | 2020-14 | 4 FR-South E | 1 | 2 | #####    | #####    |  |  |
| 18 | 1 FR | 2020-14 | 4 FR-South E | 1 | 3 | 1.345984 | #####    |  |  |
| 19 | 1 FR | 2020-14 | 4 FR-South E | 1 | 4 | #####    | #####    |  |  |
| 20 | 1 FR | 2020-14 | 4 FR-South E | 1 | 5 | #####    | #####    |  |  |
| 21 | 1 FR | 2020-14 | 4 FR-South E | 2 | 1 | #####    | #####    |  |  |
| 22 | 1 FR | 2020-14 | 4 FR-South E | 2 | 2 | 1.102041 | #####    |  |  |
| 23 | 1 FR | 2020-14 | 4 FR-South E | 2 | 3 | 1.280488 | #####    |  |  |
| 24 | 1 FR | 2020-14 | 4 FR-South E | 2 | 4 | 0.625    | #####    |  |  |
| 25 | 1 FR | 2020-14 | 4 FR-South E | 2 | 5 | 0.75     | #####    |  |  |
| 26 | 1 FR | 2020-14 | 4 FR-South E | 3 | 1 | #####    | #####    |  |  |
| 27 | 1 FR | 2020-14 | 4 FR-South E | 3 | 2 | 0.25     | #####    |  |  |
| 28 | 1 FR | 2020-14 | 4 FR-South E | 3 | 3 | 1.428571 | #####    |  |  |
| 29 | 1 FR | 2020-14 | 4 FR-South E | 3 | 4 | 1.541667 | 1.054166 |  |  |
| 30 | 1 FR | 2020-14 | 4 FR-South E | 3 | 5 | 0        | 0        |  |  |
| 31 | 1 FR | 2020-14 | 4 FR-South V | 1 | 1 | #####    | #####    |  |  |
| 32 | 1 FR | 2020-14 | 4 FR-South V | 1 | 2 | #####    | #####    |  |  |
| 33 | 1 FR | 2020-14 | 4 FR-South V | 1 | 3 | 1.096128 | #####    |  |  |
| 34 | 1 FR | 2020-14 | 4 FR-South V | 1 | 4 | #####    | #####    |  |  |
| 35 | 1 FR | 2020-14 | 4 FR-South V | 1 | 5 | 0        | 0        |  |  |
| 36 | 1 FR | 2020-14 | 4 FR-South V | 2 | 1 | #####    | #####    |  |  |
| 37 | 1 FR | 2020-14 | 4 FR-South V | 2 | 2 | #####    | #####    |  |  |
| 38 | 1 FR | 2020-14 | 4 FR-South V | 2 | 3 | 1.422018 | #####    |  |  |
| 39 | 1 FR | 2020-14 | 4 FR-South V | 2 | 4 | 1        | #####    |  |  |
| 40 | 1 FR | 2020-14 | 4 FR-South V | 2 | 5 | 0        | 0        |  |  |
| 41 | 1 FR | 2020-14 | 4 FR-South V | 3 | 1 | #####    | #####    |  |  |
| 42 | 1 FR | 2020-14 | 4 FR-South V | 3 | 2 | 0        | 0        |  |  |
| 43 | 1 FR | 2020-14 | 4 FR-South V | 3 | 3 | #####    | #####    |  |  |
| 44 | 1 FR | 2020-14 | 4 FR-South V | 3 | 4 | #####    | #####    |  |  |
| 45 | 1 FR | 2020-14 | 4 FR-South V | 3 | 5 | 0        | 0        |  |  |
| 46 | 1 FR | 2020-14 | 4 FR-South V | 3 | 5 | 0        | 0        |  |  |
| 47 | 1 FR | 2020-14 | 4 FR-West    | 1 | 1 | #####    | #####    |  |  |
| 48 | 1 FR | 2020-14 | 4 FR-West    | 1 | 2 | #####    | #####    |  |  |
| 49 | 1 FR | 2020-14 | 4 FR-West    | 1 | 3 | 2.040537 | #####    |  |  |
| 50 | 1 FR | 2020-14 | 4 FR-West    | 1 | 4 | #####    | #####    |  |  |
| 51 | 1 FR | 2020-14 | 4 FR-West    | 1 | 5 | #####    | #####    |  |  |
| 52 | 1 FR | 2020-14 | 4 FR-West    | 2 | 1 | 1.12883  | #####    |  |  |
| 53 | 1 FR | 2020-14 | 4 FR-West    | 2 | 2 | #####    | #####    |  |  |
| 54 | 1 FR | 2020-14 | 4 FR-West    | 2 | 3 | 2.337079 | #####    |  |  |
| 55 | 1 FR | 2020-14 | 4 FR-West    | 2 | 4 | 1.027397 | #####    |  |  |
| 56 | 1 FR | 2020-14 | 4 FR-West    | 2 | 5 | #####    | #####    |  |  |
| 57 | 1 FR | 2020-14 | 4 FR-West    | 3 | 1 | #####    | #####    |  |  |
| 58 | 1 FR | 2020-14 | 4 FR-West    | 3 | 2 | #####    | #####    |  |  |
| 59 | 1 FR | 2020-14 | 4 FR-West    | 3 | 3 | 1.727273 | #####    |  |  |
| 60 | 1 FR | 2020-14 | 4 FR-West    | 3 | 3 | 1.727273 | #####    |  |  |

|    |      |         |               |   |   |          |       |
|----|------|---------|---------------|---|---|----------|-------|
| 1  |      |         |               |   |   |          |       |
| 2  |      |         |               |   |   |          |       |
| 3  | 1 FR | 2020-14 | 4 FR-West     | 3 | 4 | #####    | ##### |
| 4  | 1 FR | 2020-14 | 4 FR-West     | 3 | 5 | 0        | 0     |
| 5  | 1 FR | 2020-14 | 5 FR-Corse    | 1 | 1 | 0        | 0     |
| 6  | 1 FR | 2020-14 | 5 FR-Corse    | 1 | 3 | 0        | 0     |
| 7  | 1 FR | 2020-14 | 5 FR-Corse    | 1 | 4 | 0        | 0     |
| 8  | 1 FR | 2020-14 | 5 FR-Corse    | 1 | 5 | 0        | 0     |
| 9  | 1 FR | 2020-14 | 5 FR-Corse    | 2 | 1 | 0        | 0     |
| 10 | 1 FR | 2020-14 | 5 FR-Corse    | 2 | 3 | 0        | 0     |
| 11 | 1 FR | 2020-14 | 5 FR-Corse    | 2 | 4 | 0        | 0     |
| 12 | 1 FR | 2020-14 | 5 FR-Corse    | 2 | 5 | 0        | 0     |
| 13 | 1 FR | 2020-14 | 5 FR-Corse    | 3 | 1 | 0        | 0     |
| 14 | 1 FR | 2020-14 | 5 FR-Corse    | 3 | 3 | 0        | 0     |
| 15 | 1 FR | 2020-14 | 5 FR-Ile de F | 1 | 1 | #####    | ##### |
| 16 | 1 FR | 2020-14 | 5 FR-Ile de F | 1 | 2 | #####    | ##### |
| 17 | 1 FR | 2020-14 | 5 FR-Ile de F | 1 | 3 | #####    | ##### |
| 18 | 1 FR | 2020-14 | 5 FR-Ile de F | 1 | 4 | 1.475713 | ##### |
| 19 | 1 FR | 2020-14 | 5 FR-Ile de F | 1 | 5 | 1.244958 | ##### |
| 20 | 1 FR | 2020-14 | 5 FR-Ile de F | 2 | 1 | #####    | ##### |
| 21 | 1 FR | 2020-14 | 5 FR-Ile de F | 2 | 2 | #####    | ##### |
| 22 | 1 FR | 2020-14 | 5 FR-Ile de F | 2 | 3 | #####    | ##### |
| 23 | 1 FR | 2020-14 | 5 FR-Ile de F | 2 | 4 | 1.277778 | ##### |
| 24 | 1 FR | 2020-14 | 5 FR-Ile de F | 2 | 5 | 1.178571 | ##### |
| 25 | 1 FR | 2020-14 | 5 FR-Ile de F | 3 | 1 | #####    | ##### |
| 26 | 1 FR | 2020-14 | 5 FR-Ile de F | 3 | 2 | 0.5      | ##### |
| 27 | 1 FR | 2020-14 | 5 FR-Ile de F | 3 | 3 | #####    | ##### |
| 28 | 1 FR | 2020-14 | 5 FR-Ile de F | 3 | 4 | 1.75     | ##### |
| 29 | 1 FR | 2020-14 | 5 FR-Ile de F | 3 | 5 | 1.363636 | ##### |
| 30 | 1 FR | 2020-14 | 5 FR-North E  | 1 | 1 | #####    | ##### |
| 31 | 1 FR | 2020-14 | 5 FR-North E  | 1 | 2 | #####    | ##### |
| 32 | 1 FR | 2020-14 | 5 FR-North E  | 1 | 3 | #####    | ##### |
| 33 | 1 FR | 2020-14 | 5 FR-North E  | 1 | 4 | #####    | ##### |
| 34 | 1 FR | 2020-14 | 5 FR-North E  | 1 | 5 | #####    | ##### |
| 35 | 1 FR | 2020-14 | 5 FR-North E  | 2 | 1 | #####    | ##### |
| 36 | 1 FR | 2020-14 | 5 FR-North E  | 2 | 2 | #####    | ##### |
| 37 | 1 FR | 2020-14 | 5 FR-North E  | 2 | 3 | #####    | ##### |
| 38 | 1 FR | 2020-14 | 5 FR-North E  | 2 | 4 | #####    | ##### |
| 39 | 1 FR | 2020-14 | 5 FR-North E  | 2 | 5 | 0.8125   | ##### |
| 40 | 1 FR | 2020-14 | 5 FR-North E  | 3 | 1 | #####    | ##### |
| 41 | 1 FR | 2020-14 | 5 FR-North E  | 3 | 2 | 0.88     | ##### |
| 42 | 1 FR | 2020-14 | 5 FR-North E  | 3 | 3 | #####    | ##### |
| 43 | 1 FR | 2020-14 | 5 FR-North E  | 3 | 4 | 1.346154 | ##### |
| 44 | 1 FR | 2020-14 | 5 FR-North E  | 3 | 5 | #####    | ##### |
| 45 | 1 FR | 2020-14 | 5 FR-Overall  | 1 | 1 | #####    | ##### |
| 46 | 1 FR | 2020-14 | 5 FR-Overall  | 1 | 2 | #####    | ##### |
| 47 | 1 FR | 2020-14 | 5 FR-Overall  | 1 | 3 | #####    | ##### |
| 48 | 1 FR | 2020-14 | 5 FR-Overall  | 1 | 4 | 1.10692  | ##### |
| 49 | 1 FR | 2020-14 | 5 FR-Overall  | 1 | 5 | #####    | ##### |
| 50 | 1 FR | 2020-14 | 5 FR-Overall  | 2 | 1 | #####    | ##### |
| 51 | 1 FR | 2020-14 | 5 FR-Overall  | 2 | 2 | #####    | ##### |
| 52 | 1 FR | 2020-14 | 5 FR-Overall  | 2 | 3 | #####    | ##### |
| 53 | 1 FR | 2020-14 | 5 FR-Overall  | 2 | 4 | 1.121349 | ##### |
| 54 | 1 FR | 2020-14 | 5 FR-Overall  | 2 | 5 | #####    | ##### |
| 55 | 1 FR | 2020-14 | 5 FR-Overall  | 3 | 1 | #####    | ##### |
| 56 | 1 FR | 2020-14 | 5 FR-Overall  | 3 | 2 | #####    | ##### |
| 57 | 1 FR | 2020-14 | 5 FR-Overall  | 3 | 3 | 1.080063 | ##### |
| 58 | 1 FR | 2020-14 | 5 FR-Overall  | 3 | 4 | 1.088673 | ##### |
| 59 | 1 FR | 2020-14 | 5 FR-Overall  | 3 |   |          |       |
| 60 | 1 FR | 2020-14 | 5 FR-Overall  | 3 |   |          |       |

|    |      |         |              |   |   |          |          |  |  |
|----|------|---------|--------------|---|---|----------|----------|--|--|
| 1  |      |         |              |   |   |          |          |  |  |
| 2  |      |         |              |   |   |          |          |  |  |
| 3  | 1 FR | 2020-14 | 5 FR-Overall | 3 | 5 | 1.000924 | #####    |  |  |
| 4  | 1 FR | 2020-14 | 5 FR-South E | 1 | 1 | 1.021463 | #####    |  |  |
| 5  | 1 FR | 2020-14 | 5 FR-South E | 1 | 2 | #####    | #####    |  |  |
| 6  | 1 FR | 2020-14 | 5 FR-South E | 1 | 3 | 1.175387 | #####    |  |  |
| 7  | 1 FR | 2020-14 | 5 FR-South E | 1 | 4 | 1.152645 | #####    |  |  |
| 8  | 1 FR | 2020-14 | 5 FR-South E | 1 | 5 | 1.252818 | #####    |  |  |
| 9  | 1 FR | 2020-14 | 5 FR-South E | 2 | 1 | #####    | #####    |  |  |
| 10 | 1 FR | 2020-14 | 5 FR-South E | 2 | 2 | 0.54     | #####    |  |  |
| 11 | 1 FR | 2020-14 | 5 FR-South E | 2 | 3 | 0.8      | #####    |  |  |
| 12 | 1 FR | 2020-14 | 5 FR-South E | 2 | 4 | 1.486111 | #####    |  |  |
| 13 | 1 FR | 2020-14 | 5 FR-South E | 2 | 5 | 1.025    | #####    |  |  |
| 14 | 1 FR | 2020-14 | 5 FR-South E | 3 | 1 | 1.067662 | #####    |  |  |
| 15 | 1 FR | 2020-14 | 5 FR-South E | 3 | 2 | #####    | #####    |  |  |
| 16 | 1 FR | 2020-14 | 5 FR-South E | 3 | 3 | 1.633333 | #####    |  |  |
| 17 | 1 FR | 2020-14 | 5 FR-South E | 3 | 4 | 0.64     | #####    |  |  |
| 18 | 1 FR | 2020-14 | 5 FR-South E | 3 | 5 | 1.647059 | 1.134484 |  |  |
| 19 | 1 FR | 2020-14 | 5 FR-South V | 1 | 1 | #####    | #####    |  |  |
| 20 | 1 FR | 2020-14 | 5 FR-South V | 1 | 2 | #####    | #####    |  |  |
| 21 | 1 FR | 2020-14 | 5 FR-South V | 1 | 3 | #####    | #####    |  |  |
| 22 | 1 FR | 2020-14 | 5 FR-South V | 1 | 4 | #####    | #####    |  |  |
| 23 | 1 FR | 2020-14 | 5 FR-South V | 1 | 5 | 1.05427  | #####    |  |  |
| 24 | 1 FR | 2020-14 | 5 FR-South V | 2 | 1 | #####    | #####    |  |  |
| 25 | 1 FR | 2020-14 | 5 FR-South V | 2 | 2 | #####    | #####    |  |  |
| 26 | 1 FR | 2020-14 | 5 FR-South V | 2 | 3 | #####    | #####    |  |  |
| 27 | 1 FR | 2020-14 | 5 FR-South V | 2 | 4 | #####    | #####    |  |  |
| 28 | 1 FR | 2020-14 | 5 FR-South V | 2 | 5 | 1        | #####    |  |  |
| 29 | 1 FR | 2020-14 | 5 FR-South V | 3 | 1 | #####    | #####    |  |  |
| 30 | 1 FR | 2020-14 | 5 FR-South V | 3 | 2 | #####    | #####    |  |  |
| 31 | 1 FR | 2020-14 | 5 FR-South V | 3 | 3 | 0.7      | #####    |  |  |
| 32 | 1 FR | 2020-14 | 5 FR-South V | 3 | 4 | 1.264706 | #####    |  |  |
| 33 | 1 FR | 2020-14 | 5 FR-South V | 3 | 5 | 1.111111 | #####    |  |  |
| 34 | 1 FR | 2020-14 | 5 FR-West    | 1 | 1 | 1.266514 | #####    |  |  |
| 35 | 1 FR | 2020-14 | 5 FR-West    | 1 | 2 | 1.256632 | #####    |  |  |
| 36 | 1 FR | 2020-14 | 5 FR-West    | 1 | 3 | 1.700362 | #####    |  |  |
| 37 | 1 FR | 2020-14 | 5 FR-West    | 1 | 4 | 1.248966 | #####    |  |  |
| 38 | 1 FR | 2020-14 | 5 FR-West    | 1 | 5 | #####    | #####    |  |  |
| 39 | 1 FR | 2020-14 | 5 FR-West    | 2 | 1 | 1.150844 | #####    |  |  |
| 40 | 1 FR | 2020-14 | 5 FR-West    | 2 | 2 | 0.71875  | #####    |  |  |
| 41 | 1 FR | 2020-14 | 5 FR-West    | 2 | 3 | 1        | #####    |  |  |
| 42 | 1 FR | 2020-14 | 5 FR-West    | 2 | 4 | 1.907895 | #####    |  |  |
| 43 | 1 FR | 2020-14 | 5 FR-West    | 2 | 5 | #####    | #####    |  |  |
| 44 | 1 FR | 2020-14 | 5 FR-West    | 3 | 1 | 1.382176 | #####    |  |  |
| 45 | 1 FR | 2020-14 | 5 FR-West    | 3 | 2 | 1.64     | #####    |  |  |
| 46 | 1 FR | 2020-14 | 5 FR-West    | 3 | 3 | 2.416667 | #####    |  |  |
| 47 | 1 FR | 2020-14 | 5 FR-West    | 3 | 4 | #####    | #####    |  |  |
| 48 | 1 FR | 2020-14 | 5 FR-West    | 3 | 5 | #####    | #####    |  |  |
| 49 | 1 FR | 2020-15 | 1 FR-Corse   | 1 | 1 | #####    | #####    |  |  |
| 50 | 1 FR | 2020-15 | 1 FR-Corse   | 1 | 3 | 0        | 0        |  |  |
| 51 | 1 FR | 2020-15 | 1 FR-Corse   | 1 | 4 | 1.292102 | #####    |  |  |
| 52 | 1 FR | 2020-15 | 1 FR-Corse   | 1 | 5 | #####    | #####    |  |  |
| 53 | 1 FR | 2020-15 | 1 FR-Corse   | 2 | 1 | #####    | #####    |  |  |
| 54 | 1 FR | 2020-15 | 1 FR-Corse   | 2 | 3 | 0        | 0        |  |  |
| 55 | 1 FR | 2020-15 | 1 FR-Corse   | 2 | 4 | 1        | 0        |  |  |
| 56 | 1 FR | 2020-15 | 1 FR-Corse   | 2 | 5 | 0        | 0        |  |  |
| 57 | 1 FR | 2020-15 | 1 FR-Corse   | 3 | 1 | #####    | #####    |  |  |
| 58 | 1 FR | 2020-15 | 1 FR-Corse   | 3 | 4 | 1.5      | #####    |  |  |
| 59 | 1 FR | 2020-15 | 1 FR-Corse   | 3 | 4 | 1.5      | #####    |  |  |
| 60 | 1 FR | 2020-15 | 1 FR-Corse   | 3 | 4 | 1.5      | #####    |  |  |

|    |      |         |               |   |   |          |          |  |
|----|------|---------|---------------|---|---|----------|----------|--|
| 1  |      |         |               |   |   |          |          |  |
| 2  |      |         |               |   |   |          |          |  |
| 3  | 1 FR | 2020-15 | 1 FR-Corse    | 3 | 5 | #####    | #####    |  |
| 4  | 1 FR | 2020-15 | 1 FR-Ile de F | 1 | 1 | 2.763567 | #####    |  |
| 5  | 1 FR | 2020-15 | 1 FR-Ile de F | 1 | 2 | 3.103469 | #####    |  |
| 6  | 1 FR | 2020-15 | 1 FR-Ile de F | 1 | 3 | 2.803799 | #####    |  |
| 7  | 1 FR | 2020-15 | 1 FR-Ile de F | 1 | 4 | 2.859907 | #####    |  |
| 8  | 1 FR | 2020-15 | 1 FR-Ile de F | 1 | 5 | 2.029965 | #####    |  |
| 9  | 1 FR | 2020-15 | 1 FR-Ile de F | 2 | 1 | 2.622251 | #####    |  |
| 10 | 1 FR | 2020-15 | 1 FR-Ile de F | 2 | 2 | 3.113636 | #####    |  |
| 11 | 1 FR | 2020-15 | 1 FR-Ile de F | 2 | 3 | 2.481481 | #####    |  |
| 12 | 1 FR | 2020-15 | 1 FR-Ile de F | 2 | 4 | 3.486486 | #####    |  |
| 13 | 1 FR | 2020-15 | 1 FR-Ile de F | 2 | 5 | 1.115385 | #####    |  |
| 14 | 1 FR | 2020-15 | 1 FR-Ile de F | 3 | 1 | 2.928413 | #####    |  |
| 15 | 1 FR | 2020-15 | 1 FR-Ile de F | 3 | 2 | 3.090909 | 1.195531 |  |
| 16 | 1 FR | 2020-15 | 1 FR-Ile de F | 3 | 3 | 3.071429 | 1.002469 |  |
| 17 | 1 FR | 2020-15 | 1 FR-Ile de F | 3 | 4 | 2.066667 | #####    |  |
| 18 | 1 FR | 2020-15 | 1 FR-Ile de F | 3 | 5 | 3.7      | 1.158134 |  |
| 19 | 1 FR | 2020-15 | 1 FR-North E  | 1 | 1 | 2.978332 | #####    |  |
| 20 | 1 FR | 2020-15 | 1 FR-North E  | 1 | 2 | 2.991204 | #####    |  |
| 21 | 1 FR | 2020-15 | 1 FR-North E  | 1 | 3 | 3.669616 | #####    |  |
| 22 | 1 FR | 2020-15 | 1 FR-North E  | 1 | 4 | 3.172787 | #####    |  |
| 23 | 1 FR | 2020-15 | 1 FR-North E  | 1 | 5 | 1.755562 | #####    |  |
| 24 | 1 FR | 2020-15 | 1 FR-North E  | 2 | 1 | 2.869114 | #####    |  |
| 25 | 1 FR | 2020-15 | 1 FR-North E  | 2 | 2 | 3.090909 | #####    |  |
| 26 | 1 FR | 2020-15 | 1 FR-North E  | 2 | 3 | 3.72043  | #####    |  |
| 27 | 1 FR | 2020-15 | 1 FR-North E  | 2 | 4 | 2.644068 | #####    |  |
| 28 | 1 FR | 2020-15 | 1 FR-North E  | 2 | 5 | 1.827586 | #####    |  |
| 29 | 1 FR | 2020-15 | 1 FR-North E  | 3 | 1 | 3.116873 | #####    |  |
| 30 | 1 FR | 2020-15 | 1 FR-North E  | 3 | 2 | 2.894737 | #####    |  |
| 31 | 1 FR | 2020-15 | 1 FR-North E  | 3 | 3 | 3.607143 | 1.304893 |  |
| 32 | 1 FR | 2020-15 | 1 FR-North E  | 3 | 4 | 3.904762 | 1.102378 |  |
| 33 | 1 FR | 2020-15 | 1 FR-North E  | 3 | 5 | 1.647059 | #####    |  |
| 34 | 1 FR | 2020-15 | 1 FR-Overall  | 1 | 1 | 3.215618 | #####    |  |
| 35 | 1 FR | 2020-15 | 1 FR-Overall  | 1 | 2 | 3.357914 | #####    |  |
| 36 | 1 FR | 2020-15 | 1 FR-Overall  | 1 | 3 | 3.585849 | #####    |  |
| 37 | 1 FR | 2020-15 | 1 FR-Overall  | 1 | 4 | 3.784922 | #####    |  |
| 38 | 1 FR | 2020-15 | 1 FR-Overall  | 1 | 5 | 1.683164 | #####    |  |
| 39 | 1 FR | 2020-15 | 1 FR-Overall  | 2 | 1 | 3.053314 | #####    |  |
| 40 | 1 FR | 2020-15 | 1 FR-Overall  | 2 | 2 | 3.517348 | #####    |  |
| 41 | 1 FR | 2020-15 | 1 FR-Overall  | 2 | 3 | 3.699657 | #####    |  |
| 42 | 1 FR | 2020-15 | 1 FR-Overall  | 2 | 4 | 3.436396 | #####    |  |
| 43 | 1 FR | 2020-15 | 1 FR-Overall  | 2 | 5 | 1.374421 | #####    |  |
| 44 | 1 FR | 2020-15 | 1 FR-Overall  | 3 | 1 | 3.397523 | #####    |  |
| 45 | 1 FR | 2020-15 | 1 FR-Overall  | 3 | 2 | 3.208753 | #####    |  |
| 46 | 1 FR | 2020-15 | 1 FR-Overall  | 3 | 3 | 3.467973 | #####    |  |
| 47 | 1 FR | 2020-15 | 1 FR-Overall  | 3 | 4 | 4.171597 | #####    |  |
| 48 | 1 FR | 2020-15 | 1 FR-Overall  | 3 | 5 | 2.159483 | #####    |  |
| 49 | 1 FR | 2020-15 | 1 FR-South E  | 1 | 1 | 3.806618 | #####    |  |
| 50 | 1 FR | 2020-15 | 1 FR-South E  | 1 | 2 | 3.492162 | #####    |  |
| 51 | 1 FR | 2020-15 | 1 FR-South E  | 1 | 3 | 4.365005 | #####    |  |
| 52 | 1 FR | 2020-15 | 1 FR-South E  | 1 | 4 | 4.904094 | #####    |  |
| 53 | 1 FR | 2020-15 | 1 FR-South E  | 1 | 5 | 1.569498 | #####    |  |
| 54 | 1 FR | 2020-15 | 1 FR-South E  | 2 | 1 | 3.621609 | #####    |  |
| 55 | 1 FR | 2020-15 | 1 FR-South E  | 2 | 2 | 4.757576 | #####    |  |
| 56 | 1 FR | 2020-15 | 1 FR-South E  | 2 | 3 | 3.473684 | #####    |  |
| 57 | 1 FR | 2020-15 | 1 FR-South E  | 2 | 4 | 4.922078 | #####    |  |
| 58 | 1 FR | 2020-15 | 1 FR-South E  | 2 | 5 | 1.166667 | #####    |  |
| 59 | 1 FR | 2020-15 | 1 FR-South E  | 2 |   |          |          |  |
| 60 | 1 FR | 2020-15 | 1 FR-South E  | 2 |   |          |          |  |

1  
2  
3  
4  
5  
6  
7  
8  
9  
10  
11  
12  
13  
14  
15  
16  
17  
18  
19  
20  
21  
22  
23  
24  
25  
26  
27  
28  
29  
30  
31  
32  
33  
34  
35  
36  
37  
38  
39  
40  
41  
42  
43  
44  
45  
46  
47  
48  
49  
50  
51  
52  
53  
54  
55  
56  
57  
58  
59  
60

|      |         |               |   |   |          |          |
|------|---------|---------------|---|---|----------|----------|
| 1 FR | 2020-15 | 1 FR-South E  | 3 | 1 | 4.006344 | #####    |
| 1 FR | 2020-15 | 1 FR-South E  | 3 | 2 | 2.529412 | #####    |
| 1 FR | 2020-15 | 1 FR-South E  | 3 | 3 | 5.24     | 1.578292 |
| 1 FR | 2020-15 | 1 FR-South E  | 3 | 4 | 4.882353 | 1.008515 |
| 1 FR | 2020-15 | 1 FR-South E  | 3 | 5 | 2.125    | #####    |
| 1 FR | 2020-15 | 1 FR-South V  | 1 | 1 | 2.954583 | #####    |
| 1 FR | 2020-15 | 1 FR-South V  | 1 | 2 | 2.82729  | #####    |
| 1 FR | 2020-15 | 1 FR-South V  | 1 | 3 | 3.285623 | #####    |
| 1 FR | 2020-15 | 1 FR-South V  | 1 | 4 | 3.799834 | #####    |
| 1 FR | 2020-15 | 1 FR-South V  | 1 | 5 | 1.156402 | #####    |
| 1 FR | 2020-15 | 1 FR-South V  | 2 | 1 | 2.975503 | #####    |
| 1 FR | 2020-15 | 1 FR-South V  | 2 | 2 | 3.285714 | #####    |
| 1 FR | 2020-15 | 1 FR-South V  | 2 | 3 | 3.913043 | #####    |
| 1 FR | 2020-15 | 1 FR-South V  | 2 | 4 | 3.188679 | #####    |
| 1 FR | 2020-15 | 1 FR-South V  | 2 | 5 | 0.96     | #####    |
| 1 FR | 2020-15 | 1 FR-South V  | 3 | 1 | 2.93482  | #####    |
| 1 FR | 2020-15 | 1 FR-South V  | 3 | 2 | 2.470588 | #####    |
| 1 FR | 2020-15 | 1 FR-South V  | 3 | 3 | 2.565217 | #####    |
| 1 FR | 2020-15 | 1 FR-South V  | 3 | 4 | 4.264706 | 1.009839 |
| 1 FR | 2020-15 | 1 FR-South V  | 3 | 5 | 1.4      | #####    |
| 1 FR | 2020-15 | 1 FR-West     | 1 | 1 | 3.611348 | #####    |
| 1 FR | 2020-15 | 1 FR-West     | 1 | 2 | 4.623549 | 1.067662 |
| 1 FR | 2020-15 | 1 FR-West     | 1 | 3 | 3.776607 | #####    |
| 1 FR | 2020-15 | 1 FR-West     | 1 | 4 | 3.829919 | #####    |
| 1 FR | 2020-15 | 1 FR-West     | 1 | 5 | 2.068091 | #####    |
| 1 FR | 2020-15 | 1 FR-West     | 2 | 1 | 3.232223 | #####    |
| 1 FR | 2020-15 | 1 FR-West     | 2 | 2 | 3.75     | #####    |
| 1 FR | 2020-15 | 1 FR-West     | 2 | 3 | 4.8125   | #####    |
| 1 FR | 2020-15 | 1 FR-West     | 2 | 4 | 2.838235 | #####    |
| 1 FR | 2020-15 | 1 FR-West     | 2 | 5 | 1.5625   | #####    |
| 1 FR | 2020-15 | 1 FR-West     | 3 | 1 | 4.053114 | #####    |
| 1 FR | 2020-15 | 1 FR-West     | 3 | 2 | 5.466667 | 1.964022 |
| 1 FR | 2020-15 | 1 FR-West     | 3 | 3 | 2.814815 | #####    |
| 1 FR | 2020-15 | 1 FR-West     | 3 | 4 | 4.931034 | 1.286603 |
| 1 FR | 2020-15 | 1 FR-West     | 3 | 5 | 3.222222 | 1.015757 |
| 1 FR | 2020-15 | 2 FR-Corse    | 1 | 1 | #####    | #####    |
| 1 FR | 2020-15 | 2 FR-Corse    | 1 | 3 | 0        | 0        |
| 1 FR | 2020-15 | 2 FR-Corse    | 1 | 4 | #####    | #####    |
| 1 FR | 2020-15 | 2 FR-Corse    | 1 | 5 | #####    | #####    |
| 1 FR | 2020-15 | 2 FR-Corse    | 2 | 1 | #####    | #####    |
| 1 FR | 2020-15 | 2 FR-Corse    | 2 | 3 | 0        | 0        |
| 1 FR | 2020-15 | 2 FR-Corse    | 2 | 4 | 1        | 0        |
| 1 FR | 2020-15 | 2 FR-Corse    | 2 | 5 | 0        | 0        |
| 1 FR | 2020-15 | 2 FR-Corse    | 3 | 1 | #####    | #####    |
| 1 FR | 2020-15 | 2 FR-Corse    | 3 | 4 | 0        | 0        |
| 1 FR | 2020-15 | 2 FR-Corse    | 3 | 5 | #####    | #####    |
| 1 FR | 2020-15 | 2 FR-Ile de F | 1 | 1 | 1.601445 | #####    |
| 1 FR | 2020-15 | 2 FR-Ile de F | 1 | 2 | 1.949761 | #####    |
| 1 FR | 2020-15 | 2 FR-Ile de F | 1 | 3 | 1.851738 | #####    |
| 1 FR | 2020-15 | 2 FR-Ile de F | 1 | 4 | 1.192055 | #####    |
| 1 FR | 2020-15 | 2 FR-Ile de F | 1 | 5 | 1.175072 | #####    |
| 1 FR | 2020-15 | 2 FR-Ile de F | 2 | 1 | 1.647306 | #####    |
| 1 FR | 2020-15 | 2 FR-Ile de F | 2 | 2 | 1.909091 | #####    |
| 1 FR | 2020-15 | 2 FR-Ile de F | 2 | 3 | 2.066667 | #####    |
| 1 FR | 2020-15 | 2 FR-Ile de F | 2 | 4 | 1.435897 | #####    |
| 1 FR | 2020-15 | 2 FR-Ile de F | 2 | 5 | #####    | #####    |



|    |      |         |               |   |   |          |       |  |
|----|------|---------|---------------|---|---|----------|-------|--|
| 1  |      |         |               |   |   |          |       |  |
| 2  |      |         |               |   |   |          |       |  |
| 3  | 1 FR | 2020-15 | 2 FR-Ile de F | 3 | 1 | 1.548456 | ##### |  |
| 4  | 1 FR | 2020-15 | 2 FR-Ile de F | 3 | 2 | 2        | ##### |  |
| 5  | 1 FR | 2020-15 | 2 FR-Ile de F | 3 | 3 | 1.666667 | ##### |  |
| 6  | 1 FR | 2020-15 | 2 FR-Ile de F | 3 | 4 | #####    | ##### |  |
| 7  | 1 FR | 2020-15 | 2 FR-Ile de F | 3 | 5 | 1.5      | ##### |  |
| 8  | 1 FR | 2020-15 | 2 FR-North E  | 1 | 1 | 1.52937  | ##### |  |
| 9  | 1 FR | 2020-15 | 2 FR-North E  | 1 | 2 | 1.803408 | ##### |  |
| 10 | 1 FR | 2020-15 | 2 FR-North E  | 1 | 3 | 1.732274 | ##### |  |
| 11 | 1 FR | 2020-15 | 2 FR-North E  | 1 | 4 | 1.622496 | ##### |  |
| 12 | 1 FR | 2020-15 | 2 FR-North E  | 1 | 5 | #####    | ##### |  |
| 13 | 1 FR | 2020-15 | 2 FR-North E  | 2 | 1 | 1.521361 | ##### |  |
| 14 | 1 FR | 2020-15 | 2 FR-North E  | 2 | 2 | 1.711111 | ##### |  |
| 15 | 1 FR | 2020-15 | 2 FR-North E  | 2 | 3 | 1.969697 | ##### |  |
| 16 | 1 FR | 2020-15 | 2 FR-North E  | 2 | 4 | 1.522388 | ##### |  |
| 17 | 1 FR | 2020-15 | 2 FR-North E  | 2 | 5 | #####    | ##### |  |
| 18 | 1 FR | 2020-15 | 2 FR-North E  | 3 | 1 | 1.539649 | ##### |  |
| 19 | 1 FR | 2020-15 | 2 FR-North E  | 3 | 2 | 1.894737 | ##### |  |
| 20 | 1 FR | 2020-15 | 2 FR-North E  | 3 | 3 | 1.451613 | ##### |  |
| 21 | 1 FR | 2020-15 | 2 FR-North E  | 3 | 4 | 1.772727 | ##### |  |
| 22 | 1 FR | 2020-15 | 2 FR-North E  | 3 | 5 | 1.058824 | ##### |  |
| 23 | 1 FR | 2020-15 | 2 FR-North E  | 3 | 5 | #####    | ##### |  |
| 24 | 1 FR | 2020-15 | 2 FR-Overall  | 1 | 1 | 1.504021 | ##### |  |
| 25 | 1 FR | 2020-15 | 2 FR-Overall  | 1 | 2 | 1.781305 | ##### |  |
| 26 | 1 FR | 2020-15 | 2 FR-Overall  | 1 | 3 | 1.742047 | ##### |  |
| 27 | 1 FR | 2020-15 | 2 FR-Overall  | 1 | 4 | 1.43769  | ##### |  |
| 28 | 1 FR | 2020-15 | 2 FR-Overall  | 1 | 5 | #####    | ##### |  |
| 29 | 1 FR | 2020-15 | 2 FR-Overall  | 2 | 1 | 1.517405 | ##### |  |
| 30 | 1 FR | 2020-15 | 2 FR-Overall  | 2 | 2 | 1.76594  | ##### |  |
| 31 | 1 FR | 2020-15 | 2 FR-Overall  | 2 | 3 | 2.020079 | ##### |  |
| 32 | 1 FR | 2020-15 | 2 FR-Overall  | 2 | 4 | 1.38657  | ##### |  |
| 33 | 1 FR | 2020-15 | 2 FR-Overall  | 2 | 5 | #####    | ##### |  |
| 34 | 1 FR | 2020-15 | 2 FR-Overall  | 3 | 1 | 1.488893 | ##### |  |
| 35 | 1 FR | 2020-15 | 2 FR-Overall  | 3 | 2 | 1.796311 | ##### |  |
| 36 | 1 FR | 2020-15 | 2 FR-Overall  | 3 | 3 | 1.461157 | ##### |  |
| 37 | 1 FR | 2020-15 | 2 FR-Overall  | 3 | 4 | 1.49728  | ##### |  |
| 38 | 1 FR | 2020-15 | 2 FR-Overall  | 3 | 5 | 1.146258 | ##### |  |
| 39 | 1 FR | 2020-15 | 2 FR-South E  | 1 | 1 | 1.561645 | ##### |  |
| 40 | 1 FR | 2020-15 | 2 FR-South E  | 1 | 2 | 1.786925 | ##### |  |
| 41 | 1 FR | 2020-15 | 2 FR-South E  | 1 | 3 | 1.812519 | ##### |  |
| 42 | 1 FR | 2020-15 | 2 FR-South E  | 1 | 4 | 1.627379 | ##### |  |
| 43 | 1 FR | 2020-15 | 2 FR-South E  | 1 | 5 | #####    | ##### |  |
| 44 | 1 FR | 2020-15 | 2 FR-South E  | 2 | 1 | 1.561143 | ##### |  |
| 45 | 1 FR | 2020-15 | 2 FR-South E  | 2 | 2 | 1.925    | ##### |  |
| 46 | 1 FR | 2020-15 | 2 FR-South E  | 2 | 3 | 2.114754 | ##### |  |
| 47 | 1 FR | 2020-15 | 2 FR-South E  | 2 | 4 | 1.512195 | ##### |  |
| 48 | 1 FR | 2020-15 | 2 FR-South E  | 2 | 5 | #####    | ##### |  |
| 49 | 1 FR | 2020-15 | 2 FR-South E  | 3 | 1 | 1.562195 | ##### |  |
| 50 | 1 FR | 2020-15 | 2 FR-South E  | 3 | 2 | 1.666667 | ##### |  |
| 51 | 1 FR | 2020-15 | 2 FR-South E  | 3 | 3 | 1.518519 | ##### |  |
| 52 | 1 FR | 2020-15 | 2 FR-South E  | 3 | 4 | 1.771429 | ##### |  |
| 53 | 1 FR | 2020-15 | 2 FR-South E  | 3 | 5 | 1.176471 | ##### |  |
| 54 | 1 FR | 2020-15 | 2 FR-South V  | 1 | 1 | 1.456536 | ##### |  |
| 55 | 1 FR | 2020-15 | 2 FR-South V  | 1 | 2 | 1.520191 | ##### |  |
| 56 | 1 FR | 2020-15 | 2 FR-South V  | 1 | 3 | 1.956184 | ##### |  |
| 57 | 1 FR | 2020-15 | 2 FR-South V  | 1 | 4 | 1.356793 | ##### |  |
| 58 | 1 FR | 2020-15 | 2 FR-South V  | 1 | 5 | #####    | ##### |  |
| 59 | 1 FR | 2020-15 | 2 FR-South V  | 1 | 5 | #####    | ##### |  |
| 60 | 1 FR | 2020-15 | 2 FR-South V  | 2 | 1 | 1.52128  | ##### |  |

|    |      |         |               |   |   |          |       |  |
|----|------|---------|---------------|---|---|----------|-------|--|
| 1  |      |         |               |   |   |          |       |  |
| 2  |      |         |               |   |   |          |       |  |
| 3  | 1 FR | 2020-15 | 2 FR-South V  | 2 | 2 | 1.357143 | ##### |  |
| 4  | 1 FR | 2020-15 | 2 FR-South V  | 2 | 3 | 2.208333 | ##### |  |
| 5  | 1 FR | 2020-15 | 2 FR-South V  | 2 | 4 | 1.483871 | ##### |  |
| 6  | 1 FR | 2020-15 | 2 FR-South V  | 2 | 5 | #####    | ##### |  |
| 7  | 1 FR | 2020-15 | 2 FR-South V  | 3 | 1 | 1.393159 | ##### |  |
| 8  | 1 FR | 2020-15 | 2 FR-South V  | 3 | 2 | 1.647059 | ##### |  |
| 9  | 1 FR | 2020-15 | 2 FR-South V  | 3 | 3 | 1.666667 | ##### |  |
| 10 | 1 FR | 2020-15 | 2 FR-South V  | 3 | 4 | 1.25     | ##### |  |
| 11 | 1 FR | 2020-15 | 2 FR-South V  | 3 | 5 | #####    | ##### |  |
| 12 | 1 FR | 2020-15 | 2 FR-West     | 1 | 1 | 1.428203 | ##### |  |
| 13 | 1 FR | 2020-15 | 2 FR-West     | 1 | 2 | 1.839684 | ##### |  |
| 14 | 1 FR | 2020-15 | 2 FR-West     | 1 | 3 | 1.456664 | ##### |  |
| 15 | 1 FR | 2020-15 | 2 FR-West     | 1 | 4 | 1.335399 | ##### |  |
| 16 | 1 FR | 2020-15 | 2 FR-West     | 1 | 5 | 1.153777 | ##### |  |
| 17 | 1 FR | 2020-15 | 2 FR-West     | 2 | 1 | 1.397521 | ##### |  |
| 18 | 1 FR | 2020-15 | 2 FR-West     | 2 | 2 | 1.877193 | ##### |  |
| 19 | 1 FR | 2020-15 | 2 FR-West     | 2 | 3 | 1.876923 | ##### |  |
| 20 | 1 FR | 2020-15 | 2 FR-West     | 2 | 4 | #####    | ##### |  |
| 21 | 1 FR | 2020-15 | 2 FR-West     | 2 | 5 | 1.030303 | ##### |  |
| 22 | 1 FR | 2020-15 | 2 FR-West     | 3 | 1 | 1.463509 | ##### |  |
| 23 | 1 FR | 2020-15 | 2 FR-West     | 3 | 2 | 1.8      | ##### |  |
| 24 | 1 FR | 2020-15 | 2 FR-West     | 3 | 3 | 1.1      | ##### |  |
| 25 | 1 FR | 2020-15 | 2 FR-West     | 3 | 4 | 1.724138 | ##### |  |
| 26 | 1 FR | 2020-15 | 2 FR-West     | 3 | 5 | 1.444444 | ##### |  |
| 27 | 1 FR | 2020-15 | 3 FR-Corse    | 1 | 1 | 0        | 0     |  |
| 28 | 1 FR | 2020-15 | 3 FR-Corse    | 1 | 3 | 0        | 0     |  |
| 29 | 1 FR | 2020-15 | 3 FR-Corse    | 1 | 4 | 0        | 0     |  |
| 30 | 1 FR | 2020-15 | 3 FR-Corse    | 1 | 5 | 0        | 0     |  |
| 31 | 1 FR | 2020-15 | 3 FR-Corse    | 2 | 1 | 0        | 0     |  |
| 32 | 1 FR | 2020-15 | 3 FR-Corse    | 2 | 3 | 0        | 0     |  |
| 33 | 1 FR | 2020-15 | 3 FR-Corse    | 2 | 4 | 0        | 0     |  |
| 34 | 1 FR | 2020-15 | 3 FR-Corse    | 2 | 5 | 0        | 0     |  |
| 35 | 1 FR | 2020-15 | 3 FR-Corse    | 3 | 1 | 0        | 0     |  |
| 36 | 1 FR | 2020-15 | 3 FR-Corse    | 3 | 4 | 0        | 0     |  |
| 37 | 1 FR | 2020-15 | 3 FR-Corse    | 3 | 5 | 0        | 0     |  |
| 38 | 1 FR | 2020-15 | 3 FR-Corse    | 3 | 5 | 0        | 0     |  |
| 39 | 1 FR | 2020-15 | 3 FR-Ile de F | 1 | 1 | #####    | ##### |  |
| 40 | 1 FR | 2020-15 | 3 FR-Ile de F | 1 | 2 | 0        | 0     |  |
| 41 | 1 FR | 2020-15 | 3 FR-Ile de F | 1 | 3 | 0        | 0     |  |
| 42 | 1 FR | 2020-15 | 3 FR-Ile de F | 1 | 4 | 0        | 0     |  |
| 43 | 1 FR | 2020-15 | 3 FR-Ile de F | 1 | 5 | #####    | ##### |  |
| 44 | 1 FR | 2020-15 | 3 FR-Ile de F | 2 | 1 | #####    | ##### |  |
| 45 | 1 FR | 2020-15 | 3 FR-Ile de F | 2 | 2 | 0        | 0     |  |
| 46 | 1 FR | 2020-15 | 3 FR-Ile de F | 2 | 3 | 0        | 0     |  |
| 47 | 1 FR | 2020-15 | 3 FR-Ile de F | 2 | 4 | 0        | 0     |  |
| 48 | 1 FR | 2020-15 | 3 FR-Ile de F | 2 | 5 | #####    | ##### |  |
| 49 | 1 FR | 2020-15 | 3 FR-Ile de F | 3 | 1 | 0        | 0     |  |
| 50 | 1 FR | 2020-15 | 3 FR-Ile de F | 3 | 2 | 0        | 0     |  |
| 51 | 1 FR | 2020-15 | 3 FR-Ile de F | 3 | 3 | 0        | 0     |  |
| 52 | 1 FR | 2020-15 | 3 FR-Ile de F | 3 | 4 | 0        | 0     |  |
| 53 | 1 FR | 2020-15 | 3 FR-Ile de F | 3 | 5 | 0        | 0     |  |
| 54 | 1 FR | 2020-15 | 3 FR-North E  | 1 | 1 | #####    | ##### |  |
| 55 | 1 FR | 2020-15 | 3 FR-North E  | 1 | 2 | #####    | ##### |  |
| 56 | 1 FR | 2020-15 | 3 FR-North E  | 1 | 3 | #####    | ##### |  |
| 57 | 1 FR | 2020-15 | 3 FR-North E  | 1 | 4 | #####    | ##### |  |
| 58 | 1 FR | 2020-15 | 3 FR-North E  | 1 | 5 | 0        | 0     |  |
| 59 | 1 FR | 2020-15 | 3 FR-North E  | 2 | 1 | #####    | ##### |  |
| 60 | 1 FR | 2020-15 | 3 FR-North E  | 2 | 1 | #####    | ##### |  |

|    |      |         |              |   |   |       |       |  |
|----|------|---------|--------------|---|---|-------|-------|--|
| 1  |      |         |              |   |   |       |       |  |
| 2  |      |         |              |   |   |       |       |  |
| 3  | 1 FR | 2020-15 | 3 FR-North E | 2 | 2 | ##### | ##### |  |
| 4  | 1 FR | 2020-15 | 3 FR-North E | 2 | 3 | ##### | ##### |  |
| 5  | 1 FR | 2020-15 | 3 FR-North E | 2 | 4 | ##### | ##### |  |
| 6  | 1 FR | 2020-15 | 3 FR-North E | 2 | 5 | 0     | 0     |  |
| 7  | 1 FR | 2020-15 | 3 FR-North E | 3 | 1 | 0     | 0     |  |
| 8  | 1 FR | 2020-15 | 3 FR-North E | 3 | 2 | 0     | 0     |  |
| 9  | 1 FR | 2020-15 | 3 FR-North E | 3 | 3 | 0     | 0     |  |
| 10 | 1 FR | 2020-15 | 3 FR-North E | 3 | 4 | 0     | 0     |  |
| 11 | 1 FR | 2020-15 | 3 FR-North E | 3 | 5 | 0     | 0     |  |
| 12 | 1 FR | 2020-15 | 3 FR-Overall | 1 | 1 | ##### | ##### |  |
| 13 | 1 FR | 2020-15 | 3 FR-Overall | 1 | 2 | ##### | ##### |  |
| 14 | 1 FR | 2020-15 | 3 FR-Overall | 1 | 3 | ##### | ##### |  |
| 15 | 1 FR | 2020-15 | 3 FR-Overall | 1 | 4 | ##### | ##### |  |
| 16 | 1 FR | 2020-15 | 3 FR-Overall | 1 | 5 | ##### | ##### |  |
| 17 | 1 FR | 2020-15 | 3 FR-Overall | 2 | 1 | ##### | ##### |  |
| 18 | 1 FR | 2020-15 | 3 FR-Overall | 2 | 2 | ##### | ##### |  |
| 19 | 1 FR | 2020-15 | 3 FR-Overall | 2 | 3 | ##### | ##### |  |
| 20 | 1 FR | 2020-15 | 3 FR-Overall | 2 | 4 | ##### | ##### |  |
| 21 | 1 FR | 2020-15 | 3 FR-Overall | 2 | 5 | ##### | ##### |  |
| 22 | 1 FR | 2020-15 | 3 FR-Overall | 3 | 1 | ##### | ##### |  |
| 23 | 1 FR | 2020-15 | 3 FR-Overall | 3 | 2 | 0     | 0     |  |
| 24 | 1 FR | 2020-15 | 3 FR-Overall | 3 | 3 | ##### | ##### |  |
| 25 | 1 FR | 2020-15 | 3 FR-Overall | 3 | 4 | ##### | ##### |  |
| 26 | 1 FR | 2020-15 | 3 FR-Overall | 3 | 5 | 0     | 0     |  |
| 27 | 1 FR | 2020-15 | 3 FR-South E | 1 | 1 | 0     | 0     |  |
| 28 | 1 FR | 2020-15 | 3 FR-South E | 1 | 2 | 0     | 0     |  |
| 29 | 1 FR | 2020-15 | 3 FR-South E | 1 | 3 | 0     | 0     |  |
| 30 | 1 FR | 2020-15 | 3 FR-South E | 1 | 4 | 0     | 0     |  |
| 31 | 1 FR | 2020-15 | 3 FR-South E | 1 | 5 | 0     | 0     |  |
| 32 | 1 FR | 2020-15 | 3 FR-South E | 2 | 1 | 0     | 0     |  |
| 33 | 1 FR | 2020-15 | 3 FR-South E | 2 | 2 | 0     | 0     |  |
| 34 | 1 FR | 2020-15 | 3 FR-South E | 2 | 3 | 0     | 0     |  |
| 35 | 1 FR | 2020-15 | 3 FR-South E | 2 | 4 | 0     | 0     |  |
| 36 | 1 FR | 2020-15 | 3 FR-South E | 2 | 5 | 0     | 0     |  |
| 37 | 1 FR | 2020-15 | 3 FR-South E | 3 | 1 | 0     | 0     |  |
| 38 | 1 FR | 2020-15 | 3 FR-South E | 3 | 2 | 0     | 0     |  |
| 39 | 1 FR | 2020-15 | 3 FR-South E | 3 | 3 | 0     | 0     |  |
| 40 | 1 FR | 2020-15 | 3 FR-South E | 3 | 4 | 0     | 0     |  |
| 41 | 1 FR | 2020-15 | 3 FR-South E | 3 | 5 | 0     | 0     |  |
| 42 | 1 FR | 2020-15 | 3 FR-South V | 1 | 1 | ##### | ##### |  |
| 43 | 1 FR | 2020-15 | 3 FR-South V | 1 | 2 | 0     | 0     |  |
| 44 | 1 FR | 2020-15 | 3 FR-South V | 1 | 3 | ##### | ##### |  |
| 45 | 1 FR | 2020-15 | 3 FR-South V | 1 | 4 | ##### | ##### |  |
| 46 | 1 FR | 2020-15 | 3 FR-South V | 1 | 5 | 0     | 0     |  |
| 47 | 1 FR | 2020-15 | 3 FR-South V | 2 | 1 | ##### | ##### |  |
| 48 | 1 FR | 2020-15 | 3 FR-South V | 2 | 2 | 0     | 0     |  |
| 49 | 1 FR | 2020-15 | 3 FR-South V | 2 | 3 | ##### | ##### |  |
| 50 | 1 FR | 2020-15 | 3 FR-South V | 2 | 4 | 0     | 0     |  |
| 51 | 1 FR | 2020-15 | 3 FR-South V | 2 | 5 | 0     | 0     |  |
| 52 | 1 FR | 2020-15 | 3 FR-South V | 3 | 1 | ##### | ##### |  |
| 53 | 1 FR | 2020-15 | 3 FR-South V | 3 | 2 | 0     | 0     |  |
| 54 | 1 FR | 2020-15 | 3 FR-South V | 3 | 3 | ##### | ##### |  |
| 55 | 1 FR | 2020-15 | 3 FR-South V | 3 | 4 | ##### | ##### |  |
| 56 | 1 FR | 2020-15 | 3 FR-South V | 3 | 5 | 0     | 0     |  |
| 57 | 1 FR | 2020-15 | 3 FR-South V | 3 | 1 | ##### | ##### |  |
| 58 | 1 FR | 2020-15 | 3 FR-South V | 3 | 2 | 0     | 0     |  |
| 59 | 1 FR | 2020-15 | 3 FR-South V | 3 | 3 | ##### | ##### |  |
| 60 | 1 FR | 2020-15 | 3 FR-South V | 3 | 4 | ##### | ##### |  |
|    | 1 FR | 2020-15 | 3 FR-South V | 3 | 5 | 0     | 0     |  |
|    | 1 FR | 2020-15 | 3 FR-West    | 1 | 1 | ##### | ##### |  |
|    | 1 FR | 2020-15 | 3 FR-West    | 1 | 2 | ##### | ##### |  |

|    |      |         |               |   |   |          |       |  |
|----|------|---------|---------------|---|---|----------|-------|--|
| 1  |      |         |               |   |   |          |       |  |
| 2  |      |         |               |   |   |          |       |  |
| 3  | 1 FR | 2020-15 | 3 FR-West     | 1 | 3 | #####    | ##### |  |
| 4  | 1 FR | 2020-15 | 3 FR-West     | 1 | 4 | 0        | 0     |  |
| 5  | 1 FR | 2020-15 | 3 FR-West     | 1 | 5 | 0        | 0     |  |
| 6  | 1 FR | 2020-15 | 3 FR-West     | 2 | 1 | #####    | ##### |  |
| 7  | 1 FR | 2020-15 | 3 FR-West     | 2 | 2 | #####    | ##### |  |
| 8  | 1 FR | 2020-15 | 3 FR-West     | 2 | 3 | #####    | ##### |  |
| 9  | 1 FR | 2020-15 | 3 FR-West     | 2 | 4 | 0        | 0     |  |
| 10 | 1 FR | 2020-15 | 3 FR-West     | 2 | 5 | 0        | 0     |  |
| 11 | 1 FR | 2020-15 | 3 FR-West     | 3 | 1 | 0        | 0     |  |
| 12 | 1 FR | 2020-15 | 3 FR-West     | 3 | 2 | 0        | 0     |  |
| 13 | 1 FR | 2020-15 | 3 FR-West     | 3 | 3 | 0        | 0     |  |
| 14 | 1 FR | 2020-15 | 3 FR-West     | 3 | 4 | 0        | 0     |  |
| 15 | 1 FR | 2020-15 | 3 FR-West     | 3 | 5 | 0        | 0     |  |
| 16 | 1 FR | 2020-15 | 4 FR-Corse    | 1 | 1 | #####    | ##### |  |
| 17 | 1 FR | 2020-15 | 4 FR-Corse    | 1 | 3 | 0        | 0     |  |
| 18 | 1 FR | 2020-15 | 4 FR-Corse    | 1 | 4 | #####    | ##### |  |
| 19 | 1 FR | 2020-15 | 4 FR-Corse    | 1 | 5 | 0        | 0     |  |
| 20 | 1 FR | 2020-15 | 4 FR-Corse    | 2 | 1 | 0        | 0     |  |
| 21 | 1 FR | 2020-15 | 4 FR-Corse    | 2 | 3 | 0        | 0     |  |
| 22 | 1 FR | 2020-15 | 4 FR-Corse    | 2 | 4 | 0        | 0     |  |
| 23 | 1 FR | 2020-15 | 4 FR-Corse    | 2 | 5 | 0        | 0     |  |
| 24 | 1 FR | 2020-15 | 4 FR-Corse    | 2 | 5 | 0        | 0     |  |
| 25 | 1 FR | 2020-15 | 4 FR-Corse    | 3 | 1 | #####    | ##### |  |
| 26 | 1 FR | 2020-15 | 4 FR-Corse    | 3 | 4 | 1.5      | ##### |  |
| 27 | 1 FR | 2020-15 | 4 FR-Corse    | 3 | 5 | 0        | 0     |  |
| 28 | 1 FR | 2020-15 | 4 FR-Ile de F | 1 | 1 | #####    | ##### |  |
| 29 | 1 FR | 2020-15 | 4 FR-Ile de F | 1 | 2 | #####    | ##### |  |
| 30 | 1 FR | 2020-15 | 4 FR-Ile de F | 1 | 3 | #####    | ##### |  |
| 31 | 1 FR | 2020-15 | 4 FR-Ile de F | 1 | 4 | #####    | ##### |  |
| 32 | 1 FR | 2020-15 | 4 FR-Ile de F | 1 | 5 | #####    | ##### |  |
| 33 | 1 FR | 2020-15 | 4 FR-Ile de F | 2 | 1 | #####    | ##### |  |
| 34 | 1 FR | 2020-15 | 4 FR-Ile de F | 2 | 2 | #####    | ##### |  |
| 35 | 1 FR | 2020-15 | 4 FR-Ile de F | 2 | 3 | #####    | ##### |  |
| 36 | 1 FR | 2020-15 | 4 FR-Ile de F | 2 | 4 | #####    | ##### |  |
| 37 | 1 FR | 2020-15 | 4 FR-Ile de F | 2 | 5 | 0        | 0     |  |
| 38 | 1 FR | 2020-15 | 4 FR-Ile de F | 3 | 1 | #####    | ##### |  |
| 39 | 1 FR | 2020-15 | 4 FR-Ile de F | 3 | 2 | #####    | ##### |  |
| 40 | 1 FR | 2020-15 | 4 FR-Ile de F | 3 | 3 | #####    | ##### |  |
| 41 | 1 FR | 2020-15 | 4 FR-Ile de F | 3 | 4 | #####    | ##### |  |
| 42 | 1 FR | 2020-15 | 4 FR-Ile de F | 3 | 5 | #####    | ##### |  |
| 43 | 1 FR | 2020-15 | 4 FR-North E  | 1 | 1 | #####    | ##### |  |
| 44 | 1 FR | 2020-15 | 4 FR-North E  | 1 | 2 | #####    | ##### |  |
| 45 | 1 FR | 2020-15 | 4 FR-North E  | 1 | 3 | 1.228091 | ##### |  |
| 46 | 1 FR | 2020-15 | 4 FR-North E  | 1 | 4 | #####    | ##### |  |
| 47 | 1 FR | 2020-15 | 4 FR-North E  | 1 | 5 | 0        | 0     |  |
| 48 | 1 FR | 2020-15 | 4 FR-North E  | 2 | 1 | #####    | ##### |  |
| 49 | 1 FR | 2020-15 | 4 FR-North E  | 2 | 2 | 0        | 0     |  |
| 50 | 1 FR | 2020-15 | 4 FR-North E  | 2 | 3 | #####    | ##### |  |
| 51 | 1 FR | 2020-15 | 4 FR-North E  | 2 | 4 | 0.5      | ##### |  |
| 52 | 1 FR | 2020-15 | 4 FR-North E  | 2 | 5 | 0        | 0     |  |
| 53 | 1 FR | 2020-15 | 4 FR-North E  | 3 | 1 | #####    | ##### |  |
| 54 | 1 FR | 2020-15 | 4 FR-North E  | 3 | 2 | #####    | ##### |  |
| 55 | 1 FR | 2020-15 | 4 FR-North E  | 3 | 3 | 1.566667 | ##### |  |
| 56 | 1 FR | 2020-15 | 4 FR-North E  | 3 | 4 | #####    | ##### |  |
| 57 | 1 FR | 2020-15 | 4 FR-North E  | 3 | 5 | 0        | 0     |  |
| 58 | 1 FR | 2020-15 | 4 FR-Overall  | 1 | 1 | #####    | ##### |  |
| 59 | 1 FR | 2020-15 | 4 FR-Overall  | 1 | 2 | #####    | ##### |  |
| 60 | 1 FR | 2020-15 | 4 FR-Overall  | 1 | 2 | #####    | ##### |  |

|    |      |         |              |   |   |          |          |  |
|----|------|---------|--------------|---|---|----------|----------|--|
| 1  |      |         |              |   |   |          |          |  |
| 2  |      |         |              |   |   |          |          |  |
| 3  | 1 FR | 2020-15 | 4 FR-Overall | 1 | 3 | 1.226839 | #####    |  |
| 4  | 1 FR | 2020-15 | 4 FR-Overall | 1 | 4 | 1.081895 | #####    |  |
| 5  | 1 FR | 2020-15 | 4 FR-Overall | 1 | 5 | #####    | #####    |  |
| 6  | 1 FR | 2020-15 | 4 FR-Overall | 2 | 1 | #####    | #####    |  |
| 7  | 1 FR | 2020-15 | 4 FR-Overall | 2 | 2 | #####    | #####    |  |
| 8  | 1 FR | 2020-15 | 4 FR-Overall | 2 | 3 | #####    | #####    |  |
| 9  | 1 FR | 2020-15 | 4 FR-Overall | 2 | 4 | #####    | #####    |  |
| 10 | 1 FR | 2020-15 | 4 FR-Overall | 2 | 5 | #####    | #####    |  |
| 11 | 1 FR | 2020-15 | 4 FR-Overall | 3 | 1 | 1.048973 | #####    |  |
| 12 | 1 FR | 2020-15 | 4 FR-Overall | 3 | 2 | #####    | #####    |  |
| 13 | 1 FR | 2020-15 | 4 FR-Overall | 3 | 3 | 1.494596 | #####    |  |
| 14 | 1 FR | 2020-15 | 4 FR-Overall | 3 | 4 | 1.283184 | #####    |  |
| 15 | 1 FR | 2020-15 | 4 FR-Overall | 3 | 5 | #####    | #####    |  |
| 16 | 1 FR | 2020-15 | 4 FR-South E | 1 | 1 | 1.29663  | #####    |  |
| 17 | 1 FR | 2020-15 | 4 FR-South E | 1 | 2 | 1.109274 | #####    |  |
| 18 | 1 FR | 2020-15 | 4 FR-South E | 1 | 3 | 1.847483 | #####    |  |
| 19 | 1 FR | 2020-15 | 4 FR-South E | 1 | 4 | 1.744853 | #####    |  |
| 20 | 1 FR | 2020-15 | 4 FR-South E | 1 | 5 | 0        | 0        |  |
| 21 | 1 FR | 2020-15 | 4 FR-South E | 2 | 1 | #####    | #####    |  |
| 22 | 1 FR | 2020-15 | 4 FR-South E | 2 | 2 | 1.484848 | #####    |  |
| 23 | 1 FR | 2020-15 | 4 FR-South E | 2 | 3 | #####    | #####    |  |
| 24 | 1 FR | 2020-15 | 4 FR-South E | 2 | 4 | 1.367089 | #####    |  |
| 25 | 1 FR | 2020-15 | 4 FR-South E | 2 | 5 | 0        | 0        |  |
| 26 | 1 FR | 2020-15 | 4 FR-South E | 3 | 1 | 1.684266 | #####    |  |
| 27 | 1 FR | 2020-15 | 4 FR-South E | 3 | 2 | #####    | #####    |  |
| 28 | 1 FR | 2020-15 | 4 FR-South E | 3 | 3 | 2.8      | 1.149727 |  |
| 29 | 1 FR | 2020-15 | 4 FR-South E | 3 | 4 | 2.2      | #####    |  |
| 30 | 1 FR | 2020-15 | 4 FR-South E | 3 | 5 | 0        | 0        |  |
| 31 | 1 FR | 2020-15 | 4 FR-South V | 1 | 1 | #####    | #####    |  |
| 32 | 1 FR | 2020-15 | 4 FR-South V | 1 | 2 | #####    | #####    |  |
| 33 | 1 FR | 2020-15 | 4 FR-South V | 1 | 3 | #####    | #####    |  |
| 34 | 1 FR | 2020-15 | 4 FR-South V | 1 | 4 | 1.392771 | #####    |  |
| 35 | 1 FR | 2020-15 | 4 FR-South V | 1 | 5 | #####    | #####    |  |
| 36 | 1 FR | 2020-15 | 4 FR-South V | 2 | 1 | #####    | #####    |  |
| 37 | 1 FR | 2020-15 | 4 FR-South V | 2 | 2 | #####    | #####    |  |
| 38 | 1 FR | 2020-15 | 4 FR-South V | 2 | 3 | #####    | #####    |  |
| 39 | 1 FR | 2020-15 | 4 FR-South V | 2 | 4 | #####    | #####    |  |
| 40 | 1 FR | 2020-15 | 4 FR-South V | 2 | 5 | #####    | #####    |  |
| 41 | 1 FR | 2020-15 | 4 FR-South V | 3 | 1 | #####    | #####    |  |
| 42 | 1 FR | 2020-15 | 4 FR-South V | 3 | 2 | #####    | #####    |  |
| 43 | 1 FR | 2020-15 | 4 FR-South V | 3 | 3 | #####    | #####    |  |
| 44 | 1 FR | 2020-15 | 4 FR-South V | 3 | 4 | 1.705882 | #####    |  |
| 45 | 1 FR | 2020-15 | 4 FR-South V | 3 | 5 | 0        | 0        |  |
| 46 | 1 FR | 2020-15 | 4 FR-West    | 1 | 1 | 1.166428 | #####    |  |
| 47 | 1 FR | 2020-15 | 4 FR-West    | 1 | 2 | 1.666286 | #####    |  |
| 48 | 1 FR | 2020-15 | 4 FR-West    | 1 | 3 | 1.666463 | #####    |  |
| 49 | 1 FR | 2020-15 | 4 FR-West    | 1 | 4 | 1.068819 | #####    |  |
| 50 | 1 FR | 2020-15 | 4 FR-West    | 1 | 5 | #####    | #####    |  |
| 51 | 1 FR | 2020-15 | 4 FR-West    | 2 | 1 | 1.011429 | #####    |  |
| 52 | 1 FR | 2020-15 | 4 FR-West    | 2 | 2 | 1.333333 | #####    |  |
| 53 | 1 FR | 2020-15 | 4 FR-West    | 2 | 3 | 1.8125   | #####    |  |
| 54 | 1 FR | 2020-15 | 4 FR-West    | 2 | 4 | #####    | #####    |  |
| 55 | 1 FR | 2020-15 | 4 FR-West    | 2 | 5 | #####    | #####    |  |
| 56 | 1 FR | 2020-15 | 4 FR-West    | 3 | 1 | 1.347094 | #####    |  |
| 57 | 1 FR | 2020-15 | 4 FR-West    | 3 | 2 | 2        | 1.316696 |  |
| 58 | 1 FR | 2020-15 | 4 FR-West    | 3 | 3 | 1.535714 | #####    |  |
| 59 | 1 FR | 2020-15 | 4 FR-West    | 3 |   |          |          |  |
| 60 | 1 FR | 2020-15 | 4 FR-West    | 3 |   |          |          |  |

|    |      |         |               |   |   |          |          |   |
|----|------|---------|---------------|---|---|----------|----------|---|
| 1  |      |         |               |   |   |          |          |   |
| 2  |      |         |               |   |   |          |          |   |
| 3  | 1 FR | 2020-15 | 4 FR-West     | 3 | 4 | 1.275862 | #####    |   |
| 4  | 1 FR | 2020-15 | 4 FR-West     | 3 | 5 | 0        |          | 0 |
| 5  | 1 FR | 2020-15 | 5 FR-Corse    | 1 | 1 | 0        |          | 0 |
| 6  | 1 FR | 2020-15 | 5 FR-Corse    | 1 | 3 | 0        |          | 0 |
| 7  | 1 FR | 2020-15 | 5 FR-Corse    | 1 | 4 | 0        |          | 0 |
| 8  | 1 FR | 2020-15 | 5 FR-Corse    | 1 | 5 | 0        |          | 0 |
| 9  | 1 FR | 2020-15 | 5 FR-Corse    | 2 | 1 | 0        |          | 0 |
| 10 | 1 FR | 2020-15 | 5 FR-Corse    | 2 | 3 | 0        |          | 0 |
| 11 | 1 FR | 2020-15 | 5 FR-Corse    | 2 | 4 | 0        |          | 0 |
| 12 | 1 FR | 2020-15 | 5 FR-Corse    | 2 | 5 | 0        |          | 0 |
| 13 | 1 FR | 2020-15 | 5 FR-Corse    | 3 | 1 | 0        |          | 0 |
| 14 | 1 FR | 2020-15 | 5 FR-Corse    | 3 | 4 | 0        |          | 0 |
| 15 | 1 FR | 2020-15 | 5 FR-Corse    | 3 | 5 | 0        |          | 0 |
| 16 | 1 FR | 2020-15 | 5 FR-Ile de F | 1 | 1 | #####    | #####    |   |
| 17 | 1 FR | 2020-15 | 5 FR-Ile de F | 1 | 2 | #####    | #####    |   |
| 18 | 1 FR | 2020-15 | 5 FR-Ile de F | 1 | 3 | #####    | #####    |   |
| 19 | 1 FR | 2020-15 | 5 FR-Ile de F | 1 | 4 | 1.162859 | #####    |   |
| 20 | 1 FR | 2020-15 | 5 FR-Ile de F | 1 | 5 | #####    | #####    |   |
| 21 | 1 FR | 2020-15 | 5 FR-Ile de F | 2 | 1 | #####    | #####    |   |
| 22 | 1 FR | 2020-15 | 5 FR-Ile de F | 2 | 2 | 0.75     | #####    |   |
| 23 | 1 FR | 2020-15 | 5 FR-Ile de F | 2 | 3 | #####    | #####    |   |
| 24 | 1 FR | 2020-15 | 5 FR-Ile de F | 2 | 4 | 1.236842 | #####    |   |
| 25 | 1 FR | 2020-15 | 5 FR-Ile de F | 2 | 5 | #####    | #####    |   |
| 26 | 1 FR | 2020-15 | 5 FR-Ile de F | 3 | 1 | #####    | #####    |   |
| 27 | 1 FR | 2020-15 | 5 FR-Ile de F | 3 | 2 | #####    | #####    |   |
| 28 | 1 FR | 2020-15 | 5 FR-Ile de F | 3 | 3 | #####    | #####    |   |
| 29 | 1 FR | 2020-15 | 5 FR-Ile de F | 3 | 4 | 1.066667 | #####    |   |
| 30 | 1 FR | 2020-15 | 5 FR-Ile de F | 3 | 5 | 2.4      | 1.088229 |   |
| 31 | 1 FR | 2020-15 | 5 FR-North E  | 1 | 1 | #####    | #####    |   |
| 32 | 1 FR | 2020-15 | 5 FR-North E  | 1 | 2 | 1.000358 | #####    |   |
| 33 | 1 FR | 2020-15 | 5 FR-North E  | 1 | 3 | #####    | #####    |   |
| 34 | 1 FR | 2020-15 | 5 FR-North E  | 1 | 4 | #####    | #####    |   |
| 35 | 1 FR | 2020-15 | 5 FR-North E  | 1 | 5 | #####    | #####    |   |
| 36 | 1 FR | 2020-15 | 5 FR-North E  | 1 | 1 | #####    | #####    |   |
| 37 | 1 FR | 2020-15 | 5 FR-North E  | 2 | 1 | #####    | #####    |   |
| 38 | 1 FR | 2020-15 | 5 FR-North E  | 2 | 2 | 1.266667 | #####    |   |
| 39 | 1 FR | 2020-15 | 5 FR-North E  | 2 | 3 | #####    | #####    |   |
| 40 | 1 FR | 2020-15 | 5 FR-North E  | 2 | 4 | #####    | #####    |   |
| 41 | 1 FR | 2020-15 | 5 FR-North E  | 2 | 5 | 1.068966 | #####    |   |
| 42 | 1 FR | 2020-15 | 5 FR-North E  | 3 | 1 | #####    | #####    |   |
| 43 | 1 FR | 2020-15 | 5 FR-North E  | 3 | 2 | #####    | #####    |   |
| 44 | 1 FR | 2020-15 | 5 FR-North E  | 3 | 3 | #####    | #####    |   |
| 45 | 1 FR | 2020-15 | 5 FR-North E  | 3 | 4 | 1.636364 | #####    |   |
| 46 | 1 FR | 2020-15 | 5 FR-North E  | 3 | 5 | #####    | #####    |   |
| 47 | 1 FR | 2020-15 | 5 FR-Overall  | 1 | 1 | #####    | #####    |   |
| 48 | 1 FR | 2020-15 | 5 FR-Overall  | 1 | 2 | #####    | #####    |   |
| 49 | 1 FR | 2020-15 | 5 FR-Overall  | 1 | 3 | #####    | #####    |   |
| 50 | 1 FR | 2020-15 | 5 FR-Overall  | 1 | 4 | 1.326271 | #####    |   |
| 51 | 1 FR | 2020-15 | 5 FR-Overall  | 1 | 5 | #####    | #####    |   |
| 52 | 1 FR | 2020-15 | 5 FR-Overall  | 2 | 1 | #####    | #####    |   |
| 53 | 1 FR | 2020-15 | 5 FR-Overall  | 2 | 2 | 1.037453 | #####    |   |
| 54 | 1 FR | 2020-15 | 5 FR-Overall  | 2 | 3 | #####    | #####    |   |
| 55 | 1 FR | 2020-15 | 5 FR-Overall  | 2 | 4 | 1.196668 | #####    |   |
| 56 | 1 FR | 2020-15 | 5 FR-Overall  | 2 | 5 | #####    | #####    |   |
| 57 | 1 FR | 2020-15 | 5 FR-Overall  | 3 | 1 | #####    | #####    |   |
| 58 | 1 FR | 2020-15 | 5 FR-Overall  | 3 | 2 | #####    | #####    |   |
| 59 | 1 FR | 2020-15 | 5 FR-Overall  | 3 | 3 | #####    | #####    |   |
| 60 | 1 FR | 2020-15 | 5 FR-Overall  | 3 | 3 | #####    | #####    |   |

|    |      |         |              |   |   |          |          |  |
|----|------|---------|--------------|---|---|----------|----------|--|
| 1  |      |         |              |   |   |          |          |  |
| 2  |      |         |              |   |   |          |          |  |
| 3  | 1 FR | 2020-15 | 5 FR-Overall | 3 | 4 | 1.475398 | #####    |  |
| 4  | 1 FR | 2020-15 | 5 FR-Overall | 3 | 5 | 1.088243 | #####    |  |
| 5  | 1 FR | 2020-15 | 5 FR-South E | 1 | 1 | 1.046769 | #####    |  |
| 6  | 1 FR | 2020-15 | 5 FR-South E | 1 | 2 | #####    | #####    |  |
| 7  | 1 FR | 2020-15 | 5 FR-South E | 1 | 3 | #####    | #####    |  |
| 8  | 1 FR | 2020-15 | 5 FR-South E | 1 | 4 | 1.594173 | #####    |  |
| 9  | 1 FR | 2020-15 | 5 FR-South E | 1 | 5 | #####    | #####    |  |
| 10 | 1 FR | 2020-15 | 5 FR-South E | 2 | 1 | 1.229468 | #####    |  |
| 11 | 1 FR | 2020-15 | 5 FR-South E | 2 | 2 | 1.589744 | #####    |  |
| 12 | 1 FR | 2020-15 | 5 FR-South E | 2 | 3 | #####    | #####    |  |
| 13 | 1 FR | 2020-15 | 5 FR-South E | 2 | 4 | 2.1375   | #####    |  |
| 14 | 1 FR | 2020-15 | 5 FR-South E | 2 | 5 | 0.5      | #####    |  |
| 15 | 1 FR | 2020-15 | 5 FR-South E | 3 | 1 | #####    | #####    |  |
| 16 | 1 FR | 2020-15 | 5 FR-South E | 3 | 2 | #####    | #####    |  |
| 17 | 1 FR | 2020-15 | 5 FR-South E | 3 | 3 | #####    | #####    |  |
| 18 | 1 FR | 2020-15 | 5 FR-South E | 3 | 4 | #####    | #####    |  |
| 19 | 1 FR | 2020-15 | 5 FR-South E | 3 | 5 | 1.125    | #####    |  |
| 20 | 1 FR | 2020-15 | 5 FR-South V | 1 | 1 | #####    | #####    |  |
| 21 | 1 FR | 2020-15 | 5 FR-South V | 1 | 2 | #####    | #####    |  |
| 22 | 1 FR | 2020-15 | 5 FR-South V | 1 | 3 | #####    | #####    |  |
| 23 | 1 FR | 2020-15 | 5 FR-South V | 1 | 4 | 1.417602 | #####    |  |
| 24 | 1 FR | 2020-15 | 5 FR-South V | 1 | 5 | #####    | #####    |  |
| 25 | 1 FR | 2020-15 | 5 FR-South V | 2 | 1 | #####    | #####    |  |
| 26 | 1 FR | 2020-15 | 5 FR-South V | 2 | 2 | #####    | #####    |  |
| 27 | 1 FR | 2020-15 | 5 FR-South V | 2 | 3 | #####    | #####    |  |
| 28 | 1 FR | 2020-15 | 5 FR-South V | 2 | 4 | 1.04918  | #####    |  |
| 29 | 1 FR | 2020-15 | 5 FR-South V | 2 | 5 | 0.28     | #####    |  |
| 30 | 1 FR | 2020-15 | 5 FR-South V | 3 | 1 | #####    | #####    |  |
| 31 | 1 FR | 2020-15 | 5 FR-South V | 3 | 2 | #####    | #####    |  |
| 32 | 1 FR | 2020-15 | 5 FR-South V | 3 | 3 | 0.375    | #####    |  |
| 33 | 1 FR | 2020-15 | 5 FR-South V | 3 | 4 | 1.722222 | #####    |  |
| 34 | 1 FR | 2020-15 | 5 FR-South V | 3 | 5 | #####    | #####    |  |
| 35 | 1 FR | 2020-15 | 5 FR-South V | 3 | 5 | #####    | #####    |  |
| 36 | 1 FR | 2020-15 | 5 FR-West    | 1 | 1 | #####    | #####    |  |
| 37 | 1 FR | 2020-15 | 5 FR-West    | 1 | 2 | 1.173755 | #####    |  |
| 38 | 1 FR | 2020-15 | 5 FR-West    | 1 | 3 | #####    | #####    |  |
| 39 | 1 FR | 2020-15 | 5 FR-West    | 1 | 4 | 1.4257   | #####    |  |
| 40 | 1 FR | 2020-15 | 5 FR-West    | 1 | 5 | #####    | #####    |  |
| 41 | 1 FR | 2020-15 | 5 FR-West    | 2 | 1 | #####    | #####    |  |
| 42 | 1 FR | 2020-15 | 5 FR-West    | 2 | 2 | #####    | #####    |  |
| 43 | 1 FR | 2020-15 | 5 FR-West    | 2 | 3 | #####    | #####    |  |
| 44 | 1 FR | 2020-15 | 5 FR-West    | 2 | 4 | #####    | #####    |  |
| 45 | 1 FR | 2020-15 | 5 FR-West    | 2 | 5 | 0.46875  | #####    |  |
| 46 | 1 FR | 2020-15 | 5 FR-West    | 3 | 1 | 1.229593 | #####    |  |
| 47 | 1 FR | 2020-15 | 5 FR-West    | 3 | 2 | 1.666667 | 1.281335 |  |
| 48 | 1 FR | 2020-15 | 5 FR-West    | 3 | 3 | #####    | #####    |  |
| 49 | 1 FR | 2020-15 | 5 FR-West    | 3 | 4 | 1.931034 | #####    |  |
| 50 | 1 FR | 2020-15 | 5 FR-West    | 3 | 5 | 1.777778 | #####    |  |
| 51 | 1 IT | 2020-11 | 1 IT-Central | 1 | 1 | 4.327197 | #####    |  |
| 52 | 1 IT | 2020-11 | 1 IT-Central | 1 | 2 | 4.331017 | #####    |  |
| 53 | 1 IT | 2020-11 | 1 IT-Central | 1 | 3 | 5.073982 | #####    |  |
| 54 | 1 IT | 2020-11 | 1 IT-Central | 1 | 4 | 4.956768 | #####    |  |
| 55 | 1 IT | 2020-11 | 1 IT-Central | 1 | 5 | 2.509791 | #####    |  |
| 56 | 1 IT | 2020-11 | 1 IT-Central | 2 | 1 | 3.451995 | #####    |  |
| 57 | 1 IT | 2020-11 | 1 IT-Central | 2 | 2 | 3.536585 | #####    |  |
| 58 | 1 IT | 2020-11 | 1 IT-Central | 2 | 3 | 4.044643 | #####    |  |
| 59 | 1 IT | 2020-11 | 1 IT-Central | 2 | 4 | 3.697368 | #####    |  |
| 60 | 1 IT | 2020-11 | 1 IT-Central | 2 | 4 | 3.697368 | #####    |  |

1  
2  
3  
4  
5  
6  
7  
8  
9  
10  
11  
12  
13  
14  
15  
16  
17  
18  
19  
20  
21  
22  
23  
24  
25  
26  
27  
28  
29  
30  
31  
32  
33  
34  
35  
36  
37  
38  
39  
40  
41  
42  
43  
44  
45  
46  
47  
48  
49  
50  
51  
52  
53  
54  
55  
56  
57  
58  
59  
60

|      |         |                |   |   |          |          |
|------|---------|----------------|---|---|----------|----------|
| 1 IT | 2020-11 | 1 IT-Central   | 2 | 5 | 2.5      | #####    |
| 1 IT | 2020-11 | 1 IT-Central   | 3 | 1 | 4.960482 | #####    |
| 1 IT | 2020-11 | 1 IT-Central   | 3 | 2 | 5        | #####    |
| 1 IT | 2020-11 | 1 IT-Central   | 3 | 3 | 5.705128 | #####    |
| 1 IT | 2020-11 | 1 IT-Central   | 3 | 4 | 5.794118 | #####    |
| 1 IT | 2020-11 | 1 IT-Central   | 3 | 5 | 2.518519 | #####    |
| 1 IT | 2020-11 | 1 IT-Insular   | 1 | 1 | 4.058532 | #####    |
| 1 IT | 2020-11 | 1 IT-Insular   | 1 | 2 | 4.513099 | #####    |
| 1 IT | 2020-11 | 1 IT-Insular   | 1 | 3 | 3.71863  | #####    |
| 1 IT | 2020-11 | 1 IT-Insular   | 1 | 4 | 5.005579 | #####    |
| 1 IT | 2020-11 | 1 IT-Insular   | 1 | 5 | 2.992163 | #####    |
| 1 IT | 2020-11 | 1 IT-Insular   | 2 | 1 | 3.07904  | #####    |
| 1 IT | 2020-11 | 1 IT-Insular   | 2 | 2 | 3.6      | #####    |
| 1 IT | 2020-11 | 1 IT-Insular   | 2 | 3 | 2.605634 | #####    |
| 1 IT | 2020-11 | 1 IT-Insular   | 2 | 4 | 4.62     | #####    |
| 1 IT | 2020-11 | 1 IT-Insular   | 2 | 5 | 1.625    | #####    |
| 1 IT | 2020-11 | 1 IT-Insular   | 3 | 1 | 4.773172 | #####    |
| 1 IT | 2020-11 | 1 IT-Insular   | 3 | 2 | 5        | 1.199152 |
| 1 IT | 2020-11 | 1 IT-Insular   | 3 | 3 | 4.488372 | #####    |
| 1 IT | 2020-11 | 1 IT-Insular   | 3 | 4 | 5.290323 | #####    |
| 1 IT | 2020-11 | 1 IT-Insular   | 3 | 5 | 4.25     | 1.291751 |
| 1 IT | 2020-11 | 1 IT-Northeast | 1 | 1 | 4.541288 | #####    |
| 1 IT | 2020-11 | 1 IT-Northeast | 1 | 2 | 4.596341 | #####    |
| 1 IT | 2020-11 | 1 IT-Northeast | 1 | 3 | 5.515217 | #####    |
| 1 IT | 2020-11 | 1 IT-Northeast | 1 | 4 | 5.17148  | #####    |
| 1 IT | 2020-11 | 1 IT-Northeast | 1 | 5 | 2.400289 | #####    |
| 1 IT | 2020-11 | 1 IT-Northeast | 2 | 1 | 3.633288 | #####    |
| 1 IT | 2020-11 | 1 IT-Northeast | 2 | 2 | 4.611765 | #####    |
| 1 IT | 2020-11 | 1 IT-Northeast | 2 | 3 | 3.846154 | #####    |
| 1 IT | 2020-11 | 1 IT-Northeast | 2 | 4 | 4.169231 | #####    |
| 1 IT | 2020-11 | 1 IT-Northeast | 2 | 5 | 2.393939 | #####    |
| 1 IT | 2020-11 | 1 IT-Northeast | 3 | 1 | 5.206166 | #####    |
| 1 IT | 2020-11 | 1 IT-Northeast | 3 | 2 | 4.585366 | #####    |
| 1 IT | 2020-11 | 1 IT-Northeast | 3 | 3 | 6.659574 | #####    |
| 1 IT | 2020-11 | 1 IT-Northeast | 3 | 4 | 5.742857 | #####    |
| 1 IT | 2020-11 | 1 IT-Northeast | 3 | 5 | 2.407407 | #####    |
| 1 IT | 2020-11 | 1 IT-Northwest | 1 | 1 | 4.191095 | #####    |
| 1 IT | 2020-11 | 1 IT-Northwest | 1 | 2 | 4.179089 | #####    |
| 1 IT | 2020-11 | 1 IT-Northwest | 1 | 3 | 4.907889 | #####    |
| 1 IT | 2020-11 | 1 IT-Northwest | 1 | 4 | 5.053993 | #####    |
| 1 IT | 2020-11 | 1 IT-Northwest | 1 | 5 | 2.173816 | #####    |
| 1 IT | 2020-11 | 1 IT-Northwest | 2 | 1 | 3.337256 | #####    |
| 1 IT | 2020-11 | 1 IT-Northwest | 2 | 2 | 3.544444 | #####    |
| 1 IT | 2020-11 | 1 IT-Northwest | 2 | 3 | 4.216    | #####    |
| 1 IT | 2020-11 | 1 IT-Northwest | 2 | 4 | 4.557895 | #####    |
| 1 IT | 2020-11 | 1 IT-Northwest | 2 | 5 | 1.425532 | #####    |
| 1 IT | 2020-11 | 1 IT-Northwest | 3 | 1 | 4.849829 | #####    |
| 1 IT | 2020-11 | 1 IT-Northwest | 3 | 2 | 4.615385 | #####    |
| 1 IT | 2020-11 | 1 IT-Northwest | 3 | 3 | 5.27     | #####    |
| 1 IT | 2020-11 | 1 IT-Northwest | 3 | 4 | 5.4125   | #####    |
| 1 IT | 2020-11 | 1 IT-Northwest | 3 | 5 | 3.225806 | #####    |
| 1 IT | 2020-11 | 1 IT-Overall   | 1 | 1 | 4.241109 | #####    |
| 1 IT | 2020-11 | 1 IT-Overall   | 1 | 2 | 4.32605  | #####    |
| 1 IT | 2020-11 | 1 IT-Overall   | 1 | 3 | 4.77953  | #####    |
| 1 IT | 2020-11 | 1 IT-Overall   | 1 | 4 | 4.882537 | #####    |
| 1 IT | 2020-11 | 1 IT-Overall   | 1 | 5 | 2.561485 | #####    |



|    |      |         |                |   |   |          |       |  |
|----|------|---------|----------------|---|---|----------|-------|--|
| 1  |      |         |                |   |   |          |       |  |
| 2  |      |         |                |   |   |          |       |  |
| 3  | 1 IT | 2020-11 | 1 IT-Overall   | 2 | 1 | 3.364181 | ##### |  |
| 4  | 1 IT | 2020-11 | 1 IT-Overall   | 2 | 2 | 3.874357 | ##### |  |
| 5  | 1 IT | 2020-11 | 1 IT-Overall   | 2 | 3 | 3.641551 | ##### |  |
| 6  | 1 IT | 2020-11 | 1 IT-Overall   | 2 | 4 | 4.151859 | ##### |  |
| 7  | 1 IT | 2020-11 | 1 IT-Overall   | 2 | 5 | 1.930984 | ##### |  |
| 8  | 1 IT | 2020-11 | 1 IT-Overall   | 3 | 1 | 4.843775 | ##### |  |
| 9  | 1 IT | 2020-11 | 1 IT-Overall   | 3 | 2 | 4.610307 | ##### |  |
| 10 | 1 IT | 2020-11 | 1 IT-Overall   | 3 | 3 | 5.460827 | ##### |  |
| 11 | 1 IT | 2020-11 | 1 IT-Overall   | 3 | 4 | 5.334468 | ##### |  |
| 12 | 1 IT | 2020-11 | 1 IT-Overall   | 3 | 5 | 3.195367 | ##### |  |
| 13 | 1 IT | 2020-11 | 1 IT-South     | 1 | 1 | 4.14283  | ##### |  |
| 14 | 1 IT | 2020-11 | 1 IT-South     | 1 | 2 | 4.187102 | ##### |  |
| 15 | 1 IT | 2020-11 | 1 IT-South     | 1 | 3 | 4.587206 | ##### |  |
| 16 | 1 IT | 2020-11 | 1 IT-South     | 1 | 4 | 4.496521 | ##### |  |
| 17 | 1 IT | 2020-11 | 1 IT-South     | 1 | 5 | 2.767209 | ##### |  |
| 18 | 1 IT | 2020-11 | 1 IT-South     | 2 | 1 | 3.318312 | ##### |  |
| 19 | 1 IT | 2020-11 | 1 IT-South     | 2 | 2 | 4.15     | ##### |  |
| 20 | 1 IT | 2020-11 | 1 IT-South     | 2 | 3 | 3.40625  | ##### |  |
| 21 | 1 IT | 2020-11 | 1 IT-South     | 2 | 4 | 3.836735 | ##### |  |
| 22 | 1 IT | 2020-11 | 1 IT-South     | 2 | 5 | 1.888889 | ##### |  |
| 23 | 1 IT | 2020-11 | 1 IT-South     | 3 | 1 | 4.60338  | ##### |  |
| 24 | 1 IT | 2020-11 | 1 IT-South     | 3 | 2 | 4.205128 | ##### |  |
| 25 | 1 IT | 2020-11 | 1 IT-South     | 3 | 3 | 5.234043 | ##### |  |
| 26 | 1 IT | 2020-11 | 1 IT-South     | 3 | 4 | 4.825    | ##### |  |
| 27 | 1 IT | 2020-11 | 1 IT-South     | 3 | 5 | 3.470588 | ##### |  |
| 28 | 1 IT | 2020-11 | 2 IT-Central   | 1 | 1 | 1.990687 | ##### |  |
| 29 | 1 IT | 2020-11 | 2 IT-Central   | 1 | 2 | 2.899512 | ##### |  |
| 30 | 1 IT | 2020-11 | 2 IT-Central   | 1 | 3 | 1.989212 | ##### |  |
| 31 | 1 IT | 2020-11 | 2 IT-Central   | 1 | 4 | 2.047051 | ##### |  |
| 32 | 1 IT | 2020-11 | 2 IT-Central   | 1 | 5 | 1.25126  | ##### |  |
| 33 | 1 IT | 2020-11 | 2 IT-Central   | 2 | 1 | 1.770066 | ##### |  |
| 34 | 1 IT | 2020-11 | 2 IT-Central   | 2 | 2 | 2.536585 | ##### |  |
| 35 | 1 IT | 2020-11 | 2 IT-Central   | 2 | 3 | 1.743363 | ##### |  |
| 36 | 1 IT | 2020-11 | 2 IT-Central   | 2 | 4 | 1.886076 | ##### |  |
| 37 | 1 IT | 2020-11 | 2 IT-Central   | 2 | 5 | 1.117647 | ##### |  |
| 38 | 1 IT | 2020-11 | 2 IT-Central   | 3 | 1 | 2.147578 | ##### |  |
| 39 | 1 IT | 2020-11 | 2 IT-Central   | 3 | 2 | 3.205128 | ##### |  |
| 40 | 1 IT | 2020-11 | 2 IT-Central   | 3 | 3 | 2.1375   | ##### |  |
| 41 | 1 IT | 2020-11 | 2 IT-Central   | 3 | 4 | 2.150685 | ##### |  |
| 42 | 1 IT | 2020-11 | 2 IT-Central   | 3 | 5 | 1.37037  | ##### |  |
| 43 | 1 IT | 2020-11 | 2 IT-Insular   | 1 | 1 | 2.193366 | ##### |  |
| 44 | 1 IT | 2020-11 | 2 IT-Insular   | 1 | 2 | 2.886047 | ##### |  |
| 45 | 1 IT | 2020-11 | 2 IT-Insular   | 1 | 3 | 2.033089 | ##### |  |
| 46 | 1 IT | 2020-11 | 2 IT-Insular   | 1 | 4 | 2.422968 | ##### |  |
| 47 | 1 IT | 2020-11 | 2 IT-Insular   | 1 | 5 | 1.644089 | ##### |  |
| 48 | 1 IT | 2020-11 | 2 IT-Insular   | 2 | 1 | 1.823597 | ##### |  |
| 49 | 1 IT | 2020-11 | 2 IT-Insular   | 2 | 2 | 2.977778 | ##### |  |
| 50 | 1 IT | 2020-11 | 2 IT-Insular   | 2 | 3 | 1.916667 | ##### |  |
| 51 | 1 IT | 2020-11 | 2 IT-Insular   | 2 | 4 | 1.86     | ##### |  |
| 52 | 1 IT | 2020-11 | 2 IT-Insular   | 2 | 5 | 1.166667 | ##### |  |
| 53 | 1 IT | 2020-11 | 2 IT-Insular   | 3 | 1 | 2.45908  | ##### |  |
| 54 | 1 IT | 2020-11 | 2 IT-Insular   | 3 | 2 | 2.83871  | ##### |  |
| 55 | 1 IT | 2020-11 | 2 IT-Insular   | 3 | 3 | 2.111111 | ##### |  |
| 56 | 1 IT | 2020-11 | 2 IT-Insular   | 3 | 4 | 2.83871  | ##### |  |
| 57 | 1 IT | 2020-11 | 2 IT-Insular   | 3 | 5 | 2.083333 | ##### |  |
| 58 | 1 IT | 2020-11 | 2 IT-Northeast | 1 | 1 | 1.798205 | ##### |  |
| 59 | 1 IT | 2020-11 | 2 IT-Northeast | 1 | 1 | 1.798205 | ##### |  |
| 60 | 1 IT | 2020-11 | 2 IT-Northeast | 1 | 1 | 1.798205 | ##### |  |

|    |      |         |                |   |   |          |       |
|----|------|---------|----------------|---|---|----------|-------|
| 1  |      |         |                |   |   |          |       |
| 2  |      |         |                |   |   |          |       |
| 3  | 1 IT | 2020-11 | 2 IT-Northeast | 1 | 2 | 2.89568  | ##### |
| 4  | 1 IT | 2020-11 | 2 IT-Northeast | 1 | 3 | 1.895374 | ##### |
| 5  | 1 IT | 2020-11 | 2 IT-Northeast | 1 | 4 | 1.679026 | ##### |
| 6  | 1 IT | 2020-11 | 2 IT-Northeast | 1 | 5 | 1.047223 | ##### |
| 7  | 1 IT | 2020-11 | 2 IT-Northeast | 2 | 1 | 1.719502 | ##### |
| 8  | 1 IT | 2020-11 | 2 IT-Northeast | 2 | 2 | 2.604651 | ##### |
| 9  | 1 IT | 2020-11 | 2 IT-Northeast | 2 | 3 | 1.836066 | ##### |
| 10 | 1 IT | 2020-11 | 2 IT-Northeast | 2 | 4 | 1.742424 | ##### |
| 11 | 1 IT | 2020-11 | 2 IT-Northeast | 2 | 5 | 1.090909 | ##### |
| 12 | 1 IT | 2020-11 | 2 IT-Northeast | 3 | 1 | 1.85308  | ##### |
| 13 | 1 IT | 2020-11 | 2 IT-Northeast | 3 | 2 | 3.090909 | ##### |
| 14 | 1 IT | 2020-11 | 2 IT-Northeast | 3 | 3 | 1.933333 | ##### |
| 15 | 1 IT | 2020-11 | 2 IT-Northeast | 3 | 4 | 1.643836 | ##### |
| 16 | 1 IT | 2020-11 | 2 IT-Northeast | 3 | 5 | 1        | ##### |
| 17 | 1 IT | 2020-11 | 2 IT-Northeast | 1 | 1 | 1.769543 | ##### |
| 18 | 1 IT | 2020-11 | 2 IT-Northeast | 1 | 2 | 2.813055 | ##### |
| 19 | 1 IT | 2020-11 | 2 IT-Northeast | 1 | 3 | 1.723546 | ##### |
| 20 | 1 IT | 2020-11 | 2 IT-Northeast | 1 | 4 | 1.843358 | ##### |
| 21 | 1 IT | 2020-11 | 2 IT-Northeast | 1 | 5 | #####    | ##### |
| 22 | 1 IT | 2020-11 | 2 IT-Northeast | 2 | 1 | 1.576891 | ##### |
| 23 | 1 IT | 2020-11 | 2 IT-Northeast | 2 | 2 | 2.574468 | ##### |
| 24 | 1 IT | 2020-11 | 2 IT-Northeast | 2 | 3 | 1.80916  | ##### |
| 25 | 1 IT | 2020-11 | 2 IT-Northeast | 2 | 4 | 1.736842 | ##### |
| 26 | 1 IT | 2020-11 | 2 IT-Northeast | 2 | 5 | #####    | ##### |
| 27 | 1 IT | 2020-11 | 2 IT-Northeast | 3 | 1 | 1.915032 | ##### |
| 28 | 1 IT | 2020-11 | 2 IT-Northeast | 3 | 2 | 2.981132 | ##### |
| 29 | 1 IT | 2020-11 | 2 IT-Northeast | 3 | 3 | 1.679245 | ##### |
| 30 | 1 IT | 2020-11 | 2 IT-Northeast | 3 | 4 | 1.916667 | ##### |
| 31 | 1 IT | 2020-11 | 2 IT-Northeast | 3 | 5 | 1.290323 | ##### |
| 32 | 1 IT | 2020-11 | 2 IT-Overall   | 1 | 1 | 1.976242 | ##### |
| 33 | 1 IT | 2020-11 | 2 IT-Overall   | 1 | 2 | 2.934664 | ##### |
| 34 | 1 IT | 2020-11 | 2 IT-Overall   | 1 | 3 | 1.950018 | ##### |
| 35 | 1 IT | 2020-11 | 2 IT-Overall   | 1 | 4 | 1.971024 | ##### |
| 36 | 1 IT | 2020-11 | 2 IT-Overall   | 1 | 5 | 1.288111 | ##### |
| 37 | 1 IT | 2020-11 | 2 IT-Overall   | 2 | 1 | 1.794334 | ##### |
| 38 | 1 IT | 2020-11 | 2 IT-Overall   | 2 | 2 | 2.72217  | ##### |
| 39 | 1 IT | 2020-11 | 2 IT-Overall   | 2 | 3 | 1.881119 | ##### |
| 40 | 1 IT | 2020-11 | 2 IT-Overall   | 2 | 4 | 1.912068 | ##### |
| 41 | 1 IT | 2020-11 | 2 IT-Overall   | 2 | 5 | 1.034591 | ##### |
| 42 | 1 IT | 2020-11 | 2 IT-Overall   | 3 | 1 | 2.098728 | ##### |
| 43 | 1 IT | 2020-11 | 2 IT-Overall   | 3 | 2 | 3.067311 | ##### |
| 44 | 1 IT | 2020-11 | 2 IT-Overall   | 3 | 3 | 1.990305 | ##### |
| 45 | 1 IT | 2020-11 | 2 IT-Overall   | 3 | 4 | 2.006497 | ##### |
| 46 | 1 IT | 2020-11 | 2 IT-Overall   | 3 | 5 | 1.541516 | ##### |
| 47 | 1 IT | 2020-11 | 2 IT-South     | 1 | 1 | 2.113326 | ##### |
| 48 | 1 IT | 2020-11 | 2 IT-South     | 1 | 2 | 3.095365 | ##### |
| 49 | 1 IT | 2020-11 | 2 IT-South     | 1 | 3 | 2.089135 | ##### |
| 50 | 1 IT | 2020-11 | 2 IT-South     | 1 | 4 | 1.942059 | ##### |
| 51 | 1 IT | 2020-11 | 2 IT-South     | 1 | 5 | 1.531424 | ##### |
| 52 | 1 IT | 2020-11 | 2 IT-South     | 2 | 1 | 2.058026 | ##### |
| 53 | 1 IT | 2020-11 | 2 IT-South     | 2 | 2 | 2.975    | ##### |
| 54 | 1 IT | 2020-11 | 2 IT-South     | 2 | 3 | 2.061538 | ##### |
| 55 | 1 IT | 2020-11 | 2 IT-South     | 2 | 4 | 2.22449  | ##### |
| 56 | 1 IT | 2020-11 | 2 IT-South     | 2 | 5 | 1.166667 | ##### |
| 57 | 1 IT | 2020-11 | 2 IT-South     | 3 | 1 | 2.143883 | ##### |
| 58 | 1 IT | 2020-11 | 2 IT-South     | 3 | 2 | 3.153846 | ##### |
| 59 | 1 IT | 2020-11 | 2 IT-South     | 3 |   |          |       |
| 60 | 1 IT | 2020-11 | 2 IT-South     | 3 |   |          |       |

|    |      |         |                |   |   |          |       |  |
|----|------|---------|----------------|---|---|----------|-------|--|
| 1  |      |         |                |   |   |          |       |  |
| 2  |      |         |                |   |   |          |       |  |
| 3  | 1 IT | 2020-11 | 2 IT-South     | 3 | 3 | 2.104167 | ##### |  |
| 4  | 1 IT | 2020-11 | 2 IT-South     | 3 | 4 | 1.804878 | ##### |  |
| 5  | 1 IT | 2020-11 | 2 IT-South     | 3 | 5 | 1.823529 | ##### |  |
| 6  | 1 IT | 2020-11 | 3 IT-Central   | 1 | 1 | #####    | ##### |  |
| 7  | 1 IT | 2020-11 | 3 IT-Central   | 1 | 2 | #####    | ##### |  |
| 8  | 1 IT | 2020-11 | 3 IT-Central   | 1 | 3 | #####    | ##### |  |
| 9  | 1 IT | 2020-11 | 3 IT-Central   | 1 | 4 | 0        | 0     |  |
| 10 | 1 IT | 2020-11 | 3 IT-Central   | 1 | 5 | 0        | 0     |  |
| 11 | 1 IT | 2020-11 | 3 IT-Central   | 2 | 1 | #####    | ##### |  |
| 12 | 1 IT | 2020-11 | 3 IT-Central   | 2 | 2 | #####    | ##### |  |
| 13 | 1 IT | 2020-11 | 3 IT-Central   | 2 | 3 | 0        | 0     |  |
| 14 | 1 IT | 2020-11 | 3 IT-Central   | 2 | 4 | 0        | 0     |  |
| 15 | 1 IT | 2020-11 | 3 IT-Central   | 2 | 5 | 0        | 0     |  |
| 16 | 1 IT | 2020-11 | 3 IT-Central   | 3 | 1 | #####    | ##### |  |
| 17 | 1 IT | 2020-11 | 3 IT-Central   | 3 | 2 | 0        | 0     |  |
| 18 | 1 IT | 2020-11 | 3 IT-Central   | 3 | 3 | 0.125    | ##### |  |
| 19 | 1 IT | 2020-11 | 3 IT-Central   | 3 | 4 | 0        | 0     |  |
| 20 | 1 IT | 2020-11 | 3 IT-Central   | 3 | 5 | 0        | 0     |  |
| 21 | 1 IT | 2020-11 | 3 IT-Central   | 3 | 5 | 0        | 0     |  |
| 22 | 1 IT | 2020-11 | 3 IT-Insular   | 1 | 1 | #####    | ##### |  |
| 23 | 1 IT | 2020-11 | 3 IT-Insular   | 1 | 2 | 0        | 0     |  |
| 24 | 1 IT | 2020-11 | 3 IT-Insular   | 1 | 3 | 0        | 0     |  |
| 25 | 1 IT | 2020-11 | 3 IT-Insular   | 1 | 4 | 0        | 0     |  |
| 26 | 1 IT | 2020-11 | 3 IT-Insular   | 1 | 5 | #####    | ##### |  |
| 27 | 1 IT | 2020-11 | 3 IT-Insular   | 2 | 1 | 0        | 0     |  |
| 28 | 1 IT | 2020-11 | 3 IT-Insular   | 2 | 2 | 0        | 0     |  |
| 29 | 1 IT | 2020-11 | 3 IT-Insular   | 2 | 3 | 0        | 0     |  |
| 30 | 1 IT | 2020-11 | 3 IT-Insular   | 2 | 4 | 0        | 0     |  |
| 31 | 1 IT | 2020-11 | 3 IT-Insular   | 2 | 5 | 0        | 0     |  |
| 32 | 1 IT | 2020-11 | 3 IT-Insular   | 3 | 1 | #####    | ##### |  |
| 33 | 1 IT | 2020-11 | 3 IT-Insular   | 3 | 2 | 0        | 0     |  |
| 34 | 1 IT | 2020-11 | 3 IT-Insular   | 3 | 3 | 0        | 0     |  |
| 35 | 1 IT | 2020-11 | 3 IT-Insular   | 3 | 4 | 0        | 0     |  |
| 36 | 1 IT | 2020-11 | 3 IT-Insular   | 3 | 5 | #####    | ##### |  |
| 37 | 1 IT | 2020-11 | 3 IT-Northeast | 1 | 1 | #####    | ##### |  |
| 38 | 1 IT | 2020-11 | 3 IT-Northeast | 1 | 2 | 0        | 0     |  |
| 39 | 1 IT | 2020-11 | 3 IT-Northeast | 1 | 3 | 0        | 0     |  |
| 40 | 1 IT | 2020-11 | 3 IT-Northeast | 1 | 4 | #####    | ##### |  |
| 41 | 1 IT | 2020-11 | 3 IT-Northeast | 1 | 5 | #####    | ##### |  |
| 42 | 1 IT | 2020-11 | 3 IT-Northeast | 2 | 1 | #####    | ##### |  |
| 43 | 1 IT | 2020-11 | 3 IT-Northeast | 2 | 2 | 0        | 0     |  |
| 44 | 1 IT | 2020-11 | 3 IT-Northeast | 2 | 3 | 0        | 0     |  |
| 45 | 1 IT | 2020-11 | 3 IT-Northeast | 2 | 4 | #####    | ##### |  |
| 46 | 1 IT | 2020-11 | 3 IT-Northeast | 2 | 5 | #####    | ##### |  |
| 47 | 1 IT | 2020-11 | 3 IT-Northeast | 3 | 1 | 0        | 0     |  |
| 48 | 1 IT | 2020-11 | 3 IT-Northeast | 3 | 2 | 0        | 0     |  |
| 49 | 1 IT | 2020-11 | 3 IT-Northeast | 3 | 3 | 0        | 0     |  |
| 50 | 1 IT | 2020-11 | 3 IT-Northeast | 3 | 4 | 0        | 0     |  |
| 51 | 1 IT | 2020-11 | 3 IT-Northeast | 3 | 5 | 0        | 0     |  |
| 52 | 1 IT | 2020-11 | 3 IT-Northwest | 1 | 1 | #####    | ##### |  |
| 53 | 1 IT | 2020-11 | 3 IT-Northwest | 1 | 2 | 0        | 0     |  |
| 54 | 1 IT | 2020-11 | 3 IT-Northwest | 1 | 3 | #####    | ##### |  |
| 55 | 1 IT | 2020-11 | 3 IT-Northwest | 1 | 4 | #####    | ##### |  |
| 56 | 1 IT | 2020-11 | 3 IT-Northwest | 1 | 5 | #####    | ##### |  |
| 57 | 1 IT | 2020-11 | 3 IT-Northwest | 2 | 1 | #####    | ##### |  |
| 58 | 1 IT | 2020-11 | 3 IT-Northwest | 2 | 2 | 0        | 0     |  |
| 59 | 1 IT | 2020-11 | 3 IT-Northwest | 2 | 3 | #####    | ##### |  |
| 60 | 1 IT | 2020-11 | 3 IT-Northwest | 2 | 3 | #####    | ##### |  |

1  
2  
3  
4  
5  
6  
7  
8  
9  
10  
11  
12  
13  
14  
15  
16  
17  
18  
19  
20  
21  
22  
23  
24  
25  
26  
27  
28  
29  
30  
31  
32  
33  
34  
35  
36  
37  
38  
39  
40  
41  
42  
43  
44  
45  
46  
47  
48  
49  
50  
51  
52  
53  
54  
55  
56  
57  
58  
59  
60

|      |         |              |   |   |          |       |
|------|---------|--------------|---|---|----------|-------|
| 1 IT | 2020-11 | 3 IT-Northwe | 2 | 4 | #####    | ##### |
| 1 IT | 2020-11 | 3 IT-Northwe | 2 | 5 | #####    | ##### |
| 1 IT | 2020-11 | 3 IT-Northwe | 3 | 1 | #####    | ##### |
| 1 IT | 2020-11 | 3 IT-Northwe | 3 | 2 | 0        | 0     |
| 1 IT | 2020-11 | 3 IT-Northwe | 3 | 3 | 0        | 0     |
| 1 IT | 2020-11 | 3 IT-Northwe | 3 | 4 | #####    | ##### |
| 1 IT | 2020-11 | 3 IT-Northwe | 3 | 5 | 0        | 0     |
| 1 IT | 2020-11 | 3 IT-Overall | 1 | 1 | #####    | ##### |
| 1 IT | 2020-11 | 3 IT-Overall | 1 | 2 | #####    | ##### |
| 1 IT | 2020-11 | 3 IT-Overall | 1 | 3 | #####    | ##### |
| 1 IT | 2020-11 | 3 IT-Overall | 1 | 4 | #####    | ##### |
| 1 IT | 2020-11 | 3 IT-Overall | 1 | 5 | #####    | ##### |
| 1 IT | 2020-11 | 3 IT-Overall | 2 | 1 | #####    | ##### |
| 1 IT | 2020-11 | 3 IT-Overall | 2 | 2 | #####    | ##### |
| 1 IT | 2020-11 | 3 IT-Overall | 2 | 3 | #####    | ##### |
| 1 IT | 2020-11 | 3 IT-Overall | 2 | 4 | #####    | ##### |
| 1 IT | 2020-11 | 3 IT-Overall | 2 | 5 | #####    | ##### |
| 1 IT | 2020-11 | 3 IT-Overall | 3 | 1 | #####    | ##### |
| 1 IT | 2020-11 | 3 IT-Overall | 3 | 2 | 0        | 0     |
| 1 IT | 2020-11 | 3 IT-Overall | 3 | 3 | #####    | ##### |
| 1 IT | 2020-11 | 3 IT-Overall | 3 | 4 | #####    | ##### |
| 1 IT | 2020-11 | 3 IT-Overall | 3 | 5 | #####    | ##### |
| 1 IT | 2020-11 | 3 IT-South   | 1 | 1 | #####    | ##### |
| 1 IT | 2020-11 | 3 IT-South   | 1 | 2 | 0        | 0     |
| 1 IT | 2020-11 | 3 IT-South   | 1 | 3 | #####    | ##### |
| 1 IT | 2020-11 | 3 IT-South   | 1 | 4 | #####    | ##### |
| 1 IT | 2020-11 | 3 IT-South   | 1 | 5 | #####    | ##### |
| 1 IT | 2020-11 | 3 IT-South   | 2 | 1 | #####    | ##### |
| 1 IT | 2020-11 | 3 IT-South   | 2 | 2 | 0        | 0     |
| 1 IT | 2020-11 | 3 IT-South   | 2 | 3 | #####    | ##### |
| 1 IT | 2020-11 | 3 IT-South   | 2 | 4 | 0.04     | ##### |
| 1 IT | 2020-11 | 3 IT-South   | 2 | 5 | 0        | 0     |
| 1 IT | 2020-11 | 3 IT-South   | 3 | 1 | #####    | ##### |
| 1 IT | 2020-11 | 3 IT-South   | 3 | 2 | 0        | 0     |
| 1 IT | 2020-11 | 3 IT-South   | 3 | 3 | 0        | 0     |
| 1 IT | 2020-11 | 3 IT-South   | 3 | 4 | #####    | ##### |
| 1 IT | 2020-11 | 3 IT-South   | 3 | 5 | #####    | ##### |
| 1 IT | 2020-11 | 4 IT-Central | 1 | 1 | 1.284747 | ##### |
| 1 IT | 2020-11 | 4 IT-Central | 1 | 2 | #####    | ##### |
| 1 IT | 2020-11 | 4 IT-Central | 1 | 3 | 1.867348 | ##### |
| 1 IT | 2020-11 | 4 IT-Central | 1 | 4 | 1.633731 | ##### |
| 1 IT | 2020-11 | 4 IT-Central | 1 | 5 | #####    | ##### |
| 1 IT | 2020-11 | 4 IT-Central | 2 | 1 | #####    | ##### |
| 1 IT | 2020-11 | 4 IT-Central | 2 | 2 | #####    | ##### |
| 1 IT | 2020-11 | 4 IT-Central | 2 | 3 | 1.044643 | ##### |
| 1 IT | 2020-11 | 4 IT-Central | 2 | 4 | 1.052632 | ##### |
| 1 IT | 2020-11 | 4 IT-Central | 2 | 5 | #####    | ##### |
| 1 IT | 2020-11 | 4 IT-Central | 3 | 1 | 1.625218 | ##### |
| 1 IT | 2020-11 | 4 IT-Central | 3 | 2 | #####    | ##### |
| 1 IT | 2020-11 | 4 IT-Central | 3 | 3 | 2.371795 | ##### |
| 1 IT | 2020-11 | 4 IT-Central | 3 | 4 | 2.014493 | ##### |
| 1 IT | 2020-11 | 4 IT-Central | 3 | 5 | #####    | ##### |
| 1 IT | 2020-11 | 4 IT-Insular | 1 | 1 | #####    | ##### |
| 1 IT | 2020-11 | 4 IT-Insular | 1 | 2 | #####    | ##### |
| 1 IT | 2020-11 | 4 IT-Insular | 1 | 3 | #####    | ##### |
| 1 IT | 2020-11 | 4 IT-Insular | 1 | 4 | 1.600279 | ##### |

|    |      |         |                |   |   |          |       |
|----|------|---------|----------------|---|---|----------|-------|
| 1  |      |         |                |   |   |          |       |
| 2  |      |         |                |   |   |          |       |
| 3  | 1 IT | 2020-11 | 4 IT-Insular   | 1 | 5 | #####    | ##### |
| 4  | 1 IT | 2020-11 | 4 IT-Insular   | 2 | 1 | #####    | ##### |
| 5  | 1 IT | 2020-11 | 4 IT-Insular   | 2 | 2 | #####    | ##### |
| 6  | 1 IT | 2020-11 | 4 IT-Insular   | 2 | 3 | #####    | ##### |
| 7  | 1 IT | 2020-11 | 4 IT-Insular   | 2 | 4 | 2.02     | ##### |
| 8  | 1 IT | 2020-11 | 4 IT-Insular   | 2 | 5 | 0        | 0     |
| 9  | 1 IT | 2020-11 | 4 IT-Insular   | 3 | 1 | #####    | ##### |
| 10 | 1 IT | 2020-11 | 4 IT-Insular   | 3 | 2 | 1.066667 | ##### |
| 11 | 1 IT | 2020-11 | 4 IT-Insular   | 3 | 3 | 1.372093 | ##### |
| 12 | 1 IT | 2020-11 | 4 IT-Insular   | 3 | 4 | 1.290323 | ##### |
| 13 | 1 IT | 2020-11 | 4 IT-Insular   | 3 | 5 | #####    | ##### |
| 14 | 1 IT | 2020-11 | 4 IT-Northeast | 1 | 1 | 1.645036 | ##### |
| 15 | 1 IT | 2020-11 | 4 IT-Northeast | 1 | 2 | 1.079522 | ##### |
| 16 | 1 IT | 2020-11 | 4 IT-Northeast | 1 | 3 | 2.632368 | ##### |
| 17 | 1 IT | 2020-11 | 4 IT-Northeast | 1 | 4 | 2.20673  | ##### |
| 18 | 1 IT | 2020-11 | 4 IT-Northeast | 1 | 5 | 0        | 0     |
| 19 | 1 IT | 2020-11 | 4 IT-Northeast | 2 | 1 | 1.028256 | ##### |
| 20 | 1 IT | 2020-11 | 4 IT-Northeast | 2 | 2 | 1.294118 | ##### |
| 21 | 1 IT | 2020-11 | 4 IT-Northeast | 2 | 3 | 1.299145 | ##### |
| 22 | 1 IT | 2020-11 | 4 IT-Northeast | 2 | 4 | 1.692308 | ##### |
| 23 | 1 IT | 2020-11 | 4 IT-Northeast | 2 | 5 | 0        | 0     |
| 24 | 1 IT | 2020-11 | 4 IT-Northeast | 3 | 1 | 2.095206 | ##### |
| 25 | 1 IT | 2020-11 | 4 IT-Northeast | 3 | 2 | #####    | ##### |
| 26 | 1 IT | 2020-11 | 4 IT-Northeast | 3 | 3 | 3.536842 | ##### |
| 27 | 1 IT | 2020-11 | 4 IT-Northeast | 3 | 4 | 2.5      | ##### |
| 28 | 1 IT | 2020-11 | 4 IT-Northeast | 3 | 5 | 0        | 0     |
| 29 | 1 IT | 2020-11 | 4 IT-Northeast | 3 | 5 | 0        | 0     |
| 30 | 1 IT | 2020-11 | 4 IT-Northwest | 1 | 1 | 1.459486 | ##### |
| 31 | 1 IT | 2020-11 | 4 IT-Northwest | 1 | 2 | #####    | ##### |
| 32 | 1 IT | 2020-11 | 4 IT-Northwest | 1 | 3 | 2.429272 | ##### |
| 33 | 1 IT | 2020-11 | 4 IT-Northwest | 1 | 4 | 2.093167 | ##### |
| 34 | 1 IT | 2020-11 | 4 IT-Northwest | 1 | 5 | #####    | ##### |
| 35 | 1 IT | 2020-11 | 4 IT-Northwest | 2 | 1 | 1.044512 | ##### |
| 36 | 1 IT | 2020-11 | 4 IT-Northwest | 2 | 2 | #####    | ##### |
| 37 | 1 IT | 2020-11 | 4 IT-Northwest | 2 | 3 | 1.68     | ##### |
| 38 | 1 IT | 2020-11 | 4 IT-Northwest | 2 | 4 | 1.814433 | ##### |
| 39 | 1 IT | 2020-11 | 4 IT-Northwest | 2 | 5 | #####    | ##### |
| 40 | 1 IT | 2020-11 | 4 IT-Northwest | 3 | 1 | 1.778377 | ##### |
| 41 | 1 IT | 2020-11 | 4 IT-Northwest | 3 | 2 | 0.5      | ##### |
| 42 | 1 IT | 2020-11 | 4 IT-Northwest | 3 | 3 | 2.813725 | ##### |
| 43 | 1 IT | 2020-11 | 4 IT-Northwest | 3 | 4 | 2.296296 | ##### |
| 44 | 1 IT | 2020-11 | 4 IT-Northwest | 3 | 5 | #####    | ##### |
| 45 | 1 IT | 2020-11 | 4 IT-Overall   | 1 | 1 | 1.169193 | ##### |
| 46 | 1 IT | 2020-11 | 4 IT-Overall   | 1 | 2 | #####    | ##### |
| 47 | 1 IT | 2020-11 | 4 IT-Overall   | 1 | 3 | 1.864018 | ##### |
| 48 | 1 IT | 2020-11 | 4 IT-Overall   | 1 | 4 | 1.535543 | ##### |
| 49 | 1 IT | 2020-11 | 4 IT-Overall   | 1 | 5 | #####    | ##### |
| 50 | 1 IT | 2020-11 | 4 IT-Overall   | 2 | 1 | #####    | ##### |
| 51 | 1 IT | 2020-11 | 4 IT-Overall   | 2 | 2 | #####    | ##### |
| 52 | 1 IT | 2020-11 | 4 IT-Overall   | 2 | 3 | 1.05063  | ##### |
| 53 | 1 IT | 2020-11 | 4 IT-Overall   | 2 | 4 | 1.440801 | ##### |
| 54 | 1 IT | 2020-11 | 4 IT-Overall   | 2 | 5 | #####    | ##### |
| 55 | 1 IT | 2020-11 | 4 IT-Overall   | 3 | 1 | 1.388851 | ##### |
| 56 | 1 IT | 2020-11 | 4 IT-Overall   | 3 | 2 | #####    | ##### |
| 57 | 1 IT | 2020-11 | 4 IT-Overall   | 3 | 3 | 2.348076 | ##### |
| 58 | 1 IT | 2020-11 | 4 IT-Overall   | 3 | 4 | 1.594421 | ##### |
| 59 | 1 IT | 2020-11 | 4 IT-Overall   | 3 | 5 | #####    | ##### |
| 60 | 1 IT | 2020-11 | 4 IT-Overall   | 3 | 5 | #####    | ##### |

1  
2  
3  
4  
5  
6  
7  
8  
9  
10  
11  
12  
13  
14  
15  
16  
17  
18  
19  
20  
21  
22  
23  
24  
25  
26  
27  
28  
29  
30  
31  
32  
33  
34  
35  
36  
37  
38  
39  
40  
41  
42  
43  
44  
45  
46  
47  
48  
49  
50  
51  
52  
53  
54  
55  
56  
57  
58  
59  
60

|      |         |                |   |   |          |       |
|------|---------|----------------|---|---|----------|-------|
| 1 IT | 2020-11 | 4 IT-South     | 1 | 1 | #####    | ##### |
| 1 IT | 2020-11 | 4 IT-South     | 1 | 2 | #####    | ##### |
| 1 IT | 2020-11 | 4 IT-South     | 1 | 3 | 1.456186 | ##### |
| 1 IT | 2020-11 | 4 IT-South     | 1 | 4 | #####    | ##### |
| 1 IT | 2020-11 | 4 IT-South     | 1 | 5 | #####    | ##### |
| 1 IT | 2020-11 | 4 IT-South     | 2 | 1 | #####    | ##### |
| 1 IT | 2020-11 | 4 IT-South     | 2 | 2 | 0.625    | ##### |
| 1 IT | 2020-11 | 4 IT-South     | 2 | 3 | 0.890625 | ##### |
| 1 IT | 2020-11 | 4 IT-South     | 2 | 4 | 0.9      | ##### |
| 1 IT | 2020-11 | 4 IT-South     | 2 | 5 | 0        | 0     |
| 1 IT | 2020-11 | 4 IT-South     | 3 | 1 | #####    | ##### |
| 1 IT | 2020-11 | 4 IT-South     | 3 | 2 | #####    | ##### |
| 1 IT | 2020-11 | 4 IT-South     | 3 | 3 | 1.765957 | ##### |
| 1 IT | 2020-11 | 4 IT-South     | 3 | 4 | 0.575    | ##### |
| 1 IT | 2020-11 | 4 IT-South     | 3 | 5 | #####    | ##### |
| 1 IT | 2020-11 | 5 IT-Central   | 1 | 1 | 1.007073 | ##### |
| 1 IT | 2020-11 | 5 IT-Central   | 1 | 2 | #####    | ##### |
| 1 IT | 2020-11 | 5 IT-Central   | 1 | 3 | 1.102161 | ##### |
| 1 IT | 2020-11 | 5 IT-Central   | 1 | 4 | 1.279772 | ##### |
| 1 IT | 2020-11 | 5 IT-Central   | 1 | 5 | #####    | ##### |
| 1 IT | 2020-11 | 5 IT-Central   | 2 | 1 | #####    | ##### |
| 1 IT | 2020-11 | 5 IT-Central   | 2 | 2 | #####    | ##### |
| 1 IT | 2020-11 | 5 IT-Central   | 2 | 3 | 1.230088 | ##### |
| 1 IT | 2020-11 | 5 IT-Central   | 2 | 4 | #####    | ##### |
| 1 IT | 2020-11 | 5 IT-Central   | 2 | 5 | #####    | ##### |
| 1 IT | 2020-11 | 5 IT-Central   | 3 | 1 | 1.138965 | ##### |
| 1 IT | 2020-11 | 5 IT-Central   | 3 | 2 | 1.153846 | ##### |
| 1 IT | 2020-11 | 5 IT-Central   | 3 | 3 | 1.025    | ##### |
| 1 IT | 2020-11 | 5 IT-Central   | 3 | 4 | 1.611111 | ##### |
| 1 IT | 2020-11 | 5 IT-Central   | 3 | 5 | #####    | ##### |
| 1 IT | 2020-11 | 5 IT-Insular   | 1 | 1 | #####    | ##### |
| 1 IT | 2020-11 | 5 IT-Insular   | 1 | 2 | #####    | ##### |
| 1 IT | 2020-11 | 5 IT-Insular   | 1 | 3 | #####    | ##### |
| 1 IT | 2020-11 | 5 IT-Insular   | 1 | 4 | #####    | ##### |
| 1 IT | 2020-11 | 5 IT-Insular   | 1 | 5 | 1.131064 | ##### |
| 1 IT | 2020-11 | 5 IT-Insular   | 2 | 1 | #####    | ##### |
| 1 IT | 2020-11 | 5 IT-Insular   | 2 | 2 | #####    | ##### |
| 1 IT | 2020-11 | 5 IT-Insular   | 2 | 3 | #####    | ##### |
| 1 IT | 2020-11 | 5 IT-Insular   | 2 | 4 | 0.74     | ##### |
| 1 IT | 2020-11 | 5 IT-Insular   | 2 | 5 | #####    | ##### |
| 1 IT | 2020-11 | 5 IT-Insular   | 3 | 1 | 1.241844 | ##### |
| 1 IT | 2020-11 | 5 IT-Insular   | 3 | 2 | 1.16129  | ##### |
| 1 IT | 2020-11 | 5 IT-Insular   | 3 | 3 | #####    | ##### |
| 1 IT | 2020-11 | 5 IT-Insular   | 3 | 4 | 1.16129  | ##### |
| 1 IT | 2020-11 | 5 IT-Insular   | 3 | 5 | 1.75     | ##### |
| 1 IT | 2020-11 | 5 IT-Northeast | 1 | 1 | 1.235606 | ##### |
| 1 IT | 2020-11 | 5 IT-Northeast | 1 | 2 | #####    | ##### |
| 1 IT | 2020-11 | 5 IT-Northeast | 1 | 3 | 1.286952 | ##### |
| 1 IT | 2020-11 | 5 IT-Northeast | 1 | 4 | 1.358468 | ##### |
| 1 IT | 2020-11 | 5 IT-Northeast | 1 | 5 | 1.400525 | ##### |
| 1 IT | 2020-11 | 5 IT-Northeast | 2 | 1 | #####    | ##### |
| 1 IT | 2020-11 | 5 IT-Northeast | 2 | 2 | #####    | ##### |
| 1 IT | 2020-11 | 5 IT-Northeast | 2 | 3 | #####    | ##### |
| 1 IT | 2020-11 | 5 IT-Northeast | 2 | 4 | #####    | ##### |
| 1 IT | 2020-11 | 5 IT-Northeast | 2 | 5 | 1.242424 | ##### |
| 1 IT | 2020-11 | 5 IT-Northeast | 3 | 1 | 1.479166 | ##### |

|    |      |         |                |   |   |          |       |
|----|------|---------|----------------|---|---|----------|-------|
| 1  |      |         |                |   |   |          |       |
| 2  |      |         |                |   |   |          |       |
| 3  | 1 IT | 2020-11 | 5 IT-Northeast | 3 | 2 | #####    | ##### |
| 4  | 1 IT | 2020-11 | 5 IT-Northeast | 3 | 3 | 1.615385 | ##### |
| 5  | 1 IT | 2020-11 | 5 IT-Northeast | 3 | 4 | 1.722222 | ##### |
| 6  | 1 IT | 2020-11 | 5 IT-Northeast | 3 | 5 | 1.571429 | ##### |
| 7  | 1 IT | 2020-11 | 5 IT-Northwest | 1 | 1 | #####    | ##### |
| 8  | 1 IT | 2020-11 | 5 IT-Northwest | 1 | 2 | #####    | ##### |
| 9  | 1 IT | 2020-11 | 5 IT-Northwest | 1 | 3 | #####    | ##### |
| 10 | 1 IT | 2020-11 | 5 IT-Northwest | 1 | 4 | 1.07314  | ##### |
| 11 | 1 IT | 2020-11 | 5 IT-Northwest | 1 | 5 | 1.050218 | ##### |
| 12 | 1 IT | 2020-11 | 5 IT-Northwest | 2 | 1 | #####    | ##### |
| 13 | 1 IT | 2020-11 | 5 IT-Northwest | 2 | 2 | #####    | ##### |
| 14 | 1 IT | 2020-11 | 5 IT-Northwest | 2 | 3 | #####    | ##### |
| 15 | 1 IT | 2020-11 | 5 IT-Northwest | 2 | 4 | 1.226804 | ##### |
| 16 | 1 IT | 2020-11 | 5 IT-Northwest | 2 | 5 | #####    | ##### |
| 17 | 1 IT | 2020-11 | 5 IT-Northwest | 3 | 1 | 1.164846 | ##### |
| 18 | 1 IT | 2020-11 | 5 IT-Northwest | 3 | 2 | 1.132075 | ##### |
| 19 | 1 IT | 2020-11 | 5 IT-Northwest | 3 | 3 | 1.038835 | ##### |
| 20 | 1 IT | 2020-11 | 5 IT-Northwest | 3 | 4 | #####    | ##### |
| 21 | 1 IT | 2020-11 | 5 IT-Northwest | 3 | 5 | 1.83871  | ##### |
| 22 | 1 IT | 2020-11 | 5 IT-Overall   | 1 | 1 | 1.085631 | ##### |
| 23 | 1 IT | 2020-11 | 5 IT-Overall   | 1 | 2 | #####    | ##### |
| 24 | 1 IT | 2020-11 | 5 IT-Overall   | 1 | 3 | 1.023966 | ##### |
| 25 | 1 IT | 2020-11 | 5 IT-Overall   | 1 | 4 | 1.326293 | ##### |
| 26 | 1 IT | 2020-11 | 5 IT-Overall   | 1 | 5 | 1.031612 | ##### |
| 27 | 1 IT | 2020-11 | 5 IT-Overall   | 2 | 1 | #####    | ##### |
| 28 | 1 IT | 2020-11 | 5 IT-Overall   | 2 | 2 | #####    | ##### |
| 29 | 1 IT | 2020-11 | 5 IT-Overall   | 2 | 3 | #####    | ##### |
| 30 | 1 IT | 2020-11 | 5 IT-Overall   | 2 | 4 | #####    | ##### |
| 31 | 1 IT | 2020-11 | 5 IT-Overall   | 2 | 5 | #####    | ##### |
| 32 | 1 IT | 2020-11 | 5 IT-Overall   | 3 | 1 | 1.330756 | ##### |
| 33 | 1 IT | 2020-11 | 5 IT-Overall   | 3 | 2 | #####    | ##### |
| 34 | 1 IT | 2020-11 | 5 IT-Overall   | 3 | 3 | 1.216368 | ##### |
| 35 | 1 IT | 2020-11 | 5 IT-Overall   | 3 | 4 | 1.608575 | ##### |
| 36 | 1 IT | 2020-11 | 5 IT-Overall   | 3 | 5 | 1.369806 | ##### |
| 37 | 1 IT | 2020-11 | 5 IT-South     | 1 | 1 | 1.217677 | ##### |
| 38 | 1 IT | 2020-11 | 5 IT-South     | 1 | 2 | #####    | ##### |
| 39 | 1 IT | 2020-11 | 5 IT-South     | 1 | 3 | 1.047469 | ##### |
| 40 | 1 IT | 2020-11 | 5 IT-South     | 1 | 4 | 1.693557 | ##### |
| 41 | 1 IT | 2020-11 | 5 IT-South     | 1 | 5 | 1.072462 | ##### |
| 42 | 1 IT | 2020-11 | 5 IT-South     | 2 | 1 | #####    | ##### |
| 43 | 1 IT | 2020-11 | 5 IT-South     | 2 | 2 | 0.55     | ##### |
| 44 | 1 IT | 2020-11 | 5 IT-South     | 2 | 3 | #####    | ##### |
| 45 | 1 IT | 2020-11 | 5 IT-South     | 2 | 4 | 0.78     | ##### |
| 46 | 1 IT | 2020-11 | 5 IT-South     | 2 | 5 | #####    | ##### |
| 47 | 1 IT | 2020-11 | 5 IT-South     | 3 | 1 | 1.540674 | ##### |
| 48 | 1 IT | 2020-11 | 5 IT-South     | 3 | 2 | #####    | ##### |
| 49 | 1 IT | 2020-11 | 5 IT-South     | 3 | 3 | 1.375    | ##### |
| 50 | 1 IT | 2020-11 | 5 IT-South     | 3 | 4 | 2.146341 | ##### |
| 51 | 1 IT | 2020-11 | 5 IT-South     | 3 | 5 | 1.352941 | ##### |
| 52 | 1 IT | 2020-12 | 1 IT-Central   | 1 | 1 | 3.199611 | ##### |
| 53 | 1 IT | 2020-12 | 1 IT-Central   | 1 | 2 | 4.087806 | ##### |
| 54 | 1 IT | 2020-12 | 1 IT-Central   | 1 | 3 | 3.381148 | ##### |
| 55 | 1 IT | 2020-12 | 1 IT-Central   | 1 | 4 | 3.616457 | ##### |
| 56 | 1 IT | 2020-12 | 1 IT-Central   | 1 | 5 | 2.054248 | ##### |
| 57 | 1 IT | 2020-12 | 1 IT-Central   | 2 | 1 | 2.741092 | ##### |
| 58 | 1 IT | 2020-12 | 1 IT-Central   | 2 | 2 | 3.518519 | ##### |

|    |      |         |                |   |   |          |          |  |
|----|------|---------|----------------|---|---|----------|----------|--|
| 1  |      |         |                |   |   |          |          |  |
| 2  |      |         |                |   |   |          |          |  |
| 3  | 1 IT | 2020-12 | 1 IT-Central   | 2 | 3 | 3.490909 | #####    |  |
| 4  | 1 IT | 2020-12 | 1 IT-Central   | 2 | 4 | 3.125    | #####    |  |
| 5  | 1 IT | 2020-12 | 1 IT-Central   | 2 | 5 | 1.333333 | 0.351387 |  |
| 6  | 1 IT | 2020-12 | 1 IT-Central   | 3 | 1 | 3.524598 | #####    |  |
| 7  | 1 IT | 2020-12 | 1 IT-Central   | 3 | 2 | 4.380952 | #####    |  |
| 8  | 1 IT | 2020-12 | 1 IT-Central   | 3 | 3 | 3.30303  | #####    |  |
| 9  | 1 IT | 2020-12 | 1 IT-Central   | 3 | 4 | 3.962963 | #####    |  |
| 10 | 1 IT | 2020-12 | 1 IT-Central   | 3 | 5 | 2.666667 | #####    |  |
| 11 | 1 IT | 2020-12 | 1 IT-Insular   | 1 | 1 | 3.270215 | #####    |  |
| 12 | 1 IT | 2020-12 | 1 IT-Insular   | 1 | 2 | 4.173982 | #####    |  |
| 13 | 1 IT | 2020-12 | 1 IT-Insular   | 1 | 3 | 3.965327 | #####    |  |
| 14 | 1 IT | 2020-12 | 1 IT-Insular   | 1 | 4 | 3.793872 | #####    |  |
| 15 | 1 IT | 2020-12 | 1 IT-Insular   | 1 | 5 | 1.327994 | #####    |  |
| 16 | 1 IT | 2020-12 | 1 IT-Insular   | 2 | 1 | 2.769121 | #####    |  |
| 17 | 1 IT | 2020-12 | 1 IT-Insular   | 2 | 2 | 3.027027 | #####    |  |
| 18 | 1 IT | 2020-12 | 1 IT-Insular   | 2 | 3 | 3.325    | #####    |  |
| 19 | 1 IT | 2020-12 | 1 IT-Insular   | 2 | 4 | 2.3      | #####    |  |
| 20 | 1 IT | 2020-12 | 1 IT-Insular   | 2 | 5 | 2.142857 | #####    |  |
| 21 | 1 IT | 2020-12 | 1 IT-Insular   | 3 | 1 | 3.62255  | #####    |  |
| 22 | 1 IT | 2020-12 | 1 IT-Insular   | 3 | 2 | 5.545455 | 1.410581 |  |
| 23 | 1 IT | 2020-12 | 1 IT-Insular   | 3 | 3 | 4.47619  | #####    |  |
| 24 | 1 IT | 2020-12 | 1 IT-Insular   | 3 | 4 | 4.846154 | 1.103301 |  |
| 25 | 1 IT | 2020-12 | 1 IT-Insular   | 3 | 5 | 1        | #####    |  |
| 26 | 1 IT | 2020-12 | 1 IT-Northeast | 1 | 1 | 2.928365 | #####    |  |
| 27 | 1 IT | 2020-12 | 1 IT-Northeast | 1 | 2 | 4.004368 | #####    |  |
| 28 | 1 IT | 2020-12 | 1 IT-Northeast | 1 | 3 | 3.483264 | #####    |  |
| 29 | 1 IT | 2020-12 | 1 IT-Northeast | 1 | 4 | 2.720805 | #####    |  |
| 30 | 1 IT | 2020-12 | 1 IT-Northeast | 1 | 5 | 1.968967 | #####    |  |
| 31 | 1 IT | 2020-12 | 1 IT-Northeast | 2 | 1 | 2.438188 | #####    |  |
| 32 | 1 IT | 2020-12 | 1 IT-Northeast | 2 | 2 | 2.514286 | #####    |  |
| 33 | 1 IT | 2020-12 | 1 IT-Northeast | 2 | 3 | 3.650794 | #####    |  |
| 34 | 1 IT | 2020-12 | 1 IT-Northeast | 2 | 4 | 2.4      | #####    |  |
| 35 | 1 IT | 2020-12 | 1 IT-Northeast | 2 | 5 | 1.521739 | #####    |  |
| 36 | 1 IT | 2020-12 | 1 IT-Northeast | 3 | 1 | 3.439778 | #####    |  |
| 37 | 1 IT | 2020-12 | 1 IT-Northeast | 3 | 2 | 4.782609 | #####    |  |
| 38 | 1 IT | 2020-12 | 1 IT-Northeast | 3 | 3 | 3.341463 | #####    |  |
| 39 | 1 IT | 2020-12 | 1 IT-Northeast | 3 | 4 | 3.142857 | #####    |  |
| 40 | 1 IT | 2020-12 | 1 IT-Northeast | 3 | 5 | 2.642857 | #####    |  |
| 41 | 1 IT | 2020-12 | 1 IT-Northwest | 1 | 1 | 2.853233 | #####    |  |
| 42 | 1 IT | 2020-12 | 1 IT-Northwest | 1 | 2 | 3.207819 | #####    |  |
| 43 | 1 IT | 2020-12 | 1 IT-Northwest | 1 | 3 | 3.725324 | #####    |  |
| 44 | 1 IT | 2020-12 | 1 IT-Northwest | 1 | 4 | 2.68645  | #####    |  |
| 45 | 1 IT | 2020-12 | 1 IT-Northwest | 1 | 5 | 2.098928 | #####    |  |
| 46 | 1 IT | 2020-12 | 1 IT-Northwest | 2 | 1 | 2.532614 | #####    |  |
| 47 | 1 IT | 2020-12 | 1 IT-Northwest | 2 | 2 | 3.344828 | #####    |  |
| 48 | 1 IT | 2020-12 | 1 IT-Northwest | 2 | 3 | 2.716667 | #####    |  |
| 49 | 1 IT | 2020-12 | 1 IT-Northwest | 2 | 4 | 2.74359  | #####    |  |
| 50 | 1 IT | 2020-12 | 1 IT-Northwest | 2 | 5 | 1.807692 | #####    |  |
| 51 | 1 IT | 2020-12 | 1 IT-Northwest | 3 | 1 | 3.199257 | #####    |  |
| 52 | 1 IT | 2020-12 | 1 IT-Northwest | 3 | 2 | 3.05     | #####    |  |
| 53 | 1 IT | 2020-12 | 1 IT-Northwest | 3 | 3 | 4.470588 | #####    |  |
| 54 | 1 IT | 2020-12 | 1 IT-Northwest | 3 | 4 | 2.611111 | #####    |  |
| 55 | 1 IT | 2020-12 | 1 IT-Northwest | 3 | 5 | 2.45     | #####    |  |
| 56 | 1 IT | 2020-12 | 1 IT-Overall   | 1 | 1 | 3.159399 | #####    |  |
| 57 | 1 IT | 2020-12 | 1 IT-Overall   | 1 | 2 | 3.906679 | #####    |  |
| 58 | 1 IT | 2020-12 | 1 IT-Overall   | 1 | 3 | 3.873703 | #####    |  |
| 59 | 1 IT | 2020-12 | 1 IT-Overall   | 1 |   |          |          |  |
| 60 | 1 IT | 2020-12 | 1 IT-Overall   | 1 |   |          |          |  |



|    |      |         |              |   |   |          |          |  |
|----|------|---------|--------------|---|---|----------|----------|--|
| 1  |      |         |              |   |   |          |          |  |
| 2  |      |         |              |   |   |          |          |  |
| 3  | 1 IT | 2020-12 | 1 IT-Overall | 1 | 4 | 3.17041  | #####    |  |
| 4  | 1 IT | 2020-12 | 1 IT-Overall | 1 | 5 | 1.980293 | #####    |  |
| 5  | 1 IT | 2020-12 | 1 IT-Overall | 2 | 1 | 2.664273 | #####    |  |
| 6  | 1 IT | 2020-12 | 1 IT-Overall | 2 | 2 | 3.053373 | #####    |  |
| 7  | 1 IT | 2020-12 | 1 IT-Overall | 2 | 3 | 3.513161 | #####    |  |
| 8  | 1 IT | 2020-12 | 1 IT-Overall | 2 | 4 | 2.741303 | #####    |  |
| 9  | 1 IT | 2020-12 | 1 IT-Overall | 2 | 5 | 1.568751 | #####    |  |
| 10 | 1 IT | 2020-12 | 1 IT-Overall | 3 | 1 | 3.616894 | #####    |  |
| 11 | 1 IT | 2020-12 | 1 IT-Overall | 3 | 2 | 4.534053 | #####    |  |
| 12 | 1 IT | 2020-12 | 1 IT-Overall | 3 | 3 | 4.17308  | #####    |  |
| 13 | 1 IT | 2020-12 | 1 IT-Overall | 3 | 4 | 3.686225 | #####    |  |
| 14 | 1 IT | 2020-12 | 1 IT-Overall | 3 | 5 | 2.360287 | #####    |  |
| 15 | 1 IT | 2020-12 | 1 IT-South   | 1 | 1 | 3.408326 | #####    |  |
| 16 | 1 IT | 2020-12 | 1 IT-South   | 1 | 2 | 4.099574 | #####    |  |
| 17 | 1 IT | 2020-12 | 1 IT-South   | 1 | 3 | 4.437958 | #####    |  |
| 18 | 1 IT | 2020-12 | 1 IT-South   | 1 | 4 | 3.061235 | #####    |  |
| 19 | 1 IT | 2020-12 | 1 IT-South   | 1 | 5 | 2.185624 | #####    |  |
| 20 | 1 IT | 2020-12 | 1 IT-South   | 2 | 1 | 2.794814 | #####    |  |
| 21 | 1 IT | 2020-12 | 1 IT-South   | 2 | 2 | 2.761905 | #####    |  |
| 22 | 1 IT | 2020-12 | 1 IT-South   | 2 | 3 | 3.918367 | #####    |  |
| 23 | 1 IT | 2020-12 | 1 IT-South   | 2 | 4 | 2.894737 | #####    |  |
| 24 | 1 IT | 2020-12 | 1 IT-South   | 2 | 5 | 1.357143 | #####    |  |
| 25 | 1 IT | 2020-12 | 1 IT-South   | 3 | 1 | 4.067598 | #####    |  |
| 26 | 1 IT | 2020-12 | 1 IT-South   | 3 | 2 | 4.882353 | #####    |  |
| 27 | 1 IT | 2020-12 | 1 IT-South   | 3 | 3 | 4.95     | 1.223752 |  |
| 28 | 1 IT | 2020-12 | 1 IT-South   | 3 | 4 | 3.428571 | #####    |  |
| 29 | 1 IT | 2020-12 | 1 IT-South   | 3 | 5 | 2.916667 | #####    |  |
| 30 | 1 IT | 2020-12 | 2 IT-Central | 1 | 1 | 1.801807 | #####    |  |
| 31 | 1 IT | 2020-12 | 2 IT-Central | 1 | 2 | 2.741963 | #####    |  |
| 32 | 1 IT | 2020-12 | 2 IT-Central | 1 | 3 | 1.739095 | #####    |  |
| 33 | 1 IT | 2020-12 | 2 IT-Central | 1 | 4 | 2.015597 | #####    |  |
| 34 | 1 IT | 2020-12 | 2 IT-Central | 1 | 5 | 1.088687 | #####    |  |
| 35 | 1 IT | 2020-12 | 2 IT-Central | 2 | 1 | 1.683967 | #####    |  |
| 36 | 1 IT | 2020-12 | 2 IT-Central | 2 | 2 | 2.333333 | #####    |  |
| 37 | 1 IT | 2020-12 | 2 IT-Central | 2 | 3 | 1.690909 | #####    |  |
| 38 | 1 IT | 2020-12 | 2 IT-Central | 2 | 4 | 2.40625  | #####    |  |
| 39 | 1 IT | 2020-12 | 2 IT-Central | 2 | 5 | #####    | #####    |  |
| 40 | 1 IT | 2020-12 | 2 IT-Central | 3 | 1 | 1.883077 | #####    |  |
| 41 | 1 IT | 2020-12 | 2 IT-Central | 3 | 2 | 2.952381 | #####    |  |
| 42 | 1 IT | 2020-12 | 2 IT-Central | 3 | 3 | 1.771429 | #####    |  |
| 43 | 1 IT | 2020-12 | 2 IT-Central | 3 | 4 | 1.75     | #####    |  |
| 44 | 1 IT | 2020-12 | 2 IT-Central | 3 | 5 | 1.4      | #####    |  |
| 45 | 1 IT | 2020-12 | 2 IT-Insular | 1 | 1 | 2.02562  | #####    |  |
| 46 | 1 IT | 2020-12 | 2 IT-Insular | 1 | 2 | 2.936556 | #####    |  |
| 47 | 1 IT | 2020-12 | 2 IT-Insular | 1 | 3 | 2.627154 | #####    |  |
| 48 | 1 IT | 2020-12 | 2 IT-Insular | 1 | 4 | 1.830883 | #####    |  |
| 49 | 1 IT | 2020-12 | 2 IT-Insular | 1 | 5 | #####    | #####    |  |
| 50 | 1 IT | 2020-12 | 2 IT-Insular | 2 | 1 | 1.947701 | #####    |  |
| 51 | 1 IT | 2020-12 | 2 IT-Insular | 2 | 2 | 2.736842 | #####    |  |
| 52 | 1 IT | 2020-12 | 2 IT-Insular | 2 | 3 | 2.175    | #####    |  |
| 53 | 1 IT | 2020-12 | 2 IT-Insular | 2 | 4 | 1.7      | #####    |  |
| 54 | 1 IT | 2020-12 | 2 IT-Insular | 2 | 5 | #####    | #####    |  |
| 55 | 1 IT | 2020-12 | 2 IT-Insular | 3 | 1 | 2.079319 | #####    |  |
| 56 | 1 IT | 2020-12 | 2 IT-Insular | 3 | 2 | 3.181818 | #####    |  |
| 57 | 1 IT | 2020-12 | 2 IT-Insular | 3 | 3 | 2.956522 | #####    |  |
| 58 | 1 IT | 2020-12 | 2 IT-Insular | 3 | 4 | 1.923077 | #####    |  |
| 59 | 1 IT | 2020-12 | 2 IT-Insular | 3 |   |          |          |  |
| 60 | 1 IT | 2020-12 | 2 IT-Insular | 3 |   |          |          |  |

|    |      |         |                |   |   |          |       |  |
|----|------|---------|----------------|---|---|----------|-------|--|
| 1  |      |         |                |   |   |          |       |  |
| 2  |      |         |                |   |   |          |       |  |
| 3  | 1 IT | 2020-12 | 2 IT-Insular   | 3 | 5 | 0.875    | ##### |  |
| 4  | 1 IT | 2020-12 | 2 IT-Northeast | 1 | 1 | 1.518976 | ##### |  |
| 5  | 1 IT | 2020-12 | 2 IT-Northeast | 1 | 2 | 2.546591 | ##### |  |
| 6  | 1 IT | 2020-12 | 2 IT-Northeast | 1 | 3 | 1.648211 | ##### |  |
| 7  | 1 IT | 2020-12 | 2 IT-Northeast | 1 | 4 | 1.266837 | ##### |  |
| 8  | 1 IT | 2020-12 | 2 IT-Northeast | 1 | 5 | 1.028494 | ##### |  |
| 9  | 1 IT | 2020-12 | 2 IT-Northeast | 2 | 1 | 1.425081 | ##### |  |
| 10 | 1 IT | 2020-12 | 2 IT-Northeast | 2 | 2 | 2.162162 | ##### |  |
| 11 | 1 IT | 2020-12 | 2 IT-Northeast | 2 | 3 | 1.880597 | ##### |  |
| 12 | 1 IT | 2020-12 | 2 IT-Northeast | 2 | 4 | 1.217391 | ##### |  |
| 13 | 1 IT | 2020-12 | 2 IT-Northeast | 2 | 5 | 1        | ##### |  |
| 14 | 1 IT | 2020-12 | 2 IT-Northeast | 3 | 1 | 1.61886  | ##### |  |
| 15 | 1 IT | 2020-12 | 2 IT-Northeast | 3 | 2 | 2.75     | ##### |  |
| 16 | 1 IT | 2020-12 | 2 IT-Northeast | 3 | 3 | 1.439024 | ##### |  |
| 17 | 1 IT | 2020-12 | 2 IT-Northeast | 3 | 4 | 1.333333 | ##### |  |
| 18 | 1 IT | 2020-12 | 2 IT-Northeast | 3 | 5 | 1.071429 | ##### |  |
| 19 | 1 IT | 2020-12 | 2 IT-Northeast | 1 | 1 | 1.74352  | ##### |  |
| 20 | 1 IT | 2020-12 | 2 IT-Northeast | 1 | 2 | 2.339995 | ##### |  |
| 21 | 1 IT | 2020-12 | 2 IT-Northeast | 1 | 3 | 1.852977 | ##### |  |
| 22 | 1 IT | 2020-12 | 2 IT-Northeast | 1 | 4 | 1.550622 | ##### |  |
| 23 | 1 IT | 2020-12 | 2 IT-Northeast | 1 | 5 | 1.441879 | ##### |  |
| 24 | 1 IT | 2020-12 | 2 IT-Northeast | 2 | 1 | 1.805741 | ##### |  |
| 25 | 1 IT | 2020-12 | 2 IT-Northeast | 2 | 2 | 2.559322 | ##### |  |
| 26 | 1 IT | 2020-12 | 2 IT-Northeast | 2 | 3 | 2        | ##### |  |
| 27 | 1 IT | 2020-12 | 2 IT-Northeast | 2 | 4 | 1.775    | ##### |  |
| 28 | 1 IT | 2020-12 | 2 IT-Northeast | 2 | 5 | 1.269231 | ##### |  |
| 29 | 1 IT | 2020-12 | 2 IT-Northeast | 3 | 1 | 1.675956 | ##### |  |
| 30 | 1 IT | 2020-12 | 2 IT-Northeast | 3 | 2 | 2.095238 | ##### |  |
| 31 | 1 IT | 2020-12 | 2 IT-Northeast | 3 | 3 | 1.735294 | ##### |  |
| 32 | 1 IT | 2020-12 | 2 IT-Northeast | 3 | 4 | 1.263158 | ##### |  |
| 33 | 1 IT | 2020-12 | 2 IT-Northeast | 3 | 5 | 1.65     | ##### |  |
| 34 | 1 IT | 2020-12 | 2 IT-Overall   | 1 | 1 | 1.84434  | ##### |  |
| 35 | 1 IT | 2020-12 | 2 IT-Overall   | 1 | 2 | 2.689649 | ##### |  |
| 36 | 1 IT | 2020-12 | 2 IT-Overall   | 1 | 3 | 2.091088 | ##### |  |
| 37 | 1 IT | 2020-12 | 2 IT-Overall   | 1 | 4 | 1.61056  | ##### |  |
| 38 | 1 IT | 2020-12 | 2 IT-Overall   | 1 | 5 | 1.293163 | ##### |  |
| 39 | 1 IT | 2020-12 | 2 IT-Overall   | 2 | 1 | 1.729273 | ##### |  |
| 40 | 1 IT | 2020-12 | 2 IT-Overall   | 2 | 2 | 2.480209 | ##### |  |
| 41 | 1 IT | 2020-12 | 2 IT-Overall   | 2 | 3 | 2.13645  | ##### |  |
| 42 | 1 IT | 2020-12 | 2 IT-Overall   | 2 | 4 | 1.632652 | ##### |  |
| 43 | 1 IT | 2020-12 | 2 IT-Overall   | 2 | 5 | 1.024332 | ##### |  |
| 44 | 1 IT | 2020-12 | 2 IT-Overall   | 3 | 1 | 1.94992  | ##### |  |
| 45 | 1 IT | 2020-12 | 2 IT-Overall   | 3 | 2 | 2.843835 | ##### |  |
| 46 | 1 IT | 2020-12 | 2 IT-Overall   | 3 | 3 | 2.053097 | ##### |  |
| 47 | 1 IT | 2020-12 | 2 IT-Overall   | 3 | 4 | 1.584979 | ##### |  |
| 48 | 1 IT | 2020-12 | 2 IT-Overall   | 3 | 5 | 1.541386 | ##### |  |
| 49 | 1 IT | 2020-12 | 2 IT-South     | 1 | 1 | 2.032124 | ##### |  |
| 50 | 1 IT | 2020-12 | 2 IT-South     | 1 | 2 | 2.86327  | ##### |  |
| 51 | 1 IT | 2020-12 | 2 IT-South     | 1 | 3 | 2.401406 | ##### |  |
| 52 | 1 IT | 2020-12 | 2 IT-South     | 1 | 4 | 1.447993 | ##### |  |
| 53 | 1 IT | 2020-12 | 2 IT-South     | 1 | 5 | 1.697533 | ##### |  |
| 54 | 1 IT | 2020-12 | 2 IT-South     | 2 | 1 | 1.787384 | ##### |  |
| 55 | 1 IT | 2020-12 | 2 IT-South     | 2 | 2 | 2.428571 | ##### |  |
| 56 | 1 IT | 2020-12 | 2 IT-South     | 2 | 3 | 2.54902  | ##### |  |
| 57 | 1 IT | 2020-12 | 2 IT-South     | 2 | 4 | 1.421053 | ##### |  |
| 58 | 1 IT | 2020-12 | 2 IT-South     | 2 | 5 | 1.071429 | ##### |  |
| 59 | 1 IT | 2020-12 | 2 IT-South     | 2 |   |          |       |  |
| 60 | 1 IT | 2020-12 | 2 IT-South     | 2 |   |          |       |  |

|    |      |         |                |   |   |          |       |  |
|----|------|---------|----------------|---|---|----------|-------|--|
| 1  |      |         |                |   |   |          |       |  |
| 2  |      |         |                |   |   |          |       |  |
| 3  | 1 IT | 2020-12 | 2 IT-South     | 3 | 1 | 2.291917 | ##### |  |
| 4  | 1 IT | 2020-12 | 2 IT-South     | 3 | 2 | 3.117647 | ##### |  |
| 5  | 1 IT | 2020-12 | 2 IT-South     | 3 | 3 | 2.25     | ##### |  |
| 6  | 1 IT | 2020-12 | 2 IT-South     | 3 | 4 | 1.5      | ##### |  |
| 7  | 1 IT | 2020-12 | 2 IT-South     | 3 | 5 | 2.25     | ##### |  |
| 8  | 1 IT | 2020-12 | 3 IT-Central   | 1 | 1 | #####    | ##### |  |
| 9  | 1 IT | 2020-12 | 3 IT-Central   | 1 | 2 | 0        | 0     |  |
| 10 | 1 IT | 2020-12 | 3 IT-Central   | 1 | 3 | 0        | 0     |  |
| 11 | 1 IT | 2020-12 | 3 IT-Central   | 1 | 4 | 0        | 0     |  |
| 12 | 1 IT | 2020-12 | 3 IT-Central   | 1 | 5 | #####    | ##### |  |
| 13 | 1 IT | 2020-12 | 3 IT-Central   | 2 | 1 | #####    | ##### |  |
| 14 | 1 IT | 2020-12 | 3 IT-Central   | 2 | 2 | 0        | 0     |  |
| 15 | 1 IT | 2020-12 | 3 IT-Central   | 2 | 3 | 0        | 0     |  |
| 16 | 1 IT | 2020-12 | 3 IT-Central   | 2 | 4 | 0        | 0     |  |
| 17 | 1 IT | 2020-12 | 3 IT-Central   | 2 | 5 | #####    | ##### |  |
| 18 | 1 IT | 2020-12 | 3 IT-Central   | 3 | 1 | 0        | 0     |  |
| 19 | 1 IT | 2020-12 | 3 IT-Central   | 3 | 2 | 0        | 0     |  |
| 20 | 1 IT | 2020-12 | 3 IT-Central   | 3 | 3 | 0        | 0     |  |
| 21 | 1 IT | 2020-12 | 3 IT-Central   | 3 | 4 | 0        | 0     |  |
| 22 | 1 IT | 2020-12 | 3 IT-Central   | 3 | 5 | 0        | 0     |  |
| 23 | 1 IT | 2020-12 | 3 IT-Central   | 3 | 5 | 0        | 0     |  |
| 24 | 1 IT | 2020-12 | 3 IT-Insular   | 1 | 1 | #####    | ##### |  |
| 25 | 1 IT | 2020-12 | 3 IT-Insular   | 1 | 2 | 0        | 0     |  |
| 26 | 1 IT | 2020-12 | 3 IT-Insular   | 1 | 3 | #####    | ##### |  |
| 27 | 1 IT | 2020-12 | 3 IT-Insular   | 1 | 4 | 0        | 0     |  |
| 28 | 1 IT | 2020-12 | 3 IT-Insular   | 1 | 5 | 0        | 0     |  |
| 29 | 1 IT | 2020-12 | 3 IT-Insular   | 2 | 1 | 0        | 0     |  |
| 30 | 1 IT | 2020-12 | 3 IT-Insular   | 2 | 2 | 0        | 0     |  |
| 31 | 1 IT | 2020-12 | 3 IT-Insular   | 2 | 3 | 0        | 0     |  |
| 32 | 1 IT | 2020-12 | 3 IT-Insular   | 2 | 4 | 0        | 0     |  |
| 33 | 1 IT | 2020-12 | 3 IT-Insular   | 2 | 5 | 0        | 0     |  |
| 34 | 1 IT | 2020-12 | 3 IT-Insular   | 3 | 1 | #####    | ##### |  |
| 35 | 1 IT | 2020-12 | 3 IT-Insular   | 3 | 2 | 0        | 0     |  |
| 36 | 1 IT | 2020-12 | 3 IT-Insular   | 3 | 3 | #####    | ##### |  |
| 37 | 1 IT | 2020-12 | 3 IT-Insular   | 3 | 4 | 0        | 0     |  |
| 38 | 1 IT | 2020-12 | 3 IT-Insular   | 3 | 5 | 0        | 0     |  |
| 39 | 1 IT | 2020-12 | 3 IT-Northeast | 1 | 1 | #####    | ##### |  |
| 40 | 1 IT | 2020-12 | 3 IT-Northeast | 1 | 2 | 0        | 0     |  |
| 41 | 1 IT | 2020-12 | 3 IT-Northeast | 1 | 3 | 0        | 0     |  |
| 42 | 1 IT | 2020-12 | 3 IT-Northeast | 1 | 4 | #####    | ##### |  |
| 43 | 1 IT | 2020-12 | 3 IT-Northeast | 1 | 5 | #####    | ##### |  |
| 44 | 1 IT | 2020-12 | 3 IT-Northeast | 2 | 1 | 0        | 0     |  |
| 45 | 1 IT | 2020-12 | 3 IT-Northeast | 2 | 2 | 0        | 0     |  |
| 46 | 1 IT | 2020-12 | 3 IT-Northeast | 2 | 3 | 0        | 0     |  |
| 47 | 1 IT | 2020-12 | 3 IT-Northeast | 2 | 4 | 0        | 0     |  |
| 48 | 1 IT | 2020-12 | 3 IT-Northeast | 2 | 5 | 0        | 0     |  |
| 49 | 1 IT | 2020-12 | 3 IT-Northeast | 3 | 1 | #####    | ##### |  |
| 50 | 1 IT | 2020-12 | 3 IT-Northeast | 3 | 2 | 0        | 0     |  |
| 51 | 1 IT | 2020-12 | 3 IT-Northeast | 3 | 3 | 0        | 0     |  |
| 52 | 1 IT | 2020-12 | 3 IT-Northeast | 3 | 4 | #####    | ##### |  |
| 53 | 1 IT | 2020-12 | 3 IT-Northeast | 3 | 5 | #####    | ##### |  |
| 54 | 1 IT | 2020-12 | 3 IT-Northeast | 3 | 5 | #####    | ##### |  |
| 55 | 1 IT | 2020-12 | 3 IT-Northwest | 1 | 1 | #####    | ##### |  |
| 56 | 1 IT | 2020-12 | 3 IT-Northwest | 1 | 2 | #####    | ##### |  |
| 57 | 1 IT | 2020-12 | 3 IT-Northwest | 1 | 3 | #####    | ##### |  |
| 58 | 1 IT | 2020-12 | 3 IT-Northwest | 1 | 4 | #####    | ##### |  |
| 59 | 1 IT | 2020-12 | 3 IT-Northwest | 1 | 5 | 0        | 0     |  |
| 60 | 1 IT | 2020-12 | 3 IT-Northwest | 2 | 1 | #####    | ##### |  |

1  
2  
3  
4  
5  
6  
7  
8  
9  
10  
11  
12  
13  
14  
15  
16  
17  
18  
19  
20  
21  
22  
23  
24  
25  
26  
27  
28  
29  
30  
31  
32  
33  
34  
35  
36  
37  
38  
39  
40  
41  
42  
43  
44  
45  
46  
47  
48  
49  
50  
51  
52  
53  
54  
55  
56  
57  
58  
59  
60

|      |         |              |   |   |          |       |
|------|---------|--------------|---|---|----------|-------|
| 1 IT | 2020-12 | 3 IT-Northwe | 2 | 2 | #####    | ##### |
| 1 IT | 2020-12 | 3 IT-Northwe | 2 | 3 | 0        | 0     |
| 1 IT | 2020-12 | 3 IT-Northwe | 2 | 4 | 0.125    | ##### |
| 1 IT | 2020-12 | 3 IT-Northwe | 2 | 5 | 0        | 0     |
| 1 IT | 2020-12 | 3 IT-Northwe | 3 | 1 | #####    | ##### |
| 1 IT | 2020-12 | 3 IT-Northwe | 3 | 2 | 0        | 0     |
| 1 IT | 2020-12 | 3 IT-Northwe | 3 | 3 | #####    | ##### |
| 1 IT | 2020-12 | 3 IT-Northwe | 3 | 4 | #####    | ##### |
| 1 IT | 2020-12 | 3 IT-Northwe | 3 | 5 | 0        | 0     |
| 1 IT | 2020-12 | 3 IT-Overall | 1 | 1 | #####    | ##### |
| 1 IT | 2020-12 | 3 IT-Overall | 1 | 2 | #####    | ##### |
| 1 IT | 2020-12 | 3 IT-Overall | 1 | 3 | #####    | ##### |
| 1 IT | 2020-12 | 3 IT-Overall | 1 | 4 | #####    | ##### |
| 1 IT | 2020-12 | 3 IT-Overall | 1 | 5 | #####    | ##### |
| 1 IT | 2020-12 | 3 IT-Overall | 2 | 1 | #####    | ##### |
| 1 IT | 2020-12 | 3 IT-Overall | 2 | 2 | #####    | ##### |
| 1 IT | 2020-12 | 3 IT-Overall | 2 | 3 | #####    | ##### |
| 1 IT | 2020-12 | 3 IT-Overall | 2 | 4 | #####    | ##### |
| 1 IT | 2020-12 | 3 IT-Overall | 2 | 5 | #####    | ##### |
| 1 IT | 2020-12 | 3 IT-Overall | 3 | 1 | #####    | ##### |
| 1 IT | 2020-12 | 3 IT-Overall | 3 | 2 | #####    | ##### |
| 1 IT | 2020-12 | 3 IT-Overall | 3 | 3 | #####    | ##### |
| 1 IT | 2020-12 | 3 IT-Overall | 3 | 4 | 0.023815 | ##### |
| 1 IT | 2020-12 | 3 IT-Overall | 3 | 5 | #####    | ##### |
| 1 IT | 2020-12 | 3 IT-South   | 1 | 1 | #####    | ##### |
| 1 IT | 2020-12 | 3 IT-South   | 1 | 2 | #####    | ##### |
| 1 IT | 2020-12 | 3 IT-South   | 1 | 3 | #####    | ##### |
| 1 IT | 2020-12 | 3 IT-South   | 1 | 4 | 0        | 0     |
| 1 IT | 2020-12 | 3 IT-South   | 1 | 5 | 0        | 0     |
| 1 IT | 2020-12 | 3 IT-South   | 2 | 1 | #####    | ##### |
| 1 IT | 2020-12 | 3 IT-South   | 2 | 2 | 0        | 0     |
| 1 IT | 2020-12 | 3 IT-South   | 2 | 3 | #####    | ##### |
| 1 IT | 2020-12 | 3 IT-South   | 2 | 4 | 0        | 0     |
| 1 IT | 2020-12 | 3 IT-South   | 2 | 5 | 0        | 0     |
| 1 IT | 2020-12 | 3 IT-South   | 3 | 1 | #####    | ##### |
| 1 IT | 2020-12 | 3 IT-South   | 3 | 2 | #####    | ##### |
| 1 IT | 2020-12 | 3 IT-South   | 3 | 3 | 0        | 0     |
| 1 IT | 2020-12 | 3 IT-South   | 3 | 4 | 0        | 0     |
| 1 IT | 2020-12 | 3 IT-South   | 3 | 5 | 0        | 0     |
| 1 IT | 2020-12 | 4 IT-Central | 1 | 1 | #####    | ##### |
| 1 IT | 2020-12 | 4 IT-Central | 1 | 2 | #####    | ##### |
| 1 IT | 2020-12 | 4 IT-Central | 1 | 3 | #####    | ##### |
| 1 IT | 2020-12 | 4 IT-Central | 1 | 4 | #####    | ##### |
| 1 IT | 2020-12 | 4 IT-Central | 1 | 5 | #####    | ##### |
| 1 IT | 2020-12 | 4 IT-Central | 2 | 1 | #####    | ##### |
| 1 IT | 2020-12 | 4 IT-Central | 2 | 2 | #####    | ##### |
| 1 IT | 2020-12 | 4 IT-Central | 2 | 3 | #####    | ##### |
| 1 IT | 2020-12 | 4 IT-Central | 2 | 4 | 0.09375  | ##### |
| 1 IT | 2020-12 | 4 IT-Central | 2 | 5 | #####    | ##### |
| 1 IT | 2020-12 | 4 IT-Central | 3 | 1 | #####    | ##### |
| 1 IT | 2020-12 | 4 IT-Central | 3 | 2 | #####    | ##### |
| 1 IT | 2020-12 | 4 IT-Central | 3 | 3 | #####    | ##### |
| 1 IT | 2020-12 | 4 IT-Central | 3 | 4 | 1.37037  | ##### |
| 1 IT | 2020-12 | 4 IT-Central | 3 | 5 | 0        | 0     |
| 1 IT | 2020-12 | 4 IT-Insular | 1 | 1 | #####    | ##### |
| 1 IT | 2020-12 | 4 IT-Insular | 1 | 2 | #####    | ##### |

|    |      |         |                |   |   |          |          |  |
|----|------|---------|----------------|---|---|----------|----------|--|
| 1  |      |         |                |   |   |          |          |  |
| 2  |      |         |                |   |   |          |          |  |
| 3  | 1 IT | 2020-12 | 4 IT-Insular   | 1 | 3 | #####    | #####    |  |
| 4  | 1 IT | 2020-12 | 4 IT-Insular   | 1 | 4 | 1.178883 | #####    |  |
| 5  | 1 IT | 2020-12 | 4 IT-Insular   | 1 | 5 | #####    | #####    |  |
| 6  | 1 IT | 2020-12 | 4 IT-Insular   | 2 | 1 | #####    | #####    |  |
| 7  | 1 IT | 2020-12 | 4 IT-Insular   | 2 | 2 | 0        | 0        |  |
| 8  | 1 IT | 2020-12 | 4 IT-Insular   | 2 | 3 | 0        | 0        |  |
| 9  | 1 IT | 2020-12 | 4 IT-Insular   | 2 | 4 | 0.45     | #####    |  |
| 10 | 1 IT | 2020-12 | 4 IT-Insular   | 2 | 5 | #####    | #####    |  |
| 11 | 1 IT | 2020-12 | 4 IT-Insular   | 3 | 1 | 1.009213 | #####    |  |
| 12 | 1 IT | 2020-12 | 4 IT-Insular   | 3 | 2 | 1.545455 | 1.086148 |  |
| 13 | 1 IT | 2020-12 | 4 IT-Insular   | 3 | 3 | 1.238095 | #####    |  |
| 14 | 1 IT | 2020-12 | 4 IT-Insular   | 3 | 4 | 1.692308 | #####    |  |
| 15 | 1 IT | 2020-12 | 4 IT-Insular   | 3 | 5 | 0        | 0        |  |
| 16 | 1 IT | 2020-12 | 4 IT-Northeast | 1 | 1 | #####    | #####    |  |
| 17 | 1 IT | 2020-12 | 4 IT-Northeast | 1 | 2 | #####    | #####    |  |
| 18 | 1 IT | 2020-12 | 4 IT-Northeast | 1 | 3 | 1.042875 | #####    |  |
| 19 | 1 IT | 2020-12 | 4 IT-Northeast | 1 | 4 | #####    | #####    |  |
| 20 | 1 IT | 2020-12 | 4 IT-Northeast | 1 | 5 | 0        | 0        |  |
| 21 | 1 IT | 2020-12 | 4 IT-Northeast | 2 | 1 | #####    | #####    |  |
| 22 | 1 IT | 2020-12 | 4 IT-Northeast | 2 | 2 | #####    | #####    |  |
| 23 | 1 IT | 2020-12 | 4 IT-Northeast | 2 | 3 | #####    | #####    |  |
| 24 | 1 IT | 2020-12 | 4 IT-Northeast | 2 | 4 | #####    | #####    |  |
| 25 | 1 IT | 2020-12 | 4 IT-Northeast | 2 | 5 | 0        | 0        |  |
| 26 | 1 IT | 2020-12 | 4 IT-Northeast | 3 | 1 | #####    | #####    |  |
| 27 | 1 IT | 2020-12 | 4 IT-Northeast | 3 | 2 | 1.434783 | #####    |  |
| 28 | 1 IT | 2020-12 | 4 IT-Northeast | 3 | 3 | 1.146341 | #####    |  |
| 29 | 1 IT | 2020-12 | 4 IT-Northeast | 3 | 4 | #####    | #####    |  |
| 30 | 1 IT | 2020-12 | 4 IT-Northeast | 3 | 5 | 0        | 0        |  |
| 31 | 1 IT | 2020-12 | 4 IT-Northeast | 3 | 1 | #####    | #####    |  |
| 32 | 1 IT | 2020-12 | 4 IT-Northeast | 1 | 2 | #####    | #####    |  |
| 33 | 1 IT | 2020-12 | 4 IT-Northeast | 1 | 3 | 1.381176 | #####    |  |
| 34 | 1 IT | 2020-12 | 4 IT-Northeast | 1 | 4 | #####    | #####    |  |
| 35 | 1 IT | 2020-12 | 4 IT-Northeast | 1 | 5 | 0        | 0        |  |
| 36 | 1 IT | 2020-12 | 4 IT-Northeast | 2 | 1 | #####    | #####    |  |
| 37 | 1 IT | 2020-12 | 4 IT-Northeast | 2 | 2 | #####    | #####    |  |
| 38 | 1 IT | 2020-12 | 4 IT-Northeast | 2 | 3 | #####    | #####    |  |
| 39 | 1 IT | 2020-12 | 4 IT-Northeast | 2 | 4 | #####    | #####    |  |
| 40 | 1 IT | 2020-12 | 4 IT-Northeast | 2 | 5 | 0        | 0        |  |
| 41 | 1 IT | 2020-12 | 4 IT-Northeast | 3 | 1 | #####    | #####    |  |
| 42 | 1 IT | 2020-12 | 4 IT-Northeast | 3 | 2 | #####    | #####    |  |
| 43 | 1 IT | 2020-12 | 4 IT-Northeast | 3 | 3 | 2        | #####    |  |
| 44 | 1 IT | 2020-12 | 4 IT-Northeast | 3 | 4 | #####    | #####    |  |
| 45 | 1 IT | 2020-12 | 4 IT-Northeast | 3 | 5 | 0        | 0        |  |
| 46 | 1 IT | 2020-12 | 4 IT-Overall   | 1 | 1 | #####    | #####    |  |
| 47 | 1 IT | 2020-12 | 4 IT-Overall   | 1 | 2 | #####    | #####    |  |
| 48 | 1 IT | 2020-12 | 4 IT-Overall   | 1 | 3 | 1.157113 | #####    |  |
| 49 | 1 IT | 2020-12 | 4 IT-Overall   | 1 | 4 | #####    | #####    |  |
| 50 | 1 IT | 2020-12 | 4 IT-Overall   | 1 | 5 | #####    | #####    |  |
| 51 | 1 IT | 2020-12 | 4 IT-Overall   | 2 | 1 | #####    | #####    |  |
| 52 | 1 IT | 2020-12 | 4 IT-Overall   | 2 | 2 | #####    | #####    |  |
| 53 | 1 IT | 2020-12 | 4 IT-Overall   | 2 | 3 | #####    | #####    |  |
| 54 | 1 IT | 2020-12 | 4 IT-Overall   | 2 | 4 | #####    | #####    |  |
| 55 | 1 IT | 2020-12 | 4 IT-Overall   | 2 | 5 | #####    | #####    |  |
| 56 | 1 IT | 2020-12 | 4 IT-Overall   | 3 | 1 | #####    | #####    |  |
| 57 | 1 IT | 2020-12 | 4 IT-Overall   | 3 | 2 | #####    | #####    |  |
| 58 | 1 IT | 2020-12 | 4 IT-Overall   | 3 | 3 | 1.59205  | #####    |  |
| 59 | 1 IT | 2020-12 | 4 IT-Overall   | 3 | 3 | 1.59205  | #####    |  |
| 60 | 1 IT | 2020-12 | 4 IT-Overall   | 3 | 3 | 1.59205  | #####    |  |

1  
2  
3  
4  
5  
6  
7  
8  
9  
10  
11  
12  
13  
14  
15  
16  
17  
18  
19  
20  
21  
22  
23  
24  
25  
26  
27  
28  
29  
30  
31  
32  
33  
34  
35  
36  
37  
38  
39  
40  
41  
42  
43  
44  
45  
46  
47  
48  
49  
50  
51  
52  
53  
54  
55  
56  
57  
58  
59  
60

|      |         |                |   |   |          |          |
|------|---------|----------------|---|---|----------|----------|
| 1 IT | 2020-12 | 4 IT-Overall   | 3 | 4 | #####    | #####    |
| 1 IT | 2020-12 | 4 IT-Overall   | 3 | 5 | 0        | 0        |
| 1 IT | 2020-12 | 4 IT-South     | 1 | 1 | #####    | #####    |
| 1 IT | 2020-12 | 4 IT-South     | 1 | 2 | 0        | 0        |
| 1 IT | 2020-12 | 4 IT-South     | 1 | 3 | 1.502814 | #####    |
| 1 IT | 2020-12 | 4 IT-South     | 1 | 4 | #####    | #####    |
| 1 IT | 2020-12 | 4 IT-South     | 1 | 5 | 0        | 0        |
| 1 IT | 2020-12 | 4 IT-South     | 2 | 1 | #####    | #####    |
| 1 IT | 2020-12 | 4 IT-South     | 2 | 2 | 0        | 0        |
| 1 IT | 2020-12 | 4 IT-South     | 2 | 3 | #####    | #####    |
| 1 IT | 2020-12 | 4 IT-South     | 2 | 4 | #####    | #####    |
| 1 IT | 2020-12 | 4 IT-South     | 2 | 5 | 0        | 0        |
| 1 IT | 2020-12 | 4 IT-South     | 3 | 1 | #####    | #####    |
| 1 IT | 2020-12 | 4 IT-South     | 3 | 2 | 0        | 0        |
| 1 IT | 2020-12 | 4 IT-South     | 3 | 3 | 2.3      | 1.245272 |
| 1 IT | 2020-12 | 4 IT-South     | 3 | 4 | 0        | 0        |
| 1 IT | 2020-12 | 4 IT-South     | 3 | 5 | 0        | 0        |
| 1 IT | 2020-12 | 5 IT-Central   | 1 | 1 | #####    | #####    |
| 1 IT | 2020-12 | 5 IT-Central   | 1 | 2 | #####    | #####    |
| 1 IT | 2020-12 | 5 IT-Central   | 1 | 3 | #####    | #####    |
| 1 IT | 2020-12 | 5 IT-Central   | 1 | 4 | #####    | #####    |
| 1 IT | 2020-12 | 5 IT-Central   | 1 | 5 | #####    | #####    |
| 1 IT | 2020-12 | 5 IT-Central   | 2 | 1 | #####    | #####    |
| 1 IT | 2020-12 | 5 IT-Central   | 2 | 2 | #####    | #####    |
| 1 IT | 2020-12 | 5 IT-Central   | 2 | 3 | #####    | #####    |
| 1 IT | 2020-12 | 5 IT-Central   | 2 | 4 | 0.625    | #####    |
| 1 IT | 2020-12 | 5 IT-Central   | 2 | 5 | #####    | #####    |
| 1 IT | 2020-12 | 5 IT-Central   | 3 | 1 | #####    | #####    |
| 1 IT | 2020-12 | 5 IT-Central   | 3 | 2 | #####    | #####    |
| 1 IT | 2020-12 | 5 IT-Central   | 3 | 3 | #####    | #####    |
| 1 IT | 2020-12 | 5 IT-Central   | 3 | 4 | #####    | #####    |
| 1 IT | 2020-12 | 5 IT-Central   | 3 | 5 | 1.266667 | #####    |
| 1 IT | 2020-12 | 5 IT-Insular   | 1 | 1 | #####    | #####    |
| 1 IT | 2020-12 | 5 IT-Insular   | 1 | 2 | #####    | #####    |
| 1 IT | 2020-12 | 5 IT-Insular   | 1 | 3 | #####    | #####    |
| 1 IT | 2020-12 | 5 IT-Insular   | 1 | 4 | #####    | #####    |
| 1 IT | 2020-12 | 5 IT-Insular   | 1 | 5 | #####    | #####    |
| 1 IT | 2020-12 | 5 IT-Insular   | 2 | 1 | #####    | #####    |
| 1 IT | 2020-12 | 5 IT-Insular   | 2 | 2 | #####    | #####    |
| 1 IT | 2020-12 | 5 IT-Insular   | 2 | 3 | 1.15     | #####    |
| 1 IT | 2020-12 | 5 IT-Insular   | 2 | 4 | 0.15     | #####    |
| 1 IT | 2020-12 | 5 IT-Insular   | 2 | 5 | #####    | #####    |
| 1 IT | 2020-12 | 5 IT-Insular   | 3 | 1 | #####    | #####    |
| 1 IT | 2020-12 | 5 IT-Insular   | 3 | 2 | #####    | #####    |
| 1 IT | 2020-12 | 5 IT-Insular   | 3 | 3 | #####    | #####    |
| 1 IT | 2020-12 | 5 IT-Insular   | 3 | 4 | 1.230769 | #####    |
| 1 IT | 2020-12 | 5 IT-Insular   | 3 | 5 | 0.125    | #####    |
| 1 IT | 2020-12 | 5 IT-Northeast | 1 | 1 | #####    | #####    |
| 1 IT | 2020-12 | 5 IT-Northeast | 1 | 2 | #####    | #####    |
| 1 IT | 2020-12 | 5 IT-Northeast | 1 | 3 | #####    | #####    |
| 1 IT | 2020-12 | 5 IT-Northeast | 1 | 4 | #####    | #####    |
| 1 IT | 2020-12 | 5 IT-Northeast | 1 | 5 | #####    | #####    |
| 1 IT | 2020-12 | 5 IT-Northeast | 2 | 1 | #####    | #####    |
| 1 IT | 2020-12 | 5 IT-Northeast | 2 | 2 | #####    | #####    |
| 1 IT | 2020-12 | 5 IT-Northeast | 2 | 3 | 1.179104 | #####    |
| 1 IT | 2020-12 | 5 IT-Northeast | 2 | 4 | #####    | #####    |

|    |      |         |                |   |   |          |       |
|----|------|---------|----------------|---|---|----------|-------|
| 1  |      |         |                |   |   |          |       |
| 2  |      |         |                |   |   |          |       |
| 3  | 1 IT | 2020-12 | 5 IT-Northeast | 2 | 5 | #####    | ##### |
| 4  | 1 IT | 2020-12 | 5 IT-Northeast | 3 | 1 | 1.035751 | ##### |
| 5  | 1 IT | 2020-12 | 5 IT-Northeast | 3 | 2 | #####    | ##### |
| 6  | 1 IT | 2020-12 | 5 IT-Northeast | 3 | 3 | #####    | ##### |
| 7  | 1 IT | 2020-12 | 5 IT-Northeast | 3 | 4 | 1.238095 | ##### |
| 8  | 1 IT | 2020-12 | 5 IT-Northeast | 3 | 5 | 1.6      | ##### |
| 9  | 1 IT | 2020-12 | 5 IT-Northwest | 1 | 1 | #####    | ##### |
| 10 | 1 IT | 2020-12 | 5 IT-Northwest | 1 | 2 | #####    | ##### |
| 11 | 1 IT | 2020-12 | 5 IT-Northwest | 1 | 3 | #####    | ##### |
| 12 | 1 IT | 2020-12 | 5 IT-Northwest | 1 | 4 | #####    | ##### |
| 13 | 1 IT | 2020-12 | 5 IT-Northwest | 1 | 5 | #####    | ##### |
| 14 | 1 IT | 2020-12 | 5 IT-Northwest | 2 | 1 | #####    | ##### |
| 15 | 1 IT | 2020-12 | 5 IT-Northwest | 2 | 2 | #####    | ##### |
| 16 | 1 IT | 2020-12 | 5 IT-Northwest | 2 | 3 | 0.375    | ##### |
| 17 | 1 IT | 2020-12 | 5 IT-Northwest | 2 | 4 | 0.375    | ##### |
| 18 | 1 IT | 2020-12 | 5 IT-Northwest | 2 | 5 | #####    | ##### |
| 19 | 1 IT | 2020-12 | 5 IT-Northwest | 3 | 1 | #####    | ##### |
| 20 | 1 IT | 2020-12 | 5 IT-Northwest | 3 | 2 | 0.65     | ##### |
| 21 | 1 IT | 2020-12 | 5 IT-Northwest | 3 | 3 | #####    | ##### |
| 22 | 1 IT | 2020-12 | 5 IT-Northwest | 3 | 4 | 1.157895 | ##### |
| 23 | 1 IT | 2020-12 | 5 IT-Northwest | 3 | 5 | 0.8      | ##### |
| 24 | 1 IT | 2020-12 | 5 IT-Overall   | 1 | 1 | #####    | ##### |
| 25 | 1 IT | 2020-12 | 5 IT-Overall   | 1 | 2 | #####    | ##### |
| 26 | 1 IT | 2020-12 | 5 IT-Overall   | 1 | 3 | #####    | ##### |
| 27 | 1 IT | 2020-12 | 5 IT-Overall   | 1 | 4 | #####    | ##### |
| 28 | 1 IT | 2020-12 | 5 IT-Overall   | 1 | 5 | #####    | ##### |
| 29 | 1 IT | 2020-12 | 5 IT-Overall   | 2 | 1 | #####    | ##### |
| 30 | 1 IT | 2020-12 | 5 IT-Overall   | 2 | 2 | #####    | ##### |
| 31 | 1 IT | 2020-12 | 5 IT-Overall   | 2 | 3 | #####    | ##### |
| 32 | 1 IT | 2020-12 | 5 IT-Overall   | 2 | 4 | #####    | ##### |
| 33 | 1 IT | 2020-12 | 5 IT-Overall   | 2 | 5 | #####    | ##### |
| 34 | 1 IT | 2020-12 | 5 IT-Overall   | 3 | 1 | #####    | ##### |
| 35 | 1 IT | 2020-12 | 5 IT-Overall   | 3 | 2 | #####    | ##### |
| 36 | 1 IT | 2020-12 | 5 IT-Overall   | 3 | 3 | #####    | ##### |
| 37 | 1 IT | 2020-12 | 5 IT-Overall   | 3 | 4 | 1.313675 | ##### |
| 38 | 1 IT | 2020-12 | 5 IT-Overall   | 3 | 5 | #####    | ##### |
| 39 | 1 IT | 2020-12 | 5 IT-South     | 1 | 1 | #####    | ##### |
| 40 | 1 IT | 2020-12 | 5 IT-South     | 1 | 2 | 1.087871 | ##### |
| 41 | 1 IT | 2020-12 | 5 IT-South     | 1 | 3 | #####    | ##### |
| 42 | 1 IT | 2020-12 | 5 IT-South     | 1 | 4 | 1.193205 | ##### |
| 43 | 1 IT | 2020-12 | 5 IT-South     | 1 | 5 | #####    | ##### |
| 44 | 1 IT | 2020-12 | 5 IT-South     | 2 | 1 | #####    | ##### |
| 45 | 1 IT | 2020-12 | 5 IT-South     | 2 | 2 | #####    | ##### |
| 46 | 1 IT | 2020-12 | 5 IT-South     | 2 | 3 | #####    | ##### |
| 47 | 1 IT | 2020-12 | 5 IT-South     | 2 | 4 | #####    | ##### |
| 48 | 1 IT | 2020-12 | 5 IT-South     | 2 | 5 | #####    | ##### |
| 49 | 1 IT | 2020-12 | 5 IT-South     | 3 | 1 | 1.043394 | ##### |
| 50 | 1 IT | 2020-12 | 5 IT-South     | 3 | 2 | 1.529412 | ##### |
| 51 | 1 IT | 2020-12 | 5 IT-South     | 3 | 3 | 0.4      | ##### |
| 52 | 1 IT | 2020-12 | 5 IT-South     | 3 | 4 | 2.125    | ##### |
| 53 | 1 IT | 2020-12 | 5 IT-South     | 3 | 5 | #####    | ##### |
| 54 | 1 IT | 2020-12 | 5 IT-South     | 3 | 5 | #####    | ##### |
| 55 | 1 IT | 2020-13 | 1 IT-Central   | 1 | 1 | 3.181968 | ##### |
| 56 | 1 IT | 2020-13 | 1 IT-Central   | 1 | 2 | 3.962705 | ##### |
| 57 | 1 IT | 2020-13 | 1 IT-Central   | 1 | 3 | 4.016758 | ##### |
| 58 | 1 IT | 2020-13 | 1 IT-Central   | 1 | 4 | 3.286283 | ##### |
| 59 | 1 IT | 2020-13 | 1 IT-Central   | 1 | 5 | 1.663103 | ##### |
| 60 | 1 IT | 2020-13 | 1 IT-Central   | 1 | 5 | 1.663103 | ##### |

1  
2  
3  
4  
5  
6  
7  
8  
9  
10  
11  
12  
13  
14  
15  
16  
17  
18  
19  
20  
21  
22  
23  
24  
25  
26  
27  
28  
29  
30  
31  
32  
33  
34  
35  
36  
37  
38  
39  
40  
41  
42  
43  
44  
45  
46  
47  
48  
49  
50  
51  
52  
53  
54  
55  
56  
57  
58  
59  
60

|      |         |                |   |   |          |          |
|------|---------|----------------|---|---|----------|----------|
| 1 IT | 2020-13 | 1 IT-Central   | 2 | 1 | 2.890707 | #####    |
| 1 IT | 2020-13 | 1 IT-Central   | 2 | 2 | 3.8      | #####    |
| 1 IT | 2020-13 | 1 IT-Central   | 2 | 3 | 3.084034 | #####    |
| 1 IT | 2020-13 | 1 IT-Central   | 2 | 4 | 3.054348 | #####    |
| 1 IT | 2020-13 | 1 IT-Central   | 2 | 5 | 1.928571 | #####    |
| 1 IT | 2020-13 | 1 IT-Central   | 3 | 1 | 3.534392 | #####    |
| 1 IT | 2020-13 | 1 IT-Central   | 3 | 2 | 4.08     | #####    |
| 1 IT | 2020-13 | 1 IT-Central   | 3 | 3 | 5.333333 | 1.011574 |
| 1 IT | 2020-13 | 1 IT-Central   | 3 | 4 | 3.638889 | #####    |
| 1 IT | 2020-13 | 1 IT-Central   | 3 | 5 | 1.4      | #####    |
| 1 IT | 2020-13 | 1 IT-Insular   | 1 | 1 | 3.022397 | #####    |
| 1 IT | 2020-13 | 1 IT-Insular   | 1 | 2 | 4.659341 | 1.53759  |
| 1 IT | 2020-13 | 1 IT-Insular   | 1 | 3 | 3.466338 | #####    |
| 1 IT | 2020-13 | 1 IT-Insular   | 1 | 4 | 2.756147 | #####    |
| 1 IT | 2020-13 | 1 IT-Insular   | 1 | 5 | 1.878659 | #####    |
| 1 IT | 2020-13 | 1 IT-Insular   | 2 | 1 | 2.765695 | #####    |
| 1 IT | 2020-13 | 1 IT-Insular   | 2 | 2 | 2.863636 | #####    |
| 1 IT | 2020-13 | 1 IT-Insular   | 2 | 3 | 3.442623 | #####    |
| 1 IT | 2020-13 | 1 IT-Insular   | 2 | 4 | 2.567568 | #####    |
| 1 IT | 2020-13 | 1 IT-Insular   | 2 | 5 | 2.133333 | #####    |
| 1 IT | 2020-13 | 1 IT-Insular   | 3 | 1 | 3.49179  | #####    |
| 1 IT | 2020-13 | 1 IT-Insular   | 3 | 2 | 7        | 3.325205 |
| 1 IT | 2020-13 | 1 IT-Insular   | 3 | 3 | 3.5      | 1.089441 |
| 1 IT | 2020-13 | 1 IT-Insular   | 3 | 4 | 3.111111 | #####    |
| 1 IT | 2020-13 | 1 IT-Insular   | 3 | 5 | 1        | #####    |
| 1 IT | 2020-13 | 1 IT-Northeast | 1 | 1 | 3.300106 | #####    |
| 1 IT | 2020-13 | 1 IT-Northeast | 1 | 2 | 3.530643 | #####    |
| 1 IT | 2020-13 | 1 IT-Northeast | 1 | 3 | 4.162877 | #####    |
| 1 IT | 2020-13 | 1 IT-Northeast | 1 | 4 | 3.314593 | #####    |
| 1 IT | 2020-13 | 1 IT-Northeast | 1 | 5 | 1.95665  | #####    |
| 1 IT | 2020-13 | 1 IT-Northeast | 2 | 1 | 3.257173 | #####    |
| 1 IT | 2020-13 | 1 IT-Northeast | 2 | 2 | 3.333333 | #####    |
| 1 IT | 2020-13 | 1 IT-Northeast | 2 | 3 | 4.013605 | #####    |
| 1 IT | 2020-13 | 1 IT-Northeast | 2 | 4 | 3.66087  | #####    |
| 1 IT | 2020-13 | 1 IT-Northeast | 2 | 5 | 1.714286 | #####    |
| 1 IT | 2020-13 | 1 IT-Northeast | 3 | 1 | 3.351879 | #####    |
| 1 IT | 2020-13 | 1 IT-Northeast | 3 | 2 | 3.703704 | #####    |
| 1 IT | 2020-13 | 1 IT-Northeast | 3 | 3 | 4.343284 | #####    |
| 1 IT | 2020-13 | 1 IT-Northeast | 3 | 4 | 2.938462 | #####    |
| 1 IT | 2020-13 | 1 IT-Northeast | 3 | 5 | 2.388889 | #####    |
| 1 IT | 2020-13 | 1 IT-Northwest | 1 | 1 | 3.221893 | #####    |
| 1 IT | 2020-13 | 1 IT-Northwest | 1 | 2 | 3.382951 | #####    |
| 1 IT | 2020-13 | 1 IT-Northwest | 1 | 3 | 4.067756 | #####    |
| 1 IT | 2020-13 | 1 IT-Northwest | 1 | 4 | 3.276776 | #####    |
| 1 IT | 2020-13 | 1 IT-Northwest | 1 | 5 | 1.56     | #####    |
| 1 IT | 2020-13 | 1 IT-Northwest | 2 | 1 | 2.675049 | #####    |
| 1 IT | 2020-13 | 1 IT-Northwest | 2 | 2 | 3.506329 | #####    |
| 1 IT | 2020-13 | 1 IT-Northwest | 2 | 3 | 3.347418 | #####    |
| 1 IT | 2020-13 | 1 IT-Northwest | 2 | 4 | 2.656716 | #####    |
| 1 IT | 2020-13 | 1 IT-Northwest | 2 | 5 | 1.511111 | #####    |
| 1 IT | 2020-13 | 1 IT-Northwest | 3 | 1 | 3.946293 | #####    |
| 1 IT | 2020-13 | 1 IT-Northwest | 3 | 2 | 3.258065 | #####    |
| 1 IT | 2020-13 | 1 IT-Northwest | 3 | 3 | 4.823529 | #####    |
| 1 IT | 2020-13 | 1 IT-Northwest | 3 | 4 | 4.079365 | #####    |
| 1 IT | 2020-13 | 1 IT-Northwest | 3 | 5 | 1.6875   | #####    |
| 1 IT | 2020-13 | 1 IT-Overall   | 1 | 1 | 3.090869 | #####    |



|    |      |         |              |   |   |          |       |  |
|----|------|---------|--------------|---|---|----------|-------|--|
| 1  |      |         |              |   |   |          |       |  |
| 2  |      |         |              |   |   |          |       |  |
| 3  | 1 IT | 2020-13 | 1 IT-Overall | 1 | 2 | 3.748717 | ##### |  |
| 4  | 1 IT | 2020-13 | 1 IT-Overall | 1 | 3 | 3.699806 | ##### |  |
| 5  | 1 IT | 2020-13 | 1 IT-Overall | 1 | 4 | 3.119516 | ##### |  |
| 6  | 1 IT | 2020-13 | 1 IT-Overall | 1 | 5 | 1.633739 | ##### |  |
| 7  | 1 IT | 2020-13 | 1 IT-Overall | 2 | 1 | 2.856162 | ##### |  |
| 8  | 1 IT | 2020-13 | 1 IT-Overall | 2 | 2 | 3.618518 | ##### |  |
| 9  | 1 IT | 2020-13 | 1 IT-Overall | 2 | 3 | 3.366087 | ##### |  |
| 10 | 1 IT | 2020-13 | 1 IT-Overall | 2 | 4 | 2.97422  | ##### |  |
| 11 | 1 IT | 2020-13 | 1 IT-Overall | 2 | 5 | 1.627744 | ##### |  |
| 12 | 1 IT | 2020-13 | 1 IT-Overall | 3 | 1 | 3.389832 | ##### |  |
| 13 | 1 IT | 2020-13 | 1 IT-Overall | 3 | 2 | 3.871623 | ##### |  |
| 14 | 1 IT | 2020-13 | 1 IT-Overall | 3 | 3 | 4.067614 | ##### |  |
| 15 | 1 IT | 2020-13 | 1 IT-Overall | 3 | 4 | 3.315695 | ##### |  |
| 16 | 1 IT | 2020-13 | 1 IT-Overall | 3 | 5 | 1.644389 | ##### |  |
| 17 | 1 IT | 2020-13 | 1 IT-South   | 1 | 1 | 2.74077  | ##### |  |
| 18 | 1 IT | 2020-13 | 1 IT-South   | 1 | 2 | 3.82875  | ##### |  |
| 19 | 1 IT | 2020-13 | 1 IT-South   | 1 | 3 | 3.034751 | ##### |  |
| 20 | 1 IT | 2020-13 | 1 IT-South   | 1 | 4 | 2.740342 | ##### |  |
| 21 | 1 IT | 2020-13 | 1 IT-South   | 1 | 5 | 1.236249 | ##### |  |
| 22 | 1 IT | 2020-13 | 1 IT-South   | 2 | 1 | 2.737735 | ##### |  |
| 23 | 1 IT | 2020-13 | 1 IT-South   | 2 | 2 | 4.103448 | ##### |  |
| 24 | 1 IT | 2020-13 | 1 IT-South   | 2 | 3 | 3.102273 | ##### |  |
| 25 | 1 IT | 2020-13 | 1 IT-South   | 2 | 4 | 2.821429 | ##### |  |
| 26 | 1 IT | 2020-13 | 1 IT-South   | 2 | 5 | 1.125    | ##### |  |
| 27 | 1 IT | 2020-13 | 1 IT-South   | 3 | 1 | 2.744316 | ##### |  |
| 28 | 1 IT | 2020-13 | 1 IT-South   | 3 | 2 | 3.538462 | ##### |  |
| 29 | 1 IT | 2020-13 | 1 IT-South   | 3 | 3 | 2.975    | ##### |  |
| 30 | 1 IT | 2020-13 | 1 IT-South   | 3 | 4 | 2.625    | ##### |  |
| 31 | 1 IT | 2020-13 | 1 IT-South   | 3 | 5 | 1.428571 | ##### |  |
| 32 | 1 IT | 2020-13 | 2 IT-Central | 1 | 1 | 1.754361 | ##### |  |
| 33 | 1 IT | 2020-13 | 2 IT-Central | 1 | 2 | 2.929976 | ##### |  |
| 34 | 1 IT | 2020-13 | 2 IT-Central | 1 | 3 | 1.925537 | ##### |  |
| 35 | 1 IT | 2020-13 | 2 IT-Central | 1 | 4 | 1.703101 | ##### |  |
| 36 | 1 IT | 2020-13 | 2 IT-Central | 1 | 5 | #####    | ##### |  |
| 37 | 1 IT | 2020-13 | 2 IT-Central | 2 | 1 | 1.762702 | ##### |  |
| 38 | 1 IT | 2020-13 | 2 IT-Central | 2 | 2 | 2.444444 | ##### |  |
| 39 | 1 IT | 2020-13 | 2 IT-Central | 2 | 3 | 2.023622 | ##### |  |
| 40 | 1 IT | 2020-13 | 2 IT-Central | 2 | 4 | 1.806452 | ##### |  |
| 41 | 1 IT | 2020-13 | 2 IT-Central | 2 | 5 | 1        | ##### |  |
| 42 | 1 IT | 2020-13 | 2 IT-Central | 3 | 1 | 1.744199 | ##### |  |
| 43 | 1 IT | 2020-13 | 2 IT-Central | 3 | 2 | 3.28     | ##### |  |
| 44 | 1 IT | 2020-13 | 2 IT-Central | 3 | 3 | 1.777778 | ##### |  |
| 45 | 1 IT | 2020-13 | 2 IT-Central | 3 | 4 | 1.552632 | ##### |  |
| 46 | 1 IT | 2020-13 | 2 IT-Central | 3 | 5 | 0.95     | ##### |  |
| 47 | 1 IT | 2020-13 | 2 IT-Insular | 1 | 1 | 1.772551 | ##### |  |
| 48 | 1 IT | 2020-13 | 2 IT-Insular | 1 | 2 | 2.920081 | ##### |  |
| 49 | 1 IT | 2020-13 | 2 IT-Insular | 1 | 3 | 2.090023 | ##### |  |
| 50 | 1 IT | 2020-13 | 2 IT-Insular | 1 | 4 | 1.443098 | ##### |  |
| 51 | 1 IT | 2020-13 | 2 IT-Insular | 1 | 5 | 1.155057 | ##### |  |
| 52 | 1 IT | 2020-13 | 2 IT-Insular | 2 | 1 | 1.748199 | ##### |  |
| 53 | 1 IT | 2020-13 | 2 IT-Insular | 2 | 2 | 2.73913  | ##### |  |
| 54 | 1 IT | 2020-13 | 2 IT-Insular | 2 | 3 | 2.306452 | ##### |  |
| 55 | 1 IT | 2020-13 | 2 IT-Insular | 2 | 4 | 1.324324 | ##### |  |
| 56 | 1 IT | 2020-13 | 2 IT-Insular | 2 | 5 | 1.2      | ##### |  |
| 57 | 1 IT | 2020-13 | 2 IT-Insular | 3 | 1 | 1.817504 | ##### |  |
| 58 | 1 IT | 2020-13 | 2 IT-Insular | 3 | 2 | 3.166667 | ##### |  |
| 59 | 1 IT | 2020-13 | 2 IT-Insular | 3 | 2 | 3.166667 | ##### |  |
| 60 | 1 IT | 2020-13 | 2 IT-Insular | 3 | 2 | 3.166667 | ##### |  |

1  
2  
3  
4  
5  
6  
7  
8  
9  
10  
11  
12  
13  
14  
15  
16  
17  
18  
19  
20  
21  
22  
23  
24  
25  
26  
27  
28  
29  
30  
31  
32  
33  
34  
35  
36  
37  
38  
39  
40  
41  
42  
43  
44  
45  
46  
47  
48  
49  
50  
51  
52  
53  
54  
55  
56  
57  
58  
59  
60

|      |         |                |   |   |          |       |
|------|---------|----------------|---|---|----------|-------|
| 1 IT | 2020-13 | 2 IT-Insular   | 3 | 3 | 1.777778 | ##### |
| 1 IT | 2020-13 | 2 IT-Insular   | 3 | 4 | 1.666667 | ##### |
| 1 IT | 2020-13 | 2 IT-Insular   | 3 | 5 | 1        | ##### |
| 1 IT | 2020-13 | 2 IT-Northeast | 1 | 1 | 1.609189 | ##### |
| 1 IT | 2020-13 | 2 IT-Northeast | 1 | 2 | 2.455687 | ##### |
| 1 IT | 2020-13 | 2 IT-Northeast | 1 | 3 | 1.771403 | ##### |
| 1 IT | 2020-13 | 2 IT-Northeast | 1 | 4 | 1.495443 | ##### |
| 1 IT | 2020-13 | 2 IT-Northeast | 1 | 5 | 1.103103 | ##### |
| 1 IT | 2020-13 | 2 IT-Northeast | 2 | 1 | 1.47528  | ##### |
| 1 IT | 2020-13 | 2 IT-Northeast | 2 | 2 | 2.318841 | ##### |
| 1 IT | 2020-13 | 2 IT-Northeast | 2 | 3 | 1.853333 | ##### |
| 1 IT | 2020-13 | 2 IT-Northeast | 2 | 4 | 1.301724 | ##### |
| 1 IT | 2020-13 | 2 IT-Northeast | 2 | 5 | #####    | ##### |
| 1 IT | 2020-13 | 2 IT-Northeast | 3 | 1 | 1.768622 | ##### |
| 1 IT | 2020-13 | 2 IT-Northeast | 3 | 2 | 2.571429 | ##### |
| 1 IT | 2020-13 | 2 IT-Northeast | 3 | 3 | 1.676056 | ##### |
| 1 IT | 2020-13 | 2 IT-Northeast | 3 | 4 | 1.707692 | ##### |
| 1 IT | 2020-13 | 2 IT-Northeast | 3 | 5 | 1.388889 | ##### |
| 1 IT | 2020-13 | 2 IT-Northwest | 1 | 1 | 1.680177 | ##### |
| 1 IT | 2020-13 | 2 IT-Northwest | 1 | 2 | 2.584115 | ##### |
| 1 IT | 2020-13 | 2 IT-Northwest | 1 | 3 | 1.702472 | ##### |
| 1 IT | 2020-13 | 2 IT-Northwest | 1 | 4 | 1.76081  | ##### |
| 1 IT | 2020-13 | 2 IT-Northwest | 1 | 5 | #####    | ##### |
| 1 IT | 2020-13 | 2 IT-Northwest | 2 | 1 | 1.624339 | ##### |
| 1 IT | 2020-13 | 2 IT-Northwest | 2 | 2 | 2.5875   | ##### |
| 1 IT | 2020-13 | 2 IT-Northwest | 2 | 3 | 1.743119 | ##### |
| 1 IT | 2020-13 | 2 IT-Northwest | 2 | 4 | 1.772059 | ##### |
| 1 IT | 2020-13 | 2 IT-Northwest | 2 | 5 | #####    | ##### |
| 1 IT | 2020-13 | 2 IT-Northwest | 3 | 1 | 1.755149 | ##### |
| 1 IT | 2020-13 | 2 IT-Northwest | 3 | 2 | 2.580645 | ##### |
| 1 IT | 2020-13 | 2 IT-Northwest | 3 | 3 | 1.658824 | ##### |
| 1 IT | 2020-13 | 2 IT-Northwest | 3 | 4 | 1.746032 | ##### |
| 1 IT | 2020-13 | 2 IT-Northwest | 3 | 5 | 1.125    | ##### |
| 1 IT | 2020-13 | 2 IT-Overall   | 1 | 1 | 1.752915 | ##### |
| 1 IT | 2020-13 | 2 IT-Overall   | 1 | 2 | 2.76038  | ##### |
| 1 IT | 2020-13 | 2 IT-Overall   | 1 | 3 | 1.895617 | ##### |
| 1 IT | 2020-13 | 2 IT-Overall   | 1 | 4 | 1.686642 | ##### |
| 1 IT | 2020-13 | 2 IT-Overall   | 1 | 5 | 1.013259 | ##### |
| 1 IT | 2020-13 | 2 IT-Overall   | 2 | 1 | 1.700148 | ##### |
| 1 IT | 2020-13 | 2 IT-Overall   | 2 | 2 | 2.594665 | ##### |
| 1 IT | 2020-13 | 2 IT-Overall   | 2 | 3 | 2.007498 | ##### |
| 1 IT | 2020-13 | 2 IT-Overall   | 2 | 4 | 1.649134 | ##### |
| 1 IT | 2020-13 | 2 IT-Overall   | 2 | 5 | #####    | ##### |
| 1 IT | 2020-13 | 2 IT-Overall   | 3 | 1 | 1.820453 | ##### |
| 1 IT | 2020-13 | 2 IT-Overall   | 3 | 2 | 2.916838 | ##### |
| 1 IT | 2020-13 | 2 IT-Overall   | 3 | 3 | 1.769901 | ##### |
| 1 IT | 2020-13 | 2 IT-Overall   | 3 | 4 | 1.737188 | ##### |
| 1 IT | 2020-13 | 2 IT-Overall   | 3 | 5 | 1.149044 | ##### |
| 1 IT | 2020-13 | 2 IT-South     | 1 | 1 | 1.938347 | ##### |
| 1 IT | 2020-13 | 2 IT-South     | 1 | 2 | 3.003932 | ##### |
| 1 IT | 2020-13 | 2 IT-South     | 1 | 3 | 2.053079 | ##### |
| 1 IT | 2020-13 | 2 IT-South     | 1 | 4 | 1.869343 | ##### |
| 1 IT | 2020-13 | 2 IT-South     | 1 | 5 | 1.025513 | ##### |
| 1 IT | 2020-13 | 2 IT-South     | 2 | 1 | 1.898891 | ##### |
| 1 IT | 2020-13 | 2 IT-South     | 2 | 2 | 2.862069 | ##### |
| 1 IT | 2020-13 | 2 IT-South     | 2 | 3 | 2.222222 | ##### |

|    |      |         |                |   |   |          |       |  |
|----|------|---------|----------------|---|---|----------|-------|--|
| 1  |      |         |                |   |   |          |       |  |
| 2  |      |         |                |   |   |          |       |  |
| 3  | 1 IT | 2020-13 | 2 IT-South     | 2 | 4 | 1.821429 | ##### |  |
| 4  | 1 IT | 2020-13 | 2 IT-South     | 2 | 5 | 0.875    | ##### |  |
| 5  | 1 IT | 2020-13 | 2 IT-South     | 3 | 1 | 1.984817 | ##### |  |
| 6  | 1 IT | 2020-13 | 2 IT-South     | 3 | 2 | 3.153846 | ##### |  |
| 7  | 1 IT | 2020-13 | 2 IT-South     | 3 | 3 | 1.9      | ##### |  |
| 8  | 1 IT | 2020-13 | 2 IT-South     | 3 | 4 | 1.9375   | ##### |  |
| 9  | 1 IT | 2020-13 | 2 IT-South     | 3 | 5 | 1.285714 | ##### |  |
| 10 | 1 IT | 2020-13 | 3 IT-Central   | 1 | 1 | #####    | ##### |  |
| 11 | 1 IT | 2020-13 | 3 IT-Central   | 1 | 2 | #####    | ##### |  |
| 12 | 1 IT | 2020-13 | 3 IT-Central   | 1 | 3 | #####    | ##### |  |
| 13 | 1 IT | 2020-13 | 3 IT-Central   | 1 | 4 | #####    | ##### |  |
| 14 | 1 IT | 2020-13 | 3 IT-Central   | 1 | 5 | 0        | 0     |  |
| 15 | 1 IT | 2020-13 | 3 IT-Central   | 2 | 1 | #####    | ##### |  |
| 16 | 1 IT | 2020-13 | 3 IT-Central   | 2 | 2 | #####    | ##### |  |
| 17 | 1 IT | 2020-13 | 3 IT-Central   | 2 | 3 | 0        | 0     |  |
| 18 | 1 IT | 2020-13 | 3 IT-Central   | 2 | 4 | #####    | ##### |  |
| 19 | 1 IT | 2020-13 | 3 IT-Central   | 2 | 5 | 0        | 0     |  |
| 20 | 1 IT | 2020-13 | 3 IT-Central   | 3 | 1 | #####    | ##### |  |
| 21 | 1 IT | 2020-13 | 3 IT-Central   | 3 | 2 | 0        | 0     |  |
| 22 | 1 IT | 2020-13 | 3 IT-Central   | 3 | 3 | #####    | ##### |  |
| 23 | 1 IT | 2020-13 | 3 IT-Central   | 3 | 4 | #####    | ##### |  |
| 24 | 1 IT | 2020-13 | 3 IT-Central   | 3 | 5 | 0        | 0     |  |
| 25 | 1 IT | 2020-13 | 3 IT-Central   | 3 | 5 | 0        | 0     |  |
| 26 | 1 IT | 2020-13 | 3 IT-Insular   | 1 | 1 | #####    | ##### |  |
| 27 | 1 IT | 2020-13 | 3 IT-Insular   | 1 | 2 | 0        | 0     |  |
| 28 | 1 IT | 2020-13 | 3 IT-Insular   | 1 | 3 | #####    | ##### |  |
| 29 | 1 IT | 2020-13 | 3 IT-Insular   | 1 | 4 | 0        | 0     |  |
| 30 | 1 IT | 2020-13 | 3 IT-Insular   | 1 | 5 | #####    | ##### |  |
| 31 | 1 IT | 2020-13 | 3 IT-Insular   | 2 | 1 | #####    | ##### |  |
| 32 | 1 IT | 2020-13 | 3 IT-Insular   | 2 | 2 | 0        | 0     |  |
| 33 | 1 IT | 2020-13 | 3 IT-Insular   | 2 | 3 | #####    | ##### |  |
| 34 | 1 IT | 2020-13 | 3 IT-Insular   | 2 | 4 | 0        | 0     |  |
| 35 | 1 IT | 2020-13 | 3 IT-Insular   | 2 | 5 | #####    | ##### |  |
| 36 | 1 IT | 2020-13 | 3 IT-Insular   | 3 | 1 | 0        | 0     |  |
| 37 | 1 IT | 2020-13 | 3 IT-Insular   | 3 | 2 | 0        | 0     |  |
| 38 | 1 IT | 2020-13 | 3 IT-Insular   | 3 | 3 | 0        | 0     |  |
| 39 | 1 IT | 2020-13 | 3 IT-Insular   | 3 | 4 | 0        | 0     |  |
| 40 | 1 IT | 2020-13 | 3 IT-Insular   | 3 | 5 | 0        | 0     |  |
| 41 | 1 IT | 2020-13 | 3 IT-Northeast | 1 | 1 | #####    | ##### |  |
| 42 | 1 IT | 2020-13 | 3 IT-Northeast | 1 | 2 | 0        | 0     |  |
| 43 | 1 IT | 2020-13 | 3 IT-Northeast | 1 | 3 | #####    | ##### |  |
| 44 | 1 IT | 2020-13 | 3 IT-Northeast | 1 | 4 | #####    | ##### |  |
| 45 | 1 IT | 2020-13 | 3 IT-Northeast | 1 | 5 | #####    | ##### |  |
| 46 | 1 IT | 2020-13 | 3 IT-Northeast | 2 | 1 | #####    | ##### |  |
| 47 | 1 IT | 2020-13 | 3 IT-Northeast | 2 | 2 | 0        | 0     |  |
| 48 | 1 IT | 2020-13 | 3 IT-Northeast | 2 | 3 | 0        | 0     |  |
| 49 | 1 IT | 2020-13 | 3 IT-Northeast | 2 | 4 | 0        | 0     |  |
| 50 | 1 IT | 2020-13 | 3 IT-Northeast | 2 | 5 | #####    | ##### |  |
| 51 | 1 IT | 2020-13 | 3 IT-Northeast | 3 | 1 | #####    | ##### |  |
| 52 | 1 IT | 2020-13 | 3 IT-Northeast | 3 | 2 | 0        | 0     |  |
| 53 | 1 IT | 2020-13 | 3 IT-Northeast | 3 | 3 | #####    | ##### |  |
| 54 | 1 IT | 2020-13 | 3 IT-Northeast | 3 | 4 | #####    | ##### |  |
| 55 | 1 IT | 2020-13 | 3 IT-Northeast | 3 | 5 | 0        | 0     |  |
| 56 | 1 IT | 2020-13 | 3 IT-Northeast | 3 | 5 | 0        | 0     |  |
| 57 | 1 IT | 2020-13 | 3 IT-Northwest | 1 | 1 | #####    | ##### |  |
| 58 | 1 IT | 2020-13 | 3 IT-Northwest | 1 | 2 | #####    | ##### |  |
| 59 | 1 IT | 2020-13 | 3 IT-Northwest | 1 | 3 | #####    | ##### |  |
| 60 | 1 IT | 2020-13 | 3 IT-Northwest | 1 | 4 | #####    | ##### |  |

1  
2  
3  
4  
5  
6  
7  
8  
9  
10  
11  
12  
13  
14  
15  
16  
17  
18  
19  
20  
21  
22  
23  
24  
25  
26  
27  
28  
29  
30  
31  
32  
33  
34  
35  
36  
37  
38  
39  
40  
41  
42  
43  
44  
45  
46  
47  
48  
49  
50  
51  
52  
53  
54  
55  
56  
57  
58  
59  
60

|      |         |              |   |   |          |       |
|------|---------|--------------|---|---|----------|-------|
| 1 IT | 2020-13 | 3 IT-Northwe | 1 | 5 | 0        | 0     |
| 1 IT | 2020-13 | 3 IT-Northwe | 2 | 1 | #####    | ##### |
| 1 IT | 2020-13 | 3 IT-Northwe | 2 | 2 | 0.1125   | ##### |
| 1 IT | 2020-13 | 3 IT-Northwe | 2 | 3 | #####    | ##### |
| 1 IT | 2020-13 | 3 IT-Northwe | 2 | 4 | #####    | ##### |
| 1 IT | 2020-13 | 3 IT-Northwe | 2 | 5 | 0        | 0     |
| 1 IT | 2020-13 | 3 IT-Northwe | 3 | 1 | 0        | 0     |
| 1 IT | 2020-13 | 3 IT-Northwe | 3 | 2 | 0        | 0     |
| 1 IT | 2020-13 | 3 IT-Northwe | 3 | 3 | 0        | 0     |
| 1 IT | 2020-13 | 3 IT-Northwe | 3 | 4 | 0        | 0     |
| 1 IT | 2020-13 | 3 IT-Northwe | 3 | 5 | 0        | 0     |
| 1 IT | 2020-13 | 3 IT-Overall | 1 | 1 | #####    | ##### |
| 1 IT | 2020-13 | 3 IT-Overall | 1 | 2 | #####    | ##### |
| 1 IT | 2020-13 | 3 IT-Overall | 1 | 3 | #####    | ##### |
| 1 IT | 2020-13 | 3 IT-Overall | 1 | 4 | #####    | ##### |
| 1 IT | 2020-13 | 3 IT-Overall | 1 | 5 | #####    | ##### |
| 1 IT | 2020-13 | 3 IT-Overall | 2 | 1 | #####    | ##### |
| 1 IT | 2020-13 | 3 IT-Overall | 2 | 2 | #####    | ##### |
| 1 IT | 2020-13 | 3 IT-Overall | 2 | 3 | #####    | ##### |
| 1 IT | 2020-13 | 3 IT-Overall | 2 | 4 | #####    | ##### |
| 1 IT | 2020-13 | 3 IT-Overall | 2 | 5 | #####    | ##### |
| 1 IT | 2020-13 | 3 IT-Overall | 3 | 1 | #####    | ##### |
| 1 IT | 2020-13 | 3 IT-Overall | 3 | 2 | #####    | ##### |
| 1 IT | 2020-13 | 3 IT-Overall | 3 | 3 | #####    | ##### |
| 1 IT | 2020-13 | 3 IT-Overall | 3 | 4 | #####    | ##### |
| 1 IT | 2020-13 | 3 IT-Overall | 3 | 5 | 0        | 0     |
| 1 IT | 2020-13 | 3 IT-South   | 1 | 1 | #####    | ##### |
| 1 IT | 2020-13 | 3 IT-South   | 1 | 2 | #####    | ##### |
| 1 IT | 2020-13 | 3 IT-South   | 1 | 3 | 0        | 0     |
| 1 IT | 2020-13 | 3 IT-South   | 1 | 4 | 0        | 0     |
| 1 IT | 2020-13 | 3 IT-South   | 1 | 5 | #####    | ##### |
| 1 IT | 2020-13 | 3 IT-South   | 2 | 1 | #####    | ##### |
| 1 IT | 2020-13 | 3 IT-South   | 2 | 2 | 0        | 0     |
| 1 IT | 2020-13 | 3 IT-South   | 2 | 3 | 0        | 0     |
| 1 IT | 2020-13 | 3 IT-South   | 2 | 4 | 0        | 0     |
| 1 IT | 2020-13 | 3 IT-South   | 2 | 5 | 0.125    | ##### |
| 1 IT | 2020-13 | 3 IT-South   | 3 | 1 | #####    | ##### |
| 1 IT | 2020-13 | 3 IT-South   | 3 | 2 | #####    | ##### |
| 1 IT | 2020-13 | 3 IT-South   | 3 | 3 | 0        | 0     |
| 1 IT | 2020-13 | 3 IT-South   | 3 | 4 | 0        | 0     |
| 1 IT | 2020-13 | 3 IT-South   | 3 | 5 | 0        | 0     |
| 1 IT | 2020-13 | 4 IT-Central | 1 | 1 | #####    | ##### |
| 1 IT | 2020-13 | 4 IT-Central | 1 | 2 | #####    | ##### |
| 1 IT | 2020-13 | 4 IT-Central | 1 | 3 | 1.519217 | ##### |
| 1 IT | 2020-13 | 4 IT-Central | 1 | 4 | #####    | ##### |
| 1 IT | 2020-13 | 4 IT-Central | 1 | 5 | 0        | 0     |
| 1 IT | 2020-13 | 4 IT-Central | 2 | 1 | #####    | ##### |
| 1 IT | 2020-13 | 4 IT-Central | 2 | 2 | #####    | ##### |
| 1 IT | 2020-13 | 4 IT-Central | 2 | 3 | #####    | ##### |
| 1 IT | 2020-13 | 4 IT-Central | 2 | 4 | #####    | ##### |
| 1 IT | 2020-13 | 4 IT-Central | 2 | 5 | 0        | 0     |
| 1 IT | 2020-13 | 4 IT-Central | 3 | 1 | 1.107135 | ##### |
| 1 IT | 2020-13 | 4 IT-Central | 3 | 2 | 0.52     | ##### |
| 1 IT | 2020-13 | 4 IT-Central | 3 | 3 | 2.833333 | ##### |
| 1 IT | 2020-13 | 4 IT-Central | 3 | 4 | 1.055556 | ##### |
| 1 IT | 2020-13 | 4 IT-Central | 3 | 5 | 0        | 0     |

|    |      |         |                |   |   |          |          |
|----|------|---------|----------------|---|---|----------|----------|
| 1  |      |         |                |   |   |          |          |
| 2  |      |         |                |   |   |          |          |
| 3  | 1 IT | 2020-13 | 4 IT-Insular   | 1 | 1 | #####    | #####    |
| 4  | 1 IT | 2020-13 | 4 IT-Insular   | 1 | 2 | 1.447088 | 1.373876 |
| 5  | 1 IT | 2020-13 | 4 IT-Insular   | 1 | 3 | #####    | #####    |
| 6  | 1 IT | 2020-13 | 4 IT-Insular   | 1 | 4 | #####    | #####    |
| 7  | 1 IT | 2020-13 | 4 IT-Insular   | 1 | 5 | #####    | #####    |
| 8  | 1 IT | 2020-13 | 4 IT-Insular   | 2 | 1 | #####    | #####    |
| 9  | 1 IT | 2020-13 | 4 IT-Insular   | 2 | 2 | 0        | 0        |
| 10 | 1 IT | 2020-13 | 4 IT-Insular   | 2 | 3 | #####    | #####    |
| 11 | 1 IT | 2020-13 | 4 IT-Insular   | 2 | 4 | #####    | #####    |
| 12 | 1 IT | 2020-13 | 4 IT-Insular   | 2 | 5 | #####    | #####    |
| 13 | 1 IT | 2020-13 | 4 IT-Insular   | 3 | 1 | #####    | #####    |
| 14 | 1 IT | 2020-13 | 4 IT-Insular   | 3 | 2 | 3.333333 | 3.043101 |
| 15 | 1 IT | 2020-13 | 4 IT-Insular   | 3 | 3 | #####    | #####    |
| 16 | 1 IT | 2020-13 | 4 IT-Insular   | 3 | 4 | 0        | 0        |
| 17 | 1 IT | 2020-13 | 4 IT-Insular   | 3 | 5 | 0        | 0        |
| 18 | 1 IT | 2020-13 | 4 IT-Northeast | 1 | 1 | #####    | #####    |
| 19 | 1 IT | 2020-13 | 4 IT-Northeast | 1 | 2 | #####    | #####    |
| 20 | 1 IT | 2020-13 | 4 IT-Northeast | 1 | 3 | 1.546788 | #####    |
| 21 | 1 IT | 2020-13 | 4 IT-Northeast | 1 | 4 | 1.014712 | #####    |
| 22 | 1 IT | 2020-13 | 4 IT-Northeast | 1 | 5 | #####    | #####    |
| 23 | 1 IT | 2020-13 | 4 IT-Northeast | 2 | 1 | 1.113168 | #####    |
| 24 | 1 IT | 2020-13 | 4 IT-Northeast | 2 | 2 | #####    | #####    |
| 25 | 1 IT | 2020-13 | 4 IT-Northeast | 2 | 3 | 1.493243 | #####    |
| 26 | 1 IT | 2020-13 | 4 IT-Northeast | 2 | 4 | 1.495652 | #####    |
| 27 | 1 IT | 2020-13 | 4 IT-Northeast | 2 | 5 | #####    | #####    |
| 28 | 1 IT | 2020-13 | 4 IT-Northeast | 3 | 1 | #####    | #####    |
| 29 | 1 IT | 2020-13 | 4 IT-Northeast | 3 | 2 | 1.037037 | #####    |
| 30 | 1 IT | 2020-13 | 4 IT-Northeast | 3 | 3 | 1.61194  | #####    |
| 31 | 1 IT | 2020-13 | 4 IT-Northeast | 3 | 4 | #####    | #####    |
| 32 | 1 IT | 2020-13 | 4 IT-Northeast | 3 | 5 | 0        | 0        |
| 33 | 1 IT | 2020-13 | 4 IT-Northwest | 1 | 1 | #####    | #####    |
| 34 | 1 IT | 2020-13 | 4 IT-Northwest | 1 | 2 | #####    | #####    |
| 35 | 1 IT | 2020-13 | 4 IT-Northwest | 1 | 3 | 1.880995 | #####    |
| 36 | 1 IT | 2020-13 | 4 IT-Northwest | 1 | 4 | #####    | #####    |
| 37 | 1 IT | 2020-13 | 4 IT-Northwest | 1 | 5 | #####    | #####    |
| 38 | 1 IT | 2020-13 | 4 IT-Northwest | 2 | 1 | #####    | #####    |
| 39 | 1 IT | 2020-13 | 4 IT-Northwest | 2 | 2 | #####    | #####    |
| 40 | 1 IT | 2020-13 | 4 IT-Northwest | 2 | 3 | 1.246512 | #####    |
| 41 | 1 IT | 2020-13 | 4 IT-Northwest | 2 | 4 | #####    | #####    |
| 42 | 1 IT | 2020-13 | 4 IT-Northwest | 2 | 5 | 0.2      | #####    |
| 43 | 1 IT | 2020-13 | 4 IT-Northwest | 3 | 1 | 1.492441 | #####    |
| 44 | 1 IT | 2020-13 | 4 IT-Northwest | 3 | 2 | #####    | #####    |
| 45 | 1 IT | 2020-13 | 4 IT-Northwest | 3 | 3 | 2.552941 | #####    |
| 46 | 1 IT | 2020-13 | 4 IT-Northwest | 3 | 4 | 1.453125 | #####    |
| 47 | 1 IT | 2020-13 | 4 IT-Northwest | 3 | 5 | 0        | 0        |
| 48 | 1 IT | 2020-13 | 4 IT-Overall   | 1 | 1 | #####    | #####    |
| 49 | 1 IT | 2020-13 | 4 IT-Overall   | 1 | 2 | #####    | #####    |
| 50 | 1 IT | 2020-13 | 4 IT-Overall   | 1 | 3 | 1.295162 | #####    |
| 51 | 1 IT | 2020-13 | 4 IT-Overall   | 1 | 4 | #####    | #####    |
| 52 | 1 IT | 2020-13 | 4 IT-Overall   | 1 | 5 | #####    | #####    |
| 53 | 1 IT | 2020-13 | 4 IT-Overall   | 2 | 1 | #####    | #####    |
| 54 | 1 IT | 2020-13 | 4 IT-Overall   | 2 | 2 | #####    | #####    |
| 55 | 1 IT | 2020-13 | 4 IT-Overall   | 2 | 3 | #####    | #####    |
| 56 | 1 IT | 2020-13 | 4 IT-Overall   | 2 | 4 | #####    | #####    |
| 57 | 1 IT | 2020-13 | 4 IT-Overall   | 2 | 5 | #####    | #####    |
| 58 | 1 IT | 2020-13 | 4 IT-Overall   | 2 | 1 | #####    | #####    |
| 59 | 1 IT | 2020-13 | 4 IT-Overall   | 3 | 1 | #####    | #####    |
| 60 | 1 IT | 2020-13 | 4 IT-Overall   | 3 | 1 | #####    | #####    |

1  
2  
3  
4  
5  
6  
7  
8  
9  
10  
11  
12  
13  
14  
15  
16  
17  
18  
19  
20  
21  
22  
23  
24  
25  
26  
27  
28  
29  
30  
31  
32  
33  
34  
35  
36  
37  
38  
39  
40  
41  
42  
43  
44  
45  
46  
47  
48  
49  
50  
51  
52  
53  
54  
55  
56  
57  
58  
59  
60

|      |         |                |   |   |          |       |
|------|---------|----------------|---|---|----------|-------|
| 1 IT | 2020-13 | 4 IT-Overall   | 3 | 2 | #####    | ##### |
| 1 IT | 2020-13 | 4 IT-Overall   | 3 | 3 | 1.652397 | ##### |
| 1 IT | 2020-13 | 4 IT-Overall   | 3 | 4 | #####    | ##### |
| 1 IT | 2020-13 | 4 IT-Overall   | 3 | 5 | 0        | 0     |
| 1 IT | 2020-13 | 4 IT-South     | 1 | 1 | #####    | ##### |
| 1 IT | 2020-13 | 4 IT-South     | 1 | 2 | #####    | ##### |
| 1 IT | 2020-13 | 4 IT-South     | 1 | 3 | #####    | ##### |
| 1 IT | 2020-13 | 4 IT-South     | 1 | 4 | #####    | ##### |
| 1 IT | 2020-13 | 4 IT-South     | 1 | 5 | 0        | 0     |
| 1 IT | 2020-13 | 4 IT-South     | 2 | 1 | #####    | ##### |
| 1 IT | 2020-13 | 4 IT-South     | 2 | 2 | #####    | ##### |
| 1 IT | 2020-13 | 4 IT-South     | 2 | 3 | #####    | ##### |
| 1 IT | 2020-13 | 4 IT-South     | 2 | 4 | #####    | ##### |
| 1 IT | 2020-13 | 4 IT-South     | 2 | 5 | 0        | 0     |
| 1 IT | 2020-13 | 4 IT-South     | 3 | 1 | #####    | ##### |
| 1 IT | 2020-13 | 4 IT-South     | 3 | 2 | 0        | 0     |
| 1 IT | 2020-13 | 4 IT-South     | 3 | 3 | 0.7      | ##### |
| 1 IT | 2020-13 | 4 IT-South     | 3 | 4 | 0        | 0     |
| 1 IT | 2020-13 | 4 IT-South     | 3 | 5 | 0        | 0     |
| 1 IT | 2020-13 | 5 IT-Central   | 1 | 1 | #####    | ##### |
| 1 IT | 2020-13 | 5 IT-Central   | 1 | 2 | #####    | ##### |
| 1 IT | 2020-13 | 5 IT-Central   | 1 | 3 | #####    | ##### |
| 1 IT | 2020-13 | 5 IT-Central   | 1 | 4 | #####    | ##### |
| 1 IT | 2020-13 | 5 IT-Central   | 1 | 5 | #####    | ##### |
| 1 IT | 2020-13 | 5 IT-Central   | 2 | 1 | #####    | ##### |
| 1 IT | 2020-13 | 5 IT-Central   | 2 | 2 | 0.2      | ##### |
| 1 IT | 2020-13 | 5 IT-Central   | 2 | 3 | 0.464    | ##### |
| 1 IT | 2020-13 | 5 IT-Central   | 2 | 4 | #####    | ##### |
| 1 IT | 2020-13 | 5 IT-Central   | 2 | 5 | #####    | ##### |
| 1 IT | 2020-13 | 5 IT-Central   | 3 | 1 | #####    | ##### |
| 1 IT | 2020-13 | 5 IT-Central   | 3 | 2 | 0.28     | ##### |
| 1 IT | 2020-13 | 5 IT-Central   | 3 | 3 | #####    | ##### |
| 1 IT | 2020-13 | 5 IT-Central   | 3 | 4 | #####    | ##### |
| 1 IT | 2020-13 | 5 IT-Central   | 3 | 5 | 0.45     | ##### |
| 1 IT | 2020-13 | 5 IT-Insular   | 1 | 1 | #####    | ##### |
| 1 IT | 2020-13 | 5 IT-Insular   | 1 | 2 | #####    | ##### |
| 1 IT | 2020-13 | 5 IT-Insular   | 1 | 3 | #####    | ##### |
| 1 IT | 2020-13 | 5 IT-Insular   | 1 | 4 | #####    | ##### |
| 1 IT | 2020-13 | 5 IT-Insular   | 1 | 5 | #####    | ##### |
| 1 IT | 2020-13 | 5 IT-Insular   | 2 | 1 | #####    | ##### |
| 1 IT | 2020-13 | 5 IT-Insular   | 2 | 2 | #####    | ##### |
| 1 IT | 2020-13 | 5 IT-Insular   | 2 | 3 | #####    | ##### |
| 1 IT | 2020-13 | 5 IT-Insular   | 2 | 4 | #####    | ##### |
| 1 IT | 2020-13 | 5 IT-Insular   | 2 | 5 | 0.8      | ##### |
| 1 IT | 2020-13 | 5 IT-Insular   | 3 | 1 | #####    | ##### |
| 1 IT | 2020-13 | 5 IT-Insular   | 3 | 2 | 0.5      | ##### |
| 1 IT | 2020-13 | 5 IT-Insular   | 3 | 3 | #####    | ##### |
| 1 IT | 2020-13 | 5 IT-Insular   | 3 | 4 | 1.444444 | ##### |
| 1 IT | 2020-13 | 5 IT-Insular   | 3 | 5 | 0        | 0     |
| 1 IT | 2020-13 | 5 IT-Northeast | 1 | 1 | #####    | ##### |
| 1 IT | 2020-13 | 5 IT-Northeast | 1 | 2 | #####    | ##### |
| 1 IT | 2020-13 | 5 IT-Northeast | 1 | 3 | #####    | ##### |
| 1 IT | 2020-13 | 5 IT-Northeast | 1 | 4 | #####    | ##### |
| 1 IT | 2020-13 | 5 IT-Northeast | 1 | 5 | #####    | ##### |
| 1 IT | 2020-13 | 5 IT-Northeast | 2 | 1 | #####    | ##### |
| 1 IT | 2020-13 | 5 IT-Northeast | 2 | 2 | #####    | ##### |

|    |      |         |                |   |   |          |       |
|----|------|---------|----------------|---|---|----------|-------|
| 1  |      |         |                |   |   |          |       |
| 2  |      |         |                |   |   |          |       |
| 3  | 1 IT | 2020-13 | 5 IT-Northeast | 2 | 3 | #####    | ##### |
| 4  | 1 IT | 2020-13 | 5 IT-Northeast | 2 | 4 | #####    | ##### |
| 5  | 1 IT | 2020-13 | 5 IT-Northeast | 2 | 5 | #####    | ##### |
| 6  | 1 IT | 2020-13 | 5 IT-Northeast | 3 | 1 | #####    | ##### |
| 7  | 1 IT | 2020-13 | 5 IT-Northeast | 3 | 2 | #####    | ##### |
| 8  | 1 IT | 2020-13 | 5 IT-Northeast | 3 | 3 | #####    | ##### |
| 9  | 1 IT | 2020-13 | 5 IT-Northeast | 3 | 4 | #####    | ##### |
| 10 | 1 IT | 2020-13 | 5 IT-Northeast | 3 | 5 | 1        | ##### |
| 11 | 1 IT | 2020-13 | 5 IT-Northwest | 1 | 1 | #####    | ##### |
| 12 | 1 IT | 2020-13 | 5 IT-Northwest | 1 | 2 | #####    | ##### |
| 13 | 1 IT | 2020-13 | 5 IT-Northwest | 1 | 3 | #####    | ##### |
| 14 | 1 IT | 2020-13 | 5 IT-Northwest | 1 | 4 | #####    | ##### |
| 15 | 1 IT | 2020-13 | 5 IT-Northwest | 1 | 5 | #####    | ##### |
| 16 | 1 IT | 2020-13 | 5 IT-Northwest | 2 | 1 | #####    | ##### |
| 17 | 1 IT | 2020-13 | 5 IT-Northwest | 2 | 2 | 0.55     | ##### |
| 18 | 1 IT | 2020-13 | 5 IT-Northwest | 2 | 3 | #####    | ##### |
| 19 | 1 IT | 2020-13 | 5 IT-Northwest | 2 | 4 | #####    | ##### |
| 20 | 1 IT | 2020-13 | 5 IT-Northwest | 2 | 5 | #####    | ##### |
| 21 | 1 IT | 2020-13 | 5 IT-Northwest | 3 | 1 | #####    | ##### |
| 22 | 1 IT | 2020-13 | 5 IT-Northwest | 3 | 2 | #####    | ##### |
| 23 | 1 IT | 2020-13 | 5 IT-Northwest | 3 | 3 | #####    | ##### |
| 24 | 1 IT | 2020-13 | 5 IT-Northwest | 3 | 4 | 0.84375  | ##### |
| 25 | 1 IT | 2020-13 | 5 IT-Northwest | 3 | 5 | 0.5625   | ##### |
| 26 | 1 IT | 2020-13 | 5 IT-Overall   | 1 | 1 | #####    | ##### |
| 27 | 1 IT | 2020-13 | 5 IT-Overall   | 1 | 2 | #####    | ##### |
| 28 | 1 IT | 2020-13 | 5 IT-Overall   | 1 | 3 | #####    | ##### |
| 29 | 1 IT | 2020-13 | 5 IT-Overall   | 1 | 4 | #####    | ##### |
| 30 | 1 IT | 2020-13 | 5 IT-Overall   | 1 | 5 | #####    | ##### |
| 31 | 1 IT | 2020-13 | 5 IT-Overall   | 2 | 1 | #####    | ##### |
| 32 | 1 IT | 2020-13 | 5 IT-Overall   | 2 | 2 | #####    | ##### |
| 33 | 1 IT | 2020-13 | 5 IT-Overall   | 2 | 3 | #####    | ##### |
| 34 | 1 IT | 2020-13 | 5 IT-Overall   | 2 | 4 | #####    | ##### |
| 35 | 1 IT | 2020-13 | 5 IT-Overall   | 2 | 5 | #####    | ##### |
| 36 | 1 IT | 2020-13 | 5 IT-Overall   | 2 | 5 | #####    | ##### |
| 37 | 1 IT | 2020-13 | 5 IT-Overall   | 3 | 1 | #####    | ##### |
| 38 | 1 IT | 2020-13 | 5 IT-Overall   | 3 | 2 | #####    | ##### |
| 39 | 1 IT | 2020-13 | 5 IT-Overall   | 3 | 3 | #####    | ##### |
| 40 | 1 IT | 2020-13 | 5 IT-Overall   | 3 | 4 | #####    | ##### |
| 41 | 1 IT | 2020-13 | 5 IT-Overall   | 3 | 5 | #####    | ##### |
| 42 | 1 IT | 2020-13 | 5 IT-South     | 1 | 1 | #####    | ##### |
| 43 | 1 IT | 2020-13 | 5 IT-South     | 1 | 2 | #####    | ##### |
| 44 | 1 IT | 2020-13 | 5 IT-South     | 1 | 3 | #####    | ##### |
| 45 | 1 IT | 2020-13 | 5 IT-South     | 1 | 4 | #####    | ##### |
| 46 | 1 IT | 2020-13 | 5 IT-South     | 1 | 5 | #####    | ##### |
| 47 | 1 IT | 2020-13 | 5 IT-South     | 2 | 1 | #####    | ##### |
| 48 | 1 IT | 2020-13 | 5 IT-South     | 2 | 2 | #####    | ##### |
| 49 | 1 IT | 2020-13 | 5 IT-South     | 2 | 3 | #####    | ##### |
| 50 | 1 IT | 2020-13 | 5 IT-South     | 2 | 4 | #####    | ##### |
| 51 | 1 IT | 2020-13 | 5 IT-South     | 2 | 5 | 0.125    | ##### |
| 52 | 1 IT | 2020-13 | 5 IT-South     | 3 | 1 | #####    | ##### |
| 53 | 1 IT | 2020-13 | 5 IT-South     | 3 | 2 | #####    | ##### |
| 54 | 1 IT | 2020-13 | 5 IT-South     | 3 | 3 | 0.375    | ##### |
| 55 | 1 IT | 2020-13 | 5 IT-South     | 3 | 4 | 0.6875   | ##### |
| 56 | 1 IT | 2020-13 | 5 IT-South     | 3 | 5 | #####    | ##### |
| 57 | 1 IT | 2020-14 | 1 IT-Central   | 1 | 1 | 3.426156 | ##### |
| 58 | 1 IT | 2020-14 | 1 IT-Central   | 1 | 2 | 4.333028 | ##### |
| 59 | 1 IT | 2020-14 | 1 IT-Central   | 1 | 3 | 3.653778 | ##### |
| 60 | 1 IT | 2020-14 | 1 IT-Central   | 1 | 3 | 3.653778 | ##### |

1  
2  
3  
4  
5  
6  
7  
8  
9  
10  
11  
12  
13  
14  
15  
16  
17  
18  
19  
20  
21  
22  
23  
24  
25  
26  
27  
28  
29  
30  
31  
32  
33  
34  
35  
36  
37  
38  
39  
40  
41  
42  
43  
44  
45  
46  
47  
48  
49  
50  
51  
52  
53  
54  
55  
56  
57  
58  
59  
60

|      |         |                |   |   |          |          |
|------|---------|----------------|---|---|----------|----------|
| 1 IT | 2020-14 | 1 IT-Central   | 1 | 4 | 3.586529 | #####    |
| 1 IT | 2020-14 | 1 IT-Central   | 1 | 5 | 2.13571  | #####    |
| 1 IT | 2020-14 | 1 IT-Central   | 2 | 1 | 2.963317 | #####    |
| 1 IT | 2020-14 | 1 IT-Central   | 2 | 2 | 3.758621 | #####    |
| 1 IT | 2020-14 | 1 IT-Central   | 2 | 3 | 3.360465 | #####    |
| 1 IT | 2020-14 | 1 IT-Central   | 2 | 4 | 3.404255 | #####    |
| 1 IT | 2020-14 | 1 IT-Central   | 2 | 5 | 1.73913  | #####    |
| 1 IT | 2020-14 | 1 IT-Central   | 3 | 1 | 4.050269 | #####    |
| 1 IT | 2020-14 | 1 IT-Central   | 3 | 2 | 4.75     | #####    |
| 1 IT | 2020-14 | 1 IT-Central   | 3 | 3 | 3.970588 | #####    |
| 1 IT | 2020-14 | 1 IT-Central   | 3 | 4 | 3.818182 | 1.214041 |
| 1 IT | 2020-14 | 1 IT-Central   | 3 | 5 | 3.75     | 1.243815 |
| 1 IT | 2020-14 | 1 IT-Insular   | 1 | 1 | 3.906455 | #####    |
| 1 IT | 2020-14 | 1 IT-Insular   | 1 | 2 | 2.949047 | #####    |
| 1 IT | 2020-14 | 1 IT-Insular   | 1 | 3 | 6.39035  | 1.423838 |
| 1 IT | 2020-14 | 1 IT-Insular   | 1 | 4 | 2.323951 | #####    |
| 1 IT | 2020-14 | 1 IT-Insular   | 1 | 5 | 2        | #####    |
| 1 IT | 2020-14 | 1 IT-Insular   | 2 | 1 | 3.091213 | #####    |
| 1 IT | 2020-14 | 1 IT-Insular   | 2 | 2 | 2.928571 | #####    |
| 1 IT | 2020-14 | 1 IT-Insular   | 2 | 3 | 4.689655 | 1.050637 |
| 1 IT | 2020-14 | 1 IT-Insular   | 2 | 4 | 1.733333 | #####    |
| 1 IT | 2020-14 | 1 IT-Insular   | 2 | 5 | 2        | #####    |
| 1 IT | 2020-14 | 1 IT-Insular   | 3 | 1 | 5.409192 | 1.618859 |
| 1 IT | 2020-14 | 1 IT-Insular   | 3 | 2 | 3        | #####    |
| 1 IT | 2020-14 | 1 IT-Insular   | 3 | 3 | 9.833333 | 3.411124 |
| 1 IT | 2020-14 | 1 IT-Insular   | 3 | 4 | 3        | 1.2473   |
| 1 IT | 2020-14 | 1 IT-Northeast | 1 | 1 | 3.155172 | #####    |
| 1 IT | 2020-14 | 1 IT-Northeast | 1 | 2 | 3.616706 | #####    |
| 1 IT | 2020-14 | 1 IT-Northeast | 1 | 3 | 3.922915 | #####    |
| 1 IT | 2020-14 | 1 IT-Northeast | 1 | 4 | 3.130217 | #####    |
| 1 IT | 2020-14 | 1 IT-Northeast | 1 | 5 | 2.13074  | #####    |
| 1 IT | 2020-14 | 1 IT-Northeast | 2 | 1 | 3.323318 | #####    |
| 1 IT | 2020-14 | 1 IT-Northeast | 2 | 2 | 3.244444 | #####    |
| 1 IT | 2020-14 | 1 IT-Northeast | 2 | 3 | 4.256757 | #####    |
| 1 IT | 2020-14 | 1 IT-Northeast | 2 | 4 | 3.541667 | #####    |
| 1 IT | 2020-14 | 1 IT-Northeast | 2 | 5 | 2.15     | #####    |
| 1 IT | 2020-14 | 1 IT-Northeast | 3 | 1 | 2.979287 | #####    |
| 1 IT | 2020-14 | 1 IT-Northeast | 3 | 2 | 4        | #####    |
| 1 IT | 2020-14 | 1 IT-Northeast | 3 | 3 | 3.613636 | #####    |
| 1 IT | 2020-14 | 1 IT-Northeast | 3 | 4 | 2.625    | #####    |
| 1 IT | 2020-14 | 1 IT-Northeast | 3 | 5 | 2.111111 | #####    |
| 1 IT | 2020-14 | 1 IT-Northwest | 1 | 1 | 2.898648 | #####    |
| 1 IT | 2020-14 | 1 IT-Northwest | 1 | 2 | 3.266544 | #####    |
| 1 IT | 2020-14 | 1 IT-Northwest | 1 | 3 | 3.589358 | #####    |
| 1 IT | 2020-14 | 1 IT-Northwest | 1 | 4 | 2.84607  | #####    |
| 1 IT | 2020-14 | 1 IT-Northwest | 1 | 5 | 1.767783 | #####    |
| 1 IT | 2020-14 | 1 IT-Northwest | 2 | 1 | 2.650473 | #####    |
| 1 IT | 2020-14 | 1 IT-Northwest | 2 | 2 | 4.206897 | #####    |
| 1 IT | 2020-14 | 1 IT-Northwest | 2 | 3 | 2.947826 | #####    |
| 1 IT | 2020-14 | 1 IT-Northwest | 2 | 4 | 2.333333 | #####    |
| 1 IT | 2020-14 | 1 IT-Northwest | 2 | 5 | 1.421053 | #####    |
| 1 IT | 2020-14 | 1 IT-Northwest | 3 | 1 | 3.124689 | #####    |
| 1 IT | 2020-14 | 1 IT-Northwest | 3 | 2 | 2.4      | #####    |
| 1 IT | 2020-14 | 1 IT-Northwest | 3 | 3 | 4.26087  | #####    |
| 1 IT | 2020-14 | 1 IT-Northwest | 3 | 4 | 3.289474 | #####    |
| 1 IT | 2020-14 | 1 IT-Northwest | 3 | 5 | 2.045455 | #####    |



|    |      |         |              |   |   |          |          |  |
|----|------|---------|--------------|---|---|----------|----------|--|
| 1  |      |         |              |   |   |          |          |  |
| 2  |      |         |              |   |   |          |          |  |
| 3  | 1 IT | 2020-14 | 1 IT-Overall | 1 | 1 | 3.113528 | #####    |  |
| 4  | 1 IT | 2020-14 | 1 IT-Overall | 1 | 2 | 3.584086 | #####    |  |
| 5  | 1 IT | 2020-14 | 1 IT-Overall | 1 | 3 | 3.769997 | #####    |  |
| 6  | 1 IT | 2020-14 | 1 IT-Overall | 1 | 4 | 2.945211 | #####    |  |
| 7  | 1 IT | 2020-14 | 1 IT-Overall | 1 | 5 | 2.025834 | #####    |  |
| 8  | 1 IT | 2020-14 | 1 IT-Overall | 2 | 1 | 2.955156 | #####    |  |
| 9  | 1 IT | 2020-14 | 1 IT-Overall | 2 | 2 | 3.623781 | #####    |  |
| 10 | 1 IT | 2020-14 | 1 IT-Overall | 2 | 3 | 3.495881 | #####    |  |
| 11 | 1 IT | 2020-14 | 1 IT-Overall | 2 | 4 | 2.859261 | #####    |  |
| 12 | 1 IT | 2020-14 | 1 IT-Overall | 2 | 5 | 1.952984 | #####    |  |
| 13 | 1 IT | 2020-14 | 1 IT-Overall | 3 | 1 | 3.299857 | #####    |  |
| 14 | 1 IT | 2020-14 | 1 IT-Overall | 3 | 2 | 3.538263 | #####    |  |
| 15 | 1 IT | 2020-14 | 1 IT-Overall | 3 | 3 | 4.077234 | #####    |  |
| 16 | 1 IT | 2020-14 | 1 IT-Overall | 3 | 4 | 3.033614 | #####    |  |
| 17 | 1 IT | 2020-14 | 1 IT-Overall | 3 | 5 | 2.136934 | #####    |  |
| 18 | 1 IT | 2020-14 | 1 IT-South   | 1 | 1 | 2.76644  | #####    |  |
| 19 | 1 IT | 2020-14 | 1 IT-South   | 1 | 2 | 3.472666 | #####    |  |
| 20 | 1 IT | 2020-14 | 1 IT-South   | 1 | 3 | 3.139578 | #####    |  |
| 21 | 1 IT | 2020-14 | 1 IT-South   | 1 | 4 | 2.23289  | #####    |  |
| 22 | 1 IT | 2020-14 | 1 IT-South   | 1 | 5 | 2.136255 | 1.280351 |  |
| 23 | 1 IT | 2020-14 | 1 IT-South   | 2 | 1 | 2.915823 | #####    |  |
| 24 | 1 IT | 2020-14 | 1 IT-South   | 2 | 2 | 3.416667 | #####    |  |
| 25 | 1 IT | 2020-14 | 1 IT-South   | 2 | 3 | 3.2      | #####    |  |
| 26 | 1 IT | 2020-14 | 1 IT-South   | 2 | 4 | 2.545455 | #####    |  |
| 27 | 1 IT | 2020-14 | 1 IT-South   | 2 | 5 | 2.416667 | 1.800805 |  |
| 28 | 1 IT | 2020-14 | 1 IT-South   | 3 | 1 | 2.556746 | #####    |  |
| 29 | 1 IT | 2020-14 | 1 IT-South   | 3 | 2 | 3.6      | #####    |  |
| 30 | 1 IT | 2020-14 | 1 IT-South   | 3 | 3 | 3.066667 | #####    |  |
| 31 | 1 IT | 2020-14 | 1 IT-South   | 3 | 4 | 2        | #####    |  |
| 32 | 1 IT | 2020-14 | 1 IT-South   | 3 | 5 | 1.5      | #####    |  |
| 33 | 1 IT | 2020-14 | 2 IT-Central | 1 | 1 | 1.721614 | #####    |  |
| 34 | 1 IT | 2020-14 | 2 IT-Central | 1 | 2 | 2.826051 | #####    |  |
| 35 | 1 IT | 2020-14 | 2 IT-Central | 1 | 3 | 1.706234 | #####    |  |
| 36 | 1 IT | 2020-14 | 2 IT-Central | 1 | 4 | 1.641207 | #####    |  |
| 37 | 1 IT | 2020-14 | 2 IT-Central | 1 | 5 | 1.12099  | #####    |  |
| 38 | 1 IT | 2020-14 | 2 IT-Central | 2 | 1 | 1.740391 | #####    |  |
| 39 | 1 IT | 2020-14 | 2 IT-Central | 2 | 2 | 2.758621 | #####    |  |
| 40 | 1 IT | 2020-14 | 2 IT-Central | 2 | 3 | 1.879121 | #####    |  |
| 41 | 1 IT | 2020-14 | 2 IT-Central | 2 | 4 | 1.75     | #####    |  |
| 42 | 1 IT | 2020-14 | 2 IT-Central | 2 | 5 | 1.208333 | #####    |  |
| 43 | 1 IT | 2020-14 | 2 IT-Central | 3 | 1 | 1.69566  | #####    |  |
| 44 | 1 IT | 2020-14 | 2 IT-Central | 3 | 2 | 2.875    | #####    |  |
| 45 | 1 IT | 2020-14 | 2 IT-Central | 3 | 3 | 1.514286 | #####    |  |
| 46 | 1 IT | 2020-14 | 2 IT-Central | 3 | 4 | 1.5      | #####    |  |
| 47 | 1 IT | 2020-14 | 2 IT-Central | 3 | 5 | 0.75     | #####    |  |
| 48 | 1 IT | 2020-14 | 2 IT-Insular | 1 | 1 | 1.90648  | #####    |  |
| 49 | 1 IT | 2020-14 | 2 IT-Insular | 1 | 2 | 2.439518 | #####    |  |
| 50 | 1 IT | 2020-14 | 2 IT-Insular | 1 | 3 | 2.269721 | #####    |  |
| 51 | 1 IT | 2020-14 | 2 IT-Insular | 1 | 4 | 1.495309 | #####    |  |
| 52 | 1 IT | 2020-14 | 2 IT-Insular | 1 | 5 | 1.333333 | #####    |  |
| 53 | 1 IT | 2020-14 | 2 IT-Insular | 2 | 1 | 1.908001 | #####    |  |
| 54 | 1 IT | 2020-14 | 2 IT-Insular | 2 | 2 | 2.214286 | #####    |  |
| 55 | 1 IT | 2020-14 | 2 IT-Insular | 2 | 3 | 2.548387 | #####    |  |
| 56 | 1 IT | 2020-14 | 2 IT-Insular | 2 | 4 | 1.2      | #####    |  |
| 57 | 1 IT | 2020-14 | 2 IT-Insular | 2 | 5 | 1.333333 | #####    |  |
| 58 | 1 IT | 2020-14 | 2 IT-Insular | 2 | 1 | 1.903601 | #####    |  |
| 59 | 1 IT | 2020-14 | 2 IT-Insular | 3 |   |          |          |  |
| 60 | 1 IT | 2020-14 | 2 IT-Insular | 3 | 1 | 1.903601 | #####    |  |

|    |      |         |                |   |   |          |       |  |
|----|------|---------|----------------|---|---|----------|-------|--|
| 1  |      |         |                |   |   |          |       |  |
| 2  |      |         |                |   |   |          |       |  |
| 3  | 1 IT | 2020-14 | 2 IT-Insular   | 3 | 2 | 3        | ##### |  |
| 4  | 1 IT | 2020-14 | 2 IT-Insular   | 3 | 3 | 1.666667 | ##### |  |
| 5  | 1 IT | 2020-14 | 2 IT-Insular   | 3 | 4 | 1.833333 | ##### |  |
| 6  | 1 IT | 2020-14 | 2 IT-Northeast | 1 | 1 | 1.650954 | ##### |  |
| 7  | 1 IT | 2020-14 | 2 IT-Northeast | 1 | 2 | 2.82108  | ##### |  |
| 8  | 1 IT | 2020-14 | 2 IT-Northeast | 1 | 3 | 1.663589 | ##### |  |
| 9  | 1 IT | 2020-14 | 2 IT-Northeast | 1 | 4 | 1.310894 | ##### |  |
| 10 | 1 IT | 2020-14 | 2 IT-Northeast | 1 | 5 | 1.424016 | ##### |  |
| 11 | 1 IT | 2020-14 | 2 IT-Northeast | 2 | 1 | 1.585477 | ##### |  |
| 12 | 1 IT | 2020-14 | 2 IT-Northeast | 2 | 2 | 2.688889 | ##### |  |
| 13 | 1 IT | 2020-14 | 2 IT-Northeast | 2 | 3 | 1.723684 | ##### |  |
| 14 | 1 IT | 2020-14 | 2 IT-Northeast | 2 | 4 | 1.431373 | ##### |  |
| 15 | 1 IT | 2020-14 | 2 IT-Northeast | 2 | 5 | 1.1      | ##### |  |
| 16 | 1 IT | 2020-14 | 2 IT-Northeast | 3 | 1 | 1.716041 | ##### |  |
| 17 | 1 IT | 2020-14 | 2 IT-Northeast | 3 | 2 | 2.941176 | ##### |  |
| 18 | 1 IT | 2020-14 | 2 IT-Northeast | 3 | 3 | 1.612245 | ##### |  |
| 19 | 1 IT | 2020-14 | 2 IT-Northeast | 3 | 4 | 1.16     | ##### |  |
| 20 | 1 IT | 2020-14 | 2 IT-Northeast | 3 | 5 | 1.736842 | ##### |  |
| 21 | 1 IT | 2020-14 | 2 IT-Northeast | 1 | 1 | 1.650085 | ##### |  |
| 22 | 1 IT | 2020-14 | 2 IT-Northeast | 1 | 2 | 2.527637 | ##### |  |
| 23 | 1 IT | 2020-14 | 2 IT-Northeast | 1 | 3 | 1.810435 | ##### |  |
| 24 | 1 IT | 2020-14 | 2 IT-Northeast | 1 | 4 | 1.537718 | ##### |  |
| 25 | 1 IT | 2020-14 | 2 IT-Northeast | 1 | 5 | #####    | ##### |  |
| 26 | 1 IT | 2020-14 | 2 IT-Northeast | 2 | 1 | 1.634416 | ##### |  |
| 27 | 1 IT | 2020-14 | 2 IT-Northeast | 2 | 2 | 2.775862 | ##### |  |
| 28 | 1 IT | 2020-14 | 2 IT-Northeast | 2 | 3 | 1.70339  | ##### |  |
| 29 | 1 IT | 2020-14 | 2 IT-Northeast | 2 | 4 | 1.490909 | ##### |  |
| 30 | 1 IT | 2020-14 | 2 IT-Northeast | 2 | 5 | #####    | ##### |  |
| 31 | 1 IT | 2020-14 | 2 IT-Northeast | 3 | 1 | 1.664201 | ##### |  |
| 32 | 1 IT | 2020-14 | 2 IT-Northeast | 3 | 2 | 2.307692 | ##### |  |
| 33 | 1 IT | 2020-14 | 2 IT-Northeast | 3 | 3 | 1.918367 | ##### |  |
| 34 | 1 IT | 2020-14 | 2 IT-Northeast | 3 | 4 | 1.578947 | ##### |  |
| 35 | 1 IT | 2020-14 | 2 IT-Northeast | 3 | 5 | 1        | ##### |  |
| 36 | 1 IT | 2020-14 | 2 IT-Overall   | 1 | 1 | 1.725348 | ##### |  |
| 37 | 1 IT | 2020-14 | 2 IT-Overall   | 1 | 2 | 2.780489 | ##### |  |
| 38 | 1 IT | 2020-14 | 2 IT-Overall   | 1 | 3 | 1.887139 | ##### |  |
| 39 | 1 IT | 2020-14 | 2 IT-Overall   | 1 | 4 | 1.520174 | ##### |  |
| 40 | 1 IT | 2020-14 | 2 IT-Overall   | 1 | 5 | 1.038913 | ##### |  |
| 41 | 1 IT | 2020-14 | 2 IT-Overall   | 2 | 1 | 1.734846 | ##### |  |
| 42 | 1 IT | 2020-14 | 2 IT-Overall   | 2 | 2 | 2.76396  | ##### |  |
| 43 | 1 IT | 2020-14 | 2 IT-Overall   | 2 | 3 | 2.027602 | ##### |  |
| 44 | 1 IT | 2020-14 | 2 IT-Overall   | 2 | 4 | 1.549039 | ##### |  |
| 45 | 1 IT | 2020-14 | 2 IT-Overall   | 2 | 5 | #####    | ##### |  |
| 46 | 1 IT | 2020-14 | 2 IT-Overall   | 3 | 1 | 1.714234 | ##### |  |
| 47 | 1 IT | 2020-14 | 2 IT-Overall   | 3 | 2 | 2.798836 | ##### |  |
| 48 | 1 IT | 2020-14 | 2 IT-Overall   | 3 | 3 | 1.732141 | ##### |  |
| 49 | 1 IT | 2020-14 | 2 IT-Overall   | 3 | 4 | 1.489654 | ##### |  |
| 50 | 1 IT | 2020-14 | 2 IT-Overall   | 3 | 5 | 1.175606 | ##### |  |
| 51 | 1 IT | 2020-14 | 2 IT-South     | 1 | 1 | 1.848246 | ##### |  |
| 52 | 1 IT | 2020-14 | 2 IT-South     | 1 | 2 | 3.154331 | ##### |  |
| 53 | 1 IT | 2020-14 | 2 IT-South     | 1 | 3 | 2.20692  | ##### |  |
| 54 | 1 IT | 2020-14 | 2 IT-South     | 1 | 4 | 1.612094 | ##### |  |
| 55 | 1 IT | 2020-14 | 2 IT-South     | 1 | 5 | #####    | ##### |  |
| 56 | 1 IT | 2020-14 | 2 IT-South     | 2 | 1 | 1.905516 | ##### |  |
| 57 | 1 IT | 2020-14 | 2 IT-South     | 2 | 2 | 2.958333 | ##### |  |
| 58 | 1 IT | 2020-14 | 2 IT-South     | 2 | 3 | 2.488889 | ##### |  |
| 59 | 1 IT | 2020-14 | 2 IT-South     | 2 | 3 | 2.488889 | ##### |  |
| 60 | 1 IT | 2020-14 | 2 IT-South     | 2 | 3 | 2.488889 | ##### |  |

|    |      |         |                |   |   |          |       |  |
|----|------|---------|----------------|---|---|----------|-------|--|
| 1  |      |         |                |   |   |          |       |  |
| 2  |      |         |                |   |   |          |       |  |
| 3  | 1 IT | 2020-14 | 2 IT-South     | 2 | 4 | 1.75     | ##### |  |
| 4  | 1 IT | 2020-14 | 2 IT-South     | 2 | 5 | #####    | ##### |  |
| 5  | 1 IT | 2020-14 | 2 IT-South     | 3 | 1 | 1.766819 | ##### |  |
| 6  | 1 IT | 2020-14 | 2 IT-South     | 3 | 2 | 3.6      | ##### |  |
| 7  | 1 IT | 2020-14 | 2 IT-South     | 3 | 3 | 1.866667 | ##### |  |
| 8  | 1 IT | 2020-14 | 2 IT-South     | 3 | 4 | 1.5      | ##### |  |
| 9  | 1 IT | 2020-14 | 2 IT-South     | 3 | 5 | 0.75     | ##### |  |
| 10 | 1 IT | 2020-14 | 3 IT-Central   | 1 | 1 | #####    | ##### |  |
| 11 | 1 IT | 2020-14 | 3 IT-Central   | 1 | 2 | #####    | ##### |  |
| 12 | 1 IT | 2020-14 | 3 IT-Central   | 1 | 3 | #####    | ##### |  |
| 13 | 1 IT | 2020-14 | 3 IT-Central   | 1 | 4 | #####    | ##### |  |
| 14 | 1 IT | 2020-14 | 3 IT-Central   | 1 | 5 | #####    | ##### |  |
| 15 | 1 IT | 2020-14 | 3 IT-Central   | 2 | 1 | #####    | ##### |  |
| 16 | 1 IT | 2020-14 | 3 IT-Central   | 2 | 2 | #####    | ##### |  |
| 17 | 1 IT | 2020-14 | 3 IT-Central   | 2 | 3 | #####    | ##### |  |
| 18 | 1 IT | 2020-14 | 3 IT-Central   | 2 | 4 | 0        | 0     |  |
| 19 | 1 IT | 2020-14 | 3 IT-Central   | 2 | 5 | #####    | ##### |  |
| 20 | 1 IT | 2020-14 | 3 IT-Central   | 3 | 1 | #####    | ##### |  |
| 21 | 1 IT | 2020-14 | 3 IT-Central   | 3 | 2 | 0.1875   | ##### |  |
| 22 | 1 IT | 2020-14 | 3 IT-Central   | 3 | 3 | 0        | 0     |  |
| 23 | 1 IT | 2020-14 | 3 IT-Central   | 3 | 4 | #####    | ##### |  |
| 24 | 1 IT | 2020-14 | 3 IT-Central   | 3 | 5 | 0        | 0     |  |
| 25 | 1 IT | 2020-14 | 3 IT-Central   | 3 | 5 | 0        | 0     |  |
| 26 | 1 IT | 2020-14 | 3 IT-Insular   | 1 | 1 | #####    | ##### |  |
| 27 | 1 IT | 2020-14 | 3 IT-Insular   | 1 | 2 | 0        | 0     |  |
| 28 | 1 IT | 2020-14 | 3 IT-Insular   | 1 | 3 | #####    | ##### |  |
| 29 | 1 IT | 2020-14 | 3 IT-Insular   | 1 | 4 | 0        | 0     |  |
| 30 | 1 IT | 2020-14 | 3 IT-Insular   | 1 | 5 | #####    | ##### |  |
| 31 | 1 IT | 2020-14 | 3 IT-Insular   | 2 | 1 | #####    | ##### |  |
| 32 | 1 IT | 2020-14 | 3 IT-Insular   | 2 | 2 | 0        | 0     |  |
| 33 | 1 IT | 2020-14 | 3 IT-Insular   | 2 | 3 | #####    | ##### |  |
| 34 | 1 IT | 2020-14 | 3 IT-Insular   | 2 | 4 | 0        | 0     |  |
| 35 | 1 IT | 2020-14 | 3 IT-Insular   | 2 | 5 | #####    | ##### |  |
| 36 | 1 IT | 2020-14 | 3 IT-Insular   | 3 | 1 | 0        | 0     |  |
| 37 | 1 IT | 2020-14 | 3 IT-Insular   | 3 | 2 | 0        | 0     |  |
| 38 | 1 IT | 2020-14 | 3 IT-Insular   | 3 | 3 | 0        | 0     |  |
| 39 | 1 IT | 2020-14 | 3 IT-Insular   | 3 | 4 | 0        | 0     |  |
| 40 | 1 IT | 2020-14 | 3 IT-Northeast | 1 | 1 | #####    | ##### |  |
| 41 | 1 IT | 2020-14 | 3 IT-Northeast | 1 | 2 | 0        | 0     |  |
| 42 | 1 IT | 2020-14 | 3 IT-Northeast | 1 | 3 | #####    | ##### |  |
| 43 | 1 IT | 2020-14 | 3 IT-Northeast | 1 | 4 | #####    | ##### |  |
| 44 | 1 IT | 2020-14 | 3 IT-Northeast | 1 | 5 | 0        | 0     |  |
| 45 | 1 IT | 2020-14 | 3 IT-Northeast | 2 | 1 | #####    | ##### |  |
| 46 | 1 IT | 2020-14 | 3 IT-Northeast | 2 | 2 | 0        | 0     |  |
| 47 | 1 IT | 2020-14 | 3 IT-Northeast | 2 | 3 | 0        | 0     |  |
| 48 | 1 IT | 2020-14 | 3 IT-Northeast | 2 | 4 | 0.08     | ##### |  |
| 49 | 1 IT | 2020-14 | 3 IT-Northeast | 2 | 5 | 0        | 0     |  |
| 50 | 1 IT | 2020-14 | 3 IT-Northeast | 3 | 1 | #####    | ##### |  |
| 51 | 1 IT | 2020-14 | 3 IT-Northeast | 3 | 2 | 0        | 0     |  |
| 52 | 1 IT | 2020-14 | 3 IT-Northeast | 3 | 3 | #####    | ##### |  |
| 53 | 1 IT | 2020-14 | 3 IT-Northeast | 3 | 4 | 0.04     | ##### |  |
| 54 | 1 IT | 2020-14 | 3 IT-Northeast | 3 | 5 | 0        | 0     |  |
| 55 | 1 IT | 2020-14 | 3 IT-Northeast | 1 | 1 | #####    | ##### |  |
| 56 | 1 IT | 2020-14 | 3 IT-Northeast | 1 | 2 | 0        | 0     |  |
| 57 | 1 IT | 2020-14 | 3 IT-Northeast | 1 | 3 | #####    | ##### |  |
| 58 | 1 IT | 2020-14 | 3 IT-Northeast | 1 | 4 | 0        | 0     |  |
| 59 | 1 IT | 2020-14 | 3 IT-Northeast | 1 | 5 | #####    | ##### |  |
| 60 | 1 IT | 2020-14 | 3 IT-Northeast | 1 | 5 | #####    | ##### |  |

1  
2  
3  
4  
5  
6  
7  
8  
9  
10  
11  
12  
13  
14  
15  
16  
17  
18  
19  
20  
21  
22  
23  
24  
25  
26  
27  
28  
29  
30  
31  
32  
33  
34  
35  
36  
37  
38  
39  
40  
41  
42  
43  
44  
45  
46  
47  
48  
49  
50  
51  
52  
53  
54  
55  
56  
57  
58  
59  
60

|      |         |              |   |   |          |          |
|------|---------|--------------|---|---|----------|----------|
| 1 IT | 2020-14 | 3 IT-Northwe | 2 | 1 | #####    | #####    |
| 1 IT | 2020-14 | 3 IT-Northwe | 2 | 2 | 0        | 0        |
| 1 IT | 2020-14 | 3 IT-Northwe | 2 | 3 | #####    | #####    |
| 1 IT | 2020-14 | 3 IT-Northwe | 2 | 4 | 0        | 0        |
| 1 IT | 2020-14 | 3 IT-Northwe | 2 | 5 | 0        | 0        |
| 1 IT | 2020-14 | 3 IT-Northwe | 3 | 1 | #####    | #####    |
| 1 IT | 2020-14 | 3 IT-Northwe | 3 | 2 | 0        | 0        |
| 1 IT | 2020-14 | 3 IT-Northwe | 3 | 3 | #####    | #####    |
| 1 IT | 2020-14 | 3 IT-Northwe | 3 | 4 | 0        | 0        |
| 1 IT | 2020-14 | 3 IT-Northwe | 3 | 5 | #####    | #####    |
| 1 IT | 2020-14 | 3 IT-Overall | 1 | 1 | #####    | #####    |
| 1 IT | 2020-14 | 3 IT-Overall | 1 | 2 | #####    | #####    |
| 1 IT | 2020-14 | 3 IT-Overall | 1 | 3 | #####    | #####    |
| 1 IT | 2020-14 | 3 IT-Overall | 1 | 4 | #####    | #####    |
| 1 IT | 2020-14 | 3 IT-Overall | 1 | 5 | #####    | #####    |
| 1 IT | 2020-14 | 3 IT-Overall | 2 | 1 | #####    | #####    |
| 1 IT | 2020-14 | 3 IT-Overall | 2 | 2 | #####    | #####    |
| 1 IT | 2020-14 | 3 IT-Overall | 2 | 3 | #####    | #####    |
| 1 IT | 2020-14 | 3 IT-Overall | 2 | 4 | #####    | #####    |
| 1 IT | 2020-14 | 3 IT-Overall | 2 | 5 | #####    | #####    |
| 1 IT | 2020-14 | 3 IT-Overall | 3 | 1 | #####    | #####    |
| 1 IT | 2020-14 | 3 IT-Overall | 3 | 2 | #####    | #####    |
| 1 IT | 2020-14 | 3 IT-Overall | 3 | 3 | #####    | #####    |
| 1 IT | 2020-14 | 3 IT-Overall | 3 | 4 | #####    | #####    |
| 1 IT | 2020-14 | 3 IT-Overall | 3 | 5 | #####    | #####    |
| 1 IT | 2020-14 | 3 IT-South   | 1 | 1 | #####    | #####    |
| 1 IT | 2020-14 | 3 IT-South   | 1 | 2 | 0        | 0        |
| 1 IT | 2020-14 | 3 IT-South   | 1 | 3 | #####    | #####    |
| 1 IT | 2020-14 | 3 IT-South   | 1 | 4 | #####    | #####    |
| 1 IT | 2020-14 | 3 IT-South   | 1 | 5 | 0        | 0        |
| 1 IT | 2020-14 | 3 IT-South   | 2 | 1 | #####    | #####    |
| 1 IT | 2020-14 | 3 IT-South   | 2 | 2 | 0        | 0        |
| 1 IT | 2020-14 | 3 IT-South   | 2 | 3 | #####    | #####    |
| 1 IT | 2020-14 | 3 IT-South   | 2 | 4 | #####    | #####    |
| 1 IT | 2020-14 | 3 IT-South   | 2 | 5 | 0        | 0        |
| 1 IT | 2020-14 | 3 IT-South   | 3 | 1 | 0        | 0        |
| 1 IT | 2020-14 | 3 IT-South   | 3 | 2 | 0        | 0        |
| 1 IT | 2020-14 | 3 IT-South   | 3 | 3 | 0        | 0        |
| 1 IT | 2020-14 | 3 IT-South   | 3 | 4 | 0        | 0        |
| 1 IT | 2020-14 | 3 IT-South   | 3 | 5 | 0        | 0        |
| 1 IT | 2020-14 | 4 IT-Central | 1 | 1 | #####    | #####    |
| 1 IT | 2020-14 | 4 IT-Central | 1 | 2 | #####    | #####    |
| 1 IT | 2020-14 | 4 IT-Central | 1 | 3 | #####    | #####    |
| 1 IT | 2020-14 | 4 IT-Central | 1 | 4 | 1.251589 | #####    |
| 1 IT | 2020-14 | 4 IT-Central | 1 | 5 | #####    | #####    |
| 1 IT | 2020-14 | 4 IT-Central | 2 | 1 | #####    | #####    |
| 1 IT | 2020-14 | 4 IT-Central | 2 | 2 | 0        | 0        |
| 1 IT | 2020-14 | 4 IT-Central | 2 | 3 | #####    | #####    |
| 1 IT | 2020-14 | 4 IT-Central | 2 | 4 | 1.12766  | #####    |
| 1 IT | 2020-14 | 4 IT-Central | 2 | 5 | 0        | 0        |
| 1 IT | 2020-14 | 4 IT-Central | 3 | 1 | 1.245374 | #####    |
| 1 IT | 2020-14 | 4 IT-Central | 3 | 2 | 0.9375   | #####    |
| 1 IT | 2020-14 | 4 IT-Central | 3 | 3 | 1.147059 | #####    |
| 1 IT | 2020-14 | 4 IT-Central | 3 | 4 | 1.409091 | #####    |
| 1 IT | 2020-14 | 4 IT-Central | 3 | 5 | 1.75     | 1.515643 |
| 1 IT | 2020-14 | 4 IT-Insular | 1 | 1 | 1.10487  | #####    |

|    |      |         |                |   |   |          |          |
|----|------|---------|----------------|---|---|----------|----------|
| 1  |      |         |                |   |   |          |          |
| 2  |      |         |                |   |   |          |          |
| 3  | 1 IT | 2020-14 | 4 IT-Insular   | 1 | 2 | #####    | #####    |
| 4  | 1 IT | 2020-14 | 4 IT-Insular   | 1 | 3 | 2.327746 | 1.112049 |
| 5  | 1 IT | 2020-14 | 4 IT-Insular   | 1 | 4 | #####    | #####    |
| 6  | 1 IT | 2020-14 | 4 IT-Insular   | 1 | 5 | 0        | 0        |
| 7  | 1 IT | 2020-14 | 4 IT-Insular   | 2 | 1 | #####    | #####    |
| 8  | 1 IT | 2020-14 | 4 IT-Insular   | 2 | 2 | 0.5      | #####    |
| 9  | 1 IT | 2020-14 | 4 IT-Insular   | 2 | 3 | 1.172414 | #####    |
| 10 | 1 IT | 2020-14 | 4 IT-Insular   | 2 | 4 | #####    | #####    |
| 11 | 1 IT | 2020-14 | 4 IT-Insular   | 2 | 5 | 0        | 0        |
| 12 | 1 IT | 2020-14 | 4 IT-Insular   | 3 | 1 | 2.003195 | 1.128477 |
| 13 | 1 IT | 2020-14 | 4 IT-Insular   | 3 | 2 | 0        | 0        |
| 14 | 1 IT | 2020-14 | 4 IT-Insular   | 3 | 3 | 4.666667 | 2.704767 |
| 15 | 1 IT | 2020-14 | 4 IT-Insular   | 3 | 4 | #####    | #####    |
| 16 | 1 IT | 2020-14 | 4 IT-Northeast | 1 | 1 | #####    | #####    |
| 17 | 1 IT | 2020-14 | 4 IT-Northeast | 1 | 2 | #####    | #####    |
| 18 | 1 IT | 2020-14 | 4 IT-Northeast | 1 | 3 | 1.281844 | #####    |
| 19 | 1 IT | 2020-14 | 4 IT-Northeast | 1 | 4 | #####    | #####    |
| 20 | 1 IT | 2020-14 | 4 IT-Northeast | 1 | 5 | 0        | 0        |
| 21 | 1 IT | 2020-14 | 4 IT-Northeast | 2 | 1 | #####    | #####    |
| 22 | 1 IT | 2020-14 | 4 IT-Northeast | 2 | 2 | #####    | #####    |
| 23 | 1 IT | 2020-14 | 4 IT-Northeast | 2 | 3 | 1.635135 | #####    |
| 24 | 1 IT | 2020-14 | 4 IT-Northeast | 2 | 4 | 1.081633 | #####    |
| 25 | 1 IT | 2020-14 | 4 IT-Northeast | 2 | 5 | 0        | 0        |
| 26 | 1 IT | 2020-14 | 4 IT-Northeast | 3 | 1 | #####    | #####    |
| 27 | 1 IT | 2020-14 | 4 IT-Northeast | 3 | 2 | 0.4      | #####    |
| 28 | 1 IT | 2020-14 | 4 IT-Northeast | 3 | 3 | #####    | #####    |
| 29 | 1 IT | 2020-14 | 4 IT-Northeast | 3 | 4 | #####    | #####    |
| 30 | 1 IT | 2020-14 | 4 IT-Northeast | 3 | 5 | 0        | 0        |
| 31 | 1 IT | 2020-14 | 4 IT-Northeast | 3 | 1 | #####    | #####    |
| 32 | 1 IT | 2020-14 | 4 IT-Northeast | 1 | 2 | #####    | #####    |
| 33 | 1 IT | 2020-14 | 4 IT-Northeast | 1 | 3 | #####    | #####    |
| 34 | 1 IT | 2020-14 | 4 IT-Northeast | 1 | 4 | #####    | #####    |
| 35 | 1 IT | 2020-14 | 4 IT-Northeast | 1 | 5 | #####    | #####    |
| 36 | 1 IT | 2020-14 | 4 IT-Northeast | 1 | 1 | #####    | #####    |
| 37 | 1 IT | 2020-14 | 4 IT-Northeast | 2 | 2 | #####    | #####    |
| 38 | 1 IT | 2020-14 | 4 IT-Northeast | 2 | 3 | #####    | #####    |
| 39 | 1 IT | 2020-14 | 4 IT-Northeast | 2 | 4 | 0.5      | #####    |
| 40 | 1 IT | 2020-14 | 4 IT-Northeast | 2 | 5 | 0        | 0        |
| 41 | 1 IT | 2020-14 | 4 IT-Northeast | 3 | 1 | #####    | #####    |
| 42 | 1 IT | 2020-14 | 4 IT-Northeast | 3 | 2 | 0.04     | #####    |
| 43 | 1 IT | 2020-14 | 4 IT-Northeast | 3 | 3 | #####    | #####    |
| 44 | 1 IT | 2020-14 | 4 IT-Northeast | 3 | 4 | #####    | #####    |
| 45 | 1 IT | 2020-14 | 4 IT-Northeast | 3 | 5 | #####    | #####    |
| 46 | 1 IT | 2020-14 | 4 IT-Northeast | 3 | 1 | #####    | #####    |
| 47 | 1 IT | 2020-14 | 4 IT-Overall   | 1 | 2 | #####    | #####    |
| 48 | 1 IT | 2020-14 | 4 IT-Overall   | 1 | 3 | #####    | #####    |
| 49 | 1 IT | 2020-14 | 4 IT-Overall   | 1 | 4 | #####    | #####    |
| 50 | 1 IT | 2020-14 | 4 IT-Overall   | 1 | 5 | #####    | #####    |
| 51 | 1 IT | 2020-14 | 4 IT-Overall   | 1 | 1 | #####    | #####    |
| 52 | 1 IT | 2020-14 | 4 IT-Overall   | 2 | 2 | #####    | #####    |
| 53 | 1 IT | 2020-14 | 4 IT-Overall   | 2 | 3 | #####    | #####    |
| 54 | 1 IT | 2020-14 | 4 IT-Overall   | 2 | 4 | #####    | #####    |
| 55 | 1 IT | 2020-14 | 4 IT-Overall   | 2 | 5 | 0        | 0        |
| 56 | 1 IT | 2020-14 | 4 IT-Overall   | 2 | 1 | #####    | #####    |
| 57 | 1 IT | 2020-14 | 4 IT-Overall   | 3 | 2 | #####    | #####    |
| 58 | 1 IT | 2020-14 | 4 IT-Overall   | 3 | 3 | #####    | #####    |
| 59 | 1 IT | 2020-14 | 4 IT-Overall   | 3 | 4 | #####    | #####    |
| 60 | 1 IT | 2020-14 | 4 IT-Overall   | 3 | 5 | #####    | #####    |

1  
2  
3  
4  
5  
6  
7  
8  
9  
10  
11  
12  
13  
14  
15  
16  
17  
18  
19  
20  
21  
22  
23  
24  
25  
26  
27  
28  
29  
30  
31  
32  
33  
34  
35  
36  
37  
38  
39  
40  
41  
42  
43  
44  
45  
46  
47  
48  
49  
50  
51  
52  
53  
54  
55  
56  
57  
58  
59  
60

|      |         |                |   |   |          |          |
|------|---------|----------------|---|---|----------|----------|
| 1 IT | 2020-14 | 4 IT-Overall   | 3 | 4 | #####    | #####    |
| 1 IT | 2020-14 | 4 IT-Overall   | 3 | 5 | #####    | #####    |
| 1 IT | 2020-14 | 4 IT-South     | 1 | 1 | #####    | #####    |
| 1 IT | 2020-14 | 4 IT-South     | 1 | 2 | 0        | 0        |
| 1 IT | 2020-14 | 4 IT-South     | 1 | 3 | #####    | #####    |
| 1 IT | 2020-14 | 4 IT-South     | 1 | 4 | #####    | #####    |
| 1 IT | 2020-14 | 4 IT-South     | 1 | 5 | 0        | 0        |
| 1 IT | 2020-14 | 4 IT-South     | 2 | 1 | #####    | #####    |
| 1 IT | 2020-14 | 4 IT-South     | 2 | 2 | 0        | 0        |
| 1 IT | 2020-14 | 4 IT-South     | 2 | 3 | #####    | #####    |
| 1 IT | 2020-14 | 4 IT-South     | 2 | 4 | #####    | #####    |
| 1 IT | 2020-14 | 4 IT-South     | 2 | 5 | 0        | 0        |
| 1 IT | 2020-14 | 4 IT-South     | 3 | 1 | #####    | #####    |
| 1 IT | 2020-14 | 4 IT-South     | 3 | 2 | 0        | 0        |
| 1 IT | 2020-14 | 4 IT-South     | 3 | 3 | #####    | #####    |
| 1 IT | 2020-14 | 4 IT-South     | 3 | 4 | 0        | 0        |
| 1 IT | 2020-14 | 4 IT-South     | 3 | 5 | 0        | 0        |
| 1 IT | 2020-14 | 5 IT-Central   | 1 | 1 | #####    | #####    |
| 1 IT | 2020-14 | 5 IT-Central   | 1 | 2 | #####    | #####    |
| 1 IT | 2020-14 | 5 IT-Central   | 1 | 3 | 1.075602 | #####    |
| 1 IT | 2020-14 | 5 IT-Central   | 1 | 4 | #####    | #####    |
| 1 IT | 2020-14 | 5 IT-Central   | 1 | 5 | #####    | #####    |
| 1 IT | 2020-14 | 5 IT-Central   | 2 | 1 | #####    | #####    |
| 1 IT | 2020-14 | 5 IT-Central   | 2 | 2 | #####    | #####    |
| 1 IT | 2020-14 | 5 IT-Central   | 2 | 3 | #####    | #####    |
| 1 IT | 2020-14 | 5 IT-Central   | 2 | 4 | 0.5625   | #####    |
| 1 IT | 2020-14 | 5 IT-Central   | 2 | 5 | #####    | #####    |
| 1 IT | 2020-14 | 5 IT-Central   | 3 | 1 | 1.038751 | #####    |
| 1 IT | 2020-14 | 5 IT-Central   | 3 | 2 | 0.75     | #####    |
| 1 IT | 2020-14 | 5 IT-Central   | 3 | 3 | 1.257143 | #####    |
| 1 IT | 2020-14 | 5 IT-Central   | 3 | 4 | #####    | #####    |
| 1 IT | 2020-14 | 5 IT-Central   | 3 | 5 | 1.25     | #####    |
| 1 IT | 2020-14 | 5 IT-Insular   | 1 | 1 | #####    | #####    |
| 1 IT | 2020-14 | 5 IT-Insular   | 1 | 2 | #####    | #####    |
| 1 IT | 2020-14 | 5 IT-Insular   | 1 | 3 | 1.922498 | #####    |
| 1 IT | 2020-14 | 5 IT-Insular   | 1 | 4 | #####    | #####    |
| 1 IT | 2020-14 | 5 IT-Insular   | 1 | 5 | 0        | 0        |
| 1 IT | 2020-14 | 5 IT-Insular   | 2 | 1 | #####    | #####    |
| 1 IT | 2020-14 | 5 IT-Insular   | 2 | 2 | #####    | #####    |
| 1 IT | 2020-14 | 5 IT-Insular   | 2 | 3 | 1.193548 | #####    |
| 1 IT | 2020-14 | 5 IT-Insular   | 2 | 4 | #####    | #####    |
| 1 IT | 2020-14 | 5 IT-Insular   | 2 | 5 | 0        | 0        |
| 1 IT | 2020-14 | 5 IT-Insular   | 3 | 1 | 1.502396 | #####    |
| 1 IT | 2020-14 | 5 IT-Insular   | 3 | 2 | 0        | 0        |
| 1 IT | 2020-14 | 5 IT-Insular   | 3 | 3 | 3.5      | 1.409386 |
| 1 IT | 2020-14 | 5 IT-Insular   | 3 | 4 | 0.5      | #####    |
| 1 IT | 2020-14 | 5 IT-Northeast | 1 | 1 | #####    | #####    |
| 1 IT | 2020-14 | 5 IT-Northeast | 1 | 2 | #####    | #####    |
| 1 IT | 2020-14 | 5 IT-Northeast | 1 | 3 | 1.081328 | #####    |
| 1 IT | 2020-14 | 5 IT-Northeast | 1 | 4 | #####    | #####    |
| 1 IT | 2020-14 | 5 IT-Northeast | 1 | 5 | #####    | #####    |
| 1 IT | 2020-14 | 5 IT-Northeast | 2 | 1 | #####    | #####    |
| 1 IT | 2020-14 | 5 IT-Northeast | 2 | 2 | #####    | #####    |
| 1 IT | 2020-14 | 5 IT-Northeast | 2 | 3 | #####    | #####    |
| 1 IT | 2020-14 | 5 IT-Northeast | 2 | 4 | #####    | #####    |
| 1 IT | 2020-14 | 5 IT-Northeast | 2 | 5 | 1.05     | #####    |

|    |      |         |                |   |   |          |          |  |
|----|------|---------|----------------|---|---|----------|----------|--|
| 1  |      |         |                |   |   |          |          |  |
| 2  |      |         |                |   |   |          |          |  |
| 3  | 1 IT | 2020-14 | 5 IT-Northeast | 3 | 1 | #####    | 0.234968 |  |
| 4  | 1 IT | 2020-14 | 5 IT-Northeast | 3 | 2 | 0.75     | #####    |  |
| 5  | 1 IT | 2020-14 | 5 IT-Northeast | 3 | 3 | 1.285714 | #####    |  |
| 6  | 1 IT | 2020-14 | 5 IT-Northeast | 3 | 4 | 0.76     | #####    |  |
| 7  | 1 IT | 2020-14 | 5 IT-Northeast | 3 | 5 | #####    | #####    |  |
| 8  | 1 IT | 2020-14 | 5 IT-Northwest | 1 | 1 | #####    | #####    |  |
| 9  | 1 IT | 2020-14 | 5 IT-Northwest | 1 | 2 | #####    | #####    |  |
| 10 | 1 IT | 2020-14 | 5 IT-Northwest | 1 | 3 | 1.107384 | #####    |  |
| 11 | 1 IT | 2020-14 | 5 IT-Northwest | 1 | 4 | #####    | #####    |  |
| 12 | 1 IT | 2020-14 | 5 IT-Northwest | 1 | 5 | #####    | #####    |  |
| 13 | 1 IT | 2020-14 | 5 IT-Northwest | 2 | 1 | #####    | #####    |  |
| 14 | 1 IT | 2020-14 | 5 IT-Northwest | 2 | 2 | #####    | #####    |  |
| 15 | 1 IT | 2020-14 | 5 IT-Northwest | 2 | 3 | #####    | #####    |  |
| 16 | 1 IT | 2020-14 | 5 IT-Northwest | 2 | 4 | #####    | #####    |  |
| 17 | 1 IT | 2020-14 | 5 IT-Northwest | 2 | 5 | 0.55     | #####    |  |
| 18 | 1 IT | 2020-14 | 5 IT-Northwest | 3 | 1 | 1.143573 | #####    |  |
| 19 | 1 IT | 2020-14 | 5 IT-Northwest | 3 | 2 | #####    | #####    |  |
| 20 | 1 IT | 2020-14 | 5 IT-Northwest | 3 | 3 | 1.75     | #####    |  |
| 21 | 1 IT | 2020-14 | 5 IT-Northwest | 3 | 4 | 1.342105 | #####    |  |
| 22 | 1 IT | 2020-14 | 5 IT-Northwest | 3 | 5 | #####    | #####    |  |
| 23 | 1 IT | 2020-14 | 5 IT-Overall   | 1 | 1 | #####    | #####    |  |
| 24 | 1 IT | 2020-14 | 5 IT-Overall   | 1 | 2 | #####    | #####    |  |
| 25 | 1 IT | 2020-14 | 5 IT-Overall   | 1 | 3 | 1.083102 | #####    |  |
| 26 | 1 IT | 2020-14 | 5 IT-Overall   | 1 | 4 | #####    | #####    |  |
| 27 | 1 IT | 2020-14 | 5 IT-Overall   | 1 | 5 | #####    | #####    |  |
| 28 | 1 IT | 2020-14 | 5 IT-Overall   | 2 | 1 | #####    | #####    |  |
| 29 | 1 IT | 2020-14 | 5 IT-Overall   | 2 | 2 | #####    | #####    |  |
| 30 | 1 IT | 2020-14 | 5 IT-Overall   | 2 | 3 | #####    | #####    |  |
| 31 | 1 IT | 2020-14 | 5 IT-Overall   | 2 | 4 | #####    | #####    |  |
| 32 | 1 IT | 2020-14 | 5 IT-Overall   | 2 | 5 | #####    | #####    |  |
| 33 | 1 IT | 2020-14 | 5 IT-Overall   | 3 | 1 | 1.032683 | #####    |  |
| 34 | 1 IT | 2020-14 | 5 IT-Overall   | 3 | 2 | #####    | #####    |  |
| 35 | 1 IT | 2020-14 | 5 IT-Overall   | 3 | 3 | 1.482478 | #####    |  |
| 36 | 1 IT | 2020-14 | 5 IT-Overall   | 3 | 4 | #####    | #####    |  |
| 37 | 1 IT | 2020-14 | 5 IT-Overall   | 3 | 5 | #####    | #####    |  |
| 38 | 1 IT | 2020-14 | 5 IT-South     | 1 | 1 | #####    | #####    |  |
| 39 | 1 IT | 2020-14 | 5 IT-South     | 1 | 2 | #####    | #####    |  |
| 40 | 1 IT | 2020-14 | 5 IT-South     | 1 | 3 | #####    | #####    |  |
| 41 | 1 IT | 2020-14 | 5 IT-South     | 1 | 4 | #####    | #####    |  |
| 42 | 1 IT | 2020-14 | 5 IT-South     | 1 | 5 | 1.501937 | 1.115294 |  |
| 43 | 1 IT | 2020-14 | 5 IT-South     | 2 | 1 | #####    | #####    |  |
| 44 | 1 IT | 2020-14 | 5 IT-South     | 2 | 2 | #####    | #####    |  |
| 45 | 1 IT | 2020-14 | 5 IT-South     | 2 | 3 | #####    | #####    |  |
| 46 | 1 IT | 2020-14 | 5 IT-South     | 2 | 4 | #####    | #####    |  |
| 47 | 1 IT | 2020-14 | 5 IT-South     | 2 | 5 | 1.833333 | 1.584898 |  |
| 48 | 1 IT | 2020-14 | 5 IT-South     | 3 | 1 | #####    | #####    |  |
| 49 | 1 IT | 2020-14 | 5 IT-South     | 3 | 2 | 0        | 0        |  |
| 50 | 1 IT | 2020-14 | 5 IT-South     | 3 | 3 | 1.133333 | #####    |  |
| 51 | 1 IT | 2020-14 | 5 IT-South     | 3 | 4 | 0.5      | #####    |  |
| 52 | 1 IT | 2020-14 | 5 IT-South     | 3 | 5 | 0.75     | #####    |  |
| 53 | 1 IT | 2020-15 | 1 IT-Central   | 1 | 1 | 3.29433  | #####    |  |
| 54 | 1 IT | 2020-15 | 1 IT-Central   | 1 | 2 | 4.249485 | #####    |  |
| 55 | 1 IT | 2020-15 | 1 IT-Central   | 1 | 3 | 3.454762 | #####    |  |
| 56 | 1 IT | 2020-15 | 1 IT-Central   | 1 | 4 | 3.27437  | #####    |  |
| 57 | 1 IT | 2020-15 | 1 IT-Central   | 1 | 5 | 2.545785 | #####    |  |
| 58 | 1 IT | 2020-15 | 1 IT-Central   | 2 | 1 | 3.405922 | #####    |  |

1  
2  
3  
4  
5  
6  
7  
8  
9  
10  
11  
12  
13  
14  
15  
16  
17  
18  
19  
20  
21  
22  
23  
24  
25  
26  
27  
28  
29  
30  
31  
32  
33  
34  
35  
36  
37  
38  
39  
40  
41  
42  
43  
44  
45  
46  
47  
48  
49  
50  
51  
52  
53  
54  
55  
56  
57  
58  
59  
60

|      |         |                |   |   |          |          |
|------|---------|----------------|---|---|----------|----------|
| 1 IT | 2020-15 | 1 IT-Central   | 2 | 2 | 3.645161 | #####    |
| 1 IT | 2020-15 | 1 IT-Central   | 2 | 3 | 3.238806 | #####    |
| 1 IT | 2020-15 | 1 IT-Central   | 2 | 4 | 3.875    | #####    |
| 1 IT | 2020-15 | 1 IT-Central   | 2 | 5 | 2.875    | #####    |
| 1 IT | 2020-15 | 1 IT-Central   | 3 | 1 | 3.067794 | #####    |
| 1 IT | 2020-15 | 1 IT-Central   | 3 | 2 | 5.5      | 2.48064  |
| 1 IT | 2020-15 | 1 IT-Central   | 3 | 3 | 3.866667 | 1.243255 |
| 1 IT | 2020-15 | 1 IT-Central   | 3 | 4 | 2.083333 | #####    |
| 1 IT | 2020-15 | 1 IT-Central   | 3 | 5 | 1.8      | #####    |
| 1 IT | 2020-15 | 1 IT-Insular   | 1 | 1 | 2.626456 | #####    |
| 1 IT | 2020-15 | 1 IT-Insular   | 1 | 2 | 3.628025 | #####    |
| 1 IT | 2020-15 | 1 IT-Insular   | 1 | 3 | 3.035502 | #####    |
| 1 IT | 2020-15 | 1 IT-Insular   | 1 | 4 | 2.523633 | #####    |
| 1 IT | 2020-15 | 1 IT-Insular   | 1 | 5 | 1.367025 | #####    |
| 1 IT | 2020-15 | 1 IT-Insular   | 2 | 1 | 2.893351 | #####    |
| 1 IT | 2020-15 | 1 IT-Insular   | 2 | 2 | 3.933333 | #####    |
| 1 IT | 2020-15 | 1 IT-Insular   | 2 | 3 | 3.358974 | #####    |
| 1 IT | 2020-15 | 1 IT-Insular   | 2 | 4 | 2.777778 | #####    |
| 1 IT | 2020-15 | 1 IT-Insular   | 2 | 5 | 1.5      | #####    |
| 1 IT | 2020-15 | 1 IT-Insular   | 3 | 1 | 2.002354 | #####    |
| 1 IT | 2020-15 | 1 IT-Insular   | 3 | 2 | 2        | 0        |
| 1 IT | 2020-15 | 1 IT-Insular   | 3 | 3 | 2.375    | #####    |
| 1 IT | 2020-15 | 1 IT-Insular   | 3 | 4 | 2        | 1.000065 |
| 1 IT | 2020-15 | 1 IT-Insular   | 3 | 5 | 1        | 0        |
| 1 IT | 2020-15 | 1 IT-Northeast | 1 | 1 | 4.008061 | #####    |
| 1 IT | 2020-15 | 1 IT-Northeast | 1 | 2 | 4.78972  | #####    |
| 1 IT | 2020-15 | 1 IT-Northeast | 1 | 3 | 3.967575 | #####    |
| 1 IT | 2020-15 | 1 IT-Northeast | 1 | 4 | 3.828764 | #####    |
| 1 IT | 2020-15 | 1 IT-Northeast | 1 | 5 | 3.783394 | #####    |
| 1 IT | 2020-15 | 1 IT-Northeast | 2 | 1 | 4.185006 | #####    |
| 1 IT | 2020-15 | 1 IT-Northeast | 2 | 2 | 4.159091 | #####    |
| 1 IT | 2020-15 | 1 IT-Northeast | 2 | 3 | 4.190476 | #####    |
| 1 IT | 2020-15 | 1 IT-Northeast | 2 | 4 | 4.522727 | #####    |
| 1 IT | 2020-15 | 1 IT-Northeast | 2 | 5 | 3.5      | 1.079422 |
| 1 IT | 2020-15 | 1 IT-Northeast | 3 | 1 | 3.822106 | #####    |
| 1 IT | 2020-15 | 1 IT-Northeast | 3 | 2 | 5.583333 | 1.53424  |
| 1 IT | 2020-15 | 1 IT-Northeast | 3 | 3 | 3.769231 | #####    |
| 1 IT | 2020-15 | 1 IT-Northeast | 3 | 4 | 2.842105 | #####    |
| 1 IT | 2020-15 | 1 IT-Northeast | 3 | 5 | 4        | 1.160774 |
| 1 IT | 2020-15 | 1 IT-Northwest | 1 | 1 | 3.096403 | #####    |
| 1 IT | 2020-15 | 1 IT-Northwest | 1 | 2 | 3.763735 | #####    |
| 1 IT | 2020-15 | 1 IT-Northwest | 1 | 3 | 3.774534 | #####    |
| 1 IT | 2020-15 | 1 IT-Northwest | 1 | 4 | 3.534598 | #####    |
| 1 IT | 2020-15 | 1 IT-Northwest | 1 | 5 | 1.954108 | #####    |
| 1 IT | 2020-15 | 1 IT-Northwest | 2 | 1 | 2.908961 | #####    |
| 1 IT | 2020-15 | 1 IT-Northwest | 2 | 2 | 4.871795 | 1.094062 |
| 1 IT | 2020-15 | 1 IT-Northwest | 2 | 3 | 3.354839 | #####    |
| 1 IT | 2020-15 | 1 IT-Northwest | 2 | 4 | 3.022222 | #####    |
| 1 IT | 2020-15 | 1 IT-Northwest | 2 | 5 | 1.653846 | #####    |
| 1 IT | 2020-15 | 1 IT-Northwest | 3 | 1 | 3.283418 | #####    |
| 1 IT | 2020-15 | 1 IT-Northwest | 3 | 2 | 2.333333 | #####    |
| 1 IT | 2020-15 | 1 IT-Northwest | 3 | 3 | 4.216216 | #####    |
| 1 IT | 2020-15 | 1 IT-Northwest | 3 | 4 | 4.035714 | #####    |
| 1 IT | 2020-15 | 1 IT-Northwest | 3 | 5 | 2.222222 | #####    |
| 1 IT | 2020-15 | 1 IT-Overall   | 1 | 1 | 3.620029 | #####    |
| 1 IT | 2020-15 | 1 IT-Overall   | 1 | 2 | 4.228356 | #####    |



|    |      |         |              |   |   |          |          |  |
|----|------|---------|--------------|---|---|----------|----------|--|
| 1  |      |         |              |   |   |          |          |  |
| 2  |      |         |              |   |   |          |          |  |
| 3  | 1 IT | 2020-15 | 1 IT-Overall | 1 | 3 | 3.877557 | #####    |  |
| 4  | 1 IT | 2020-15 | 1 IT-Overall | 1 | 4 | 4.053966 | #####    |  |
| 5  | 1 IT | 2020-15 | 1 IT-Overall | 1 | 5 | 2.498823 | #####    |  |
| 6  | 1 IT | 2020-15 | 1 IT-Overall | 2 | 1 | 3.453765 | #####    |  |
| 7  | 1 IT | 2020-15 | 1 IT-Overall | 2 | 2 | 4.047394 | #####    |  |
| 8  | 1 IT | 2020-15 | 1 IT-Overall | 2 | 3 | 3.801475 | #####    |  |
| 9  | 1 IT | 2020-15 | 1 IT-Overall | 2 | 4 | 3.807333 | #####    |  |
| 10 | 1 IT | 2020-15 | 1 IT-Overall | 2 | 5 | 2.205904 | #####    |  |
| 11 | 1 IT | 2020-15 | 1 IT-Overall | 3 | 1 | 3.851379 | #####    |  |
| 12 | 1 IT | 2020-15 | 1 IT-Overall | 3 | 2 | 4.461675 | #####    |  |
| 13 | 1 IT | 2020-15 | 1 IT-Overall | 3 | 3 | 4.000563 | #####    |  |
| 14 | 1 IT | 2020-15 | 1 IT-Overall | 3 | 4 | 4.413177 | 1.120379 |  |
| 15 | 1 IT | 2020-15 | 1 IT-Overall | 3 | 5 | 2.836162 | #####    |  |
| 16 | 1 IT | 2020-15 | 1 IT-South   | 1 | 1 | 4.638338 | #####    |  |
| 17 | 1 IT | 2020-15 | 1 IT-South   | 1 | 2 | 4.354554 | 1.100296 |  |
| 18 | 1 IT | 2020-15 | 1 IT-South   | 1 | 3 | 4.92783  | #####    |  |
| 19 | 1 IT | 2020-15 | 1 IT-South   | 1 | 4 | 5.850051 | 1.67021  |  |
| 20 | 1 IT | 2020-15 | 1 IT-South   | 1 | 5 | 2.858906 | #####    |  |
| 21 | 1 IT | 2020-15 | 1 IT-South   | 2 | 1 | 3.817694 | #####    |  |
| 22 | 1 IT | 2020-15 | 1 IT-South   | 2 | 2 | 3.363636 | #####    |  |
| 23 | 1 IT | 2020-15 | 1 IT-South   | 2 | 3 | 4.619048 | #####    |  |
| 24 | 1 IT | 2020-15 | 1 IT-South   | 2 | 4 | 4.296296 | #####    |  |
| 25 | 1 IT | 2020-15 | 1 IT-South   | 2 | 5 | 2        | #####    |  |
| 26 | 1 IT | 2020-15 | 1 IT-South   | 3 | 1 | 5.982158 | 1.612866 |  |
| 27 | 1 IT | 2020-15 | 1 IT-South   | 3 | 2 | 5        | 1.767882 |  |
| 28 | 1 IT | 2020-15 | 1 IT-South   | 3 | 3 | 6.666667 | 3.030904 |  |
| 29 | 1 IT | 2020-15 | 1 IT-South   | 3 | 4 | 8.285714 | 3.890136 |  |
| 30 | 1 IT | 2020-15 | 1 IT-South   | 3 | 5 | 3.833333 | 1.382854 |  |
| 31 | 1 IT | 2020-15 | 2 IT-Central | 1 | 1 | 1.814211 | #####    |  |
| 32 | 1 IT | 2020-15 | 2 IT-Central | 1 | 2 | 3.297992 | #####    |  |
| 33 | 1 IT | 2020-15 | 2 IT-Central | 1 | 3 | 1.709316 | #####    |  |
| 34 | 1 IT | 2020-15 | 2 IT-Central | 1 | 4 | 1.64407  | #####    |  |
| 35 | 1 IT | 2020-15 | 2 IT-Central | 1 | 5 | 1.321407 | #####    |  |
| 36 | 1 IT | 2020-15 | 2 IT-Central | 2 | 1 | 1.846667 | #####    |  |
| 37 | 1 IT | 2020-15 | 2 IT-Central | 2 | 2 | 3.4375   | #####    |  |
| 38 | 1 IT | 2020-15 | 2 IT-Central | 2 | 3 | 1.514706 | #####    |  |
| 39 | 1 IT | 2020-15 | 2 IT-Central | 2 | 4 | 1.833333 | #####    |  |
| 40 | 1 IT | 2020-15 | 2 IT-Central | 2 | 5 | 1.375    | #####    |  |
| 41 | 1 IT | 2020-15 | 2 IT-Central | 3 | 1 | 1.748159 | #####    |  |
| 42 | 1 IT | 2020-15 | 2 IT-Central | 3 | 2 | 3        | #####    |  |
| 43 | 1 IT | 2020-15 | 2 IT-Central | 3 | 3 | 2.0625   | #####    |  |
| 44 | 1 IT | 2020-15 | 2 IT-Central | 3 | 4 | 1.25     | #####    |  |
| 45 | 1 IT | 2020-15 | 2 IT-Central | 3 | 5 | 1.2      | #####    |  |
| 46 | 1 IT | 2020-15 | 2 IT-Insular | 1 | 1 | 1.790149 | #####    |  |
| 47 | 1 IT | 2020-15 | 2 IT-Insular | 1 | 2 | 2.785943 | #####    |  |
| 48 | 1 IT | 2020-15 | 2 IT-Insular | 1 | 3 | 1.976523 | #####    |  |
| 49 | 1 IT | 2020-15 | 2 IT-Insular | 1 | 4 | 1.768701 | #####    |  |
| 50 | 1 IT | 2020-15 | 2 IT-Insular | 1 | 5 | #####    | #####    |  |
| 51 | 1 IT | 2020-15 | 2 IT-Insular | 2 | 1 | 1.830287 | #####    |  |
| 52 | 1 IT | 2020-15 | 2 IT-Insular | 2 | 2 | 2.933333 | #####    |  |
| 53 | 1 IT | 2020-15 | 2 IT-Insular | 2 | 3 | 2.025    | #####    |  |
| 54 | 1 IT | 2020-15 | 2 IT-Insular | 2 | 4 | 1.777778 | #####    |  |
| 55 | 1 IT | 2020-15 | 2 IT-Insular | 2 | 5 | #####    | #####    |  |
| 56 | 1 IT | 2020-15 | 2 IT-Insular | 3 | 1 | 1.695358 | #####    |  |
| 57 | 1 IT | 2020-15 | 2 IT-Insular | 3 | 2 | 2        | 0        |  |
| 58 | 1 IT | 2020-15 | 2 IT-Insular | 3 | 3 | 1.875    | #####    |  |
| 59 | 1 IT | 2020-15 | 2 IT-Insular | 3 | 3 | 1.875    | #####    |  |
| 60 | 1 IT | 2020-15 | 2 IT-Insular | 3 | 3 | 1.875    | #####    |  |

1  
2  
3  
4  
5  
6  
7  
8  
9  
10  
11  
12  
13  
14  
15  
16  
17  
18  
19  
20  
21  
22  
23  
24  
25  
26  
27  
28  
29  
30  
31  
32  
33  
34  
35  
36  
37  
38  
39  
40  
41  
42  
43  
44  
45  
46  
47  
48  
49  
50  
51  
52  
53  
54  
55  
56  
57  
58  
59  
60

|      |         |                |   |   |          |       |
|------|---------|----------------|---|---|----------|-------|
| 1 IT | 2020-15 | 2 IT-Insular   | 3 | 4 | 1.75     | ##### |
| 1 IT | 2020-15 | 2 IT-Insular   | 3 | 5 | 1        | 0     |
| 1 IT | 2020-15 | 2 IT-Northeast | 1 | 1 | 1.890351 | ##### |
| 1 IT | 2020-15 | 2 IT-Northeast | 1 | 2 | 3.028609 | ##### |
| 1 IT | 2020-15 | 2 IT-Northeast | 1 | 3 | 1.803419 | ##### |
| 1 IT | 2020-15 | 2 IT-Northeast | 1 | 4 | 1.436551 | ##### |
| 1 IT | 2020-15 | 2 IT-Northeast | 1 | 5 | 1.96059  | ##### |
| 1 IT | 2020-15 | 2 IT-Northeast | 2 | 1 | 1.87944  | ##### |
| 1 IT | 2020-15 | 2 IT-Northeast | 2 | 2 | 3.25     | ##### |
| 1 IT | 2020-15 | 2 IT-Northeast | 2 | 3 | 1.757576 | ##### |
| 1 IT | 2020-15 | 2 IT-Northeast | 2 | 4 | 1.422222 | ##### |
| 1 IT | 2020-15 | 2 IT-Northeast | 2 | 5 | 1.8      | ##### |
| 1 IT | 2020-15 | 2 IT-Northeast | 3 | 1 | 1.901606 | ##### |
| 1 IT | 2020-15 | 2 IT-Northeast | 3 | 2 | 2.75     | ##### |
| 1 IT | 2020-15 | 2 IT-Northeast | 3 | 3 | 1.846154 | ##### |
| 1 IT | 2020-15 | 2 IT-Northeast | 3 | 4 | 1.454545 | ##### |
| 1 IT | 2020-15 | 2 IT-Northeast | 3 | 5 | 2.083333 | ##### |
| 1 IT | 2020-15 | 2 IT-Northwest | 1 | 1 | 1.517684 | ##### |
| 1 IT | 2020-15 | 2 IT-Northwest | 1 | 2 | 2.484176 | ##### |
| 1 IT | 2020-15 | 2 IT-Northwest | 1 | 3 | 1.472252 | ##### |
| 1 IT | 2020-15 | 2 IT-Northwest | 1 | 4 | 1.415734 | ##### |
| 1 IT | 2020-15 | 2 IT-Northwest | 1 | 5 | 1.317324 | ##### |
| 1 IT | 2020-15 | 2 IT-Northwest | 2 | 1 | 1.444674 | ##### |
| 1 IT | 2020-15 | 2 IT-Northwest | 2 | 2 | 3        | ##### |
| 1 IT | 2020-15 | 2 IT-Northwest | 2 | 3 | 1.53     | ##### |
| 1 IT | 2020-15 | 2 IT-Northwest | 2 | 4 | 1.23913  | ##### |
| 1 IT | 2020-15 | 2 IT-Northwest | 2 | 5 | #####    | ##### |
| 1 IT | 2020-15 | 2 IT-Northwest | 3 | 1 | 1.591638 | ##### |
| 1 IT | 2020-15 | 2 IT-Northwest | 3 | 2 | 1.75     | ##### |
| 1 IT | 2020-15 | 2 IT-Northwest | 3 | 3 | 1.410256 | ##### |
| 1 IT | 2020-15 | 2 IT-Northwest | 3 | 4 | 1.586207 | ##### |
| 1 IT | 2020-15 | 2 IT-Northwest | 3 | 5 | 1.703704 | ##### |
| 1 IT | 2020-15 | 2 IT-Overall   | 1 | 1 | 1.781397 | ##### |
| 1 IT | 2020-15 | 2 IT-Overall   | 1 | 2 | 2.811945 | ##### |
| 1 IT | 2020-15 | 2 IT-Overall   | 1 | 3 | 1.741151 | ##### |
| 1 IT | 2020-15 | 2 IT-Overall   | 1 | 4 | 1.673658 | ##### |
| 1 IT | 2020-15 | 2 IT-Overall   | 1 | 5 | 1.451557 | ##### |
| 1 IT | 2020-15 | 2 IT-Overall   | 2 | 1 | 1.77073  | ##### |
| 1 IT | 2020-15 | 2 IT-Overall   | 2 | 2 | 3.164114 | ##### |
| 1 IT | 2020-15 | 2 IT-Overall   | 2 | 3 | 1.769346 | ##### |
| 1 IT | 2020-15 | 2 IT-Overall   | 2 | 4 | 1.686001 | ##### |
| 1 IT | 2020-15 | 2 IT-Overall   | 2 | 5 | 1.149132 | ##### |
| 1 IT | 2020-15 | 2 IT-Overall   | 3 | 1 | 1.796228 | ##### |
| 1 IT | 2020-15 | 2 IT-Overall   | 3 | 2 | 2.342949 | ##### |
| 1 IT | 2020-15 | 2 IT-Overall   | 3 | 3 | 1.695516 | ##### |
| 1 IT | 2020-15 | 2 IT-Overall   | 3 | 4 | 1.656075 | ##### |
| 1 IT | 2020-15 | 2 IT-Overall   | 3 | 5 | 1.799843 | ##### |
| 1 IT | 2020-15 | 2 IT-South     | 1 | 1 | 1.997497 | ##### |
| 1 IT | 2020-15 | 2 IT-South     | 1 | 2 | 2.581688 | ##### |
| 1 IT | 2020-15 | 2 IT-South     | 1 | 3 | 1.939904 | ##### |
| 1 IT | 2020-15 | 2 IT-South     | 1 | 4 | 2.100863 | ##### |
| 1 IT | 2020-15 | 2 IT-South     | 1 | 5 | 1.605633 | ##### |
| 1 IT | 2020-15 | 2 IT-South     | 2 | 1 | 1.939474 | ##### |
| 1 IT | 2020-15 | 2 IT-South     | 2 | 2 | 3.090909 | ##### |
| 1 IT | 2020-15 | 2 IT-South     | 2 | 3 | 2.047619 | ##### |
| 1 IT | 2020-15 | 2 IT-South     | 2 | 4 | 2.074074 | ##### |

|    |      |         |                |   |   |          |          |  |
|----|------|---------|----------------|---|---|----------|----------|--|
| 1  |      |         |                |   |   |          |          |  |
| 2  |      |         |                |   |   |          |          |  |
| 3  | 1 IT | 2020-15 | 2 IT-South     | 2 | 5 | 1.111111 | #####    |  |
| 4  | 1 IT | 2020-15 | 2 IT-South     | 3 | 1 | 2.092512 | #####    |  |
| 5  | 1 IT | 2020-15 | 2 IT-South     | 3 | 2 | 2.25     | #####    |  |
| 6  | 1 IT | 2020-15 | 2 IT-South     | 3 | 3 | 1.333333 | 1.088733 |  |
| 7  | 1 IT | 2020-15 | 2 IT-South     | 3 | 4 | 2.142857 | #####    |  |
| 8  | 1 IT | 2020-15 | 2 IT-South     | 3 | 5 | 2.166667 | #####    |  |
| 9  | 1 IT | 2020-15 | 3 IT-Central   | 1 | 1 | #####    | #####    |  |
| 10 | 1 IT | 2020-15 | 3 IT-Central   | 1 | 2 | 0        | 0        |  |
| 11 | 1 IT | 2020-15 | 3 IT-Central   | 1 | 3 | 0        | 0        |  |
| 12 | 1 IT | 2020-15 | 3 IT-Central   | 1 | 4 | 0        | 0        |  |
| 13 | 1 IT | 2020-15 | 3 IT-Central   | 1 | 5 | #####    | #####    |  |
| 14 | 1 IT | 2020-15 | 3 IT-Central   | 2 | 1 | #####    | #####    |  |
| 15 | 1 IT | 2020-15 | 3 IT-Central   | 2 | 2 | 0        | 0        |  |
| 16 | 1 IT | 2020-15 | 3 IT-Central   | 2 | 3 | 0        | 0        |  |
| 17 | 1 IT | 2020-15 | 3 IT-Central   | 2 | 4 | 0        | 0        |  |
| 18 | 1 IT | 2020-15 | 3 IT-Central   | 2 | 5 | 0.125    | #####    |  |
| 19 | 1 IT | 2020-15 | 3 IT-Central   | 3 | 1 | 0        | 0        |  |
| 20 | 1 IT | 2020-15 | 3 IT-Central   | 3 | 2 | 0        | 0        |  |
| 21 | 1 IT | 2020-15 | 3 IT-Central   | 3 | 3 | 0        | 0        |  |
| 22 | 1 IT | 2020-15 | 3 IT-Central   | 3 | 4 | 0        | 0        |  |
| 23 | 1 IT | 2020-15 | 3 IT-Central   | 3 | 5 | 0        | 0        |  |
| 24 | 1 IT | 2020-15 | 3 IT-Insular   | 1 | 1 | 0        | 0        |  |
| 25 | 1 IT | 2020-15 | 3 IT-Insular   | 1 | 2 | 0        | 0        |  |
| 26 | 1 IT | 2020-15 | 3 IT-Insular   | 1 | 3 | 0        | 0        |  |
| 27 | 1 IT | 2020-15 | 3 IT-Insular   | 1 | 4 | 0        | 0        |  |
| 28 | 1 IT | 2020-15 | 3 IT-Insular   | 1 | 5 | 0        | 0        |  |
| 29 | 1 IT | 2020-15 | 3 IT-Insular   | 2 | 1 | 0        | 0        |  |
| 30 | 1 IT | 2020-15 | 3 IT-Insular   | 2 | 2 | 0        | 0        |  |
| 31 | 1 IT | 2020-15 | 3 IT-Insular   | 2 | 3 | 0        | 0        |  |
| 32 | 1 IT | 2020-15 | 3 IT-Insular   | 2 | 4 | 0        | 0        |  |
| 33 | 1 IT | 2020-15 | 3 IT-Insular   | 2 | 5 | 0        | 0        |  |
| 34 | 1 IT | 2020-15 | 3 IT-Insular   | 3 | 1 | 0        | 0        |  |
| 35 | 1 IT | 2020-15 | 3 IT-Insular   | 3 | 2 | 0        | 0        |  |
| 36 | 1 IT | 2020-15 | 3 IT-Insular   | 3 | 3 | 0        | 0        |  |
| 37 | 1 IT | 2020-15 | 3 IT-Insular   | 3 | 3 | 0        | 0        |  |
| 38 | 1 IT | 2020-15 | 3 IT-Insular   | 3 | 4 | 0        | 0        |  |
| 39 | 1 IT | 2020-15 | 3 IT-Insular   | 3 | 5 | 0        | 0        |  |
| 40 | 1 IT | 2020-15 | 3 IT-Northeast | 1 | 1 | #####    | #####    |  |
| 41 | 1 IT | 2020-15 | 3 IT-Northeast | 1 | 2 | #####    | #####    |  |
| 42 | 1 IT | 2020-15 | 3 IT-Northeast | 1 | 3 | #####    | #####    |  |
| 43 | 1 IT | 2020-15 | 3 IT-Northeast | 1 | 4 | #####    | #####    |  |
| 44 | 1 IT | 2020-15 | 3 IT-Northeast | 1 | 5 | #####    | #####    |  |
| 45 | 1 IT | 2020-15 | 3 IT-Northeast | 2 | 1 | #####    | #####    |  |
| 46 | 1 IT | 2020-15 | 3 IT-Northeast | 2 | 2 | #####    | #####    |  |
| 47 | 1 IT | 2020-15 | 3 IT-Northeast | 2 | 3 | #####    | #####    |  |
| 48 | 1 IT | 2020-15 | 3 IT-Northeast | 2 | 4 | #####    | #####    |  |
| 49 | 1 IT | 2020-15 | 3 IT-Northeast | 2 | 5 | 0.1      | #####    |  |
| 50 | 1 IT | 2020-15 | 3 IT-Northeast | 3 | 1 | 0        | 0        |  |
| 51 | 1 IT | 2020-15 | 3 IT-Northeast | 3 | 2 | 0        | 0        |  |
| 52 | 1 IT | 2020-15 | 3 IT-Northeast | 3 | 3 | 0        | 0        |  |
| 53 | 1 IT | 2020-15 | 3 IT-Northeast | 3 | 4 | 0        | 0        |  |
| 54 | 1 IT | 2020-15 | 3 IT-Northeast | 3 | 5 | 0        | 0        |  |
| 55 | 1 IT | 2020-15 | 3 IT-Northwest | 1 | 1 | #####    | #####    |  |
| 56 | 1 IT | 2020-15 | 3 IT-Northwest | 1 | 2 | #####    | #####    |  |
| 57 | 1 IT | 2020-15 | 3 IT-Northwest | 1 | 3 | 0        | 0        |  |
| 58 | 1 IT | 2020-15 | 3 IT-Northwest | 1 | 4 | #####    | #####    |  |
| 59 | 1 IT | 2020-15 | 3 IT-Northwest | 1 | 5 | #####    | #####    |  |
| 60 | 1 IT | 2020-15 | 3 IT-Northwest | 1 | 5 | #####    | #####    |  |

1  
2  
3  
4  
5  
6  
7  
8  
9  
10  
11  
12  
13  
14  
15  
16  
17  
18  
19  
20  
21  
22  
23  
24  
25  
26  
27  
28  
29  
30  
31  
32  
33  
34  
35  
36  
37  
38  
39  
40  
41  
42  
43  
44  
45  
46  
47  
48  
49  
50  
51  
52  
53  
54  
55  
56  
57  
58  
59  
60

|      |         |              |   |   |          |       |
|------|---------|--------------|---|---|----------|-------|
| 1 IT | 2020-15 | 3 IT-Northwe | 2 | 1 | #####    | ##### |
| 1 IT | 2020-15 | 3 IT-Northwe | 2 | 2 | #####    | ##### |
| 1 IT | 2020-15 | 3 IT-Northwe | 2 | 3 | 0        | 0     |
| 1 IT | 2020-15 | 3 IT-Northwe | 2 | 4 | #####    | ##### |
| 1 IT | 2020-15 | 3 IT-Northwe | 2 | 5 | #####    | ##### |
| 1 IT | 2020-15 | 3 IT-Northwe | 3 | 1 | 0        | 0     |
| 1 IT | 2020-15 | 3 IT-Northwe | 3 | 2 | 0        | 0     |
| 1 IT | 2020-15 | 3 IT-Northwe | 3 | 3 | 0        | 0     |
| 1 IT | 2020-15 | 3 IT-Northwe | 3 | 4 | 0        | 0     |
| 1 IT | 2020-15 | 3 IT-Northwe | 3 | 5 | 0        | 0     |
| 1 IT | 2020-15 | 3 IT-Overall | 1 | 1 | #####    | ##### |
| 1 IT | 2020-15 | 3 IT-Overall | 1 | 2 | #####    | ##### |
| 1 IT | 2020-15 | 3 IT-Overall | 1 | 3 | #####    | ##### |
| 1 IT | 2020-15 | 3 IT-Overall | 1 | 4 | #####    | ##### |
| 1 IT | 2020-15 | 3 IT-Overall | 1 | 5 | #####    | ##### |
| 1 IT | 2020-15 | 3 IT-Overall | 2 | 1 | #####    | ##### |
| 1 IT | 2020-15 | 3 IT-Overall | 2 | 2 | #####    | ##### |
| 1 IT | 2020-15 | 3 IT-Overall | 2 | 3 | #####    | ##### |
| 1 IT | 2020-15 | 3 IT-Overall | 2 | 4 | #####    | ##### |
| 1 IT | 2020-15 | 3 IT-Overall | 2 | 5 | #####    | ##### |
| 1 IT | 2020-15 | 3 IT-Overall | 3 | 1 | #####    | ##### |
| 1 IT | 2020-15 | 3 IT-Overall | 3 | 2 | #####    | ##### |
| 1 IT | 2020-15 | 3 IT-Overall | 3 | 3 | 0        | 0     |
| 1 IT | 2020-15 | 3 IT-Overall | 3 | 4 | 0        | 0     |
| 1 IT | 2020-15 | 3 IT-Overall | 3 | 5 | 0        | 0     |
| 1 IT | 2020-15 | 3 IT-South   | 1 | 1 | #####    | ##### |
| 1 IT | 2020-15 | 3 IT-South   | 1 | 2 | #####    | ##### |
| 1 IT | 2020-15 | 3 IT-South   | 1 | 3 | 0        | 0     |
| 1 IT | 2020-15 | 3 IT-South   | 1 | 4 | 0        | 0     |
| 1 IT | 2020-15 | 3 IT-South   | 1 | 5 | 0        | 0     |
| 1 IT | 2020-15 | 3 IT-South   | 2 | 1 | #####    | ##### |
| 1 IT | 2020-15 | 3 IT-South   | 2 | 2 | #####    | ##### |
| 1 IT | 2020-15 | 3 IT-South   | 2 | 3 | 0        | 0     |
| 1 IT | 2020-15 | 3 IT-South   | 2 | 4 | 0        | 0     |
| 1 IT | 2020-15 | 3 IT-South   | 2 | 5 | 0        | 0     |
| 1 IT | 2020-15 | 3 IT-South   | 3 | 1 | #####    | ##### |
| 1 IT | 2020-15 | 3 IT-South   | 3 | 2 | 0.125    | ##### |
| 1 IT | 2020-15 | 3 IT-South   | 3 | 3 | 0        | 0     |
| 1 IT | 2020-15 | 3 IT-South   | 3 | 4 | 0        | 0     |
| 1 IT | 2020-15 | 3 IT-South   | 3 | 5 | 0        | 0     |
| 1 IT | 2020-15 | 4 IT-Central | 1 | 1 | #####    | ##### |
| 1 IT | 2020-15 | 4 IT-Central | 1 | 2 | 0        | 0     |
| 1 IT | 2020-15 | 4 IT-Central | 1 | 3 | #####    | ##### |
| 1 IT | 2020-15 | 4 IT-Central | 1 | 4 | 1.019781 | ##### |
| 1 IT | 2020-15 | 4 IT-Central | 1 | 5 | #####    | ##### |
| 1 IT | 2020-15 | 4 IT-Central | 2 | 1 | #####    | ##### |
| 1 IT | 2020-15 | 4 IT-Central | 2 | 2 | 0        | 0     |
| 1 IT | 2020-15 | 4 IT-Central | 2 | 3 | #####    | ##### |
| 1 IT | 2020-15 | 4 IT-Central | 2 | 4 | 1.45     | ##### |
| 1 IT | 2020-15 | 4 IT-Central | 2 | 5 | 0.125    | ##### |
| 1 IT | 2020-15 | 4 IT-Central | 3 | 1 | #####    | ##### |
| 1 IT | 2020-15 | 4 IT-Central | 3 | 2 | 0        | 0     |
| 1 IT | 2020-15 | 4 IT-Central | 3 | 3 | 1        | ##### |
| 1 IT | 2020-15 | 4 IT-Central | 3 | 4 | #####    | ##### |
| 1 IT | 2020-15 | 4 IT-Central | 3 | 5 | 0        | 0     |
| 1 IT | 2020-15 | 4 IT-Insular | 1 | 1 | #####    | ##### |

|    |      |         |                |   |   |          |         |  |
|----|------|---------|----------------|---|---|----------|---------|--|
| 1  |      |         |                |   |   |          |         |  |
| 2  |      |         |                |   |   |          |         |  |
| 3  | 1 IT | 2020-15 | 4 IT-Insular   | 1 | 2 | 0        | 0       |  |
| 4  | 1 IT | 2020-15 | 4 IT-Insular   | 1 | 3 | #####    | #####   |  |
| 5  | 1 IT | 2020-15 | 4 IT-Insular   | 1 | 4 | #####    | #####   |  |
| 6  | 1 IT | 2020-15 | 4 IT-Insular   | 1 | 5 | 0        | 0       |  |
| 7  | 1 IT | 2020-15 | 4 IT-Insular   | 2 | 1 | #####    | #####   |  |
| 8  | 1 IT | 2020-15 | 4 IT-Insular   | 2 | 2 | 0        | 0       |  |
| 9  | 1 IT | 2020-15 | 4 IT-Insular   | 2 | 3 | #####    | #####   |  |
| 10 | 1 IT | 2020-15 | 4 IT-Insular   | 2 | 4 | #####    | #####   |  |
| 11 | 1 IT | 2020-15 | 4 IT-Insular   | 2 | 5 | 0        | 0       |  |
| 12 | 1 IT | 2020-15 | 4 IT-Insular   | 3 | 1 | #####    | #####   |  |
| 13 | 1 IT | 2020-15 | 4 IT-Insular   | 3 | 2 | 0        | 0       |  |
| 14 | 1 IT | 2020-15 | 4 IT-Insular   | 3 | 3 | 0.5      | #####   |  |
| 15 | 1 IT | 2020-15 | 4 IT-Insular   | 3 | 4 | 0        | 0       |  |
| 16 | 1 IT | 2020-15 | 4 IT-Insular   | 3 | 5 | 0        | 0       |  |
| 17 | 1 IT | 2020-15 | 4 IT-Northeast | 1 | 1 | 1.114851 | #####   |  |
| 18 | 1 IT | 2020-15 | 4 IT-Northeast | 1 | 2 | 1.186221 | #####   |  |
| 19 | 1 IT | 2020-15 | 4 IT-Northeast | 1 | 3 | 1.325514 | #####   |  |
| 20 | 1 IT | 2020-15 | 4 IT-Northeast | 1 | 4 | 1.272357 | #####   |  |
| 21 | 1 IT | 2020-15 | 4 IT-Northeast | 1 | 5 | #####    | #####   |  |
| 22 | 1 IT | 2020-15 | 4 IT-Northeast | 2 | 1 | 1.38571  | #####   |  |
| 23 | 1 IT | 2020-15 | 4 IT-Northeast | 2 | 2 | #####    | #####   |  |
| 24 | 1 IT | 2020-15 | 4 IT-Northeast | 2 | 3 | 1.777778 | #####   |  |
| 25 | 1 IT | 2020-15 | 4 IT-Northeast | 2 | 4 | 1.659091 | #####   |  |
| 26 | 1 IT | 2020-15 | 4 IT-Northeast | 2 | 5 | 1.1      | #####   |  |
| 27 | 1 IT | 2020-15 | 4 IT-Northeast | 3 | 1 | #####    | #####   |  |
| 28 | 1 IT | 2020-15 | 4 IT-Northeast | 3 | 2 | 2.25     | 1.36495 |  |
| 29 | 1 IT | 2020-15 | 4 IT-Northeast | 3 | 3 | #####    | #####   |  |
| 30 | 1 IT | 2020-15 | 4 IT-Northeast | 3 | 4 | 0.75     | #####   |  |
| 31 | 1 IT | 2020-15 | 4 IT-Northeast | 3 | 5 | 0        | 0       |  |
| 32 | 1 IT | 2020-15 | 4 IT-Northwest | 1 | 1 | #####    | #####   |  |
| 33 | 1 IT | 2020-15 | 4 IT-Northwest | 1 | 2 | #####    | #####   |  |
| 34 | 1 IT | 2020-15 | 4 IT-Northwest | 1 | 3 | 1.151673 | #####   |  |
| 35 | 1 IT | 2020-15 | 4 IT-Northwest | 1 | 4 | 1.131852 | #####   |  |
| 36 | 1 IT | 2020-15 | 4 IT-Northwest | 1 | 5 | #####    | #####   |  |
| 37 | 1 IT | 2020-15 | 4 IT-Northwest | 2 | 1 | #####    | #####   |  |
| 38 | 1 IT | 2020-15 | 4 IT-Northwest | 2 | 2 | #####    | #####   |  |
| 39 | 1 IT | 2020-15 | 4 IT-Northwest | 2 | 3 | #####    | #####   |  |
| 40 | 1 IT | 2020-15 | 4 IT-Northwest | 2 | 4 | 1.266667 | #####   |  |
| 41 | 1 IT | 2020-15 | 4 IT-Northwest | 2 | 5 | #####    | #####   |  |
| 42 | 1 IT | 2020-15 | 4 IT-Northwest | 3 | 1 | #####    | #####   |  |
| 43 | 1 IT | 2020-15 | 4 IT-Northwest | 3 | 2 | 0        | 0       |  |
| 44 | 1 IT | 2020-15 | 4 IT-Northwest | 3 | 3 | 1.324324 | #####   |  |
| 45 | 1 IT | 2020-15 | 4 IT-Northwest | 3 | 4 | 1        | #####   |  |
| 46 | 1 IT | 2020-15 | 4 IT-Northwest | 3 | 5 | #####    | #####   |  |
| 47 | 1 IT | 2020-15 | 4 IT-Overall   | 1 | 1 | #####    | #####   |  |
| 48 | 1 IT | 2020-15 | 4 IT-Overall   | 1 | 2 | #####    | #####   |  |
| 49 | 1 IT | 2020-15 | 4 IT-Overall   | 1 | 3 | 1.195166 | #####   |  |
| 50 | 1 IT | 2020-15 | 4 IT-Overall   | 1 | 4 | 1.243552 | #####   |  |
| 51 | 1 IT | 2020-15 | 4 IT-Overall   | 1 | 5 | #####    | #####   |  |
| 52 | 1 IT | 2020-15 | 4 IT-Overall   | 2 | 1 | #####    | #####   |  |
| 53 | 1 IT | 2020-15 | 4 IT-Overall   | 2 | 2 | #####    | #####   |  |
| 54 | 1 IT | 2020-15 | 4 IT-Overall   | 2 | 3 | 1.154395 | #####   |  |
| 55 | 1 IT | 2020-15 | 4 IT-Overall   | 2 | 4 | 1.193912 | #####   |  |
| 56 | 1 IT | 2020-15 | 4 IT-Overall   | 2 | 5 | #####    | #####   |  |
| 57 | 1 IT | 2020-15 | 4 IT-Overall   | 3 | 1 | #####    | #####   |  |
| 58 | 1 IT | 2020-15 | 4 IT-Overall   | 3 | 2 | 1.039471 | #####   |  |
| 59 | 1 IT | 2020-15 | 4 IT-Overall   | 3 | 2 | 1.039471 | #####   |  |
| 60 | 1 IT | 2020-15 | 4 IT-Overall   | 3 | 2 | 1.039471 | #####   |  |

1  
2  
3  
4  
5  
6  
7  
8  
9  
10  
11  
12  
13  
14  
15  
16  
17  
18  
19  
20  
21  
22  
23  
24  
25  
26  
27  
28  
29  
30  
31  
32  
33  
34  
35  
36  
37  
38  
39  
40  
41  
42  
43  
44  
45  
46  
47  
48  
49  
50  
51  
52  
53  
54  
55  
56  
57  
58  
59  
60

|      |         |                |   |   |          |          |
|------|---------|----------------|---|---|----------|----------|
| 1 IT | 2020-15 | 4 IT-Overall   | 3 | 3 | 1.261242 | #####    |
| 1 IT | 2020-15 | 4 IT-Overall   | 3 | 4 | 1.315109 | #####    |
| 1 IT | 2020-15 | 4 IT-Overall   | 3 | 5 | #####    | #####    |
| 1 IT | 2020-15 | 4 IT-South     | 1 | 1 | 1.283521 | #####    |
| 1 IT | 2020-15 | 4 IT-South     | 1 | 2 | #####    | #####    |
| 1 IT | 2020-15 | 4 IT-South     | 1 | 3 | 1.877001 | #####    |
| 1 IT | 2020-15 | 4 IT-South     | 1 | 4 | 1.890215 | 1.079932 |
| 1 IT | 2020-15 | 4 IT-South     | 1 | 5 | #####    | #####    |
| 1 IT | 2020-15 | 4 IT-South     | 2 | 1 | #####    | #####    |
| 1 IT | 2020-15 | 4 IT-South     | 2 | 2 | 0        | 0        |
| 1 IT | 2020-15 | 4 IT-South     | 2 | 3 | 1.5      | #####    |
| 1 IT | 2020-15 | 4 IT-South     | 2 | 4 | 1        | #####    |
| 1 IT | 2020-15 | 4 IT-South     | 2 | 5 | 0        | 0        |
| 1 IT | 2020-15 | 4 IT-South     | 3 | 1 | 1.97005  | 1.080202 |
| 1 IT | 2020-15 | 4 IT-South     | 3 | 2 | 1.5      | 1.159278 |
| 1 IT | 2020-15 | 4 IT-South     | 3 | 3 | 4        | 3.266198 |
| 1 IT | 2020-15 | 4 IT-South     | 3 | 4 | 3.285714 | 2.608745 |
| 1 IT | 2020-15 | 4 IT-South     | 3 | 5 | #####    | #####    |
| 1 IT | 2020-15 | 5 IT-Central   | 1 | 1 | #####    | #####    |
| 1 IT | 2020-15 | 5 IT-Central   | 1 | 2 | #####    | #####    |
| 1 IT | 2020-15 | 5 IT-Central   | 1 | 3 | #####    | #####    |
| 1 IT | 2020-15 | 5 IT-Central   | 1 | 4 | #####    | #####    |
| 1 IT | 2020-15 | 5 IT-Central   | 1 | 5 | 1.05094  | #####    |
| 1 IT | 2020-15 | 5 IT-Central   | 2 | 1 | #####    | #####    |
| 1 IT | 2020-15 | 5 IT-Central   | 2 | 2 | 0.28125  | #####    |
| 1 IT | 2020-15 | 5 IT-Central   | 2 | 3 | #####    | #####    |
| 1 IT | 2020-15 | 5 IT-Central   | 2 | 4 | #####    | #####    |
| 1 IT | 2020-15 | 5 IT-Central   | 2 | 5 | 1.25     | #####    |
| 1 IT | 2020-15 | 5 IT-Central   | 3 | 1 | #####    | #####    |
| 1 IT | 2020-15 | 5 IT-Central   | 3 | 2 | 2.5      | 2.282326 |
| 1 IT | 2020-15 | 5 IT-Central   | 3 | 3 | 0.75     | #####    |
| 1 IT | 2020-15 | 5 IT-Central   | 3 | 4 | #####    | #####    |
| 1 IT | 2020-15 | 5 IT-Central   | 3 | 5 | 0.6      | #####    |
| 1 IT | 2020-15 | 5 IT-Insular   | 1 | 1 | #####    | #####    |
| 1 IT | 2020-15 | 5 IT-Insular   | 1 | 2 | #####    | #####    |
| 1 IT | 2020-15 | 5 IT-Insular   | 1 | 3 | #####    | #####    |
| 1 IT | 2020-15 | 5 IT-Insular   | 1 | 4 | #####    | #####    |
| 1 IT | 2020-15 | 5 IT-Insular   | 1 | 5 | #####    | #####    |
| 1 IT | 2020-15 | 5 IT-Insular   | 2 | 1 | #####    | #####    |
| 1 IT | 2020-15 | 5 IT-Insular   | 2 | 2 | 1        | #####    |
| 1 IT | 2020-15 | 5 IT-Insular   | 2 | 3 | #####    | #####    |
| 1 IT | 2020-15 | 5 IT-Insular   | 2 | 4 | #####    | #####    |
| 1 IT | 2020-15 | 5 IT-Insular   | 2 | 5 | #####    | #####    |
| 1 IT | 2020-15 | 5 IT-Insular   | 3 | 1 | #####    | #####    |
| 1 IT | 2020-15 | 5 IT-Insular   | 3 | 2 | 0        | 0        |
| 1 IT | 2020-15 | 5 IT-Insular   | 3 | 3 | 0        | 0        |
| 1 IT | 2020-15 | 5 IT-Insular   | 3 | 4 | 0.25     | #####    |
| 1 IT | 2020-15 | 5 IT-Insular   | 3 | 5 | 0        | 0        |
| 1 IT | 2020-15 | 5 IT-Northeast | 1 | 1 | #####    | #####    |
| 1 IT | 2020-15 | 5 IT-Northeast | 1 | 2 | #####    | #####    |
| 1 IT | 2020-15 | 5 IT-Northeast | 1 | 3 | #####    | #####    |
| 1 IT | 2020-15 | 5 IT-Northeast | 1 | 4 | 1.065996 | #####    |
| 1 IT | 2020-15 | 5 IT-Northeast | 1 | 5 | 1.30295  | #####    |
| 1 IT | 2020-15 | 5 IT-Northeast | 2 | 1 | #####    | #####    |
| 1 IT | 2020-15 | 5 IT-Northeast | 2 | 2 | #####    | #####    |
| 1 IT | 2020-15 | 5 IT-Northeast | 2 | 3 | #####    | #####    |

|    |      |         |                |   |   |          |          |  |
|----|------|---------|----------------|---|---|----------|----------|--|
| 1  |      |         |                |   |   |          |          |  |
| 2  |      |         |                |   |   |          |          |  |
| 3  | 1 IT | 2020-15 | 5 IT-Northeast | 2 | 4 | 1.333333 | #####    |  |
| 4  | 1 IT | 2020-15 | 5 IT-Northeast | 2 | 5 | 0.5      | #####    |  |
| 5  | 1 IT | 2020-15 | 5 IT-Northeast | 3 | 1 | 1.076684 | #####    |  |
| 6  | 1 IT | 2020-15 | 5 IT-Northeast | 3 | 2 | #####    | #####    |  |
| 7  | 1 IT | 2020-15 | 5 IT-Northeast | 3 | 3 | 1        | #####    |  |
| 8  | 1 IT | 2020-15 | 5 IT-Northeast | 3 | 4 | #####    | #####    |  |
| 9  | 1 IT | 2020-15 | 5 IT-Northeast | 3 | 5 | 1.916667 | #####    |  |
| 10 | 1 IT | 2020-15 | 5 IT-Northwest | 1 | 1 | #####    | #####    |  |
| 11 | 1 IT | 2020-15 | 5 IT-Northwest | 1 | 2 | #####    | #####    |  |
| 12 | 1 IT | 2020-15 | 5 IT-Northwest | 1 | 3 | 1.110406 | #####    |  |
| 13 | 1 IT | 2020-15 | 5 IT-Northwest | 1 | 4 | #####    | #####    |  |
| 14 | 1 IT | 2020-15 | 5 IT-Northwest | 1 | 5 | #####    | #####    |  |
| 15 | 1 IT | 2020-15 | 5 IT-Northwest | 2 | 1 | #####    | #####    |  |
| 16 | 1 IT | 2020-15 | 5 IT-Northwest | 2 | 2 | #####    | #####    |  |
| 17 | 1 IT | 2020-15 | 5 IT-Northwest | 2 | 3 | #####    | #####    |  |
| 18 | 1 IT | 2020-15 | 5 IT-Northwest | 2 | 4 | #####    | #####    |  |
| 19 | 1 IT | 2020-15 | 5 IT-Northwest | 2 | 5 | #####    | #####    |  |
| 20 | 1 IT | 2020-15 | 5 IT-Northwest | 3 | 1 | #####    | #####    |  |
| 21 | 1 IT | 2020-15 | 5 IT-Northwest | 3 | 2 | #####    | #####    |  |
| 22 | 1 IT | 2020-15 | 5 IT-Northwest | 3 | 3 | 1.410256 | #####    |  |
| 23 | 1 IT | 2020-15 | 5 IT-Northwest | 3 | 4 | 1.433333 | #####    |  |
| 24 | 1 IT | 2020-15 | 5 IT-Northwest | 3 | 5 | #####    | #####    |  |
| 25 | 1 IT | 2020-15 | 5 IT-Northwest | 3 | 5 | #####    | #####    |  |
| 26 | 1 IT | 2020-15 | 5 IT-Overall   | 1 | 1 | #####    | #####    |  |
| 27 | 1 IT | 2020-15 | 5 IT-Overall   | 1 | 2 | #####    | #####    |  |
| 28 | 1 IT | 2020-15 | 5 IT-Overall   | 1 | 3 | #####    | #####    |  |
| 29 | 1 IT | 2020-15 | 5 IT-Overall   | 1 | 4 | 1.11379  | #####    |  |
| 30 | 1 IT | 2020-15 | 5 IT-Overall   | 1 | 5 | #####    | #####    |  |
| 31 | 1 IT | 2020-15 | 5 IT-Overall   | 2 | 1 | #####    | #####    |  |
| 32 | 1 IT | 2020-15 | 5 IT-Overall   | 2 | 2 | #####    | #####    |  |
| 33 | 1 IT | 2020-15 | 5 IT-Overall   | 2 | 3 | #####    | #####    |  |
| 34 | 1 IT | 2020-15 | 5 IT-Overall   | 2 | 4 | #####    | #####    |  |
| 35 | 1 IT | 2020-15 | 5 IT-Overall   | 2 | 5 | #####    | #####    |  |
| 36 | 1 IT | 2020-15 | 5 IT-Overall   | 3 | 1 | 1.116166 | #####    |  |
| 37 | 1 IT | 2020-15 | 5 IT-Overall   | 3 | 2 | 1.03548  | #####    |  |
| 38 | 1 IT | 2020-15 | 5 IT-Overall   | 3 | 3 | 1.013066 | #####    |  |
| 39 | 1 IT | 2020-15 | 5 IT-Overall   | 3 | 4 | 1.424579 | #####    |  |
| 40 | 1 IT | 2020-15 | 5 IT-Overall   | 3 | 5 | #####    | #####    |  |
| 41 | 1 IT | 2020-15 | 5 IT-South     | 1 | 1 | 1.342106 | #####    |  |
| 42 | 1 IT | 2020-15 | 5 IT-South     | 1 | 2 | #####    | #####    |  |
| 43 | 1 IT | 2020-15 | 5 IT-South     | 1 | 3 | 1.110924 | #####    |  |
| 44 | 1 IT | 2020-15 | 5 IT-South     | 1 | 4 | 1.858973 | #####    |  |
| 45 | 1 IT | 2020-15 | 5 IT-South     | 1 | 5 | 1.175191 | #####    |  |
| 46 | 1 IT | 2020-15 | 5 IT-South     | 2 | 1 | 1.006071 | #####    |  |
| 47 | 1 IT | 2020-15 | 5 IT-South     | 2 | 2 | #####    | #####    |  |
| 48 | 1 IT | 2020-15 | 5 IT-South     | 2 | 3 | 1.071429 | #####    |  |
| 49 | 1 IT | 2020-15 | 5 IT-South     | 2 | 4 | 1.222222 | #####    |  |
| 50 | 1 IT | 2020-15 | 5 IT-South     | 2 | 5 | #####    | #####    |  |
| 51 | 1 IT | 2020-15 | 5 IT-South     | 3 | 1 | 1.89237  | #####    |  |
| 52 | 1 IT | 2020-15 | 5 IT-South     | 3 | 2 | 1.125    | #####    |  |
| 53 | 1 IT | 2020-15 | 5 IT-South     | 3 | 3 | 1.333333 | #####    |  |
| 54 | 1 IT | 2020-15 | 5 IT-South     | 3 | 4 | 2.857143 | 1.434774 |  |
| 55 | 1 IT | 2020-15 | 5 IT-South     | 3 | 5 | 1.5      | #####    |  |
| 56 | 1 NL | 2020-14 | 1 NL-East Ne   | 1 | 1 | 5.82662  | #####    |  |
| 57 | 1 NL | 2020-14 | 1 NL-East Ne   | 1 | 2 | 7.308252 | 1.155537 |  |
| 58 | 1 NL | 2020-14 | 1 NL-East Ne   | 1 | 3 | 7.776557 | #####    |  |
| 59 | 1 NL | 2020-14 | 1 NL-East Ne   | 1 | 4 | 5.406079 | #####    |  |
| 60 | 1 NL | 2020-14 | 1 NL-East Ne   | 1 | 4 | 5.406079 | #####    |  |

1  
2  
3  
4  
5  
6  
7  
8  
9  
10  
11  
12  
13  
14  
15  
16  
17  
18  
19  
20  
21  
22  
23  
24  
25  
26  
27  
28  
29  
30  
31  
32  
33  
34  
35  
36  
37  
38  
39  
40  
41  
42  
43  
44  
45  
46  
47  
48  
49  
50  
51  
52  
53  
54  
55  
56  
57  
58  
59  
60

|      |         |              |   |   |          |          |
|------|---------|--------------|---|---|----------|----------|
| 1 NL | 2020-14 | 1 NL-East Ne | 1 | 5 | 1.947355 | #####    |
| 1 NL | 2020-14 | 1 NL-East Ne | 2 | 1 | 4.739883 | #####    |
| 1 NL | 2020-14 | 1 NL-East Ne | 2 | 2 | 5.755102 | #####    |
| 1 NL | 2020-14 | 1 NL-East Ne | 2 | 3 | 6.445652 | #####    |
| 1 NL | 2020-14 | 1 NL-East Ne | 2 | 4 | 4.745763 | #####    |
| 1 NL | 2020-14 | 1 NL-East Ne | 2 | 5 | 1.47541  | #####    |
| 1 NL | 2020-14 | 1 NL-East Ne | 3 | 1 | 7.032661 | #####    |
| 1 NL | 2020-14 | 1 NL-East Ne | 3 | 2 | 8.923077 | 2.141644 |
| 1 NL | 2020-14 | 1 NL-East Ne | 3 | 3 | 9.071429 | 1.101275 |
| 1 NL | 2020-14 | 1 NL-East Ne | 3 | 4 | 6.180328 | #####    |
| 1 NL | 2020-14 | 1 NL-East Ne | 3 | 5 | 2.578947 | #####    |
| 1 NL | 2020-14 | 1 NL-North N | 1 | 1 | 5.105459 | #####    |
| 1 NL | 2020-14 | 1 NL-North N | 1 | 2 | 6.84846  | #####    |
| 1 NL | 2020-14 | 1 NL-North N | 1 | 3 | 5.231411 | #####    |
| 1 NL | 2020-14 | 1 NL-North N | 1 | 4 | 5.669353 | #####    |
| 1 NL | 2020-14 | 1 NL-North N | 1 | 5 | 2.535892 | #####    |
| 1 NL | 2020-14 | 1 NL-North N | 2 | 1 | 5.393805 | #####    |
| 1 NL | 2020-14 | 1 NL-North N | 2 | 2 | 8.411765 | 1.302941 |
| 1 NL | 2020-14 | 1 NL-North N | 2 | 3 | 5.245902 | #####    |
| 1 NL | 2020-14 | 1 NL-North N | 2 | 4 | 5.854167 | #####    |
| 1 NL | 2020-14 | 1 NL-North N | 2 | 5 | 2.319149 | #####    |
| 1 NL | 2020-14 | 1 NL-North N | 3 | 1 | 4.803213 | #####    |
| 1 NL | 2020-14 | 1 NL-North N | 3 | 2 | 5.166667 | 1.279467 |
| 1 NL | 2020-14 | 1 NL-North N | 3 | 3 | 5.217391 | #####    |
| 1 NL | 2020-14 | 1 NL-North N | 3 | 4 | 5.482759 | #####    |
| 1 NL | 2020-14 | 1 NL-North N | 3 | 5 | 2.794118 | #####    |
| 1 NL | 2020-14 | 1 NL-Overall | 1 | 1 | 5.191749 | #####    |
| 1 NL | 2020-14 | 1 NL-Overall | 1 | 2 | 6.130074 | #####    |
| 1 NL | 2020-14 | 1 NL-Overall | 1 | 3 | 5.965673 | #####    |
| 1 NL | 2020-14 | 1 NL-Overall | 1 | 4 | 5.642667 | #####    |
| 1 NL | 2020-14 | 1 NL-Overall | 1 | 5 | 2.635329 | #####    |
| 1 NL | 2020-14 | 1 NL-Overall | 2 | 1 | 5.044397 | #####    |
| 1 NL | 2020-14 | 1 NL-Overall | 2 | 2 | 6.353575 | #####    |
| 1 NL | 2020-14 | 1 NL-Overall | 2 | 3 | 5.79263  | #####    |
| 1 NL | 2020-14 | 1 NL-Overall | 2 | 4 | 5.490354 | #####    |
| 1 NL | 2020-14 | 1 NL-Overall | 2 | 5 | 2.363972 | #####    |
| 1 NL | 2020-14 | 1 NL-Overall | 3 | 1 | 5.366739 | #####    |
| 1 NL | 2020-14 | 1 NL-Overall | 3 | 2 | 5.886066 | #####    |
| 1 NL | 2020-14 | 1 NL-Overall | 3 | 3 | 6.18089  | #####    |
| 1 NL | 2020-14 | 1 NL-Overall | 3 | 4 | 5.813328 | #####    |
| 1 NL | 2020-14 | 1 NL-Overall | 3 | 5 | 2.992708 | #####    |
| 1 NL | 2020-14 | 1 NL-South N | 1 | 1 | 5.298834 | #####    |
| 1 NL | 2020-14 | 1 NL-South N | 1 | 2 | 6.343409 | #####    |
| 1 NL | 2020-14 | 1 NL-South N | 1 | 3 | 6.128432 | #####    |
| 1 NL | 2020-14 | 1 NL-South N | 1 | 4 | 5.956289 | #####    |
| 1 NL | 2020-14 | 1 NL-South N | 1 | 5 | 2.926224 | #####    |
| 1 NL | 2020-14 | 1 NL-South N | 2 | 1 | 5.021882 | #####    |
| 1 NL | 2020-14 | 1 NL-South N | 2 | 2 | 7.045455 | 1.020067 |
| 1 NL | 2020-14 | 1 NL-South N | 2 | 3 | 5.511628 | #####    |
| 1 NL | 2020-14 | 1 NL-South N | 2 | 4 | 5.642857 | #####    |
| 1 NL | 2020-14 | 1 NL-South N | 2 | 5 | 2.512821 | #####    |
| 1 NL | 2020-14 | 1 NL-South N | 3 | 1 | 5.666222 | #####    |
| 1 NL | 2020-14 | 1 NL-South N | 3 | 2 | 5        | 1.3585   |
| 1 NL | 2020-14 | 1 NL-South N | 3 | 3 | 7        | 1.491205 |
| 1 NL | 2020-14 | 1 NL-South N | 3 | 4 | 6.34     | 1.048427 |
| 1 NL | 2020-14 | 1 NL-South N | 3 | 5 | 3.533333 | #####    |



|    |      |         |              |   |   |          |          |  |
|----|------|---------|--------------|---|---|----------|----------|--|
| 1  |      |         |              |   |   |          |          |  |
| 2  |      |         |              |   |   |          |          |  |
| 3  | 1 NL | 2020-14 | 1 NL-West N  | 1 | 1 | 4.824252 | #####    |  |
| 4  | 1 NL | 2020-14 | 1 NL-West N  | 1 | 2 | 5.290377 | #####    |  |
| 5  | 1 NL | 2020-14 | 1 NL-West N  | 1 | 3 | 4.969399 | #####    |  |
| 6  | 1 NL | 2020-14 | 1 NL-West N  | 1 | 4 | 5.624209 | #####    |  |
| 7  | 1 NL | 2020-14 | 1 NL-West N  | 1 | 5 | 2.837544 | #####    |  |
| 8  | 1 NL | 2020-14 | 1 NL-West N  | 2 | 1 | 5.129154 | #####    |  |
| 9  | 1 NL | 2020-14 | 1 NL-West N  | 2 | 2 | 5.793103 | #####    |  |
| 10 | 1 NL | 2020-14 | 1 NL-West N  | 2 | 3 | 5.695652 | #####    |  |
| 11 | 1 NL | 2020-14 | 1 NL-West N  | 2 | 4 | 5.732283 | #####    |  |
| 12 | 1 NL | 2020-14 | 1 NL-West N  | 2 | 5 | 2.746835 | #####    |  |
| 13 | 1 NL | 2020-14 | 1 NL-West N  | 3 | 1 | 4.456477 | #####    |  |
| 14 | 1 NL | 2020-14 | 1 NL-West N  | 3 | 2 | 4.75     | 1.099871 |  |
| 15 | 1 NL | 2020-14 | 1 NL-West N  | 3 | 3 | 3.916667 | #####    |  |
| 16 | 1 NL | 2020-14 | 1 NL-West N  | 3 | 4 | 5.507246 | #####    |  |
| 17 | 1 NL | 2020-14 | 1 NL-West N  | 3 | 5 | 2.951613 | #####    |  |
| 18 | 1 NL | 2020-14 | 2 NL-East Ne | 1 | 1 | 1.830384 | #####    |  |
| 19 | 1 NL | 2020-14 | 2 NL-East Ne | 1 | 2 | 2.471096 | #####    |  |
| 20 | 1 NL | 2020-14 | 2 NL-East Ne | 1 | 3 | 2.102067 | #####    |  |
| 21 | 1 NL | 2020-14 | 2 NL-East Ne | 1 | 4 | 1.67323  | #####    |  |
| 22 | 1 NL | 2020-14 | 2 NL-East Ne | 1 | 5 | 1.011207 | #####    |  |
| 23 | 1 NL | 2020-14 | 2 NL-East Ne | 2 | 1 | 1.810195 | #####    |  |
| 24 | 1 NL | 2020-14 | 2 NL-East Ne | 2 | 2 | 2.169811 | #####    |  |
| 25 | 1 NL | 2020-14 | 2 NL-East Ne | 2 | 3 | 2.276596 | #####    |  |
| 26 | 1 NL | 2020-14 | 2 NL-East Ne | 2 | 4 | 1.816667 | #####    |  |
| 27 | 1 NL | 2020-14 | 2 NL-East Ne | 2 | 5 | #####    | #####    |  |
| 28 | 1 NL | 2020-14 | 2 NL-East Ne | 3 | 1 | 1.852499 | #####    |  |
| 29 | 1 NL | 2020-14 | 2 NL-East Ne | 3 | 2 | 2.785714 | #####    |  |
| 30 | 1 NL | 2020-14 | 2 NL-East Ne | 3 | 3 | 1.928571 | #####    |  |
| 31 | 1 NL | 2020-14 | 2 NL-East Ne | 3 | 4 | 1.515152 | #####    |  |
| 32 | 1 NL | 2020-14 | 2 NL-East Ne | 3 | 5 | 1.289474 | #####    |  |
| 33 | 1 NL | 2020-14 | 2 NL-North N | 1 | 1 | 1.774702 | #####    |  |
| 34 | 1 NL | 2020-14 | 2 NL-North N | 1 | 2 | 2.58098  | #####    |  |
| 35 | 1 NL | 2020-14 | 2 NL-North N | 1 | 3 | 1.707542 | #####    |  |
| 36 | 1 NL | 2020-14 | 2 NL-North N | 1 | 4 | 1.708083 | #####    |  |
| 37 | 1 NL | 2020-14 | 2 NL-North N | 1 | 5 | 1.159204 | #####    |  |
| 38 | 1 NL | 2020-14 | 2 NL-North N | 2 | 1 | 1.78375  | #####    |  |
| 39 | 1 NL | 2020-14 | 2 NL-North N | 2 | 2 | 2.444444 | #####    |  |
| 40 | 1 NL | 2020-14 | 2 NL-North N | 2 | 3 | 1.940299 | #####    |  |
| 41 | 1 NL | 2020-14 | 2 NL-North N | 2 | 4 | 1.77     | #####    |  |
| 42 | 1 NL | 2020-14 | 2 NL-North N | 2 | 5 | 1.021277 | #####    |  |
| 43 | 1 NL | 2020-14 | 2 NL-North N | 3 | 1 | 1.765324 | #####    |  |
| 44 | 1 NL | 2020-14 | 2 NL-North N | 3 | 2 | 2.714286 | #####    |  |
| 45 | 1 NL | 2020-14 | 2 NL-North N | 3 | 3 | 1.48     | #####    |  |
| 46 | 1 NL | 2020-14 | 2 NL-North N | 3 | 4 | 1.644068 | #####    |  |
| 47 | 1 NL | 2020-14 | 2 NL-North N | 3 | 5 | 1.323529 | #####    |  |
| 48 | 1 NL | 2020-14 | 2 NL-Overall | 1 | 1 | 1.908353 | #####    |  |
| 49 | 1 NL | 2020-14 | 2 NL-Overall | 1 | 2 | 2.798748 | #####    |  |
| 50 | 1 NL | 2020-14 | 2 NL-Overall | 1 | 3 | 1.986376 | #####    |  |
| 51 | 1 NL | 2020-14 | 2 NL-Overall | 1 | 4 | 1.705488 | #####    |  |
| 52 | 1 NL | 2020-14 | 2 NL-Overall | 1 | 5 | 1.271707 | #####    |  |
| 53 | 1 NL | 2020-14 | 2 NL-Overall | 2 | 1 | 1.902684 | #####    |  |
| 54 | 1 NL | 2020-14 | 2 NL-Overall | 2 | 2 | 2.655739 | #####    |  |
| 55 | 1 NL | 2020-14 | 2 NL-Overall | 2 | 3 | 2.126176 | #####    |  |
| 56 | 1 NL | 2020-14 | 2 NL-Overall | 2 | 4 | 1.756848 | #####    |  |
| 57 | 1 NL | 2020-14 | 2 NL-Overall | 2 | 5 | 1.171031 | #####    |  |
| 58 | 1 NL | 2020-14 | 2 NL-Overall | 3 | 1 | 1.914968 | #####    |  |
| 59 | 1 NL | 2020-14 | 2 NL-Overall | 3 |   |          |          |  |
| 60 | 1 NL | 2020-14 | 2 NL-Overall | 3 |   |          |          |  |

1  
2  
3  
4  
5  
6  
7  
8  
9  
10  
11  
12  
13  
14  
15  
16  
17  
18  
19  
20  
21  
22  
23  
24  
25  
26  
27  
28  
29  
30  
31  
32  
33  
34  
35  
36  
37  
38  
39  
40  
41  
42  
43  
44  
45  
46  
47  
48  
49  
50  
51  
52  
53  
54  
55  
56  
57  
58  
59  
60

|      |         |              |   |   |          |       |
|------|---------|--------------|---|---|----------|-------|
| 1 NL | 2020-14 | 2 NL-Overall | 3 | 2 | 2.948751 | ##### |
| 1 NL | 2020-14 | 2 NL-Overall | 3 | 3 | 1.817925 | ##### |
| 1 NL | 2020-14 | 2 NL-Overall | 3 | 4 | 1.647871 | ##### |
| 1 NL | 2020-14 | 2 NL-Overall | 3 | 5 | 1.404298 | ##### |
| 1 NL | 2020-14 | 2 NL-South N | 1 | 1 | 1.973142 | ##### |
| 1 NL | 2020-14 | 2 NL-South N | 1 | 2 | 2.952954 | ##### |
| 1 NL | 2020-14 | 2 NL-South N | 1 | 3 | 2.046303 | ##### |
| 1 NL | 2020-14 | 2 NL-South N | 1 | 4 | 1.689963 | ##### |
| 1 NL | 2020-14 | 2 NL-South N | 1 | 5 | 1.485745 | ##### |
| 1 NL | 2020-14 | 2 NL-South N | 2 | 1 | 1.918314 | ##### |
| 1 NL | 2020-14 | 2 NL-South N | 2 | 2 | 2.666667 | ##### |
| 1 NL | 2020-14 | 2 NL-South N | 2 | 3 | 2.168539 | ##### |
| 1 NL | 2020-14 | 2 NL-South N | 2 | 4 | 1.677686 | ##### |
| 1 NL | 2020-14 | 2 NL-South N | 2 | 5 | 1.423077 | ##### |
| 1 NL | 2020-14 | 2 NL-South N | 3 | 1 | 2.045841 | ##### |
| 1 NL | 2020-14 | 2 NL-South N | 3 | 2 | 3.272727 | ##### |
| 1 NL | 2020-14 | 2 NL-South N | 3 | 3 | 1.875    | ##### |
| 1 NL | 2020-14 | 2 NL-South N | 3 | 4 | 1.705882 | ##### |
| 1 NL | 2020-14 | 2 NL-South N | 3 | 5 | 1.577778 | ##### |
| 1 NL | 2020-14 | 2 NL-West N  | 1 | 1 | 1.953154 | ##### |
| 1 NL | 2020-14 | 2 NL-West N  | 1 | 2 | 2.950734 | ##### |
| 1 NL | 2020-14 | 2 NL-West N  | 1 | 3 | 1.960523 | ##### |
| 1 NL | 2020-14 | 2 NL-West N  | 1 | 4 | 1.728263 | ##### |
| 1 NL | 2020-14 | 2 NL-West N  | 1 | 5 | 1.305441 | ##### |
| 1 NL | 2020-14 | 2 NL-West N  | 2 | 1 | 1.970998 | ##### |
| 1 NL | 2020-14 | 2 NL-West N  | 2 | 2 | 2.949153 | ##### |
| 1 NL | 2020-14 | 2 NL-West N  | 2 | 3 | 2.070423 | ##### |
| 1 NL | 2020-14 | 2 NL-West N  | 2 | 4 | 1.759398 | ##### |
| 1 NL | 2020-14 | 2 NL-West N  | 2 | 5 | 1.240506 | ##### |
| 1 NL | 2020-14 | 2 NL-West N  | 3 | 1 | 1.932244 | ##### |
| 1 NL | 2020-14 | 2 NL-West N  | 3 | 2 | 2.952381 | ##### |
| 1 NL | 2020-14 | 2 NL-West N  | 3 | 3 | 1.814815 | ##### |
| 1 NL | 2020-14 | 2 NL-West N  | 3 | 4 | 1.694444 | ##### |
| 1 NL | 2020-14 | 2 NL-West N  | 3 | 5 | 1.387097 | ##### |
| 1 NL | 2020-14 | 3 NL-East Ne | 1 | 1 | #####    | ##### |
| 1 NL | 2020-14 | 3 NL-East Ne | 1 | 2 | 0        | 0     |
| 1 NL | 2020-14 | 3 NL-East Ne | 1 | 3 | #####    | ##### |
| 1 NL | 2020-14 | 3 NL-East Ne | 1 | 4 | #####    | ##### |
| 1 NL | 2020-14 | 3 NL-East Ne | 1 | 5 | #####    | ##### |
| 1 NL | 2020-14 | 3 NL-East Ne | 2 | 1 | #####    | ##### |
| 1 NL | 2020-14 | 3 NL-East Ne | 2 | 2 | 0        | 0     |
| 1 NL | 2020-14 | 3 NL-East Ne | 2 | 3 | #####    | ##### |
| 1 NL | 2020-14 | 3 NL-East Ne | 2 | 4 | 0.025    | ##### |
| 1 NL | 2020-14 | 3 NL-East Ne | 2 | 5 | #####    | ##### |
| 1 NL | 2020-14 | 3 NL-East Ne | 3 | 1 | #####    | ##### |
| 1 NL | 2020-14 | 3 NL-East Ne | 3 | 2 | 0        | 0     |
| 1 NL | 2020-14 | 3 NL-East Ne | 3 | 3 | 0        | 0     |
| 1 NL | 2020-14 | 3 NL-East Ne | 3 | 4 | #####    | ##### |
| 1 NL | 2020-14 | 3 NL-East Ne | 3 | 5 | 0        | 0     |
| 1 NL | 2020-14 | 3 NL-North N | 1 | 1 | #####    | ##### |
| 1 NL | 2020-14 | 3 NL-North N | 1 | 2 | #####    | ##### |
| 1 NL | 2020-14 | 3 NL-North N | 1 | 3 | #####    | ##### |
| 1 NL | 2020-14 | 3 NL-North N | 1 | 4 | #####    | ##### |
| 1 NL | 2020-14 | 3 NL-North N | 1 | 5 | #####    | ##### |
| 1 NL | 2020-14 | 3 NL-North N | 2 | 1 | #####    | ##### |
| 1 NL | 2020-14 | 3 NL-North N | 2 | 2 | #####    | ##### |

|    |      |         |              |   |   |          |        |  |
|----|------|---------|--------------|---|---|----------|--------|--|
| 1  |      |         |              |   |   |          |        |  |
| 2  |      |         |              |   |   |          |        |  |
| 3  | 1 NL | 2020-14 | 3 NL-North N | 2 | 3 | #####    | #####  |  |
| 4  | 1 NL | 2020-14 | 3 NL-North N | 2 | 4 | 0.03     | #####  |  |
| 5  | 1 NL | 2020-14 | 3 NL-North N | 2 | 5 | #####    | #####  |  |
| 6  | 1 NL | 2020-14 | 3 NL-North N | 3 | 1 | #####    | #####  |  |
| 7  | 1 NL | 2020-14 | 3 NL-North N | 3 | 2 | 0        | 0      |  |
| 8  | 1 NL | 2020-14 | 3 NL-North N | 3 | 3 | 0        | 0      |  |
| 9  | 1 NL | 2020-14 | 3 NL-North N | 3 | 4 | #####    | #####  |  |
| 10 | 1 NL | 2020-14 | 3 NL-North N | 3 | 5 | #####    | #####  |  |
| 11 | 1 NL | 2020-14 | 3 NL-Overall | 1 | 1 | #####    | #####  |  |
| 12 | 1 NL | 2020-14 | 3 NL-Overall | 1 | 2 | #####    | #####  |  |
| 13 | 1 NL | 2020-14 | 3 NL-Overall | 1 | 3 | #####    | #####  |  |
| 14 | 1 NL | 2020-14 | 3 NL-Overall | 1 | 4 | #####    | #####  |  |
| 15 | 1 NL | 2020-14 | 3 NL-Overall | 1 | 5 | #####    | #####  |  |
| 16 | 1 NL | 2020-14 | 3 NL-Overall | 2 | 1 | #####    | #####  |  |
| 17 | 1 NL | 2020-14 | 3 NL-Overall | 2 | 2 | #####    | #####  |  |
| 18 | 1 NL | 2020-14 | 3 NL-Overall | 2 | 3 | #####    | #####  |  |
| 19 | 1 NL | 2020-14 | 3 NL-Overall | 2 | 4 | #####    | #####  |  |
| 20 | 1 NL | 2020-14 | 3 NL-Overall | 2 | 5 | #####    | #####  |  |
| 21 | 1 NL | 2020-14 | 3 NL-Overall | 3 | 1 | #####    | #####  |  |
| 22 | 1 NL | 2020-14 | 3 NL-Overall | 3 | 2 | 0        | 0      |  |
| 23 | 1 NL | 2020-14 | 3 NL-Overall | 3 | 3 | 0        | 0      |  |
| 24 | 1 NL | 2020-14 | 3 NL-Overall | 3 | 4 | #####    | #####  |  |
| 25 | 1 NL | 2020-14 | 3 NL-Overall | 3 | 5 | #####    | #####  |  |
| 26 | 1 NL | 2020-14 | 3 NL-Overall | 3 | 5 | #####    | #####  |  |
| 27 | 1 NL | 2020-14 | 3 NL-South N | 1 | 1 | #####    | #####  |  |
| 28 | 1 NL | 2020-14 | 3 NL-South N | 1 | 2 | 0        | 0      |  |
| 29 | 1 NL | 2020-14 | 3 NL-South N | 1 | 3 | #####    | #####  |  |
| 30 | 1 NL | 2020-14 | 3 NL-South N | 1 | 4 | #####    | #####  |  |
| 31 | 1 NL | 2020-14 | 3 NL-South N | 1 | 5 | #####    | #####  |  |
| 32 | 1 NL | 2020-14 | 3 NL-South N | 2 | 1 | #####    | #####  |  |
| 33 | 1 NL | 2020-14 | 3 NL-South N | 2 | 2 | 0        | 0      |  |
| 34 | 1 NL | 2020-14 | 3 NL-South N | 2 | 3 | #####    | #####  |  |
| 35 | 1 NL | 2020-14 | 3 NL-South N | 2 | 4 | #####    | #####  |  |
| 36 | 1 NL | 2020-14 | 3 NL-South N | 2 | 5 | #####    | #####  |  |
| 37 | 1 NL | 2020-14 | 3 NL-South N | 3 | 1 | #####    | #####  |  |
| 38 | 1 NL | 2020-14 | 3 NL-South N | 3 | 2 | 0        | 0      |  |
| 39 | 1 NL | 2020-14 | 3 NL-South N | 3 | 3 | 0        | 0      |  |
| 40 | 1 NL | 2020-14 | 3 NL-South N | 3 | 4 | 0        | 0      |  |
| 41 | 1 NL | 2020-14 | 3 NL-South N | 3 | 5 | #####    | #####  |  |
| 42 | 1 NL | 2020-14 | 3 NL-West N  | 1 | 1 | #####    | #####  |  |
| 43 | 1 NL | 2020-14 | 3 NL-West N  | 1 | 2 | #####    | #####  |  |
| 44 | 1 NL | 2020-14 | 3 NL-West N  | 1 | 3 | 0        | 0      |  |
| 45 | 1 NL | 2020-14 | 3 NL-West N  | 1 | 4 | #####    | #####  |  |
| 46 | 1 NL | 2020-14 | 3 NL-West N  | 1 | 5 | #####    | #####  |  |
| 47 | 1 NL | 2020-14 | 3 NL-West N  | 2 | 1 | #####    | #####  |  |
| 48 | 1 NL | 2020-14 | 3 NL-West N  | 2 | 2 | #####    | #####  |  |
| 49 | 1 NL | 2020-14 | 3 NL-West N  | 2 | 3 | 0        | 0      |  |
| 50 | 1 NL | 2020-14 | 3 NL-West N  | 2 | 4 | #####    | #####  |  |
| 51 | 1 NL | 2020-14 | 3 NL-West N  | 2 | 5 | #####    | #####  |  |
| 52 | 1 NL | 2020-14 | 3 NL-West N  | 3 | 1 | 0        | 0      |  |
| 53 | 1 NL | 2020-14 | 3 NL-West N  | 3 | 2 | 0        | 0      |  |
| 54 | 1 NL | 2020-14 | 3 NL-West N  | 3 | 3 | 0        | 0      |  |
| 55 | 1 NL | 2020-14 | 3 NL-West N  | 3 | 4 | 0        | 0      |  |
| 56 | 1 NL | 2020-14 | 3 NL-West N  | 3 | 5 | 0        | 0      |  |
| 57 | 1 NL | 2020-14 | 3 NL-West N  | 3 | 5 | 0        | 0      |  |
| 58 | 1 NL | 2020-14 | 4 NL-East Ne | 1 | 1 | 2.585914 | #####  |  |
| 59 | 1 NL | 2020-14 | 4 NL-East Ne | 1 | 2 | 4.000066 | 1.0271 |  |
| 60 | 1 NL | 2020-14 | 4 NL-East Ne | 1 | 3 | 3.568611 | #####  |  |

|    |      |         |              |   |   |          |          |  |
|----|------|---------|--------------|---|---|----------|----------|--|
| 1  |      |         |              |   |   |          |          |  |
| 2  |      |         |              |   |   |          |          |  |
| 3  | 1 NL | 2020-14 | 4 NL-East Ne | 1 | 4 | 2.239865 | #####    |  |
| 4  | 1 NL | 2020-14 | 4 NL-East Ne | 1 | 5 | #####    | #####    |  |
| 5  | 1 NL | 2020-14 | 4 NL-East Ne | 2 | 1 | 1.779294 | #####    |  |
| 6  | 1 NL | 2020-14 | 4 NL-East Ne | 2 | 2 | 2.22449  | #####    |  |
| 7  | 1 NL | 2020-14 | 4 NL-East Ne | 2 | 3 | 2.782609 | #####    |  |
| 8  | 1 NL | 2020-14 | 4 NL-East Ne | 2 | 4 | 1.762712 | #####    |  |
| 9  | 1 NL | 2020-14 | 4 NL-East Ne | 2 | 5 | #####    | #####    |  |
| 10 | 1 NL | 2020-14 | 4 NL-East Ne | 3 | 1 | 3.464248 | #####    |  |
| 11 | 1 NL | 2020-14 | 4 NL-East Ne | 3 | 2 | 5.714286 | 1.830918 |  |
| 12 | 1 NL | 2020-14 | 4 NL-East Ne | 3 | 3 | 4.333333 | #####    |  |
| 13 | 1 NL | 2020-14 | 4 NL-East Ne | 3 | 4 | 2.790323 | #####    |  |
| 14 | 1 NL | 2020-14 | 4 NL-East Ne | 3 | 5 | #####    | #####    |  |
| 15 | 1 NL | 2020-14 | 4 NL-North N | 1 | 1 | 2.140318 | #####    |  |
| 16 | 1 NL | 2020-14 | 4 NL-North N | 1 | 2 | 2.973366 | #####    |  |
| 17 | 1 NL | 2020-14 | 4 NL-North N | 1 | 3 | 2.312315 | #####    |  |
| 18 | 1 NL | 2020-14 | 4 NL-North N | 1 | 4 | 2.744854 | #####    |  |
| 19 | 1 NL | 2020-14 | 4 NL-North N | 1 | 5 | #####    | #####    |  |
| 20 | 1 NL | 2020-14 | 4 NL-North N | 2 | 1 | 2.142102 | #####    |  |
| 21 | 1 NL | 2020-14 | 4 NL-North N | 2 | 2 | 3.326923 | #####    |  |
| 22 | 1 NL | 2020-14 | 4 NL-North N | 2 | 3 | 2.507937 | #####    |  |
| 23 | 1 NL | 2020-14 | 4 NL-North N | 2 | 4 | 2.645833 | #####    |  |
| 24 | 1 NL | 2020-14 | 4 NL-North N | 2 | 5 | 0        | 0        |  |
| 25 | 1 NL | 2020-14 | 4 NL-North N | 3 | 1 | 2.138476 | #####    |  |
| 26 | 1 NL | 2020-14 | 4 NL-North N | 3 | 2 | 2.615385 | 1.453781 |  |
| 27 | 1 NL | 2020-14 | 4 NL-North N | 3 | 3 | 2.125    | #####    |  |
| 28 | 1 NL | 2020-14 | 4 NL-North N | 3 | 4 | 2.844828 | #####    |  |
| 29 | 1 NL | 2020-14 | 4 NL-North N | 3 | 5 | 0.5      | #####    |  |
| 30 | 1 NL | 2020-14 | 4 NL-Overall | 1 | 1 | 1.931176 | #####    |  |
| 31 | 1 NL | 2020-14 | 4 NL-Overall | 1 | 2 | 2.2304   | #####    |  |
| 32 | 1 NL | 2020-14 | 4 NL-Overall | 1 | 3 | 2.442382 | #####    |  |
| 33 | 1 NL | 2020-14 | 4 NL-Overall | 1 | 4 | 2.427549 | #####    |  |
| 34 | 1 NL | 2020-14 | 4 NL-Overall | 1 | 5 | #####    | #####    |  |
| 35 | 1 NL | 2020-14 | 4 NL-Overall | 2 | 1 | 1.660449 | #####    |  |
| 36 | 1 NL | 2020-14 | 4 NL-Overall | 2 | 2 | 2.067168 | #####    |  |
| 37 | 1 NL | 2020-14 | 4 NL-Overall | 2 | 3 | 2.225506 | #####    |  |
| 38 | 1 NL | 2020-14 | 4 NL-Overall | 2 | 4 | 2.039074 | #####    |  |
| 39 | 1 NL | 2020-14 | 4 NL-Overall | 2 | 5 | #####    | #####    |  |
| 40 | 1 NL | 2020-14 | 4 NL-Overall | 3 | 1 | 2.24882  | #####    |  |
| 41 | 1 NL | 2020-14 | 4 NL-Overall | 3 | 2 | 2.40431  | #####    |  |
| 42 | 1 NL | 2020-14 | 4 NL-Overall | 3 | 3 | 2.711554 | 0.443343 |  |
| 43 | 1 NL | 2020-14 | 4 NL-Overall | 3 | 4 | 2.859088 | #####    |  |
| 44 | 1 NL | 2020-14 | 4 NL-Overall | 3 | 5 | #####    | #####    |  |
| 45 | 1 NL | 2020-14 | 4 NL-South N | 1 | 1 | 1.944039 | #####    |  |
| 46 | 1 NL | 2020-14 | 4 NL-South N | 1 | 2 | 2.252402 | #####    |  |
| 47 | 1 NL | 2020-14 | 4 NL-South N | 1 | 3 | 2.755921 | #####    |  |
| 48 | 1 NL | 2020-14 | 4 NL-South N | 1 | 4 | 2.488184 | #####    |  |
| 49 | 1 NL | 2020-14 | 4 NL-South N | 1 | 5 | #####    | #####    |  |
| 50 | 1 NL | 2020-14 | 4 NL-South N | 2 | 1 | 1.589225 | #####    |  |
| 51 | 1 NL | 2020-14 | 4 NL-South N | 2 | 2 | 2.795455 | #####    |  |
| 52 | 1 NL | 2020-14 | 4 NL-South N | 2 | 3 | 1.813953 | #####    |  |
| 53 | 1 NL | 2020-14 | 4 NL-South N | 2 | 4 | 2.106195 | #####    |  |
| 54 | 1 NL | 2020-14 | 4 NL-South N | 2 | 5 | 0        | 0        |  |
| 55 | 1 NL | 2020-14 | 4 NL-South N | 3 | 1 | 2.4134   | #####    |  |
| 56 | 1 NL | 2020-14 | 4 NL-South N | 3 | 2 | 1.6      | #####    |  |
| 57 | 1 NL | 2020-14 | 4 NL-South N | 3 | 3 | 4.086957 | 1.206507 |  |
| 58 | 1 NL | 2020-14 | 4 NL-South N | 3 | 4 | 2.96     | #####    |  |
| 59 | 1 NL | 2020-14 | 4 NL-South N | 3 |   |          |          |  |
| 60 | 1 NL | 2020-14 | 4 NL-South N | 3 |   |          |          |  |

|    |      |         |              |   |   |          |       |
|----|------|---------|--------------|---|---|----------|-------|
| 1  |      |         |              |   |   |          |       |
| 2  |      |         |              |   |   |          |       |
| 3  | 1 NL | 2020-14 | 4 NL-South N | 3 | 5 | #####    | ##### |
| 4  | 1 NL | 2020-14 | 4 NL-West N  | 1 | 1 | 1.521128 | ##### |
| 5  | 1 NL | 2020-14 | 4 NL-West N  | 1 | 2 | 1.145608 | ##### |
| 6  | 1 NL | 2020-14 | 4 NL-West N  | 1 | 3 | 1.651651 | ##### |
| 7  | 1 NL | 2020-14 | 4 NL-West N  | 1 | 4 | 2.418786 | ##### |
| 8  | 1 NL | 2020-14 | 4 NL-West N  | 1 | 5 | #####    | ##### |
| 9  | 1 NL | 2020-14 | 4 NL-West N  | 2 | 1 | 1.519693 | ##### |
| 10 | 1 NL | 2020-14 | 4 NL-West N  | 2 | 2 | 1.327586 | ##### |
| 11 | 1 NL | 2020-14 | 4 NL-West N  | 2 | 3 | 2.072464 | ##### |
| 12 | 1 NL | 2020-14 | 4 NL-West N  | 2 | 4 | 2.007874 | ##### |
| 13 | 1 NL | 2020-14 | 4 NL-West N  | 2 | 5 | #####    | ##### |
| 14 | 1 NL | 2020-14 | 4 NL-West N  | 3 | 1 | 1.52284  | ##### |
| 15 | 1 NL | 2020-14 | 4 NL-West N  | 3 | 2 | 0.95     | ##### |
| 16 | 1 NL | 2020-14 | 4 NL-West N  | 3 | 3 | 1.041667 | ##### |
| 17 | 1 NL | 2020-14 | 4 NL-West N  | 3 | 4 | 2.857143 | ##### |
| 18 | 1 NL | 2020-14 | 4 NL-West N  | 3 | 5 | 0.375    | ##### |
| 19 | 1 NL | 2020-14 | 5 NL-East Ne | 1 | 1 | 1.512155 | ##### |
| 20 | 1 NL | 2020-14 | 5 NL-East Ne | 1 | 2 | 1.602197 | ##### |
| 21 | 1 NL | 2020-14 | 5 NL-East Ne | 1 | 3 | 2.055943 | ##### |
| 22 | 1 NL | 2020-14 | 5 NL-East Ne | 1 | 4 | 1.407716 | ##### |
| 23 | 1 NL | 2020-14 | 5 NL-East Ne | 1 | 5 | #####    | ##### |
| 24 | 1 NL | 2020-14 | 5 NL-East Ne | 2 | 1 | 1.125453 | ##### |
| 25 | 1 NL | 2020-14 | 5 NL-East Ne | 2 | 2 | 1.423077 | ##### |
| 26 | 1 NL | 2020-14 | 5 NL-East Ne | 2 | 3 | 1.297872 | ##### |
| 27 | 1 NL | 2020-14 | 5 NL-East Ne | 2 | 4 | 1.151261 | ##### |
| 28 | 1 NL | 2020-14 | 5 NL-East Ne | 2 | 5 | #####    | ##### |
| 29 | 1 NL | 2020-14 | 5 NL-East Ne | 3 | 1 | 1.935212 | ##### |
| 30 | 1 NL | 2020-14 | 5 NL-East Ne | 3 | 2 | 1.785714 | ##### |
| 31 | 1 NL | 2020-14 | 5 NL-East Ne | 3 | 3 | 2.809524 | ##### |
| 32 | 1 NL | 2020-14 | 5 NL-East Ne | 3 | 4 | 1.692308 | ##### |
| 33 | 1 NL | 2020-14 | 5 NL-East Ne | 3 | 5 | #####    | ##### |
| 34 | 1 NL | 2020-14 | 5 NL-North N | 1 | 1 | 1.330967 | ##### |
| 35 | 1 NL | 2020-14 | 5 NL-North N | 1 | 2 | 1.471435 | ##### |
| 36 | 1 NL | 2020-14 | 5 NL-North N | 1 | 3 | 1.516087 | ##### |
| 37 | 1 NL | 2020-14 | 5 NL-North N | 1 | 4 | 1.230997 | ##### |
| 38 | 1 NL | 2020-14 | 5 NL-North N | 1 | 5 | 1.123534 | ##### |
| 39 | 1 NL | 2020-14 | 5 NL-North N | 2 | 1 | 1.428112 | ##### |
| 40 | 1 NL | 2020-14 | 5 NL-North N | 2 | 2 | 2.226415 | ##### |
| 41 | 1 NL | 2020-14 | 5 NL-North N | 2 | 3 | #####    | ##### |
| 42 | 1 NL | 2020-14 | 5 NL-North N | 2 | 4 | 1.52     | ##### |
| 43 | 1 NL | 2020-14 | 5 NL-North N | 2 | 5 | 1.276596 | ##### |
| 44 | 1 NL | 2020-14 | 5 NL-North N | 3 | 1 | 1.228754 | ##### |
| 45 | 1 NL | 2020-14 | 5 NL-North N | 3 | 2 | #####    | ##### |
| 46 | 1 NL | 2020-14 | 5 NL-North N | 3 | 3 | 2.208333 | ##### |
| 47 | 1 NL | 2020-14 | 5 NL-North N | 3 | 4 | #####    | ##### |
| 48 | 1 NL | 2020-14 | 5 NL-North N | 3 | 5 | #####    | ##### |
| 49 | 1 NL | 2020-14 | 5 NL-Overall | 1 | 1 | 1.508983 | ##### |
| 50 | 1 NL | 2020-14 | 5 NL-Overall | 1 | 2 | 1.253842 | ##### |
| 51 | 1 NL | 2020-14 | 5 NL-Overall | 1 | 3 | 1.761294 | ##### |
| 52 | 1 NL | 2020-14 | 5 NL-Overall | 1 | 4 | 1.657329 | ##### |
| 53 | 1 NL | 2020-14 | 5 NL-Overall | 1 | 5 | 1.171807 | ##### |
| 54 | 1 NL | 2020-14 | 5 NL-Overall | 2 | 1 | 1.53654  | ##### |
| 55 | 1 NL | 2020-14 | 5 NL-Overall | 2 | 2 | 1.473789 | ##### |
| 56 | 1 NL | 2020-14 | 5 NL-Overall | 2 | 3 | 1.533423 | ##### |
| 57 | 1 NL | 2020-14 | 5 NL-Overall | 2 | 4 | 1.876893 | ##### |
| 58 | 1 NL | 2020-14 | 5 NL-Overall | 2 | 5 | 1.097224 | ##### |
| 59 | 1 NL | 2020-14 | 5 NL-Overall | 2 |   |          |       |
| 60 | 1 NL | 2020-14 | 5 NL-Overall | 2 |   |          |       |

|    |      |         |              |   |   |          |          |  |
|----|------|---------|--------------|---|---|----------|----------|--|
| 1  |      |         |              |   |   |          |          |  |
| 2  |      |         |              |   |   |          |          |  |
| 3  | 1 NL | 2020-14 | 5 NL-Overall | 3 | 1 | 1.476705 | #####    |  |
| 4  | 1 NL | 2020-14 | 5 NL-Overall | 3 | 2 | 1.02254  | #####    |  |
| 5  | 1 NL | 2020-14 | 5 NL-Overall | 3 | 3 | 2.041419 | #####    |  |
| 6  | 1 NL | 2020-14 | 5 NL-Overall | 3 | 4 | 1.410269 | #####    |  |
| 7  | 1 NL | 2020-14 | 5 NL-Overall | 3 | 5 | 1.268192 | #####    |  |
| 8  | 1 NL | 2020-14 | 5 NL-South N | 1 | 1 | 1.482954 | #####    |  |
| 9  | 1 NL | 2020-14 | 5 NL-South N | 1 | 2 | 1.140846 | #####    |  |
| 10 | 1 NL | 2020-14 | 5 NL-South N | 1 | 3 | 1.267087 | #####    |  |
| 11 | 1 NL | 2020-14 | 5 NL-South N | 1 | 4 | 2.098749 | #####    |  |
| 12 | 1 NL | 2020-14 | 5 NL-South N | 1 | 5 | 1.235436 | #####    |  |
| 13 | 1 NL | 2020-14 | 5 NL-South N | 2 | 1 | 1.654042 | #####    |  |
| 14 | 1 NL | 2020-14 | 5 NL-South N | 2 | 2 | 1.511111 | #####    |  |
| 15 | 1 NL | 2020-14 | 5 NL-South N | 2 | 3 | 1.455556 | #####    |  |
| 16 | 1 NL | 2020-14 | 5 NL-South N | 2 | 4 | 2.45     | #####    |  |
| 17 | 1 NL | 2020-14 | 5 NL-South N | 2 | 5 | 1.051282 | #####    |  |
| 18 | 1 NL | 2020-14 | 5 NL-South N | 3 | 1 | 1.257138 | #####    |  |
| 19 | 1 NL | 2020-14 | 5 NL-South N | 3 | 2 | #####    | #####    |  |
| 20 | 1 NL | 2020-14 | 5 NL-South N | 3 | 3 | 1        | #####    |  |
| 21 | 1 NL | 2020-14 | 5 NL-South N | 3 | 4 | 1.647059 | #####    |  |
| 22 | 1 NL | 2020-14 | 5 NL-South N | 3 | 5 | 1.5      | #####    |  |
| 23 | 1 NL | 2020-14 | 5 NL-South N | 3 | 5 | 1.564693 | #####    |  |
| 24 | 1 NL | 2020-14 | 5 NL-West N  | 1 | 1 | 1.077005 | #####    |  |
| 25 | 1 NL | 2020-14 | 5 NL-West N  | 1 | 2 | 1.869731 | #####    |  |
| 26 | 1 NL | 2020-14 | 5 NL-West N  | 1 | 3 | 1.703125 | #####    |  |
| 27 | 1 NL | 2020-14 | 5 NL-West N  | 1 | 4 | 1.703125 | #####    |  |
| 28 | 1 NL | 2020-14 | 5 NL-West N  | 1 | 5 | 1.384835 | #####    |  |
| 29 | 1 NL | 2020-14 | 5 NL-West N  | 2 | 1 | 1.713462 | #####    |  |
| 30 | 1 NL | 2020-14 | 5 NL-West N  | 2 | 2 | 1.288136 | #####    |  |
| 31 | 1 NL | 2020-14 | 5 NL-West N  | 2 | 3 | 1.830986 | #####    |  |
| 32 | 1 NL | 2020-14 | 5 NL-West N  | 2 | 4 | 2.075758 | #####    |  |
| 33 | 1 NL | 2020-14 | 5 NL-West N  | 2 | 5 | 1.35443  | #####    |  |
| 34 | 1 NL | 2020-14 | 5 NL-West N  | 3 | 1 | 1.389257 | #####    |  |
| 35 | 1 NL | 2020-14 | 5 NL-West N  | 3 | 2 | #####    | #####    |  |
| 36 | 1 NL | 2020-14 | 5 NL-West N  | 3 | 3 | 1.923077 | 1.040634 |  |
| 37 | 1 NL | 2020-14 | 5 NL-West N  | 3 | 4 | 1.295775 | #####    |  |
| 38 | 1 NL | 2020-14 | 5 NL-West N  | 3 | 5 | 1.421875 | #####    |  |
| 39 | 1 NL | 2020-15 | 1 NL-East Ne | 1 | 1 | 5.914003 | #####    |  |
| 40 | 1 NL | 2020-15 | 1 NL-East Ne | 1 | 2 | 6.792539 | #####    |  |
| 41 | 1 NL | 2020-15 | 1 NL-East Ne | 1 | 3 | 6.151692 | #####    |  |
| 42 | 1 NL | 2020-15 | 1 NL-East Ne | 1 | 4 | 6.690278 | #####    |  |
| 43 | 1 NL | 2020-15 | 1 NL-East Ne | 1 | 5 | 3.150139 | #####    |  |
| 44 | 1 NL | 2020-15 | 1 NL-East Ne | 2 | 1 | 5.754338 | #####    |  |
| 45 | 1 NL | 2020-15 | 1 NL-East Ne | 2 | 2 | 5.666667 | #####    |  |
| 46 | 1 NL | 2020-15 | 1 NL-East Ne | 2 | 3 | 6.608696 | #####    |  |
| 47 | 1 NL | 2020-15 | 1 NL-East Ne | 2 | 4 | 6.545455 | #####    |  |
| 48 | 1 NL | 2020-15 | 1 NL-East Ne | 2 | 5 | 3.232558 | #####    |  |
| 49 | 1 NL | 2020-15 | 1 NL-East Ne | 3 | 1 | 6.061394 | #####    |  |
| 50 | 1 NL | 2020-15 | 1 NL-East Ne | 3 | 2 | 7.6      | 1.288765 |  |
| 51 | 1 NL | 2020-15 | 1 NL-East Ne | 3 | 3 | 5.727273 | 1.181031 |  |
| 52 | 1 NL | 2020-15 | 1 NL-East Ne | 3 | 4 | 6.833333 | #####    |  |
| 53 | 1 NL | 2020-15 | 1 NL-East Ne | 3 | 5 | 3.060606 | #####    |  |
| 54 | 1 NL | 2020-15 | 1 NL-North N | 1 | 1 | 5.689734 | #####    |  |
| 55 | 1 NL | 2020-15 | 1 NL-North N | 1 | 2 | 7.016482 | 1.541644 |  |
| 56 | 1 NL | 2020-15 | 1 NL-North N | 1 | 3 | 6.367786 | #####    |  |
| 57 | 1 NL | 2020-15 | 1 NL-North N | 1 | 4 | 6.547292 | #####    |  |
| 58 | 1 NL | 2020-15 | 1 NL-North N | 1 | 5 | 2.493487 | #####    |  |
| 59 | 1 NL | 2020-15 | 1 NL-North N | 2 | 1 | 5.090903 | #####    |  |
| 60 | 1 NL | 2020-15 | 1 NL-North N | 2 | 1 | 5.090903 | #####    |  |

|    |      |         |              |   |   |          |          |
|----|------|---------|--------------|---|---|----------|----------|
| 1  |      |         |              |   |   |          |          |
| 2  |      |         |              |   |   |          |          |
| 3  | 1 NL | 2020-15 | 1 NL-North N | 2 | 2 | 5.864865 | 1.017281 |
| 4  | 1 NL | 2020-15 | 1 NL-North N | 2 | 3 | 6.212121 | #####    |
| 5  | 1 NL | 2020-15 | 1 NL-North N | 2 | 4 | 5.257143 | #####    |
| 6  | 1 NL | 2020-15 | 1 NL-North N | 2 | 5 | 2.485714 | #####    |
| 7  | 1 NL | 2020-15 | 1 NL-North N | 3 | 1 | 6.249632 | #####    |
| 8  | 1 NL | 2020-15 | 1 NL-North N | 3 | 2 | 7.846154 | 2.534962 |
| 9  | 1 NL | 2020-15 | 1 NL-North N | 3 | 3 | 6.588235 | 1.944228 |
| 10 | 1 NL | 2020-15 | 1 NL-North N | 3 | 4 | 7.627451 | 1.10551  |
| 11 | 1 NL | 2020-15 | 1 NL-North N | 3 | 5 | 2.5      | #####    |
| 12 | 1 NL | 2020-15 | 1 NL-Overall | 1 | 1 | 5.66465  | #####    |
| 13 | 1 NL | 2020-15 | 1 NL-Overall | 1 | 2 | 6.373089 | #####    |
| 14 | 1 NL | 2020-15 | 1 NL-Overall | 1 | 3 | 6.61885  | #####    |
| 15 | 1 NL | 2020-15 | 1 NL-Overall | 1 | 4 | 6.123325 | #####    |
| 16 | 1 NL | 2020-15 | 1 NL-Overall | 1 | 5 | 2.86462  | #####    |
| 17 | 1 NL | 2020-15 | 1 NL-Overall | 2 | 1 | 5.427796 | #####    |
| 18 | 1 NL | 2020-15 | 1 NL-Overall | 2 | 2 | 6.398554 | #####    |
| 19 | 1 NL | 2020-15 | 1 NL-Overall | 2 | 3 | 6.204316 | #####    |
| 20 | 1 NL | 2020-15 | 1 NL-Overall | 2 | 4 | 5.922057 | #####    |
| 21 | 1 NL | 2020-15 | 1 NL-Overall | 2 | 5 | 2.630848 | #####    |
| 22 | 1 NL | 2020-15 | 1 NL-Overall | 3 | 1 | 5.941303 | #####    |
| 23 | 1 NL | 2020-15 | 1 NL-Overall | 3 | 2 | 6.348294 | #####    |
| 24 | 1 NL | 2020-15 | 1 NL-Overall | 3 | 3 | 7.143291 | #####    |
| 25 | 1 NL | 2020-15 | 1 NL-Overall | 3 | 4 | 6.366289 | #####    |
| 26 | 1 NL | 2020-15 | 1 NL-Overall | 3 | 5 | 3.135344 | #####    |
| 27 | 1 NL | 2020-15 | 1 NL-South N | 1 | 1 | 5.755421 | #####    |
| 28 | 1 NL | 2020-15 | 1 NL-South N | 1 | 2 | 6.834252 | #####    |
| 29 | 1 NL | 2020-15 | 1 NL-South N | 1 | 3 | 6.268621 | #####    |
| 30 | 1 NL | 2020-15 | 1 NL-South N | 1 | 4 | 6.159773 | #####    |
| 31 | 1 NL | 2020-15 | 1 NL-South N | 1 | 5 | 3.772249 | #####    |
| 32 | 1 NL | 2020-15 | 1 NL-South N | 2 | 1 | 5.29476  | #####    |
| 33 | 1 NL | 2020-15 | 1 NL-South N | 2 | 2 | 7.1      | 1.23787  |
| 34 | 1 NL | 2020-15 | 1 NL-South N | 2 | 3 | 5.670588 | #####    |
| 35 | 1 NL | 2020-15 | 1 NL-South N | 2 | 4 | 5.939024 | #####    |
| 36 | 1 NL | 2020-15 | 1 NL-South N | 2 | 5 | 3.083333 | #####    |
| 37 | 1 NL | 2020-15 | 1 NL-South N | 3 | 1 | 6.191752 | #####    |
| 38 | 1 NL | 2020-15 | 1 NL-South N | 3 | 2 | 6.636364 | 1.392458 |
| 39 | 1 NL | 2020-15 | 1 NL-South N | 3 | 3 | 6.931034 | 1.762538 |
| 40 | 1 NL | 2020-15 | 1 NL-South N | 3 | 4 | 6.333333 | #####    |
| 41 | 1 NL | 2020-15 | 1 NL-South N | 3 | 5 | 4.568182 | #####    |
| 42 | 1 NL | 2020-15 | 1 NL-West N  | 1 | 1 | 5.500037 | #####    |
| 43 | 1 NL | 2020-15 | 1 NL-West N  | 1 | 2 | 5.738928 | #####    |
| 44 | 1 NL | 2020-15 | 1 NL-West N  | 1 | 3 | 6.98247  | #####    |
| 45 | 1 NL | 2020-15 | 1 NL-West N  | 1 | 4 | 5.688362 | #####    |
| 46 | 1 NL | 2020-15 | 1 NL-West N  | 1 | 5 | 2.334432 | #####    |
| 47 | 1 NL | 2020-15 | 1 NL-West N  | 2 | 1 | 5.421002 | #####    |
| 48 | 1 NL | 2020-15 | 1 NL-West N  | 2 | 2 | 6.555556 | #####    |
| 49 | 1 NL | 2020-15 | 1 NL-West N  | 2 | 3 | 6.270588 | #####    |
| 50 | 1 NL | 2020-15 | 1 NL-West N  | 2 | 4 | 5.782258 | #####    |
| 51 | 1 NL | 2020-15 | 1 NL-West N  | 2 | 5 | 2.186667 | #####    |
| 52 | 1 NL | 2020-15 | 1 NL-West N  | 3 | 1 | 5.62047  | #####    |
| 53 | 1 NL | 2020-15 | 1 NL-West N  | 3 | 2 | 4.571429 | 1.44198  |
| 54 | 1 NL | 2020-15 | 1 NL-West N  | 3 | 3 | 8.034483 | 1.590536 |
| 55 | 1 NL | 2020-15 | 1 NL-West N  | 3 | 4 | 5.512821 | 1.202771 |
| 56 | 1 NL | 2020-15 | 1 NL-West N  | 3 | 5 | 2.526316 | #####    |
| 57 | 1 NL | 2020-15 | 2 NL-East Ne | 1 | 1 | 2.039433 | #####    |
| 58 | 1 NL | 2020-15 | 2 NL-East Ne | 1 | 2 | 2.628753 | #####    |

1  
2  
3  
4  
5  
6  
7  
8  
9  
10  
11  
12  
13  
14  
15  
16  
17  
18  
19  
20  
21  
22  
23  
24  
25  
26  
27  
28  
29  
30  
31  
32  
33  
34  
35  
36  
37  
38  
39  
40  
41  
42  
43  
44  
45  
46  
47  
48  
49  
50  
51  
52  
53  
54  
55  
56  
57  
58  
59  
60

|      |         |              |   |   |          |          |
|------|---------|--------------|---|---|----------|----------|
| 1 NL | 2020-15 | 2 NL-East Ne | 1 | 3 | 2.105152 | #####    |
| 1 NL | 2020-15 | 2 NL-East Ne | 1 | 4 | 1.959729 | #####    |
| 1 NL | 2020-15 | 2 NL-East Ne | 1 | 5 | 1.344512 | #####    |
| 1 NL | 2020-15 | 2 NL-East Ne | 2 | 1 | 2.062122 | #####    |
| 1 NL | 2020-15 | 2 NL-East Ne | 2 | 2 | 2.547619 | #####    |
| 1 NL | 2020-15 | 2 NL-East Ne | 2 | 3 | 2.478873 | #####    |
| 1 NL | 2020-15 | 2 NL-East Ne | 2 | 4 | 1.791209 | #####    |
| 1 NL | 2020-15 | 2 NL-East Ne | 2 | 5 | 1.409091 | #####    |
| 1 NL | 2020-15 | 2 NL-East Ne | 3 | 1 | 2.018903 | #####    |
| 1 NL | 2020-15 | 2 NL-East Ne | 3 | 2 | 2.6875   | #####    |
| 1 NL | 2020-15 | 2 NL-East Ne | 3 | 3 | 1.777778 | #####    |
| 1 NL | 2020-15 | 2 NL-East Ne | 3 | 4 | 2.122807 | #####    |
| 1 NL | 2020-15 | 2 NL-East Ne | 3 | 5 | 1.272727 | #####    |
| 1 NL | 2020-15 | 2 NL-North N | 1 | 1 | 1.918117 | #####    |
| 1 NL | 2020-15 | 2 NL-North N | 1 | 2 | 2.554572 | #####    |
| 1 NL | 2020-15 | 2 NL-North N | 1 | 3 | 1.734901 | #####    |
| 1 NL | 2020-15 | 2 NL-North N | 1 | 4 | 2.082883 | #####    |
| 1 NL | 2020-15 | 2 NL-North N | 1 | 5 | 1.343423 | #####    |
| 1 NL | 2020-15 | 2 NL-North N | 2 | 1 | 1.941231 | #####    |
| 1 NL | 2020-15 | 2 NL-North N | 2 | 2 | 2.368421 | #####    |
| 1 NL | 2020-15 | 2 NL-North N | 2 | 3 | 2.057143 | #####    |
| 1 NL | 2020-15 | 2 NL-North N | 2 | 4 | 1.930556 | #####    |
| 1 NL | 2020-15 | 2 NL-North N | 2 | 5 | 1.4      | #####    |
| 1 NL | 2020-15 | 2 NL-North N | 3 | 1 | 1.896354 | #####    |
| 1 NL | 2020-15 | 2 NL-North N | 3 | 2 | 2.692308 | 1.183806 |
| 1 NL | 2020-15 | 2 NL-North N | 3 | 3 | 1.277778 | #####    |
| 1 NL | 2020-15 | 2 NL-North N | 3 | 4 | 2.211538 | #####    |
| 1 NL | 2020-15 | 2 NL-North N | 3 | 5 | 1.297297 | #####    |
| 1 NL | 2020-15 | 2 NL-Overall | 1 | 1 | 1.95541  | #####    |
| 1 NL | 2020-15 | 2 NL-Overall | 1 | 2 | 2.52427  | #####    |
| 1 NL | 2020-15 | 2 NL-Overall | 1 | 3 | 2.171646 | #####    |
| 1 NL | 2020-15 | 2 NL-Overall | 1 | 4 | 1.745498 | #####    |
| 1 NL | 2020-15 | 2 NL-Overall | 1 | 5 | 1.352071 | #####    |
| 1 NL | 2020-15 | 2 NL-Overall | 2 | 1 | 1.925826 | #####    |
| 1 NL | 2020-15 | 2 NL-Overall | 2 | 2 | 2.506367 | #####    |
| 1 NL | 2020-15 | 2 NL-Overall | 2 | 3 | 2.233978 | #####    |
| 1 NL | 2020-15 | 2 NL-Overall | 2 | 4 | 1.696587 | #####    |
| 1 NL | 2020-15 | 2 NL-Overall | 2 | 5 | 1.209629 | #####    |
| 1 NL | 2020-15 | 2 NL-Overall | 3 | 1 | 1.989741 | #####    |
| 1 NL | 2020-15 | 2 NL-Overall | 3 | 2 | 2.541855 | #####    |
| 1 NL | 2020-15 | 2 NL-Overall | 3 | 3 | 2.092804 | #####    |
| 1 NL | 2020-15 | 2 NL-Overall | 3 | 4 | 1.803326 | #####    |
| 1 NL | 2020-15 | 2 NL-Overall | 3 | 5 | 1.516008 | #####    |
| 1 NL | 2020-15 | 2 NL-South N | 1 | 1 | 2.045131 | #####    |
| 1 NL | 2020-15 | 2 NL-South N | 1 | 2 | 2.910359 | #####    |
| 1 NL | 2020-15 | 2 NL-South N | 1 | 3 | 2.243865 | #####    |
| 1 NL | 2020-15 | 2 NL-South N | 1 | 4 | 1.65824  | #####    |
| 1 NL | 2020-15 | 2 NL-South N | 1 | 5 | 1.562895 | #####    |
| 1 NL | 2020-15 | 2 NL-South N | 2 | 1 | 2.093896 | #####    |
| 1 NL | 2020-15 | 2 NL-South N | 2 | 2 | 3.117647 | #####    |
| 1 NL | 2020-15 | 2 NL-South N | 2 | 3 | 2.505618 | #####    |
| 1 NL | 2020-15 | 2 NL-South N | 2 | 4 | 1.647727 | #####    |
| 1 NL | 2020-15 | 2 NL-South N | 2 | 5 | 1.333333 | #####    |
| 1 NL | 2020-15 | 2 NL-South N | 3 | 1 | 1.999519 | #####    |
| 1 NL | 2020-15 | 2 NL-South N | 3 | 2 | 2.75     | #####    |
| 1 NL | 2020-15 | 2 NL-South N | 3 | 3 | 1.96875  | #####    |



|    |      |         |              |   |   |          |       |  |
|----|------|---------|--------------|---|---|----------|-------|--|
| 1  |      |         |              |   |   |          |       |  |
| 2  |      |         |              |   |   |          |       |  |
| 3  | 1 NL | 2020-15 | 2 NL-South N | 3 | 4 | 1.666667 | ##### |  |
| 4  | 1 NL | 2020-15 | 2 NL-South N | 3 | 5 | 1.822222 | ##### |  |
| 5  | 1 NL | 2020-15 | 2 NL-West N  | 1 | 1 | 1.883199 | ##### |  |
| 6  | 1 NL | 2020-15 | 2 NL-West N  | 1 | 2 | 2.279079 | ##### |  |
| 7  | 1 NL | 2020-15 | 2 NL-West N  | 1 | 3 | 2.242687 | ##### |  |
| 8  | 1 NL | 2020-15 | 2 NL-West N  | 1 | 4 | 1.593284 | ##### |  |
| 9  | 1 NL | 2020-15 | 2 NL-West N  | 1 | 5 | 1.240395 | ##### |  |
| 10 | 1 NL | 2020-15 | 2 NL-West N  | 2 | 1 | 1.810552 | ##### |  |
| 11 | 1 NL | 2020-15 | 2 NL-West N  | 2 | 2 | 2.3      | ##### |  |
| 12 | 1 NL | 2020-15 | 2 NL-West N  | 2 | 3 | 2.097826 | ##### |  |
| 13 | 1 NL | 2020-15 | 2 NL-West N  | 2 | 4 | 1.633588 | ##### |  |
| 14 | 1 NL | 2020-15 | 2 NL-West N  | 2 | 5 | 1.026316 | ##### |  |
| 15 | 1 NL | 2020-15 | 2 NL-West N  | 3 | 1 | 1.993313 | ##### |  |
| 16 | 1 NL | 2020-15 | 2 NL-West N  | 3 | 2 | 2.25     | ##### |  |
| 17 | 1 NL | 2020-15 | 2 NL-West N  | 3 | 3 | 2.466667 | ##### |  |
| 18 | 1 NL | 2020-15 | 2 NL-West N  | 3 | 4 | 1.522727 | ##### |  |
| 19 | 1 NL | 2020-15 | 2 NL-West N  | 3 | 5 | 1.517241 | ##### |  |
| 20 | 1 NL | 2020-15 | 3 NL-East Ne | 1 | 1 | #####    | ##### |  |
| 21 | 1 NL | 2020-15 | 3 NL-East Ne | 1 | 2 | 0        | 0     |  |
| 22 | 1 NL | 2020-15 | 3 NL-East Ne | 1 | 3 | 0        | 0     |  |
| 23 | 1 NL | 2020-15 | 3 NL-East Ne | 1 | 4 | #####    | ##### |  |
| 24 | 1 NL | 2020-15 | 3 NL-East Ne | 1 | 5 | #####    | ##### |  |
| 25 | 1 NL | 2020-15 | 3 NL-East Ne | 2 | 1 | #####    | ##### |  |
| 26 | 1 NL | 2020-15 | 3 NL-East Ne | 2 | 2 | 0        | 0     |  |
| 27 | 1 NL | 2020-15 | 3 NL-East Ne | 2 | 3 | 0        | 0     |  |
| 28 | 1 NL | 2020-15 | 3 NL-East Ne | 2 | 4 | #####    | ##### |  |
| 29 | 1 NL | 2020-15 | 3 NL-East Ne | 2 | 5 | #####    | ##### |  |
| 30 | 1 NL | 2020-15 | 3 NL-East Ne | 3 | 1 | 0        | 0     |  |
| 31 | 1 NL | 2020-15 | 3 NL-East Ne | 3 | 2 | 0        | 0     |  |
| 32 | 1 NL | 2020-15 | 3 NL-East Ne | 3 | 3 | 0        | 0     |  |
| 33 | 1 NL | 2020-15 | 3 NL-East Ne | 3 | 4 | 0        | 0     |  |
| 34 | 1 NL | 2020-15 | 3 NL-East Ne | 3 | 5 | 0        | 0     |  |
| 35 | 1 NL | 2020-15 | 3 NL-East Ne | 3 | 5 | 0        | 0     |  |
| 36 | 1 NL | 2020-15 | 3 NL-North N | 1 | 1 | #####    | ##### |  |
| 37 | 1 NL | 2020-15 | 3 NL-North N | 1 | 2 | 0        | 0     |  |
| 38 | 1 NL | 2020-15 | 3 NL-North N | 1 | 3 | 0        | 0     |  |
| 39 | 1 NL | 2020-15 | 3 NL-North N | 1 | 4 | #####    | ##### |  |
| 40 | 1 NL | 2020-15 | 3 NL-North N | 1 | 5 | #####    | ##### |  |
| 41 | 1 NL | 2020-15 | 3 NL-North N | 2 | 1 | #####    | ##### |  |
| 42 | 1 NL | 2020-15 | 3 NL-North N | 2 | 2 | 0        | 0     |  |
| 43 | 1 NL | 2020-15 | 3 NL-North N | 2 | 3 | 0        | 0     |  |
| 44 | 1 NL | 2020-15 | 3 NL-North N | 2 | 4 | #####    | ##### |  |
| 45 | 1 NL | 2020-15 | 3 NL-North N | 2 | 5 | #####    | ##### |  |
| 46 | 1 NL | 2020-15 | 3 NL-North N | 3 | 1 | #####    | ##### |  |
| 47 | 1 NL | 2020-15 | 3 NL-North N | 3 | 2 | 0        | 0     |  |
| 48 | 1 NL | 2020-15 | 3 NL-North N | 3 | 3 | 0        | 0     |  |
| 49 | 1 NL | 2020-15 | 3 NL-North N | 3 | 4 | #####    | ##### |  |
| 50 | 1 NL | 2020-15 | 3 NL-North N | 3 | 5 | #####    | ##### |  |
| 51 | 1 NL | 2020-15 | 3 NL-Overall | 1 | 1 | #####    | ##### |  |
| 52 | 1 NL | 2020-15 | 3 NL-Overall | 1 | 2 | #####    | ##### |  |
| 53 | 1 NL | 2020-15 | 3 NL-Overall | 1 | 3 | #####    | ##### |  |
| 54 | 1 NL | 2020-15 | 3 NL-Overall | 1 | 4 | #####    | ##### |  |
| 55 | 1 NL | 2020-15 | 3 NL-Overall | 1 | 5 | #####    | ##### |  |
| 56 | 1 NL | 2020-15 | 3 NL-Overall | 2 | 1 | #####    | ##### |  |
| 57 | 1 NL | 2020-15 | 3 NL-Overall | 2 | 2 | #####    | ##### |  |
| 58 | 1 NL | 2020-15 | 3 NL-Overall | 2 | 3 | #####    | ##### |  |
| 59 | 1 NL | 2020-15 | 3 NL-Overall | 2 | 4 | #####    | ##### |  |
| 60 | 1 NL | 2020-15 | 3 NL-Overall | 2 | 4 | #####    | ##### |  |

1  
2  
3  
4  
5  
6  
7  
8  
9  
10  
11  
12  
13  
14  
15  
16  
17  
18  
19  
20  
21  
22  
23  
24  
25  
26  
27  
28  
29  
30  
31  
32  
33  
34  
35  
36  
37  
38  
39  
40  
41  
42  
43  
44  
45  
46  
47  
48  
49  
50  
51  
52  
53  
54  
55  
56  
57  
58  
59  
60

|      |         |              |   |   |          |          |
|------|---------|--------------|---|---|----------|----------|
| 1 NL | 2020-15 | 3 NL-Overall | 2 | 5 | #####    | #####    |
| 1 NL | 2020-15 | 3 NL-Overall | 3 | 1 | #####    | #####    |
| 1 NL | 2020-15 | 3 NL-Overall | 3 | 2 | #####    | #####    |
| 1 NL | 2020-15 | 3 NL-Overall | 3 | 3 | #####    | #####    |
| 1 NL | 2020-15 | 3 NL-Overall | 3 | 4 | #####    | #####    |
| 1 NL | 2020-15 | 3 NL-Overall | 3 | 5 | #####    | #####    |
| 1 NL | 2020-15 | 3 NL-South N | 1 | 1 | #####    | #####    |
| 1 NL | 2020-15 | 3 NL-South N | 1 | 2 | #####    | #####    |
| 1 NL | 2020-15 | 3 NL-South N | 1 | 3 | 0        | 0        |
| 1 NL | 2020-15 | 3 NL-South N | 1 | 4 | #####    | #####    |
| 1 NL | 2020-15 | 3 NL-South N | 1 | 5 | 0        | 0        |
| 1 NL | 2020-15 | 3 NL-South N | 2 | 1 | #####    | #####    |
| 1 NL | 2020-15 | 3 NL-South N | 2 | 2 | #####    | #####    |
| 1 NL | 2020-15 | 3 NL-South N | 2 | 3 | 0        | 0        |
| 1 NL | 2020-15 | 3 NL-South N | 2 | 4 | #####    | #####    |
| 1 NL | 2020-15 | 3 NL-South N | 2 | 5 | 0        | 0        |
| 1 NL | 2020-15 | 3 NL-South N | 3 | 1 | #####    | #####    |
| 1 NL | 2020-15 | 3 NL-South N | 3 | 2 | 0.25     | #####    |
| 1 NL | 2020-15 | 3 NL-South N | 3 | 3 | 0        | 0        |
| 1 NL | 2020-15 | 3 NL-South N | 3 | 4 | 0.25     | #####    |
| 1 NL | 2020-15 | 3 NL-South N | 3 | 5 | 0        | 0        |
| 1 NL | 2020-15 | 3 NL-West N  | 1 | 1 | #####    | #####    |
| 1 NL | 2020-15 | 3 NL-West N  | 1 | 2 | 0        | 0        |
| 1 NL | 2020-15 | 3 NL-West N  | 1 | 3 | #####    | #####    |
| 1 NL | 2020-15 | 3 NL-West N  | 1 | 4 | #####    | #####    |
| 1 NL | 2020-15 | 3 NL-West N  | 1 | 5 | 0        | 0        |
| 1 NL | 2020-15 | 3 NL-West N  | 2 | 1 | #####    | #####    |
| 1 NL | 2020-15 | 3 NL-West N  | 2 | 2 | 0        | 0        |
| 1 NL | 2020-15 | 3 NL-West N  | 2 | 3 | #####    | #####    |
| 1 NL | 2020-15 | 3 NL-West N  | 2 | 4 | #####    | #####    |
| 1 NL | 2020-15 | 3 NL-West N  | 2 | 5 | 0        | 0        |
| 1 NL | 2020-15 | 3 NL-West N  | 3 | 1 | #####    | #####    |
| 1 NL | 2020-15 | 3 NL-West N  | 3 | 2 | 0        | 0        |
| 1 NL | 2020-15 | 3 NL-West N  | 3 | 3 | #####    | #####    |
| 1 NL | 2020-15 | 3 NL-West N  | 3 | 4 | 0        | 0        |
| 1 NL | 2020-15 | 3 NL-West N  | 3 | 5 | 0        | 0        |
| 1 NL | 2020-15 | 4 NL-East Ne | 1 | 1 | 2.307279 | #####    |
| 1 NL | 2020-15 | 4 NL-East Ne | 1 | 2 | 3.076847 | #####    |
| 1 NL | 2020-15 | 4 NL-East Ne | 1 | 3 | 2.668897 | #####    |
| 1 NL | 2020-15 | 4 NL-East Ne | 1 | 4 | 2.618613 | #####    |
| 1 NL | 2020-15 | 4 NL-East Ne | 1 | 5 | #####    | #####    |
| 1 NL | 2020-15 | 4 NL-East Ne | 2 | 1 | 2.08571  | #####    |
| 1 NL | 2020-15 | 4 NL-East Ne | 2 | 2 | 2.275    | #####    |
| 1 NL | 2020-15 | 4 NL-East Ne | 2 | 3 | 2.928571 | #####    |
| 1 NL | 2020-15 | 4 NL-East Ne | 2 | 4 | 2.443182 | #####    |
| 1 NL | 2020-15 | 4 NL-East Ne | 2 | 5 | #####    | #####    |
| 1 NL | 2020-15 | 4 NL-East Ne | 3 | 1 | 2.512267 | #####    |
| 1 NL | 2020-15 | 4 NL-East Ne | 3 | 2 | 3.666667 | 1.235458 |
| 1 NL | 2020-15 | 4 NL-East Ne | 3 | 3 | 2.424242 | #####    |
| 1 NL | 2020-15 | 4 NL-East Ne | 3 | 4 | 2.785714 | #####    |
| 1 NL | 2020-15 | 4 NL-East Ne | 3 | 5 | #####    | #####    |
| 1 NL | 2020-15 | 4 NL-North N | 1 | 1 | 1.989505 | #####    |
| 1 NL | 2020-15 | 4 NL-North N | 1 | 2 | 2.666482 | #####    |
| 1 NL | 2020-15 | 4 NL-North N | 1 | 3 | 2.373653 | #####    |
| 1 NL | 2020-15 | 4 NL-North N | 1 | 4 | 2.647075 | #####    |
| 1 NL | 2020-15 | 4 NL-North N | 1 | 5 | #####    | #####    |

|    |      |         |              |   |   |          |          |  |
|----|------|---------|--------------|---|---|----------|----------|--|
| 1  |      |         |              |   |   |          |          |  |
| 2  |      |         |              |   |   |          |          |  |
| 3  | 1 NL | 2020-15 | 4 NL-North N | 2 | 1 | 1.753345 | #####    |  |
| 4  | 1 NL | 2020-15 | 4 NL-North N | 2 | 2 | 2.631579 | 1.008021 |  |
| 5  | 1 NL | 2020-15 | 4 NL-North N | 2 | 3 | 2.38806  | #####    |  |
| 6  | 1 NL | 2020-15 | 4 NL-North N | 2 | 4 | 1.757143 | #####    |  |
| 7  | 1 NL | 2020-15 | 4 NL-North N | 2 | 5 | 0        | 0        |  |
| 8  | 1 NL | 2020-15 | 4 NL-North N | 3 | 1 | 2.211002 | #####    |  |
| 9  | 1 NL | 2020-15 | 4 NL-North N | 3 | 2 | 2.692308 | 1.505173 |  |
| 10 | 1 NL | 2020-15 | 4 NL-North N | 3 | 3 | 2.352941 | #####    |  |
| 11 | 1 NL | 2020-15 | 4 NL-North N | 3 | 4 | 3.392157 | #####    |  |
| 12 | 1 NL | 2020-15 | 4 NL-North N | 3 | 5 | #####    | #####    |  |
| 13 | 1 NL | 2020-15 | 4 NL-Overall | 1 | 1 | 2.097728 | #####    |  |
| 14 | 1 NL | 2020-15 | 4 NL-Overall | 1 | 2 | 2.473652 | #####    |  |
| 15 | 1 NL | 2020-15 | 4 NL-Overall | 1 | 3 | 2.455428 | #####    |  |
| 16 | 1 NL | 2020-15 | 4 NL-Overall | 1 | 4 | 2.80583  | #####    |  |
| 17 | 1 NL | 2020-15 | 4 NL-Overall | 1 | 5 | #####    | #####    |  |
| 18 | 1 NL | 2020-15 | 4 NL-Overall | 2 | 1 | 2.022624 | #####    |  |
| 19 | 1 NL | 2020-15 | 4 NL-Overall | 2 | 2 | 2.542521 | #####    |  |
| 20 | 1 NL | 2020-15 | 4 NL-Overall | 2 | 3 | 2.219619 | #####    |  |
| 21 | 1 NL | 2020-15 | 4 NL-Overall | 2 | 4 | 2.75686  | #####    |  |
| 22 | 1 NL | 2020-15 | 4 NL-Overall | 2 | 5 | #####    | #####    |  |
| 23 | 1 NL | 2020-15 | 4 NL-Overall | 3 | 1 | 2.18637  | #####    |  |
| 24 | 1 NL | 2020-15 | 4 NL-Overall | 3 | 2 | 2.405019 | #####    |  |
| 25 | 1 NL | 2020-15 | 4 NL-Overall | 3 | 3 | 2.760095 | #####    |  |
| 26 | 1 NL | 2020-15 | 4 NL-Overall | 3 | 4 | 2.864616 | #####    |  |
| 27 | 1 NL | 2020-15 | 4 NL-Overall | 3 | 5 | #####    | #####    |  |
| 28 | 1 NL | 2020-15 | 4 NL-Overall | 3 | 5 | #####    | #####    |  |
| 29 | 1 NL | 2020-15 | 4 NL-South N | 1 | 1 | 2.018753 | #####    |  |
| 30 | 1 NL | 2020-15 | 4 NL-South N | 1 | 2 | 2.42539  | #####    |  |
| 31 | 1 NL | 2020-15 | 4 NL-South N | 1 | 3 | 2.279715 | #####    |  |
| 32 | 1 NL | 2020-15 | 4 NL-South N | 1 | 4 | 2.73184  | #####    |  |
| 33 | 1 NL | 2020-15 | 4 NL-South N | 1 | 5 | #####    | #####    |  |
| 34 | 1 NL | 2020-15 | 4 NL-South N | 2 | 1 | 1.870957 | #####    |  |
| 35 | 1 NL | 2020-15 | 4 NL-South N | 2 | 2 | 2.741935 | 1.087368 |  |
| 36 | 1 NL | 2020-15 | 4 NL-South N | 2 | 3 | 1.735632 | #####    |  |
| 37 | 1 NL | 2020-15 | 4 NL-South N | 2 | 4 | 2.658537 | #####    |  |
| 38 | 1 NL | 2020-15 | 4 NL-South N | 2 | 5 | #####    | #####    |  |
| 39 | 1 NL | 2020-15 | 4 NL-South N | 3 | 1 | 2.161143 | #####    |  |
| 40 | 1 NL | 2020-15 | 4 NL-South N | 3 | 2 | 2.181818 | 1.163077 |  |
| 41 | 1 NL | 2020-15 | 4 NL-South N | 3 | 3 | 2.896552 | 1.145223 |  |
| 42 | 1 NL | 2020-15 | 4 NL-South N | 3 | 4 | 2.789474 | #####    |  |
| 43 | 1 NL | 2020-15 | 4 NL-South N | 3 | 5 | #####    | #####    |  |
| 44 | 1 NL | 2020-15 | 4 NL-West N  | 1 | 1 | 2.062989 | #####    |  |
| 45 | 1 NL | 2020-15 | 4 NL-West N  | 1 | 2 | 2.101502 | #####    |  |
| 46 | 1 NL | 2020-15 | 4 NL-West N  | 1 | 3 | 2.460506 | #####    |  |
| 47 | 1 NL | 2020-15 | 4 NL-West N  | 1 | 4 | 2.983047 | #####    |  |
| 48 | 1 NL | 2020-15 | 4 NL-West N  | 1 | 5 | 0        | 0        |  |
| 49 | 1 NL | 2020-15 | 4 NL-West N  | 2 | 1 | 2.107128 | #####    |  |
| 50 | 1 NL | 2020-15 | 4 NL-West N  | 2 | 2 | 2.563636 | #####    |  |
| 51 | 1 NL | 2020-15 | 4 NL-West N  | 2 | 3 | 2.149425 | #####    |  |
| 52 | 1 NL | 2020-15 | 4 NL-West N  | 2 | 4 | 3.094488 | #####    |  |
| 53 | 1 NL | 2020-15 | 4 NL-West N  | 2 | 5 | 0        | 0        |  |
| 54 | 1 NL | 2020-15 | 4 NL-West N  | 3 | 1 | 1.994901 | #####    |  |
| 55 | 1 NL | 2020-15 | 4 NL-West N  | 3 | 2 | 1.428571 | 1.376801 |  |
| 56 | 1 NL | 2020-15 | 4 NL-West N  | 3 | 3 | 2.931034 | #####    |  |
| 57 | 1 NL | 2020-15 | 4 NL-West N  | 3 | 4 | 2.775    | #####    |  |
| 58 | 1 NL | 2020-15 | 4 NL-West N  | 3 | 5 | 0        | 0        |  |
| 59 | 1 NL | 2020-15 | 4 NL-West N  | 3 | 5 | 0        | 0        |  |
| 60 | 1 NL | 2020-15 | 5 NL-East Ne | 1 | 1 | 1.772162 | #####    |  |

1  
2  
3  
4  
5  
6  
7  
8  
9  
10  
11  
12  
13  
14  
15  
16  
17  
18  
19  
20  
21  
22  
23  
24  
25  
26  
27  
28  
29  
30  
31  
32  
33  
34  
35  
36  
37  
38  
39  
40  
41  
42  
43  
44  
45  
46  
47  
48  
49  
50  
51  
52  
53  
54  
55  
56  
57  
58  
59  
60

|      |         |              |   |   |          |          |
|------|---------|--------------|---|---|----------|----------|
| 1 NL | 2020-15 | 5 NL-East Ne | 1 | 2 | 1.371212 | #####    |
| 1 NL | 2020-15 | 5 NL-East Ne | 1 | 3 | 1.941346 | #####    |
| 1 NL | 2020-15 | 5 NL-East Ne | 1 | 4 | 2.046504 | #####    |
| 1 NL | 2020-15 | 5 NL-East Ne | 1 | 5 | 1.481882 | #####    |
| 1 NL | 2020-15 | 5 NL-East Ne | 2 | 1 | 1.705661 | #####    |
| 1 NL | 2020-15 | 5 NL-East Ne | 2 | 2 | 1.365854 | #####    |
| 1 NL | 2020-15 | 5 NL-East Ne | 2 | 3 | 1.375    | #####    |
| 1 NL | 2020-15 | 5 NL-East Ne | 2 | 4 | 2.21978  | #####    |
| 1 NL | 2020-15 | 5 NL-East Ne | 2 | 5 | 1.674419 | #####    |
| 1 NL | 2020-15 | 5 NL-East Ne | 3 | 1 | 1.832691 | #####    |
| 1 NL | 2020-15 | 5 NL-East Ne | 3 | 2 | 1.375    | #####    |
| 1 NL | 2020-15 | 5 NL-East Ne | 3 | 3 | 2.444444 | #####    |
| 1 NL | 2020-15 | 5 NL-East Ne | 3 | 4 | 1.872727 | #####    |
| 1 NL | 2020-15 | 5 NL-East Ne | 3 | 5 | 1.272727 | #####    |
| 1 NL | 2020-15 | 5 NL-North N | 1 | 1 | 1.78822  | #####    |
| 1 NL | 2020-15 | 5 NL-North N | 1 | 2 | 2.030254 | #####    |
| 1 NL | 2020-15 | 5 NL-North N | 1 | 3 | 2.256705 | #####    |
| 1 NL | 2020-15 | 5 NL-North N | 1 | 4 | 1.717136 | #####    |
| 1 NL | 2020-15 | 5 NL-North N | 1 | 5 | 1.073481 | #####    |
| 1 NL | 2020-15 | 5 NL-North N | 2 | 1 | 1.51923  | #####    |
| 1 NL | 2020-15 | 5 NL-North N | 2 | 2 | 1.447368 | #####    |
| 1 NL | 2020-15 | 5 NL-North N | 2 | 3 | 1.884058 | #####    |
| 1 NL | 2020-15 | 5 NL-North N | 2 | 4 | 1.492958 | #####    |
| 1 NL | 2020-15 | 5 NL-North N | 2 | 5 | 1.028571 | #####    |
| 1 NL | 2020-15 | 5 NL-North N | 3 | 1 | 2.040883 | #####    |
| 1 NL | 2020-15 | 5 NL-North N | 3 | 2 | 2.461538 | #####    |
| 1 NL | 2020-15 | 5 NL-North N | 3 | 3 | 2.777778 | 1.084713 |
| 1 NL | 2020-15 | 5 NL-North N | 3 | 4 | 1.903846 | #####    |
| 1 NL | 2020-15 | 5 NL-North N | 3 | 5 | 1.111111 | #####    |
| 1 NL | 2020-15 | 5 NL-Overall | 1 | 1 | 1.764564 | #####    |
| 1 NL | 2020-15 | 5 NL-Overall | 1 | 2 | 1.8594   | #####    |
| 1 NL | 2020-15 | 5 NL-Overall | 1 | 3 | 2.023372 | #####    |
| 1 NL | 2020-15 | 5 NL-Overall | 1 | 4 | 1.655167 | #####    |
| 1 NL | 2020-15 | 5 NL-Overall | 1 | 5 | 1.404506 | #####    |
| 1 NL | 2020-15 | 5 NL-Overall | 2 | 1 | 1.580029 | #####    |
| 1 NL | 2020-15 | 5 NL-Overall | 2 | 2 | 1.718347 | #####    |
| 1 NL | 2020-15 | 5 NL-Overall | 2 | 3 | 1.781307 | #####    |
| 1 NL | 2020-15 | 5 NL-Overall | 2 | 4 | 1.490476 | #####    |
| 1 NL | 2020-15 | 5 NL-Overall | 2 | 5 | 1.244837 | #####    |
| 1 NL | 2020-15 | 5 NL-Overall | 3 | 1 | 1.979062 | #####    |
| 1 NL | 2020-15 | 5 NL-Overall | 3 | 2 | 1.995334 | #####    |
| 1 NL | 2020-15 | 5 NL-Overall | 3 | 3 | 2.328367 | #####    |
| 1 NL | 2020-15 | 5 NL-Overall | 3 | 4 | 1.853871 | #####    |
| 1 NL | 2020-15 | 5 NL-Overall | 3 | 5 | 1.588939 | #####    |
| 1 NL | 2020-15 | 5 NL-South N | 1 | 1 | 1.648476 | #####    |
| 1 NL | 2020-15 | 5 NL-South N | 1 | 2 | 1.398149 | #####    |
| 1 NL | 2020-15 | 5 NL-South N | 1 | 3 | 1.670505 | #####    |
| 1 NL | 2020-15 | 5 NL-South N | 1 | 4 | 1.72866  | #####    |
| 1 NL | 2020-15 | 5 NL-South N | 1 | 5 | 1.715258 | #####    |
| 1 NL | 2020-15 | 5 NL-South N | 2 | 1 | 1.23065  | #####    |
| 1 NL | 2020-15 | 5 NL-South N | 2 | 2 | 1.151515 | #####    |
| 1 NL | 2020-15 | 5 NL-South N | 2 | 3 | 1.337079 | #####    |
| 1 NL | 2020-15 | 5 NL-South N | 2 | 4 | 1.375    | #####    |
| 1 NL | 2020-15 | 5 NL-South N | 2 | 5 | #####    | #####    |
| 1 NL | 2020-15 | 5 NL-South N | 3 | 1 | 2.044685 | #####    |
| 1 NL | 2020-15 | 5 NL-South N | 3 | 2 | 1.583333 | #####    |

|    |      |         |              |   |   |          |          |  |
|----|------|---------|--------------|---|---|----------|----------|--|
| 1  |      |         |              |   |   |          |          |  |
| 2  |      |         |              |   |   |          |          |  |
| 3  | 1 NL | 2020-15 | 5 NL-South M | 3 | 3 | 2.032258 | #####    |  |
| 4  | 1 NL | 2020-15 | 5 NL-South M | 3 | 4 | 2.016949 | #####    |  |
| 5  | 1 NL | 2020-15 | 5 NL-South M | 3 | 5 | 2.555556 | #####    |  |
| 6  | 1 NL | 2020-15 | 5 NL-West N  | 1 | 1 | 1.810593 | #####    |  |
| 7  | 1 NL | 2020-15 | 5 NL-West N  | 1 | 2 | 2.296392 | #####    |  |
| 8  | 1 NL | 2020-15 | 5 NL-West N  | 1 | 3 | 2.159422 | #####    |  |
| 9  | 1 NL | 2020-15 | 5 NL-West N  | 1 | 4 | 1.401807 | #####    |  |
| 10 | 1 NL | 2020-15 | 5 NL-West N  | 1 | 5 | 1.283735 | #####    |  |
| 11 | 1 NL | 2020-15 | 5 NL-West N  | 2 | 1 | 1.67914  | #####    |  |
| 12 | 1 NL | 2020-15 | 5 NL-West N  | 2 | 2 | 2.101695 | #####    |  |
| 13 | 1 NL | 2020-15 | 5 NL-West N  | 2 | 3 | 2.044444 | #####    |  |
| 14 | 1 NL | 2020-15 | 5 NL-West N  | 2 | 4 | 1.236641 | #####    |  |
| 15 | 1 NL | 2020-15 | 5 NL-West N  | 2 | 5 | 1.263158 | #####    |  |
| 16 | 1 NL | 2020-15 | 5 NL-West N  | 3 | 1 | 2.008829 | #####    |  |
| 17 | 1 NL | 2020-15 | 5 NL-West N  | 3 | 2 | 2.5625   | 1.179311 |  |
| 18 | 1 NL | 2020-15 | 5 NL-West N  | 3 | 3 | 2.333333 | #####    |  |
| 19 | 1 NL | 2020-15 | 5 NL-West N  | 3 | 4 | 1.697674 | #####    |  |
| 20 | 1 NL | 2020-15 | 5 NL-West N  | 3 | 5 | 1.310345 | #####    |  |
| 21 | 1 UK | 2020-11 | 1 UK-Englan  | 1 | 1 | 9.162855 | #####    |  |
| 22 | 1 UK | 2020-11 | 1 UK-Englan  | 1 | 2 | 9.908344 | 1.161415 |  |
| 23 | 1 UK | 2020-11 | 1 UK-Englan  | 1 | 3 | 10.62589 | 1.209501 |  |
| 24 | 1 UK | 2020-11 | 1 UK-Englan  | 1 | 4 | 7.648997 | #####    |  |
| 25 | 1 UK | 2020-11 | 1 UK-Englan  | 1 | 5 | 7.771306 | #####    |  |
| 26 | 1 UK | 2020-11 | 1 UK-Englan  | 2 | 1 | 8.595327 | #####    |  |
| 27 | 1 UK | 2020-11 | 1 UK-Englan  | 2 | 2 | 10.7     | 1.521907 |  |
| 28 | 1 UK | 2020-11 | 1 UK-Englan  | 2 | 3 | 9.213115 | 1.051839 |  |
| 29 | 1 UK | 2020-11 | 1 UK-Englan  | 2 | 4 | 7.806122 | #####    |  |
| 30 | 1 UK | 2020-11 | 1 UK-Englan  | 2 | 5 | 6.866667 | #####    |  |
| 31 | 1 UK | 2020-11 | 1 UK-Englan  | 3 | 1 | 9.569311 | #####    |  |
| 32 | 1 UK | 2020-11 | 1 UK-Englan  | 3 | 2 | 9.518519 | 1.55951  |  |
| 33 | 1 UK | 2020-11 | 1 UK-Englan  | 3 | 3 | 11.58333 | 1.889169 |  |
| 34 | 1 UK | 2020-11 | 1 UK-Englan  | 3 | 4 | 7.516129 | #####    |  |
| 35 | 1 UK | 2020-11 | 1 UK-Englan  | 3 | 5 | 8.694915 | 1.116986 |  |
| 36 | 1 UK | 2020-11 | 1 UK-London  | 1 | 1 | 8.799951 | #####    |  |
| 37 | 1 UK | 2020-11 | 1 UK-London  | 1 | 2 | 9.99544  | 2.179172 |  |
| 38 | 1 UK | 2020-11 | 1 UK-London  | 1 | 3 | 8.368653 | 1.447768 |  |
| 39 | 1 UK | 2020-11 | 1 UK-London  | 1 | 4 | 9.373919 | 1.274146 |  |
| 40 | 1 UK | 2020-11 | 1 UK-London  | 1 | 5 | 5.707842 | 1.116452 |  |
| 41 | 1 UK | 2020-11 | 1 UK-London  | 2 | 1 | 8.361794 | 1.102537 |  |
| 42 | 1 UK | 2020-11 | 1 UK-London  | 2 | 2 | 9.625    | 2.351812 |  |
| 43 | 1 UK | 2020-11 | 1 UK-London  | 2 | 3 | 8.47619  | 2.17985  |  |
| 44 | 1 UK | 2020-11 | 1 UK-London  | 2 | 4 | 7.5      | 1.001802 |  |
| 45 | 1 UK | 2020-11 | 1 UK-London  | 2 | 5 | 6.444444 | 1.491732 |  |
| 46 | 1 UK | 2020-11 | 1 UK-London  | 3 | 1 | 9.175658 | 1.379762 |  |
| 47 | 1 UK | 2020-11 | 1 UK-London  | 3 | 2 | 10.27273 | 3.377573 |  |
| 48 | 1 UK | 2020-11 | 1 UK-London  | 3 | 3 | 8.272727 | 1.928993 |  |
| 49 | 1 UK | 2020-11 | 1 UK-London  | 3 | 4 | 11.42105 | 2.348395 |  |
| 50 | 1 UK | 2020-11 | 1 UK-London  | 3 | 5 | 5.25     | 1.541771 |  |
| 51 | 1 UK | 2020-11 | 1 UK-Norther | 1 | 1 | 10.68027 | 1.656006 |  |
| 52 | 1 UK | 2020-11 | 1 UK-Norther | 1 | 2 | 12.48331 | 3.924888 |  |
| 53 | 1 UK | 2020-11 | 1 UK-Norther | 1 | 3 | 11.32505 | 2.080017 |  |
| 54 | 1 UK | 2020-11 | 1 UK-Norther | 1 | 4 | 10.50356 | 2.095144 |  |
| 55 | 1 UK | 2020-11 | 1 UK-Norther | 1 | 5 | 5.147564 | 1.030384 |  |
| 56 | 1 UK | 2020-11 | 1 UK-Norther | 2 | 1 | 9.344784 | 1.21648  |  |
| 57 | 1 UK | 2020-11 | 1 UK-Norther | 2 | 2 | 9.25     | 3.09001  |  |
| 58 | 1 UK | 2020-11 | 1 UK-Norther | 2 | 3 | 10.3     | 1.945767 |  |
| 59 | 1 UK | 2020-11 | 1 UK-Norther | 2 |   |          |          |  |
| 60 | 1 UK | 2020-11 | 1 UK-Norther | 2 |   |          |          |  |

|    |      |         |              |   |   |          |          |
|----|------|---------|--------------|---|---|----------|----------|
| 1  |      |         |              |   |   |          |          |
| 2  |      |         |              |   |   |          |          |
| 3  | 1 UK | 2020-11 | 1 UK-Norther | 2 | 4 | 10.05556 | 2.376058 |
| 4  | 1 UK | 2020-11 | 1 UK-Norther | 2 | 5 | 6.583333 | 1.613673 |
| 5  | 1 UK | 2020-11 | 1 UK-Norther | 3 | 1 | 11.47878 | 2.526135 |
| 6  | 1 UK | 2020-11 | 1 UK-Norther | 3 | 2 | 13.6     | 5.129088 |
| 7  | 1 UK | 2020-11 | 1 UK-Norther | 3 | 3 | 12.125   | 3.361018 |
| 8  | 1 UK | 2020-11 | 1 UK-Norther | 3 | 4 | 10.9     | 3.339237 |
| 9  | 1 UK | 2020-11 | 1 UK-Norther | 3 | 5 | 4.090909 | 1.262737 |
| 10 | 1 UK | 2020-11 | 1 UK-Overall | 1 | 1 | 9.145352 | #####    |
| 11 | 1 UK | 2020-11 | 1 UK-Overall | 1 | 2 | 9.918542 | #####    |
| 12 | 1 UK | 2020-11 | 1 UK-Overall | 1 | 3 | 10.13241 | #####    |
| 13 | 1 UK | 2020-11 | 1 UK-Overall | 1 | 4 | 8.231845 | #####    |
| 14 | 1 UK | 2020-11 | 1 UK-Overall | 1 | 5 | 7.36919  | #####    |
| 15 | 1 UK | 2020-11 | 1 UK-Overall | 2 | 1 | 8.712109 | #####    |
| 16 | 1 UK | 2020-11 | 1 UK-Overall | 2 | 2 | 10.08074 | 1.023872 |
| 17 | 1 UK | 2020-11 | 1 UK-Overall | 2 | 3 | 9.363172 | #####    |
| 18 | 1 UK | 2020-11 | 1 UK-Overall | 2 | 4 | 8.19367  | #####    |
| 19 | 1 UK | 2020-11 | 1 UK-Overall | 2 | 5 | 6.828822 | #####    |
| 20 | 1 UK | 2020-11 | 1 UK-Overall | 3 | 1 | 9.474836 | #####    |
| 21 | 1 UK | 2020-11 | 1 UK-Overall | 3 | 2 | 9.828686 | 1.20129  |
| 22 | 1 UK | 2020-11 | 1 UK-Overall | 3 | 3 | 10.70255 | 1.272991 |
| 23 | 1 UK | 2020-11 | 1 UK-Overall | 3 | 4 | 8.267806 | #####    |
| 24 | 1 UK | 2020-11 | 1 UK-Overall | 3 | 5 | 7.889847 | #####    |
| 25 | 1 UK | 2020-11 | 1 UK-Scotlan | 1 | 1 | 8.770627 | #####    |
| 26 | 1 UK | 2020-11 | 1 UK-Scotlan | 1 | 2 | 8.32729  | 1.348331 |
| 27 | 1 UK | 2020-11 | 1 UK-Scotlan | 1 | 3 | 9.393794 | 1.13984  |
| 28 | 1 UK | 2020-11 | 1 UK-Scotlan | 1 | 4 | 9.451868 | #####    |
| 29 | 1 UK | 2020-11 | 1 UK-Scotlan | 1 | 5 | 7.617413 | 1.105606 |
| 30 | 1 UK | 2020-11 | 1 UK-Scotlan | 2 | 1 | 9.73077  | #####    |
| 31 | 1 UK | 2020-11 | 1 UK-Scotlan | 2 | 2 | 9.3      | 1.844169 |
| 32 | 1 UK | 2020-11 | 1 UK-Scotlan | 2 | 3 | 11.88636 | 1.537588 |
| 33 | 1 UK | 2020-11 | 1 UK-Scotlan | 2 | 4 | 10.29688 | 1.320874 |
| 34 | 1 UK | 2020-11 | 1 UK-Scotlan | 2 | 5 | 6.317073 | #####    |
| 35 | 1 UK | 2020-11 | 1 UK-Scotlan | 3 | 1 | 7.563819 | #####    |
| 36 | 1 UK | 2020-11 | 1 UK-Scotlan | 3 | 2 | 7.5      | 1.916796 |
| 37 | 1 UK | 2020-11 | 1 UK-Scotlan | 3 | 3 | 5.583333 | 1.11474  |
| 38 | 1 UK | 2020-11 | 1 UK-Scotlan | 3 | 4 | 8.178571 | 1.374098 |
| 39 | 1 UK | 2020-11 | 1 UK-Scotlan | 3 | 5 | 9.28     | 2.162752 |
| 40 | 1 UK | 2020-11 | 1 UK-Wales   | 1 | 1 | 9.308033 | #####    |
| 41 | 1 UK | 2020-11 | 1 UK-Wales   | 1 | 2 | 9.806706 | 2.16796  |
| 42 | 1 UK | 2020-11 | 1 UK-Wales   | 1 | 3 | 10.4494  | 1.409618 |
| 43 | 1 UK | 2020-11 | 1 UK-Wales   | 1 | 4 | 8.717484 | 1.312363 |
| 44 | 1 UK | 2020-11 | 1 UK-Wales   | 1 | 5 | 5.782678 | #####    |
| 45 | 1 UK | 2020-11 | 1 UK-Wales   | 2 | 1 | 8.349445 | #####    |
| 46 | 1 UK | 2020-11 | 1 UK-Wales   | 2 | 2 | 8.230769 | 1.584625 |
| 47 | 1 UK | 2020-11 | 1 UK-Wales   | 2 | 3 | 8.241379 | 1.364368 |
| 48 | 1 UK | 2020-11 | 1 UK-Wales   | 2 | 4 | 8.59375  | 1.747247 |
| 49 | 1 UK | 2020-11 | 1 UK-Wales   | 2 | 5 | 8.5      | 1.556156 |
| 50 | 1 UK | 2020-11 | 1 UK-Wales   | 3 | 1 | 9.855458 | 1.33481  |
| 51 | 1 UK | 2020-11 | 1 UK-Wales   | 3 | 2 | 10.75    | 3.306231 |
| 52 | 1 UK | 2020-11 | 1 UK-Wales   | 3 | 3 | 11.41667 | 1.918531 |
| 53 | 1 UK | 2020-11 | 1 UK-Wales   | 3 | 4 | 8.833333 | 1.944179 |
| 54 | 1 UK | 2020-11 | 1 UK-Wales   | 3 | 5 | 4.142857 | #####    |
| 55 | 1 UK | 2020-11 | 2 UK-Englan  | 1 | 1 | 2.365801 | #####    |
| 56 | 1 UK | 2020-11 | 2 UK-Englan  | 1 | 2 | 2.780714 | #####    |
| 57 | 1 UK | 2020-11 | 2 UK-Englan  | 1 | 3 | 2.314964 | #####    |
| 58 | 1 UK | 2020-11 | 2 UK-Englan  | 1 | 4 | 2.032751 | #####    |
| 59 | 1 UK | 2020-11 | 2 UK-Englan  | 1 |   |          |          |
| 60 | 1 UK | 2020-11 | 2 UK-Englan  | 1 |   |          |          |

|    |      |         |              |   |   |          |          |  |
|----|------|---------|--------------|---|---|----------|----------|--|
| 1  |      |         |              |   |   |          |          |  |
| 2  |      |         |              |   |   |          |          |  |
| 3  | 1 UK | 2020-11 | 2 UK-England | 1 | 5 | 2.260462 | #####    |  |
| 4  | 1 UK | 2020-11 | 2 UK-England | 2 | 1 | 2.307448 | #####    |  |
| 5  | 1 UK | 2020-11 | 2 UK-England | 2 | 2 | 2.714286 | #####    |  |
| 6  | 1 UK | 2020-11 | 2 UK-England | 2 | 3 | 2.240964 | #####    |  |
| 7  | 1 UK | 2020-11 | 2 UK-England | 2 | 4 | 2.380165 | #####    |  |
| 8  | 1 UK | 2020-11 | 2 UK-England | 2 | 5 | 1.831169 | #####    |  |
| 9  | 1 UK | 2020-11 | 2 UK-England | 3 | 1 | 2.409555 | #####    |  |
| 10 | 1 UK | 2020-11 | 2 UK-England | 3 | 2 | 2.818182 | #####    |  |
| 11 | 1 UK | 2020-11 | 2 UK-England | 3 | 3 | 2.372093 | #####    |  |
| 12 | 1 UK | 2020-11 | 2 UK-England | 3 | 4 | 1.736842 | #####    |  |
| 13 | 1 UK | 2020-11 | 2 UK-England | 3 | 5 | 2.656716 | #####    |  |
| 14 | 1 UK | 2020-11 | 2 UK-London  | 1 | 1 | 2.054724 | #####    |  |
| 15 | 1 UK | 2020-11 | 2 UK-London  | 1 | 2 | 3.09901  | #####    |  |
| 16 | 1 UK | 2020-11 | 2 UK-London  | 1 | 3 | 1.482445 | #####    |  |
| 17 | 1 UK | 2020-11 | 2 UK-London  | 1 | 4 | 2.097613 | #####    |  |
| 18 | 1 UK | 2020-11 | 2 UK-London  | 1 | 5 | 1.466235 | #####    |  |
| 19 | 1 UK | 2020-11 | 2 UK-London  | 2 | 1 | 2.184099 | #####    |  |
| 20 | 1 UK | 2020-11 | 2 UK-London  | 2 | 2 | 2.857143 | #####    |  |
| 21 | 1 UK | 2020-11 | 2 UK-London  | 2 | 3 | 1.583333 | #####    |  |
| 22 | 1 UK | 2020-11 | 2 UK-London  | 2 | 3 | 1.583333 | #####    |  |
| 23 | 1 UK | 2020-11 | 2 UK-London  | 2 | 4 | 2.4      | #####    |  |
| 24 | 1 UK | 2020-11 | 2 UK-London  | 2 | 5 | 1.9      | #####    |  |
| 25 | 1 UK | 2020-11 | 2 UK-London  | 3 | 1 | 1.968948 | #####    |  |
| 26 | 1 UK | 2020-11 | 2 UK-London  | 3 | 2 | 3.285714 | #####    |  |
| 27 | 1 UK | 2020-11 | 2 UK-London  | 3 | 3 | 1.428571 | #####    |  |
| 28 | 1 UK | 2020-11 | 2 UK-London  | 3 | 4 | 1.846154 | #####    |  |
| 29 | 1 UK | 2020-11 | 2 UK-London  | 3 | 5 | 1.166667 | #####    |  |
| 30 | 1 UK | 2020-11 | 2 UK-Norther | 1 | 1 | 3.560399 | #####    |  |
| 31 | 1 UK | 2020-11 | 2 UK-Norther | 1 | 2 | 4.174248 | #####    |  |
| 32 | 1 UK | 2020-11 | 2 UK-Norther | 1 | 3 | 3.810718 | #####    |  |
| 33 | 1 UK | 2020-11 | 2 UK-Norther | 1 | 4 | 2.508758 | #####    |  |
| 34 | 1 UK | 2020-11 | 2 UK-Norther | 1 | 5 | 2.339998 | #####    |  |
| 35 | 1 UK | 2020-11 | 2 UK-Norther | 2 | 1 | 3.284756 | #####    |  |
| 36 | 1 UK | 2020-11 | 2 UK-Norther | 2 | 2 | 3        | #####    |  |
| 37 | 1 UK | 2020-11 | 2 UK-Norther | 2 | 3 | 3.583333 | #####    |  |
| 38 | 1 UK | 2020-11 | 2 UK-Norther | 2 | 4 | 2.809524 | #####    |  |
| 39 | 1 UK | 2020-11 | 2 UK-Norther | 2 | 5 | 3.666667 | 1.016143 |  |
| 40 | 1 UK | 2020-11 | 2 UK-Norther | 3 | 1 | 3.744407 | #####    |  |
| 41 | 1 UK | 2020-11 | 2 UK-Norther | 3 | 2 | 4.727273 | 1.084073 |  |
| 42 | 1 UK | 2020-11 | 2 UK-Norther | 3 | 3 | 4        | #####    |  |
| 43 | 1 UK | 2020-11 | 2 UK-Norther | 3 | 4 | 2.25     | #####    |  |
| 44 | 1 UK | 2020-11 | 2 UK-Norther | 3 | 5 | 1.363636 | #####    |  |
| 45 | 1 UK | 2020-11 | 2 UK-Overall | 1 | 1 | 2.399472 | #####    |  |
| 46 | 1 UK | 2020-11 | 2 UK-Overall | 1 | 2 | 2.928517 | #####    |  |
| 47 | 1 UK | 2020-11 | 2 UK-Overall | 1 | 3 | 2.242356 | #####    |  |
| 48 | 1 UK | 2020-11 | 2 UK-Overall | 1 | 4 | 2.129399 | #####    |  |
| 49 | 1 UK | 2020-11 | 2 UK-Overall | 1 | 5 | 2.155263 | #####    |  |
| 50 | 1 UK | 2020-11 | 2 UK-Overall | 2 | 1 | 2.370191 | #####    |  |
| 51 | 1 UK | 2020-11 | 2 UK-Overall | 2 | 2 | 2.706348 | #####    |  |
| 52 | 1 UK | 2020-11 | 2 UK-Overall | 2 | 3 | 2.298102 | #####    |  |
| 53 | 1 UK | 2020-11 | 2 UK-Overall | 2 | 4 | 2.427649 | #####    |  |
| 54 | 1 UK | 2020-11 | 2 UK-Overall | 2 | 5 | 1.934152 | #####    |  |
| 55 | 1 UK | 2020-11 | 2 UK-Overall | 3 | 1 | 2.421113 | #####    |  |
| 56 | 1 UK | 2020-11 | 2 UK-Overall | 3 | 2 | 3.057709 | #####    |  |
| 57 | 1 UK | 2020-11 | 2 UK-Overall | 3 | 3 | 2.202329 | #####    |  |
| 58 | 1 UK | 2020-11 | 2 UK-Overall | 3 | 4 | 1.861085 | #####    |  |
| 59 | 1 UK | 2020-11 | 2 UK-Overall | 3 | 5 | 2.355546 | #####    |  |
| 60 | 1 UK | 2020-11 | 2 UK-Overall | 3 | 5 | 2.355546 | #####    |  |

1  
2  
3  
4  
5  
6  
7  
8  
9  
10  
11  
12  
13  
14  
15  
16  
17  
18  
19  
20  
21  
22  
23  
24  
25  
26  
27  
28  
29  
30  
31  
32  
33  
34  
35  
36  
37  
38  
39  
40  
41  
42  
43  
44  
45  
46  
47  
48  
49  
50  
51  
52  
53  
54  
55  
56  
57  
58  
59  
60

|      |         |              |   |   |          |          |
|------|---------|--------------|---|---|----------|----------|
| 1 UK | 2020-11 | 2 UK-Scotlan | 1 | 1 | 2.414028 | #####    |
| 1 UK | 2020-11 | 2 UK-Scotlan | 1 | 2 | 2.366559 | #####    |
| 1 UK | 2020-11 | 2 UK-Scotlan | 1 | 3 | 2.535465 | #####    |
| 1 UK | 2020-11 | 2 UK-Scotlan | 1 | 4 | 2.605574 | #####    |
| 1 UK | 2020-11 | 2 UK-Scotlan | 1 | 5 | 1.982921 | #####    |
| 1 UK | 2020-11 | 2 UK-Scotlan | 2 | 1 | 2.487495 | #####    |
| 1 UK | 2020-11 | 2 UK-Scotlan | 2 | 2 | 2        | #####    |
| 1 UK | 2020-11 | 2 UK-Scotlan | 2 | 3 | 3.055556 | #####    |
| 1 UK | 2020-11 | 2 UK-Scotlan | 2 | 4 | 2.679487 | #####    |
| 1 UK | 2020-11 | 2 UK-Scotlan | 2 | 5 | 1.790698 | #####    |
| 1 UK | 2020-11 | 2 UK-Scotlan | 3 | 1 | 2.340696 | #####    |
| 1 UK | 2020-11 | 2 UK-Scotlan | 3 | 2 | 2.571429 | #####    |
| 1 UK | 2020-11 | 2 UK-Scotlan | 3 | 3 | 1.95     | #####    |
| 1 UK | 2020-11 | 2 UK-Scotlan | 3 | 4 | 2.5      | #####    |
| 1 UK | 2020-11 | 2 UK-Scotlan | 3 | 5 | 2.230769 | #####    |
| 1 UK | 2020-11 | 2 UK-Wales   | 1 | 1 | 2.84225  | #####    |
| 1 UK | 2020-11 | 2 UK-Wales   | 1 | 2 | 3.635333 | #####    |
| 1 UK | 2020-11 | 2 UK-Wales   | 1 | 3 | 2.678628 | #####    |
| 1 UK | 2020-11 | 2 UK-Wales   | 1 | 4 | 2.243974 | #####    |
| 1 UK | 2020-11 | 2 UK-Wales   | 1 | 5 | 2.053095 | #####    |
| 1 UK | 2020-11 | 2 UK-Wales   | 2 | 1 | 2.726577 | #####    |
| 1 UK | 2020-11 | 2 UK-Wales   | 2 | 2 | 3.0625   | #####    |
| 1 UK | 2020-11 | 2 UK-Wales   | 2 | 3 | 2.702703 | #####    |
| 1 UK | 2020-11 | 2 UK-Wales   | 2 | 4 | 2.214286 | #####    |
| 1 UK | 2020-11 | 2 UK-Wales   | 2 | 5 | 2.85     | #####    |
| 1 UK | 2020-11 | 2 UK-Wales   | 3 | 1 | 2.906951 | #####    |
| 1 UK | 2020-11 | 2 UK-Wales   | 3 | 2 | 3.916667 | #####    |
| 1 UK | 2020-11 | 2 UK-Wales   | 3 | 3 | 2.666667 | #####    |
| 1 UK | 2020-11 | 2 UK-Wales   | 3 | 4 | 2.269231 | #####    |
| 1 UK | 2020-11 | 2 UK-Wales   | 3 | 5 | 1.565217 | #####    |
| 1 UK | 2020-11 | 3 UK-Englan  | 1 | 1 | #####    | #####    |
| 1 UK | 2020-11 | 3 UK-Englan  | 1 | 2 | 1.406488 | #####    |
| 1 UK | 2020-11 | 3 UK-Englan  | 1 | 3 | #####    | #####    |
| 1 UK | 2020-11 | 3 UK-Englan  | 1 | 4 | #####    | #####    |
| 1 UK | 2020-11 | 3 UK-Englan  | 1 | 5 | #####    | #####    |
| 1 UK | 2020-11 | 3 UK-Englan  | 2 | 1 | #####    | #####    |
| 1 UK | 2020-11 | 3 UK-Englan  | 2 | 2 | 0.425    | #####    |
| 1 UK | 2020-11 | 3 UK-Englan  | 2 | 3 | #####    | #####    |
| 1 UK | 2020-11 | 3 UK-Englan  | 2 | 4 | #####    | #####    |
| 1 UK | 2020-11 | 3 UK-Englan  | 2 | 5 | #####    | #####    |
| 1 UK | 2020-11 | 3 UK-Englan  | 3 | 1 | #####    | #####    |
| 1 UK | 2020-11 | 3 UK-Englan  | 3 | 2 | 1.967742 | #####    |
| 1 UK | 2020-11 | 3 UK-Englan  | 3 | 3 | 0        | 0        |
| 1 UK | 2020-11 | 3 UK-Englan  | 3 | 4 | #####    | #####    |
| 1 UK | 2020-11 | 3 UK-Englan  | 3 | 5 | #####    | #####    |
| 1 UK | 2020-11 | 3 UK-London  | 1 | 1 | #####    | #####    |
| 1 UK | 2020-11 | 3 UK-London  | 1 | 2 | 1.290279 | #####    |
| 1 UK | 2020-11 | 3 UK-London  | 1 | 3 | #####    | #####    |
| 1 UK | 2020-11 | 3 UK-London  | 1 | 4 | #####    | #####    |
| 1 UK | 2020-11 | 3 UK-London  | 1 | 5 | 0        | 0        |
| 1 UK | 2020-11 | 3 UK-London  | 2 | 1 | #####    | #####    |
| 1 UK | 2020-11 | 3 UK-London  | 2 | 2 | 2.157895 | 1.007693 |
| 1 UK | 2020-11 | 3 UK-London  | 2 | 3 | #####    | #####    |
| 1 UK | 2020-11 | 3 UK-London  | 2 | 4 | 0.08     | #####    |
| 1 UK | 2020-11 | 3 UK-London  | 2 | 5 | 0        | 0        |
| 1 UK | 2020-11 | 3 UK-London  | 3 | 1 | #####    | #####    |



|    |      |         |              |   |   |          |          |
|----|------|---------|--------------|---|---|----------|----------|
| 1  |      |         |              |   |   |          |          |
| 2  |      |         |              |   |   |          |          |
| 3  | 1 UK | 2020-11 | 3 UK-London  | 3 | 2 | #####    | #####    |
| 4  | 1 UK | 2020-11 | 3 UK-London  | 3 | 3 | #####    | #####    |
| 5  | 1 UK | 2020-11 | 3 UK-London  | 3 | 4 | 0.4      | #####    |
| 6  | 1 UK | 2020-11 | 3 UK-London  | 3 | 5 | 0        | 0        |
| 7  | 1 UK | 2020-11 | 3 UK-Norther | 1 | 1 | #####    | #####    |
| 8  | 1 UK | 2020-11 | 3 UK-Norther | 1 | 2 | 1.668668 | 1.239183 |
| 9  | 1 UK | 2020-11 | 3 UK-Norther | 1 | 3 | 0        | 0        |
| 10 | 1 UK | 2020-11 | 3 UK-Norther | 1 | 4 | #####    | #####    |
| 11 | 1 UK | 2020-11 | 3 UK-Norther | 1 | 5 | 0        | 0        |
| 12 | 1 UK | 2020-11 | 3 UK-Norther | 2 | 1 | 0        | 0        |
| 13 | 1 UK | 2020-11 | 3 UK-Norther | 2 | 2 | 0        | 0        |
| 14 | 1 UK | 2020-11 | 3 UK-Norther | 2 | 3 | 0        | 0        |
| 15 | 1 UK | 2020-11 | 3 UK-Norther | 2 | 4 | 0        | 0        |
| 16 | 1 UK | 2020-11 | 3 UK-Norther | 2 | 5 | 0        | 0        |
| 17 | 1 UK | 2020-11 | 3 UK-Norther | 3 | 1 | 1.071951 | #####    |
| 18 | 1 UK | 2020-11 | 3 UK-Norther | 3 | 2 | 2.454545 | 1.778612 |
| 19 | 1 UK | 2020-11 | 3 UK-Norther | 3 | 3 | 0        | 0        |
| 20 | 1 UK | 2020-11 | 3 UK-Norther | 3 | 4 | #####    | #####    |
| 21 | 1 UK | 2020-11 | 3 UK-Norther | 3 | 5 | 0        | 0        |
| 22 | 1 UK | 2020-11 | 3 UK-Overall | 1 | 1 | #####    | #####    |
| 23 | 1 UK | 2020-11 | 3 UK-Overall | 1 | 2 | 1.319773 | #####    |
| 24 | 1 UK | 2020-11 | 3 UK-Overall | 1 | 3 | #####    | #####    |
| 25 | 1 UK | 2020-11 | 3 UK-Overall | 1 | 4 | #####    | #####    |
| 26 | 1 UK | 2020-11 | 3 UK-Overall | 1 | 5 | #####    | #####    |
| 27 | 1 UK | 2020-11 | 3 UK-Overall | 2 | 1 | #####    | #####    |
| 28 | 1 UK | 2020-11 | 3 UK-Overall | 2 | 2 | #####    | #####    |
| 29 | 1 UK | 2020-11 | 3 UK-Overall | 2 | 3 | #####    | #####    |
| 30 | 1 UK | 2020-11 | 3 UK-Overall | 2 | 4 | #####    | #####    |
| 31 | 1 UK | 2020-11 | 3 UK-Overall | 2 | 5 | #####    | #####    |
| 32 | 1 UK | 2020-11 | 3 UK-Overall | 3 | 1 | #####    | #####    |
| 33 | 1 UK | 2020-11 | 3 UK-Overall | 3 | 2 | 1.582652 | #####    |
| 34 | 1 UK | 2020-11 | 3 UK-Overall | 3 | 3 | #####    | #####    |
| 35 | 1 UK | 2020-11 | 3 UK-Overall | 3 | 4 | #####    | #####    |
| 36 | 1 UK | 2020-11 | 3 UK-Overall | 3 | 5 | #####    | #####    |
| 37 | 1 UK | 2020-11 | 3 UK-Overall | 3 | 5 | #####    | #####    |
| 38 | 1 UK | 2020-11 | 3 UK-Scotlan | 1 | 1 | #####    | #####    |
| 39 | 1 UK | 2020-11 | 3 UK-Scotlan | 1 | 2 | 1.249033 | #####    |
| 40 | 1 UK | 2020-11 | 3 UK-Scotlan | 1 | 3 | #####    | #####    |
| 41 | 1 UK | 2020-11 | 3 UK-Scotlan | 1 | 4 | #####    | #####    |
| 42 | 1 UK | 2020-11 | 3 UK-Scotlan | 1 | 5 | #####    | #####    |
| 43 | 1 UK | 2020-11 | 3 UK-Scotlan | 2 | 1 | #####    | #####    |
| 44 | 1 UK | 2020-11 | 3 UK-Scotlan | 2 | 2 | 1.652174 | #####    |
| 45 | 1 UK | 2020-11 | 3 UK-Scotlan | 2 | 3 | #####    | #####    |
| 46 | 1 UK | 2020-11 | 3 UK-Scotlan | 2 | 4 | 0        | 0        |
| 47 | 1 UK | 2020-11 | 3 UK-Scotlan | 2 | 5 | #####    | #####    |
| 48 | 1 UK | 2020-11 | 3 UK-Scotlan | 3 | 1 | #####    | #####    |
| 49 | 1 UK | 2020-11 | 3 UK-Scotlan | 3 | 2 | 1        | #####    |
| 50 | 1 UK | 2020-11 | 3 UK-Scotlan | 3 | 3 | 0        | 0        |
| 51 | 1 UK | 2020-11 | 3 UK-Scotlan | 3 | 4 | #####    | #####    |
| 52 | 1 UK | 2020-11 | 3 UK-Scotlan | 3 | 5 | #####    | #####    |
| 53 | 1 UK | 2020-11 | 3 UK-Wales   | 1 | 1 | #####    | #####    |
| 54 | 1 UK | 2020-11 | 3 UK-Wales   | 1 | 2 | #####    | #####    |
| 55 | 1 UK | 2020-11 | 3 UK-Wales   | 1 | 3 | #####    | #####    |
| 56 | 1 UK | 2020-11 | 3 UK-Wales   | 1 | 4 | #####    | #####    |
| 57 | 1 UK | 2020-11 | 3 UK-Wales   | 1 | 5 | #####    | #####    |
| 58 | 1 UK | 2020-11 | 3 UK-Wales   | 2 | 1 | #####    | #####    |
| 59 | 1 UK | 2020-11 | 3 UK-Wales   | 2 | 2 | #####    | #####    |
| 60 | 1 UK | 2020-11 | 3 UK-Wales   | 2 | 2 | #####    | #####    |

1  
2  
3  
4  
5  
6  
7  
8  
9  
10  
11  
12  
13  
14  
15  
16  
17  
18  
19  
20  
21  
22  
23  
24  
25  
26  
27  
28  
29  
30  
31  
32  
33  
34  
35  
36  
37  
38  
39  
40  
41  
42  
43  
44  
45  
46  
47  
48  
49  
50  
51  
52  
53  
54  
55  
56  
57  
58  
59  
60

|      |         |              |   |   |          |          |
|------|---------|--------------|---|---|----------|----------|
| 1 UK | 2020-11 | 3 UK-Wales   | 2 | 3 | #####    | #####    |
| 1 UK | 2020-11 | 3 UK-Wales   | 2 | 4 | #####    | #####    |
| 1 UK | 2020-11 | 3 UK-Wales   | 2 | 5 | 0        | 0        |
| 1 UK | 2020-11 | 3 UK-Wales   | 3 | 1 | #####    | #####    |
| 1 UK | 2020-11 | 3 UK-Wales   | 3 | 2 | #####    | #####    |
| 1 UK | 2020-11 | 3 UK-Wales   | 3 | 3 | #####    | #####    |
| 1 UK | 2020-11 | 3 UK-Wales   | 3 | 4 | 0.32     | #####    |
| 1 UK | 2020-11 | 3 UK-Wales   | 3 | 5 | #####    | #####    |
| 1 UK | 2020-11 | 4 UK-England | 1 | 1 | 2.824332 | #####    |
| 1 UK | 2020-11 | 4 UK-England | 1 | 2 | 2.336509 | #####    |
| 1 UK | 2020-11 | 4 UK-England | 1 | 3 | 4.901934 | #####    |
| 1 UK | 2020-11 | 4 UK-England | 1 | 4 | 2.788113 | #####    |
| 1 UK | 2020-11 | 4 UK-England | 1 | 5 | #####    | #####    |
| 1 UK | 2020-11 | 4 UK-England | 2 | 1 | 2.602697 | #####    |
| 1 UK | 2020-11 | 4 UK-England | 2 | 2 | 3.382353 | 1.191177 |
| 1 UK | 2020-11 | 4 UK-England | 2 | 3 | 4.079365 | #####    |
| 1 UK | 2020-11 | 4 UK-England | 2 | 4 | 2.428571 | #####    |
| 1 UK | 2020-11 | 4 UK-England | 2 | 5 | #####    | #####    |
| 1 UK | 2020-11 | 4 UK-England | 3 | 1 | 2.982175 | #####    |
| 1 UK | 2020-11 | 4 UK-England | 3 | 2 | 1.793103 | #####    |
| 1 UK | 2020-11 | 4 UK-England | 3 | 3 | 5.447368 | 1.255377 |
| 1 UK | 2020-11 | 4 UK-England | 3 | 4 | 3.089552 | #####    |
| 1 UK | 2020-11 | 4 UK-England | 3 | 5 | 0.546875 | #####    |
| 1 UK | 2020-11 | 4 UK-London  | 1 | 1 | 3.30637  | #####    |
| 1 UK | 2020-11 | 4 UK-London  | 1 | 2 | 2.870702 | 1.455252 |
| 1 UK | 2020-11 | 4 UK-London  | 1 | 3 | 4.779142 | 1.470114 |
| 1 UK | 2020-11 | 4 UK-London  | 1 | 4 | 2.552761 | #####    |
| 1 UK | 2020-11 | 4 UK-London  | 1 | 5 | #####    | #####    |
| 1 UK | 2020-11 | 4 UK-London  | 2 | 1 | 1.809692 | #####    |
| 1 UK | 2020-11 | 4 UK-London  | 2 | 2 | 1.25     | #####    |
| 1 UK | 2020-11 | 4 UK-London  | 2 | 3 | 2.727273 | 1.130391 |
| 1 UK | 2020-11 | 4 UK-London  | 2 | 4 | 1.666667 | #####    |
| 1 UK | 2020-11 | 4 UK-London  | 2 | 5 | 0        | 0        |
| 1 UK | 2020-11 | 4 UK-London  | 3 | 1 | 4.477953 | 1.254547 |
| 1 UK | 2020-11 | 4 UK-London  | 3 | 2 | 4.153846 | 2.475719 |
| 1 UK | 2020-11 | 4 UK-London  | 3 | 3 | 6.285714 | 2.354981 |
| 1 UK | 2020-11 | 4 UK-London  | 3 | 4 | 3.428571 | 1.224497 |
| 1 UK | 2020-11 | 4 UK-London  | 3 | 5 | #####    | #####    |
| 1 UK | 2020-11 | 4 UK-Norther | 1 | 1 | 2.333533 | #####    |
| 1 UK | 2020-11 | 4 UK-Norther | 1 | 2 | 1.180922 | #####    |
| 1 UK | 2020-11 | 4 UK-Norther | 1 | 3 | 3.847623 | 1.327049 |
| 1 UK | 2020-11 | 4 UK-Norther | 1 | 4 | 3.847171 | 1.386623 |
| 1 UK | 2020-11 | 4 UK-Norther | 1 | 5 | #####    | #####    |
| 1 UK | 2020-11 | 4 UK-Norther | 2 | 1 | 2.456727 | #####    |
| 1 UK | 2020-11 | 4 UK-Norther | 2 | 2 | 1.6      | 1.43118  |
| 1 UK | 2020-11 | 4 UK-Norther | 2 | 3 | 3.333333 | 1.318601 |
| 1 UK | 2020-11 | 4 UK-Norther | 2 | 4 | 4.222222 | 1.634153 |
| 1 UK | 2020-11 | 4 UK-Norther | 2 | 5 | #####    | #####    |
| 1 UK | 2020-11 | 4 UK-Norther | 3 | 1 | 2.257594 | #####    |
| 1 UK | 2020-11 | 4 UK-Norther | 3 | 2 | 1        | #####    |
| 1 UK | 2020-11 | 4 UK-Norther | 3 | 3 | 4.222222 | 2.077518 |
| 1 UK | 2020-11 | 4 UK-Norther | 3 | 4 | 3.545455 | 2.125798 |
| 1 UK | 2020-11 | 4 UK-Norther | 3 | 5 | #####    | #####    |
| 1 UK | 2020-11 | 4 UK-Overall | 1 | 1 | 2.817515 | #####    |
| 1 UK | 2020-11 | 4 UK-Overall | 1 | 2 | 2.29611  | #####    |
| 1 UK | 2020-11 | 4 UK-Overall | 1 | 3 | 4.592833 | #####    |

|    |      |         |              |   |   |          |          |  |
|----|------|---------|--------------|---|---|----------|----------|--|
| 1  |      |         |              |   |   |          |          |  |
| 2  |      |         |              |   |   |          |          |  |
| 3  | 1 UK | 2020-11 | 4 UK-Overall | 1 | 4 | 2.785575 | #####    |  |
| 4  | 1 UK | 2020-11 | 4 UK-Overall | 1 | 5 | #####    | #####    |  |
| 5  | 1 UK | 2020-11 | 4 UK-Overall | 2 | 1 | 2.467964 | #####    |  |
| 6  | 1 UK | 2020-11 | 4 UK-Overall | 2 | 2 | 2.72677  | #####    |  |
| 7  | 1 UK | 2020-11 | 4 UK-Overall | 2 | 3 | 3.641707 | #####    |  |
| 8  | 1 UK | 2020-11 | 4 UK-Overall | 2 | 4 | 2.50776  | #####    |  |
| 9  | 1 UK | 2020-11 | 4 UK-Overall | 2 | 5 | #####    | #####    |  |
| 10 | 1 UK | 2020-11 | 4 UK-Overall | 3 | 1 | 3.075586 | #####    |  |
| 11 | 1 UK | 2020-11 | 4 UK-Overall | 3 | 2 | 2.047089 | #####    |  |
| 12 | 1 UK | 2020-11 | 4 UK-Overall | 3 | 3 | 5.245721 | #####    |  |
| 13 | 1 UK | 2020-11 | 4 UK-Overall | 3 | 4 | 3.039779 | #####    |  |
| 14 | 1 UK | 2020-11 | 4 UK-Overall | 3 | 5 | #####    | #####    |  |
| 15 | 1 UK | 2020-11 | 4 UK-Scotlan | 1 | 1 | 2.601182 | #####    |  |
| 16 | 1 UK | 2020-11 | 4 UK-Scotlan | 1 | 2 | 2.459539 | #####    |  |
| 17 | 1 UK | 2020-11 | 4 UK-Scotlan | 1 | 3 | 3.754928 | #####    |  |
| 18 | 1 UK | 2020-11 | 4 UK-Scotlan | 1 | 4 | 2.721235 | #####    |  |
| 19 | 1 UK | 2020-11 | 4 UK-Scotlan | 1 | 5 | #####    | #####    |  |
| 20 | 1 UK | 2020-11 | 4 UK-Scotlan | 2 | 1 | 2.811646 | #####    |  |
| 21 | 1 UK | 2020-11 | 4 UK-Scotlan | 2 | 2 | 2.6      | 1.364643 |  |
| 22 | 1 UK | 2020-11 | 4 UK-Scotlan | 2 | 3 | 3.977273 | 1.074997 |  |
| 23 | 1 UK | 2020-11 | 4 UK-Scotlan | 2 | 4 | 3.382353 | #####    |  |
| 24 | 1 UK | 2020-11 | 4 UK-Scotlan | 2 | 5 | #####    | #####    |  |
| 25 | 1 UK | 2020-11 | 4 UK-Scotlan | 3 | 1 | 2.365835 | #####    |  |
| 26 | 1 UK | 2020-11 | 4 UK-Scotlan | 3 | 2 | 2.357143 | 1.197898 |  |
| 27 | 1 UK | 2020-11 | 4 UK-Scotlan | 3 | 3 | 3.5      | 1.52848  |  |
| 28 | 1 UK | 2020-11 | 4 UK-Scotlan | 3 | 4 | 1.733333 | #####    |  |
| 29 | 1 UK | 2020-11 | 4 UK-Scotlan | 3 | 5 | 1.4      | 1.151077 |  |
| 30 | 1 UK | 2020-11 | 4 UK-Wales   | 1 | 1 | 2.228657 | #####    |  |
| 31 | 1 UK | 2020-11 | 4 UK-Wales   | 1 | 2 | 1.334329 | #####    |  |
| 32 | 1 UK | 2020-11 | 4 UK-Wales   | 1 | 3 | 3.269335 | #####    |  |
| 33 | 1 UK | 2020-11 | 4 UK-Wales   | 1 | 4 | 3.035128 | #####    |  |
| 34 | 1 UK | 2020-11 | 4 UK-Wales   | 1 | 5 | #####    | #####    |  |
| 35 | 1 UK | 2020-11 | 4 UK-Wales   | 2 | 1 | 2.205185 | #####    |  |
| 36 | 1 UK | 2020-11 | 4 UK-Wales   | 2 | 2 | 2.75     | 1.367972 |  |
| 37 | 1 UK | 2020-11 | 4 UK-Wales   | 2 | 3 | 2.225806 | #####    |  |
| 38 | 1 UK | 2020-11 | 4 UK-Wales   | 2 | 4 | 2.852941 | #####    |  |
| 39 | 1 UK | 2020-11 | 4 UK-Wales   | 2 | 5 | 0.1      | #####    |  |
| 40 | 1 UK | 2020-11 | 4 UK-Wales   | 3 | 1 | 2.24169  | #####    |  |
| 41 | 1 UK | 2020-11 | 4 UK-Wales   | 3 | 2 | 0.5      | #####    |  |
| 42 | 1 UK | 2020-11 | 4 UK-Wales   | 3 | 3 | 3.703704 | 1.039505 |  |
| 43 | 1 UK | 2020-11 | 4 UK-Wales   | 3 | 4 | 3.190476 | 1.421696 |  |
| 44 | 1 UK | 2020-11 | 4 UK-Wales   | 3 | 5 | #####    | #####    |  |
| 45 | 1 UK | 2020-11 | 5 UK-Englan  | 1 | 1 | 4.027561 | #####    |  |
| 46 | 1 UK | 2020-11 | 5 UK-Englan  | 1 | 2 | 4.020474 | #####    |  |
| 47 | 1 UK | 2020-11 | 5 UK-Englan  | 1 | 3 | 3.723804 | #####    |  |
| 48 | 1 UK | 2020-11 | 5 UK-Englan  | 1 | 4 | 3.46928  | #####    |  |
| 49 | 1 UK | 2020-11 | 5 UK-Englan  | 1 | 5 | 5.311243 | #####    |  |
| 50 | 1 UK | 2020-11 | 5 UK-Englan  | 2 | 1 | 3.925623 | #####    |  |
| 51 | 1 UK | 2020-11 | 5 UK-Englan  | 2 | 2 | 4.45     | 1.016773 |  |
| 52 | 1 UK | 2020-11 | 5 UK-Englan  | 2 | 3 | 2.684211 | #####    |  |
| 53 | 1 UK | 2020-11 | 5 UK-Englan  | 2 | 4 | 4.137615 | #####    |  |
| 54 | 1 UK | 2020-11 | 5 UK-Englan  | 2 | 5 | 4.934211 | #####    |  |
| 55 | 1 UK | 2020-11 | 5 UK-Englan  | 3 | 1 | 4.105112 | #####    |  |
| 56 | 1 UK | 2020-11 | 5 UK-Englan  | 3 | 2 | 3.766667 | #####    |  |
| 57 | 1 UK | 2020-11 | 5 UK-Englan  | 3 | 3 | 4.47619  | #####    |  |
| 58 | 1 UK | 2020-11 | 5 UK-Englan  | 3 | 4 | 2.878788 | #####    |  |
| 59 | 1 UK | 2020-11 | 5 UK-Englan  | 3 |   |          |          |  |
| 60 | 1 UK | 2020-11 | 5 UK-Englan  | 3 |   |          |          |  |

|    |      |         |              |   |   |          |          |  |
|----|------|---------|--------------|---|---|----------|----------|--|
| 1  |      |         |              |   |   |          |          |  |
| 2  |      |         |              |   |   |          |          |  |
| 3  | 1 UK | 2020-11 | 5 UK-England | 3 | 5 | 5.688525 | #####    |  |
| 4  | 1 UK | 2020-11 | 5 UK-London  | 1 | 1 | 3.444627 | #####    |  |
| 5  | 1 UK | 2020-11 | 5 UK-London  | 1 | 2 | 2.710548 | 1.009744 |  |
| 6  | 1 UK | 2020-11 | 5 UK-London  | 1 | 3 | 3.402978 | #####    |  |
| 7  | 1 UK | 2020-11 | 5 UK-London  | 1 | 4 | 4.05251  | #####    |  |
| 8  | 1 UK | 2020-11 | 5 UK-London  | 1 | 5 | 4.398057 | 1.110067 |  |
| 9  | 1 UK | 2020-11 | 5 UK-London  | 2 | 1 | 3.093817 | #####    |  |
| 10 | 1 UK | 2020-11 | 5 UK-London  | 2 | 2 | 2.375    | #####    |  |
| 11 | 1 UK | 2020-11 | 5 UK-London  | 2 | 3 | 3.142857 | 1.035246 |  |
| 12 | 1 UK | 2020-11 | 5 UK-London  | 2 | 4 | 3.291667 | #####    |  |
| 13 | 1 UK | 2020-11 | 5 UK-London  | 2 | 5 | 4.555556 | 1.397721 |  |
| 14 | 1 UK | 2020-11 | 5 UK-London  | 3 | 1 | 3.679879 | #####    |  |
| 15 | 1 UK | 2020-11 | 5 UK-London  | 3 | 2 | 2.923077 | 1.574538 |  |
| 16 | 1 UK | 2020-11 | 5 UK-London  | 3 | 3 | 3.5625   | #####    |  |
| 17 | 1 UK | 2020-11 | 5 UK-London  | 3 | 4 | 4.73913  | 1.346117 |  |
| 18 | 1 UK | 2020-11 | 5 UK-London  | 3 | 5 | 4.307692 | 1.551529 |  |
| 19 | 1 UK | 2020-11 | 5 UK-Norther | 1 | 1 | 4.075185 | #####    |  |
| 20 | 1 UK | 2020-11 | 5 UK-Norther | 1 | 2 | 4.940757 | 1.659259 |  |
| 21 | 1 UK | 2020-11 | 5 UK-Norther | 1 | 3 | 3.916015 | 1.247504 |  |
| 22 | 1 UK | 2020-11 | 5 UK-Norther | 1 | 4 | 3.55956  | 1.032977 |  |
| 23 | 1 UK | 2020-11 | 5 UK-Norther | 1 | 5 | 2.6675   | #####    |  |
| 24 | 1 UK | 2020-11 | 5 UK-Norther | 2 | 1 | 3.407013 | #####    |  |
| 25 | 1 UK | 2020-11 | 5 UK-Norther | 2 | 2 | 3.4      | 1.186672 |  |
| 26 | 1 UK | 2020-11 | 5 UK-Norther | 2 | 3 | 3.818182 | #####    |  |
| 27 | 1 UK | 2020-11 | 5 UK-Norther | 2 | 4 | 3.047619 | 1.070127 |  |
| 28 | 1 UK | 2020-11 | 5 UK-Norther | 2 | 5 | 2.833333 | #####    |  |
| 29 | 1 UK | 2020-11 | 5 UK-Norther | 3 | 1 | 4.498778 | 1.22266  |  |
| 30 | 1 UK | 2020-11 | 5 UK-Norther | 3 | 2 | 5.545455 | 2.239409 |  |
| 31 | 1 UK | 2020-11 | 5 UK-Norther | 3 | 3 | 4        | 2.179596 |  |
| 32 | 1 UK | 2020-11 | 5 UK-Norther | 3 | 4 | 4        | 1.679233 |  |
| 33 | 1 UK | 2020-11 | 5 UK-Norther | 3 | 5 | 2.545455 | 1.294472 |  |
| 34 | 1 UK | 2020-11 | 5 UK-Overall | 1 | 1 | 3.953288 | #####    |  |
| 35 | 1 UK | 2020-11 | 5 UK-Overall | 1 | 2 | 3.868669 | #####    |  |
| 36 | 1 UK | 2020-11 | 5 UK-Overall | 1 | 3 | 3.755001 | #####    |  |
| 37 | 1 UK | 2020-11 | 5 UK-Overall | 1 | 4 | 3.670943 | #####    |  |
| 38 | 1 UK | 2020-11 | 5 UK-Overall | 1 | 5 | 4.912906 | #####    |  |
| 39 | 1 UK | 2020-11 | 5 UK-Overall | 2 | 1 | 3.784261 | #####    |  |
| 40 | 1 UK | 2020-11 | 5 UK-Overall | 2 | 2 | 3.851712 | #####    |  |
| 41 | 1 UK | 2020-11 | 5 UK-Overall | 2 | 3 | 3.032888 | #####    |  |
| 42 | 1 UK | 2020-11 | 5 UK-Overall | 2 | 4 | 4.007668 | #####    |  |
| 43 | 1 UK | 2020-11 | 5 UK-Overall | 2 | 5 | 4.739453 | #####    |  |
| 44 | 1 UK | 2020-11 | 5 UK-Overall | 3 | 1 | 4.08184  | #####    |  |
| 45 | 1 UK | 2020-11 | 5 UK-Overall | 3 | 2 | 3.878719 | #####    |  |
| 46 | 1 UK | 2020-11 | 5 UK-Overall | 3 | 3 | 4.281178 | #####    |  |
| 47 | 1 UK | 2020-11 | 5 UK-Overall | 3 | 4 | 3.35227  | #####    |  |
| 48 | 1 UK | 2020-11 | 5 UK-Overall | 3 | 5 | 5.075311 | #####    |  |
| 49 | 1 UK | 2020-11 | 5 UK-Scotlan | 1 | 1 | 4.055079 | #####    |  |
| 50 | 1 UK | 2020-11 | 5 UK-Scotlan | 1 | 2 | 3.419015 | #####    |  |
| 51 | 1 UK | 2020-11 | 5 UK-Scotlan | 1 | 3 | 4.512621 | #####    |  |
| 52 | 1 UK | 2020-11 | 5 UK-Scotlan | 1 | 4 | 4.044557 | #####    |  |
| 53 | 1 UK | 2020-11 | 5 UK-Scotlan | 1 | 5 | 4.406156 | #####    |  |
| 54 | 1 UK | 2020-11 | 5 UK-Scotlan | 2 | 1 | 3.949534 | #####    |  |
| 55 | 1 UK | 2020-11 | 5 UK-Scotlan | 2 | 2 | 3.173913 | #####    |  |
| 56 | 1 UK | 2020-11 | 5 UK-Scotlan | 2 | 3 | 4.45098  | #####    |  |
| 57 | 1 UK | 2020-11 | 5 UK-Scotlan | 2 | 4 | 4.09589  | #####    |  |
| 58 | 1 UK | 2020-11 | 5 UK-Scotlan | 2 | 5 | 3.829268 | #####    |  |
| 59 | 1 UK | 2020-11 | 5 UK-Scotlan | 2 |   |          |          |  |
| 60 | 1 UK | 2020-11 | 5 UK-Scotlan | 2 |   |          |          |  |

|    |      |         |              |   |   |          |          |  |
|----|------|---------|--------------|---|---|----------|----------|--|
| 1  |      |         |              |   |   |          |          |  |
| 2  |      |         |              |   |   |          |          |  |
| 3  | 1 UK | 2020-11 | 5 UK-Scotlan | 3 | 1 | 4.174464 | #####    |  |
| 4  | 1 UK | 2020-11 | 5 UK-Scotlan | 3 | 2 | 3.588235 | #####    |  |
| 5  | 1 UK | 2020-11 | 5 UK-Scotlan | 3 | 3 | 4.6      | 1.394687 |  |
| 6  | 1 UK | 2020-11 | 5 UK-Scotlan | 3 | 4 | 3.969697 | #####    |  |
| 7  | 1 UK | 2020-11 | 5 UK-Scotlan | 3 | 5 | 5.115385 | 1.151777 |  |
| 8  | 1 UK | 2020-11 | 5 UK-Wales   | 1 | 1 | 4.193725 | #####    |  |
| 9  | 1 UK | 2020-11 | 5 UK-Wales   | 1 | 2 | 4.817969 | 1.789743 |  |
| 10 | 1 UK | 2020-11 | 5 UK-Wales   | 1 | 3 | 4.000996 | #####    |  |
| 11 | 1 UK | 2020-11 | 5 UK-Wales   | 1 | 4 | 4.420614 | #####    |  |
| 12 | 1 UK | 2020-11 | 5 UK-Wales   | 1 | 5 | 3.09236  | #####    |  |
| 13 | 1 UK | 2020-11 | 5 UK-Wales   | 2 | 1 | 3.813249 | #####    |  |
| 14 | 1 UK | 2020-11 | 5 UK-Wales   | 2 | 2 | 3.142857 | 1.380928 |  |
| 15 | 1 UK | 2020-11 | 5 UK-Wales   | 2 | 3 | 3.029412 | #####    |  |
| 16 | 1 UK | 2020-11 | 5 UK-Wales   | 2 | 4 | 4.725    | #####    |  |
| 17 | 1 UK | 2020-11 | 5 UK-Wales   | 2 | 5 | 5.777778 | 1.550802 |  |
| 18 | 1 UK | 2020-11 | 5 UK-Wales   | 3 | 1 | 4.426508 | 1.000733 |  |
| 19 | 1 UK | 2020-11 | 5 UK-Wales   | 3 | 2 | 5.777778 | 2.670445 |  |
| 20 | 1 UK | 2020-11 | 5 UK-Wales   | 3 | 3 | 4.5      | 1.216292 |  |
| 21 | 1 UK | 2020-11 | 5 UK-Wales   | 3 | 4 | 4.1      | 1.102118 |  |
| 22 | 1 UK | 2020-11 | 5 UK-Wales   | 3 | 5 | 1.545455 | #####    |  |
| 23 | 1 UK | 2020-12 | 1 UK-Englan  | 1 | 1 | 8.491454 | #####    |  |
| 24 | 1 UK | 2020-12 | 1 UK-Englan  | 1 | 2 | 8.835075 | 1.888273 |  |
| 25 | 1 UK | 2020-12 | 1 UK-Englan  | 1 | 3 | 8.372153 | 1.331661 |  |
| 26 | 1 UK | 2020-12 | 1 UK-Englan  | 1 | 4 | 10.23288 | 2.074278 |  |
| 27 | 1 UK | 2020-12 | 1 UK-Englan  | 1 | 5 | 6.206317 | 1.06996  |  |
| 28 | 1 UK | 2020-12 | 1 UK-Englan  | 2 | 1 | 6.717241 | #####    |  |
| 29 | 1 UK | 2020-12 | 1 UK-Englan  | 2 | 2 | 7.9      | 3.163914 |  |
| 30 | 1 UK | 2020-12 | 1 UK-Englan  | 2 | 3 | 7.037037 | 1.190441 |  |
| 31 | 1 UK | 2020-12 | 1 UK-Englan  | 2 | 4 | 9.095238 | 2.013588 |  |
| 32 | 1 UK | 2020-12 | 1 UK-Englan  | 2 | 5 | 3.173913 | #####    |  |
| 33 | 1 UK | 2020-12 | 1 UK-Englan  | 3 | 1 | 9.381665 | 1.162142 |  |
| 34 | 1 UK | 2020-12 | 1 UK-Englan  | 3 | 2 | 9.153846 | 2.286844 |  |
| 35 | 1 UK | 2020-12 | 1 UK-Englan  | 3 | 3 | 9.333333 | 2.101288 |  |
| 36 | 1 UK | 2020-12 | 1 UK-Englan  | 3 | 4 | 10.64516 | 2.727678 |  |
| 37 | 1 UK | 2020-12 | 1 UK-Englan  | 3 | 5 | 8.137931 | 1.616555 |  |
| 38 | 1 UK | 2020-12 | 1 UK-London  | 1 | 1 | 6.32353  | 1.572517 |  |
| 39 | 1 UK | 2020-12 | 1 UK-London  | 1 | 2 | 6.723648 | 2.004457 |  |
| 40 | 1 UK | 2020-12 | 1 UK-London  | 1 | 3 | 7.401173 | 2.990194 |  |
| 41 | 1 UK | 2020-12 | 1 UK-London  | 1 | 4 | 5.158354 | 1.062947 |  |
| 42 | 1 UK | 2020-12 | 1 UK-London  | 1 | 5 | 2.804626 | #####    |  |
| 43 | 1 UK | 2020-12 | 1 UK-London  | 2 | 1 | 7.253425 | 1.219336 |  |
| 44 | 1 UK | 2020-12 | 1 UK-London  | 2 | 2 | 8.714286 | 3.015229 |  |
| 45 | 1 UK | 2020-12 | 1 UK-London  | 2 | 3 | 7.909091 | 1.917663 |  |
| 46 | 1 UK | 2020-12 | 1 UK-London  | 2 | 4 | 7        | 1.581245 |  |
| 47 | 1 UK | 2020-12 | 1 UK-London  | 2 | 5 | 2.166667 | #####    |  |
| 48 | 1 UK | 2020-12 | 1 UK-London  | 3 | 1 | 5.670366 | 2.53452  |  |
| 49 | 1 UK | 2020-12 | 1 UK-London  | 3 | 2 | 4.333333 | 1.905287 |  |
| 50 | 1 UK | 2020-12 | 1 UK-London  | 3 | 3 | 7.111111 | 4.56654  |  |
| 51 | 1 UK | 2020-12 | 1 UK-London  | 3 | 4 | 4        | 1.311198 |  |
| 52 | 1 UK | 2020-12 | 1 UK-London  | 3 | 5 | 3.333333 | 1.484588 |  |
| 53 | 1 UK | 2020-12 | 1 UK-Norther | 1 | 1 | 10.50045 | 1.77356  |  |
| 54 | 1 UK | 2020-12 | 1 UK-Norther | 1 | 2 | 10.65907 | 3.50724  |  |
| 55 | 1 UK | 2020-12 | 1 UK-Norther | 1 | 3 | 11.61143 | 2.36572  |  |
| 56 | 1 UK | 2020-12 | 1 UK-Norther | 1 | 4 | 10.832   | 4.314201 |  |
| 57 | 1 UK | 2020-12 | 1 UK-Norther | 1 | 5 | 2.338594 | 1.075805 |  |
| 58 | 1 UK | 2020-12 | 1 UK-Norther | 2 | 1 | 6.50934  | 1.166861 |  |

|    |      |         |              |   |   |          |          |  |
|----|------|---------|--------------|---|---|----------|----------|--|
| 1  |      |         |              |   |   |          |          |  |
| 2  |      |         |              |   |   |          |          |  |
| 3  | 1 UK | 2020-12 | 1 UK-Norther | 2 | 2 | 6        | 0        |  |
| 4  | 1 UK | 2020-12 | 1 UK-Norther | 2 | 3 | 6.333333 | 3.53839  |  |
| 5  | 1 UK | 2020-12 | 1 UK-Norther | 2 | 4 | 8.272727 | 1.894403 |  |
| 6  | 1 UK | 2020-12 | 1 UK-Norther | 2 | 5 | 3        | 1.414309 |  |
| 7  | 1 UK | 2020-12 | 1 UK-Norther | 3 | 1 | 12.17687 | 2.351386 |  |
| 8  | 1 UK | 2020-12 | 1 UK-Norther | 3 | 2 | 12       | 4.242927 |  |
| 9  | 1 UK | 2020-12 | 1 UK-Norther | 3 | 3 | 12.6     | 2.632287 |  |
| 10 | 1 UK | 2020-12 | 1 UK-Norther | 3 | 4 | 13.6     | 8.614987 |  |
| 11 | 1 UK | 2020-12 | 1 UK-Norther | 3 | 5 | 1        | 0        |  |
| 12 | 1 UK | 2020-12 | 1 UK-Overall | 1 | 1 | 7.93968  | #####    |  |
| 13 | 1 UK | 2020-12 | 1 UK-Overall | 1 | 2 | 8.734814 | 1.417132 |  |
| 14 | 1 UK | 2020-12 | 1 UK-Overall | 1 | 3 | 7.985175 | 1.104955 |  |
| 15 | 1 UK | 2020-12 | 1 UK-Overall | 1 | 4 | 8.984338 | 1.326239 |  |
| 16 | 1 UK | 2020-12 | 1 UK-Overall | 1 | 5 | 5.267308 | #####    |  |
| 17 | 1 UK | 2020-12 | 1 UK-Overall | 2 | 1 | 6.958491 | #####    |  |
| 18 | 1 UK | 2020-12 | 1 UK-Overall | 2 | 2 | 8.380102 | 1.990789 |  |
| 19 | 1 UK | 2020-12 | 1 UK-Overall | 2 | 3 | 7.316711 | #####    |  |
| 20 | 1 UK | 2020-12 | 1 UK-Overall | 2 | 4 | 8.339199 | 1.104358 |  |
| 21 | 1 UK | 2020-12 | 1 UK-Overall | 2 | 5 | 3.095745 | #####    |  |
| 22 | 1 UK | 2020-12 | 1 UK-Overall | 3 | 1 | 8.49864  | #####    |  |
| 23 | 1 UK | 2020-12 | 1 UK-Overall | 3 | 2 | 8.897624 | 1.85346  |  |
| 24 | 1 UK | 2020-12 | 1 UK-Overall | 3 | 3 | 8.413984 | 1.720464 |  |
| 25 | 1 UK | 2020-12 | 1 UK-Overall | 3 | 4 | 9.311656 | 1.916932 |  |
| 26 | 1 UK | 2020-12 | 1 UK-Overall | 3 | 5 | 6.777076 | 1.257344 |  |
| 27 | 1 UK | 2020-12 | 1 UK-Scotlan | 1 | 1 | 7.325997 | 1.008739 |  |
| 28 | 1 UK | 2020-12 | 1 UK-Scotlan | 1 | 2 | 10.57979 | 3.509907 |  |
| 29 | 1 UK | 2020-12 | 1 UK-Scotlan | 1 | 3 | 6.654288 | 1.206641 |  |
| 30 | 1 UK | 2020-12 | 1 UK-Scotlan | 1 | 4 | 7.805789 | 1.413339 |  |
| 31 | 1 UK | 2020-12 | 1 UK-Scotlan | 1 | 5 | 3.102399 | #####    |  |
| 32 | 1 UK | 2020-12 | 1 UK-Scotlan | 2 | 1 | 9.076193 | 1.1127   |  |
| 33 | 1 UK | 2020-12 | 1 UK-Scotlan | 2 | 2 | 12       | 2.345366 |  |
| 34 | 1 UK | 2020-12 | 1 UK-Scotlan | 2 | 3 | 8.5      | 1.707488 |  |
| 35 | 1 UK | 2020-12 | 1 UK-Scotlan | 2 | 4 | 10.45    | 2.255673 |  |
| 36 | 1 UK | 2020-12 | 1 UK-Scotlan | 2 | 5 | 4.5      | 1.489647 |  |
| 37 | 1 UK | 2020-12 | 1 UK-Scotlan | 3 | 1 | 6.095817 | 1.520698 |  |
| 38 | 1 UK | 2020-12 | 1 UK-Scotlan | 3 | 2 | 10       | 4.833544 |  |
| 39 | 1 UK | 2020-12 | 1 UK-Scotlan | 3 | 3 | 5.5      | 1.58782  |  |
| 40 | 1 UK | 2020-12 | 1 UK-Scotlan | 3 | 4 | 4.636364 | #####    |  |
| 41 | 1 UK | 2020-12 | 1 UK-Scotlan | 3 | 5 | 1.857143 | #####    |  |
| 42 | 1 UK | 2020-12 | 1 UK-Wales   | 1 | 1 | 6.217194 | 1.002025 |  |
| 43 | 1 UK | 2020-12 | 1 UK-Wales   | 1 | 2 | 8.5      | 1.952694 |  |
| 44 | 1 UK | 2020-12 | 1 UK-Wales   | 1 | 3 | 5.887066 | 3.145981 |  |
| 45 | 1 UK | 2020-12 | 1 UK-Wales   | 1 | 4 | 8.032622 | 1.49871  |  |
| 46 | 1 UK | 2020-12 | 1 UK-Wales   | 1 | 5 | 2.711903 | #####    |  |
| 47 | 1 UK | 2020-12 | 1 UK-Wales   | 2 | 1 | 4.990884 | #####    |  |
| 48 | 1 UK | 2020-12 | 1 UK-Wales   | 2 | 2 | 8.5      | 1.952694 |  |
| 49 | 1 UK | 2020-12 | 1 UK-Wales   | 2 | 3 | 4.571429 | #####    |  |
| 50 | 1 UK | 2020-12 | 1 UK-Wales   | 2 | 4 | 4.363636 | #####    |  |
| 51 | 1 UK | 2020-12 | 1 UK-Wales   | 2 | 5 | 2.727273 | #####    |  |
| 52 | 1 UK | 2020-12 | 1 UK-Wales   | 3 | 1 | 7.478585 | 1.887824 |  |
| 53 | 1 UK | 2020-12 | 1 UK-Wales   | 3 | 3 | 7        | 5.715861 |  |
| 54 | 1 UK | 2020-12 | 1 UK-Wales   | 3 | 4 | 10.86667 | 2.418366 |  |
| 55 | 1 UK | 2020-12 | 1 UK-Wales   | 3 | 5 | 2.7      | #####    |  |
| 56 | 1 UK | 2020-12 | 2 UK-Englan  | 1 | 1 | 2.612724 | #####    |  |
| 57 | 1 UK | 2020-12 | 2 UK-Englan  | 1 | 2 | 2.840004 | #####    |  |
| 58 | 1 UK | 2020-12 | 2 UK-Englan  | 1 | 3 | 2.635137 | #####    |  |
| 59 | 1 UK | 2020-12 | 2 UK-Englan  | 1 |   |          |          |  |
| 60 | 1 UK | 2020-12 | 2 UK-Englan  | 1 |   |          |          |  |

|    |      |         |              |   |   |          |          |  |
|----|------|---------|--------------|---|---|----------|----------|--|
| 1  |      |         |              |   |   |          |          |  |
| 2  |      |         |              |   |   |          |          |  |
| 3  | 1 UK | 2020-12 | 2 UK-England | 1 | 4 | 3.17618  | #####    |  |
| 4  | 1 UK | 2020-12 | 2 UK-England | 1 | 5 | 1.511663 | #####    |  |
| 5  | 1 UK | 2020-12 | 2 UK-England | 2 | 1 | 2.039858 | #####    |  |
| 6  | 1 UK | 2020-12 | 2 UK-England | 2 | 2 | 1.666667 | #####    |  |
| 7  | 1 UK | 2020-12 | 2 UK-England | 2 | 3 | 2.586207 | #####    |  |
| 8  | 1 UK | 2020-12 | 2 UK-England | 2 | 4 | 2.391304 | #####    |  |
| 9  | 1 UK | 2020-12 | 2 UK-England | 2 | 5 | 1.166667 | #####    |  |
| 10 | 1 UK | 2020-12 | 2 UK-England | 3 | 1 | 2.893564 | #####    |  |
| 11 | 1 UK | 2020-12 | 2 UK-England | 3 | 2 | 3.285714 | #####    |  |
| 12 | 1 UK | 2020-12 | 2 UK-England | 3 | 3 | 2.666667 | #####    |  |
| 13 | 1 UK | 2020-12 | 2 UK-England | 3 | 4 | 3.444444 | #####    |  |
| 14 | 1 UK | 2020-12 | 2 UK-England | 3 | 5 | 1.733333 | #####    |  |
| 15 | 1 UK | 2020-12 | 2 UK-London  | 1 | 1 | 1.913802 | #####    |  |
| 16 | 1 UK | 2020-12 | 2 UK-London  | 1 | 2 | 3.127693 | #####    |  |
| 17 | 1 UK | 2020-12 | 2 UK-London  | 1 | 3 | 1.716319 | #####    |  |
| 18 | 1 UK | 2020-12 | 2 UK-London  | 1 | 4 | 2.00228  | #####    |  |
| 19 | 1 UK | 2020-12 | 2 UK-London  | 1 | 5 | #####    | #####    |  |
| 20 | 1 UK | 2020-12 | 2 UK-London  | 2 | 1 | 2.439287 | #####    |  |
| 21 | 1 UK | 2020-12 | 2 UK-London  | 2 | 2 | 2.714286 | #####    |  |
| 22 | 1 UK | 2020-12 | 2 UK-London  | 2 | 3 | 2.615385 | #####    |  |
| 23 | 1 UK | 2020-12 | 2 UK-London  | 2 | 4 | 2.7      | #####    |  |
| 24 | 1 UK | 2020-12 | 2 UK-London  | 2 | 5 | #####    | #####    |  |
| 25 | 1 UK | 2020-12 | 2 UK-London  | 3 | 1 | 1.640192 | #####    |  |
| 26 | 1 UK | 2020-12 | 2 UK-London  | 3 | 2 | 3.5      | #####    |  |
| 27 | 1 UK | 2020-12 | 2 UK-London  | 3 | 3 | 1.375    | #####    |  |
| 28 | 1 UK | 2020-12 | 2 UK-London  | 3 | 4 | 1.6      | #####    |  |
| 29 | 1 UK | 2020-12 | 2 UK-London  | 3 | 5 | #####    | #####    |  |
| 30 | 1 UK | 2020-12 | 2 UK-Norther | 1 | 1 | 3.418264 | #####    |  |
| 31 | 1 UK | 2020-12 | 2 UK-Norther | 1 | 2 | 2.741163 | #####    |  |
| 32 | 1 UK | 2020-12 | 2 UK-Norther | 1 | 3 | 3.568631 | #####    |  |
| 33 | 1 UK | 2020-12 | 2 UK-Norther | 1 | 4 | 4.464976 | 1.451854 |  |
| 34 | 1 UK | 2020-12 | 2 UK-Norther | 1 | 5 | 1.561693 | #####    |  |
| 35 | 1 UK | 2020-12 | 2 UK-Norther | 2 | 1 | 3.138067 | #####    |  |
| 36 | 1 UK | 2020-12 | 2 UK-Norther | 2 | 2 | 3        | 0        |  |
| 37 | 1 UK | 2020-12 | 2 UK-Norther | 2 | 3 | 2.333333 | #####    |  |
| 38 | 1 UK | 2020-12 | 2 UK-Norther | 2 | 4 | 3.785714 | #####    |  |
| 39 | 1 UK | 2020-12 | 2 UK-Norther | 2 | 5 | 2.333333 | #####    |  |
| 40 | 1 UK | 2020-12 | 2 UK-Norther | 3 | 1 | 3.548829 | #####    |  |
| 41 | 1 UK | 2020-12 | 2 UK-Norther | 3 | 2 | 2.666667 | #####    |  |
| 42 | 1 UK | 2020-12 | 2 UK-Norther | 3 | 3 | 3.8      | #####    |  |
| 43 | 1 UK | 2020-12 | 2 UK-Norther | 3 | 4 | 5.4      | 3.305975 |  |
| 44 | 1 UK | 2020-12 | 2 UK-Norther | 3 | 5 | 0        | 0        |  |
| 45 | 1 UK | 2020-12 | 2 UK-Overall | 1 | 1 | 2.384379 | #####    |  |
| 46 | 1 UK | 2020-12 | 2 UK-Overall | 1 | 2 | 2.827281 | #####    |  |
| 47 | 1 UK | 2020-12 | 2 UK-Overall | 1 | 3 | 2.253684 | #####    |  |
| 48 | 1 UK | 2020-12 | 2 UK-Overall | 1 | 4 | 2.837459 | #####    |  |
| 49 | 1 UK | 2020-12 | 2 UK-Overall | 1 | 5 | 1.338647 | #####    |  |
| 50 | 1 UK | 2020-12 | 2 UK-Overall | 2 | 1 | 2.24303  | #####    |  |
| 51 | 1 UK | 2020-12 | 2 UK-Overall | 2 | 2 | 2.155468 | #####    |  |
| 52 | 1 UK | 2020-12 | 2 UK-Overall | 2 | 3 | 2.643145 | #####    |  |
| 53 | 1 UK | 2020-12 | 2 UK-Overall | 2 | 4 | 2.518328 | #####    |  |
| 54 | 1 UK | 2020-12 | 2 UK-Overall | 2 | 5 | 1.162982 | #####    |  |
| 55 | 1 UK | 2020-12 | 2 UK-Overall | 3 | 1 | 2.459096 | #####    |  |
| 56 | 1 UK | 2020-12 | 2 UK-Overall | 3 | 2 | 3.142596 | #####    |  |
| 57 | 1 UK | 2020-12 | 2 UK-Overall | 3 | 3 | 2.047003 | #####    |  |
| 58 | 1 UK | 2020-12 | 2 UK-Overall | 3 | 4 | 2.991291 | #####    |  |
| 59 | 1 UK | 2020-12 | 2 UK-Overall | 3 |   |          |          |  |
| 60 | 1 UK | 2020-12 | 2 UK-Overall | 3 |   |          |          |  |

1  
2  
3  
4  
5  
6  
7  
8  
9  
10  
11  
12  
13  
14  
15  
16  
17  
18  
19  
20  
21  
22  
23  
24  
25  
26  
27  
28  
29  
30  
31  
32  
33  
34  
35  
36  
37  
38  
39  
40  
41  
42  
43  
44  
45  
46  
47  
48  
49  
50  
51  
52  
53  
54  
55  
56  
57  
58  
59  
60

|      |         |              |   |   |          |          |
|------|---------|--------------|---|---|----------|----------|
| 1 UK | 2020-12 | 2 UK-Overall | 3 | 5 | 1.463969 | #####    |
| 1 UK | 2020-12 | 2 UK-Scotlan | 1 | 1 | 1.833326 | #####    |
| 1 UK | 2020-12 | 2 UK-Scotlan | 1 | 2 | 2.004818 | #####    |
| 1 UK | 2020-12 | 2 UK-Scotlan | 1 | 3 | 1.817427 | #####    |
| 1 UK | 2020-12 | 2 UK-Scotlan | 1 | 4 | 2.074803 | #####    |
| 1 UK | 2020-12 | 2 UK-Scotlan | 1 | 5 | 1.0256   | #####    |
| 1 UK | 2020-12 | 2 UK-Scotlan | 2 | 1 | 2.574684 | #####    |
| 1 UK | 2020-12 | 2 UK-Scotlan | 2 | 2 | 2.8      | #####    |
| 1 UK | 2020-12 | 2 UK-Scotlan | 2 | 3 | 2.95     | #####    |
| 1 UK | 2020-12 | 2 UK-Scotlan | 2 | 4 | 2.428571 | #####    |
| 1 UK | 2020-12 | 2 UK-Scotlan | 2 | 5 | 1.375    | #####    |
| 1 UK | 2020-12 | 2 UK-Scotlan | 3 | 1 | 1.333162 | #####    |
| 1 UK | 2020-12 | 2 UK-Scotlan | 3 | 2 | 1.666667 | #####    |
| 1 UK | 2020-12 | 2 UK-Scotlan | 3 | 3 | 1.142857 | #####    |
| 1 UK | 2020-12 | 2 UK-Scotlan | 3 | 4 | 1.666667 | #####    |
| 1 UK | 2020-12 | 2 UK-Scotlan | 3 | 5 | #####    | #####    |
| 1 UK | 2020-12 | 2 UK-Wales   | 1 | 1 | 1.99411  | #####    |
| 1 UK | 2020-12 | 2 UK-Wales   | 1 | 2 | 3.75     | 1.243818 |
| 1 UK | 2020-12 | 2 UK-Wales   | 1 | 3 | 1.772191 | #####    |
| 1 UK | 2020-12 | 2 UK-Wales   | 1 | 4 | 2.361577 | #####    |
| 1 UK | 2020-12 | 2 UK-Wales   | 1 | 5 | #####    | #####    |
| 1 UK | 2020-12 | 2 UK-Wales   | 2 | 1 | 2.445345 | #####    |
| 1 UK | 2020-12 | 2 UK-Wales   | 2 | 2 | 3.75     | 1.243818 |
| 1 UK | 2020-12 | 2 UK-Wales   | 2 | 3 | 2.9      | #####    |
| 1 UK | 2020-12 | 2 UK-Wales   | 2 | 4 | 2.043478 | #####    |
| 1 UK | 2020-12 | 2 UK-Wales   | 2 | 5 | 1.181818 | #####    |
| 1 UK | 2020-12 | 2 UK-Wales   | 3 | 1 | 1.546567 | #####    |
| 1 UK | 2020-12 | 2 UK-Wales   | 3 | 3 | 0.75     | #####    |
| 1 UK | 2020-12 | 2 UK-Wales   | 3 | 4 | 2.588235 | #####    |
| 1 UK | 2020-12 | 2 UK-Wales   | 3 | 5 | 0.6      | #####    |
| 1 UK | 2020-12 | 3 UK-Englan  | 1 | 1 | #####    | #####    |
| 1 UK | 2020-12 | 3 UK-Englan  | 1 | 2 | 0        | 0        |
| 1 UK | 2020-12 | 3 UK-Englan  | 1 | 3 | #####    | #####    |
| 1 UK | 2020-12 | 3 UK-Englan  | 1 | 4 | #####    | #####    |
| 1 UK | 2020-12 | 3 UK-Englan  | 1 | 5 | 0        | 0        |
| 1 UK | 2020-12 | 3 UK-Englan  | 2 | 1 | #####    | #####    |
| 1 UK | 2020-12 | 3 UK-Englan  | 2 | 2 | 0        | 0        |
| 1 UK | 2020-12 | 3 UK-Englan  | 2 | 3 | #####    | #####    |
| 1 UK | 2020-12 | 3 UK-Englan  | 2 | 4 | #####    | #####    |
| 1 UK | 2020-12 | 3 UK-Englan  | 2 | 5 | 0        | 0        |
| 1 UK | 2020-12 | 3 UK-Englan  | 3 | 1 | #####    | #####    |
| 1 UK | 2020-12 | 3 UK-Englan  | 3 | 2 | 0        | 0        |
| 1 UK | 2020-12 | 3 UK-Englan  | 3 | 3 | 1.111111 | 1.079879 |
| 1 UK | 2020-12 | 3 UK-Englan  | 3 | 4 | #####    | #####    |
| 1 UK | 2020-12 | 3 UK-Englan  | 3 | 5 | 0        | 0        |
| 1 UK | 2020-12 | 3 UK-London  | 1 | 1 | #####    | #####    |
| 1 UK | 2020-12 | 3 UK-London  | 1 | 2 | #####    | #####    |
| 1 UK | 2020-12 | 3 UK-London  | 1 | 3 | #####    | #####    |
| 1 UK | 2020-12 | 3 UK-London  | 1 | 4 | 0        | 0        |
| 1 UK | 2020-12 | 3 UK-London  | 1 | 5 | 0        | 0        |
| 1 UK | 2020-12 | 3 UK-London  | 2 | 1 | #####    | #####    |
| 1 UK | 2020-12 | 3 UK-London  | 2 | 2 | #####    | #####    |
| 1 UK | 2020-12 | 3 UK-London  | 2 | 3 | #####    | #####    |
| 1 UK | 2020-12 | 3 UK-London  | 2 | 4 | 0        | 0        |
| 1 UK | 2020-12 | 3 UK-London  | 2 | 5 | 0        | 0        |
| 1 UK | 2020-12 | 3 UK-London  | 3 | 1 | #####    | #####    |



|    |      |         |              |   |   |       |          |  |
|----|------|---------|--------------|---|---|-------|----------|--|
| 1  |      |         |              |   |   |       |          |  |
| 2  |      |         |              |   |   |       |          |  |
| 3  | 1 UK | 2020-12 | 3 UK-London  | 3 | 2 | 1.25  | 1.082605 |  |
| 4  | 1 UK | 2020-12 | 3 UK-London  | 3 | 3 | 0     | 0        |  |
| 5  | 1 UK | 2020-12 | 3 UK-London  | 3 | 4 | 0     | 0        |  |
| 6  | 1 UK | 2020-12 | 3 UK-London  | 3 | 5 | 0     | 0        |  |
| 7  | 1 UK | 2020-12 | 3 UK-Norther | 1 | 1 | ##### | #####    |  |
| 8  | 1 UK | 2020-12 | 3 UK-Norther | 1 | 2 | 0     | 0        |  |
| 9  | 1 UK | 2020-12 | 3 UK-Norther | 1 | 3 | 0     | 0        |  |
| 10 | 1 UK | 2020-12 | 3 UK-Norther | 1 | 4 | ##### | #####    |  |
| 11 | 1 UK | 2020-12 | 3 UK-Norther | 1 | 5 | 0     | 0        |  |
| 12 | 1 UK | 2020-12 | 3 UK-Norther | 2 | 1 | ##### | #####    |  |
| 13 | 1 UK | 2020-12 | 3 UK-Norther | 2 | 2 | 0     | 0        |  |
| 14 | 1 UK | 2020-12 | 3 UK-Norther | 2 | 3 | 0     | 0        |  |
| 15 | 1 UK | 2020-12 | 3 UK-Norther | 2 | 4 | ##### | #####    |  |
| 16 | 1 UK | 2020-12 | 3 UK-Norther | 2 | 5 | 0     | 0        |  |
| 17 | 1 UK | 2020-12 | 3 UK-Norther | 3 | 1 | 0     | 0        |  |
| 18 | 1 UK | 2020-12 | 3 UK-Norther | 3 | 2 | 0     | 0        |  |
| 19 | 1 UK | 2020-12 | 3 UK-Norther | 3 | 3 | 0     | 0        |  |
| 20 | 1 UK | 2020-12 | 3 UK-Norther | 3 | 4 | 0     | 0        |  |
| 21 | 1 UK | 2020-12 | 3 UK-Norther | 3 | 5 | 0     | 0        |  |
| 22 | 1 UK | 2020-12 | 3 UK-Norther | 3 | 5 | 0     | 0        |  |
| 23 | 1 UK | 2020-12 | 3 UK-Overall | 1 | 1 | ##### | #####    |  |
| 24 | 1 UK | 2020-12 | 3 UK-Overall | 1 | 2 | ##### | #####    |  |
| 25 | 1 UK | 2020-12 | 3 UK-Overall | 1 | 3 | ##### | #####    |  |
| 26 | 1 UK | 2020-12 | 3 UK-Overall | 1 | 4 | ##### | #####    |  |
| 27 | 1 UK | 2020-12 | 3 UK-Overall | 1 | 5 | 0     | 0        |  |
| 28 | 1 UK | 2020-12 | 3 UK-Overall | 2 | 1 | ##### | #####    |  |
| 29 | 1 UK | 2020-12 | 3 UK-Overall | 2 | 2 | ##### | #####    |  |
| 30 | 1 UK | 2020-12 | 3 UK-Overall | 2 | 3 | ##### | #####    |  |
| 31 | 1 UK | 2020-12 | 3 UK-Overall | 2 | 4 | ##### | #####    |  |
| 32 | 1 UK | 2020-12 | 3 UK-Overall | 2 | 5 | 0     | 0        |  |
| 33 | 1 UK | 2020-12 | 3 UK-Overall | 3 | 1 | ##### | #####    |  |
| 34 | 1 UK | 2020-12 | 3 UK-Overall | 3 | 2 | ##### | #####    |  |
| 35 | 1 UK | 2020-12 | 3 UK-Overall | 3 | 3 | ##### | #####    |  |
| 36 | 1 UK | 2020-12 | 3 UK-Overall | 3 | 4 | ##### | #####    |  |
| 37 | 1 UK | 2020-12 | 3 UK-Overall | 3 | 5 | 0     | 0        |  |
| 38 | 1 UK | 2020-12 | 3 UK-Scotlan | 1 | 1 | ##### | #####    |  |
| 39 | 1 UK | 2020-12 | 3 UK-Scotlan | 1 | 2 | ##### | #####    |  |
| 40 | 1 UK | 2020-12 | 3 UK-Scotlan | 1 | 3 | ##### | #####    |  |
| 41 | 1 UK | 2020-12 | 3 UK-Scotlan | 1 | 4 | 0     | 0        |  |
| 42 | 1 UK | 2020-12 | 3 UK-Scotlan | 1 | 5 | 0     | 0        |  |
| 43 | 1 UK | 2020-12 | 3 UK-Scotlan | 2 | 1 | ##### | #####    |  |
| 44 | 1 UK | 2020-12 | 3 UK-Scotlan | 2 | 2 | 1.2   | 1.073385 |  |
| 45 | 1 UK | 2020-12 | 3 UK-Scotlan | 2 | 3 | 1.3   | #####    |  |
| 46 | 1 UK | 2020-12 | 3 UK-Scotlan | 2 | 4 | 0     | 0        |  |
| 47 | 1 UK | 2020-12 | 3 UK-Scotlan | 2 | 5 | 0     | 0        |  |
| 48 | 1 UK | 2020-12 | 3 UK-Scotlan | 3 | 1 | ##### | #####    |  |
| 49 | 1 UK | 2020-12 | 3 UK-Scotlan | 3 | 2 | ##### | #####    |  |
| 50 | 1 UK | 2020-12 | 3 UK-Scotlan | 3 | 3 | ##### | #####    |  |
| 51 | 1 UK | 2020-12 | 3 UK-Scotlan | 3 | 4 | 0     | 0        |  |
| 52 | 1 UK | 2020-12 | 3 UK-Scotlan | 3 | 5 | 0     | 0        |  |
| 53 | 1 UK | 2020-12 | 3 UK-Wales   | 1 | 1 | ##### | #####    |  |
| 54 | 1 UK | 2020-12 | 3 UK-Wales   | 1 | 2 | 1     | #####    |  |
| 55 | 1 UK | 2020-12 | 3 UK-Wales   | 1 | 3 | 0     | 0        |  |
| 56 | 1 UK | 2020-12 | 3 UK-Wales   | 1 | 4 | ##### | #####    |  |
| 57 | 1 UK | 2020-12 | 3 UK-Wales   | 1 | 5 | 0     | 0        |  |
| 58 | 1 UK | 2020-12 | 3 UK-Wales   | 2 | 1 | ##### | #####    |  |
| 59 | 1 UK | 2020-12 | 3 UK-Wales   | 2 | 2 | 1     | #####    |  |
| 60 | 1 UK | 2020-12 | 3 UK-Wales   | 2 | 2 | 1     | #####    |  |

|    |      |         |              |   |   |          |          |  |
|----|------|---------|--------------|---|---|----------|----------|--|
| 1  |      |         |              |   |   |          |          |  |
| 2  |      |         |              |   |   |          |          |  |
| 3  | 1 UK | 2020-12 | 3 UK-Wales   | 2 | 3 | 0        | 0        |  |
| 4  | 1 UK | 2020-12 | 3 UK-Wales   | 2 | 4 | 0        | 0        |  |
| 5  | 1 UK | 2020-12 | 3 UK-Wales   | 2 | 5 | 0        | 0        |  |
| 6  | 1 UK | 2020-12 | 3 UK-Wales   | 3 | 1 | #####    | #####    |  |
| 7  | 1 UK | 2020-12 | 3 UK-Wales   | 3 | 3 | 0        | 0        |  |
| 8  | 1 UK | 2020-12 | 3 UK-Wales   | 3 | 4 | #####    | #####    |  |
| 9  | 1 UK | 2020-12 | 3 UK-Wales   | 3 | 5 | 0        | 0        |  |
| 10 | 1 UK | 2020-12 | 4 UK-England | 1 | 1 | 2.602098 | #####    |  |
| 11 | 1 UK | 2020-12 | 4 UK-England | 1 | 2 | 3.222947 | 1.418446 |  |
| 12 | 1 UK | 2020-12 | 4 UK-England | 1 | 3 | 2.786248 | #####    |  |
| 13 | 1 UK | 2020-12 | 4 UK-England | 1 | 4 | 3.141649 | #####    |  |
| 14 | 1 UK | 2020-12 | 4 UK-England | 1 | 5 | #####    | #####    |  |
| 15 | 1 UK | 2020-12 | 4 UK-England | 2 | 1 | 2.110317 | #####    |  |
| 16 | 1 UK | 2020-12 | 4 UK-England | 2 | 2 | 3.2      | 1.927823 |  |
| 17 | 1 UK | 2020-12 | 4 UK-England | 2 | 3 | 3.035714 | 1.174294 |  |
| 18 | 1 UK | 2020-12 | 4 UK-England | 2 | 4 | 1.478261 | #####    |  |
| 19 | 1 UK | 2020-12 | 4 UK-England | 2 | 5 | 0        | 0        |  |
| 20 | 1 UK | 2020-12 | 4 UK-England | 3 | 1 | 2.855402 | #####    |  |
| 21 | 1 UK | 2020-12 | 4 UK-England | 3 | 2 | 3.230769 | 1.784848 |  |
| 22 | 1 UK | 2020-12 | 4 UK-England | 3 | 3 | 2.6      | 1.381879 |  |
| 23 | 1 UK | 2020-12 | 4 UK-England | 3 | 4 | 3.78125  | 1.262318 |  |
| 24 | 1 UK | 2020-12 | 4 UK-England | 3 | 5 | 1.333333 | #####    |  |
| 25 | 1 UK | 2020-12 | 4 UK-London  | 1 | 1 | 2.527593 | #####    |  |
| 26 | 1 UK | 2020-12 | 4 UK-London  | 1 | 2 | 2.030768 | 1.466555 |  |
| 27 | 1 UK | 2020-12 | 4 UK-London  | 1 | 3 | 3.362788 | 1.484361 |  |
| 28 | 1 UK | 2020-12 | 4 UK-London  | 1 | 4 | 1.867802 | #####    |  |
| 29 | 1 UK | 2020-12 | 4 UK-London  | 1 | 5 | 0        | 0        |  |
| 30 | 1 UK | 2020-12 | 4 UK-London  | 2 | 1 | 1.434163 | #####    |  |
| 31 | 1 UK | 2020-12 | 4 UK-London  | 2 | 2 | 4.285714 | 2.753397 |  |
| 32 | 1 UK | 2020-12 | 4 UK-London  | 2 | 3 | 0        | 0        |  |
| 33 | 1 UK | 2020-12 | 4 UK-London  | 2 | 4 | 1.8      | #####    |  |
| 34 | 1 UK | 2020-12 | 4 UK-London  | 2 | 5 | 0        | 0        |  |
| 35 | 1 UK | 2020-12 | 4 UK-London  | 3 | 1 | 3.141378 | 1.264216 |  |
| 36 | 1 UK | 2020-12 | 4 UK-London  | 3 | 2 | 0        | 0        |  |
| 37 | 1 UK | 2020-12 | 4 UK-London  | 3 | 3 | 4.692308 | 1.998313 |  |
| 38 | 1 UK | 2020-12 | 4 UK-London  | 3 | 4 | 1.916667 | 1.003245 |  |
| 39 | 1 UK | 2020-12 | 4 UK-London  | 3 | 5 | 0        | 0        |  |
| 40 | 1 UK | 2020-12 | 4 UK-Norther | 1 | 1 | 4.34044  | 1.618164 |  |
| 41 | 1 UK | 2020-12 | 4 UK-Norther | 1 | 2 | 4.400236 | 3.768209 |  |
| 42 | 1 UK | 2020-12 | 4 UK-Norther | 1 | 3 | 5.57933  | 2.69988  |  |
| 43 | 1 UK | 2020-12 | 4 UK-Norther | 1 | 4 | 3.491678 | 1.785866 |  |
| 44 | 1 UK | 2020-12 | 4 UK-Norther | 1 | 5 | 0        | 0        |  |
| 45 | 1 UK | 2020-12 | 4 UK-Norther | 2 | 1 | 1.442288 | #####    |  |
| 46 | 1 UK | 2020-12 | 4 UK-Norther | 2 | 2 | 0        | 0        |  |
| 47 | 1 UK | 2020-12 | 4 UK-Norther | 2 | 3 | 3.333333 | 2.721839 |  |
| 48 | 1 UK | 2020-12 | 4 UK-Norther | 2 | 4 | 1.818182 | 1.225287 |  |
| 49 | 1 UK | 2020-12 | 4 UK-Norther | 2 | 5 | 0        | 0        |  |
| 50 | 1 UK | 2020-12 | 4 UK-Norther | 3 | 1 | 5.521008 | 2.173935 |  |
| 51 | 1 UK | 2020-12 | 4 UK-Norther | 3 | 2 | 5.666667 | 4.627126 |  |
| 52 | 1 UK | 2020-12 | 4 UK-Norther | 3 | 3 | 6        | 3.149816 |  |
| 53 | 1 UK | 2020-12 | 4 UK-Norther | 3 | 4 | 5        | 3.118258 |  |
| 54 | 1 UK | 2020-12 | 4 UK-Norther | 3 | 5 | 0        | 0        |  |
| 55 | 1 UK | 2020-12 | 4 UK-Overall | 1 | 1 | 2.675698 | #####    |  |
| 56 | 1 UK | 2020-12 | 4 UK-Overall | 1 | 2 | 3.082947 | 1.053367 |  |
| 57 | 1 UK | 2020-12 | 4 UK-Overall | 1 | 3 | 3.251734 | #####    |  |
| 58 | 1 UK | 2020-12 | 4 UK-Overall | 1 | 4 | 2.788474 | #####    |  |
| 59 | 1 UK | 2020-12 | 4 UK-Overall | 1 |   |          |          |  |
| 60 | 1 UK | 2020-12 | 4 UK-Overall | 1 |   |          |          |  |

|    |      |         |              |   |   |          |          |  |
|----|------|---------|--------------|---|---|----------|----------|--|
| 1  |      |         |              |   |   |          |          |  |
| 2  |      |         |              |   |   |          |          |  |
| 3  | 1 UK | 2020-12 | 4 UK-Overall | 1 | 5 | #####    | #####    |  |
| 4  | 1 UK | 2020-12 | 4 UK-Overall | 2 | 1 | 1.964585 | #####    |  |
| 5  | 1 UK | 2020-12 | 4 UK-Overall | 2 | 2 | 3.258746 | 1.339782 |  |
| 6  | 1 UK | 2020-12 | 4 UK-Overall | 2 | 3 | 2.278369 | #####    |  |
| 7  | 1 UK | 2020-12 | 4 UK-Overall | 2 | 4 | 1.866098 | #####    |  |
| 8  | 1 UK | 2020-12 | 4 UK-Overall | 2 | 5 | #####    | #####    |  |
| 9  | 1 UK | 2020-12 | 4 UK-Overall | 3 | 1 | 3.06851  | #####    |  |
| 10 | 1 UK | 2020-12 | 4 UK-Overall | 3 | 2 | 3.004774 | 1.40012  |  |
| 11 | 1 UK | 2020-12 | 4 UK-Overall | 3 | 3 | 3.819103 | 1.010526 |  |
| 12 | 1 UK | 2020-12 | 4 UK-Overall | 3 | 4 | 3.278057 | #####    |  |
| 13 | 1 UK | 2020-12 | 4 UK-Overall | 3 | 5 | 1.026439 | #####    |  |
| 14 | 1 UK | 2020-12 | 4 UK-Scotlan | 1 | 1 | 3.024065 | #####    |  |
| 15 | 1 UK | 2020-12 | 4 UK-Scotlan | 1 | 2 | 3.927527 | 2.709785 |  |
| 16 | 1 UK | 2020-12 | 4 UK-Scotlan | 1 | 3 | 3.510464 | #####    |  |
| 17 | 1 UK | 2020-12 | 4 UK-Scotlan | 1 | 4 | 2.799984 | #####    |  |
| 18 | 1 UK | 2020-12 | 4 UK-Scotlan | 1 | 5 | #####    | #####    |  |
| 19 | 1 UK | 2020-12 | 4 UK-Scotlan | 2 | 1 | 3.294443 | #####    |  |
| 20 | 1 UK | 2020-12 | 4 UK-Scotlan | 2 | 2 | 3.75     | 3.247814 |  |
| 21 | 1 UK | 2020-12 | 4 UK-Scotlan | 2 | 3 | 3.526316 | 1.424786 |  |
| 22 | 1 UK | 2020-12 | 4 UK-Scotlan | 2 | 4 | 4.15     | 1.402369 |  |
| 23 | 1 UK | 2020-12 | 4 UK-Scotlan | 2 | 5 | 0.125    | #####    |  |
| 24 | 1 UK | 2020-12 | 4 UK-Scotlan | 3 | 1 | 2.829734 | 1.1213   |  |
| 25 | 1 UK | 2020-12 | 4 UK-Scotlan | 3 | 2 | 4        | 3.57795  |  |
| 26 | 1 UK | 2020-12 | 4 UK-Scotlan | 3 | 3 | 3.5      | 1.330816 |  |
| 27 | 1 UK | 2020-12 | 4 UK-Scotlan | 3 | 4 | 1.181818 | #####    |  |
| 28 | 1 UK | 2020-12 | 4 UK-Scotlan | 3 | 5 | 0        | 0        |  |
| 29 | 1 UK | 2020-12 | 4 UK-Wales   | 1 | 1 | 2.424875 | 1.025542 |  |
| 30 | 1 UK | 2020-12 | 4 UK-Wales   | 1 | 2 | 1        | #####    |  |
| 31 | 1 UK | 2020-12 | 4 UK-Wales   | 1 | 3 | 6.229189 | 3.385481 |  |
| 32 | 1 UK | 2020-12 | 4 UK-Wales   | 1 | 4 | 1.881351 | #####    |  |
| 33 | 1 UK | 2020-12 | 4 UK-Wales   | 1 | 5 | #####    | #####    |  |
| 34 | 1 UK | 2020-12 | 4 UK-Wales   | 2 | 1 | #####    | #####    |  |
| 35 | 1 UK | 2020-12 | 4 UK-Wales   | 2 | 2 | 1        | #####    |  |
| 36 | 1 UK | 2020-12 | 4 UK-Wales   | 2 | 3 | #####    | #####    |  |
| 37 | 1 UK | 2020-12 | 4 UK-Wales   | 2 | 4 | #####    | #####    |  |
| 38 | 1 UK | 2020-12 | 4 UK-Wales   | 2 | 5 | 0        | 0        |  |
| 39 | 1 UK | 2020-12 | 4 UK-Wales   | 3 | 1 | 4.186264 | 1.828423 |  |
| 40 | 1 UK | 2020-12 | 4 UK-Wales   | 3 | 3 | 10       | 5.000337 |  |
| 41 | 1 UK | 2020-12 | 4 UK-Wales   | 3 | 4 | 2.75     | 1.432151 |  |
| 42 | 1 UK | 2020-12 | 4 UK-Wales   | 3 | 5 | 0.3      | #####    |  |
| 43 | 1 UK | 2020-12 | 5 UK-Englan  | 1 | 1 | 3.279409 | #####    |  |
| 44 | 1 UK | 2020-12 | 5 UK-Englan  | 1 | 2 | 2.897023 | 1.329838 |  |
| 45 | 1 UK | 2020-12 | 5 UK-Englan  | 1 | 3 | 2.886555 | #####    |  |
| 46 | 1 UK | 2020-12 | 5 UK-Englan  | 1 | 4 | 3.850098 | #####    |  |
| 47 | 1 UK | 2020-12 | 5 UK-Englan  | 1 | 5 | 3.832631 | #####    |  |
| 48 | 1 UK | 2020-12 | 5 UK-Englan  | 2 | 1 | 2.767064 | #####    |  |
| 49 | 1 UK | 2020-12 | 5 UK-Englan  | 2 | 2 | 2.833333 | 1.195171 |  |
| 50 | 1 UK | 2020-12 | 5 UK-Englan  | 2 | 3 | 2.178571 | #####    |  |
| 51 | 1 UK | 2020-12 | 5 UK-Englan  | 2 | 4 | 5.047619 | 1.480855 |  |
| 52 | 1 UK | 2020-12 | 5 UK-Englan  | 2 | 5 | 2        | #####    |  |
| 53 | 1 UK | 2020-12 | 5 UK-Englan  | 3 | 1 | 3.530344 | #####    |  |
| 54 | 1 UK | 2020-12 | 5 UK-Englan  | 3 | 2 | 2.923077 | 1.808916 |  |
| 55 | 1 UK | 2020-12 | 5 UK-Englan  | 3 | 3 | 3.352941 | #####    |  |
| 56 | 1 UK | 2020-12 | 5 UK-Englan  | 3 | 4 | 3.486486 | 1.057669 |  |
| 57 | 1 UK | 2020-12 | 5 UK-Englan  | 3 | 5 | 5        | 1.052784 |  |
| 58 | 1 UK | 2020-12 | 5 UK-London  | 1 | 1 | 3.238394 | #####    |  |
| 59 | 1 UK | 2020-12 | 5 UK-London  | 1 | 1 | 3.238394 | #####    |  |
| 60 | 1 UK | 2020-12 | 5 UK-London  | 1 | 1 | 3.238394 | #####    |  |

|    |      |         |              |   |   |          |          |
|----|------|---------|--------------|---|---|----------|----------|
| 1  |      |         |              |   |   |          |          |
| 2  |      |         |              |   |   |          |          |
| 3  | 1 UK | 2020-12 | 5 UK-London  | 1 | 2 | #####    | #####    |
| 4  | 1 UK | 2020-12 | 5 UK-London  | 1 | 3 | 4.411503 | 1.42895  |
| 5  | 1 UK | 2020-12 | 5 UK-London  | 1 | 4 | 2.730877 | 1.031471 |
| 6  | 1 UK | 2020-12 | 5 UK-London  | 1 | 5 | 2.06243  | #####    |
| 7  | 1 UK | 2020-12 | 5 UK-London  | 2 | 1 | 4.462549 | 1.214582 |
| 8  | 1 UK | 2020-12 | 5 UK-London  | 2 | 2 | 1.428571 | #####    |
| 9  | 1 UK | 2020-12 | 5 UK-London  | 2 | 3 | 7.461538 | 2.24181  |
| 10 | 1 UK | 2020-12 | 5 UK-London  | 2 | 4 | 2.444444 | 1.078608 |
| 11 | 1 UK | 2020-12 | 5 UK-London  | 2 | 5 | 1.333333 | 1.045342 |
| 12 | 1 UK | 2020-12 | 5 UK-London  | 3 | 1 | 2.405726 | 1.064883 |
| 13 | 1 UK | 2020-12 | 5 UK-London  | 3 | 2 | 0        | 0        |
| 14 | 1 UK | 2020-12 | 5 UK-London  | 3 | 3 | 2.727273 | 1.706161 |
| 15 | 1 UK | 2020-12 | 5 UK-London  | 3 | 4 | 2.916667 | 1.547765 |
| 16 | 1 UK | 2020-12 | 5 UK-London  | 3 | 5 | 2.666667 | 1.407746 |
| 17 | 1 UK | 2020-12 | 5 UK-Norther | 1 | 1 | 2.984427 | #####    |
| 18 | 1 UK | 2020-12 | 5 UK-Norther | 1 | 2 | 3.517675 | 1.735159 |
| 19 | 1 UK | 2020-12 | 5 UK-Norther | 1 | 3 | 2.463464 | 1.413217 |
| 20 | 1 UK | 2020-12 | 5 UK-Norther | 1 | 4 | 3.701216 | 1.004779 |
| 21 | 1 UK | 2020-12 | 5 UK-Norther | 1 | 5 | #####    | #####    |
| 22 | 1 UK | 2020-12 | 5 UK-Norther | 2 | 1 | 2.086676 | #####    |
| 23 | 1 UK | 2020-12 | 5 UK-Norther | 2 | 2 | 3        | 0        |
| 24 | 1 UK | 2020-12 | 5 UK-Norther | 2 | 3 | #####    | #####    |
| 25 | 1 UK | 2020-12 | 5 UK-Norther | 2 | 4 | 2.714286 | #####    |
| 26 | 1 UK | 2020-12 | 5 UK-Norther | 2 | 5 | #####    | #####    |
| 27 | 1 UK | 2020-12 | 5 UK-Norther | 3 | 1 | 3.390121 | 1.11689  |
| 28 | 1 UK | 2020-12 | 5 UK-Norther | 3 | 2 | 3.666667 | 2.227921 |
| 29 | 1 UK | 2020-12 | 5 UK-Norther | 3 | 3 | 2.8      | 1.659027 |
| 30 | 1 UK | 2020-12 | 5 UK-Norther | 3 | 4 | 4.833333 | 1.770503 |
| 31 | 1 UK | 2020-12 | 5 UK-Norther | 3 | 5 | 1        | 0        |
| 32 | 1 UK | 2020-12 | 5 UK-Overall | 1 | 1 | 3.115589 | #####    |
| 33 | 1 UK | 2020-12 | 5 UK-Overall | 1 | 2 | 2.683077 | #####    |
| 34 | 1 UK | 2020-12 | 5 UK-Overall | 1 | 3 | 3.067158 | #####    |
| 35 | 1 UK | 2020-12 | 5 UK-Overall | 1 | 4 | 3.526234 | #####    |
| 36 | 1 UK | 2020-12 | 5 UK-Overall | 1 | 5 | 3.291275 | #####    |
| 37 | 1 UK | 2020-12 | 5 UK-Overall | 2 | 1 | 3.054369 | #####    |
| 38 | 1 UK | 2020-12 | 5 UK-Overall | 2 | 2 | 2.57949  | #####    |
| 39 | 1 UK | 2020-12 | 5 UK-Overall | 2 | 3 | 3.466211 | #####    |
| 40 | 1 UK | 2020-12 | 5 UK-Overall | 2 | 4 | 3.780772 | #####    |
| 41 | 1 UK | 2020-12 | 5 UK-Overall | 2 | 5 | 1.914856 | #####    |
| 42 | 1 UK | 2020-12 | 5 UK-Overall | 3 | 1 | 3.14981  | #####    |
| 43 | 1 UK | 2020-12 | 5 UK-Overall | 3 | 2 | 2.736085 | 1.397213 |
| 44 | 1 UK | 2020-12 | 5 UK-Overall | 3 | 3 | 2.825292 | #####    |
| 45 | 1 UK | 2020-12 | 5 UK-Overall | 3 | 4 | 3.409264 | #####    |
| 46 | 1 UK | 2020-12 | 5 UK-Overall | 3 | 5 | 4.248224 | #####    |
| 47 | 1 UK | 2020-12 | 5 UK-Scotlan | 1 | 1 | 2.244386 | #####    |
| 48 | 1 UK | 2020-12 | 5 UK-Scotlan | 1 | 2 | 3.529837 | 1.087603 |
| 49 | 1 UK | 2020-12 | 5 UK-Scotlan | 1 | 3 | 1.403117 | #####    |
| 50 | 1 UK | 2020-12 | 5 UK-Scotlan | 1 | 4 | 2.686145 | #####    |
| 51 | 1 UK | 2020-12 | 5 UK-Scotlan | 1 | 5 | 2.017902 | #####    |
| 52 | 1 UK | 2020-12 | 5 UK-Scotlan | 2 | 1 | 2.815415 | #####    |
| 53 | 1 UK | 2020-12 | 5 UK-Scotlan | 2 | 2 | 3.6      | 1.615039 |
| 54 | 1 UK | 2020-12 | 5 UK-Scotlan | 2 | 3 | 1.736842 | 0.5462   |
| 55 | 1 UK | 2020-12 | 5 UK-Scotlan | 2 | 4 | 3.714286 | 1.214401 |
| 56 | 1 UK | 2020-12 | 5 UK-Scotlan | 2 | 5 | 3        | 1.561355 |
| 57 | 1 UK | 2020-12 | 5 UK-Scotlan | 3 | 1 | 1.867058 | #####    |
| 58 | 1 UK | 2020-12 | 5 UK-Scotlan | 3 | 2 | 3.5      | 1.389538 |
| 59 | 1 UK | 2020-12 | 5 UK-Scotlan | 3 |   |          |          |
| 60 | 1 UK | 2020-12 | 5 UK-Scotlan | 3 |   |          |          |

|    |      |         |              |   |   |          |          |  |
|----|------|---------|--------------|---|---|----------|----------|--|
| 1  |      |         |              |   |   |          |          |  |
| 2  |      |         |              |   |   |          |          |  |
| 3  | 1 UK | 2020-12 | 5 UK-Scotlan | 3 | 3 | 1.214286 | #####    |  |
| 4  | 1 UK | 2020-12 | 5 UK-Scotlan | 3 | 4 | 1.5      | #####    |  |
| 5  | 1 UK | 2020-12 | 5 UK-Scotlan | 3 | 5 | 1.142857 | #####    |  |
| 6  | 1 UK | 2020-12 | 5 UK-Wales   | 1 | 1 | 2.231857 | #####    |  |
| 7  | 1 UK | 2020-12 | 5 UK-Wales   | 1 | 2 | 2.75     | 1.386411 |  |
| 8  | 1 UK | 2020-12 | 5 UK-Wales   | 1 | 3 | #####    | #####    |  |
| 9  | 1 UK | 2020-12 | 5 UK-Wales   | 1 | 4 | 3.50511  | #####    |  |
| 10 | 1 UK | 2020-12 | 5 UK-Wales   | 1 | 5 | 1.688905 | #####    |  |
| 11 | 1 UK | 2020-12 | 5 UK-Wales   | 2 | 1 | 1.681355 | #####    |  |
| 12 | 1 UK | 2020-12 | 5 UK-Wales   | 2 | 2 | 2.75     | 1.386411 |  |
| 13 | 1 UK | 2020-12 | 5 UK-Wales   | 2 | 3 | 0.9      | #####    |  |
| 14 | 1 UK | 2020-12 | 5 UK-Wales   | 2 | 4 | 1.695652 | #####    |  |
| 15 | 1 UK | 2020-12 | 5 UK-Wales   | 2 | 5 | 1.545455 | #####    |  |
| 16 | 1 UK | 2020-12 | 5 UK-Wales   | 3 | 1 | 2.836642 | #####    |  |
| 17 | 1 UK | 2020-12 | 5 UK-Wales   | 3 | 3 | 0        | 0        |  |
| 18 | 1 UK | 2020-12 | 5 UK-Wales   | 3 | 4 | 4.875    | 1.29272  |  |
| 19 | 1 UK | 2020-12 | 5 UK-Wales   | 3 | 5 | 1.8      | #####    |  |
| 20 | 1 UK | 2020-12 | 5 UK-Wales   | 3 | 5 | 1.8      | #####    |  |
| 21 | 1 UK | 2020-13 | 1 UK-Englan  | 1 | 1 | 3.848558 | #####    |  |
| 22 | 1 UK | 2020-13 | 1 UK-Englan  | 1 | 2 | 4.933895 | #####    |  |
| 23 | 1 UK | 2020-13 | 1 UK-Englan  | 1 | 3 | 4.717244 | #####    |  |
| 24 | 1 UK | 2020-13 | 1 UK-Englan  | 1 | 4 | 3.558346 | #####    |  |
| 25 | 1 UK | 2020-13 | 1 UK-Englan  | 1 | 5 | 2.20122  | #####    |  |
| 26 | 1 UK | 2020-13 | 1 UK-Englan  | 2 | 1 | 3.674019 | #####    |  |
| 27 | 1 UK | 2020-13 | 1 UK-Englan  | 2 | 2 | 4.7      | #####    |  |
| 28 | 1 UK | 2020-13 | 1 UK-Englan  | 2 | 3 | 4.42803  | #####    |  |
| 29 | 1 UK | 2020-13 | 1 UK-Englan  | 2 | 4 | 3.551559 | #####    |  |
| 30 | 1 UK | 2020-13 | 1 UK-Englan  | 2 | 5 | 2.073359 | #####    |  |
| 31 | 1 UK | 2020-13 | 1 UK-Englan  | 3 | 1 | 4.042607 | #####    |  |
| 32 | 1 UK | 2020-13 | 1 UK-Englan  | 3 | 2 | 5.315789 | 1.410489 |  |
| 33 | 1 UK | 2020-13 | 1 UK-Englan  | 3 | 3 | 5        | #####    |  |
| 34 | 1 UK | 2020-13 | 1 UK-Englan  | 3 | 4 | 3.565421 | #####    |  |
| 35 | 1 UK | 2020-13 | 1 UK-Englan  | 3 | 5 | 2.361446 | #####    |  |
| 36 | 1 UK | 2020-13 | 1 UK-London  | 1 | 1 | 3.087173 | #####    |  |
| 37 | 1 UK | 2020-13 | 1 UK-London  | 1 | 2 | 3.090039 | #####    |  |
| 38 | 1 UK | 2020-13 | 1 UK-London  | 1 | 3 | 3.270903 | #####    |  |
| 39 | 1 UK | 2020-13 | 1 UK-London  | 1 | 4 | 3.132423 | #####    |  |
| 40 | 1 UK | 2020-13 | 1 UK-London  | 1 | 5 | 2.438556 | #####    |  |
| 41 | 1 UK | 2020-13 | 1 UK-London  | 2 | 1 | 3.269436 | #####    |  |
| 42 | 1 UK | 2020-13 | 1 UK-London  | 2 | 2 | 3.434783 | #####    |  |
| 43 | 1 UK | 2020-13 | 1 UK-London  | 2 | 3 | 3.814286 | #####    |  |
| 44 | 1 UK | 2020-13 | 1 UK-London  | 2 | 4 | 2.864198 | #####    |  |
| 45 | 1 UK | 2020-13 | 1 UK-London  | 2 | 5 | 2.346939 | #####    |  |
| 46 | 1 UK | 2020-13 | 1 UK-London  | 3 | 1 | 2.864854 | #####    |  |
| 47 | 1 UK | 2020-13 | 1 UK-London  | 3 | 2 | 2.75     | #####    |  |
| 48 | 1 UK | 2020-13 | 1 UK-London  | 3 | 3 | 2.56     | #####    |  |
| 49 | 1 UK | 2020-13 | 1 UK-London  | 3 | 4 | 3.435484 | #####    |  |
| 50 | 1 UK | 2020-13 | 1 UK-London  | 3 | 5 | 2.571429 | #####    |  |
| 51 | 1 UK | 2020-13 | 1 UK-Norther | 1 | 1 | 4.54086  | #####    |  |
| 52 | 1 UK | 2020-13 | 1 UK-Norther | 1 | 2 | 5.788954 | 1.910702 |  |
| 53 | 1 UK | 2020-13 | 1 UK-Norther | 1 | 3 | 4.309879 | #####    |  |
| 54 | 1 UK | 2020-13 | 1 UK-Norther | 1 | 4 | 5.375105 | #####    |  |
| 55 | 1 UK | 2020-13 | 1 UK-Norther | 1 | 5 | 2.587602 | #####    |  |
| 56 | 1 UK | 2020-13 | 1 UK-Norther | 2 | 1 | 4.693757 | #####    |  |
| 57 | 1 UK | 2020-13 | 1 UK-Norther | 2 | 2 | 6.222222 | 2.566709 |  |
| 58 | 1 UK | 2020-13 | 1 UK-Norther | 2 | 3 | 5.418182 | #####    |  |
| 59 | 1 UK | 2020-13 | 1 UK-Norther | 2 | 4 | 4.554348 | #####    |  |
| 60 | 1 UK | 2020-13 | 1 UK-Norther | 2 | 4 | 4.554348 | #####    |  |

|    |      |         |              |   |   |          |          |  |
|----|------|---------|--------------|---|---|----------|----------|--|
| 1  |      |         |              |   |   |          |          |  |
| 2  |      |         |              |   |   |          |          |  |
| 3  | 1 UK | 2020-13 | 1 UK-Norther | 2 | 5 | 1.617647 | #####    |  |
| 4  | 1 UK | 2020-13 | 1 UK-Norther | 3 | 1 | 4.313439 | #####    |  |
| 5  | 1 UK | 2020-13 | 1 UK-Norther | 3 | 2 | 4.666667 | 1.515456 |  |
| 6  | 1 UK | 2020-13 | 1 UK-Norther | 3 | 3 | 2.846154 | #####    |  |
| 7  | 1 UK | 2020-13 | 1 UK-Norther | 3 | 4 | 6.655172 | 1.507338 |  |
| 8  | 1 UK | 2020-13 | 1 UK-Norther | 3 | 5 | 3.7      | 1.140472 |  |
| 9  | 1 UK | 2020-13 | 1 UK-Overall | 1 | 1 | 3.731433 | #####    |  |
| 10 | 1 UK | 2020-13 | 1 UK-Overall | 1 | 2 | 4.486757 | #####    |  |
| 11 | 1 UK | 2020-13 | 1 UK-Overall | 1 | 3 | 4.437572 | #####    |  |
| 12 | 1 UK | 2020-13 | 1 UK-Overall | 1 | 4 | 3.602243 | #####    |  |
| 13 | 1 UK | 2020-13 | 1 UK-Overall | 1 | 5 | 2.184046 | #####    |  |
| 14 | 1 UK | 2020-13 | 1 UK-Overall | 2 | 1 | 3.594706 | #####    |  |
| 15 | 1 UK | 2020-13 | 1 UK-Overall | 2 | 2 | 4.36655  | #####    |  |
| 16 | 1 UK | 2020-13 | 1 UK-Overall | 2 | 3 | 4.293773 | #####    |  |
| 17 | 1 UK | 2020-13 | 1 UK-Overall | 2 | 4 | 3.516702 | #####    |  |
| 18 | 1 UK | 2020-13 | 1 UK-Overall | 2 | 5 | 2.052251 | #####    |  |
| 19 | 1 UK | 2020-13 | 1 UK-Overall | 3 | 1 | 3.888013 | #####    |  |
| 20 | 1 UK | 2020-13 | 1 UK-Overall | 3 | 2 | 4.658453 | #####    |  |
| 21 | 1 UK | 2020-13 | 1 UK-Overall | 3 | 3 | 4.589069 | #####    |  |
| 22 | 1 UK | 2020-13 | 1 UK-Overall | 3 | 4 | 3.695348 | #####    |  |
| 23 | 1 UK | 2020-13 | 1 UK-Overall | 3 | 5 | 2.352672 | #####    |  |
| 24 | 1 UK | 2020-13 | 1 UK-Scotlan | 1 | 1 | 3.78365  | #####    |  |
| 25 | 1 UK | 2020-13 | 1 UK-Scotlan | 1 | 2 | 4.026661 | 1.248773 |  |
| 26 | 1 UK | 2020-13 | 1 UK-Scotlan | 1 | 3 | 4.336905 | #####    |  |
| 27 | 1 UK | 2020-13 | 1 UK-Scotlan | 1 | 4 | 4.092143 | #####    |  |
| 28 | 1 UK | 2020-13 | 1 UK-Scotlan | 1 | 5 | 1.999138 | #####    |  |
| 29 | 1 UK | 2020-13 | 1 UK-Scotlan | 2 | 1 | 3.378174 | #####    |  |
| 30 | 1 UK | 2020-13 | 1 UK-Scotlan | 2 | 2 | 2        | #####    |  |
| 31 | 1 UK | 2020-13 | 1 UK-Scotlan | 2 | 3 | 4.021739 | #####    |  |
| 32 | 1 UK | 2020-13 | 1 UK-Scotlan | 2 | 4 | 3.913514 | #####    |  |
| 33 | 1 UK | 2020-13 | 1 UK-Scotlan | 2 | 5 | 1.959184 | #####    |  |
| 34 | 1 UK | 2020-13 | 1 UK-Scotlan | 3 | 1 | 4.256186 | #####    |  |
| 35 | 1 UK | 2020-13 | 1 UK-Scotlan | 3 | 2 | 7        | 2.789677 |  |
| 36 | 1 UK | 2020-13 | 1 UK-Scotlan | 3 | 3 | 4.660714 | #####    |  |
| 37 | 1 UK | 2020-13 | 1 UK-Scotlan | 3 | 4 | 4.31     | #####    |  |
| 38 | 1 UK | 2020-13 | 1 UK-Scotlan | 3 | 5 | 2.04918  | #####    |  |
| 39 | 1 UK | 2020-13 | 1 UK-Wales   | 1 | 1 | 3.343112 | #####    |  |
| 40 | 1 UK | 2020-13 | 1 UK-Wales   | 1 | 2 | 2.717594 | #####    |  |
| 41 | 1 UK | 2020-13 | 1 UK-Wales   | 1 | 3 | 4.667903 | #####    |  |
| 42 | 1 UK | 2020-13 | 1 UK-Wales   | 1 | 4 | 3.527709 | #####    |  |
| 43 | 1 UK | 2020-13 | 1 UK-Wales   | 1 | 5 | 1.647491 | 0.19384  |  |
| 44 | 1 UK | 2020-13 | 1 UK-Wales   | 2 | 1 | 3.11439  | #####    |  |
| 45 | 1 UK | 2020-13 | 1 UK-Wales   | 2 | 2 | 3.5      | #####    |  |
| 46 | 1 UK | 2020-13 | 1 UK-Wales   | 2 | 3 | 3.966292 | #####    |  |
| 47 | 1 UK | 2020-13 | 1 UK-Wales   | 2 | 4 | 3.358025 | #####    |  |
| 48 | 1 UK | 2020-13 | 1 UK-Wales   | 2 | 5 | 1.639175 | #####    |  |
| 49 | 1 UK | 2020-13 | 1 UK-Wales   | 3 | 1 | 3.616747 | #####    |  |
| 50 | 1 UK | 2020-13 | 1 UK-Wales   | 3 | 2 | 2.333333 | #####    |  |
| 51 | 1 UK | 2020-13 | 1 UK-Wales   | 3 | 3 | 5.652174 | 1.289287 |  |
| 52 | 1 UK | 2020-13 | 1 UK-Wales   | 3 | 4 | 3.726027 | #####    |  |
| 53 | 1 UK | 2020-13 | 1 UK-Wales   | 3 | 5 | 1.659574 | #####    |  |
| 54 | 1 UK | 2020-13 | 2 UK-Englan  | 1 | 1 | 1.685991 | #####    |  |
| 55 | 1 UK | 2020-13 | 2 UK-Englan  | 1 | 2 | 2.218373 | #####    |  |
| 56 | 1 UK | 2020-13 | 2 UK-Englan  | 1 | 3 | 1.959814 | #####    |  |
| 57 | 1 UK | 2020-13 | 2 UK-Englan  | 1 | 4 | 1.489292 | #####    |  |
| 58 | 1 UK | 2020-13 | 2 UK-Englan  | 1 | 5 | 1.17438  | #####    |  |
| 59 | 1 UK | 2020-13 | 2 UK-Englan  | 1 |   |          |          |  |
| 60 | 1 UK | 2020-13 | 2 UK-Englan  | 1 |   |          |          |  |

|    |      |         |               |   |   |          |       |  |
|----|------|---------|---------------|---|---|----------|-------|--|
| 1  |      |         |               |   |   |          |       |  |
| 2  |      |         |               |   |   |          |       |  |
| 3  | 1 UK | 2020-13 | 2 UK-England  | 2 | 1 | 1.789185 | ##### |  |
| 4  | 1 UK | 2020-13 | 2 UK-England  | 2 | 2 | 2.364865 | ##### |  |
| 5  | 1 UK | 2020-13 | 2 UK-England  | 2 | 3 | 2.189091 | ##### |  |
| 6  | 1 UK | 2020-13 | 2 UK-England  | 2 | 4 | 1.526437 | ##### |  |
| 7  | 1 UK | 2020-13 | 2 UK-England  | 2 | 5 | 1.165385 | ##### |  |
| 8  | 1 UK | 2020-13 | 2 UK-England  | 3 | 1 | 1.574309 | ##### |  |
| 9  | 1 UK | 2020-13 | 2 UK-England  | 3 | 2 | 2        | ##### |  |
| 10 | 1 UK | 2020-13 | 2 UK-England  | 3 | 3 | 1.747899 | ##### |  |
| 11 | 1 UK | 2020-13 | 2 UK-England  | 3 | 4 | 1.45     | ##### |  |
| 12 | 1 UK | 2020-13 | 2 UK-England  | 3 | 5 | 1.185629 | ##### |  |
| 13 | 1 UK | 2020-13 | 2 UK-London   | 1 | 1 | 1.660732 | ##### |  |
| 14 | 1 UK | 2020-13 | 2 UK-London   | 1 | 2 | 2.468842 | ##### |  |
| 15 | 1 UK | 2020-13 | 2 UK-London   | 1 | 3 | 1.770111 | ##### |  |
| 16 | 1 UK | 2020-13 | 2 UK-London   | 1 | 4 | 1.512591 | ##### |  |
| 17 | 1 UK | 2020-13 | 2 UK-London   | 1 | 5 | #####    | ##### |  |
| 18 | 1 UK | 2020-13 | 2 UK-London   | 2 | 1 | 1.854014 | ##### |  |
| 19 | 1 UK | 2020-13 | 2 UK-London   | 2 | 2 | 2.521739 | ##### |  |
| 20 | 1 UK | 2020-13 | 2 UK-London   | 2 | 3 | 2.175676 | ##### |  |
| 21 | 1 UK | 2020-13 | 2 UK-London   | 2 | 4 | 1.564706 | ##### |  |
| 22 | 1 UK | 2020-13 | 2 UK-London   | 2 | 5 | #####    | ##### |  |
| 23 | 1 UK | 2020-13 | 2 UK-London   | 3 | 1 | 1.424354 | ##### |  |
| 24 | 1 UK | 2020-13 | 2 UK-London   | 3 | 2 | 2.416667 | ##### |  |
| 25 | 1 UK | 2020-13 | 2 UK-London   | 3 | 3 | 1.230769 | ##### |  |
| 26 | 1 UK | 2020-13 | 2 UK-London   | 3 | 4 | 1.454545 | ##### |  |
| 27 | 1 UK | 2020-13 | 2 UK-London   | 3 | 5 | 0.75     | ##### |  |
| 28 | 1 UK | 2020-13 | 2 UK-Norther  | 1 | 1 | 1.846769 | ##### |  |
| 29 | 1 UK | 2020-13 | 2 UK-Norther  | 1 | 2 | 2.092843 | ##### |  |
| 30 | 1 UK | 2020-13 | 2 UK-Norther  | 1 | 3 | 2.164535 | ##### |  |
| 31 | 1 UK | 2020-13 | 2 UK-Norther  | 1 | 4 | 1.784269 | ##### |  |
| 32 | 1 UK | 2020-13 | 2 UK-Norther  | 1 | 5 | 1.061736 | ##### |  |
| 33 | 1 UK | 2020-13 | 2 UK-Norther  | 2 | 1 | 1.80325  | ##### |  |
| 34 | 1 UK | 2020-13 | 2 UK-Norther  | 2 | 2 | 2        | ##### |  |
| 35 | 1 UK | 2020-13 | 2 UK-Norther  | 2 | 3 | 2.410714 | ##### |  |
| 36 | 1 UK | 2020-13 | 2 UK-Norther  | 2 | 4 | 1.431579 | ##### |  |
| 37 | 1 UK | 2020-13 | 2 UK-Norther  | 2 | 5 | #####    | ##### |  |
| 38 | 1 UK | 2020-13 | 2 UK-Norther  | 3 | 1 | 1.909991 | ##### |  |
| 39 | 1 UK | 2020-13 | 2 UK-Norther  | 3 | 2 | 2.333333 | ##### |  |
| 40 | 1 UK | 2020-13 | 2 UK-Norther  | 3 | 3 | 1.857143 | ##### |  |
| 41 | 1 UK | 2020-13 | 2 UK-Norther  | 3 | 4 | 2.333333 | ##### |  |
| 42 | 1 UK | 2020-13 | 2 UK-Norther  | 3 | 5 | 1.2      | ##### |  |
| 43 | 1 UK | 2020-13 | 2 UK-Overall  | 1 | 1 | 1.680198 | ##### |  |
| 44 | 1 UK | 2020-13 | 2 UK-Overall  | 1 | 2 | 2.231076 | ##### |  |
| 45 | 1 UK | 2020-13 | 2 UK-Overall  | 1 | 3 | 1.919927 | ##### |  |
| 46 | 1 UK | 2020-13 | 2 UK-Overall  | 1 | 4 | 1.526819 | ##### |  |
| 47 | 1 UK | 2020-13 | 2 UK-Overall  | 1 | 5 | 1.118181 | ##### |  |
| 48 | 1 UK | 2020-13 | 2 UK-Overall  | 2 | 1 | 1.780049 | ##### |  |
| 49 | 1 UK | 2020-13 | 2 UK-Overall  | 2 | 2 | 2.318675 | ##### |  |
| 50 | 1 UK | 2020-13 | 2 UK-Overall  | 2 | 3 | 2.175754 | ##### |  |
| 51 | 1 UK | 2020-13 | 2 UK-Overall  | 2 | 4 | 1.541497 | ##### |  |
| 52 | 1 UK | 2020-13 | 2 UK-Overall  | 2 | 5 | 1.102114 | ##### |  |
| 53 | 1 UK | 2020-13 | 2 UK-Overall  | 3 | 1 | 1.568251 | ##### |  |
| 54 | 1 UK | 2020-13 | 2 UK-Overall  | 3 | 2 | 2.113652 | ##### |  |
| 55 | 1 UK | 2020-13 | 2 UK-Overall  | 3 | 3 | 1.660278 | ##### |  |
| 56 | 1 UK | 2020-13 | 2 UK-Overall  | 3 | 4 | 1.510766 | ##### |  |
| 57 | 1 UK | 2020-13 | 2 UK-Overall  | 3 | 5 | 1.138665 | ##### |  |
| 58 | 1 UK | 2020-13 | 2 UK-Overall  | 3 | 5 | 1.138665 | ##### |  |
| 59 | 1 UK | 2020-13 | 2 UK-Scotland | 1 | 1 | 1.58762  | ##### |  |
| 60 | 1 UK | 2020-13 | 2 UK-Scotland | 1 | 1 | 1.58762  | ##### |  |

|    |      |         |              |   |   |          |       |  |
|----|------|---------|--------------|---|---|----------|-------|--|
| 1  |      |         |              |   |   |          |       |  |
| 2  |      |         |              |   |   |          |       |  |
| 3  | 1 UK | 2020-13 | 2 UK-Scotlan | 1 | 2 | 1.952273 | ##### |  |
| 4  | 1 UK | 2020-13 | 2 UK-Scotlan | 1 | 3 | 1.656352 | ##### |  |
| 5  | 1 UK | 2020-13 | 2 UK-Scotlan | 1 | 4 | 1.720488 | ##### |  |
| 6  | 1 UK | 2020-13 | 2 UK-Scotlan | 1 | 5 | 1.007842 | ##### |  |
| 7  | 1 UK | 2020-13 | 2 UK-Scotlan | 2 | 1 | 1.610838 | ##### |  |
| 8  | 1 UK | 2020-13 | 2 UK-Scotlan | 2 | 2 | 1.75     | ##### |  |
| 9  | 1 UK | 2020-13 | 2 UK-Scotlan | 2 | 3 | 1.909091 | ##### |  |
| 10 | 1 UK | 2020-13 | 2 UK-Scotlan | 2 | 4 | 1.668394 | ##### |  |
| 11 | 1 UK | 2020-13 | 2 UK-Scotlan | 2 | 5 | #####    | ##### |  |
| 12 | 1 UK | 2020-13 | 2 UK-Scotlan | 3 | 1 | 1.561198 | ##### |  |
| 13 | 1 UK | 2020-13 | 2 UK-Scotlan | 3 | 2 | 2.2      | ##### |  |
| 14 | 1 UK | 2020-13 | 2 UK-Scotlan | 3 | 3 | 1.396552 | ##### |  |
| 15 | 1 UK | 2020-13 | 2 UK-Scotlan | 3 | 4 | 1.783019 | ##### |  |
| 16 | 1 UK | 2020-13 | 2 UK-Scotlan | 3 | 5 | 1.193548 | ##### |  |
| 17 | 1 UK | 2020-13 | 2 UK-Wales   | 1 | 1 | 1.722599 | ##### |  |
| 18 | 1 UK | 2020-13 | 2 UK-Wales   | 1 | 2 | 2.146895 | ##### |  |
| 19 | 1 UK | 2020-13 | 2 UK-Wales   | 1 | 3 | 2.238938 | ##### |  |
| 20 | 1 UK | 2020-13 | 2 UK-Wales   | 1 | 4 | 1.559569 | ##### |  |
| 21 | 1 UK | 2020-13 | 2 UK-Wales   | 1 | 5 | 1.083289 | ##### |  |
| 22 | 1 UK | 2020-13 | 2 UK-Wales   | 2 | 1 | 1.733755 | ##### |  |
| 23 | 1 UK | 2020-13 | 2 UK-Wales   | 2 | 2 | 2.111111 | ##### |  |
| 24 | 1 UK | 2020-13 | 2 UK-Wales   | 2 | 3 | 2.347368 | ##### |  |
| 25 | 1 UK | 2020-13 | 2 UK-Wales   | 2 | 4 | 1.50303  | ##### |  |
| 26 | 1 UK | 2020-13 | 2 UK-Wales   | 2 | 5 | 1.112245 | ##### |  |
| 27 | 1 UK | 2020-13 | 2 UK-Wales   | 3 | 1 | 1.709211 | ##### |  |
| 28 | 1 UK | 2020-13 | 2 UK-Wales   | 3 | 2 | 2.166667 | ##### |  |
| 29 | 1 UK | 2020-13 | 2 UK-Wales   | 3 | 3 | 2.083333 | ##### |  |
| 30 | 1 UK | 2020-13 | 2 UK-Wales   | 3 | 4 | 1.623377 | ##### |  |
| 31 | 1 UK | 2020-13 | 2 UK-Wales   | 3 | 5 | 1.041667 | ##### |  |
| 32 | 1 UK | 2020-13 | 3 UK-Englan  | 1 | 1 | #####    | ##### |  |
| 33 | 1 UK | 2020-13 | 3 UK-Englan  | 1 | 2 | 0        | 0     |  |
| 34 | 1 UK | 2020-13 | 3 UK-Englan  | 1 | 3 | #####    | ##### |  |
| 35 | 1 UK | 2020-13 | 3 UK-Englan  | 1 | 4 | #####    | ##### |  |
| 36 | 1 UK | 2020-13 | 3 UK-Englan  | 1 | 5 | #####    | ##### |  |
| 37 | 1 UK | 2020-13 | 3 UK-Englan  | 2 | 1 | #####    | ##### |  |
| 38 | 1 UK | 2020-13 | 3 UK-Englan  | 2 | 2 | 0        | 0     |  |
| 39 | 1 UK | 2020-13 | 3 UK-Englan  | 2 | 3 | #####    | ##### |  |
| 40 | 1 UK | 2020-13 | 3 UK-Englan  | 2 | 4 | #####    | ##### |  |
| 41 | 1 UK | 2020-13 | 3 UK-Englan  | 2 | 5 | #####    | ##### |  |
| 42 | 1 UK | 2020-13 | 3 UK-Englan  | 3 | 1 | #####    | ##### |  |
| 43 | 1 UK | 2020-13 | 3 UK-Englan  | 3 | 2 | 0        | 0     |  |
| 44 | 1 UK | 2020-13 | 3 UK-Englan  | 3 | 3 | #####    | ##### |  |
| 45 | 1 UK | 2020-13 | 3 UK-Englan  | 3 | 4 | #####    | ##### |  |
| 46 | 1 UK | 2020-13 | 3 UK-Englan  | 3 | 5 | 0        | 0     |  |
| 47 | 1 UK | 2020-13 | 3 UK-London  | 1 | 1 | #####    | ##### |  |
| 48 | 1 UK | 2020-13 | 3 UK-London  | 1 | 2 | 0        | 0     |  |
| 49 | 1 UK | 2020-13 | 3 UK-London  | 1 | 3 | #####    | ##### |  |
| 50 | 1 UK | 2020-13 | 3 UK-London  | 1 | 4 | #####    | ##### |  |
| 51 | 1 UK | 2020-13 | 3 UK-London  | 1 | 5 | #####    | ##### |  |
| 52 | 1 UK | 2020-13 | 3 UK-London  | 2 | 1 | #####    | ##### |  |
| 53 | 1 UK | 2020-13 | 3 UK-London  | 2 | 2 | 0        | 0     |  |
| 54 | 1 UK | 2020-13 | 3 UK-London  | 2 | 3 | #####    | ##### |  |
| 55 | 1 UK | 2020-13 | 3 UK-London  | 2 | 4 | #####    | ##### |  |
| 56 | 1 UK | 2020-13 | 3 UK-London  | 2 | 5 | #####    | ##### |  |
| 57 | 1 UK | 2020-13 | 3 UK-London  | 3 | 1 | #####    | ##### |  |
| 58 | 1 UK | 2020-13 | 3 UK-London  | 3 | 2 | 0        | 0     |  |
| 59 | 1 UK | 2020-13 | 3 UK-London  | 3 | 3 | #####    | ##### |  |
| 60 | 1 UK | 2020-13 | 3 UK-London  | 3 | 4 | 0        | 0     |  |



|    |      |         |              |   |   |       |       |  |
|----|------|---------|--------------|---|---|-------|-------|--|
| 1  |      |         |              |   |   |       |       |  |
| 2  |      |         |              |   |   |       |       |  |
| 3  | 1 UK | 2020-13 | 3 UK-London  | 3 | 3 | ##### | ##### |  |
| 4  | 1 UK | 2020-13 | 3 UK-London  | 3 | 4 | 0     | 0     |  |
| 5  | 1 UK | 2020-13 | 3 UK-London  | 3 | 5 | ##### | ##### |  |
| 6  | 1 UK | 2020-13 | 3 UK-Norther | 1 | 1 | ##### | ##### |  |
| 7  | 1 UK | 2020-13 | 3 UK-Norther | 1 | 2 | 0     | 0     |  |
| 8  | 1 UK | 2020-13 | 3 UK-Norther | 1 | 3 | 0     | 0     |  |
| 9  | 1 UK | 2020-13 | 3 UK-Norther | 1 | 4 | ##### | ##### |  |
| 10 | 1 UK | 2020-13 | 3 UK-Norther | 1 | 5 | 0     | 0     |  |
| 11 | 1 UK | 2020-13 | 3 UK-Norther | 2 | 1 | ##### | ##### |  |
| 12 | 1 UK | 2020-13 | 3 UK-Norther | 2 | 2 | 0     | 0     |  |
| 13 | 1 UK | 2020-13 | 3 UK-Norther | 2 | 3 | 0     | 0     |  |
| 14 | 1 UK | 2020-13 | 3 UK-Norther | 2 | 4 | ##### | ##### |  |
| 15 | 1 UK | 2020-13 | 3 UK-Norther | 2 | 5 | 0     | 0     |  |
| 16 | 1 UK | 2020-13 | 3 UK-Norther | 3 | 1 | ##### | ##### |  |
| 17 | 1 UK | 2020-13 | 3 UK-Norther | 3 | 2 | 0     | 0     |  |
| 18 | 1 UK | 2020-13 | 3 UK-Norther | 3 | 3 | 0     | 0     |  |
| 19 | 1 UK | 2020-13 | 3 UK-Norther | 3 | 4 | ##### | ##### |  |
| 20 | 1 UK | 2020-13 | 3 UK-Norther | 3 | 5 | 0     | 0     |  |
| 21 | 1 UK | 2020-13 | 3 UK-Overall | 1 | 1 | ##### | ##### |  |
| 22 | 1 UK | 2020-13 | 3 UK-Overall | 1 | 2 | 0     | 0     |  |
| 23 | 1 UK | 2020-13 | 3 UK-Overall | 1 | 3 | ##### | ##### |  |
| 24 | 1 UK | 2020-13 | 3 UK-Overall | 1 | 4 | ##### | ##### |  |
| 25 | 1 UK | 2020-13 | 3 UK-Overall | 1 | 5 | ##### | ##### |  |
| 26 | 1 UK | 2020-13 | 3 UK-Overall | 2 | 1 | ##### | ##### |  |
| 27 | 1 UK | 2020-13 | 3 UK-Overall | 2 | 2 | 0     | 0     |  |
| 28 | 1 UK | 2020-13 | 3 UK-Overall | 2 | 3 | ##### | ##### |  |
| 29 | 1 UK | 2020-13 | 3 UK-Overall | 2 | 4 | ##### | ##### |  |
| 30 | 1 UK | 2020-13 | 3 UK-Overall | 2 | 5 | ##### | ##### |  |
| 31 | 1 UK | 2020-13 | 3 UK-Overall | 3 | 1 | ##### | ##### |  |
| 32 | 1 UK | 2020-13 | 3 UK-Overall | 3 | 2 | 0     | 0     |  |
| 33 | 1 UK | 2020-13 | 3 UK-Overall | 3 | 3 | ##### | ##### |  |
| 34 | 1 UK | 2020-13 | 3 UK-Overall | 3 | 4 | ##### | ##### |  |
| 35 | 1 UK | 2020-13 | 3 UK-Overall | 3 | 5 | ##### | ##### |  |
| 36 | 1 UK | 2020-13 | 3 UK-Overall | 3 | 5 | ##### | ##### |  |
| 37 | 1 UK | 2020-13 | 3 UK-Scotlan | 1 | 1 | ##### | ##### |  |
| 38 | 1 UK | 2020-13 | 3 UK-Scotlan | 1 | 2 | 0     | 0     |  |
| 39 | 1 UK | 2020-13 | 3 UK-Scotlan | 1 | 3 | ##### | ##### |  |
| 40 | 1 UK | 2020-13 | 3 UK-Scotlan | 1 | 4 | ##### | ##### |  |
| 41 | 1 UK | 2020-13 | 3 UK-Scotlan | 1 | 5 | ##### | ##### |  |
| 42 | 1 UK | 2020-13 | 3 UK-Scotlan | 2 | 1 | ##### | ##### |  |
| 43 | 1 UK | 2020-13 | 3 UK-Scotlan | 2 | 2 | 0     | 0     |  |
| 44 | 1 UK | 2020-13 | 3 UK-Scotlan | 2 | 3 | 0     | 0     |  |
| 45 | 1 UK | 2020-13 | 3 UK-Scotlan | 2 | 4 | 0     | 0     |  |
| 46 | 1 UK | 2020-13 | 3 UK-Scotlan | 2 | 5 | ##### | ##### |  |
| 47 | 1 UK | 2020-13 | 3 UK-Scotlan | 3 | 1 | ##### | ##### |  |
| 48 | 1 UK | 2020-13 | 3 UK-Scotlan | 3 | 2 | 0     | 0     |  |
| 49 | 1 UK | 2020-13 | 3 UK-Scotlan | 3 | 3 | ##### | ##### |  |
| 50 | 1 UK | 2020-13 | 3 UK-Scotlan | 3 | 4 | ##### | ##### |  |
| 51 | 1 UK | 2020-13 | 3 UK-Scotlan | 3 | 5 | 0     | 0     |  |
| 52 | 1 UK | 2020-13 | 3 UK-Wales   | 1 | 1 | ##### | ##### |  |
| 53 | 1 UK | 2020-13 | 3 UK-Wales   | 1 | 2 | 0     | 0     |  |
| 54 | 1 UK | 2020-13 | 3 UK-Wales   | 1 | 3 | ##### | ##### |  |
| 55 | 1 UK | 2020-13 | 3 UK-Wales   | 1 | 4 | ##### | ##### |  |
| 56 | 1 UK | 2020-13 | 3 UK-Wales   | 1 | 5 | ##### | ##### |  |
| 57 | 1 UK | 2020-13 | 3 UK-Wales   | 2 | 1 | ##### | ##### |  |
| 58 | 1 UK | 2020-13 | 3 UK-Wales   | 2 | 2 | 0     | 0     |  |
| 59 | 1 UK | 2020-13 | 3 UK-Wales   | 2 | 3 | 0     | 0     |  |
| 60 | 1 UK | 2020-13 | 3 UK-Wales   | 2 | 3 | 0     | 0     |  |

|    |      |         |              |   |   |          |          |  |
|----|------|---------|--------------|---|---|----------|----------|--|
| 1  |      |         |              |   |   |          |          |  |
| 2  |      |         |              |   |   |          |          |  |
| 3  | 1 UK | 2020-13 | 3 UK-Wales   | 2 | 4 | #####    | #####    |  |
| 4  | 1 UK | 2020-13 | 3 UK-Wales   | 2 | 5 | #####    | #####    |  |
| 5  | 1 UK | 2020-13 | 3 UK-Wales   | 3 | 1 | #####    | #####    |  |
| 6  | 1 UK | 2020-13 | 3 UK-Wales   | 3 | 2 | 0        | 0        |  |
| 7  | 1 UK | 2020-13 | 3 UK-Wales   | 3 | 3 | #####    | #####    |  |
| 8  | 1 UK | 2020-13 | 3 UK-Wales   | 3 | 4 | #####    | #####    |  |
| 9  | 1 UK | 2020-13 | 3 UK-Wales   | 3 | 5 | 0        | 0        |  |
| 10 | 1 UK | 2020-13 | 4 UK-England | 1 | 1 | 1.2455   | #####    |  |
| 11 | 1 UK | 2020-13 | 4 UK-England | 1 | 2 | 2.111543 | #####    |  |
| 12 | 1 UK | 2020-13 | 4 UK-England | 1 | 3 | 1.74449  | #####    |  |
| 13 | 1 UK | 2020-13 | 4 UK-England | 1 | 4 | 1.095591 | #####    |  |
| 14 | 1 UK | 2020-13 | 4 UK-England | 1 | 5 | #####    | #####    |  |
| 15 | 1 UK | 2020-13 | 4 UK-England | 2 | 1 | 1.002495 | #####    |  |
| 16 | 1 UK | 2020-13 | 4 UK-England | 2 | 2 | 1.728571 | #####    |  |
| 17 | 1 UK | 2020-13 | 4 UK-England | 2 | 3 | 1.265918 | #####    |  |
| 18 | 1 UK | 2020-13 | 4 UK-England | 2 | 4 | 1.066826 | #####    |  |
| 19 | 1 UK | 2020-13 | 4 UK-England | 2 | 5 | #####    | #####    |  |
| 20 | 1 UK | 2020-13 | 4 UK-England | 3 | 1 | 1.51468  | #####    |  |
| 21 | 1 UK | 2020-13 | 4 UK-England | 3 | 2 | 2.736842 | 1.2911   |  |
| 22 | 1 UK | 2020-13 | 4 UK-England | 3 | 3 | 2.209091 | #####    |  |
| 23 | 1 UK | 2020-13 | 4 UK-England | 3 | 4 | 1.125581 | #####    |  |
| 24 | 1 UK | 2020-13 | 4 UK-England | 3 | 5 | #####    | #####    |  |
| 25 | 1 UK | 2020-13 | 4 UK-London  | 1 | 1 | #####    | #####    |  |
| 26 | 1 UK | 2020-13 | 4 UK-London  | 1 | 2 | #####    | #####    |  |
| 27 | 1 UK | 2020-13 | 4 UK-London  | 1 | 3 | #####    | #####    |  |
| 28 | 1 UK | 2020-13 | 4 UK-London  | 1 | 4 | #####    | #####    |  |
| 29 | 1 UK | 2020-13 | 4 UK-London  | 1 | 5 | 0        | 0        |  |
| 30 | 1 UK | 2020-13 | 4 UK-London  | 2 | 1 | #####    | #####    |  |
| 31 | 1 UK | 2020-13 | 4 UK-London  | 2 | 2 | #####    | #####    |  |
| 32 | 1 UK | 2020-13 | 4 UK-London  | 2 | 3 | 1.041667 | #####    |  |
| 33 | 1 UK | 2020-13 | 4 UK-London  | 2 | 4 | #####    | #####    |  |
| 34 | 1 UK | 2020-13 | 4 UK-London  | 2 | 5 | 0        | 0        |  |
| 35 | 1 UK | 2020-13 | 4 UK-London  | 3 | 1 | #####    | #####    |  |
| 36 | 1 UK | 2020-13 | 4 UK-London  | 3 | 2 | 0        | 0        |  |
| 37 | 1 UK | 2020-13 | 4 UK-London  | 3 | 3 | 0.72     | #####    |  |
| 38 | 1 UK | 2020-13 | 4 UK-London  | 3 | 4 | 0.796875 | #####    |  |
| 39 | 1 UK | 2020-13 | 4 UK-London  | 3 | 5 | 0        | 0        |  |
| 40 | 1 UK | 2020-13 | 4 UK-Norther | 1 | 1 | 1.294253 | #####    |  |
| 41 | 1 UK | 2020-13 | 4 UK-Norther | 1 | 2 | 2.645393 | 1.606476 |  |
| 42 | 1 UK | 2020-13 | 4 UK-Norther | 1 | 3 | 1.095807 | #####    |  |
| 43 | 1 UK | 2020-13 | 4 UK-Norther | 1 | 4 | 1.625279 | #####    |  |
| 44 | 1 UK | 2020-13 | 4 UK-Norther | 1 | 5 | #####    | #####    |  |
| 45 | 1 UK | 2020-13 | 4 UK-Norther | 2 | 1 | 1.833305 | #####    |  |
| 46 | 1 UK | 2020-13 | 4 UK-Norther | 2 | 2 | 3.666667 | 2.120008 |  |
| 47 | 1 UK | 2020-13 | 4 UK-Norther | 2 | 3 | 1.910714 | #####    |  |
| 48 | 1 UK | 2020-13 | 4 UK-Norther | 2 | 4 | 1.597826 | #####    |  |
| 49 | 1 UK | 2020-13 | 4 UK-Norther | 2 | 5 | #####    | #####    |  |
| 50 | 1 UK | 2020-13 | 4 UK-Norther | 3 | 1 | #####    | #####    |  |
| 51 | 1 UK | 2020-13 | 4 UK-Norther | 3 | 2 | 0        | 0        |  |
| 52 | 1 UK | 2020-13 | 4 UK-Norther | 3 | 3 | 0        | 0        |  |
| 53 | 1 UK | 2020-13 | 4 UK-Norther | 3 | 4 | 1.666667 | #####    |  |
| 54 | 1 UK | 2020-13 | 4 UK-Norther | 3 | 5 | 0        | 0        |  |
| 55 | 1 UK | 2020-13 | 4 UK-Overall | 1 | 1 | 1.141997 | #####    |  |
| 56 | 1 UK | 2020-13 | 4 UK-Overall | 1 | 2 | 1.702065 | #####    |  |
| 57 | 1 UK | 2020-13 | 4 UK-Overall | 1 | 3 | 1.58232  | #####    |  |
| 58 | 1 UK | 2020-13 | 4 UK-Overall | 1 | 4 | 1.065087 | #####    |  |
| 59 | 1 UK | 2020-13 | 4 UK-Overall | 1 | 5 | #####    | #####    |  |
| 60 | 1 UK | 2020-13 | 4 UK-Overall | 1 | 6 | #####    | #####    |  |

|    |      |         |              |   |   |          |          |  |
|----|------|---------|--------------|---|---|----------|----------|--|
| 1  |      |         |              |   |   |          |          |  |
| 2  |      |         |              |   |   |          |          |  |
| 3  | 1 UK | 2020-13 | 4 UK-Overall | 1 | 5 | #####    | #####    |  |
| 4  | 1 UK | 2020-13 | 4 UK-Overall | 2 | 1 | #####    | #####    |  |
| 5  | 1 UK | 2020-13 | 4 UK-Overall | 2 | 2 | 1.492899 | #####    |  |
| 6  | 1 UK | 2020-13 | 4 UK-Overall | 2 | 3 | 1.235199 | #####    |  |
| 7  | 1 UK | 2020-13 | 4 UK-Overall | 2 | 4 | 1.006804 | #####    |  |
| 8  | 1 UK | 2020-13 | 4 UK-Overall | 2 | 5 | #####    | #####    |  |
| 9  | 1 UK | 2020-13 | 4 UK-Overall | 3 | 1 | 1.355633 | #####    |  |
| 10 | 1 UK | 2020-13 | 4 UK-Overall | 3 | 2 | 2.000822 | #####    |  |
| 11 | 1 UK | 2020-13 | 4 UK-Overall | 3 | 3 | 1.948425 | #####    |  |
| 12 | 1 UK | 2020-13 | 4 UK-Overall | 3 | 4 | 1.128081 | #####    |  |
| 13 | 1 UK | 2020-13 | 4 UK-Overall | 3 | 5 | #####    | #####    |  |
| 14 | 1 UK | 2020-13 | 4 UK-Scotlan | 1 | 1 | 1.299764 | #####    |  |
| 15 | 1 UK | 2020-13 | 4 UK-Scotlan | 1 | 2 | 1.902604 | 1.234947 |  |
| 16 | 1 UK | 2020-13 | 4 UK-Scotlan | 1 | 3 | 1.702497 | #####    |  |
| 17 | 1 UK | 2020-13 | 4 UK-Scotlan | 1 | 4 | 1.365915 | #####    |  |
| 18 | 1 UK | 2020-13 | 4 UK-Scotlan | 1 | 5 | #####    | #####    |  |
| 19 | 1 UK | 2020-13 | 4 UK-Scotlan | 2 | 1 | #####    | #####    |  |
| 20 | 1 UK | 2020-13 | 4 UK-Scotlan | 2 | 2 | #####    | #####    |  |
| 21 | 1 UK | 2020-13 | 4 UK-Scotlan | 2 | 3 | 1.23913  | #####    |  |
| 22 | 1 UK | 2020-13 | 4 UK-Scotlan | 2 | 4 | 1.344086 | #####    |  |
| 23 | 1 UK | 2020-13 | 4 UK-Scotlan | 2 | 5 | #####    | #####    |  |
| 24 | 1 UK | 2020-13 | 4 UK-Scotlan | 3 | 1 | 1.717278 | #####    |  |
| 25 | 1 UK | 2020-13 | 4 UK-Scotlan | 3 | 2 | 4.375    | 2.855765 |  |
| 26 | 1 UK | 2020-13 | 4 UK-Scotlan | 3 | 3 | 2.178571 | #####    |  |
| 27 | 1 UK | 2020-13 | 4 UK-Scotlan | 3 | 4 | 1.392157 | #####    |  |
| 28 | 1 UK | 2020-13 | 4 UK-Scotlan | 3 | 5 | #####    | #####    |  |
| 29 | 1 UK | 2020-13 | 4 UK-Scotlan | 3 | 5 | #####    | #####    |  |
| 30 | 1 UK | 2020-13 | 4 UK-Wales   | 1 | 1 | #####    | #####    |  |
| 31 | 1 UK | 2020-13 | 4 UK-Wales   | 1 | 2 | #####    | #####    |  |
| 32 | 1 UK | 2020-13 | 4 UK-Wales   | 1 | 3 | 1.621753 | #####    |  |
| 33 | 1 UK | 2020-13 | 4 UK-Wales   | 1 | 4 | 1.124531 | #####    |  |
| 34 | 1 UK | 2020-13 | 4 UK-Wales   | 1 | 5 | #####    | #####    |  |
| 35 | 1 UK | 2020-13 | 4 UK-Wales   | 2 | 1 | #####    | #####    |  |
| 36 | 1 UK | 2020-13 | 4 UK-Wales   | 2 | 2 | 0.875    | #####    |  |
| 37 | 1 UK | 2020-13 | 4 UK-Wales   | 2 | 3 | 1.054945 | #####    |  |
| 38 | 1 UK | 2020-13 | 4 UK-Wales   | 2 | 4 | #####    | #####    |  |
| 39 | 1 UK | 2020-13 | 4 UK-Wales   | 2 | 5 | #####    | #####    |  |
| 40 | 1 UK | 2020-13 | 4 UK-Wales   | 3 | 1 | 1.144867 | #####    |  |
| 41 | 1 UK | 2020-13 | 4 UK-Wales   | 3 | 2 | 0        | 0        |  |
| 42 | 1 UK | 2020-13 | 4 UK-Wales   | 3 | 3 | 2.434783 | 1.204713 |  |
| 43 | 1 UK | 2020-13 | 4 UK-Wales   | 3 | 4 | 1.310811 | #####    |  |
| 44 | 1 UK | 2020-13 | 4 UK-Wales   | 3 | 5 | 0        | 0        |  |
| 45 | 1 UK | 2020-13 | 5 UK-Englan  | 1 | 1 | #####    | #####    |  |
| 46 | 1 UK | 2020-13 | 5 UK-Englan  | 1 | 2 | #####    | #####    |  |
| 47 | 1 UK | 2020-13 | 5 UK-Englan  | 1 | 3 | 1.047153 | #####    |  |
| 48 | 1 UK | 2020-13 | 5 UK-Englan  | 1 | 4 | 1.020935 | #####    |  |
| 49 | 1 UK | 2020-13 | 5 UK-Englan  | 1 | 5 | #####    | #####    |  |
| 50 | 1 UK | 2020-13 | 5 UK-Englan  | 2 | 1 | #####    | #####    |  |
| 51 | 1 UK | 2020-13 | 5 UK-Englan  | 2 | 2 | 0.8      | #####    |  |
| 52 | 1 UK | 2020-13 | 5 UK-Englan  | 2 | 3 | 1.051471 | #####    |  |
| 53 | 1 UK | 2020-13 | 5 UK-Englan  | 2 | 4 | #####    | #####    |  |
| 54 | 1 UK | 2020-13 | 5 UK-Englan  | 2 | 5 | #####    | #####    |  |
| 55 | 1 UK | 2020-13 | 5 UK-Englan  | 3 | 1 | #####    | #####    |  |
| 56 | 1 UK | 2020-13 | 5 UK-Englan  | 3 | 2 | #####    | #####    |  |
| 57 | 1 UK | 2020-13 | 5 UK-Englan  | 3 | 3 | 1.043103 | #####    |  |
| 58 | 1 UK | 2020-13 | 5 UK-Englan  | 3 | 4 | 1.045249 | #####    |  |
| 59 | 1 UK | 2020-13 | 5 UK-Englan  | 3 | 5 | #####    | #####    |  |
| 60 | 1 UK | 2020-13 | 5 UK-Englan  | 3 | 5 | #####    | #####    |  |

|    |      |         |              |   |   |          |          |
|----|------|---------|--------------|---|---|----------|----------|
| 1  |      |         |              |   |   |          |          |
| 2  |      |         |              |   |   |          |          |
| 3  | 1 UK | 2020-13 | 5 UK-London  | 1 | 1 | #####    | #####    |
| 4  | 1 UK | 2020-13 | 5 UK-London  | 1 | 2 | #####    | #####    |
| 5  | 1 UK | 2020-13 | 5 UK-London  | 1 | 3 | #####    | #####    |
| 6  | 1 UK | 2020-13 | 5 UK-London  | 1 | 4 | 1.124803 | #####    |
| 7  | 1 UK | 2020-13 | 5 UK-London  | 1 | 5 | 1.51852  | #####    |
| 8  | 1 UK | 2020-13 | 5 UK-London  | 2 | 1 | 1.090738 | #####    |
| 9  | 1 UK | 2020-13 | 5 UK-London  | 2 | 2 | #####    | #####    |
| 10 | 1 UK | 2020-13 | 5 UK-London  | 2 | 3 | 1.138889 | #####    |
| 11 | 1 UK | 2020-13 | 5 UK-London  | 2 | 4 | 1.083333 | #####    |
| 12 | 1 UK | 2020-13 | 5 UK-London  | 2 | 5 | 1.408163 | #####    |
| 13 | 1 UK | 2020-13 | 5 UK-London  | 3 | 1 | #####    | #####    |
| 14 | 1 UK | 2020-13 | 5 UK-London  | 3 | 2 | #####    | #####    |
| 15 | 1 UK | 2020-13 | 5 UK-London  | 3 | 3 | #####    | #####    |
| 16 | 1 UK | 2020-13 | 5 UK-London  | 3 | 4 | 1.171875 | #####    |
| 17 | 1 UK | 2020-13 | 5 UK-London  | 3 | 5 | 1.678571 | #####    |
| 18 | 1 UK | 2020-13 | 5 UK-Norther | 1 | 1 | 1.31762  | #####    |
| 19 | 1 UK | 2020-13 | 5 UK-Norther | 1 | 2 | 1.050719 | #####    |
| 20 | 1 UK | 2020-13 | 5 UK-Norther | 1 | 3 | 1.02003  | #####    |
| 21 | 1 UK | 2020-13 | 5 UK-Norther | 1 | 4 | 1.736847 | #####    |
| 22 | 1 UK | 2020-13 | 5 UK-Norther | 1 | 5 | 1.471325 | #####    |
| 23 | 1 UK | 2020-13 | 5 UK-Norther | 2 | 1 | #####    | #####    |
| 24 | 1 UK | 2020-13 | 5 UK-Norther | 2 | 2 | #####    | #####    |
| 25 | 1 UK | 2020-13 | 5 UK-Norther | 2 | 3 | 1.036364 | #####    |
| 26 | 1 UK | 2020-13 | 5 UK-Norther | 2 | 4 | 1.273684 | #####    |
| 27 | 1 UK | 2020-13 | 5 UK-Norther | 2 | 5 | 0.6      | #####    |
| 28 | 1 UK | 2020-13 | 5 UK-Norther | 3 | 1 | 1.854799 | #####    |
| 29 | 1 UK | 2020-13 | 5 UK-Norther | 3 | 2 | 2.333333 | 1.186422 |
| 30 | 1 UK | 2020-13 | 5 UK-Norther | 3 | 3 | 1        | #####    |
| 31 | 1 UK | 2020-13 | 5 UK-Norther | 3 | 4 | 2.482759 | #####    |
| 32 | 1 UK | 2020-13 | 5 UK-Norther | 3 | 5 | 2.5      | 1.09209  |
| 33 | 1 UK | 2020-13 | 5 UK-Overall | 1 | 1 | #####    | #####    |
| 34 | 1 UK | 2020-13 | 5 UK-Overall | 1 | 2 | #####    | #####    |
| 35 | 1 UK | 2020-13 | 5 UK-Overall | 1 | 3 | 1.017675 | #####    |
| 36 | 1 UK | 2020-13 | 5 UK-Overall | 1 | 4 | 1.059871 | #####    |
| 37 | 1 UK | 2020-13 | 5 UK-Overall | 1 | 5 | #####    | #####    |
| 38 | 1 UK | 2020-13 | 5 UK-Overall | 2 | 1 | #####    | #####    |
| 39 | 1 UK | 2020-13 | 5 UK-Overall | 2 | 2 | #####    | #####    |
| 40 | 1 UK | 2020-13 | 5 UK-Overall | 2 | 3 | 1.030073 | #####    |
| 41 | 1 UK | 2020-13 | 5 UK-Overall | 2 | 4 | #####    | #####    |
| 42 | 1 UK | 2020-13 | 5 UK-Overall | 2 | 5 | #####    | #####    |
| 43 | 1 UK | 2020-13 | 5 UK-Overall | 3 | 1 | #####    | #####    |
| 44 | 1 UK | 2020-13 | 5 UK-Overall | 3 | 2 | #####    | #####    |
| 45 | 1 UK | 2020-13 | 5 UK-Overall | 3 | 3 | 1.005027 | #####    |
| 46 | 1 UK | 2020-13 | 5 UK-Overall | 3 | 4 | 1.128951 | #####    |
| 47 | 1 UK | 2020-13 | 5 UK-Overall | 3 | 5 | 1.040414 | #####    |
| 48 | 1 UK | 2020-13 | 5 UK-Scotlan | 1 | 1 | #####    | #####    |
| 49 | 1 UK | 2020-13 | 5 UK-Scotlan | 1 | 2 | #####    | #####    |
| 50 | 1 UK | 2020-13 | 5 UK-Scotlan | 1 | 3 | 1.07929  | #####    |
| 51 | 1 UK | 2020-13 | 5 UK-Scotlan | 1 | 4 | 1.214915 | #####    |
| 52 | 1 UK | 2020-13 | 5 UK-Scotlan | 1 | 5 | #####    | #####    |
| 53 | 1 UK | 2020-13 | 5 UK-Scotlan | 2 | 1 | #####    | #####    |
| 54 | 1 UK | 2020-13 | 5 UK-Scotlan | 2 | 2 | #####    | #####    |
| 55 | 1 UK | 2020-13 | 5 UK-Scotlan | 2 | 3 | #####    | #####    |
| 56 | 1 UK | 2020-13 | 5 UK-Scotlan | 2 | 4 | #####    | #####    |
| 57 | 1 UK | 2020-13 | 5 UK-Scotlan | 2 | 5 | #####    | #####    |
| 58 | 1 UK | 2020-13 | 5 UK-Scotlan | 2 | 1 | 1.235807 | #####    |
| 59 | 1 UK | 2020-13 | 5 UK-Scotlan | 3 |   |          |          |
| 60 | 1 UK | 2020-13 | 5 UK-Scotlan | 3 |   |          |          |

|    |      |         |              |   |   |          |          |  |
|----|------|---------|--------------|---|---|----------|----------|--|
| 1  |      |         |              |   |   |          |          |  |
| 2  |      |         |              |   |   |          |          |  |
| 3  | 1 UK | 2020-13 | 5 UK-Scotlan | 3 | 2 | 0.2      | #####    |  |
| 4  | 1 UK | 2020-13 | 5 UK-Scotlan | 3 | 3 | 1.362069 | #####    |  |
| 5  | 1 UK | 2020-13 | 5 UK-Scotlan | 3 | 4 | 1.625    | #####    |  |
| 6  | 1 UK | 2020-13 | 5 UK-Scotlan | 3 | 5 | #####    | #####    |  |
| 7  | 1 UK | 2020-13 | 5 UK-Wales   | 1 | 1 | #####    | #####    |  |
| 8  | 1 UK | 2020-13 | 5 UK-Wales   | 1 | 2 | #####    | #####    |  |
| 9  | 1 UK | 2020-13 | 5 UK-Wales   | 1 | 3 | #####    | #####    |  |
| 10 | 1 UK | 2020-13 | 5 UK-Wales   | 1 | 4 | #####    | #####    |  |
| 11 | 1 UK | 2020-13 | 5 UK-Wales   | 1 | 5 | #####    | #####    |  |
| 12 | 1 UK | 2020-13 | 5 UK-Wales   | 2 | 1 | #####    | #####    |  |
| 13 | 1 UK | 2020-13 | 5 UK-Wales   | 2 | 2 | #####    | #####    |  |
| 14 | 1 UK | 2020-13 | 5 UK-Wales   | 2 | 3 | #####    | #####    |  |
| 15 | 1 UK | 2020-13 | 5 UK-Wales   | 2 | 4 | #####    | #####    |  |
| 16 | 1 UK | 2020-13 | 5 UK-Wales   | 2 | 5 | #####    | #####    |  |
| 17 | 1 UK | 2020-13 | 5 UK-Wales   | 3 | 1 | #####    | #####    |  |
| 18 | 1 UK | 2020-13 | 5 UK-Wales   | 3 | 2 | #####    | #####    |  |
| 19 | 1 UK | 2020-13 | 5 UK-Wales   | 3 | 3 | 1.125    | #####    |  |
| 20 | 1 UK | 2020-13 | 5 UK-Wales   | 3 | 4 | #####    | #####    |  |
| 21 | 1 UK | 2020-13 | 5 UK-Wales   | 3 | 5 | #####    | #####    |  |
| 22 | 1 UK | 2020-13 | 5 UK-Wales   | 3 | 5 | #####    | #####    |  |
| 23 | 1 UK | 2020-14 | 1 UK-Englan  | 1 | 1 | 3.057655 | #####    |  |
| 24 | 1 UK | 2020-14 | 1 UK-Englan  | 1 | 2 | 3.812797 | #####    |  |
| 25 | 1 UK | 2020-14 | 1 UK-Englan  | 1 | 3 | 3.610943 | #####    |  |
| 26 | 1 UK | 2020-14 | 1 UK-Englan  | 1 | 4 | 3.038328 | #####    |  |
| 27 | 1 UK | 2020-14 | 1 UK-Englan  | 1 | 5 | 1.91867  | #####    |  |
| 28 | 1 UK | 2020-14 | 1 UK-Englan  | 2 | 1 | 3.114924 | #####    |  |
| 29 | 1 UK | 2020-14 | 1 UK-Englan  | 2 | 2 | 3.472222 | #####    |  |
| 30 | 1 UK | 2020-14 | 1 UK-Englan  | 2 | 3 | 3.72973  | #####    |  |
| 31 | 1 UK | 2020-14 | 1 UK-Englan  | 2 | 4 | 3.055866 | #####    |  |
| 32 | 1 UK | 2020-14 | 1 UK-Englan  | 2 | 5 | 2.052174 | #####    |  |
| 33 | 1 UK | 2020-14 | 1 UK-Englan  | 3 | 1 | 2.986491 | #####    |  |
| 34 | 1 UK | 2020-14 | 1 UK-Englan  | 3 | 2 | 4.230769 | 1.643292 |  |
| 35 | 1 UK | 2020-14 | 1 UK-Englan  | 3 | 3 | 3.4      | #####    |  |
| 36 | 1 UK | 2020-14 | 1 UK-Englan  | 3 | 4 | 3.020833 | #####    |  |
| 37 | 1 UK | 2020-14 | 1 UK-Englan  | 3 | 5 | 1.768293 | #####    |  |
| 38 | 1 UK | 2020-14 | 1 UK-London  | 1 | 1 | 2.546604 | #####    |  |
| 39 | 1 UK | 2020-14 | 1 UK-London  | 1 | 2 | 2.83652  | 1.106494 |  |
| 40 | 1 UK | 2020-14 | 1 UK-London  | 1 | 3 | 1.690461 | #####    |  |
| 41 | 1 UK | 2020-14 | 1 UK-London  | 1 | 4 | 3.763979 | #####    |  |
| 42 | 1 UK | 2020-14 | 1 UK-London  | 1 | 5 | 1.788804 | #####    |  |
| 43 | 1 UK | 2020-14 | 1 UK-London  | 2 | 1 | 2.405842 | #####    |  |
| 44 | 1 UK | 2020-14 | 1 UK-London  | 2 | 2 | 3        | 1.62991  |  |
| 45 | 1 UK | 2020-14 | 1 UK-London  | 2 | 3 | 1.666667 | #####    |  |
| 46 | 1 UK | 2020-14 | 1 UK-London  | 2 | 4 | 3.380952 | 1.205654 |  |
| 47 | 1 UK | 2020-14 | 1 UK-London  | 2 | 5 | 1.733333 | #####    |  |
| 48 | 1 UK | 2020-14 | 1 UK-London  | 3 | 1 | 2.704286 | #####    |  |
| 49 | 1 UK | 2020-14 | 1 UK-London  | 3 | 2 | 2.5      | #####    |  |
| 50 | 1 UK | 2020-14 | 1 UK-London  | 3 | 3 | 1.714286 | #####    |  |
| 51 | 1 UK | 2020-14 | 1 UK-London  | 3 | 4 | 4.095238 | 1.038787 |  |
| 52 | 1 UK | 2020-14 | 1 UK-London  | 3 | 5 | 1.875    | 1.006881 |  |
| 53 | 1 UK | 2020-14 | 1 UK-Norther | 1 | 1 | 4.576612 | #####    |  |
| 54 | 1 UK | 2020-14 | 1 UK-Norther | 1 | 2 | 4.609935 | 1.361128 |  |
| 55 | 1 UK | 2020-14 | 1 UK-Norther | 1 | 3 | 6.401117 | 2.344724 |  |
| 56 | 1 UK | 2020-14 | 1 UK-Norther | 1 | 4 | 3.394129 | #####    |  |
| 57 | 1 UK | 2020-14 | 1 UK-Norther | 1 | 5 | 2.15618  | #####    |  |
| 58 | 1 UK | 2020-14 | 1 UK-Norther | 2 | 1 | 3.575432 | #####    |  |
| 59 | 1 UK | 2020-14 | 1 UK-Norther | 2 | 2 | 3        | 0        |  |
| 60 | 1 UK | 2020-14 | 1 UK-Norther | 2 | 2 | 3        | 0        |  |

|    |      |         |              |   |   |          |          |
|----|------|---------|--------------|---|---|----------|----------|
| 1  |      |         |              |   |   |          |          |
| 2  |      |         |              |   |   |          |          |
| 3  | 1 UK | 2020-14 | 1 UK-Norther | 2 | 3 | 4.444444 | 1.034126 |
| 4  | 1 UK | 2020-14 | 1 UK-Norther | 2 | 4 | 3.230769 | #####    |
| 5  | 1 UK | 2020-14 | 1 UK-Norther | 2 | 5 | 2.142857 | #####    |
| 6  | 1 UK | 2020-14 | 1 UK-Norther | 3 | 1 | 5.517839 | 1.80381  |
| 7  | 1 UK | 2020-14 | 1 UK-Norther | 3 | 2 | 6        | 2.121463 |
| 8  | 1 UK | 2020-14 | 1 UK-Norther | 3 | 3 | 8.6      | 4.712854 |
| 9  | 1 UK | 2020-14 | 1 UK-Norther | 3 | 4 | 3.533333 | #####    |
| 10 | 1 UK | 2020-14 | 1 UK-Norther | 3 | 5 | 2.166667 | #####    |
| 11 | 1 UK | 2020-14 | 1 UK-Overall | 1 | 1 | 3.03712  | #####    |
| 12 | 1 UK | 2020-14 | 1 UK-Overall | 1 | 2 | 3.674584 | #####    |
| 13 | 1 UK | 2020-14 | 1 UK-Overall | 1 | 3 | 3.416917 | #####    |
| 14 | 1 UK | 2020-14 | 1 UK-Overall | 1 | 4 | 3.191302 | #####    |
| 15 | 1 UK | 2020-14 | 1 UK-Overall | 1 | 5 | 1.903365 | #####    |
| 16 | 1 UK | 2020-14 | 1 UK-Overall | 2 | 1 | 2.990723 | #####    |
| 17 | 1 UK | 2020-14 | 1 UK-Overall | 2 | 2 | 3.182559 | #####    |
| 18 | 1 UK | 2020-14 | 1 UK-Overall | 2 | 3 | 3.479517 | #####    |
| 19 | 1 UK | 2020-14 | 1 UK-Overall | 2 | 4 | 3.125284 | #####    |
| 20 | 1 UK | 2020-14 | 1 UK-Overall | 2 | 5 | 1.941622 | #####    |
| 21 | 1 UK | 2020-14 | 1 UK-Overall | 3 | 1 | 3.096546 | #####    |
| 22 | 1 UK | 2020-14 | 1 UK-Overall | 3 | 2 | 4.364626 | 1.415231 |
| 23 | 1 UK | 2020-14 | 1 UK-Overall | 3 | 3 | 3.313185 | #####    |
| 24 | 1 UK | 2020-14 | 1 UK-Overall | 3 | 4 | 3.260364 | #####    |
| 25 | 1 UK | 2020-14 | 1 UK-Overall | 3 | 5 | 1.858442 | #####    |
| 26 | 1 UK | 2020-14 | 1 UK-Scotlan | 1 | 1 | 2.836089 | #####    |
| 27 | 1 UK | 2020-14 | 1 UK-Scotlan | 1 | 2 | 1.41373  | #####    |
| 28 | 1 UK | 2020-14 | 1 UK-Scotlan | 1 | 3 | 3.231532 | #####    |
| 29 | 1 UK | 2020-14 | 1 UK-Scotlan | 1 | 4 | 3.607284 | #####    |
| 30 | 1 UK | 2020-14 | 1 UK-Scotlan | 1 | 5 | 1.897955 | #####    |
| 31 | 1 UK | 2020-14 | 1 UK-Scotlan | 2 | 1 | 2.748478 | #####    |
| 32 | 1 UK | 2020-14 | 1 UK-Scotlan | 2 | 2 | 1.538462 | #####    |
| 33 | 1 UK | 2020-14 | 1 UK-Scotlan | 2 | 3 | 3.439024 | #####    |
| 34 | 1 UK | 2020-14 | 1 UK-Scotlan | 2 | 4 | 3.520548 | #####    |
| 35 | 1 UK | 2020-14 | 1 UK-Scotlan | 2 | 5 | 1.414634 | #####    |
| 36 | 1 UK | 2020-14 | 1 UK-Scotlan | 3 | 1 | 2.97828  | #####    |
| 37 | 1 UK | 2020-14 | 1 UK-Scotlan | 3 | 2 | 1        | #####    |
| 38 | 1 UK | 2020-14 | 1 UK-Scotlan | 3 | 3 | 2.909091 | #####    |
| 39 | 1 UK | 2020-14 | 1 UK-Scotlan | 3 | 4 | 3.741935 | #####    |
| 40 | 1 UK | 2020-14 | 1 UK-Scotlan | 3 | 5 | 2.541667 | #####    |
| 41 | 1 UK | 2020-14 | 1 UK-Wales   | 1 | 1 | 3.192863 | #####    |
| 42 | 1 UK | 2020-14 | 1 UK-Wales   | 1 | 2 | 5.438709 | 2.605991 |
| 43 | 1 UK | 2020-14 | 1 UK-Wales   | 1 | 3 | 3.088991 | #####    |
| 44 | 1 UK | 2020-14 | 1 UK-Wales   | 1 | 4 | 3.600918 | #####    |
| 45 | 1 UK | 2020-14 | 1 UK-Wales   | 1 | 5 | 1.78236  | #####    |
| 46 | 1 UK | 2020-14 | 1 UK-Wales   | 2 | 1 | 2.459126 | #####    |
| 47 | 1 UK | 2020-14 | 1 UK-Wales   | 2 | 2 | 2.3      | #####    |
| 48 | 1 UK | 2020-14 | 1 UK-Wales   | 2 | 3 | 2.941176 | #####    |
| 49 | 1 UK | 2020-14 | 1 UK-Wales   | 2 | 4 | 2.876923 | #####    |
| 50 | 1 UK | 2020-14 | 1 UK-Wales   | 2 | 5 | 1.55814  | #####    |
| 51 | 1 UK | 2020-14 | 1 UK-Wales   | 3 | 1 | 4.921937 | 1.44138  |
| 52 | 1 UK | 2020-14 | 1 UK-Wales   | 3 | 2 | 17       | 0        |
| 53 | 1 UK | 2020-14 | 1 UK-Wales   | 3 | 3 | 4        | 2.828618 |
| 54 | 1 UK | 2020-14 | 1 UK-Wales   | 3 | 4 | 5.058824 | 1.172043 |
| 55 | 1 UK | 2020-14 | 1 UK-Wales   | 3 | 5 | 2.090909 | #####    |
| 56 | 1 UK | 2020-14 | 2 UK-Englan  | 1 | 1 | 1.750485 | #####    |
| 57 | 1 UK | 2020-14 | 2 UK-Englan  | 1 | 2 | 2.492793 | #####    |
| 58 | 1 UK | 2020-14 | 2 UK-Englan  | 1 | 3 | 2.148757 | #####    |
| 59 | 1 UK | 2020-14 | 2 UK-Englan  | 1 |   |          |          |
| 60 | 1 UK | 2020-14 | 2 UK-Englan  | 1 |   |          |          |

|    |      |         |              |   |   |          |         |  |
|----|------|---------|--------------|---|---|----------|---------|--|
| 1  |      |         |              |   |   |          |         |  |
| 2  |      |         |              |   |   |          |         |  |
| 3  | 1 UK | 2020-14 | 2 UK-England | 1 | 4 | 1.500644 | #####   |  |
| 4  | 1 UK | 2020-14 | 2 UK-England | 1 | 5 | 1.106491 | #####   |  |
| 5  | 1 UK | 2020-14 | 2 UK-England | 2 | 1 | 1.770542 | #####   |  |
| 6  | 1 UK | 2020-14 | 2 UK-England | 2 | 2 | 2.361111 | #####   |  |
| 7  | 1 UK | 2020-14 | 2 UK-England | 2 | 3 | 2.192982 | #####   |  |
| 8  | 1 UK | 2020-14 | 2 UK-England | 2 | 4 | 1.481675 | #####   |  |
| 9  | 1 UK | 2020-14 | 2 UK-England | 2 | 5 | 1.146552 | #####   |  |
| 10 | 1 UK | 2020-14 | 2 UK-England | 3 | 1 | 1.725552 | #####   |  |
| 11 | 1 UK | 2020-14 | 2 UK-England | 3 | 2 | 2.642857 | #####   |  |
| 12 | 1 UK | 2020-14 | 2 UK-England | 3 | 3 | 2.074074 | #####   |  |
| 13 | 1 UK | 2020-14 | 2 UK-England | 3 | 4 | 1.520833 | #####   |  |
| 14 | 1 UK | 2020-14 | 2 UK-England | 3 | 5 | 1.060976 | #####   |  |
| 15 | 1 UK | 2020-14 | 2 UK-London  | 1 | 1 | 1.351242 | #####   |  |
| 16 | 1 UK | 2020-14 | 2 UK-London  | 1 | 2 | 1.57457  | #####   |  |
| 17 | 1 UK | 2020-14 | 2 UK-London  | 1 | 3 | 1.514339 | #####   |  |
| 18 | 1 UK | 2020-14 | 2 UK-London  | 1 | 4 | 1.314701 | #####   |  |
| 19 | 1 UK | 2020-14 | 2 UK-London  | 1 | 5 | #####    | #####   |  |
| 20 | 1 UK | 2020-14 | 2 UK-London  | 2 | 1 | 1.258045 | #####   |  |
| 21 | 1 UK | 2020-14 | 2 UK-London  | 2 | 2 | 1.125    | #####   |  |
| 22 | 1 UK | 2020-14 | 2 UK-London  | 2 | 3 | 1.6      | #####   |  |
| 23 | 1 UK | 2020-14 | 2 UK-London  | 2 | 4 | 1.238095 | #####   |  |
| 24 | 1 UK | 2020-14 | 2 UK-London  | 2 | 5 | #####    | #####   |  |
| 25 | 1 UK | 2020-14 | 2 UK-London  | 3 | 1 | 1.455644 | #####   |  |
| 26 | 1 UK | 2020-14 | 2 UK-London  | 3 | 2 | 2.5      | #####   |  |
| 27 | 1 UK | 2020-14 | 2 UK-London  | 3 | 3 | 1.428571 | #####   |  |
| 28 | 1 UK | 2020-14 | 2 UK-London  | 3 | 4 | 1.380952 | #####   |  |
| 29 | 1 UK | 2020-14 | 2 UK-London  | 3 | 5 | 1        | #####   |  |
| 30 | 1 UK | 2020-14 | 2 UK-Norther | 1 | 1 | 2.368574 | #####   |  |
| 31 | 1 UK | 2020-14 | 2 UK-Norther | 1 | 2 | 3.536645 | #####   |  |
| 32 | 1 UK | 2020-14 | 2 UK-Norther | 1 | 3 | 2.377055 | #####   |  |
| 33 | 1 UK | 2020-14 | 2 UK-Norther | 1 | 4 | 2.210793 | #####   |  |
| 34 | 1 UK | 2020-14 | 2 UK-Norther | 1 | 5 | 1.375278 | #####   |  |
| 35 | 1 UK | 2020-14 | 2 UK-Norther | 2 | 1 | 2.213    | #####   |  |
| 36 | 1 UK | 2020-14 | 2 UK-Norther | 2 | 2 | 3        | 0       |  |
| 37 | 1 UK | 2020-14 | 2 UK-Norther | 2 | 3 | 2.526316 | #####   |  |
| 38 | 1 UK | 2020-14 | 2 UK-Norther | 2 | 4 | 1.692308 | #####   |  |
| 39 | 1 UK | 2020-14 | 2 UK-Norther | 2 | 5 | 1.428571 | #####   |  |
| 40 | 1 UK | 2020-14 | 2 UK-Norther | 3 | 1 | 2.514907 | #####   |  |
| 41 | 1 UK | 2020-14 | 2 UK-Norther | 3 | 2 | 4        | #####   |  |
| 42 | 1 UK | 2020-14 | 2 UK-Norther | 3 | 3 | 2.2      | 1.75283 |  |
| 43 | 1 UK | 2020-14 | 2 UK-Norther | 3 | 4 | 2.625    | #####   |  |
| 44 | 1 UK | 2020-14 | 2 UK-Norther | 3 | 5 | 1.333333 | #####   |  |
| 45 | 1 UK | 2020-14 | 2 UK-Overall | 1 | 1 | 1.698061 | #####   |  |
| 46 | 1 UK | 2020-14 | 2 UK-Overall | 1 | 2 | 2.364149 | #####   |  |
| 47 | 1 UK | 2020-14 | 2 UK-Overall | 1 | 3 | 2.047125 | #####   |  |
| 48 | 1 UK | 2020-14 | 2 UK-Overall | 1 | 4 | 1.495085 | #####   |  |
| 49 | 1 UK | 2020-14 | 2 UK-Overall | 1 | 5 | 1.08424  | #####   |  |
| 50 | 1 UK | 2020-14 | 2 UK-Overall | 2 | 1 | 1.693468 | #####   |  |
| 51 | 1 UK | 2020-14 | 2 UK-Overall | 2 | 2 | 2.139375 | #####   |  |
| 52 | 1 UK | 2020-14 | 2 UK-Overall | 2 | 3 | 2.103811 | #####   |  |
| 53 | 1 UK | 2020-14 | 2 UK-Overall | 2 | 4 | 1.44944  | #####   |  |
| 54 | 1 UK | 2020-14 | 2 UK-Overall | 2 | 5 | 1.107821 | #####   |  |
| 55 | 1 UK | 2020-14 | 2 UK-Overall | 3 | 1 | 1.703955 | #####   |  |
| 56 | 1 UK | 2020-14 | 2 UK-Overall | 3 | 2 | 2.662174 | #####   |  |
| 57 | 1 UK | 2020-14 | 2 UK-Overall | 3 | 3 | 1.956805 | #####   |  |
| 58 | 1 UK | 2020-14 | 2 UK-Overall | 3 | 4 | 1.545433 | #####   |  |
| 59 | 1 UK | 2020-14 | 2 UK-Overall | 3 |   |          |         |  |
| 60 | 1 UK | 2020-14 | 2 UK-Overall | 3 |   |          |         |  |

|    |      |         |              |   |   |          |       |  |  |
|----|------|---------|--------------|---|---|----------|-------|--|--|
| 1  |      |         |              |   |   |          |       |  |  |
| 2  |      |         |              |   |   |          |       |  |  |
| 3  | 1 UK | 2020-14 | 2 UK-Overall | 3 | 5 | 1.056253 | ##### |  |  |
| 4  | 1 UK | 2020-14 | 2 UK-Scotlan | 1 | 1 | 1.378221 | ##### |  |  |
| 5  | 1 UK | 2020-14 | 2 UK-Scotlan | 1 | 2 | 1.002386 | ##### |  |  |
| 6  | 1 UK | 2020-14 | 2 UK-Scotlan | 1 | 3 | 1.743689 | ##### |  |  |
| 7  | 1 UK | 2020-14 | 2 UK-Scotlan | 1 | 4 | 1.45261  | ##### |  |  |
| 8  | 1 UK | 2020-14 | 2 UK-Scotlan | 1 | 5 | #####    | ##### |  |  |
| 9  | 1 UK | 2020-14 | 2 UK-Scotlan | 2 | 1 | 1.335932 | ##### |  |  |
| 10 | 1 UK | 2020-14 | 2 UK-Scotlan | 2 | 2 | 1.153846 | ##### |  |  |
| 11 | 1 UK | 2020-14 | 2 UK-Scotlan | 2 | 3 | 1.627907 | ##### |  |  |
| 12 | 1 UK | 2020-14 | 2 UK-Scotlan | 2 | 4 | 1.363636 | ##### |  |  |
| 13 | 1 UK | 2020-14 | 2 UK-Scotlan | 2 | 5 | 1.023256 | ##### |  |  |
| 14 | 1 UK | 2020-14 | 2 UK-Scotlan | 3 | 1 | 1.447167 | ##### |  |  |
| 15 | 1 UK | 2020-14 | 2 UK-Scotlan | 3 | 2 | 0.5      | ##### |  |  |
| 16 | 1 UK | 2020-14 | 2 UK-Scotlan | 3 | 3 | 1.916667 | ##### |  |  |
| 17 | 1 UK | 2020-14 | 2 UK-Scotlan | 3 | 4 | 1.59375  | ##### |  |  |
| 18 | 1 UK | 2020-14 | 2 UK-Scotlan | 3 | 5 | #####    | ##### |  |  |
| 19 | 1 UK | 2020-14 | 2 UK-Wales   | 1 | 1 | 1.720258 | ##### |  |  |
| 20 | 1 UK | 2020-14 | 2 UK-Wales   | 1 | 2 | 2.739675 | ##### |  |  |
| 21 | 1 UK | 2020-14 | 2 UK-Wales   | 1 | 3 | 2.140976 | ##### |  |  |
| 22 | 1 UK | 2020-14 | 2 UK-Wales   | 1 | 4 | 1.440842 | ##### |  |  |
| 23 | 1 UK | 2020-14 | 2 UK-Wales   | 1 | 5 | 1.1382   | ##### |  |  |
| 24 | 1 UK | 2020-14 | 2 UK-Wales   | 2 | 1 | 1.71191  | ##### |  |  |
| 25 | 1 UK | 2020-14 | 2 UK-Wales   | 2 | 2 | 2.181818 | ##### |  |  |
| 26 | 1 UK | 2020-14 | 2 UK-Wales   | 2 | 3 | 2.25     | ##### |  |  |
| 27 | 1 UK | 2020-14 | 2 UK-Wales   | 2 | 4 | 1.4      | ##### |  |  |
| 28 | 1 UK | 2020-14 | 2 UK-Wales   | 2 | 5 | 1.139535 | ##### |  |  |
| 29 | 1 UK | 2020-14 | 2 UK-Wales   | 3 | 1 | 1.739977 | ##### |  |  |
| 30 | 1 UK | 2020-14 | 2 UK-Wales   | 3 | 2 | 5        | 0     |  |  |
| 31 | 1 UK | 2020-14 | 2 UK-Wales   | 3 | 3 | 1.666667 | ##### |  |  |
| 32 | 1 UK | 2020-14 | 2 UK-Wales   | 3 | 4 | 1.529412 | ##### |  |  |
| 33 | 1 UK | 2020-14 | 2 UK-Wales   | 3 | 5 | 1.136364 | ##### |  |  |
| 34 | 1 UK | 2020-14 | 3 UK-England | 1 | 1 | #####    | ##### |  |  |
| 35 | 1 UK | 2020-14 | 3 UK-England | 1 | 2 | 0        | 0     |  |  |
| 36 | 1 UK | 2020-14 | 3 UK-England | 1 | 3 | #####    | ##### |  |  |
| 37 | 1 UK | 2020-14 | 3 UK-England | 1 | 4 | #####    | ##### |  |  |
| 38 | 1 UK | 2020-14 | 3 UK-England | 1 | 5 | #####    | ##### |  |  |
| 39 | 1 UK | 2020-14 | 3 UK-England | 2 | 1 | #####    | ##### |  |  |
| 40 | 1 UK | 2020-14 | 3 UK-England | 2 | 2 | 0        | 0     |  |  |
| 41 | 1 UK | 2020-14 | 3 UK-England | 2 | 3 | #####    | ##### |  |  |
| 42 | 1 UK | 2020-14 | 3 UK-England | 2 | 4 | #####    | ##### |  |  |
| 43 | 1 UK | 2020-14 | 3 UK-England | 2 | 5 | #####    | ##### |  |  |
| 44 | 1 UK | 2020-14 | 3 UK-England | 3 | 1 | #####    | ##### |  |  |
| 45 | 1 UK | 2020-14 | 3 UK-England | 3 | 2 | 0        | 0     |  |  |
| 46 | 1 UK | 2020-14 | 3 UK-England | 3 | 3 | 0        | 0     |  |  |
| 47 | 1 UK | 2020-14 | 3 UK-England | 3 | 4 | #####    | ##### |  |  |
| 48 | 1 UK | 2020-14 | 3 UK-England | 3 | 5 | 0        | 0     |  |  |
| 49 | 1 UK | 2020-14 | 3 UK-London  | 1 | 1 | 0        | 0     |  |  |
| 50 | 1 UK | 2020-14 | 3 UK-London  | 1 | 2 | 0        | 0     |  |  |
| 51 | 1 UK | 2020-14 | 3 UK-London  | 1 | 3 | 0        | 0     |  |  |
| 52 | 1 UK | 2020-14 | 3 UK-London  | 1 | 4 | 0        | 0     |  |  |
| 53 | 1 UK | 2020-14 | 3 UK-London  | 1 | 5 | 0        | 0     |  |  |
| 54 | 1 UK | 2020-14 | 3 UK-London  | 2 | 1 | 0        | 0     |  |  |
| 55 | 1 UK | 2020-14 | 3 UK-London  | 2 | 2 | 0        | 0     |  |  |
| 56 | 1 UK | 2020-14 | 3 UK-London  | 2 | 3 | 0        | 0     |  |  |
| 57 | 1 UK | 2020-14 | 3 UK-London  | 2 | 4 | 0        | 0     |  |  |
| 58 | 1 UK | 2020-14 | 3 UK-London  | 2 | 5 | 0        | 0     |  |  |
| 59 | 1 UK | 2020-14 | 3 UK-London  | 2 |   |          |       |  |  |
| 60 | 1 UK | 2020-14 | 3 UK-London  | 2 |   |          |       |  |  |



|    |      |         |              |   |   |       |       |  |
|----|------|---------|--------------|---|---|-------|-------|--|
| 1  |      |         |              |   |   |       |       |  |
| 2  |      |         |              |   |   |       |       |  |
| 3  | 1 UK | 2020-14 | 3 UK-London  | 3 | 1 | 0     | 0     |  |
| 4  | 1 UK | 2020-14 | 3 UK-London  | 3 | 2 | 0     | 0     |  |
| 5  | 1 UK | 2020-14 | 3 UK-London  | 3 | 3 | 0     | 0     |  |
| 6  | 1 UK | 2020-14 | 3 UK-London  | 3 | 4 | 0     | 0     |  |
| 7  | 1 UK | 2020-14 | 3 UK-London  | 3 | 5 | 0     | 0     |  |
| 8  | 1 UK | 2020-14 | 3 UK-Norther | 1 | 1 | 0     | 0     |  |
| 9  | 1 UK | 2020-14 | 3 UK-Norther | 1 | 2 | 0     | 0     |  |
| 10 | 1 UK | 2020-14 | 3 UK-Norther | 1 | 3 | 0     | 0     |  |
| 11 | 1 UK | 2020-14 | 3 UK-Norther | 1 | 4 | 0     | 0     |  |
| 12 | 1 UK | 2020-14 | 3 UK-Norther | 1 | 5 | 0     | 0     |  |
| 13 | 1 UK | 2020-14 | 3 UK-Norther | 2 | 1 | 0     | 0     |  |
| 14 | 1 UK | 2020-14 | 3 UK-Norther | 2 | 2 | 0     | 0     |  |
| 15 | 1 UK | 2020-14 | 3 UK-Norther | 2 | 3 | 0     | 0     |  |
| 16 | 1 UK | 2020-14 | 3 UK-Norther | 2 | 4 | 0     | 0     |  |
| 17 | 1 UK | 2020-14 | 3 UK-Norther | 2 | 5 | 0     | 0     |  |
| 18 | 1 UK | 2020-14 | 3 UK-Norther | 3 | 1 | 0     | 0     |  |
| 19 | 1 UK | 2020-14 | 3 UK-Norther | 3 | 2 | 0     | 0     |  |
| 20 | 1 UK | 2020-14 | 3 UK-Norther | 3 | 3 | 0     | 0     |  |
| 21 | 1 UK | 2020-14 | 3 UK-Norther | 3 | 4 | 0     | 0     |  |
| 22 | 1 UK | 2020-14 | 3 UK-Norther | 3 | 5 | 0     | 0     |  |
| 23 | 1 UK | 2020-14 | 3 UK-Norther | 3 | 5 | 0     | 0     |  |
| 24 | 1 UK | 2020-14 | 3 UK-Overall | 1 | 1 | ##### | ##### |  |
| 25 | 1 UK | 2020-14 | 3 UK-Overall | 1 | 2 | ##### | ##### |  |
| 26 | 1 UK | 2020-14 | 3 UK-Overall | 1 | 3 | ##### | ##### |  |
| 27 | 1 UK | 2020-14 | 3 UK-Overall | 1 | 4 | ##### | ##### |  |
| 28 | 1 UK | 2020-14 | 3 UK-Overall | 1 | 5 | ##### | ##### |  |
| 29 | 1 UK | 2020-14 | 3 UK-Overall | 2 | 1 | ##### | ##### |  |
| 30 | 1 UK | 2020-14 | 3 UK-Overall | 2 | 2 | 0     | 0     |  |
| 31 | 1 UK | 2020-14 | 3 UK-Overall | 2 | 3 | ##### | ##### |  |
| 32 | 1 UK | 2020-14 | 3 UK-Overall | 2 | 4 | ##### | ##### |  |
| 33 | 1 UK | 2020-14 | 3 UK-Overall | 2 | 5 | ##### | ##### |  |
| 34 | 1 UK | 2020-14 | 3 UK-Overall | 3 | 1 | ##### | ##### |  |
| 35 | 1 UK | 2020-14 | 3 UK-Overall | 3 | 2 | ##### | ##### |  |
| 36 | 1 UK | 2020-14 | 3 UK-Overall | 3 | 3 | 0     | 0     |  |
| 37 | 1 UK | 2020-14 | 3 UK-Overall | 3 | 4 | ##### | ##### |  |
| 38 | 1 UK | 2020-14 | 3 UK-Overall | 3 | 5 | 0     | 0     |  |
| 39 | 1 UK | 2020-14 | 3 UK-Scotlan | 1 | 1 | ##### | ##### |  |
| 40 | 1 UK | 2020-14 | 3 UK-Scotlan | 1 | 2 | ##### | ##### |  |
| 41 | 1 UK | 2020-14 | 3 UK-Scotlan | 1 | 3 | 0     | 0     |  |
| 42 | 1 UK | 2020-14 | 3 UK-Scotlan | 1 | 4 | ##### | ##### |  |
| 43 | 1 UK | 2020-14 | 3 UK-Scotlan | 1 | 5 | 0     | 0     |  |
| 44 | 1 UK | 2020-14 | 3 UK-Scotlan | 2 | 1 | ##### | ##### |  |
| 45 | 1 UK | 2020-14 | 3 UK-Scotlan | 2 | 2 | 0     | 0     |  |
| 46 | 1 UK | 2020-14 | 3 UK-Scotlan | 2 | 3 | 0     | 0     |  |
| 47 | 1 UK | 2020-14 | 3 UK-Scotlan | 2 | 4 | ##### | ##### |  |
| 48 | 1 UK | 2020-14 | 3 UK-Scotlan | 2 | 5 | 0     | 0     |  |
| 49 | 1 UK | 2020-14 | 3 UK-Scotlan | 3 | 1 | ##### | ##### |  |
| 50 | 1 UK | 2020-14 | 3 UK-Scotlan | 3 | 2 | 0.5   | ##### |  |
| 51 | 1 UK | 2020-14 | 3 UK-Scotlan | 3 | 3 | 0     | 0     |  |
| 52 | 1 UK | 2020-14 | 3 UK-Scotlan | 3 | 4 | 0     | 0     |  |
| 53 | 1 UK | 2020-14 | 3 UK-Scotlan | 3 | 5 | 0     | 0     |  |
| 54 | 1 UK | 2020-14 | 3 UK-Wales   | 1 | 1 | ##### | ##### |  |
| 55 | 1 UK | 2020-14 | 3 UK-Wales   | 1 | 2 | 0     | 0     |  |
| 56 | 1 UK | 2020-14 | 3 UK-Wales   | 1 | 3 | 0     | 0     |  |
| 57 | 1 UK | 2020-14 | 3 UK-Wales   | 1 | 4 | ##### | ##### |  |
| 58 | 1 UK | 2020-14 | 3 UK-Wales   | 1 | 5 | 0     | 0     |  |
| 59 | 1 UK | 2020-14 | 3 UK-Wales   | 2 | 1 | 0     | 0     |  |
| 60 | 1 UK | 2020-14 | 3 UK-Wales   | 2 | 1 | 0     | 0     |  |

1  
2  
3  
4  
5  
6  
7  
8  
9  
10  
11  
12  
13  
14  
15  
16  
17  
18  
19  
20  
21  
22  
23  
24  
25  
26  
27  
28  
29  
30  
31  
32  
33  
34  
35  
36  
37  
38  
39  
40  
41  
42  
43  
44  
45  
46  
47  
48  
49  
50  
51  
52  
53  
54  
55  
56  
57  
58  
59  
60

|      |         |              |   |   |          |          |
|------|---------|--------------|---|---|----------|----------|
| 1 UK | 2020-14 | 3 UK-Wales   | 2 | 2 | 0        | 0        |
| 1 UK | 2020-14 | 3 UK-Wales   | 2 | 3 | 0        | 0        |
| 1 UK | 2020-14 | 3 UK-Wales   | 2 | 4 | 0        | 0        |
| 1 UK | 2020-14 | 3 UK-Wales   | 2 | 5 | 0        | 0        |
| 1 UK | 2020-14 | 3 UK-Wales   | 3 | 1 | #####    | #####    |
| 1 UK | 2020-14 | 3 UK-Wales   | 3 | 2 | 0        | 0        |
| 1 UK | 2020-14 | 3 UK-Wales   | 3 | 3 | 0        | 0        |
| 1 UK | 2020-14 | 3 UK-Wales   | 3 | 4 | #####    | #####    |
| 1 UK | 2020-14 | 3 UK-Wales   | 3 | 5 | 0        | 0        |
| 1 UK | 2020-14 | 4 UK-England | 1 | 1 | #####    | #####    |
| 1 UK | 2020-14 | 4 UK-England | 1 | 2 | #####    | #####    |
| 1 UK | 2020-14 | 4 UK-England | 1 | 3 | #####    | #####    |
| 1 UK | 2020-14 | 4 UK-England | 1 | 4 | #####    | #####    |
| 1 UK | 2020-14 | 4 UK-England | 1 | 5 | #####    | #####    |
| 1 UK | 2020-14 | 4 UK-England | 2 | 1 | #####    | #####    |
| 1 UK | 2020-14 | 4 UK-England | 2 | 2 | #####    | #####    |
| 1 UK | 2020-14 | 4 UK-England | 2 | 3 | #####    | #####    |
| 1 UK | 2020-14 | 4 UK-England | 2 | 4 | #####    | #####    |
| 1 UK | 2020-14 | 4 UK-England | 2 | 5 | #####    | #####    |
| 1 UK | 2020-14 | 4 UK-England | 3 | 1 | #####    | #####    |
| 1 UK | 2020-14 | 4 UK-England | 3 | 2 | #####    | #####    |
| 1 UK | 2020-14 | 4 UK-England | 3 | 3 | 0.56     | #####    |
| 1 UK | 2020-14 | 4 UK-England | 3 | 4 | 0.71875  | #####    |
| 1 UK | 2020-14 | 4 UK-England | 3 | 5 | #####    | #####    |
| 1 UK | 2020-14 | 4 UK-London  | 1 | 1 | #####    | #####    |
| 1 UK | 2020-14 | 4 UK-London  | 1 | 2 | 1.09369  | 1.061466 |
| 1 UK | 2020-14 | 4 UK-London  | 1 | 3 | 0        | 0        |
| 1 UK | 2020-14 | 4 UK-London  | 1 | 4 | 1.435474 | #####    |
| 1 UK | 2020-14 | 4 UK-London  | 1 | 5 | 0        | 0        |
| 1 UK | 2020-14 | 4 UK-London  | 2 | 1 | #####    | #####    |
| 1 UK | 2020-14 | 4 UK-London  | 2 | 2 | 1.625    | 1.520151 |
| 1 UK | 2020-14 | 4 UK-London  | 2 | 3 | 0        | 0        |
| 1 UK | 2020-14 | 4 UK-London  | 2 | 4 | 1.333333 | #####    |
| 1 UK | 2020-14 | 4 UK-London  | 2 | 5 | 0        | 0        |
| 1 UK | 2020-14 | 4 UK-London  | 3 | 1 | #####    | #####    |
| 1 UK | 2020-14 | 4 UK-London  | 3 | 2 | 0        | 0        |
| 1 UK | 2020-14 | 4 UK-London  | 3 | 3 | 0        | 0        |
| 1 UK | 2020-14 | 4 UK-London  | 3 | 4 | 1.52381  | 1.016083 |
| 1 UK | 2020-14 | 4 UK-London  | 3 | 5 | 0        | 0        |
| 1 UK | 2020-14 | 4 UK-Norther | 1 | 1 | #####    | #####    |
| 1 UK | 2020-14 | 4 UK-Norther | 1 | 2 | 0        | 0        |
| 1 UK | 2020-14 | 4 UK-Norther | 1 | 3 | #####    | #####    |
| 1 UK | 2020-14 | 4 UK-Norther | 1 | 4 | #####    | #####    |
| 1 UK | 2020-14 | 4 UK-Norther | 1 | 5 | 0        | 0        |
| 1 UK | 2020-14 | 4 UK-Norther | 2 | 1 | #####    | #####    |
| 1 UK | 2020-14 | 4 UK-Norther | 2 | 2 | 0        | 0        |
| 1 UK | 2020-14 | 4 UK-Norther | 2 | 3 | 1.5      | 1.12293  |
| 1 UK | 2020-14 | 4 UK-Norther | 2 | 4 | 1.038462 | #####    |
| 1 UK | 2020-14 | 4 UK-Norther | 2 | 5 | 0        | 0        |
| 1 UK | 2020-14 | 4 UK-Norther | 3 | 1 | #####    | #####    |
| 1 UK | 2020-14 | 4 UK-Norther | 3 | 2 | 0        | 0        |
| 1 UK | 2020-14 | 4 UK-Norther | 3 | 3 | 0        | 0        |
| 1 UK | 2020-14 | 4 UK-Norther | 3 | 4 | #####    | #####    |
| 1 UK | 2020-14 | 4 UK-Norther | 3 | 5 | 0        | 0        |
| 1 UK | 2020-14 | 4 UK-Overall | 1 | 1 | #####    | #####    |
| 1 UK | 2020-14 | 4 UK-Overall | 1 | 2 | #####    | #####    |

|    |      |         |              |   |   |          |          |  |
|----|------|---------|--------------|---|---|----------|----------|--|
| 1  |      |         |              |   |   |          |          |  |
| 2  |      |         |              |   |   |          |          |  |
| 3  | 1 UK | 2020-14 | 4 UK-Overall | 1 | 3 | #####    | #####    |  |
| 4  | 1 UK | 2020-14 | 4 UK-Overall | 1 | 4 | #####    | #####    |  |
| 5  | 1 UK | 2020-14 | 4 UK-Overall | 1 | 5 | #####    | #####    |  |
| 6  | 1 UK | 2020-14 | 4 UK-Overall | 2 | 1 | #####    | #####    |  |
| 7  | 1 UK | 2020-14 | 4 UK-Overall | 2 | 2 | #####    | #####    |  |
| 8  | 1 UK | 2020-14 | 4 UK-Overall | 2 | 3 | #####    | #####    |  |
| 9  | 1 UK | 2020-14 | 4 UK-Overall | 2 | 4 | #####    | #####    |  |
| 10 | 1 UK | 2020-14 | 4 UK-Overall | 2 | 5 | #####    | #####    |  |
| 11 | 1 UK | 2020-14 | 4 UK-Overall | 3 | 1 | #####    | #####    |  |
| 12 | 1 UK | 2020-14 | 4 UK-Overall | 3 | 2 | #####    | #####    |  |
| 13 | 1 UK | 2020-14 | 4 UK-Overall | 3 | 3 | #####    | #####    |  |
| 14 | 1 UK | 2020-14 | 4 UK-Overall | 3 | 4 | #####    | #####    |  |
| 15 | 1 UK | 2020-14 | 4 UK-Overall | 3 | 5 | #####    | #####    |  |
| 16 | 1 UK | 2020-14 | 4 UK-Scotlan | 1 | 1 | #####    | #####    |  |
| 17 | 1 UK | 2020-14 | 4 UK-Scotlan | 1 | 2 | 0        | 0        |  |
| 18 | 1 UK | 2020-14 | 4 UK-Scotlan | 1 | 3 | 1.296808 | #####    |  |
| 19 | 1 UK | 2020-14 | 4 UK-Scotlan | 1 | 4 | #####    | #####    |  |
| 20 | 1 UK | 2020-14 | 4 UK-Scotlan | 1 | 5 | #####    | #####    |  |
| 21 | 1 UK | 2020-14 | 4 UK-Scotlan | 2 | 1 | #####    | #####    |  |
| 22 | 1 UK | 2020-14 | 4 UK-Scotlan | 2 | 2 | 0        | 0        |  |
| 23 | 1 UK | 2020-14 | 4 UK-Scotlan | 2 | 3 | 1.487805 | #####    |  |
| 24 | 1 UK | 2020-14 | 4 UK-Scotlan | 2 | 4 | 1.205479 | #####    |  |
| 25 | 1 UK | 2020-14 | 4 UK-Scotlan | 2 | 5 | 0        | 0        |  |
| 26 | 1 UK | 2020-14 | 4 UK-Scotlan | 2 | 5 | 0        | 0        |  |
| 27 | 1 UK | 2020-14 | 4 UK-Scotlan | 3 | 1 | #####    | #####    |  |
| 28 | 1 UK | 2020-14 | 4 UK-Scotlan | 3 | 2 | 0        | 0        |  |
| 29 | 1 UK | 2020-14 | 4 UK-Scotlan | 3 | 3 | 1        | #####    |  |
| 30 | 1 UK | 2020-14 | 4 UK-Scotlan | 3 | 4 | #####    | #####    |  |
| 31 | 1 UK | 2020-14 | 4 UK-Scotlan | 3 | 5 | #####    | #####    |  |
| 32 | 1 UK | 2020-14 | 4 UK-Wales   | 1 | 1 | #####    | #####    |  |
| 33 | 1 UK | 2020-14 | 4 UK-Wales   | 1 | 2 | 0        | 0        |  |
| 34 | 1 UK | 2020-14 | 4 UK-Wales   | 1 | 3 | #####    | #####    |  |
| 35 | 1 UK | 2020-14 | 4 UK-Wales   | 1 | 4 | 1.513731 | #####    |  |
| 36 | 1 UK | 2020-14 | 4 UK-Wales   | 1 | 5 | #####    | #####    |  |
| 37 | 1 UK | 2020-14 | 4 UK-Wales   | 2 | 1 | #####    | #####    |  |
| 38 | 1 UK | 2020-14 | 4 UK-Wales   | 2 | 2 | 0        | 0        |  |
| 39 | 1 UK | 2020-14 | 4 UK-Wales   | 2 | 3 | #####    | #####    |  |
| 40 | 1 UK | 2020-14 | 4 UK-Wales   | 2 | 4 | 1.184615 | #####    |  |
| 41 | 1 UK | 2020-14 | 4 UK-Wales   | 2 | 5 | #####    | #####    |  |
| 42 | 1 UK | 2020-14 | 4 UK-Wales   | 3 | 1 | #####    | #####    |  |
| 43 | 1 UK | 2020-14 | 4 UK-Wales   | 3 | 2 | 0        | 0        |  |
| 44 | 1 UK | 2020-14 | 4 UK-Wales   | 3 | 3 | 2        | 1.414309 |  |
| 45 | 1 UK | 2020-14 | 4 UK-Wales   | 3 | 4 | 2.176471 | 1.116903 |  |
| 46 | 1 UK | 2020-14 | 4 UK-Wales   | 3 | 5 | 0        | 0        |  |
| 47 | 1 UK | 2020-14 | 5 UK-Englan  | 1 | 1 | #####    | #####    |  |
| 48 | 1 UK | 2020-14 | 5 UK-Englan  | 1 | 2 | #####    | #####    |  |
| 49 | 1 UK | 2020-14 | 5 UK-Englan  | 1 | 3 | #####    | #####    |  |
| 50 | 1 UK | 2020-14 | 5 UK-Englan  | 1 | 4 | #####    | #####    |  |
| 51 | 1 UK | 2020-14 | 5 UK-Englan  | 1 | 5 | #####    | #####    |  |
| 52 | 1 UK | 2020-14 | 5 UK-Englan  | 2 | 1 | #####    | #####    |  |
| 53 | 1 UK | 2020-14 | 5 UK-Englan  | 2 | 2 | #####    | #####    |  |
| 54 | 1 UK | 2020-14 | 5 UK-Englan  | 2 | 3 | #####    | #####    |  |
| 55 | 1 UK | 2020-14 | 5 UK-Englan  | 2 | 4 | 1.073684 | #####    |  |
| 56 | 1 UK | 2020-14 | 5 UK-Englan  | 2 | 5 | #####    | #####    |  |
| 57 | 1 UK | 2020-14 | 5 UK-Englan  | 2 | 5 | #####    | #####    |  |
| 58 | 1 UK | 2020-14 | 5 UK-Englan  | 3 | 1 | #####    | #####    |  |
| 59 | 1 UK | 2020-14 | 5 UK-Englan  | 3 | 2 | #####    | #####    |  |
| 60 | 1 UK | 2020-14 | 5 UK-Englan  | 3 | 3 | #####    | #####    |  |

|    |      |         |               |   |   |          |          |  |
|----|------|---------|---------------|---|---|----------|----------|--|
| 1  |      |         |               |   |   |          |          |  |
| 2  |      |         |               |   |   |          |          |  |
| 3  | 1 UK | 2020-14 | 5 UK-England  | 3 | 4 | #####    | #####    |  |
| 4  | 1 UK | 2020-14 | 5 UK-England  | 3 | 5 | #####    | #####    |  |
| 5  | 1 UK | 2020-14 | 5 UK-London   | 1 | 1 | #####    | #####    |  |
| 6  | 1 UK | 2020-14 | 5 UK-London   | 1 | 2 | #####    | #####    |  |
| 7  | 1 UK | 2020-14 | 5 UK-London   | 1 | 3 | #####    | #####    |  |
| 8  | 1 UK | 2020-14 | 5 UK-London   | 1 | 4 | 1.013805 | #####    |  |
| 9  | 1 UK | 2020-14 | 5 UK-London   | 1 | 5 | #####    | #####    |  |
| 10 | 1 UK | 2020-14 | 5 UK-London   | 2 | 1 | #####    | #####    |  |
| 11 | 1 UK | 2020-14 | 5 UK-London   | 2 | 2 | 0.25     | #####    |  |
| 12 | 1 UK | 2020-14 | 5 UK-London   | 2 | 3 | #####    | #####    |  |
| 13 | 1 UK | 2020-14 | 5 UK-London   | 2 | 4 | #####    | #####    |  |
| 14 | 1 UK | 2020-14 | 5 UK-London   | 2 | 5 | 1        | #####    |  |
| 15 | 1 UK | 2020-14 | 5 UK-London   | 3 | 1 | #####    | #####    |  |
| 16 | 1 UK | 2020-14 | 5 UK-London   | 3 | 2 | 0        | 0        |  |
| 17 | 1 UK | 2020-14 | 5 UK-London   | 3 | 3 | #####    | #####    |  |
| 18 | 1 UK | 2020-14 | 5 UK-London   | 3 | 4 | 1.190476 | #####    |  |
| 19 | 1 UK | 2020-14 | 5 UK-London   | 3 | 5 | 0.875    | #####    |  |
| 20 | 1 UK | 2020-14 | 5 UK-Norther  | 1 | 1 | 1.742023 | #####    |  |
| 21 | 1 UK | 2020-14 | 5 UK-Norther  | 1 | 2 | 1.07329  | #####    |  |
| 22 | 1 UK | 2020-14 | 5 UK-Norther  | 1 | 3 | 3.298673 | 1.83412  |  |
| 23 | 1 UK | 2020-14 | 5 UK-Norther  | 1 | 4 | #####    | #####    |  |
| 24 | 1 UK | 2020-14 | 5 UK-Norther  | 1 | 5 | #####    | #####    |  |
| 25 | 1 UK | 2020-14 | 5 UK-Norther  | 2 | 1 | #####    | #####    |  |
| 26 | 1 UK | 2020-14 | 5 UK-Norther  | 2 | 2 | 0        | 0        |  |
| 27 | 1 UK | 2020-14 | 5 UK-Norther  | 2 | 3 | #####    | #####    |  |
| 28 | 1 UK | 2020-14 | 5 UK-Norther  | 2 | 4 | 0.5      | #####    |  |
| 29 | 1 UK | 2020-14 | 5 UK-Norther  | 2 | 5 | #####    | #####    |  |
| 30 | 1 UK | 2020-14 | 5 UK-Norther  | 3 | 1 | 2.879804 | 1.425992 |  |
| 31 | 1 UK | 2020-14 | 5 UK-Norther  | 3 | 2 | 2        | 1.414309 |  |
| 32 | 1 UK | 2020-14 | 5 UK-Norther  | 3 | 3 | 6.4      | 3.683725 |  |
| 33 | 1 UK | 2020-14 | 5 UK-Norther  | 3 | 4 | 0.6875   | #####    |  |
| 34 | 1 UK | 2020-14 | 5 UK-Norther  | 3 | 5 | #####    | #####    |  |
| 35 | 1 UK | 2020-14 | 5 UK-Overall  | 1 | 1 | #####    | #####    |  |
| 36 | 1 UK | 2020-14 | 5 UK-Overall  | 1 | 2 | #####    | #####    |  |
| 37 | 1 UK | 2020-14 | 5 UK-Overall  | 1 | 3 | #####    | #####    |  |
| 38 | 1 UK | 2020-14 | 5 UK-Overall  | 1 | 4 | #####    | #####    |  |
| 39 | 1 UK | 2020-14 | 5 UK-Overall  | 1 | 5 | #####    | #####    |  |
| 40 | 1 UK | 2020-14 | 5 UK-Overall  | 2 | 1 | #####    | #####    |  |
| 41 | 1 UK | 2020-14 | 5 UK-Overall  | 2 | 2 | #####    | #####    |  |
| 42 | 1 UK | 2020-14 | 5 UK-Overall  | 2 | 3 | #####    | #####    |  |
| 43 | 1 UK | 2020-14 | 5 UK-Overall  | 2 | 4 | 1.002447 | #####    |  |
| 44 | 1 UK | 2020-14 | 5 UK-Overall  | 2 | 5 | #####    | #####    |  |
| 45 | 1 UK | 2020-14 | 5 UK-Overall  | 3 | 1 | #####    | 0.114641 |  |
| 46 | 1 UK | 2020-14 | 5 UK-Overall  | 3 | 2 | #####    | #####    |  |
| 47 | 1 UK | 2020-14 | 5 UK-Overall  | 3 | 3 | #####    | #####    |  |
| 48 | 1 UK | 2020-14 | 5 UK-Overall  | 3 | 4 | #####    | #####    |  |
| 49 | 1 UK | 2020-14 | 5 UK-Overall  | 3 | 5 | #####    | #####    |  |
| 50 | 1 UK | 2020-14 | 5 UK-Scotland | 1 | 1 | #####    | #####    |  |
| 51 | 1 UK | 2020-14 | 5 UK-Scotland | 1 | 2 | #####    | #####    |  |
| 52 | 1 UK | 2020-14 | 5 UK-Scotland | 1 | 3 | #####    | #####    |  |
| 53 | 1 UK | 2020-14 | 5 UK-Scotland | 1 | 4 | 1.138105 | #####    |  |
| 54 | 1 UK | 2020-14 | 5 UK-Scotland | 1 | 5 | #####    | #####    |  |
| 55 | 1 UK | 2020-14 | 5 UK-Scotland | 2 | 1 | #####    | #####    |  |
| 56 | 1 UK | 2020-14 | 5 UK-Scotland | 2 | 2 | #####    | #####    |  |
| 57 | 1 UK | 2020-14 | 5 UK-Scotland | 2 | 3 | #####    | #####    |  |
| 58 | 1 UK | 2020-14 | 5 UK-Scotland | 2 | 4 | #####    | #####    |  |
| 59 | 1 UK | 2020-14 | 5 UK-Scotland | 2 | 5 | #####    | #####    |  |
| 60 | 1 UK | 2020-14 | 5 UK-Scotland | 2 | 4 | #####    | #####    |  |

|    |      |         |              |   |   |          |          |  |
|----|------|---------|--------------|---|---|----------|----------|--|
| 1  |      |         |              |   |   |          |          |  |
| 2  |      |         |              |   |   |          |          |  |
| 3  | 1 UK | 2020-14 | 5 UK-Scotlan | 2 | 5 | #####    | #####    |  |
| 4  | 1 UK | 2020-14 | 5 UK-Scotlan | 3 | 1 | 1.124145 | #####    |  |
| 5  | 1 UK | 2020-14 | 5 UK-Scotlan | 3 | 2 | 0        | 0        |  |
| 6  | 1 UK | 2020-14 | 5 UK-Scotlan | 3 | 3 | #####    | #####    |  |
| 7  | 1 UK | 2020-14 | 5 UK-Scotlan | 3 | 4 | 1.625    | #####    |  |
| 8  | 1 UK | 2020-14 | 5 UK-Scotlan | 3 | 5 | 1.166667 | #####    |  |
| 9  | 1 UK | 2020-14 | 5 UK-Wales   | 1 | 1 | 1.078411 | #####    |  |
| 10 | 1 UK | 2020-14 | 5 UK-Wales   | 1 | 2 | 3.323269 | 1.922293 |  |
| 11 | 1 UK | 2020-14 | 5 UK-Wales   | 1 | 3 | #####    | #####    |  |
| 12 | 1 UK | 2020-14 | 5 UK-Wales   | 1 | 4 | #####    | #####    |  |
| 13 | 1 UK | 2020-14 | 5 UK-Wales   | 1 | 5 | #####    | #####    |  |
| 14 | 1 UK | 2020-14 | 5 UK-Wales   | 2 | 1 | #####    | #####    |  |
| 15 | 1 UK | 2020-14 | 5 UK-Wales   | 2 | 2 | 1.181818 | #####    |  |
| 16 | 1 UK | 2020-14 | 5 UK-Wales   | 2 | 3 | #####    | #####    |  |
| 17 | 1 UK | 2020-14 | 5 UK-Wales   | 2 | 4 | #####    | #####    |  |
| 18 | 1 UK | 2020-14 | 5 UK-Wales   | 2 | 5 | #####    | #####    |  |
| 19 | 1 UK | 2020-14 | 5 UK-Wales   | 3 | 1 | 2.10959  | 1.065029 |  |
| 20 | 1 UK | 2020-14 | 5 UK-Wales   | 3 | 2 | 12       | 0        |  |
| 21 | 1 UK | 2020-14 | 5 UK-Wales   | 3 | 3 | #####    | #####    |  |
| 22 | 1 UK | 2020-14 | 5 UK-Wales   | 3 | 4 | 1.176471 | #####    |  |
| 23 | 1 UK | 2020-14 | 5 UK-Wales   | 3 | 5 | #####    | #####    |  |
| 24 | 1 UK | 2020-14 | 5 UK-Wales   | 3 | 5 | #####    | #####    |  |
| 25 | 1 UK | 2020-15 | 1 UK-Englan  | 1 | 1 | 3.749982 | #####    |  |
| 26 | 1 UK | 2020-15 | 1 UK-Englan  | 1 | 2 | 5.093529 | 1.001557 |  |
| 27 | 1 UK | 2020-15 | 1 UK-Englan  | 1 | 3 | 4.093652 | #####    |  |
| 28 | 1 UK | 2020-15 | 1 UK-Englan  | 1 | 4 | 4.025475 | #####    |  |
| 29 | 1 UK | 2020-15 | 1 UK-Englan  | 1 | 5 | 2.156921 | #####    |  |
| 30 | 1 UK | 2020-15 | 1 UK-Englan  | 2 | 1 | 3.829914 | #####    |  |
| 31 | 1 UK | 2020-15 | 1 UK-Englan  | 2 | 2 | 5.193548 | 1.257255 |  |
| 32 | 1 UK | 2020-15 | 1 UK-Englan  | 2 | 3 | 3.988506 | #####    |  |
| 33 | 1 UK | 2020-15 | 1 UK-Englan  | 2 | 4 | 4.123967 | #####    |  |
| 34 | 1 UK | 2020-15 | 1 UK-Englan  | 2 | 5 | 1.961039 | #####    |  |
| 35 | 1 UK | 2020-15 | 1 UK-Englan  | 3 | 1 | 3.641108 | #####    |  |
| 36 | 1 UK | 2020-15 | 1 UK-Englan  | 3 | 2 | 4.75     | 1.023238 |  |
| 37 | 1 UK | 2020-15 | 1 UK-Englan  | 3 | 3 | 4.24     | #####    |  |
| 38 | 1 UK | 2020-15 | 1 UK-Englan  | 3 | 4 | 3.907407 | #####    |  |
| 39 | 1 UK | 2020-15 | 1 UK-Englan  | 3 | 5 | 2.349206 | #####    |  |
| 40 | 1 UK | 2020-15 | 1 UK-London  | 1 | 1 | 2.011433 | #####    |  |
| 41 | 1 UK | 2020-15 | 1 UK-London  | 1 | 2 | 1.75     | #####    |  |
| 42 | 1 UK | 2020-15 | 1 UK-London  | 1 | 3 | 2.494292 | #####    |  |
| 43 | 1 UK | 2020-15 | 1 UK-London  | 1 | 4 | 1.917414 | #####    |  |
| 44 | 1 UK | 2020-15 | 1 UK-London  | 1 | 5 | 1.261488 | #####    |  |
| 45 | 1 UK | 2020-15 | 1 UK-London  | 2 | 1 | 2.160147 | #####    |  |
| 46 | 1 UK | 2020-15 | 1 UK-London  | 2 | 2 | 1.75     | #####    |  |
| 47 | 1 UK | 2020-15 | 1 UK-London  | 2 | 3 | 2.625    | #####    |  |
| 48 | 1 UK | 2020-15 | 1 UK-London  | 2 | 4 | 2.5625   | #####    |  |
| 49 | 1 UK | 2020-15 | 1 UK-London  | 2 | 5 | #####    | #####    |  |
| 50 | 1 UK | 2020-15 | 1 UK-London  | 3 | 1 | 1.766617 | #####    |  |
| 51 | 1 UK | 2020-15 | 1 UK-London  | 3 | 3 | 2.25     | #####    |  |
| 52 | 1 UK | 2020-15 | 1 UK-London  | 3 | 4 | 1.230769 | #####    |  |
| 53 | 1 UK | 2020-15 | 1 UK-London  | 3 | 5 | 1.875    | #####    |  |
| 54 | 1 UK | 2020-15 | 1 UK-Norther | 1 | 1 | 3.418187 | #####    |  |
| 55 | 1 UK | 2020-15 | 1 UK-Norther | 1 | 3 | 5        | 1.571454 |  |
| 56 | 1 UK | 2020-15 | 1 UK-Norther | 1 | 4 | 3.702331 | #####    |  |
| 57 | 1 UK | 2020-15 | 1 UK-Norther | 1 | 5 | 2.092493 | #####    |  |
| 58 | 1 UK | 2020-15 | 1 UK-Norther | 2 | 1 | 4.195065 | #####    |  |
| 59 | 1 UK | 2020-15 | 1 UK-Norther | 2 | 3 | 5        | 1.571454 |  |
| 60 | 1 UK | 2020-15 | 1 UK-Norther | 2 | 3 | 5        | 1.571454 |  |

|    |      |         |              |   |   |          |          |  |
|----|------|---------|--------------|---|---|----------|----------|--|
| 1  |      |         |              |   |   |          |          |  |
| 2  |      |         |              |   |   |          |          |  |
| 3  | 1 UK | 2020-15 | 1 UK-Norther | 2 | 4 | 5.2      | 1.45027  |  |
| 4  | 1 UK | 2020-15 | 1 UK-Norther | 2 | 5 | 1.555556 | #####    |  |
| 5  | 1 UK | 2020-15 | 1 UK-Norther | 3 | 1 | 2.422723 | #####    |  |
| 6  | 1 UK | 2020-15 | 1 UK-Norther | 3 | 4 | 2.363636 | #####    |  |
| 7  | 1 UK | 2020-15 | 1 UK-Norther | 3 | 5 | 2.5      | #####    |  |
| 8  | 1 UK | 2020-15 | 1 UK-Overall | 1 | 1 | 3.508163 | #####    |  |
| 9  | 1 UK | 2020-15 | 1 UK-Overall | 1 | 2 | 4.901856 | #####    |  |
| 10 | 1 UK | 2020-15 | 1 UK-Overall | 1 | 3 | 3.823334 | #####    |  |
| 11 | 1 UK | 2020-15 | 1 UK-Overall | 1 | 4 | 3.723963 | #####    |  |
| 12 | 1 UK | 2020-15 | 1 UK-Overall | 1 | 5 | 2.061785 | #####    |  |
| 13 | 1 UK | 2020-15 | 1 UK-Overall | 2 | 1 | 3.639996 | #####    |  |
| 14 | 1 UK | 2020-15 | 1 UK-Overall | 2 | 2 | 4.950963 | 1.04855  |  |
| 15 | 1 UK | 2020-15 | 1 UK-Overall | 2 | 3 | 3.836839 | #####    |  |
| 16 | 1 UK | 2020-15 | 1 UK-Overall | 2 | 4 | 3.981285 | #####    |  |
| 17 | 1 UK | 2020-15 | 1 UK-Overall | 2 | 5 | 1.81567  | #####    |  |
| 18 | 1 UK | 2020-15 | 1 UK-Overall | 3 | 1 | 3.325042 | #####    |  |
| 19 | 1 UK | 2020-15 | 1 UK-Overall | 3 | 2 | 4.720399 | #####    |  |
| 20 | 1 UK | 2020-15 | 1 UK-Overall | 3 | 3 | 3.803398 | #####    |  |
| 21 | 1 UK | 2020-15 | 1 UK-Overall | 3 | 4 | 3.425606 | #####    |  |
| 22 | 1 UK | 2020-15 | 1 UK-Overall | 3 | 5 | 2.31939  | #####    |  |
| 23 | 1 UK | 2020-15 | 1 UK-Scotlan | 1 | 1 | 3.182537 | #####    |  |
| 24 | 1 UK | 2020-15 | 1 UK-Scotlan | 1 | 2 | 5.0029   | 1.260617 |  |
| 25 | 1 UK | 2020-15 | 1 UK-Scotlan | 1 | 3 | 3.112948 | #####    |  |
| 26 | 1 UK | 2020-15 | 1 UK-Scotlan | 1 | 4 | 3.377839 | #####    |  |
| 27 | 1 UK | 2020-15 | 1 UK-Scotlan | 1 | 5 | 1.944145 | #####    |  |
| 28 | 1 UK | 2020-15 | 1 UK-Scotlan | 2 | 1 | 3.712127 | #####    |  |
| 29 | 1 UK | 2020-15 | 1 UK-Scotlan | 2 | 2 | 5.2      | 1.74253  |  |
| 30 | 1 UK | 2020-15 | 1 UK-Scotlan | 2 | 3 | 3.741935 | #####    |  |
| 31 | 1 UK | 2020-15 | 1 UK-Scotlan | 2 | 4 | 4.268293 | 1.181446 |  |
| 32 | 1 UK | 2020-15 | 1 UK-Scotlan | 2 | 5 | 1.703704 | #####    |  |
| 33 | 1 UK | 2020-15 | 1 UK-Scotlan | 3 | 1 | 2.494304 | #####    |  |
| 34 | 1 UK | 2020-15 | 1 UK-Scotlan | 3 | 2 | 4.5      | #####    |  |
| 35 | 1 UK | 2020-15 | 1 UK-Scotlan | 3 | 3 | 2.3      | #####    |  |
| 36 | 1 UK | 2020-15 | 1 UK-Scotlan | 3 | 4 | 2.375    | #####    |  |
| 37 | 1 UK | 2020-15 | 1 UK-Scotlan | 3 | 5 | 2.210526 | #####    |  |
| 38 | 1 UK | 2020-15 | 1 UK-Wales   | 1 | 1 | 3.493934 | #####    |  |
| 39 | 1 UK | 2020-15 | 1 UK-Wales   | 1 | 2 | 4.75     | 2.161598 |  |
| 40 | 1 UK | 2020-15 | 1 UK-Wales   | 1 | 3 | 3.987304 | 1.016414 |  |
| 41 | 1 UK | 2020-15 | 1 UK-Wales   | 1 | 4 | 3.761489 | #####    |  |
| 42 | 1 UK | 2020-15 | 1 UK-Wales   | 1 | 5 | 2.276159 | #####    |  |
| 43 | 1 UK | 2020-15 | 1 UK-Wales   | 2 | 1 | 3.739816 | #####    |  |
| 44 | 1 UK | 2020-15 | 1 UK-Wales   | 2 | 2 | 4.75     | 2.161598 |  |
| 45 | 1 UK | 2020-15 | 1 UK-Wales   | 2 | 3 | 5.1875   | 1.314726 |  |
| 46 | 1 UK | 2020-15 | 1 UK-Wales   | 2 | 4 | 3.666667 | #####    |  |
| 47 | 1 UK | 2020-15 | 1 UK-Wales   | 2 | 5 | 2.041667 | #####    |  |
| 48 | 1 UK | 2020-15 | 1 UK-Wales   | 3 | 1 | 3.111207 | #####    |  |
| 49 | 1 UK | 2020-15 | 1 UK-Wales   | 3 | 3 | 1.666667 | #####    |  |
| 50 | 1 UK | 2020-15 | 1 UK-Wales   | 3 | 4 | 3.863636 | 1.087749 |  |
| 51 | 1 UK | 2020-15 | 1 UK-Wales   | 3 | 5 | 2.636364 | #####    |  |
| 52 | 1 UK | 2020-15 | 2 UK-Englan  | 1 | 1 | 1.916578 | #####    |  |
| 53 | 1 UK | 2020-15 | 2 UK-Englan  | 1 | 2 | 2.919928 | #####    |  |
| 54 | 1 UK | 2020-15 | 2 UK-Englan  | 1 | 3 | 2.117638 | #####    |  |
| 55 | 1 UK | 2020-15 | 2 UK-Englan  | 1 | 4 | 1.732292 | #####    |  |
| 56 | 1 UK | 2020-15 | 2 UK-Englan  | 1 | 5 | 1.290191 | #####    |  |
| 57 | 1 UK | 2020-15 | 2 UK-Englan  | 2 | 1 | 1.825412 | #####    |  |
| 58 | 1 UK | 2020-15 | 2 UK-Englan  | 2 | 2 | 2.387097 | #####    |  |
| 59 | 1 UK | 2020-15 | 2 UK-Englan  | 2 | 2 | 2.387097 | #####    |  |
| 60 | 1 UK | 2020-15 | 2 UK-Englan  | 2 | 2 | 2.387097 | #####    |  |

|    |      |         |              |   |   |          |          |  |
|----|------|---------|--------------|---|---|----------|----------|--|
| 1  |      |         |              |   |   |          |          |  |
| 2  |      |         |              |   |   |          |          |  |
| 3  | 1 UK | 2020-15 | 2 UK-England | 2 | 3 | 2.261364 | #####    |  |
| 4  | 1 UK | 2020-15 | 2 UK-England | 2 | 4 | 1.440945 | #####    |  |
| 5  | 1 UK | 2020-15 | 2 UK-England | 2 | 5 | 1.116883 | #####    |  |
| 6  | 1 UK | 2020-15 | 2 UK-England | 3 | 1 | 2.037815 | #####    |  |
| 7  | 1 UK | 2020-15 | 2 UK-England | 3 | 2 | 4.75     | 1.023238 |  |
| 8  | 1 UK | 2020-15 | 2 UK-England | 3 | 3 | 1.923077 | #####    |  |
| 9  | 1 UK | 2020-15 | 2 UK-England | 3 | 4 | 2.067797 | #####    |  |
| 10 | 1 UK | 2020-15 | 2 UK-England | 3 | 5 | 1.460317 | #####    |  |
| 11 | 1 UK | 2020-15 | 2 UK-London  | 1 | 1 | 1.431129 | #####    |  |
| 12 | 1 UK | 2020-15 | 2 UK-London  | 1 | 2 | 3.2      | 1.75283  |  |
| 13 | 1 UK | 2020-15 | 2 UK-London  | 1 | 3 | 1.812741 | #####    |  |
| 14 | 1 UK | 2020-15 | 2 UK-London  | 1 | 4 | 1.006618 | #####    |  |
| 15 | 1 UK | 2020-15 | 2 UK-London  | 1 | 5 | #####    | #####    |  |
| 16 | 1 UK | 2020-15 | 2 UK-London  | 2 | 1 | 1.58787  | #####    |  |
| 17 | 1 UK | 2020-15 | 2 UK-London  | 2 | 2 | 3.2      | 1.75283  |  |
| 18 | 1 UK | 2020-15 | 2 UK-London  | 2 | 3 | 1.6875   | #####    |  |
| 19 | 1 UK | 2020-15 | 2 UK-London  | 2 | 4 | 1.333333 | #####    |  |
| 20 | 1 UK | 2020-15 | 2 UK-London  | 2 | 5 | 0.8125   | #####    |  |
| 21 | 1 UK | 2020-15 | 2 UK-London  | 3 | 1 | 1.179358 | #####    |  |
| 22 | 1 UK | 2020-15 | 2 UK-London  | 3 | 3 | 2        | #####    |  |
| 23 | 1 UK | 2020-15 | 2 UK-London  | 3 | 4 | #####    | #####    |  |
| 24 | 1 UK | 2020-15 | 2 UK-London  | 3 | 5 | 0.375    | #####    |  |
| 25 | 1 UK | 2020-15 | 2 UK-Norther | 1 | 1 | 1.699968 | #####    |  |
| 26 | 1 UK | 2020-15 | 2 UK-Norther | 1 | 3 | 2.111111 | #####    |  |
| 27 | 1 UK | 2020-15 | 2 UK-Norther | 1 | 4 | 1.572003 | #####    |  |
| 28 | 1 UK | 2020-15 | 2 UK-Norther | 1 | 5 | 1.639587 | #####    |  |
| 29 | 1 UK | 2020-15 | 2 UK-Norther | 2 | 1 | 1.584369 | #####    |  |
| 30 | 1 UK | 2020-15 | 2 UK-Norther | 2 | 3 | 2.111111 | #####    |  |
| 31 | 1 UK | 2020-15 | 2 UK-Norther | 2 | 4 | 1.5      | #####    |  |
| 32 | 1 UK | 2020-15 | 2 UK-Norther | 2 | 5 | 1        | #####    |  |
| 33 | 1 UK | 2020-15 | 2 UK-Norther | 3 | 1 | 1.848092 | #####    |  |
| 34 | 1 UK | 2020-15 | 2 UK-Norther | 3 | 4 | 1.636364 | #####    |  |
| 35 | 1 UK | 2020-15 | 2 UK-Norther | 3 | 5 | 2.125    | #####    |  |
| 36 | 1 UK | 2020-15 | 2 UK-Overall | 1 | 1 | 1.813937 | #####    |  |
| 37 | 1 UK | 2020-15 | 2 UK-Overall | 1 | 2 | 2.902514 | #####    |  |
| 38 | 1 UK | 2020-15 | 2 UK-Overall | 1 | 3 | 2.020397 | #####    |  |
| 39 | 1 UK | 2020-15 | 2 UK-Overall | 1 | 4 | 1.596776 | #####    |  |
| 40 | 1 UK | 2020-15 | 2 UK-Overall | 1 | 5 | 1.235888 | #####    |  |
| 41 | 1 UK | 2020-15 | 2 UK-Overall | 2 | 1 | 1.775488 | #####    |  |
| 42 | 1 UK | 2020-15 | 2 UK-Overall | 2 | 2 | 2.434339 | #####    |  |
| 43 | 1 UK | 2020-15 | 2 UK-Overall | 2 | 3 | 2.159411 | #####    |  |
| 44 | 1 UK | 2020-15 | 2 UK-Overall | 2 | 4 | 1.430622 | #####    |  |
| 45 | 1 UK | 2020-15 | 2 UK-Overall | 2 | 5 | 1.083278 | #####    |  |
| 46 | 1 UK | 2020-15 | 2 UK-Overall | 3 | 1 | 1.866196 | #####    |  |
| 47 | 1 UK | 2020-15 | 2 UK-Overall | 3 | 2 | 4.661197 | #####    |  |
| 48 | 1 UK | 2020-15 | 2 UK-Overall | 3 | 3 | 1.825998 | #####    |  |
| 49 | 1 UK | 2020-15 | 2 UK-Overall | 3 | 4 | 1.78702  | #####    |  |
| 50 | 1 UK | 2020-15 | 2 UK-Overall | 3 | 5 | 1.396145 | #####    |  |
| 51 | 1 UK | 2020-15 | 2 UK-Scotlan | 1 | 1 | 1.506264 | #####    |  |
| 52 | 1 UK | 2020-15 | 2 UK-Scotlan | 1 | 2 | 2.922357 | #####    |  |
| 53 | 1 UK | 2020-15 | 2 UK-Scotlan | 1 | 3 | 1.500192 | #####    |  |
| 54 | 1 UK | 2020-15 | 2 UK-Scotlan | 1 | 4 | 1.095441 | #####    |  |
| 55 | 1 UK | 2020-15 | 2 UK-Scotlan | 1 | 5 | 1.260117 | #####    |  |
| 56 | 1 UK | 2020-15 | 2 UK-Scotlan | 2 | 1 | 1.709716 | #####    |  |
| 57 | 1 UK | 2020-15 | 2 UK-Scotlan | 2 | 2 | 2.5      | #####    |  |
| 58 | 1 UK | 2020-15 | 2 UK-Scotlan | 2 | 3 | 2.0625   | #####    |  |
| 59 | 1 UK | 2020-15 | 2 UK-Scotlan | 2 |   |          |          |  |
| 60 | 1 UK | 2020-15 | 2 UK-Scotlan | 2 |   |          |          |  |

1  
2  
3  
4  
5  
6  
7  
8  
9  
10  
11  
12  
13  
14  
15  
16  
17  
18  
19  
20  
21  
22  
23  
24  
25  
26  
27  
28  
29  
30  
31  
32  
33  
34  
35  
36  
37  
38  
39  
40  
41  
42  
43  
44  
45  
46  
47  
48  
49  
50  
51  
52  
53  
54  
55  
56  
57  
58  
59  
60

|      |         |              |   |   |          |       |  |
|------|---------|--------------|---|---|----------|-------|--|
| 1 UK | 2020-15 | 2 UK-Scotlan | 2 | 4 | 1.214286 | ##### |  |
| 1 UK | 2020-15 | 2 UK-Scotlan | 2 | 5 | 1.222222 | ##### |  |
| 1 UK | 2020-15 | 2 UK-Scotlan | 3 | 1 | 1.248956 | ##### |  |
| 1 UK | 2020-15 | 2 UK-Scotlan | 3 | 2 | 4        | 0     |  |
| 1 UK | 2020-15 | 2 UK-Scotlan | 3 | 3 | #####    | ##### |  |
| 1 UK | 2020-15 | 2 UK-Scotlan | 3 | 4 | #####    | ##### |  |
| 1 UK | 2020-15 | 2 UK-Scotlan | 3 | 5 | 1.3      | ##### |  |
| 1 UK | 2020-15 | 2 UK-Wales   | 1 | 1 | 1.590283 | ##### |  |
| 1 UK | 2020-15 | 2 UK-Wales   | 1 | 2 | 1.5      | ##### |  |
| 1 UK | 2020-15 | 2 UK-Wales   | 1 | 3 | 1.813939 | ##### |  |
| 1 UK | 2020-15 | 2 UK-Wales   | 1 | 4 | 1.679982 | ##### |  |
| 1 UK | 2020-15 | 2 UK-Wales   | 1 | 5 | 1.276159 | ##### |  |
| 1 UK | 2020-15 | 2 UK-Wales   | 2 | 1 | 1.614017 | ##### |  |
| 1 UK | 2020-15 | 2 UK-Wales   | 2 | 2 | 1.5      | ##### |  |
| 1 UK | 2020-15 | 2 UK-Wales   | 2 | 3 | 2.0625   | ##### |  |
| 1 UK | 2020-15 | 2 UK-Wales   | 2 | 4 | 1.76087  | ##### |  |
| 1 UK | 2020-15 | 2 UK-Wales   | 2 | 5 | 1.041667 | ##### |  |
| 1 UK | 2020-15 | 2 UK-Wales   | 3 | 1 | 1.553034 | ##### |  |
| 1 UK | 2020-15 | 2 UK-Wales   | 3 | 3 | 1.333333 | ##### |  |
| 1 UK | 2020-15 | 2 UK-Wales   | 3 | 4 | 1.590909 | ##### |  |
| 1 UK | 2020-15 | 2 UK-Wales   | 3 | 5 | 1.636364 | ##### |  |
| 1 UK | 2020-15 | 3 UK-Englan  | 1 | 1 | #####    | ##### |  |
| 1 UK | 2020-15 | 3 UK-Englan  | 1 | 2 | 0        | 0     |  |
| 1 UK | 2020-15 | 3 UK-Englan  | 1 | 3 | 0        | 0     |  |
| 1 UK | 2020-15 | 3 UK-Englan  | 1 | 4 | #####    | ##### |  |
| 1 UK | 2020-15 | 3 UK-Englan  | 1 | 5 | #####    | ##### |  |
| 1 UK | 2020-15 | 3 UK-Englan  | 2 | 1 | #####    | ##### |  |
| 1 UK | 2020-15 | 3 UK-Englan  | 2 | 2 | 0        | 0     |  |
| 1 UK | 2020-15 | 3 UK-Englan  | 2 | 3 | 0        | 0     |  |
| 1 UK | 2020-15 | 3 UK-Englan  | 2 | 4 | #####    | ##### |  |
| 1 UK | 2020-15 | 3 UK-Englan  | 2 | 5 | #####    | ##### |  |
| 1 UK | 2020-15 | 3 UK-Englan  | 3 | 1 | #####    | ##### |  |
| 1 UK | 2020-15 | 3 UK-Englan  | 3 | 2 | 0        | 0     |  |
| 1 UK | 2020-15 | 3 UK-Englan  | 3 | 3 | 0        | 0     |  |
| 1 UK | 2020-15 | 3 UK-Englan  | 3 | 4 | 0        | 0     |  |
| 1 UK | 2020-15 | 3 UK-Englan  | 3 | 5 | #####    | ##### |  |
| 1 UK | 2020-15 | 3 UK-London  | 1 | 1 | 0        | 0     |  |
| 1 UK | 2020-15 | 3 UK-London  | 1 | 2 | 0        | 0     |  |
| 1 UK | 2020-15 | 3 UK-London  | 1 | 3 | 0        | 0     |  |
| 1 UK | 2020-15 | 3 UK-London  | 1 | 4 | 0        | 0     |  |
| 1 UK | 2020-15 | 3 UK-London  | 1 | 5 | 0        | 0     |  |
| 1 UK | 2020-15 | 3 UK-London  | 2 | 1 | 0        | 0     |  |
| 1 UK | 2020-15 | 3 UK-London  | 2 | 2 | 0        | 0     |  |
| 1 UK | 2020-15 | 3 UK-London  | 2 | 3 | 0        | 0     |  |
| 1 UK | 2020-15 | 3 UK-London  | 2 | 4 | 0        | 0     |  |
| 1 UK | 2020-15 | 3 UK-London  | 2 | 5 | 0        | 0     |  |
| 1 UK | 2020-15 | 3 UK-London  | 3 | 1 | 0        | 0     |  |
| 1 UK | 2020-15 | 3 UK-London  | 3 | 3 | 0        | 0     |  |
| 1 UK | 2020-15 | 3 UK-London  | 3 | 4 | 0        | 0     |  |
| 1 UK | 2020-15 | 3 UK-London  | 3 | 5 | 0        | 0     |  |
| 1 UK | 2020-15 | 3 UK-Norther | 1 | 1 | 0        | 0     |  |
| 1 UK | 2020-15 | 3 UK-Norther | 1 | 3 | 0        | 0     |  |
| 1 UK | 2020-15 | 3 UK-Norther | 1 | 4 | 0        | 0     |  |
| 1 UK | 2020-15 | 3 UK-Norther | 1 | 5 | 0        | 0     |  |
| 1 UK | 2020-15 | 3 UK-Norther | 2 | 1 | 0        | 0     |  |
| 1 UK | 2020-15 | 3 UK-Norther | 2 | 3 | 0        | 0     |  |



|    |      |         |              |   |   |          |          |  |
|----|------|---------|--------------|---|---|----------|----------|--|
| 1  |      |         |              |   |   |          |          |  |
| 2  |      |         |              |   |   |          |          |  |
| 3  | 1 UK | 2020-15 | 3 UK-Norther | 2 | 4 | 0        | 0        |  |
| 4  | 1 UK | 2020-15 | 3 UK-Norther | 2 | 5 | 0        | 0        |  |
| 5  | 1 UK | 2020-15 | 3 UK-Norther | 3 | 1 | 0        | 0        |  |
| 6  | 1 UK | 2020-15 | 3 UK-Norther | 3 | 4 | 0        | 0        |  |
| 7  | 1 UK | 2020-15 | 3 UK-Norther | 3 | 5 | 0        | 0        |  |
| 8  | 1 UK | 2020-15 | 3 UK-Overall | 1 | 1 | #####    | #####    |  |
| 9  | 1 UK | 2020-15 | 3 UK-Overall | 1 | 2 | 0        | 0        |  |
| 10 | 1 UK | 2020-15 | 3 UK-Overall | 1 | 3 | #####    | #####    |  |
| 11 | 1 UK | 2020-15 | 3 UK-Overall | 1 | 4 | #####    | #####    |  |
| 12 | 1 UK | 2020-15 | 3 UK-Overall | 1 | 5 | #####    | #####    |  |
| 13 | 1 UK | 2020-15 | 3 UK-Overall | 2 | 1 | #####    | #####    |  |
| 14 | 1 UK | 2020-15 | 3 UK-Overall | 2 | 2 | 0        | 0        |  |
| 15 | 1 UK | 2020-15 | 3 UK-Overall | 2 | 3 | #####    | #####    |  |
| 16 | 1 UK | 2020-15 | 3 UK-Overall | 2 | 4 | #####    | #####    |  |
| 17 | 1 UK | 2020-15 | 3 UK-Overall | 2 | 5 | #####    | #####    |  |
| 18 | 1 UK | 2020-15 | 3 UK-Overall | 3 | 1 | #####    | #####    |  |
| 19 | 1 UK | 2020-15 | 3 UK-Overall | 3 | 2 | 0        | 0        |  |
| 20 | 1 UK | 2020-15 | 3 UK-Overall | 3 | 3 | #####    | #####    |  |
| 21 | 1 UK | 2020-15 | 3 UK-Overall | 3 | 4 | 0        | 0        |  |
| 22 | 1 UK | 2020-15 | 3 UK-Overall | 3 | 5 | #####    | #####    |  |
| 23 | 1 UK | 2020-15 | 3 UK-Scotlan | 1 | 1 | #####    | #####    |  |
| 24 | 1 UK | 2020-15 | 3 UK-Scotlan | 1 | 2 | 0        | 0        |  |
| 25 | 1 UK | 2020-15 | 3 UK-Scotlan | 1 | 3 | #####    | #####    |  |
| 26 | 1 UK | 2020-15 | 3 UK-Scotlan | 1 | 4 | #####    | #####    |  |
| 27 | 1 UK | 2020-15 | 3 UK-Scotlan | 1 | 5 | 0        | 0        |  |
| 28 | 1 UK | 2020-15 | 3 UK-Scotlan | 2 | 1 | #####    | #####    |  |
| 29 | 1 UK | 2020-15 | 3 UK-Scotlan | 2 | 2 | 0        | 0        |  |
| 30 | 1 UK | 2020-15 | 3 UK-Scotlan | 2 | 3 | 0        | 0        |  |
| 31 | 1 UK | 2020-15 | 3 UK-Scotlan | 2 | 4 | #####    | #####    |  |
| 32 | 1 UK | 2020-15 | 3 UK-Scotlan | 2 | 5 | 0        | 0        |  |
| 33 | 1 UK | 2020-15 | 3 UK-Scotlan | 3 | 1 | #####    | #####    |  |
| 34 | 1 UK | 2020-15 | 3 UK-Scotlan | 3 | 2 | 0        | 0        |  |
| 35 | 1 UK | 2020-15 | 3 UK-Scotlan | 3 | 3 | #####    | #####    |  |
| 36 | 1 UK | 2020-15 | 3 UK-Scotlan | 3 | 4 | 0        | 0        |  |
| 37 | 1 UK | 2020-15 | 3 UK-Scotlan | 3 | 5 | 0        | 0        |  |
| 38 | 1 UK | 2020-15 | 3 UK-Wales   | 1 | 1 | #####    | #####    |  |
| 39 | 1 UK | 2020-15 | 3 UK-Wales   | 1 | 2 | 0        | 0        |  |
| 40 | 1 UK | 2020-15 | 3 UK-Wales   | 1 | 3 | #####    | #####    |  |
| 41 | 1 UK | 2020-15 | 3 UK-Wales   | 1 | 4 | #####    | #####    |  |
| 42 | 1 UK | 2020-15 | 3 UK-Wales   | 1 | 5 | #####    | #####    |  |
| 43 | 1 UK | 2020-15 | 3 UK-Wales   | 2 | 1 | #####    | #####    |  |
| 44 | 1 UK | 2020-15 | 3 UK-Wales   | 2 | 2 | 0        | 0        |  |
| 45 | 1 UK | 2020-15 | 3 UK-Wales   | 2 | 3 | 0.0625   | #####    |  |
| 46 | 1 UK | 2020-15 | 3 UK-Wales   | 2 | 4 | #####    | #####    |  |
| 47 | 1 UK | 2020-15 | 3 UK-Wales   | 2 | 5 | #####    | #####    |  |
| 48 | 1 UK | 2020-15 | 3 UK-Wales   | 3 | 1 | 0        | 0        |  |
| 49 | 1 UK | 2020-15 | 3 UK-Wales   | 3 | 3 | 0        | 0        |  |
| 50 | 1 UK | 2020-15 | 3 UK-Wales   | 3 | 4 | 0        | 0        |  |
| 51 | 1 UK | 2020-15 | 3 UK-Wales   | 3 | 5 | 0        | 0        |  |
| 52 | 1 UK | 2020-15 | 4 UK-Englan  | 1 | 1 | #####    | #####    |  |
| 53 | 1 UK | 2020-15 | 4 UK-Englan  | 1 | 2 | 1.84881  | #####    |  |
| 54 | 1 UK | 2020-15 | 4 UK-Englan  | 1 | 3 | #####    | #####    |  |
| 55 | 1 UK | 2020-15 | 4 UK-Englan  | 1 | 4 | 1.361443 | #####    |  |
| 56 | 1 UK | 2020-15 | 4 UK-Englan  | 1 | 5 | #####    | #####    |  |
| 57 | 1 UK | 2020-15 | 4 UK-Englan  | 2 | 1 | 1.261871 | #####    |  |
| 58 | 1 UK | 2020-15 | 4 UK-Englan  | 2 | 2 | 2.387097 | 1.147556 |  |
| 59 | 1 UK | 2020-15 | 4 UK-Englan  | 2 |   |          |          |  |
| 60 | 1 UK | 2020-15 | 4 UK-Englan  | 2 |   |          |          |  |

1  
2  
3  
4  
5  
6  
7  
8  
9  
10  
11  
12  
13  
14  
15  
16  
17  
18  
19  
20  
21  
22  
23  
24  
25  
26  
27  
28  
29  
30  
31  
32  
33  
34  
35  
36  
37  
38  
39  
40  
41  
42  
43  
44  
45  
46  
47  
48  
49  
50  
51  
52  
53  
54  
55  
56  
57  
58  
59  
60

|      |         |              |   |   |          |          |
|------|---------|--------------|---|---|----------|----------|
| 1 UK | 2020-15 | 4 UK-England | 2 | 3 | #####    | #####    |
| 1 UK | 2020-15 | 4 UK-England | 2 | 4 | 1.859504 | #####    |
| 1 UK | 2020-15 | 4 UK-England | 2 | 5 | #####    | #####    |
| 1 UK | 2020-15 | 4 UK-England | 3 | 1 | #####    | #####    |
| 1 UK | 2020-15 | 4 UK-England | 3 | 2 | 0        | 0        |
| 1 UK | 2020-15 | 4 UK-England | 3 | 3 | 1.12     | #####    |
| 1 UK | 2020-15 | 4 UK-England | 3 | 4 | #####    | #####    |
| 1 UK | 2020-15 | 4 UK-England | 3 | 5 | #####    | #####    |
| 1 UK | 2020-15 | 4 UK-London  | 1 | 1 | #####    | #####    |
| 1 UK | 2020-15 | 4 UK-London  | 1 | 2 | 0        | 0        |
| 1 UK | 2020-15 | 4 UK-London  | 1 | 3 | #####    | #####    |
| 1 UK | 2020-15 | 4 UK-London  | 1 | 4 | #####    | #####    |
| 1 UK | 2020-15 | 4 UK-London  | 1 | 5 | 0        | 0        |
| 1 UK | 2020-15 | 4 UK-London  | 2 | 1 | #####    | #####    |
| 1 UK | 2020-15 | 4 UK-London  | 2 | 2 | 0        | 0        |
| 1 UK | 2020-15 | 4 UK-London  | 2 | 3 | 0.1875   | #####    |
| 1 UK | 2020-15 | 4 UK-London  | 2 | 4 | 0.625    | #####    |
| 1 UK | 2020-15 | 4 UK-London  | 2 | 5 | 0        | 0        |
| 1 UK | 2020-15 | 4 UK-London  | 3 | 1 | 0        | 0        |
| 1 UK | 2020-15 | 4 UK-London  | 3 | 3 | 0        | 0        |
| 1 UK | 2020-15 | 4 UK-London  | 3 | 4 | 0        | 0        |
| 1 UK | 2020-15 | 4 UK-London  | 3 | 5 | 0        | 0        |
| 1 UK | 2020-15 | 4 UK-Norther | 1 | 1 | #####    | #####    |
| 1 UK | 2020-15 | 4 UK-Norther | 1 | 3 | 2.222222 | 1.593131 |
| 1 UK | 2020-15 | 4 UK-Norther | 1 | 4 | #####    | #####    |
| 1 UK | 2020-15 | 4 UK-Norther | 1 | 5 | #####    | #####    |
| 1 UK | 2020-15 | 4 UK-Norther | 2 | 1 | 1.502491 | #####    |
| 1 UK | 2020-15 | 4 UK-Norther | 2 | 3 | 2.222222 | 1.593131 |
| 1 UK | 2020-15 | 4 UK-Norther | 2 | 4 | 1.7      | #####    |
| 1 UK | 2020-15 | 4 UK-Norther | 2 | 5 | #####    | #####    |
| 1 UK | 2020-15 | 4 UK-Norther | 3 | 1 | #####    | #####    |
| 1 UK | 2020-15 | 4 UK-Norther | 3 | 4 | #####    | #####    |
| 1 UK | 2020-15 | 4 UK-Norther | 3 | 5 | 0        | 0        |
| 1 UK | 2020-15 | 4 UK-Overall | 1 | 1 | #####    | #####    |
| 1 UK | 2020-15 | 4 UK-Overall | 1 | 2 | 1.731704 | #####    |
| 1 UK | 2020-15 | 4 UK-Overall | 1 | 3 | #####    | #####    |
| 1 UK | 2020-15 | 4 UK-Overall | 1 | 4 | 1.235768 | #####    |
| 1 UK | 2020-15 | 4 UK-Overall | 1 | 5 | #####    | #####    |
| 1 UK | 2020-15 | 4 UK-Overall | 2 | 1 | 1.169377 | #####    |
| 1 UK | 2020-15 | 4 UK-Overall | 2 | 2 | 2.200353 | #####    |
| 1 UK | 2020-15 | 4 UK-Overall | 2 | 3 | #####    | #####    |
| 1 UK | 2020-15 | 4 UK-Overall | 2 | 4 | 1.718289 | #####    |
| 1 UK | 2020-15 | 4 UK-Overall | 2 | 5 | #####    | #####    |
| 1 UK | 2020-15 | 4 UK-Overall | 3 | 1 | #####    | #####    |
| 1 UK | 2020-15 | 4 UK-Overall | 3 | 2 | 0        | 0        |
| 1 UK | 2020-15 | 4 UK-Overall | 3 | 3 | #####    | #####    |
| 1 UK | 2020-15 | 4 UK-Overall | 3 | 4 | #####    | #####    |
| 1 UK | 2020-15 | 4 UK-Overall | 3 | 5 | #####    | #####    |
| 1 UK | 2020-15 | 4 UK-Scotlan | 1 | 1 | 1.021822 | #####    |
| 1 UK | 2020-15 | 4 UK-Scotlan | 1 | 2 | 1.293172 | 1.2589   |
| 1 UK | 2020-15 | 4 UK-Scotlan | 1 | 3 | 1.33575  | #####    |
| 1 UK | 2020-15 | 4 UK-Scotlan | 1 | 4 | 1.247776 | #####    |
| 1 UK | 2020-15 | 4 UK-Scotlan | 1 | 5 | #####    | #####    |
| 1 UK | 2020-15 | 4 UK-Scotlan | 2 | 1 | 1.409431 | #####    |
| 1 UK | 2020-15 | 4 UK-Scotlan | 2 | 2 | 1.8      | 1.707745 |
| 1 UK | 2020-15 | 4 UK-Scotlan | 2 | 3 | 1.4375   | #####    |

|    |      |         |              |   |   |          |          |         |
|----|------|---------|--------------|---|---|----------|----------|---------|
| 1  |      |         |              |   |   |          |          |         |
| 2  |      |         |              |   |   |          |          |         |
| 3  | 1 UK | 2020-15 | 4 UK-Scotlan | 2 | 4 | 2.170732 | #####    |         |
| 4  | 1 UK | 2020-15 | 4 UK-Scotlan | 2 | 5 | 0        |          | 0       |
| 5  | 1 UK | 2020-15 | 4 UK-Scotlan | 3 | 1 | #####    | #####    |         |
| 6  | 1 UK | 2020-15 | 4 UK-Scotlan | 3 | 2 | 0        |          | 0       |
| 7  | 1 UK | 2020-15 | 4 UK-Scotlan | 3 | 3 | 1.2      | #####    |         |
| 8  | 1 UK | 2020-15 | 4 UK-Scotlan | 3 | 4 | #####    | #####    |         |
| 9  | 1 UK | 2020-15 | 4 UK-Scotlan | 3 | 5 | 0.25     | #####    |         |
| 10 | 1 UK | 2020-15 | 4 UK-Wales   | 1 | 1 | 1.196106 | #####    |         |
| 11 | 1 UK | 2020-15 | 4 UK-Wales   | 1 | 2 | 3        | 2.598251 |         |
| 12 | 1 UK | 2020-15 | 4 UK-Wales   | 1 | 3 | 1.153453 | #####    |         |
| 13 | 1 UK | 2020-15 | 4 UK-Wales   | 1 | 4 | 1.431949 | #####    |         |
| 14 | 1 UK | 2020-15 | 4 UK-Wales   | 1 | 5 | #####    | #####    |         |
| 15 | 1 UK | 2020-15 | 4 UK-Wales   | 2 | 1 | 1.380903 | #####    |         |
| 16 | 1 UK | 2020-15 | 4 UK-Wales   | 2 | 2 | 3        | 2.598251 |         |
| 17 | 1 UK | 2020-15 | 4 UK-Wales   | 2 | 3 | 1.75     | #####    |         |
| 18 | 1 UK | 2020-15 | 4 UK-Wales   | 2 | 4 | 1.2      | #####    |         |
| 19 | 1 UK | 2020-15 | 4 UK-Wales   | 2 | 5 | #####    | #####    |         |
| 20 | 1 UK | 2020-15 | 4 UK-Wales   | 3 | 1 | #####    | #####    |         |
| 21 | 1 UK | 2020-15 | 4 UK-Wales   | 3 | 3 | 0        |          | 0       |
| 22 | 1 UK | 2020-15 | 4 UK-Wales   | 3 | 3 | 0        |          | 0       |
| 23 | 1 UK | 2020-15 | 4 UK-Wales   | 3 | 4 | 1.681818 | #####    |         |
| 24 | 1 UK | 2020-15 | 4 UK-Wales   | 3 | 5 | 0        |          | 0       |
| 25 | 1 UK | 2020-15 | 5 UK-Englan  | 1 | 1 | #####    | #####    |         |
| 26 | 1 UK | 2020-15 | 5 UK-Englan  | 1 | 2 | #####    | #####    |         |
| 27 | 1 UK | 2020-15 | 5 UK-Englan  | 1 | 3 | #####    | #####    |         |
| 28 | 1 UK | 2020-15 | 5 UK-Englan  | 1 | 4 | #####    | #####    |         |
| 29 | 1 UK | 2020-15 | 5 UK-Englan  | 1 | 5 | #####    | #####    |         |
| 30 | 1 UK | 2020-15 | 5 UK-Englan  | 2 | 1 | #####    | #####    |         |
| 31 | 1 UK | 2020-15 | 5 UK-Englan  | 2 | 2 | #####    | #####    |         |
| 32 | 1 UK | 2020-15 | 5 UK-Englan  | 2 | 3 | #####    | #####    |         |
| 33 | 1 UK | 2020-15 | 5 UK-Englan  | 2 | 4 | #####    | #####    |         |
| 34 | 1 UK | 2020-15 | 5 UK-Englan  | 2 | 5 | #####    | #####    |         |
| 35 | 1 UK | 2020-15 | 5 UK-Englan  | 3 | 1 | #####    | #####    |         |
| 36 | 1 UK | 2020-15 | 5 UK-Englan  | 3 | 2 | 0        |          | 0       |
| 37 | 1 UK | 2020-15 | 5 UK-Englan  | 3 | 3 | 1.111111 | #####    |         |
| 38 | 1 UK | 2020-15 | 5 UK-Englan  | 3 | 4 | 1.070175 | #####    |         |
| 39 | 1 UK | 2020-15 | 5 UK-Englan  | 3 | 5 | #####    | #####    |         |
| 40 | 1 UK | 2020-15 | 5 UK-London  | 1 | 1 | #####    | #####    |         |
| 41 | 1 UK | 2020-15 | 5 UK-London  | 1 | 2 | 4.4      |          | 3.49423 |
| 42 | 1 UK | 2020-15 | 5 UK-London  | 1 | 3 | #####    | #####    |         |
| 43 | 1 UK | 2020-15 | 5 UK-London  | 1 | 4 | #####    | #####    |         |
| 44 | 1 UK | 2020-15 | 5 UK-London  | 1 | 5 | #####    | #####    |         |
| 45 | 1 UK | 2020-15 | 5 UK-London  | 2 | 1 | #####    | #####    |         |
| 46 | 1 UK | 2020-15 | 5 UK-London  | 2 | 2 | 4.4      |          | 3.49423 |
| 47 | 1 UK | 2020-15 | 5 UK-London  | 2 | 3 | 0.75     | #####    |         |
| 48 | 1 UK | 2020-15 | 5 UK-London  | 2 | 4 | 0.5      | #####    |         |
| 49 | 1 UK | 2020-15 | 5 UK-London  | 2 | 5 | #####    | #####    |         |
| 50 | 1 UK | 2020-15 | 5 UK-London  | 3 | 1 | #####    | #####    |         |
| 51 | 1 UK | 2020-15 | 5 UK-London  | 3 | 3 | 0.2      | #####    |         |
| 52 | 1 UK | 2020-15 | 5 UK-London  | 3 | 4 | #####    | #####    |         |
| 53 | 1 UK | 2020-15 | 5 UK-London  | 3 | 5 | 1.5      | #####    |         |
| 54 | 1 UK | 2020-15 | 5 UK-Norther | 1 | 1 | #####    | #####    |         |
| 55 | 1 UK | 2020-15 | 5 UK-Norther | 1 | 3 | #####    | #####    |         |
| 56 | 1 UK | 2020-15 | 5 UK-Norther | 1 | 4 | 1.183962 | #####    |         |
| 57 | 1 UK | 2020-15 | 5 UK-Norther | 1 | 5 | #####    | #####    |         |
| 58 | 1 UK | 2020-15 | 5 UK-Norther | 2 | 1 | 1.108205 | #####    |         |
| 59 | 1 UK | 2020-15 | 5 UK-Norther | 2 | 3 | #####    | #####    |         |
| 60 | 1 UK | 2020-15 | 5 UK-Norther | 2 | 3 | #####    | #####    |         |

1  
2  
3  
4  
5  
6  
7  
8  
9  
10  
11  
12  
13  
14  
15  
16  
17  
18  
19  
20  
21  
22  
23  
24  
25  
26  
27  
28  
29  
30  
31  
32  
33  
34  
35  
36  
37  
38  
39  
40  
41  
42  
43  
44  
45  
46  
47  
48  
49  
50  
51  
52  
53  
54  
55  
56  
57  
58  
59  
60

|      |         |              |   |   |          |          |
|------|---------|--------------|---|---|----------|----------|
| 1 UK | 2020-15 | 5 UK-Norther | 2 | 4 | 2        | #####    |
| 1 UK | 2020-15 | 5 UK-Norther | 2 | 5 | #####    | #####    |
| 1 UK | 2020-15 | 5 UK-Norther | 3 | 1 | #####    | #####    |
| 1 UK | 2020-15 | 5 UK-Norther | 3 | 4 | #####    | #####    |
| 1 UK | 2020-15 | 5 UK-Norther | 3 | 5 | 0.375    | #####    |
| 1 UK | 2020-15 | 5 UK-Overall | 1 | 1 | #####    | #####    |
| 1 UK | 2020-15 | 5 UK-Overall | 1 | 2 | #####    | #####    |
| 1 UK | 2020-15 | 5 UK-Overall | 1 | 3 | #####    | #####    |
| 1 UK | 2020-15 | 5 UK-Overall | 1 | 4 | #####    | #####    |
| 1 UK | 2020-15 | 5 UK-Overall | 1 | 5 | #####    | #####    |
| 1 UK | 2020-15 | 5 UK-Overall | 2 | 1 | #####    | #####    |
| 1 UK | 2020-15 | 5 UK-Overall | 2 | 2 | #####    | #####    |
| 1 UK | 2020-15 | 5 UK-Overall | 2 | 3 | #####    | #####    |
| 1 UK | 2020-15 | 5 UK-Overall | 2 | 4 | #####    | #####    |
| 1 UK | 2020-15 | 5 UK-Overall | 2 | 5 | #####    | #####    |
| 1 UK | 2020-15 | 5 UK-Overall | 3 | 1 | #####    | #####    |
| 1 UK | 2020-15 | 5 UK-Overall | 3 | 2 | #####    | #####    |
| 1 UK | 2020-15 | 5 UK-Overall | 3 | 3 | #####    | #####    |
| 1 UK | 2020-15 | 5 UK-Overall | 3 | 4 | #####    | #####    |
| 1 UK | 2020-15 | 5 UK-Overall | 3 | 5 | #####    | #####    |
| 1 UK | 2020-15 | 5 UK-Scotlan | 1 | 1 | #####    | #####    |
| 1 UK | 2020-15 | 5 UK-Scotlan | 1 | 2 | #####    | #####    |
| 1 UK | 2020-15 | 5 UK-Scotlan | 1 | 3 | #####    | #####    |
| 1 UK | 2020-15 | 5 UK-Scotlan | 1 | 4 | #####    | #####    |
| 1 UK | 2020-15 | 5 UK-Scotlan | 1 | 5 | #####    | #####    |
| 1 UK | 2020-15 | 5 UK-Scotlan | 2 | 1 | #####    | #####    |
| 1 UK | 2020-15 | 5 UK-Scotlan | 2 | 2 | 0.9      | #####    |
| 1 UK | 2020-15 | 5 UK-Scotlan | 2 | 3 | #####    | #####    |
| 1 UK | 2020-15 | 5 UK-Scotlan | 2 | 4 | #####    | #####    |
| 1 UK | 2020-15 | 5 UK-Scotlan | 2 | 5 | #####    | #####    |
| 1 UK | 2020-15 | 5 UK-Scotlan | 3 | 1 | #####    | #####    |
| 1 UK | 2020-15 | 5 UK-Scotlan | 3 | 2 | 0.5      | #####    |
| 1 UK | 2020-15 | 5 UK-Scotlan | 3 | 3 | #####    | #####    |
| 1 UK | 2020-15 | 5 UK-Scotlan | 3 | 4 | 1.208333 | #####    |
| 1 UK | 2020-15 | 5 UK-Scotlan | 3 | 5 | #####    | #####    |
| 1 UK | 2020-15 | 5 UK-Wales   | 1 | 1 | #####    | #####    |
| 1 UK | 2020-15 | 5 UK-Wales   | 1 | 2 | 0.25     | #####    |
| 1 UK | 2020-15 | 5 UK-Wales   | 1 | 3 | #####    | #####    |
| 1 UK | 2020-15 | 5 UK-Wales   | 1 | 4 | #####    | #####    |
| 1 UK | 2020-15 | 5 UK-Wales   | 1 | 5 | #####    | #####    |
| 1 UK | 2020-15 | 5 UK-Wales   | 2 | 1 | #####    | #####    |
| 1 UK | 2020-15 | 5 UK-Wales   | 2 | 2 | 0.25     | #####    |
| 1 UK | 2020-15 | 5 UK-Wales   | 2 | 3 | 1.3125   | #####    |
| 1 UK | 2020-15 | 5 UK-Wales   | 2 | 4 | #####    | #####    |
| 1 UK | 2020-15 | 5 UK-Wales   | 2 | 5 | #####    | #####    |
| 1 UK | 2020-15 | 5 UK-Wales   | 3 | 1 | #####    | #####    |
| 1 UK | 2020-15 | 5 UK-Wales   | 3 | 3 | #####    | #####    |
| 1 UK | 2020-15 | 5 UK-Wales   | 3 | 4 | #####    | #####    |
| 1 UK | 2020-15 | 5 UK-Wales   | 3 | 5 | 1        | #####    |
| 1 US | 2020-11 | 1 US-Midwes  | 1 | 1 | 9.368599 | #####    |
| 1 US | 2020-11 | 1 US-Midwes  | 1 | 2 | 9.996467 | 1.190221 |
| 1 US | 2020-11 | 1 US-Midwes  | 1 | 3 | 10.28844 | #####    |
| 1 US | 2020-11 | 1 US-Midwes  | 1 | 4 | 9.73625  | #####    |
| 1 US | 2020-11 | 1 US-Midwes  | 1 | 5 | 6.618681 | #####    |
| 1 US | 2020-11 | 1 US-Midwes  | 2 | 1 | 8.512527 | #####    |
| 1 US | 2020-11 | 1 US-Midwes  | 2 | 2 | 9.738095 | 1.369489 |

|    |      |         |              |   |   |          |          |
|----|------|---------|--------------|---|---|----------|----------|
| 1  |      |         |              |   |   |          |          |
| 2  |      |         |              |   |   |          |          |
| 3  | 1 US | 2020-11 | 1 US-Midwes  | 2 | 3 | 10.12698 | 1.154636 |
| 4  | 1 US | 2020-11 | 1 US-Midwes  | 2 | 4 | 8.905405 | 1.040173 |
| 5  | 1 US | 2020-11 | 1 US-Midwes  | 2 | 5 | 4.245902 | #####    |
| 6  | 1 US | 2020-11 | 1 US-Midwes  | 3 | 1 | 10.01876 | #####    |
| 7  | 1 US | 2020-11 | 1 US-Midwes  | 3 | 2 | 10.26667 | 1.967517 |
| 8  | 1 US | 2020-11 | 1 US-Midwes  | 3 | 3 | 10.39024 | 1.458129 |
| 9  | 1 US | 2020-11 | 1 US-Midwes  | 3 | 4 | 10.28571 | 1.095516 |
| 10 | 1 US | 2020-11 | 1 US-Midwes  | 3 | 5 | 8.640625 | 1.053396 |
| 11 | 1 US | 2020-11 | 1 US-Northea | 1 | 1 | 10.01435 | #####    |
| 12 | 1 US | 2020-11 | 1 US-Northea | 1 | 2 | 9.012185 | 1.765436 |
| 13 | 1 US | 2020-11 | 1 US-Northea | 1 | 3 | 13.80581 | 1.662605 |
| 14 | 1 US | 2020-11 | 1 US-Northea | 1 | 4 | 7.971279 | #####    |
| 15 | 1 US | 2020-11 | 1 US-Northea | 1 | 5 | 7.054037 | 1.029336 |
| 16 | 1 US | 2020-11 | 1 US-Northea | 2 | 1 | 8.002819 | #####    |
| 17 | 1 US | 2020-11 | 1 US-Northea | 2 | 2 | 7.7      | #####    |
| 18 | 1 US | 2020-11 | 1 US-Northea | 2 | 3 | 9.784314 | 1.341526 |
| 19 | 1 US | 2020-11 | 1 US-Northea | 2 | 4 | 7.195652 | 1.419813 |
| 20 | 1 US | 2020-11 | 1 US-Northea | 2 | 5 | 6.708333 | 1.140738 |
| 21 | 1 US | 2020-11 | 1 US-Northea | 3 | 1 | 11.79131 | 1.352284 |
| 22 | 1 US | 2020-11 | 1 US-Northea | 3 | 2 | 10.36364 | 3.431333 |
| 23 | 1 US | 2020-11 | 1 US-Northea | 3 | 3 | 16.81481 | 2.632101 |
| 24 | 1 US | 2020-11 | 1 US-Northea | 3 | 4 | 8.431373 | 1.245805 |
| 25 | 1 US | 2020-11 | 1 US-Northea | 3 | 5 | 7.818182 | 2.126888 |
| 26 | 1 US | 2020-11 | 1 US-Overall | 1 | 1 | 9.237888 | #####    |
| 27 | 1 US | 2020-11 | 1 US-Overall | 1 | 2 | 9.007062 | #####    |
| 28 | 1 US | 2020-11 | 1 US-Overall | 1 | 3 | 11.36842 | #####    |
| 29 | 1 US | 2020-11 | 1 US-Overall | 1 | 4 | 8.826456 | #####    |
| 30 | 1 US | 2020-11 | 1 US-Overall | 1 | 5 | 6.459797 | #####    |
| 31 | 1 US | 2020-11 | 1 US-Overall | 2 | 1 | 8.136998 | #####    |
| 32 | 1 US | 2020-11 | 1 US-Overall | 2 | 2 | 9.505577 | #####    |
| 33 | 1 US | 2020-11 | 1 US-Overall | 2 | 3 | 9.678003 | #####    |
| 34 | 1 US | 2020-11 | 1 US-Overall | 2 | 4 | 7.743819 | #####    |
| 35 | 1 US | 2020-11 | 1 US-Overall | 2 | 5 | 5.09825  | #####    |
| 36 | 1 US | 2020-11 | 1 US-Overall | 3 | 1 | 10.22577 | #####    |
| 37 | 1 US | 2020-11 | 1 US-Overall | 3 | 2 | 8.569636 | 1.298205 |
| 38 | 1 US | 2020-11 | 1 US-Overall | 3 | 3 | 12.69176 | 1.083953 |
| 39 | 1 US | 2020-11 | 1 US-Overall | 3 | 4 | 9.761716 | #####    |
| 40 | 1 US | 2020-11 | 1 US-Overall | 3 | 5 | 8.137462 | #####    |
| 41 | 1 US | 2020-11 | 1 US-South   | 1 | 1 | 8.92598  | #####    |
| 42 | 1 US | 2020-11 | 1 US-South   | 1 | 2 | 8.652979 | 1.505114 |
| 43 | 1 US | 2020-11 | 1 US-South   | 1 | 3 | 11.03958 | 1.455728 |
| 44 | 1 US | 2020-11 | 1 US-South   | 1 | 4 | 8.643795 | #####    |
| 45 | 1 US | 2020-11 | 1 US-South   | 1 | 5 | 6.666075 | #####    |
| 46 | 1 US | 2020-11 | 1 US-South   | 2 | 1 | 7.580757 | #####    |
| 47 | 1 US | 2020-11 | 1 US-South   | 2 | 2 | 8.88     | 1.271673 |
| 48 | 1 US | 2020-11 | 1 US-South   | 2 | 3 | 9.035714 | 1.163906 |
| 49 | 1 US | 2020-11 | 1 US-South   | 2 | 4 | 7.5      | #####    |
| 50 | 1 US | 2020-11 | 1 US-South   | 2 | 5 | 4.966292 | #####    |
| 51 | 1 US | 2020-11 | 1 US-South   | 3 | 1 | 10.29128 | 1.124449 |
| 52 | 1 US | 2020-11 | 1 US-South   | 3 | 2 | 8.5      | 2.368574 |
| 53 | 1 US | 2020-11 | 1 US-South   | 3 | 3 | 13       | 2.593511 |
| 54 | 1 US | 2020-11 | 1 US-South   | 3 | 4 | 10       | 1.5553   |
| 55 | 1 US | 2020-11 | 1 US-South   | 3 | 5 | 9        | 1.08981  |
| 56 | 1 US | 2020-11 | 1 US-West    | 1 | 1 | 9.108718 | #####    |
| 57 | 1 US | 2020-11 | 1 US-West    | 1 | 2 | 8.697983 | 1.392415 |
| 58 | 1 US | 2020-11 | 1 US-West    | 1 | 3 | 11.14548 | #####    |
| 59 | 1 US | 2020-11 | 1 US-West    | 1 |   |          |          |
| 60 | 1 US | 2020-11 | 1 US-West    | 1 |   |          |          |

|    |      |         |              |   |   |          |          |  |
|----|------|---------|--------------|---|---|----------|----------|--|
| 1  |      |         |              |   |   |          |          |  |
| 2  |      |         |              |   |   |          |          |  |
| 3  | 1 US | 2020-11 | 1 US-West    | 1 | 4 | 8.852234 | #####    |  |
| 4  | 1 US | 2020-11 | 1 US-West    | 1 | 5 | 5.596906 | #####    |  |
| 5  | 1 US | 2020-11 | 1 US-West    | 2 | 1 | 8.817189 | #####    |  |
| 6  | 1 US | 2020-11 | 1 US-West    | 2 | 2 | 11.4     | 1.866732 |  |
| 7  | 1 US | 2020-11 | 1 US-West    | 2 | 3 | 10.22857 | 1.080703 |  |
| 8  | 1 US | 2020-11 | 1 US-West    | 2 | 4 | 7.56962  | #####    |  |
| 9  | 1 US | 2020-11 | 1 US-West    | 2 | 5 | 4.946667 | #####    |  |
| 10 | 1 US | 2020-11 | 1 US-West    | 3 | 1 | 9.36172  | #####    |  |
| 11 | 1 US | 2020-11 | 1 US-West    | 3 | 2 | 5.933333 | 1.886793 |  |
| 12 | 1 US | 2020-11 | 1 US-West    | 3 | 3 | 11.8     | 1.509282 |  |
| 13 | 1 US | 2020-11 | 1 US-West    | 3 | 4 | 9.967742 | 1.32969  |  |
| 14 | 1 US | 2020-11 | 1 US-West    | 3 | 5 | 6.292308 | #####    |  |
| 15 | 1 US | 2020-11 | 2 US-Midwes  | 1 | 1 | 2.31071  | #####    |  |
| 16 | 1 US | 2020-11 | 2 US-Midwes  | 1 | 2 | 2.204875 | #####    |  |
| 17 | 1 US | 2020-11 | 2 US-Midwes  | 1 | 3 | 2.583759 | #####    |  |
| 18 | 1 US | 2020-11 | 2 US-Midwes  | 1 | 4 | 2.471342 | #####    |  |
| 19 | 1 US | 2020-11 | 2 US-Midwes  | 1 | 5 | 1.714621 | #####    |  |
| 20 | 1 US | 2020-11 | 2 US-Midwes  | 2 | 1 | 2.188057 | #####    |  |
| 21 | 1 US | 2020-11 | 2 US-Midwes  | 2 | 2 | 2        | #####    |  |
| 22 | 1 US | 2020-11 | 2 US-Midwes  | 2 | 3 | 2.802469 | #####    |  |
| 23 | 1 US | 2020-11 | 2 US-Midwes  | 2 | 4 | 2.333333 | #####    |  |
| 24 | 1 US | 2020-11 | 2 US-Midwes  | 2 | 5 | 1.265625 | #####    |  |
| 25 | 1 US | 2020-11 | 2 US-Midwes  | 3 | 1 | 2.402791 | #####    |  |
| 26 | 1 US | 2020-11 | 2 US-Midwes  | 3 | 2 | 2.4      | #####    |  |
| 27 | 1 US | 2020-11 | 2 US-Midwes  | 3 | 3 | 2.422222 | #####    |  |
| 28 | 1 US | 2020-11 | 2 US-Midwes  | 3 | 4 | 2.551724 | #####    |  |
| 29 | 1 US | 2020-11 | 2 US-Midwes  | 3 | 5 | 2.086957 | #####    |  |
| 30 | 1 US | 2020-11 | 2 US-Northea | 1 | 1 | 2.417995 | #####    |  |
| 31 | 1 US | 2020-11 | 2 US-Northea | 1 | 2 | 2.570406 | #####    |  |
| 32 | 1 US | 2020-11 | 2 US-Northea | 1 | 3 | 2.795088 | #####    |  |
| 33 | 1 US | 2020-11 | 2 US-Northea | 1 | 4 | 1.829891 | #####    |  |
| 34 | 1 US | 2020-11 | 2 US-Northea | 1 | 5 | 2.349435 | #####    |  |
| 35 | 1 US | 2020-11 | 2 US-Northea | 2 | 1 | 2.391063 | #####    |  |
| 36 | 1 US | 2020-11 | 2 US-Northea | 2 | 2 | 2.604651 | #####    |  |
| 37 | 1 US | 2020-11 | 2 US-Northea | 2 | 3 | 2.742424 | #####    |  |
| 38 | 1 US | 2020-11 | 2 US-Northea | 2 | 4 | 1.85     | #####    |  |
| 39 | 1 US | 2020-11 | 2 US-Northea | 2 | 5 | 2.137255 | #####    |  |
| 40 | 1 US | 2020-11 | 2 US-Northea | 3 | 1 | 2.442173 | #####    |  |
| 41 | 1 US | 2020-11 | 2 US-Northea | 3 | 2 | 2.533333 | #####    |  |
| 42 | 1 US | 2020-11 | 2 US-Northea | 3 | 3 | 2.833333 | #####    |  |
| 43 | 1 US | 2020-11 | 2 US-Northea | 3 | 4 | 1.816667 | #####    |  |
| 44 | 1 US | 2020-11 | 2 US-Northea | 3 | 5 | 2.826087 | 1.039258 |  |
| 45 | 1 US | 2020-11 | 2 US-Overall | 1 | 1 | 2.483264 | #####    |  |
| 46 | 1 US | 2020-11 | 2 US-Overall | 1 | 2 | 2.771891 | #####    |  |
| 47 | 1 US | 2020-11 | 2 US-Overall | 1 | 3 | 2.671448 | #####    |  |
| 48 | 1 US | 2020-11 | 2 US-Overall | 1 | 4 | 2.309901 | #####    |  |
| 49 | 1 US | 2020-11 | 2 US-Overall | 1 | 5 | 1.982848 | #####    |  |
| 50 | 1 US | 2020-11 | 2 US-Overall | 2 | 1 | 2.480951 | #####    |  |
| 51 | 1 US | 2020-11 | 2 US-Overall | 2 | 2 | 2.834189 | #####    |  |
| 52 | 1 US | 2020-11 | 2 US-Overall | 2 | 3 | 3.012345 | #####    |  |
| 53 | 1 US | 2020-11 | 2 US-Overall | 2 | 4 | 2.080867 | #####    |  |
| 54 | 1 US | 2020-11 | 2 US-Overall | 2 | 5 | 1.736482 | #####    |  |
| 55 | 1 US | 2020-11 | 2 US-Overall | 3 | 1 | 2.485254 | #####    |  |
| 56 | 1 US | 2020-11 | 2 US-Overall | 3 | 2 | 2.714326 | #####    |  |
| 57 | 1 US | 2020-11 | 2 US-Overall | 3 | 3 | 2.416751 | #####    |  |
| 58 | 1 US | 2020-11 | 2 US-Overall | 3 | 4 | 2.490333 | #####    |  |
| 59 | 1 US | 2020-11 | 2 US-Overall | 3 |   |          |          |  |
| 60 | 1 US | 2020-11 | 2 US-Overall | 3 |   |          |          |  |

|    |      |         |              |   |   |          |          |  |
|----|------|---------|--------------|---|---|----------|----------|--|
| 1  |      |         |              |   |   |          |          |  |
| 2  |      |         |              |   |   |          |          |  |
| 3  | 1 US | 2020-11 | 2 US-Overall | 3 | 5 | 2.274611 | #####    |  |
| 4  | 1 US | 2020-11 | 2 US-South   | 1 | 1 | 2.663089 | #####    |  |
| 5  | 1 US | 2020-11 | 2 US-South   | 1 | 2 | 3.320463 | #####    |  |
| 6  | 1 US | 2020-11 | 2 US-South   | 1 | 3 | 2.570868 | #####    |  |
| 7  | 1 US | 2020-11 | 2 US-South   | 1 | 4 | 2.488993 | #####    |  |
| 8  | 1 US | 2020-11 | 2 US-South   | 1 | 5 | 2.262914 | #####    |  |
| 9  | 1 US | 2020-11 | 2 US-South   | 2 | 1 | 2.685244 | #####    |  |
| 10 | 1 US | 2020-11 | 2 US-South   | 2 | 2 | 3.3      | #####    |  |
| 11 | 1 US | 2020-11 | 2 US-South   | 2 | 3 | 3.367647 | #####    |  |
| 12 | 1 US | 2020-11 | 2 US-South   | 2 | 4 | 2.114943 | #####    |  |
| 13 | 1 US | 2020-11 | 2 US-South   | 2 | 5 | 1.959596 | #####    |  |
| 14 | 1 US | 2020-11 | 2 US-South   | 3 | 1 | 2.644068 | #####    |  |
| 15 | 1 US | 2020-11 | 2 US-South   | 3 | 2 | 3.333333 | 1.099988 |  |
| 16 | 1 US | 2020-11 | 2 US-South   | 3 | 3 | 1.928571 | #####    |  |
| 17 | 1 US | 2020-11 | 2 US-South   | 3 | 4 | 2.828125 | #####    |  |
| 18 | 1 US | 2020-11 | 2 US-South   | 3 | 5 | 2.647887 | #####    |  |
| 19 | 1 US | 2020-11 | 2 US-West    | 1 | 1 | 2.392348 | #####    |  |
| 20 | 1 US | 2020-11 | 2 US-West    | 1 | 2 | 2.557375 | #####    |  |
| 21 | 1 US | 2020-11 | 2 US-West    | 1 | 3 | 2.786014 | #####    |  |
| 22 | 1 US | 2020-11 | 2 US-West    | 1 | 4 | 2.220148 | #####    |  |
| 23 | 1 US | 2020-11 | 2 US-West    | 1 | 5 | 1.491923 | #####    |  |
| 24 | 1 US | 2020-11 | 2 US-West    | 2 | 1 | 2.451697 | #####    |  |
| 25 | 1 US | 2020-11 | 2 US-West    | 2 | 2 | 3.113208 | #####    |  |
| 26 | 1 US | 2020-11 | 2 US-West    | 2 | 3 | 2.823529 | #####    |  |
| 27 | 1 US | 2020-11 | 2 US-West    | 2 | 4 | 1.99     | #####    |  |
| 28 | 1 US | 2020-11 | 2 US-West    | 2 | 5 | 1.365854 | #####    |  |
| 29 | 1 US | 2020-11 | 2 US-West    | 3 | 1 | 2.336671 | #####    |  |
| 30 | 1 US | 2020-11 | 2 US-West    | 3 | 2 | 1.75     | #####    |  |
| 31 | 1 US | 2020-11 | 2 US-West    | 3 | 3 | 2.76     | #####    |  |
| 32 | 1 US | 2020-11 | 2 US-West    | 3 | 4 | 2.432432 | #####    |  |
| 33 | 1 US | 2020-11 | 2 US-West    | 3 | 5 | 1.625    | #####    |  |
| 34 | 1 US | 2020-11 | 3 US-Midwes  | 1 | 1 | #####    | #####    |  |
| 35 | 1 US | 2020-11 | 3 US-Midwes  | 1 | 2 | 1.41236  | #####    |  |
| 36 | 1 US | 2020-11 | 3 US-Midwes  | 1 | 3 | #####    | #####    |  |
| 37 | 1 US | 2020-11 | 3 US-Midwes  | 1 | 4 | #####    | #####    |  |
| 38 | 1 US | 2020-11 | 3 US-Midwes  | 1 | 5 | #####    | #####    |  |
| 39 | 1 US | 2020-11 | 3 US-Midwes  | 2 | 1 | #####    | #####    |  |
| 40 | 1 US | 2020-11 | 3 US-Midwes  | 2 | 2 | 1.52     | #####    |  |
| 41 | 1 US | 2020-11 | 3 US-Midwes  | 2 | 3 | 0.0875   | #####    |  |
| 42 | 1 US | 2020-11 | 3 US-Midwes  | 2 | 4 | #####    | #####    |  |
| 43 | 1 US | 2020-11 | 3 US-Midwes  | 2 | 5 | 0.15625  | #####    |  |
| 44 | 1 US | 2020-11 | 3 US-Midwes  | 3 | 1 | #####    | #####    |  |
| 45 | 1 US | 2020-11 | 3 US-Midwes  | 3 | 2 | 1.294118 | 1.139962 |  |
| 46 | 1 US | 2020-11 | 3 US-Midwes  | 3 | 3 | #####    | #####    |  |
| 47 | 1 US | 2020-11 | 3 US-Midwes  | 3 | 4 | #####    | #####    |  |
| 48 | 1 US | 2020-11 | 3 US-Midwes  | 3 | 5 | #####    | #####    |  |
| 49 | 1 US | 2020-11 | 3 US-Northe  | 1 | 1 | #####    | #####    |  |
| 50 | 1 US | 2020-11 | 3 US-Northe  | 1 | 2 | #####    | #####    |  |
| 51 | 1 US | 2020-11 | 3 US-Northe  | 1 | 3 | #####    | #####    |  |
| 52 | 1 US | 2020-11 | 3 US-Northe  | 1 | 4 | #####    | #####    |  |
| 53 | 1 US | 2020-11 | 3 US-Northe  | 1 | 5 | #####    | #####    |  |
| 54 | 1 US | 2020-11 | 3 US-Northe  | 2 | 1 | #####    | #####    |  |
| 55 | 1 US | 2020-11 | 3 US-Northe  | 2 | 2 | 0.25     | #####    |  |
| 56 | 1 US | 2020-11 | 3 US-Northe  | 2 | 3 | 0.09375  | #####    |  |
| 57 | 1 US | 2020-11 | 3 US-Northe  | 2 | 4 | #####    | #####    |  |
| 58 | 1 US | 2020-11 | 3 US-Northe  | 2 | 5 | #####    | #####    |  |
| 59 | 1 US | 2020-11 | 3 US-Northe  | 2 | 5 | #####    | #####    |  |
| 60 | 1 US | 2020-11 | 3 US-Northe  | 2 | 5 | #####    | #####    |  |

|    |      |         |              |   |   |          |          |  |
|----|------|---------|--------------|---|---|----------|----------|--|
| 1  |      |         |              |   |   |          |          |  |
| 2  |      |         |              |   |   |          |          |  |
| 3  | 1 US | 2020-11 | 3 US-Northea | 3 | 1 | #####    | #####    |  |
| 4  | 1 US | 2020-11 | 3 US-Northea | 3 | 2 | #####    | #####    |  |
| 5  | 1 US | 2020-11 | 3 US-Northea | 3 | 3 | 0        | 0        |  |
| 6  | 1 US | 2020-11 | 3 US-Northea | 3 | 4 | #####    | #####    |  |
| 7  | 1 US | 2020-11 | 3 US-Northea | 3 | 5 | 0        | 0        |  |
| 8  | 1 US | 2020-11 | 3 US-Overall | 1 | 1 | #####    | #####    |  |
| 9  | 1 US | 2020-11 | 3 US-Overall | 1 | 2 | 1.057087 | #####    |  |
| 10 | 1 US | 2020-11 | 3 US-Overall | 1 | 3 | #####    | #####    |  |
| 11 | 1 US | 2020-11 | 3 US-Overall | 1 | 4 | #####    | #####    |  |
| 12 | 1 US | 2020-11 | 3 US-Overall | 1 | 5 | #####    | #####    |  |
| 13 | 1 US | 2020-11 | 3 US-Overall | 2 | 1 | #####    | #####    |  |
| 14 | 1 US | 2020-11 | 3 US-Overall | 2 | 2 | 1.008826 | #####    |  |
| 15 | 1 US | 2020-11 | 3 US-Overall | 2 | 3 | #####    | #####    |  |
| 16 | 1 US | 2020-11 | 3 US-Overall | 2 | 4 | #####    | #####    |  |
| 17 | 1 US | 2020-11 | 3 US-Overall | 2 | 5 | #####    | #####    |  |
| 18 | 1 US | 2020-11 | 3 US-Overall | 3 | 1 | #####    | #####    |  |
| 19 | 1 US | 2020-11 | 3 US-Overall | 3 | 2 | 1.103969 | #####    |  |
| 20 | 1 US | 2020-11 | 3 US-Overall | 3 | 3 | #####    | #####    |  |
| 21 | 1 US | 2020-11 | 3 US-Overall | 3 | 4 | #####    | #####    |  |
| 22 | 1 US | 2020-11 | 3 US-Overall | 3 | 5 | #####    | #####    |  |
| 23 | 1 US | 2020-11 | 3 US-Overall | 3 | 5 | #####    | #####    |  |
| 24 | 1 US | 2020-11 | 3 US-South   | 1 | 1 | #####    | #####    |  |
| 25 | 1 US | 2020-11 | 3 US-South   | 1 | 2 | #####    | #####    |  |
| 26 | 1 US | 2020-11 | 3 US-South   | 1 | 3 | 0        | 0        |  |
| 27 | 1 US | 2020-11 | 3 US-South   | 1 | 4 | #####    | #####    |  |
| 28 | 1 US | 2020-11 | 3 US-South   | 1 | 5 | #####    | #####    |  |
| 29 | 1 US | 2020-11 | 3 US-South   | 2 | 1 | #####    | #####    |  |
| 30 | 1 US | 2020-11 | 3 US-South   | 2 | 2 | 1.206897 | #####    |  |
| 31 | 1 US | 2020-11 | 3 US-South   | 2 | 3 | 0        | 0        |  |
| 32 | 1 US | 2020-11 | 3 US-South   | 2 | 4 | #####    | #####    |  |
| 33 | 1 US | 2020-11 | 3 US-South   | 2 | 5 | #####    | #####    |  |
| 34 | 1 US | 2020-11 | 3 US-South   | 3 | 1 | #####    | #####    |  |
| 35 | 1 US | 2020-11 | 3 US-South   | 3 | 2 | 0.8125   | #####    |  |
| 36 | 1 US | 2020-11 | 3 US-South   | 3 | 3 | 0        | 0        |  |
| 37 | 1 US | 2020-11 | 3 US-South   | 3 | 4 | #####    | #####    |  |
| 38 | 1 US | 2020-11 | 3 US-South   | 3 | 5 | #####    | #####    |  |
| 39 | 1 US | 2020-11 | 3 US-West    | 1 | 1 | #####    | #####    |  |
| 40 | 1 US | 2020-11 | 3 US-West    | 1 | 2 | 1.29653  | #####    |  |
| 41 | 1 US | 2020-11 | 3 US-West    | 1 | 3 | #####    | #####    |  |
| 42 | 1 US | 2020-11 | 3 US-West    | 1 | 4 | #####    | #####    |  |
| 43 | 1 US | 2020-11 | 3 US-West    | 1 | 5 | #####    | #####    |  |
| 44 | 1 US | 2020-11 | 3 US-West    | 2 | 1 | #####    | #####    |  |
| 45 | 1 US | 2020-11 | 3 US-West    | 2 | 2 | 0.92     | #####    |  |
| 46 | 1 US | 2020-11 | 3 US-West    | 2 | 3 | #####    | #####    |  |
| 47 | 1 US | 2020-11 | 3 US-West    | 2 | 4 | #####    | #####    |  |
| 48 | 1 US | 2020-11 | 3 US-West    | 2 | 5 | 0        | 0        |  |
| 49 | 1 US | 2020-11 | 3 US-West    | 3 | 1 | #####    | #####    |  |
| 50 | 1 US | 2020-11 | 3 US-West    | 3 | 2 | 1.8125   | 1.293723 |  |
| 51 | 1 US | 2020-11 | 3 US-West    | 3 | 3 | #####    | #####    |  |
| 52 | 1 US | 2020-11 | 3 US-West    | 3 | 4 | 0        | 0        |  |
| 53 | 1 US | 2020-11 | 3 US-West    | 3 | 5 | #####    | #####    |  |
| 54 | 1 US | 2020-11 | 4 US-Midwes  | 1 | 1 | 3.158607 | #####    |  |
| 55 | 1 US | 2020-11 | 4 US-Midwes  | 1 | 2 | 3.444406 | #####    |  |
| 56 | 1 US | 2020-11 | 4 US-Midwes  | 1 | 3 | 4.258126 | #####    |  |
| 57 | 1 US | 2020-11 | 4 US-Midwes  | 1 | 4 | 3.439187 | #####    |  |
| 58 | 1 US | 2020-11 | 4 US-Midwes  | 1 | 5 | #####    | #####    |  |
| 59 | 1 US | 2020-11 | 4 US-Midwes  | 1 | 5 | #####    | #####    |  |
| 60 | 1 US | 2020-11 | 4 US-Midwes  | 2 | 1 | 2.348723 | #####    |  |



|    |      |         |              |   |   |          |          |  |
|----|------|---------|--------------|---|---|----------|----------|--|
| 1  |      |         |              |   |   |          |          |  |
| 2  |      |         |              |   |   |          |          |  |
| 3  | 1 US | 2020-11 | 4 US-Midwes  | 2 | 2 | 2.644444 | #####    |  |
| 4  | 1 US | 2020-11 | 4 US-Midwes  | 2 | 3 | 3.088235 | #####    |  |
| 5  | 1 US | 2020-11 | 4 US-Midwes  | 2 | 4 | 2.72     | #####    |  |
| 6  | 1 US | 2020-11 | 4 US-Midwes  | 2 | 5 | #####    | #####    |  |
| 7  | 1 US | 2020-11 | 4 US-Midwes  | 3 | 1 | 3.748753 | #####    |  |
| 8  | 1 US | 2020-11 | 4 US-Midwes  | 3 | 2 | 4.235294 | 1.610002 |  |
| 9  | 1 US | 2020-11 | 4 US-Midwes  | 3 | 3 | 5        | #####    |  |
| 10 | 1 US | 2020-11 | 4 US-Midwes  | 3 | 4 | 3.871795 | #####    |  |
| 11 | 1 US | 2020-11 | 4 US-Midwes  | 3 | 5 | #####    | #####    |  |
| 12 | 1 US | 2020-11 | 4 US-Northea | 1 | 1 | 3.483875 | #####    |  |
| 13 | 1 US | 2020-11 | 4 US-Northea | 1 | 2 | 2.519947 | #####    |  |
| 14 | 1 US | 2020-11 | 4 US-Northea | 1 | 3 | 5.964754 | 1.084179 |  |
| 15 | 1 US | 2020-11 | 4 US-Northea | 1 | 4 | 2.714946 | #####    |  |
| 16 | 1 US | 2020-11 | 4 US-Northea | 1 | 5 | #####    | #####    |  |
| 17 | 1 US | 2020-11 | 4 US-Northea | 2 | 1 | 2.426936 | #####    |  |
| 18 | 1 US | 2020-11 | 4 US-Northea | 2 | 2 | 2.611111 | #####    |  |
| 19 | 1 US | 2020-11 | 4 US-Northea | 2 | 3 | 3.526316 | #####    |  |
| 20 | 1 US | 2020-11 | 4 US-Northea | 2 | 4 | 1.980769 | #####    |  |
| 21 | 1 US | 2020-11 | 4 US-Northea | 2 | 5 | 1.039216 | #####    |  |
| 22 | 1 US | 2020-11 | 4 US-Northea | 3 | 1 | 4.46385  | #####    |  |
| 23 | 1 US | 2020-11 | 4 US-Northea | 3 | 2 | 2.416667 | 1.578821 |  |
| 24 | 1 US | 2020-11 | 4 US-Northea | 3 | 3 | 7.8      | 1.725951 |  |
| 25 | 1 US | 2020-11 | 4 US-Northea | 3 | 4 | 3.188679 | #####    |  |
| 26 | 1 US | 2020-11 | 4 US-Northea | 3 | 5 | #####    | #####    |  |
| 27 | 1 US | 2020-11 | 4 US-Overall | 1 | 1 | 2.874064 | #####    |  |
| 28 | 1 US | 2020-11 | 4 US-Overall | 1 | 2 | 2.734656 | #####    |  |
| 29 | 1 US | 2020-11 | 4 US-Overall | 1 | 3 | 4.619446 | #####    |  |
| 30 | 1 US | 2020-11 | 4 US-Overall | 1 | 4 | 2.472584 | #####    |  |
| 31 | 1 US | 2020-11 | 4 US-Overall | 1 | 5 | #####    | #####    |  |
| 32 | 1 US | 2020-11 | 4 US-Overall | 2 | 1 | 2.001162 | #####    |  |
| 33 | 1 US | 2020-11 | 4 US-Overall | 2 | 2 | 2.638839 | #####    |  |
| 34 | 1 US | 2020-11 | 4 US-Overall | 2 | 3 | 2.74817  | #####    |  |
| 35 | 1 US | 2020-11 | 4 US-Overall | 2 | 4 | 1.725956 | #####    |  |
| 36 | 1 US | 2020-11 | 4 US-Overall | 2 | 5 | #####    | #####    |  |
| 37 | 1 US | 2020-11 | 4 US-Overall | 3 | 1 | 3.645009 | #####    |  |
| 38 | 1 US | 2020-11 | 4 US-Overall | 3 | 2 | 2.819252 | #####    |  |
| 39 | 1 US | 2020-11 | 4 US-Overall | 3 | 3 | 6.124459 | #####    |  |
| 40 | 1 US | 2020-11 | 4 US-Overall | 3 | 4 | 3.073748 | #####    |  |
| 41 | 1 US | 2020-11 | 4 US-Overall | 3 | 5 | #####    | #####    |  |
| 42 | 1 US | 2020-11 | 4 US-South   | 1 | 1 | 2.528924 | #####    |  |
| 43 | 1 US | 2020-11 | 4 US-South   | 1 | 2 | 2.783143 | #####    |  |
| 44 | 1 US | 2020-11 | 4 US-South   | 1 | 3 | 4.551177 | 1.050013 |  |
| 45 | 1 US | 2020-11 | 4 US-South   | 1 | 4 | 1.62563  | #####    |  |
| 46 | 1 US | 2020-11 | 4 US-South   | 1 | 5 | #####    | #####    |  |
| 47 | 1 US | 2020-11 | 4 US-South   | 2 | 1 | 1.496356 | #####    |  |
| 48 | 1 US | 2020-11 | 4 US-South   | 2 | 2 | 2.148148 | #####    |  |
| 49 | 1 US | 2020-11 | 4 US-South   | 2 | 3 | 2.290323 | #####    |  |
| 50 | 1 US | 2020-11 | 4 US-South   | 2 | 4 | 1.084337 | #####    |  |
| 51 | 1 US | 2020-11 | 4 US-South   | 2 | 5 | #####    | #####    |  |
| 52 | 1 US | 2020-11 | 4 US-South   | 3 | 1 | 3.528431 | #####    |  |
| 53 | 1 US | 2020-11 | 4 US-South   | 3 | 2 | 3.1875   | 1.384169 |  |
| 54 | 1 US | 2020-11 | 4 US-South   | 3 | 3 | 7        | 1.935317 |  |
| 55 | 1 US | 2020-11 | 4 US-South   | 3 | 4 | 2.160714 | #####    |  |
| 56 | 1 US | 2020-11 | 4 US-South   | 3 | 5 | 1.130435 | #####    |  |
| 57 | 1 US | 2020-11 | 4 US-West    | 1 | 1 | 2.773326 | #####    |  |
| 58 | 1 US | 2020-11 | 4 US-West    | 1 | 2 | 2.187287 | #####    |  |
| 59 | 1 US | 2020-11 | 4 US-West    | 1 |   |          |          |  |
| 60 | 1 US | 2020-11 | 4 US-West    | 1 |   |          |          |  |

|    |      |         |              |   |   |          |          |  |
|----|------|---------|--------------|---|---|----------|----------|--|
| 1  |      |         |              |   |   |          |          |  |
| 2  |      |         |              |   |   |          |          |  |
| 3  | 1 US | 2020-11 | 4 US-West    | 1 | 3 | 4.172147 | #####    |  |
| 4  | 1 US | 2020-11 | 4 US-West    | 1 | 4 | 2.77502  | #####    |  |
| 5  | 1 US | 2020-11 | 4 US-West    | 1 | 5 | #####    | #####    |  |
| 6  | 1 US | 2020-11 | 4 US-West    | 2 | 1 | 2.262124 | #####    |  |
| 7  | 1 US | 2020-11 | 4 US-West    | 2 | 2 | 3.243902 | 1.119225 |  |
| 8  | 1 US | 2020-11 | 4 US-West    | 2 | 3 | 2.72     | #####    |  |
| 9  | 1 US | 2020-11 | 4 US-West    | 2 | 4 | 1.940476 | #####    |  |
| 10 | 1 US | 2020-11 | 4 US-West    | 2 | 5 | #####    | #####    |  |
| 11 | 1 US | 2020-11 | 4 US-West    | 3 | 1 | 3.220345 | #####    |  |
| 12 | 1 US | 2020-11 | 4 US-West    | 3 | 2 | 1        | #####    |  |
| 13 | 1 US | 2020-11 | 4 US-West    | 3 | 3 | 5.181818 | #####    |  |
| 14 | 1 US | 2020-11 | 4 US-West    | 3 | 4 | 3.5      | #####    |  |
| 15 | 1 US | 2020-11 | 4 US-West    | 3 | 5 | 0.375    | #####    |  |
| 16 | 1 US | 2020-11 | 5 US-Midwes  | 1 | 1 | 4.092504 | #####    |  |
| 17 | 1 US | 2020-11 | 5 US-Midwes  | 1 | 2 | 3.610113 | #####    |  |
| 18 | 1 US | 2020-11 | 5 US-Midwes  | 1 | 3 | 4.083598 | #####    |  |
| 19 | 1 US | 2020-11 | 5 US-Midwes  | 1 | 4 | 4.195085 | #####    |  |
| 20 | 1 US | 2020-11 | 5 US-Midwes  | 1 | 5 | 4.60541  | #####    |  |
| 21 | 1 US | 2020-11 | 5 US-Midwes  | 2 | 1 | 4.071881 | #####    |  |
| 22 | 1 US | 2020-11 | 5 US-Midwes  | 2 | 2 | 4.3125   | #####    |  |
| 23 | 1 US | 2020-11 | 5 US-Midwes  | 2 | 3 | 4.959459 | #####    |  |
| 24 | 1 US | 2020-11 | 5 US-Midwes  | 2 | 4 | 3.632911 | #####    |  |
| 25 | 1 US | 2020-11 | 5 US-Midwes  | 2 | 5 | 2.96875  | #####    |  |
| 26 | 1 US | 2020-11 | 5 US-Midwes  | 3 | 1 | 4.108291 | #####    |  |
| 27 | 1 US | 2020-11 | 5 US-Midwes  | 3 | 2 | 2.947368 | #####    |  |
| 28 | 1 US | 2020-11 | 5 US-Midwes  | 3 | 3 | 3.465116 | #####    |  |
| 29 | 1 US | 2020-11 | 5 US-Midwes  | 3 | 4 | 4.551282 | #####    |  |
| 30 | 1 US | 2020-11 | 5 US-Midwes  | 3 | 5 | 6.046154 | #####    |  |
| 31 | 1 US | 2020-11 | 5 US-Northea | 1 | 1 | 4.602984 | #####    |  |
| 32 | 1 US | 2020-11 | 5 US-Northea | 1 | 2 | 4.811555 | #####    |  |
| 33 | 1 US | 2020-11 | 5 US-Northea | 1 | 3 | 5.236804 | #####    |  |
| 34 | 1 US | 2020-11 | 5 US-Northea | 1 | 4 | 3.949902 | #####    |  |
| 35 | 1 US | 2020-11 | 5 US-Northea | 1 | 5 | 3.911113 | #####    |  |
| 36 | 1 US | 2020-11 | 5 US-Northea | 2 | 1 | 3.564807 | #####    |  |
| 37 | 1 US | 2020-11 | 5 US-Northea | 2 | 2 | 3.410256 | #####    |  |
| 38 | 1 US | 2020-11 | 5 US-Northea | 2 | 3 | 3.79661  | #####    |  |
| 39 | 1 US | 2020-11 | 5 US-Northea | 2 | 4 | 3.576923 | #####    |  |
| 40 | 1 US | 2020-11 | 5 US-Northea | 2 | 5 | 3.416667 | #####    |  |
| 41 | 1 US | 2020-11 | 5 US-Northea | 3 | 1 | 5.528899 | #####    |  |
| 42 | 1 US | 2020-11 | 5 US-Northea | 3 | 2 | 6.285714 | 1.855647 |  |
| 43 | 1 US | 2020-11 | 5 US-Northea | 3 | 3 | 6.322581 | 1.196111 |  |
| 44 | 1 US | 2020-11 | 5 US-Northea | 3 | 4 | 4.181818 | #####    |  |
| 45 | 1 US | 2020-11 | 5 US-Northea | 3 | 5 | 4.956522 | 1.20099  |  |
| 46 | 1 US | 2020-11 | 5 US-Overall | 1 | 1 | 4.102543 | #####    |  |
| 47 | 1 US | 2020-11 | 5 US-Overall | 1 | 2 | 3.556515 | #####    |  |
| 48 | 1 US | 2020-11 | 5 US-Overall | 1 | 3 | 4.174326 | #####    |  |
| 49 | 1 US | 2020-11 | 5 US-Overall | 1 | 4 | 4.477191 | #####    |  |
| 50 | 1 US | 2020-11 | 5 US-Overall | 1 | 5 | 4.147392 | #####    |  |
| 51 | 1 US | 2020-11 | 5 US-Overall | 2 | 1 | 3.859787 | #####    |  |
| 52 | 1 US | 2020-11 | 5 US-Overall | 2 | 2 | 3.768598 | #####    |  |
| 53 | 1 US | 2020-11 | 5 US-Overall | 2 | 3 | 4.20128  | #####    |  |
| 54 | 1 US | 2020-11 | 5 US-Overall | 2 | 4 | 4.161674 | #####    |  |
| 55 | 1 US | 2020-11 | 5 US-Overall | 2 | 5 | 3.066059 | #####    |  |
| 56 | 1 US | 2020-11 | 5 US-Overall | 3 | 1 | 4.314023 | #####    |  |
| 57 | 1 US | 2020-11 | 5 US-Overall | 3 | 2 | 3.36693  | #####    |  |
| 58 | 1 US | 2020-11 | 5 US-Overall | 3 | 3 | 4.154572 | #####    |  |
| 59 | 1 US | 2020-11 | 5 US-Overall | 3 |   |          |          |  |
| 60 | 1 US | 2020-11 | 5 US-Overall | 3 |   |          |          |  |

|    |      |         |              |   |   |          |          |  |
|----|------|---------|--------------|---|---|----------|----------|--|
| 1  |      |         |              |   |   |          |          |  |
| 2  |      |         |              |   |   |          |          |  |
| 3  | 1 US | 2020-11 | 5 US-Overall | 3 | 4 | 4.743716 | #####    |  |
| 4  | 1 US | 2020-11 | 5 US-Overall | 3 | 5 | 5.47494  | #####    |  |
| 5  | 1 US | 2020-11 | 5 US-South   | 1 | 1 | 4.07585  | #####    |  |
| 6  | 1 US | 2020-11 | 5 US-South   | 1 | 2 | 3.489936 | 1.008512 |  |
| 7  | 1 US | 2020-11 | 5 US-South   | 1 | 3 | 3.848189 | #####    |  |
| 8  | 1 US | 2020-11 | 5 US-South   | 1 | 4 | 4.833745 | #####    |  |
| 9  | 1 US | 2020-11 | 5 US-South   | 1 | 5 | 4.149876 | #####    |  |
| 10 | 1 US | 2020-11 | 5 US-South   | 2 | 1 | 3.777355 | #####    |  |
| 11 | 1 US | 2020-11 | 5 US-South   | 2 | 2 | 4.111111 | 1.186775 |  |
| 12 | 1 US | 2020-11 | 5 US-South   | 2 | 3 | 3.65     | #####    |  |
| 13 | 1 US | 2020-11 | 5 US-South   | 2 | 4 | 4.385542 | #####    |  |
| 14 | 1 US | 2020-11 | 5 US-South   | 2 | 5 | 2.934066 | #####    |  |
| 15 | 1 US | 2020-11 | 5 US-South   | 3 | 1 | 4.336569 | #####    |  |
| 16 | 1 US | 2020-11 | 5 US-South   | 3 | 2 | 3.117647 | 1.443051 |  |
| 17 | 1 US | 2020-11 | 5 US-South   | 3 | 3 | 4        | #####    |  |
| 18 | 1 US | 2020-11 | 5 US-South   | 3 | 4 | 5.301887 | #####    |  |
| 19 | 1 US | 2020-11 | 5 US-South   | 3 | 5 | 5.774194 | #####    |  |
| 20 | 1 US | 2020-11 | 5 US-West    | 1 | 1 | 3.832312 | #####    |  |
| 21 | 1 US | 2020-11 | 5 US-West    | 1 | 2 | 2.646642 | #####    |  |
| 22 | 1 US | 2020-11 | 5 US-West    | 1 | 3 | 4.042026 | #####    |  |
| 23 | 1 US | 2020-11 | 5 US-West    | 1 | 4 | 4.546156 | #####    |  |
| 24 | 1 US | 2020-11 | 5 US-West    | 1 | 5 | 3.82113  | #####    |  |
| 25 | 1 US | 2020-11 | 5 US-West    | 2 | 1 | 4.002819 | #####    |  |
| 26 | 1 US | 2020-11 | 5 US-West    | 2 | 2 | 3.25     | #####    |  |
| 27 | 1 US | 2020-11 | 5 US-West    | 2 | 3 | 4.675325 | #####    |  |
| 28 | 1 US | 2020-11 | 5 US-West    | 2 | 4 | 4.483871 | #####    |  |
| 29 | 1 US | 2020-11 | 5 US-West    | 2 | 5 | 3.181818 | #####    |  |
| 30 | 1 US | 2020-11 | 5 US-West    | 3 | 1 | 3.670113 | #####    |  |
| 31 | 1 US | 2020-11 | 5 US-West    | 3 | 2 | 1.8      | #####    |  |
| 32 | 1 US | 2020-11 | 5 US-West    | 3 | 3 | 3.6      | #####    |  |
| 33 | 1 US | 2020-11 | 5 US-West    | 3 | 4 | 4.606061 | #####    |  |
| 34 | 1 US | 2020-11 | 5 US-West    | 3 | 5 | 4.523077 | #####    |  |
| 35 | 1 US | 2020-12 | 1 US-Midwes  | 1 | 1 | 6.530056 | #####    |  |
| 36 | 1 US | 2020-12 | 1 US-Midwes  | 1 | 2 | 7.824026 | 1.095314 |  |
| 37 | 1 US | 2020-12 | 1 US-Midwes  | 1 | 3 | 7.296303 | #####    |  |
| 38 | 1 US | 2020-12 | 1 US-Midwes  | 1 | 4 | 5.211781 | #####    |  |
| 39 | 1 US | 2020-12 | 1 US-Midwes  | 1 | 5 | 3.845883 | #####    |  |
| 40 | 1 US | 2020-12 | 1 US-Midwes  | 2 | 1 | 5.529339 | #####    |  |
| 41 | 1 US | 2020-12 | 1 US-Midwes  | 2 | 2 | 5.25     | #####    |  |
| 42 | 1 US | 2020-12 | 1 US-Midwes  | 2 | 3 | 7.091837 | #####    |  |
| 43 | 1 US | 2020-12 | 1 US-Midwes  | 2 | 4 | 5.120482 | #####    |  |
| 44 | 1 US | 2020-12 | 1 US-Midwes  | 2 | 5 | 3.035088 | #####    |  |
| 45 | 1 US | 2020-12 | 1 US-Midwes  | 3 | 1 | 7.462592 | #####    |  |
| 46 | 1 US | 2020-12 | 1 US-Midwes  | 3 | 2 | 9.064516 | 1.550421 |  |
| 47 | 1 US | 2020-12 | 1 US-Midwes  | 3 | 3 | 7.545455 | 1.292888 |  |
| 48 | 1 US | 2020-12 | 1 US-Midwes  | 3 | 4 | 5.333333 | #####    |  |
| 49 | 1 US | 2020-12 | 1 US-Midwes  | 3 | 5 | 4.853659 | #####    |  |
| 50 | 1 US | 2020-12 | 1 US-Northe  | 1 | 1 | 5.358116 | #####    |  |
| 51 | 1 US | 2020-12 | 1 US-Northe  | 1 | 2 | 6.24769  | 1.034933 |  |
| 52 | 1 US | 2020-12 | 1 US-Northe  | 1 | 3 | 5.647355 | #####    |  |
| 53 | 1 US | 2020-12 | 1 US-Northe  | 1 | 4 | 5.064574 | #####    |  |
| 54 | 1 US | 2020-12 | 1 US-Northe  | 1 | 5 | 3.58139  | #####    |  |
| 55 | 1 US | 2020-12 | 1 US-Northe  | 2 | 1 | 5.419918 | #####    |  |
| 56 | 1 US | 2020-12 | 1 US-Northe  | 2 | 2 | 5.767442 | #####    |  |
| 57 | 1 US | 2020-12 | 1 US-Northe  | 2 | 3 | 6.042553 | #####    |  |
| 58 | 1 US | 2020-12 | 1 US-Northe  | 2 | 4 | 5.10989  | #####    |  |
| 59 | 1 US | 2020-12 | 1 US-Northe  | 2 |   |          |          |  |
| 60 | 1 US | 2020-12 | 1 US-Northe  | 2 |   |          |          |  |

|    |      |         |              |   |   |          |          |  |
|----|------|---------|--------------|---|---|----------|----------|--|
| 1  |      |         |              |   |   |          |          |  |
| 2  |      |         |              |   |   |          |          |  |
| 3  | 1 US | 2020-12 | 1 US-Northea | 2 | 5 | 3.9      | #####    |  |
| 4  | 1 US | 2020-12 | 1 US-Northea | 3 | 1 | 5.293311 | #####    |  |
| 5  | 1 US | 2020-12 | 1 US-Northea | 3 | 2 | 6.619048 | 1.705703 |  |
| 6  | 1 US | 2020-12 | 1 US-Northea | 3 | 3 | 5.1875   | #####    |  |
| 7  | 1 US | 2020-12 | 1 US-Northea | 3 | 4 | 5        | #####    |  |
| 8  | 1 US | 2020-12 | 1 US-Northea | 3 | 5 | 3.298246 | #####    |  |
| 9  | 1 US | 2020-12 | 1 US-Overall | 1 | 1 | 6.331048 | #####    |  |
| 10 | 1 US | 2020-12 | 1 US-Overall | 1 | 2 | 7.098411 | #####    |  |
| 11 | 1 US | 2020-12 | 1 US-Overall | 1 | 3 | 6.821837 | #####    |  |
| 12 | 1 US | 2020-12 | 1 US-Overall | 1 | 4 | 5.818018 | #####    |  |
| 13 | 1 US | 2020-12 | 1 US-Overall | 1 | 5 | 4.129533 | #####    |  |
| 14 | 1 US | 2020-12 | 1 US-Overall | 2 | 1 | 5.951175 | #####    |  |
| 15 | 1 US | 2020-12 | 1 US-Overall | 2 | 2 | 6.755673 | #####    |  |
| 16 | 1 US | 2020-12 | 1 US-Overall | 2 | 3 | 6.511595 | #####    |  |
| 17 | 1 US | 2020-12 | 1 US-Overall | 2 | 4 | 5.75901  | #####    |  |
| 18 | 1 US | 2020-12 | 1 US-Overall | 2 | 5 | 3.634286 | #####    |  |
| 19 | 1 US | 2020-12 | 1 US-Overall | 3 | 1 | 6.675023 | #####    |  |
| 20 | 1 US | 2020-12 | 1 US-Overall | 3 | 2 | 7.35726  | #####    |  |
| 21 | 1 US | 2020-12 | 1 US-Overall | 3 | 3 | 7.066281 | #####    |  |
| 22 | 1 US | 2020-12 | 1 US-Overall | 3 | 4 | 5.88904  | #####    |  |
| 23 | 1 US | 2020-12 | 1 US-Overall | 3 | 5 | 4.735847 | #####    |  |
| 24 | 1 US | 2020-12 | 1 US-South   | 1 | 1 | 6.172069 | #####    |  |
| 25 | 1 US | 2020-12 | 1 US-South   | 1 | 2 | 6.521065 | 1.035669 |  |
| 26 | 1 US | 2020-12 | 1 US-South   | 1 | 3 | 6.451738 | #####    |  |
| 27 | 1 US | 2020-12 | 1 US-South   | 1 | 4 | 6.118417 | #####    |  |
| 28 | 1 US | 2020-12 | 1 US-South   | 1 | 5 | 4.460628 | #####    |  |
| 29 | 1 US | 2020-12 | 1 US-South   | 2 | 1 | 6.204067 | #####    |  |
| 30 | 1 US | 2020-12 | 1 US-South   | 2 | 2 | 6.862069 | #####    |  |
| 31 | 1 US | 2020-12 | 1 US-South   | 2 | 3 | 6.272727 | #####    |  |
| 32 | 1 US | 2020-12 | 1 US-South   | 2 | 4 | 6.586957 | #####    |  |
| 33 | 1 US | 2020-12 | 1 US-South   | 2 | 5 | 3.914286 | #####    |  |
| 34 | 1 US | 2020-12 | 1 US-South   | 3 | 1 | 6.144107 | #####    |  |
| 35 | 1 US | 2020-12 | 1 US-South   | 3 | 2 | 6.181818 | 1.824649 |  |
| 36 | 1 US | 2020-12 | 1 US-South   | 3 | 3 | 6.55814  | 1.00694  |  |
| 37 | 1 US | 2020-12 | 1 US-South   | 3 | 4 | 5.614035 | #####    |  |
| 38 | 1 US | 2020-12 | 1 US-South   | 3 | 5 | 5.217391 | #####    |  |
| 39 | 1 US | 2020-12 | 1 US-West    | 1 | 1 | 7.333228 | #####    |  |
| 40 | 1 US | 2020-12 | 1 US-West    | 1 | 2 | 8.315035 | #####    |  |
| 41 | 1 US | 2020-12 | 1 US-West    | 1 | 3 | 8.178912 | #####    |  |
| 42 | 1 US | 2020-12 | 1 US-West    | 1 | 4 | 6.447908 | #####    |  |
| 43 | 1 US | 2020-12 | 1 US-West    | 1 | 5 | 4.333455 | #####    |  |
| 44 | 1 US | 2020-12 | 1 US-West    | 2 | 1 | 6.308418 | #####    |  |
| 45 | 1 US | 2020-12 | 1 US-West    | 2 | 2 | 8.538462 | 1.245605 |  |
| 46 | 1 US | 2020-12 | 1 US-West    | 2 | 3 | 6.864865 | #####    |  |
| 47 | 1 US | 2020-12 | 1 US-West    | 2 | 4 | 5.32     | #####    |  |
| 48 | 1 US | 2020-12 | 1 US-West    | 2 | 5 | 3.444444 | #####    |  |
| 49 | 1 US | 2020-12 | 1 US-West    | 3 | 1 | 8.191134 | #####    |  |
| 50 | 1 US | 2020-12 | 1 US-West    | 3 | 2 | 8.178571 | 1.305509 |  |
| 51 | 1 US | 2020-12 | 1 US-West    | 3 | 3 | 9.146341 | 1.164441 |  |
| 52 | 1 US | 2020-12 | 1 US-West    | 3 | 4 | 7.790698 | 1.244859 |  |
| 53 | 1 US | 2020-12 | 1 US-West    | 3 | 5 | 5.52     | #####    |  |
| 54 | 1 US | 2020-12 | 2 US-Midwes  | 1 | 1 | 2.124611 | #####    |  |
| 55 | 1 US | 2020-12 | 2 US-Midwes  | 1 | 2 | 2.045484 | #####    |  |
| 56 | 1 US | 2020-12 | 2 US-Midwes  | 1 | 3 | 2.574457 | #####    |  |
| 57 | 1 US | 2020-12 | 2 US-Midwes  | 1 | 4 | 2.020985 | #####    |  |
| 58 | 1 US | 2020-12 | 2 US-Midwes  | 1 | 5 | 1.357815 | #####    |  |
| 59 | 1 US | 2020-12 | 2 US-Midwes  | 1 |   |          |          |  |
| 60 | 1 US | 2020-12 | 2 US-Midwes  | 1 |   |          |          |  |

|    |      |         |              |   |   |          |          |  |
|----|------|---------|--------------|---|---|----------|----------|--|
| 1  |      |         |              |   |   |          |          |  |
| 2  |      |         |              |   |   |          |          |  |
| 3  | 1 US | 2020-12 | 2 US-Midwes  | 2 | 1 | 2.182164 | #####    |  |
| 4  | 1 US | 2020-12 | 2 US-Midwes  | 2 | 2 | 2.408163 | #####    |  |
| 5  | 1 US | 2020-12 | 2 US-Midwes  | 2 | 3 | 2.59633  | #####    |  |
| 6  | 1 US | 2020-12 | 2 US-Midwes  | 2 | 4 | 1.967742 | #####    |  |
| 7  | 1 US | 2020-12 | 2 US-Midwes  | 2 | 5 | 1.172414 | #####    |  |
| 8  | 1 US | 2020-12 | 2 US-Midwes  | 3 | 1 | 2.072285 | #####    |  |
| 9  | 1 US | 2020-12 | 2 US-Midwes  | 3 | 2 | 1.861111 | #####    |  |
| 10 | 1 US | 2020-12 | 2 US-Midwes  | 3 | 3 | 2.55     | #####    |  |
| 11 | 1 US | 2020-12 | 2 US-Midwes  | 3 | 4 | 2.093023 | #####    |  |
| 12 | 1 US | 2020-12 | 2 US-Midwes  | 3 | 5 | 1.581395 | #####    |  |
| 13 | 1 US | 2020-12 | 2 US-Northea | 1 | 1 | 2.208268 | #####    |  |
| 14 | 1 US | 2020-12 | 2 US-Northea | 1 | 2 | 2.491686 | #####    |  |
| 15 | 1 US | 2020-12 | 2 US-Northea | 1 | 3 | 2.581756 | #####    |  |
| 16 | 1 US | 2020-12 | 2 US-Northea | 1 | 4 | 1.801636 | #####    |  |
| 17 | 1 US | 2020-12 | 2 US-Northea | 1 | 5 | 1.435162 | #####    |  |
| 18 | 1 US | 2020-12 | 2 US-Northea | 2 | 1 | 2.128368 | #####    |  |
| 19 | 1 US | 2020-12 | 2 US-Northea | 2 | 2 | 2.64     | #####    |  |
| 20 | 1 US | 2020-12 | 2 US-Northea | 2 | 3 | 2.382353 | #####    |  |
| 21 | 1 US | 2020-12 | 2 US-Northea | 2 | 4 | 1.666667 | #####    |  |
| 22 | 1 US | 2020-12 | 2 US-Northea | 2 | 5 | 1.431373 | #####    |  |
| 23 | 1 US | 2020-12 | 2 US-Northea | 3 | 1 | 2.289938 | #####    |  |
| 24 | 1 US | 2020-12 | 2 US-Northea | 3 | 2 | 2.375    | #####    |  |
| 25 | 1 US | 2020-12 | 2 US-Northea | 3 | 3 | 2.805556 | #####    |  |
| 26 | 1 US | 2020-12 | 2 US-Northea | 3 | 4 | 1.979167 | #####    |  |
| 27 | 1 US | 2020-12 | 2 US-Northea | 3 | 5 | 1.438596 | #####    |  |
| 28 | 1 US | 2020-12 | 2 US-Overall | 1 | 1 | 2.235886 | #####    |  |
| 29 | 1 US | 2020-12 | 2 US-Overall | 1 | 2 | 2.389235 | #####    |  |
| 30 | 1 US | 2020-12 | 2 US-Overall | 1 | 3 | 2.38754  | #####    |  |
| 31 | 1 US | 2020-12 | 2 US-Overall | 1 | 4 | 2.049037 | #####    |  |
| 32 | 1 US | 2020-12 | 2 US-Overall | 1 | 5 | 1.74375  | #####    |  |
| 33 | 1 US | 2020-12 | 2 US-Overall | 2 | 1 | 2.218566 | #####    |  |
| 34 | 1 US | 2020-12 | 2 US-Overall | 2 | 2 | 2.473054 | #####    |  |
| 35 | 1 US | 2020-12 | 2 US-Overall | 2 | 3 | 2.549394 | #####    |  |
| 36 | 1 US | 2020-12 | 2 US-Overall | 2 | 4 | 1.867516 | #####    |  |
| 37 | 1 US | 2020-12 | 2 US-Overall | 2 | 5 | 1.567415 | #####    |  |
| 38 | 1 US | 2020-12 | 2 US-Overall | 3 | 1 | 2.251063 | #####    |  |
| 39 | 1 US | 2020-12 | 2 US-Overall | 3 | 2 | 2.327886 | #####    |  |
| 40 | 1 US | 2020-12 | 2 US-Overall | 3 | 3 | 2.261564 | #####    |  |
| 41 | 1 US | 2020-12 | 2 US-Overall | 3 | 4 | 2.260034 | #####    |  |
| 42 | 1 US | 2020-12 | 2 US-Overall | 3 | 5 | 1.949976 | #####    |  |
| 43 | 1 US | 2020-12 | 2 US-South   | 1 | 1 | 2.274543 | #####    |  |
| 44 | 1 US | 2020-12 | 2 US-South   | 1 | 2 | 2.437547 | #####    |  |
| 45 | 1 US | 2020-12 | 2 US-South   | 1 | 3 | 2.269619 | 0.166776 |  |
| 46 | 1 US | 2020-12 | 2 US-South   | 1 | 4 | 2.137958 | #####    |  |
| 47 | 1 US | 2020-12 | 2 US-South   | 1 | 5 | 2.098129 | #####    |  |
| 48 | 1 US | 2020-12 | 2 US-South   | 2 | 1 | 2.287918 | #####    |  |
| 49 | 1 US | 2020-12 | 2 US-South   | 2 | 2 | 2.453125 | #####    |  |
| 50 | 1 US | 2020-12 | 2 US-South   | 2 | 3 | 2.678571 | #####    |  |
| 51 | 1 US | 2020-12 | 2 US-South   | 2 | 4 | 1.854167 | #####    |  |
| 52 | 1 US | 2020-12 | 2 US-South   | 2 | 5 | 1.788732 | #####    |  |
| 53 | 1 US | 2020-12 | 2 US-South   | 3 | 1 | 2.263305 | #####    |  |
| 54 | 1 US | 2020-12 | 2 US-South   | 3 | 2 | 2.423077 | #####    |  |
| 55 | 1 US | 2020-12 | 2 US-South   | 3 | 3 | 2.021739 | #####    |  |
| 56 | 1 US | 2020-12 | 2 US-South   | 3 | 4 | 2.421875 | #####    |  |
| 57 | 1 US | 2020-12 | 2 US-South   | 3 | 5 | 2.490196 | #####    |  |
| 58 | 1 US | 2020-12 | 2 US-South   | 3 | 1 | 2.276042 | #####    |  |
| 59 | 1 US | 2020-12 | 2 US-South   | 3 | 2 |          |          |  |
| 60 | 1 US | 2020-12 | 2 US-West    | 1 | 1 | 2.276042 | #####    |  |

1  
2  
3  
4  
5  
6  
7  
8  
9  
10  
11  
12  
13  
14  
15  
16  
17  
18  
19  
20  
21  
22  
23  
24  
25  
26  
27  
28  
29  
30  
31  
32  
33  
34  
35  
36  
37  
38  
39  
40  
41  
42  
43  
44  
45  
46  
47  
48  
49  
50  
51  
52  
53  
54  
55  
56  
57  
58  
59  
60

|      |         |              |   |   |          |       |
|------|---------|--------------|---|---|----------|-------|
| 1 US | 2020-12 | 2 US-West    | 1 | 2 | 2.517357 | ##### |
| 1 US | 2020-12 | 2 US-West    | 1 | 3 | 2.324377 | ##### |
| 1 US | 2020-12 | 2 US-West    | 1 | 4 | 2.13241  | ##### |
| 1 US | 2020-12 | 2 US-West    | 1 | 5 | 1.749234 | ##### |
| 1 US | 2020-12 | 2 US-West    | 2 | 1 | 2.19594  | ##### |
| 1 US | 2020-12 | 2 US-West    | 2 | 2 | 2.425532 | ##### |
| 1 US | 2020-12 | 2 US-West    | 2 | 3 | 2.428571 | ##### |
| 1 US | 2020-12 | 2 US-West    | 2 | 4 | 2.011905 | ##### |
| 1 US | 2020-12 | 2 US-West    | 2 | 5 | 1.625    | ##### |
| 1 US | 2020-12 | 2 US-West    | 3 | 1 | 2.340889 | ##### |
| 1 US | 2020-12 | 2 US-West    | 3 | 2 | 2.571429 | ##### |
| 1 US | 2020-12 | 2 US-West    | 3 | 3 | 2.25     | ##### |
| 1 US | 2020-12 | 2 US-West    | 3 | 4 | 2.282609 | ##### |
| 1 US | 2020-12 | 2 US-West    | 3 | 5 | 1.90566  | ##### |
| 1 US | 2020-12 | 3 US-Midwes  | 1 | 1 | #####    | ##### |
| 1 US | 2020-12 | 3 US-Midwes  | 1 | 2 | #####    | ##### |
| 1 US | 2020-12 | 3 US-Midwes  | 1 | 3 | #####    | ##### |
| 1 US | 2020-12 | 3 US-Midwes  | 1 | 4 | 0        | 0     |
| 1 US | 2020-12 | 3 US-Midwes  | 1 | 5 | #####    | ##### |
| 1 US | 2020-12 | 3 US-Midwes  | 2 | 1 | #####    | ##### |
| 1 US | 2020-12 | 3 US-Midwes  | 2 | 2 | #####    | ##### |
| 1 US | 2020-12 | 3 US-Midwes  | 2 | 3 | 0        | 0     |
| 1 US | 2020-12 | 3 US-Midwes  | 2 | 4 | 0        | 0     |
| 1 US | 2020-12 | 3 US-Midwes  | 2 | 5 | 0        | 0     |
| 1 US | 2020-12 | 3 US-Midwes  | 3 | 1 | #####    | ##### |
| 1 US | 2020-12 | 3 US-Midwes  | 3 | 2 | 0        | 0     |
| 1 US | 2020-12 | 3 US-Midwes  | 3 | 3 | 0.45     | ##### |
| 1 US | 2020-12 | 3 US-Midwes  | 3 | 4 | 0        | 0     |
| 1 US | 2020-12 | 3 US-Midwes  | 3 | 5 | #####    | ##### |
| 1 US | 2020-12 | 3 US-Northea | 1 | 1 | #####    | ##### |
| 1 US | 2020-12 | 3 US-Northea | 1 | 2 | #####    | ##### |
| 1 US | 2020-12 | 3 US-Northea | 1 | 3 | #####    | ##### |
| 1 US | 2020-12 | 3 US-Northea | 1 | 4 | #####    | ##### |
| 1 US | 2020-12 | 3 US-Northea | 1 | 5 | #####    | ##### |
| 1 US | 2020-12 | 3 US-Northea | 2 | 1 | #####    | ##### |
| 1 US | 2020-12 | 3 US-Northea | 2 | 2 | 0.1      | ##### |
| 1 US | 2020-12 | 3 US-Northea | 2 | 3 | #####    | ##### |
| 1 US | 2020-12 | 3 US-Northea | 2 | 4 | #####    | ##### |
| 1 US | 2020-12 | 3 US-Northea | 2 | 5 | #####    | ##### |
| 1 US | 2020-12 | 3 US-Northea | 3 | 1 | #####    | ##### |
| 1 US | 2020-12 | 3 US-Northea | 3 | 2 | 0        | 0     |
| 1 US | 2020-12 | 3 US-Northea | 3 | 3 | 0        | 0     |
| 1 US | 2020-12 | 3 US-Northea | 3 | 4 | #####    | ##### |
| 1 US | 2020-12 | 3 US-Northea | 3 | 5 | 0        | 0     |
| 1 US | 2020-12 | 3 US-Overall | 1 | 1 | #####    | ##### |
| 1 US | 2020-12 | 3 US-Overall | 1 | 2 | #####    | ##### |
| 1 US | 2020-12 | 3 US-Overall | 1 | 3 | #####    | ##### |
| 1 US | 2020-12 | 3 US-Overall | 1 | 4 | #####    | ##### |
| 1 US | 2020-12 | 3 US-Overall | 1 | 5 | #####    | ##### |
| 1 US | 2020-12 | 3 US-Overall | 2 | 1 | #####    | ##### |
| 1 US | 2020-12 | 3 US-Overall | 2 | 2 | #####    | ##### |
| 1 US | 2020-12 | 3 US-Overall | 2 | 3 | #####    | ##### |
| 1 US | 2020-12 | 3 US-Overall | 2 | 4 | #####    | ##### |
| 1 US | 2020-12 | 3 US-Overall | 2 | 5 | #####    | ##### |
| 1 US | 2020-12 | 3 US-Overall | 3 | 1 | #####    | ##### |
| 1 US | 2020-12 | 3 US-Overall | 3 | 2 | #####    | ##### |

|    |      |         |              |   |   |          |          |  |
|----|------|---------|--------------|---|---|----------|----------|--|
| 1  |      |         |              |   |   |          |          |  |
| 2  |      |         |              |   |   |          |          |  |
| 3  | 1 US | 2020-12 | 3 US-Overall | 3 | 3 | #####    | #####    |  |
| 4  | 1 US | 2020-12 | 3 US-Overall | 3 | 4 | #####    | #####    |  |
| 5  | 1 US | 2020-12 | 3 US-Overall | 3 | 5 | #####    | #####    |  |
| 6  | 1 US | 2020-12 | 3 US-South   | 1 | 1 | #####    | #####    |  |
| 7  | 1 US | 2020-12 | 3 US-South   | 1 | 2 | #####    | #####    |  |
| 8  | 1 US | 2020-12 | 3 US-South   | 1 | 3 | #####    | #####    |  |
| 9  | 1 US | 2020-12 | 3 US-South   | 1 | 4 | 0        | 0        |  |
| 10 | 1 US | 2020-12 | 3 US-South   | 1 | 5 | #####    | #####    |  |
| 11 | 1 US | 2020-12 | 3 US-South   | 2 | 1 | #####    | #####    |  |
| 12 | 1 US | 2020-12 | 3 US-South   | 2 | 2 | 0.203125 | #####    |  |
| 13 | 1 US | 2020-12 | 3 US-South   | 2 | 3 | #####    | #####    |  |
| 14 | 1 US | 2020-12 | 3 US-South   | 2 | 4 | 0        | 0        |  |
| 15 | 1 US | 2020-12 | 3 US-South   | 2 | 5 | #####    | #####    |  |
| 16 | 1 US | 2020-12 | 3 US-South   | 3 | 1 | #####    | #####    |  |
| 17 | 1 US | 2020-12 | 3 US-South   | 3 | 2 | #####    | #####    |  |
| 18 | 1 US | 2020-12 | 3 US-South   | 3 | 3 | 0        | 0        |  |
| 19 | 1 US | 2020-12 | 3 US-South   | 3 | 4 | 0        | 0        |  |
| 20 | 1 US | 2020-12 | 3 US-South   | 3 | 5 | 0        | 0        |  |
| 21 | 1 US | 2020-12 | 3 US-South   | 3 | 5 | 0        | 0        |  |
| 22 | 1 US | 2020-12 | 3 US-West    | 1 | 1 | #####    | 0.074878 |  |
| 23 | 1 US | 2020-12 | 3 US-West    | 1 | 2 | #####    | #####    |  |
| 24 | 1 US | 2020-12 | 3 US-West    | 1 | 3 | #####    | #####    |  |
| 25 | 1 US | 2020-12 | 3 US-West    | 1 | 4 | #####    | #####    |  |
| 26 | 1 US | 2020-12 | 3 US-West    | 1 | 5 | #####    | #####    |  |
| 27 | 1 US | 2020-12 | 3 US-West    | 2 | 1 | #####    | #####    |  |
| 28 | 1 US | 2020-12 | 3 US-West    | 2 | 2 | #####    | #####    |  |
| 29 | 1 US | 2020-12 | 3 US-West    | 2 | 3 | #####    | #####    |  |
| 30 | 1 US | 2020-12 | 3 US-West    | 2 | 4 | #####    | #####    |  |
| 31 | 1 US | 2020-12 | 3 US-West    | 2 | 5 | #####    | #####    |  |
| 32 | 1 US | 2020-12 | 3 US-West    | 3 | 1 | #####    | #####    |  |
| 33 | 1 US | 2020-12 | 3 US-West    | 3 | 2 | #####    | #####    |  |
| 34 | 1 US | 2020-12 | 3 US-West    | 3 | 3 | #####    | #####    |  |
| 35 | 1 US | 2020-12 | 3 US-West    | 3 | 4 | #####    | #####    |  |
| 36 | 1 US | 2020-12 | 3 US-West    | 3 | 5 | #####    | #####    |  |
| 37 | 1 US | 2020-12 | 4 US-Midwes  | 1 | 1 | 2.225994 | #####    |  |
| 38 | 1 US | 2020-12 | 4 US-Midwes  | 1 | 2 | 2.97971  | #####    |  |
| 39 | 1 US | 2020-12 | 4 US-Midwes  | 1 | 3 | 2.72454  | #####    |  |
| 40 | 1 US | 2020-12 | 4 US-Midwes  | 1 | 4 | 1.469038 | #####    |  |
| 41 | 1 US | 2020-12 | 4 US-Midwes  | 1 | 5 | #####    | #####    |  |
| 42 | 1 US | 2020-12 | 4 US-Midwes  | 2 | 1 | 1.941998 | #####    |  |
| 43 | 1 US | 2020-12 | 4 US-Midwes  | 2 | 2 | 2.02439  | #####    |  |
| 44 | 1 US | 2020-12 | 4 US-Midwes  | 2 | 3 | 2.74     | #####    |  |
| 45 | 1 US | 2020-12 | 4 US-Midwes  | 2 | 4 | 1.617978 | #####    |  |
| 46 | 1 US | 2020-12 | 4 US-Midwes  | 2 | 5 | #####    | #####    |  |
| 47 | 1 US | 2020-12 | 4 US-Midwes  | 3 | 1 | 2.494194 | #####    |  |
| 48 | 1 US | 2020-12 | 4 US-Midwes  | 3 | 2 | 3.451613 | 1.125698 |  |
| 49 | 1 US | 2020-12 | 4 US-Midwes  | 3 | 3 | 2.705882 | #####    |  |
| 50 | 1 US | 2020-12 | 4 US-Midwes  | 3 | 4 | 1.25641  | #####    |  |
| 51 | 1 US | 2020-12 | 4 US-Midwes  | 3 | 5 | #####    | #####    |  |
| 52 | 1 US | 2020-12 | 4 US-Northe  | 1 | 1 | 1.599085 | #####    |  |
| 53 | 1 US | 2020-12 | 4 US-Northe  | 1 | 2 | 2.31012  | #####    |  |
| 54 | 1 US | 2020-12 | 4 US-Northe  | 1 | 3 | 1.787996 | #####    |  |
| 55 | 1 US | 2020-12 | 4 US-Northe  | 1 | 4 | 1.294938 | #####    |  |
| 56 | 1 US | 2020-12 | 4 US-Northe  | 1 | 5 | #####    | #####    |  |
| 57 | 1 US | 2020-12 | 4 US-Northe  | 2 | 1 | 1.525915 | #####    |  |
| 58 | 1 US | 2020-12 | 4 US-Northe  | 2 | 2 | 1.222222 | #####    |  |
| 59 | 1 US | 2020-12 | 4 US-Northe  | 2 | 3 | 2.15625  | #####    |  |
| 60 | 1 US | 2020-12 | 4 US-Northe  | 2 | 3 | 2.15625  | #####    |  |

|    |      |         |              |   |   |          |          |  |
|----|------|---------|--------------|---|---|----------|----------|--|
| 1  |      |         |              |   |   |          |          |  |
| 2  |      |         |              |   |   |          |          |  |
| 3  | 1 US | 2020-12 | 4 US-Northe  | 2 | 4 | 1.406593 | #####    |  |
| 4  | 1 US | 2020-12 | 4 US-Northe  | 2 | 5 | #####    | #####    |  |
| 5  | 1 US | 2020-12 | 4 US-Northe  | 3 | 1 | 1.676291 | #####    |  |
| 6  | 1 US | 2020-12 | 4 US-Northe  | 3 | 2 | 3.190476 | 1.615774 |  |
| 7  | 1 US | 2020-12 | 4 US-Northe  | 3 | 3 | 1.363636 | #####    |  |
| 8  | 1 US | 2020-12 | 4 US-Northe  | 3 | 4 | 1.139535 | #####    |  |
| 9  | 1 US | 2020-12 | 4 US-Northe  | 3 | 5 | #####    | #####    |  |
| 10 | 1 US | 2020-12 | 4 US-Overall | 1 | 1 | 2.105337 | #####    |  |
| 11 | 1 US | 2020-12 | 4 US-Overall | 1 | 2 | 2.567548 | #####    |  |
| 12 | 1 US | 2020-12 | 4 US-Overall | 1 | 3 | 2.534198 | #####    |  |
| 13 | 1 US | 2020-12 | 4 US-Overall | 1 | 4 | 1.852027 | #####    |  |
| 14 | 1 US | 2020-12 | 4 US-Overall | 1 | 5 | #####    | #####    |  |
| 15 | 1 US | 2020-12 | 4 US-Overall | 2 | 1 | 1.878537 | #####    |  |
| 16 | 1 US | 2020-12 | 4 US-Overall | 2 | 2 | 2.461983 | #####    |  |
| 17 | 1 US | 2020-12 | 4 US-Overall | 2 | 3 | 1.961333 | #####    |  |
| 18 | 1 US | 2020-12 | 4 US-Overall | 2 | 4 | 1.990901 | #####    |  |
| 19 | 1 US | 2020-12 | 4 US-Overall | 2 | 5 | #####    | #####    |  |
| 20 | 1 US | 2020-12 | 4 US-Overall | 3 | 1 | 2.31155  | #####    |  |
| 21 | 1 US | 2020-12 | 4 US-Overall | 3 | 2 | 2.648191 | #####    |  |
| 22 | 1 US | 2020-12 | 4 US-Overall | 3 | 3 | 2.989852 | #####    |  |
| 23 | 1 US | 2020-12 | 4 US-Overall | 3 | 4 | 1.683852 | #####    |  |
| 24 | 1 US | 2020-12 | 4 US-Overall | 3 | 5 | #####    | #####    |  |
| 25 | 1 US | 2020-12 | 4 US-Overall | 3 | 5 | #####    | #####    |  |
| 26 | 1 US | 2020-12 | 4 US-South   | 1 | 1 | 1.945108 | #####    |  |
| 27 | 1 US | 2020-12 | 4 US-South   | 1 | 2 | 1.930351 | #####    |  |
| 28 | 1 US | 2020-12 | 4 US-South   | 1 | 3 | 2.432346 | #####    |  |
| 29 | 1 US | 2020-12 | 4 US-South   | 1 | 4 | 2.042038 | #####    |  |
| 30 | 1 US | 2020-12 | 4 US-South   | 1 | 5 | #####    | #####    |  |
| 31 | 1 US | 2020-12 | 4 US-South   | 2 | 1 | 1.902956 | #####    |  |
| 32 | 1 US | 2020-12 | 4 US-South   | 2 | 2 | 2.5      | #####    |  |
| 33 | 1 US | 2020-12 | 4 US-South   | 2 | 3 | 1.3625   | #####    |  |
| 34 | 1 US | 2020-12 | 4 US-South   | 2 | 4 | 2.652174 | #####    |  |
| 35 | 1 US | 2020-12 | 4 US-South   | 2 | 5 | #####    | #####    |  |
| 36 | 1 US | 2020-12 | 4 US-South   | 3 | 1 | 1.982022 | #####    |  |
| 37 | 1 US | 2020-12 | 4 US-South   | 3 | 2 | 1.363636 | #####    |  |
| 38 | 1 US | 2020-12 | 4 US-South   | 3 | 3 | 3.093023 | #####    |  |
| 39 | 1 US | 2020-12 | 4 US-South   | 3 | 4 | 1.396552 | #####    |  |
| 40 | 1 US | 2020-12 | 4 US-South   | 3 | 5 | 0.08     | #####    |  |
| 41 | 1 US | 2020-12 | 4 US-West    | 1 | 1 | 2.771237 | #####    |  |
| 42 | 1 US | 2020-12 | 4 US-West    | 1 | 2 | 3.717216 | #####    |  |
| 43 | 1 US | 2020-12 | 4 US-West    | 1 | 3 | 3.20633  | #####    |  |
| 44 | 1 US | 2020-12 | 4 US-West    | 1 | 4 | 2.328891 | #####    |  |
| 45 | 1 US | 2020-12 | 4 US-West    | 1 | 5 | #####    | #####    |  |
| 46 | 1 US | 2020-12 | 4 US-West    | 2 | 1 | 2.115952 | #####    |  |
| 47 | 1 US | 2020-12 | 4 US-West    | 2 | 2 | 3.897436 | #####    |  |
| 48 | 1 US | 2020-12 | 4 US-West    | 2 | 3 | 2.135135 | #####    |  |
| 49 | 1 US | 2020-12 | 4 US-West    | 2 | 4 | 1.632911 | #####    |  |
| 50 | 1 US | 2020-12 | 4 US-West    | 2 | 5 | 0.25     | #####    |  |
| 51 | 1 US | 2020-12 | 4 US-West    | 3 | 1 | 3.318555 | #####    |  |
| 52 | 1 US | 2020-12 | 4 US-West    | 3 | 2 | 3.607143 | 1.139929 |  |
| 53 | 1 US | 2020-12 | 4 US-West    | 3 | 3 | 3.97619  | #####    |  |
| 54 | 1 US | 2020-12 | 4 US-West    | 3 | 4 | 3.181818 | #####    |  |
| 55 | 1 US | 2020-12 | 4 US-West    | 3 | 5 | #####    | #####    |  |
| 56 | 1 US | 2020-12 | 4 US-West    | 3 | 5 | #####    | #####    |  |
| 57 | 1 US | 2020-12 | 5 US-Midwes  | 1 | 1 | 2.629431 | #####    |  |
| 58 | 1 US | 2020-12 | 5 US-Midwes  | 1 | 2 | 3.74684  | #####    |  |
| 59 | 1 US | 2020-12 | 5 US-Midwes  | 1 | 3 | 1.990349 | #####    |  |
| 60 | 1 US | 2020-12 | 5 US-Midwes  | 1 | 4 | 2.068829 | #####    |  |



|    |      |         |              |   |   |          |          |  |
|----|------|---------|--------------|---|---|----------|----------|--|
| 1  |      |         |              |   |   |          |          |  |
| 2  |      |         |              |   |   |          |          |  |
| 3  | 1 US | 2020-12 | 5 US-Midwes  | 1 | 5 | 2.181409 | #####    |  |
| 4  | 1 US | 2020-12 | 5 US-Midwes  | 2 | 1 | 1.894454 | #####    |  |
| 5  | 1 US | 2020-12 | 5 US-Midwes  | 2 | 2 | 2.265306 | #####    |  |
| 6  | 1 US | 2020-12 | 5 US-Midwes  | 2 | 3 | 1.820755 | #####    |  |
| 7  | 1 US | 2020-12 | 5 US-Midwes  | 2 | 4 | 1.977273 | #####    |  |
| 8  | 1 US | 2020-12 | 5 US-Midwes  | 2 | 5 | 1.344828 | #####    |  |
| 9  | 1 US | 2020-12 | 5 US-Midwes  | 3 | 1 | 3.28852  | #####    |  |
| 10 | 1 US | 2020-12 | 5 US-Midwes  | 3 | 2 | 4.5      | 1.206704 |  |
| 11 | 1 US | 2020-12 | 5 US-Midwes  | 3 | 3 | 2.179487 | #####    |  |
| 12 | 1 US | 2020-12 | 5 US-Midwes  | 3 | 4 | 2.186047 | #####    |  |
| 13 | 1 US | 2020-12 | 5 US-Midwes  | 3 | 5 | 3.214286 | #####    |  |
| 14 | 1 US | 2020-12 | 5 US-Northea | 1 | 1 | 1.699397 | #####    |  |
| 15 | 1 US | 2020-12 | 5 US-Northea | 1 | 2 | 1.497847 | #####    |  |
| 16 | 1 US | 2020-12 | 5 US-Northea | 1 | 3 | 1.64239  | #####    |  |
| 17 | 1 US | 2020-12 | 5 US-Northea | 1 | 4 | 1.86503  | #####    |  |
| 18 | 1 US | 2020-12 | 5 US-Northea | 1 | 5 | 1.954286 | #####    |  |
| 19 | 1 US | 2020-12 | 5 US-Northea | 2 | 1 | 1.764121 | #####    |  |
| 20 | 1 US | 2020-12 | 5 US-Northea | 2 | 2 | 1.770833 | #####    |  |
| 21 | 1 US | 2020-12 | 5 US-Northea | 2 | 3 | 1.434343 | #####    |  |
| 22 | 1 US | 2020-12 | 5 US-Northea | 2 | 4 | 2        | #####    |  |
| 23 | 1 US | 2020-12 | 5 US-Northea | 2 | 5 | 2.12     | #####    |  |
| 24 | 1 US | 2020-12 | 5 US-Northea | 3 | 1 | 1.633589 | #####    |  |
| 25 | 1 US | 2020-12 | 5 US-Northea | 3 | 2 | 1.291667 | #####    |  |
| 26 | 1 US | 2020-12 | 5 US-Northea | 3 | 3 | 1.882353 | #####    |  |
| 27 | 1 US | 2020-12 | 5 US-Northea | 3 | 4 | 1.6875   | #####    |  |
| 28 | 1 US | 2020-12 | 5 US-Northea | 3 | 5 | 1.807018 | #####    |  |
| 29 | 1 US | 2020-12 | 5 US-Overall | 1 | 1 | 2.080302 | #####    |  |
| 30 | 1 US | 2020-12 | 5 US-Overall | 1 | 2 | 2.162236 | #####    |  |
| 31 | 1 US | 2020-12 | 5 US-Overall | 1 | 3 | 2.039571 | #####    |  |
| 32 | 1 US | 2020-12 | 5 US-Overall | 1 | 4 | 1.987346 | #####    |  |
| 33 | 1 US | 2020-12 | 5 US-Overall | 1 | 5 | 2.146004 | #####    |  |
| 34 | 1 US | 2020-12 | 5 US-Overall | 2 | 1 | 1.919585 | #####    |  |
| 35 | 1 US | 2020-12 | 5 US-Overall | 2 | 2 | 1.894537 | #####    |  |
| 36 | 1 US | 2020-12 | 5 US-Overall | 2 | 3 | 2.002921 | #####    |  |
| 37 | 1 US | 2020-12 | 5 US-Overall | 2 | 4 | 1.996696 | #####    |  |
| 38 | 1 US | 2020-12 | 5 US-Overall | 2 | 5 | 1.645716 | #####    |  |
| 39 | 1 US | 2020-12 | 5 US-Overall | 3 | 1 | 2.222124 | #####    |  |
| 40 | 1 US | 2020-12 | 5 US-Overall | 3 | 2 | 2.358176 | #####    |  |
| 41 | 1 US | 2020-12 | 5 US-Overall | 3 | 3 | 2.068283 | #####    |  |
| 42 | 1 US | 2020-12 | 5 US-Overall | 3 | 4 | 1.976408 | #####    |  |
| 43 | 1 US | 2020-12 | 5 US-Overall | 3 | 5 | 2.752628 | #####    |  |
| 44 | 1 US | 2020-12 | 5 US-South   | 1 | 1 | 1.992776 | #####    |  |
| 45 | 1 US | 2020-12 | 5 US-South   | 1 | 2 | 1.951844 | #####    |  |
| 46 | 1 US | 2020-12 | 5 US-South   | 1 | 3 | 1.994937 | #####    |  |
| 47 | 1 US | 2020-12 | 5 US-South   | 1 | 4 | 1.978669 | #####    |  |
| 48 | 1 US | 2020-12 | 5 US-South   | 1 | 5 | 2.137304 | #####    |  |
| 49 | 1 US | 2020-12 | 5 US-South   | 2 | 1 | 1.947544 | #####    |  |
| 50 | 1 US | 2020-12 | 5 US-South   | 2 | 2 | 1.734375 | #####    |  |
| 51 | 1 US | 2020-12 | 5 US-South   | 2 | 3 | 2.280488 | #####    |  |
| 52 | 1 US | 2020-12 | 5 US-South   | 2 | 4 | 1.989583 | #####    |  |
| 53 | 1 US | 2020-12 | 5 US-South   | 2 | 5 | 1.671429 | #####    |  |
| 54 | 1 US | 2020-12 | 5 US-South   | 3 | 1 | 2.031489 | #####    |  |
| 55 | 1 US | 2020-12 | 5 US-South   | 3 | 2 | 2.153846 | #####    |  |
| 56 | 1 US | 2020-12 | 5 US-South   | 3 | 3 | 1.822222 | #####    |  |
| 57 | 1 US | 2020-12 | 5 US-South   | 3 | 4 | 1.967213 | #####    |  |
| 58 | 1 US | 2020-12 | 5 US-South   | 3 | 5 | 2.782609 | #####    |  |
| 59 | 1 US | 2020-12 | 5 US-South   | 3 |   |          |          |  |
| 60 | 1 US | 2020-12 | 5 US-South   | 3 |   |          |          |  |

|    |      |         |              |   |   |          |          |  |
|----|------|---------|--------------|---|---|----------|----------|--|
| 1  |      |         |              |   |   |          |          |  |
| 2  |      |         |              |   |   |          |          |  |
| 3  | 1 US | 2020-12 | 5 US-West    | 1 | 1 | 2.114311 | #####    |  |
| 4  | 1 US | 2020-12 | 5 US-West    | 1 | 2 | 1.673914 | #####    |  |
| 5  | 1 US | 2020-12 | 5 US-West    | 1 | 3 | 2.493896 | #####    |  |
| 6  | 1 US | 2020-12 | 5 US-West    | 1 | 4 | 2.063904 | #####    |  |
| 7  | 1 US | 2020-12 | 5 US-West    | 1 | 5 | 2.309146 | #####    |  |
| 8  | 1 US | 2020-12 | 5 US-West    | 2 | 1 | 2.032743 | #####    |  |
| 9  | 1 US | 2020-12 | 5 US-West    | 2 | 2 | 2.106383 | #####    |  |
| 10 | 1 US | 2020-12 | 5 US-West    | 2 | 3 | 2.246753 | #####    |  |
| 11 | 1 US | 2020-12 | 5 US-West    | 2 | 4 | 2.025    | #####    |  |
| 12 | 1 US | 2020-12 | 5 US-West    | 2 | 5 | 1.486111 | #####    |  |
| 13 | 1 US | 2020-12 | 5 US-West    | 3 | 1 | 2.18118  | #####    |  |
| 14 | 1 US | 2020-12 | 5 US-West    | 3 | 2 | 1.411765 | #####    |  |
| 15 | 1 US | 2020-12 | 5 US-West    | 3 | 3 | 2.674419 | #####    |  |
| 16 | 1 US | 2020-12 | 5 US-West    | 3 | 4 | 2.111111 | #####    |  |
| 17 | 1 US | 2020-12 | 5 US-West    | 3 | 5 | 3.365385 | #####    |  |
| 18 | 1 US | 2020-13 | 1 US-Midwes  | 1 | 1 | 4.821614 | #####    |  |
| 19 | 1 US | 2020-13 | 1 US-Midwes  | 1 | 2 | 5.098016 | #####    |  |
| 20 | 1 US | 2020-13 | 1 US-Midwes  | 1 | 3 | 6.43165  | #####    |  |
| 21 | 1 US | 2020-13 | 1 US-Midwes  | 1 | 4 | 4.132521 | #####    |  |
| 22 | 1 US | 2020-13 | 1 US-Midwes  | 1 | 5 | 2.554533 | #####    |  |
| 23 | 1 US | 2020-13 | 1 US-Midwes  | 2 | 1 | 3.797075 | #####    |  |
| 24 | 1 US | 2020-13 | 1 US-Midwes  | 2 | 2 | 4.825    | #####    |  |
| 25 | 1 US | 2020-13 | 1 US-Midwes  | 2 | 3 | 4.585987 | #####    |  |
| 26 | 1 US | 2020-13 | 1 US-Midwes  | 2 | 4 | 3.651685 | #####    |  |
| 27 | 1 US | 2020-13 | 1 US-Midwes  | 2 | 5 | 2.012346 | #####    |  |
| 28 | 1 US | 2020-13 | 1 US-Midwes  | 3 | 1 | 5.937653 | #####    |  |
| 29 | 1 US | 2020-13 | 1 US-Midwes  | 3 | 2 | 5.37931  | 1.008228 |  |
| 30 | 1 US | 2020-13 | 1 US-Midwes  | 3 | 3 | 7.936709 | 1.000976 |  |
| 31 | 1 US | 2020-13 | 1 US-Midwes  | 3 | 4 | 4.702128 | #####    |  |
| 32 | 1 US | 2020-13 | 1 US-Midwes  | 3 | 5 | 3.512195 | #####    |  |
| 33 | 1 US | 2020-13 | 1 US-Northea | 1 | 1 | 4.546159 | #####    |  |
| 34 | 1 US | 2020-13 | 1 US-Northea | 1 | 2 | 4.400292 | #####    |  |
| 35 | 1 US | 2020-13 | 1 US-Northea | 1 | 3 | 4.813576 | #####    |  |
| 36 | 1 US | 2020-13 | 1 US-Northea | 1 | 4 | 5.502147 | #####    |  |
| 37 | 1 US | 2020-13 | 1 US-Northea | 1 | 5 | 2.745778 | #####    |  |
| 38 | 1 US | 2020-13 | 1 US-Northea | 2 | 1 | 3.798957 | #####    |  |
| 39 | 1 US | 2020-13 | 1 US-Northea | 2 | 2 | 4.140351 | #####    |  |
| 40 | 1 US | 2020-13 | 1 US-Northea | 2 | 3 | 3.648855 | #####    |  |
| 41 | 1 US | 2020-13 | 1 US-Northea | 2 | 4 | 4.805369 | #####    |  |
| 42 | 1 US | 2020-13 | 1 US-Northea | 2 | 5 | 2.316667 | #####    |  |
| 43 | 1 US | 2020-13 | 1 US-Northea | 3 | 1 | 5.332892 | #####    |  |
| 44 | 1 US | 2020-13 | 1 US-Northea | 3 | 2 | 4.75     | 1.025117 |  |
| 45 | 1 US | 2020-13 | 1 US-Northea | 3 | 3 | 5.892857 | #####    |  |
| 46 | 1 US | 2020-13 | 1 US-Northea | 3 | 4 | 6.165049 | #####    |  |
| 47 | 1 US | 2020-13 | 1 US-Northea | 3 | 5 | 3.272727 | #####    |  |
| 48 | 1 US | 2020-13 | 1 US-Overall | 1 | 1 | 4.907341 | #####    |  |
| 49 | 1 US | 2020-13 | 1 US-Overall | 1 | 2 | 5.527547 | #####    |  |
| 50 | 1 US | 2020-13 | 1 US-Overall | 1 | 3 | 5.782208 | #####    |  |
| 51 | 1 US | 2020-13 | 1 US-Overall | 1 | 4 | 4.580721 | #####    |  |
| 52 | 1 US | 2020-13 | 1 US-Overall | 1 | 5 | 2.818558 | #####    |  |
| 53 | 1 US | 2020-13 | 1 US-Overall | 2 | 1 | 4.332004 | #####    |  |
| 54 | 1 US | 2020-13 | 1 US-Overall | 2 | 2 | 5.539433 | #####    |  |
| 55 | 1 US | 2020-13 | 1 US-Overall | 2 | 3 | 4.971309 | #####    |  |
| 56 | 1 US | 2020-13 | 1 US-Overall | 2 | 4 | 4.151352 | #####    |  |
| 57 | 1 US | 2020-13 | 1 US-Overall | 2 | 5 | 2.2857   | #####    |  |
| 58 | 1 US | 2020-13 | 1 US-Overall | 3 | 1 | 5.500495 | #####    |  |
| 59 | 1 US | 2020-13 | 1 US-Overall | 3 |   |          |          |  |
| 60 | 1 US | 2020-13 | 1 US-Overall | 3 |   |          |          |  |

|    |      |         |              |   |   |          |          |  |
|----|------|---------|--------------|---|---|----------|----------|--|
| 1  |      |         |              |   |   |          |          |  |
| 2  |      |         |              |   |   |          |          |  |
| 3  | 1 US | 2020-13 | 1 US-Overall | 3 | 2 | 5.514973 | #####    |  |
| 4  | 1 US | 2020-13 | 1 US-Overall | 3 | 3 | 6.425717 | #####    |  |
| 5  | 1 US | 2020-13 | 1 US-Overall | 3 | 4 | 5.103725 | #####    |  |
| 6  | 1 US | 2020-13 | 1 US-Overall | 3 | 5 | 3.540835 | #####    |  |
| 7  | 1 US | 2020-13 | 1 US-South   | 1 | 1 | 5.174279 | #####    |  |
| 8  | 1 US | 2020-13 | 1 US-South   | 1 | 2 | 6.154029 | #####    |  |
| 9  | 1 US | 2020-13 | 1 US-South   | 1 | 3 | 6.066556 | #####    |  |
| 10 | 1 US | 2020-13 | 1 US-South   | 1 | 4 | 4.247192 | #####    |  |
| 11 | 1 US | 2020-13 | 1 US-South   | 1 | 5 | 3.063844 | #####    |  |
| 12 | 1 US | 2020-13 | 1 US-South   | 2 | 1 | 4.718839 | #####    |  |
| 13 | 1 US | 2020-13 | 1 US-South   | 2 | 2 | 6.461538 | #####    |  |
| 14 | 1 US | 2020-13 | 1 US-South   | 2 | 3 | 5.341667 | #####    |  |
| 15 | 1 US | 2020-13 | 1 US-South   | 2 | 4 | 4.084416 | #####    |  |
| 16 | 1 US | 2020-13 | 1 US-South   | 2 | 5 | 2.417266 | #####    |  |
| 17 | 1 US | 2020-13 | 1 US-South   | 3 | 1 | 5.610433 | #####    |  |
| 18 | 1 US | 2020-13 | 1 US-South   | 3 | 2 | 5.826087 | 1.404414 |  |
| 19 | 1 US | 2020-13 | 1 US-South   | 3 | 3 | 6.532258 | #####    |  |
| 20 | 1 US | 2020-13 | 1 US-South   | 3 | 4 | 4.461538 | #####    |  |
| 21 | 1 US | 2020-13 | 1 US-South   | 3 | 5 | 3.907216 | #####    |  |
| 22 | 1 US | 2020-13 | 1 US-South   | 3 | 5 | 3.907216 | #####    |  |
| 23 | 1 US | 2020-13 | 1 US-West    | 1 | 1 | 4.815594 | #####    |  |
| 24 | 1 US | 2020-13 | 1 US-West    | 1 | 2 | 5.531896 | #####    |  |
| 25 | 1 US | 2020-13 | 1 US-West    | 1 | 3 | 5.456306 | #####    |  |
| 26 | 1 US | 2020-13 | 1 US-West    | 1 | 4 | 4.636523 | #####    |  |
| 27 | 1 US | 2020-13 | 1 US-West    | 1 | 5 | 2.745116 | #####    |  |
| 28 | 1 US | 2020-13 | 1 US-West    | 2 | 1 | 4.613404 | #####    |  |
| 29 | 1 US | 2020-13 | 1 US-West    | 2 | 2 | 5.543478 | #####    |  |
| 30 | 1 US | 2020-13 | 1 US-West    | 2 | 3 | 5.596386 | #####    |  |
| 31 | 1 US | 2020-13 | 1 US-West    | 2 | 4 | 4.15847  | #####    |  |
| 32 | 1 US | 2020-13 | 1 US-West    | 2 | 5 | 2.360294 | #####    |  |
| 33 | 1 US | 2020-13 | 1 US-West    | 3 | 1 | 5.036893 | #####    |  |
| 34 | 1 US | 2020-13 | 1 US-West    | 3 | 2 | 5.521739 | 1.172944 |  |
| 35 | 1 US | 2020-13 | 1 US-West    | 3 | 3 | 5.318841 | #####    |  |
| 36 | 1 US | 2020-13 | 1 US-West    | 3 | 4 | 5.3      | #####    |  |
| 37 | 1 US | 2020-13 | 1 US-West    | 3 | 5 | 3.211538 | #####    |  |
| 38 | 1 US | 2020-13 | 2 US-Midwes  | 1 | 1 | 1.975558 | #####    |  |
| 39 | 1 US | 2020-13 | 2 US-Midwes  | 1 | 2 | 2.281699 | #####    |  |
| 40 | 1 US | 2020-13 | 2 US-Midwes  | 1 | 3 | 2.339803 | #####    |  |
| 41 | 1 US | 2020-13 | 2 US-Midwes  | 1 | 4 | 1.712367 | #####    |  |
| 42 | 1 US | 2020-13 | 2 US-Midwes  | 1 | 5 | 1.296038 | #####    |  |
| 43 | 1 US | 2020-13 | 2 US-Midwes  | 2 | 1 | 1.866908 | #####    |  |
| 44 | 1 US | 2020-13 | 2 US-Midwes  | 2 | 2 | 2.024096 | #####    |  |
| 45 | 1 US | 2020-13 | 2 US-Midwes  | 2 | 3 | 2.511905 | #####    |  |
| 46 | 1 US | 2020-13 | 2 US-Midwes  | 2 | 4 | 1.663102 | #####    |  |
| 47 | 1 US | 2020-13 | 2 US-Midwes  | 2 | 5 | 1.09816  | #####    |  |
| 48 | 1 US | 2020-13 | 2 US-Midwes  | 3 | 1 | 2.092153 | #####    |  |
| 49 | 1 US | 2020-13 | 2 US-Midwes  | 3 | 2 | 2.53125  | #####    |  |
| 50 | 1 US | 2020-13 | 2 US-Midwes  | 3 | 3 | 2.195122 | #####    |  |
| 51 | 1 US | 2020-13 | 2 US-Midwes  | 3 | 4 | 1.77     | #####    |  |
| 52 | 1 US | 2020-13 | 2 US-Midwes  | 3 | 5 | 1.635294 | #####    |  |
| 53 | 1 US | 2020-13 | 2 US-Northe  | 1 | 1 | 2.03184  | #####    |  |
| 54 | 1 US | 2020-13 | 2 US-Northe  | 1 | 2 | 2.394447 | #####    |  |
| 55 | 1 US | 2020-13 | 2 US-Northe  | 1 | 3 | 2.423687 | #####    |  |
| 56 | 1 US | 2020-13 | 2 US-Northe  | 1 | 4 | 1.860335 | #####    |  |
| 57 | 1 US | 2020-13 | 2 US-Northe  | 1 | 5 | 1.29183  | #####    |  |
| 58 | 1 US | 2020-13 | 2 US-Northe  | 2 | 1 | 1.979854 | #####    |  |
| 59 | 1 US | 2020-13 | 2 US-Northe  | 2 | 2 | 2.473684 | #####    |  |
| 60 | 1 US | 2020-13 | 2 US-Northe  | 2 | 2 | 2.473684 | #####    |  |

|    |      |         |              |   |   |          |       |  |
|----|------|---------|--------------|---|---|----------|-------|--|
| 1  |      |         |              |   |   |          |       |  |
| 2  |      |         |              |   |   |          |       |  |
| 3  | 1 US | 2020-13 | 2 US-Northe  | 2 | 3 | 2.360902 | ##### |  |
| 4  | 1 US | 2020-13 | 2 US-Northe  | 2 | 4 | 1.847134 | ##### |  |
| 5  | 1 US | 2020-13 | 2 US-Northe  | 2 | 5 | 1.157025 | ##### |  |
| 6  | 1 US | 2020-13 | 2 US-Northe  | 3 | 1 | 2.083712 | ##### |  |
| 7  | 1 US | 2020-13 | 2 US-Northe  | 3 | 2 | 2.294118 | ##### |  |
| 8  | 1 US | 2020-13 | 2 US-Northe  | 3 | 3 | 2.47619  | ##### |  |
| 9  | 1 US | 2020-13 | 2 US-Northe  | 3 | 4 | 1.872727 | ##### |  |
| 10 | 1 US | 2020-13 | 2 US-Northe  | 3 | 5 | 1.455446 | ##### |  |
| 11 | 1 US | 2020-13 | 2 US-Overall | 1 | 1 | 2.035446 | ##### |  |
| 12 | 1 US | 2020-13 | 2 US-Overall | 1 | 2 | 2.320306 | ##### |  |
| 13 | 1 US | 2020-13 | 2 US-Overall | 1 | 3 | 2.357739 | ##### |  |
| 14 | 1 US | 2020-13 | 2 US-Overall | 1 | 4 | 1.791054 | ##### |  |
| 15 | 1 US | 2020-13 | 2 US-Overall | 1 | 5 | 1.344421 | ##### |  |
| 16 | 1 US | 2020-13 | 2 US-Overall | 2 | 1 | 2.071288 | ##### |  |
| 17 | 1 US | 2020-13 | 2 US-Overall | 2 | 2 | 2.425704 | ##### |  |
| 18 | 1 US | 2020-13 | 2 US-Overall | 2 | 3 | 2.586545 | ##### |  |
| 19 | 1 US | 2020-13 | 2 US-Overall | 2 | 4 | 1.798306 | ##### |  |
| 20 | 1 US | 2020-13 | 2 US-Overall | 2 | 5 | 1.230851 | ##### |  |
| 21 | 1 US | 2020-13 | 2 US-Overall | 3 | 1 | 2.000304 | ##### |  |
| 22 | 1 US | 2020-13 | 2 US-Overall | 3 | 2 | 2.220509 | ##### |  |
| 23 | 1 US | 2020-13 | 2 US-Overall | 3 | 3 | 2.183486 | ##### |  |
| 24 | 1 US | 2020-13 | 2 US-Overall | 3 | 4 | 1.782431 | ##### |  |
| 25 | 1 US | 2020-13 | 2 US-Overall | 3 | 5 | 1.495046 | ##### |  |
| 26 | 1 US | 2020-13 | 2 US-South   | 1 | 1 | 2.02195  | ##### |  |
| 27 | 1 US | 2020-13 | 2 US-South   | 1 | 2 | 2.197924 | ##### |  |
| 28 | 1 US | 2020-13 | 2 US-South   | 1 | 3 | 2.295483 | ##### |  |
| 29 | 1 US | 2020-13 | 2 US-South   | 1 | 4 | 1.796838 | ##### |  |
| 30 | 1 US | 2020-13 | 2 US-South   | 1 | 5 | 1.42567  | ##### |  |
| 31 | 1 US | 2020-13 | 2 US-South   | 2 | 1 | 2.157075 | ##### |  |
| 32 | 1 US | 2020-13 | 2 US-South   | 2 | 2 | 2.484848 | ##### |  |
| 33 | 1 US | 2020-13 | 2 US-South   | 2 | 3 | 2.669355 | ##### |  |
| 34 | 1 US | 2020-13 | 2 US-South   | 2 | 4 | 1.872611 | ##### |  |
| 35 | 1 US | 2020-13 | 2 US-South   | 2 | 5 | 1.312057 | ##### |  |
| 36 | 1 US | 2020-13 | 2 US-South   | 3 | 1 | 1.901873 | ##### |  |
| 37 | 1 US | 2020-13 | 2 US-South   | 3 | 2 | 1.923077 | ##### |  |
| 38 | 1 US | 2020-13 | 2 US-South   | 3 | 3 | 2.072464 | ##### |  |
| 39 | 1 US | 2020-13 | 2 US-South   | 3 | 4 | 1.702381 | ##### |  |
| 40 | 1 US | 2020-13 | 2 US-South   | 3 | 5 | 1.568627 | ##### |  |
| 41 | 1 US | 2020-13 | 2 US-West    | 1 | 1 | 2.115075 | ##### |  |
| 42 | 1 US | 2020-13 | 2 US-West    | 1 | 2 | 2.562822 | ##### |  |
| 43 | 1 US | 2020-13 | 2 US-West    | 1 | 3 | 2.431717 | ##### |  |
| 44 | 1 US | 2020-13 | 2 US-West    | 1 | 4 | 1.787981 | ##### |  |
| 45 | 1 US | 2020-13 | 2 US-West    | 1 | 5 | 1.303329 | ##### |  |
| 46 | 1 US | 2020-13 | 2 US-West    | 2 | 1 | 2.191494 | ##### |  |
| 47 | 1 US | 2020-13 | 2 US-West    | 2 | 2 | 2.74     | ##### |  |
| 48 | 1 US | 2020-13 | 2 US-West    | 2 | 3 | 2.672414 | ##### |  |
| 49 | 1 US | 2020-13 | 2 US-West    | 2 | 4 | 1.765625 | ##### |  |
| 50 | 1 US | 2020-13 | 2 US-West    | 2 | 5 | 1.323529 | ##### |  |
| 51 | 1 US | 2020-13 | 2 US-West    | 3 | 1 | 2.034456 | ##### |  |
| 52 | 1 US | 2020-13 | 2 US-West    | 3 | 2 | 2.433333 | ##### |  |
| 53 | 1 US | 2020-13 | 2 US-West    | 3 | 3 | 2.194444 | ##### |  |
| 54 | 1 US | 2020-13 | 2 US-West    | 3 | 4 | 1.819149 | ##### |  |
| 55 | 1 US | 2020-13 | 2 US-West    | 3 | 5 | 1.278846 | ##### |  |
| 56 | 1 US | 2020-13 | 3 US-Midwes  | 1 | 1 | #####    | ##### |  |
| 57 | 1 US | 2020-13 | 3 US-Midwes  | 1 | 2 | #####    | ##### |  |
| 58 | 1 US | 2020-13 | 3 US-Midwes  | 1 | 3 | 0        | 0     |  |
| 59 | 1 US | 2020-13 | 3 US-Midwes  | 1 | 3 | 0        | 0     |  |
| 60 | 1 US | 2020-13 | 3 US-Midwes  | 1 | 3 | 0        | 0     |  |

|    |      |         |              |   |   |        |       |  |
|----|------|---------|--------------|---|---|--------|-------|--|
| 1  |      |         |              |   |   |        |       |  |
| 2  |      |         |              |   |   |        |       |  |
| 3  | 1 US | 2020-13 | 3 US-Midwes  | 1 | 4 | #####  | ##### |  |
| 4  | 1 US | 2020-13 | 3 US-Midwes  | 1 | 5 | #####  | ##### |  |
| 5  | 1 US | 2020-13 | 3 US-Midwes  | 2 | 1 | #####  | ##### |  |
| 6  | 1 US | 2020-13 | 3 US-Midwes  | 2 | 2 | #####  | ##### |  |
| 7  | 1 US | 2020-13 | 3 US-Midwes  | 2 | 3 | 0      | 0     |  |
| 8  | 1 US | 2020-13 | 3 US-Midwes  | 2 | 4 | #####  | ##### |  |
| 9  | 1 US | 2020-13 | 3 US-Midwes  | 2 | 5 | 0      | 0     |  |
| 10 | 1 US | 2020-13 | 3 US-Midwes  | 3 | 1 | #####  | ##### |  |
| 11 | 1 US | 2020-13 | 3 US-Midwes  | 3 | 2 | 0.1875 | ##### |  |
| 12 | 1 US | 2020-13 | 3 US-Midwes  | 3 | 3 | 0      | 0     |  |
| 13 | 1 US | 2020-13 | 3 US-Midwes  | 3 | 4 | 0      | 0     |  |
| 14 | 1 US | 2020-13 | 3 US-Midwes  | 3 | 5 | #####  | ##### |  |
| 15 | 1 US | 2020-13 | 3 US-Northea | 1 | 1 | #####  | ##### |  |
| 16 | 1 US | 2020-13 | 3 US-Northea | 1 | 2 | 0      | 0     |  |
| 17 | 1 US | 2020-13 | 3 US-Northea | 1 | 3 | #####  | ##### |  |
| 18 | 1 US | 2020-13 | 3 US-Northea | 1 | 4 | 0      | 0     |  |
| 19 | 1 US | 2020-13 | 3 US-Northea | 1 | 5 | 0      | 0     |  |
| 20 | 1 US | 2020-13 | 3 US-Northea | 2 | 1 | 0      | 0     |  |
| 21 | 1 US | 2020-13 | 3 US-Northea | 2 | 2 | 0      | 0     |  |
| 22 | 1 US | 2020-13 | 3 US-Northea | 2 | 3 | 0      | 0     |  |
| 23 | 1 US | 2020-13 | 3 US-Northea | 2 | 4 | 0      | 0     |  |
| 24 | 1 US | 2020-13 | 3 US-Northea | 2 | 5 | 0      | 0     |  |
| 25 | 1 US | 2020-13 | 3 US-Northea | 3 | 1 | #####  | ##### |  |
| 26 | 1 US | 2020-13 | 3 US-Northea | 3 | 2 | 0      | 0     |  |
| 27 | 1 US | 2020-13 | 3 US-Northea | 3 | 3 | #####  | ##### |  |
| 28 | 1 US | 2020-13 | 3 US-Northea | 3 | 4 | 0      | 0     |  |
| 29 | 1 US | 2020-13 | 3 US-Northea | 3 | 5 | 0      | 0     |  |
| 30 | 1 US | 2020-13 | 3 US-Northea | 3 | 1 | #####  | ##### |  |
| 31 | 1 US | 2020-13 | 3 US-Overall | 1 | 2 | #####  | ##### |  |
| 32 | 1 US | 2020-13 | 3 US-Overall | 1 | 3 | #####  | ##### |  |
| 33 | 1 US | 2020-13 | 3 US-Overall | 1 | 4 | #####  | ##### |  |
| 34 | 1 US | 2020-13 | 3 US-Overall | 1 | 5 | #####  | ##### |  |
| 35 | 1 US | 2020-13 | 3 US-Overall | 1 | 1 | #####  | ##### |  |
| 36 | 1 US | 2020-13 | 3 US-Overall | 2 | 2 | #####  | ##### |  |
| 37 | 1 US | 2020-13 | 3 US-Overall | 2 | 3 | 0      | 0     |  |
| 38 | 1 US | 2020-13 | 3 US-Overall | 2 | 4 | #####  | ##### |  |
| 39 | 1 US | 2020-13 | 3 US-Overall | 2 | 5 | #####  | ##### |  |
| 40 | 1 US | 2020-13 | 3 US-Overall | 3 | 1 | #####  | ##### |  |
| 41 | 1 US | 2020-13 | 3 US-Overall | 3 | 2 | #####  | ##### |  |
| 42 | 1 US | 2020-13 | 3 US-Overall | 3 | 3 | #####  | ##### |  |
| 43 | 1 US | 2020-13 | 3 US-Overall | 3 | 4 | #####  | ##### |  |
| 44 | 1 US | 2020-13 | 3 US-Overall | 3 | 5 | #####  | ##### |  |
| 45 | 1 US | 2020-13 | 3 US-South   | 1 | 1 | #####  | ##### |  |
| 46 | 1 US | 2020-13 | 3 US-South   | 1 | 2 | #####  | ##### |  |
| 47 | 1 US | 2020-13 | 3 US-South   | 1 | 3 | #####  | ##### |  |
| 48 | 1 US | 2020-13 | 3 US-South   | 1 | 4 | #####  | ##### |  |
| 49 | 1 US | 2020-13 | 3 US-South   | 1 | 5 | #####  | ##### |  |
| 50 | 1 US | 2020-13 | 3 US-South   | 2 | 1 | #####  | ##### |  |
| 51 | 1 US | 2020-13 | 3 US-South   | 2 | 2 | #####  | ##### |  |
| 52 | 1 US | 2020-13 | 3 US-South   | 2 | 3 | 0      | 0     |  |
| 53 | 1 US | 2020-13 | 3 US-South   | 2 | 4 | #####  | ##### |  |
| 54 | 1 US | 2020-13 | 3 US-South   | 2 | 5 | #####  | ##### |  |
| 55 | 1 US | 2020-13 | 3 US-South   | 3 | 1 | #####  | ##### |  |
| 56 | 1 US | 2020-13 | 3 US-South   | 3 | 2 | #####  | ##### |  |
| 57 | 1 US | 2020-13 | 3 US-South   | 3 | 3 | #####  | ##### |  |
| 58 | 1 US | 2020-13 | 3 US-South   | 3 | 4 | 0      | 0     |  |
| 59 | 1 US | 2020-13 | 3 US-South   | 3 | 5 | #####  | ##### |  |
| 60 | 1 US | 2020-13 | 3 US-South   | 3 | 1 | #####  | ##### |  |

1  
2  
3  
4  
5  
6  
7  
8  
9  
10  
11  
12  
13  
14  
15  
16  
17  
18  
19  
20  
21  
22  
23  
24  
25  
26  
27  
28  
29  
30  
31  
32  
33  
34  
35  
36  
37  
38  
39  
40  
41  
42  
43  
44  
45  
46  
47  
48  
49  
50  
51  
52  
53  
54  
55  
56  
57  
58  
59  
60

|      |         |              |   |   |          |       |
|------|---------|--------------|---|---|----------|-------|
| 1 US | 2020-13 | 3 US-South   | 3 | 5 | #####    | ##### |
| 1 US | 2020-13 | 3 US-West    | 1 | 1 | #####    | ##### |
| 1 US | 2020-13 | 3 US-West    | 1 | 2 | #####    | ##### |
| 1 US | 2020-13 | 3 US-West    | 1 | 3 | 0        | 0     |
| 1 US | 2020-13 | 3 US-West    | 1 | 4 | #####    | ##### |
| 1 US | 2020-13 | 3 US-West    | 1 | 5 | #####    | ##### |
| 1 US | 2020-13 | 3 US-West    | 2 | 1 | #####    | ##### |
| 1 US | 2020-13 | 3 US-West    | 2 | 2 | 0.16     | ##### |
| 1 US | 2020-13 | 3 US-West    | 2 | 3 | 0        | 0     |
| 1 US | 2020-13 | 3 US-West    | 2 | 4 | 0        | 0     |
| 1 US | 2020-13 | 3 US-West    | 2 | 5 | 0        | 0     |
| 1 US | 2020-13 | 3 US-West    | 3 | 1 | #####    | ##### |
| 1 US | 2020-13 | 3 US-West    | 3 | 2 | 0.4      | ##### |
| 1 US | 2020-13 | 3 US-West    | 3 | 3 | 0        | 0     |
| 1 US | 2020-13 | 3 US-West    | 3 | 4 | #####    | ##### |
| 1 US | 2020-13 | 3 US-West    | 3 | 5 | #####    | ##### |
| 1 US | 2020-13 | 4 US-Midwes  | 1 | 1 | 1.620205 | ##### |
| 1 US | 2020-13 | 4 US-Midwes  | 1 | 2 | 1.898506 | ##### |
| 1 US | 2020-13 | 4 US-Midwes  | 1 | 3 | 2.589176 | ##### |
| 1 US | 2020-13 | 4 US-Midwes  | 1 | 4 | 1.183529 | ##### |
| 1 US | 2020-13 | 4 US-Midwes  | 1 | 5 | #####    | ##### |
| 1 US | 2020-13 | 4 US-Midwes  | 2 | 1 | 1.115713 | ##### |
| 1 US | 2020-13 | 4 US-Midwes  | 2 | 2 | 1.8      | ##### |
| 1 US | 2020-13 | 4 US-Midwes  | 2 | 3 | 1.53125  | ##### |
| 1 US | 2020-13 | 4 US-Midwes  | 2 | 4 | #####    | ##### |
| 1 US | 2020-13 | 4 US-Midwes  | 2 | 5 | #####    | ##### |
| 1 US | 2020-13 | 4 US-Midwes  | 3 | 1 | 2.170236 | ##### |
| 1 US | 2020-13 | 4 US-Midwes  | 3 | 2 | 2        | ##### |
| 1 US | 2020-13 | 4 US-Midwes  | 3 | 3 | 3.468354 | ##### |
| 1 US | 2020-13 | 4 US-Midwes  | 3 | 4 | 1.431579 | ##### |
| 1 US | 2020-13 | 4 US-Midwes  | 3 | 5 | #####    | ##### |
| 1 US | 2020-13 | 4 US-Northea | 1 | 1 | 1.382929 | ##### |
| 1 US | 2020-13 | 4 US-Northea | 1 | 2 | #####    | ##### |
| 1 US | 2020-13 | 4 US-Northea | 1 | 3 | 1.815537 | ##### |
| 1 US | 2020-13 | 4 US-Northea | 1 | 4 | 1.925432 | ##### |
| 1 US | 2020-13 | 4 US-Northea | 1 | 5 | #####    | ##### |
| 1 US | 2020-13 | 4 US-Northea | 2 | 1 | #####    | ##### |
| 1 US | 2020-13 | 4 US-Northea | 2 | 2 | 1        | ##### |
| 1 US | 2020-13 | 4 US-Northea | 2 | 3 | #####    | ##### |
| 1 US | 2020-13 | 4 US-Northea | 2 | 4 | 1.585526 | ##### |
| 1 US | 2020-13 | 4 US-Northea | 2 | 5 | #####    | ##### |
| 1 US | 2020-13 | 4 US-Northea | 3 | 1 | 1.912077 | ##### |
| 1 US | 2020-13 | 4 US-Northea | 3 | 2 | #####    | ##### |
| 1 US | 2020-13 | 4 US-Northea | 3 | 3 | 2.95     | ##### |
| 1 US | 2020-13 | 4 US-Northea | 3 | 4 | 2.242991 | ##### |
| 1 US | 2020-13 | 4 US-Northea | 3 | 5 | #####    | ##### |
| 1 US | 2020-13 | 4 US-Overall | 1 | 1 | 1.539791 | ##### |
| 1 US | 2020-13 | 4 US-Overall | 1 | 2 | 1.757464 | ##### |
| 1 US | 2020-13 | 4 US-Overall | 1 | 3 | 2.223859 | ##### |
| 1 US | 2020-13 | 4 US-Overall | 1 | 4 | 1.293804 | ##### |
| 1 US | 2020-13 | 4 US-Overall | 1 | 5 | #####    | ##### |
| 1 US | 2020-13 | 4 US-Overall | 2 | 1 | 1.149771 | ##### |
| 1 US | 2020-13 | 4 US-Overall | 2 | 2 | 1.602828 | ##### |
| 1 US | 2020-13 | 4 US-Overall | 2 | 3 | 1.41905  | ##### |
| 1 US | 2020-13 | 4 US-Overall | 2 | 4 | 1.166862 | ##### |
| 1 US | 2020-13 | 4 US-Overall | 2 | 5 | #####    | ##### |

|    |      |         |              |   |   |          |          |  |
|----|------|---------|--------------|---|---|----------|----------|--|
| 1  |      |         |              |   |   |          |          |  |
| 2  |      |         |              |   |   |          |          |  |
| 3  | 1 US | 2020-13 | 4 US-Overall | 3 | 1 | 1.936068 | #####    |  |
| 4  | 1 US | 2020-13 | 4 US-Overall | 3 | 2 | 1.920256 | #####    |  |
| 5  | 1 US | 2020-13 | 4 US-Overall | 3 | 3 | 2.852223 | #####    |  |
| 6  | 1 US | 2020-13 | 4 US-Overall | 3 | 4 | 1.445419 | #####    |  |
| 7  | 1 US | 2020-13 | 4 US-Overall | 3 | 5 | #####    | #####    |  |
| 8  | 1 US | 2020-13 | 4 US-South   | 1 | 1 | 1.680769 | #####    |  |
| 9  | 1 US | 2020-13 | 4 US-South   | 1 | 2 | 2.264789 | #####    |  |
| 10 | 1 US | 2020-13 | 4 US-South   | 1 | 3 | 2.44581  | #####    |  |
| 11 | 1 US | 2020-13 | 4 US-South   | 1 | 4 | #####    | #####    |  |
| 12 | 1 US | 2020-13 | 4 US-South   | 1 | 5 | #####    | #####    |  |
| 13 | 1 US | 2020-13 | 4 US-South   | 2 | 1 | 1.164774 | #####    |  |
| 14 | 1 US | 2020-13 | 4 US-South   | 2 | 2 | 1.738462 | #####    |  |
| 15 | 1 US | 2020-13 | 4 US-South   | 2 | 3 | 1.38843  | #####    |  |
| 16 | 1 US | 2020-13 | 4 US-South   | 2 | 4 | 1.012821 | #####    |  |
| 17 | 1 US | 2020-13 | 4 US-South   | 2 | 5 | 0.3      | #####    |  |
| 18 | 1 US | 2020-13 | 4 US-South   | 3 | 1 | 2.166297 | #####    |  |
| 19 | 1 US | 2020-13 | 4 US-South   | 3 | 2 | 2.826087 | 1.425789 |  |
| 20 | 1 US | 2020-13 | 4 US-South   | 3 | 3 | 3.109375 | #####    |  |
| 21 | 1 US | 2020-13 | 4 US-South   | 3 | 4 | 0.775    | #####    |  |
| 22 | 1 US | 2020-13 | 4 US-South   | 3 | 5 | #####    | #####    |  |
| 23 | 1 US | 2020-13 | 4 US-South   | 3 | 5 | #####    | #####    |  |
| 24 | 1 US | 2020-13 | 4 US-West    | 1 | 1 | 1.350599 | #####    |  |
| 25 | 1 US | 2020-13 | 4 US-West    | 1 | 2 | 1.131087 | #####    |  |
| 26 | 1 US | 2020-13 | 4 US-West    | 1 | 3 | 1.852223 | #####    |  |
| 27 | 1 US | 2020-13 | 4 US-West    | 1 | 4 | 1.385569 | #####    |  |
| 28 | 1 US | 2020-13 | 4 US-West    | 1 | 5 | #####    | #####    |  |
| 29 | 1 US | 2020-13 | 4 US-West    | 2 | 1 | 1.382981 | #####    |  |
| 30 | 1 US | 2020-13 | 4 US-West    | 2 | 2 | 1.617021 | #####    |  |
| 31 | 1 US | 2020-13 | 4 US-West    | 2 | 3 | 1.952096 | #####    |  |
| 32 | 1 US | 2020-13 | 4 US-West    | 2 | 4 | 1.228261 | #####    |  |
| 33 | 1 US | 2020-13 | 4 US-West    | 2 | 5 | #####    | #####    |  |
| 34 | 1 US | 2020-13 | 4 US-West    | 3 | 1 | 1.315279 | #####    |  |
| 35 | 1 US | 2020-13 | 4 US-West    | 3 | 2 | #####    | #####    |  |
| 36 | 1 US | 2020-13 | 4 US-West    | 3 | 3 | 1.753623 | #####    |  |
| 37 | 1 US | 2020-13 | 4 US-West    | 3 | 4 | 1.595745 | #####    |  |
| 38 | 1 US | 2020-13 | 4 US-West    | 3 | 5 | #####    | #####    |  |
| 39 | 1 US | 2020-13 | 5 US-Midwes  | 1 | 1 | 1.345521 | #####    |  |
| 40 | 1 US | 2020-13 | 5 US-Midwes  | 1 | 2 | #####    | #####    |  |
| 41 | 1 US | 2020-13 | 5 US-Midwes  | 1 | 3 | 1.567393 | #####    |  |
| 42 | 1 US | 2020-13 | 5 US-Midwes  | 1 | 4 | 1.525262 | #####    |  |
| 43 | 1 US | 2020-13 | 5 US-Midwes  | 1 | 5 | 1.141544 | #####    |  |
| 44 | 1 US | 2020-13 | 5 US-Midwes  | 2 | 1 | #####    | #####    |  |
| 45 | 1 US | 2020-13 | 5 US-Midwes  | 2 | 2 | #####    | #####    |  |
| 46 | 1 US | 2020-13 | 5 US-Midwes  | 2 | 3 | #####    | #####    |  |
| 47 | 1 US | 2020-13 | 5 US-Midwes  | 2 | 4 | 1.244681 | #####    |  |
| 48 | 1 US | 2020-13 | 5 US-Midwes  | 2 | 5 | #####    | #####    |  |
| 49 | 1 US | 2020-13 | 5 US-Midwes  | 3 | 1 | 1.838045 | #####    |  |
| 50 | 1 US | 2020-13 | 5 US-Midwes  | 3 | 2 | 1.03125  | #####    |  |
| 51 | 1 US | 2020-13 | 5 US-Midwes  | 3 | 3 | 2.361446 | #####    |  |
| 52 | 1 US | 2020-13 | 5 US-Midwes  | 3 | 4 | 1.858586 | #####    |  |
| 53 | 1 US | 2020-13 | 5 US-Midwes  | 3 | 5 | 1.72619  | #####    |  |
| 54 | 1 US | 2020-13 | 5 US-Northe  | 1 | 1 | 1.420487 | #####    |  |
| 55 | 1 US | 2020-13 | 5 US-Northe  | 1 | 2 | 1.125238 | #####    |  |
| 56 | 1 US | 2020-13 | 5 US-Northe  | 1 | 3 | 1.223027 | #####    |  |
| 57 | 1 US | 2020-13 | 5 US-Northe  | 1 | 4 | 1.908428 | #####    |  |
| 58 | 1 US | 2020-13 | 5 US-Northe  | 1 | 5 | 1.258706 | #####    |  |
| 59 | 1 US | 2020-13 | 5 US-Northe  | 1 | 5 | 1.258706 | #####    |  |
| 60 | 1 US | 2020-13 | 5 US-Northe  | 2 | 1 | 1.036007 | #####    |  |

|    |      |         |              |   |   |          |       |
|----|------|---------|--------------|---|---|----------|-------|
| 1  |      |         |              |   |   |          |       |
| 2  |      |         |              |   |   |          |       |
| 3  | 1 US | 2020-13 | 5 US-Northea | 2 | 2 | #####    | ##### |
| 4  | 1 US | 2020-13 | 5 US-Northea | 2 | 3 | #####    | ##### |
| 5  | 1 US | 2020-13 | 5 US-Northea | 2 | 4 | 1.633987 | ##### |
| 6  | 1 US | 2020-13 | 5 US-Northea | 2 | 5 | #####    | ##### |
| 7  | 1 US | 2020-13 | 5 US-Northea | 3 | 1 | 1.81601  | ##### |
| 8  | 1 US | 2020-13 | 5 US-Northea | 3 | 2 | 1.705882 | ##### |
| 9  | 1 US | 2020-13 | 5 US-Northea | 3 | 3 | 1.610169 | ##### |
| 10 | 1 US | 2020-13 | 5 US-Northea | 3 | 4 | 2.171429 | ##### |
| 11 | 1 US | 2020-13 | 5 US-Northea | 3 | 5 | 1.693069 | ##### |
| 12 | 1 US | 2020-13 | 5 US-Overall | 1 | 1 | 1.458463 | ##### |
| 13 | 1 US | 2020-13 | 5 US-Overall | 1 | 2 | 1.571055 | ##### |
| 14 | 1 US | 2020-13 | 5 US-Overall | 1 | 3 | 1.387714 | ##### |
| 15 | 1 US | 2020-13 | 5 US-Overall | 1 | 4 | 1.577944 | ##### |
| 16 | 1 US | 2020-13 | 5 US-Overall | 1 | 5 | 1.287204 | ##### |
| 17 | 1 US | 2020-13 | 5 US-Overall | 2 | 1 | 1.147191 | ##### |
| 18 | 1 US | 2020-13 | 5 US-Overall | 2 | 2 | 1.397995 | ##### |
| 19 | 1 US | 2020-13 | 5 US-Overall | 2 | 3 | 1.042538 | ##### |
| 20 | 1 US | 2020-13 | 5 US-Overall | 2 | 4 | 1.28605  | ##### |
| 21 | 1 US | 2020-13 | 5 US-Overall | 2 | 5 | #####    | ##### |
| 22 | 1 US | 2020-13 | 5 US-Overall | 3 | 1 | 1.767172 | ##### |
| 23 | 1 US | 2020-13 | 5 US-Overall | 3 | 2 | 1.736336 | ##### |
| 24 | 1 US | 2020-13 | 5 US-Overall | 3 | 3 | 1.65315  | ##### |
| 25 | 1 US | 2020-13 | 5 US-Overall | 3 | 4 | 1.93027  | ##### |
| 26 | 1 US | 2020-13 | 5 US-Overall | 3 | 5 | 1.878446 | ##### |
| 27 | 1 US | 2020-13 | 5 US-South   | 1 | 1 | 1.571243 | ##### |
| 28 | 1 US | 2020-13 | 5 US-South   | 1 | 2 | 1.874722 | ##### |
| 29 | 1 US | 2020-13 | 5 US-South   | 1 | 3 | 1.463001 | ##### |
| 30 | 1 US | 2020-13 | 5 US-South   | 1 | 4 | 1.532292 | ##### |
| 31 | 1 US | 2020-13 | 5 US-South   | 1 | 5 | 1.444672 | ##### |
| 32 | 1 US | 2020-13 | 5 US-South   | 2 | 1 | 1.389791 | ##### |
| 33 | 1 US | 2020-13 | 5 US-South   | 2 | 2 | 1.984848 | ##### |
| 34 | 1 US | 2020-13 | 5 US-South   | 2 | 3 | 1.439024 | ##### |
| 35 | 1 US | 2020-13 | 5 US-South   | 2 | 4 | 1.2      | ##### |
| 36 | 1 US | 2020-13 | 5 US-South   | 2 | 5 | #####    | ##### |
| 37 | 1 US | 2020-13 | 5 US-South   | 3 | 1 | 1.73508  | ##### |
| 38 | 1 US | 2020-13 | 5 US-South   | 3 | 2 | 1.769231 | ##### |
| 39 | 1 US | 2020-13 | 5 US-South   | 3 | 3 | 1.477612 | ##### |
| 40 | 1 US | 2020-13 | 5 US-South   | 3 | 4 | 1.95122  | ##### |
| 41 | 1 US | 2020-13 | 5 US-South   | 3 | 5 | 2.255102 | ##### |
| 42 | 1 US | 2020-13 | 5 US-West    | 1 | 1 | 1.398007 | ##### |
| 43 | 1 US | 2020-13 | 5 US-West    | 1 | 2 | 1.906818 | ##### |
| 44 | 1 US | 2020-13 | 5 US-West    | 1 | 3 | 1.231502 | ##### |
| 45 | 1 US | 2020-13 | 5 US-West    | 1 | 4 | 1.40097  | ##### |
| 46 | 1 US | 2020-13 | 5 US-West    | 1 | 5 | 1.195711 | ##### |
| 47 | 1 US | 2020-13 | 5 US-West    | 2 | 1 | 1.0908   | ##### |
| 48 | 1 US | 2020-13 | 5 US-West    | 2 | 2 | 1.294118 | ##### |
| 49 | 1 US | 2020-13 | 5 US-West    | 2 | 3 | 1.011696 | ##### |
| 50 | 1 US | 2020-13 | 5 US-West    | 2 | 4 | 1.184211 | ##### |
| 51 | 1 US | 2020-13 | 5 US-West    | 2 | 5 | #####    | ##### |
| 52 | 1 US | 2020-13 | 5 US-West    | 3 | 1 | 1.723957 | ##### |
| 53 | 1 US | 2020-13 | 5 US-West    | 3 | 2 | 2.37931  | ##### |
| 54 | 1 US | 2020-13 | 5 US-West    | 3 | 3 | 1.444444 | ##### |
| 55 | 1 US | 2020-13 | 5 US-West    | 3 | 4 | 1.706522 | ##### |
| 56 | 1 US | 2020-13 | 5 US-West    | 3 | 5 | 1.557692 | ##### |
| 57 | 1 US | 2020-14 | 1 US-Midwes  | 1 | 1 | 4.343144 | ##### |
| 58 | 1 US | 2020-14 | 1 US-Midwes  | 1 | 2 | 4.047955 | ##### |
| 59 | 1 US | 2020-14 | 1 US-Midwes  | 1 |   |          |       |
| 60 | 1 US | 2020-14 | 1 US-Midwes  | 1 |   |          |       |



|    |      |         |              |   |   |          |          |  |
|----|------|---------|--------------|---|---|----------|----------|--|
| 1  |      |         |              |   |   |          |          |  |
| 2  |      |         |              |   |   |          |          |  |
| 3  | 1 US | 2020-14 | 1 US-Midwes  | 1 | 3 | 5.675847 | #####    |  |
| 4  | 1 US | 2020-14 | 1 US-Midwes  | 1 | 4 | 4.114802 | #####    |  |
| 5  | 1 US | 2020-14 | 1 US-Midwes  | 1 | 5 | 2.737324 | #####    |  |
| 6  | 1 US | 2020-14 | 1 US-Midwes  | 2 | 1 | 4.007462 | #####    |  |
| 7  | 1 US | 2020-14 | 1 US-Midwes  | 2 | 2 | 3.833333 | #####    |  |
| 8  | 1 US | 2020-14 | 1 US-Midwes  | 2 | 3 | 5.09434  | #####    |  |
| 9  | 1 US | 2020-14 | 1 US-Midwes  | 2 | 4 | 3.842391 | #####    |  |
| 10 | 1 US | 2020-14 | 1 US-Midwes  | 2 | 5 | 2.537815 | #####    |  |
| 11 | 1 US | 2020-14 | 1 US-Midwes  | 3 | 1 | 4.823183 | #####    |  |
| 12 | 1 US | 2020-14 | 1 US-Midwes  | 3 | 2 | 4.357143 | 1.193598 |  |
| 13 | 1 US | 2020-14 | 1 US-Midwes  | 3 | 3 | 6.55814  | 1.016563 |  |
| 14 | 1 US | 2020-14 | 1 US-Midwes  | 3 | 4 | 4.488095 | #####    |  |
| 15 | 1 US | 2020-14 | 1 US-Midwes  | 3 | 5 | 3.012987 | #####    |  |
| 16 | 1 US | 2020-14 | 1 US-Northea | 1 | 1 | 4.423405 | #####    |  |
| 17 | 1 US | 2020-14 | 1 US-Northea | 1 | 2 | 3.544049 | #####    |  |
| 18 | 1 US | 2020-14 | 1 US-Northea | 1 | 3 | 5.340083 | #####    |  |
| 19 | 1 US | 2020-14 | 1 US-Northea | 1 | 4 | 4.483439 | #####    |  |
| 20 | 1 US | 2020-14 | 1 US-Northea | 1 | 5 | 3.376064 | #####    |  |
| 21 | 1 US | 2020-14 | 1 US-Northea | 2 | 1 | 4.006173 | #####    |  |
| 22 | 1 US | 2020-14 | 1 US-Northea | 2 | 2 | 4.916667 | #####    |  |
| 23 | 1 US | 2020-14 | 1 US-Northea | 2 | 3 | 4.537815 | #####    |  |
| 24 | 1 US | 2020-14 | 1 US-Northea | 2 | 4 | 3.733766 | #####    |  |
| 25 | 1 US | 2020-14 | 1 US-Northea | 2 | 5 | 3.215686 | #####    |  |
| 26 | 1 US | 2020-14 | 1 US-Northea | 3 | 1 | 5.122488 | #####    |  |
| 27 | 1 US | 2020-14 | 1 US-Northea | 3 | 2 | 2.3      | #####    |  |
| 28 | 1 US | 2020-14 | 1 US-Northea | 3 | 3 | 6.740741 | 1.675839 |  |
| 29 | 1 US | 2020-14 | 1 US-Northea | 3 | 4 | 5.839286 | #####    |  |
| 30 | 1 US | 2020-14 | 1 US-Northea | 3 | 5 | 3.714286 | #####    |  |
| 31 | 1 US | 2020-14 | 1 US-Overall | 1 | 1 | 4.267982 | #####    |  |
| 32 | 1 US | 2020-14 | 1 US-Overall | 1 | 2 | 3.929979 | #####    |  |
| 33 | 1 US | 2020-14 | 1 US-Overall | 1 | 3 | 5.06026  | #####    |  |
| 34 | 1 US | 2020-14 | 1 US-Overall | 1 | 4 | 4.375459 | #####    |  |
| 35 | 1 US | 2020-14 | 1 US-Overall | 1 | 5 | 2.769437 | #####    |  |
| 36 | 1 US | 2020-14 | 1 US-Overall | 2 | 1 | 3.981872 | #####    |  |
| 37 | 1 US | 2020-14 | 1 US-Overall | 2 | 2 | 4.313334 | #####    |  |
| 38 | 1 US | 2020-14 | 1 US-Overall | 2 | 3 | 4.638204 | #####    |  |
| 39 | 1 US | 2020-14 | 1 US-Overall | 2 | 4 | 3.891621 | #####    |  |
| 40 | 1 US | 2020-14 | 1 US-Overall | 2 | 5 | 2.536219 | #####    |  |
| 41 | 1 US | 2020-14 | 1 US-Overall | 3 | 1 | 4.702029 | #####    |  |
| 42 | 1 US | 2020-14 | 1 US-Overall | 3 | 2 | 3.458518 | #####    |  |
| 43 | 1 US | 2020-14 | 1 US-Overall | 3 | 3 | 5.75995  | #####    |  |
| 44 | 1 US | 2020-14 | 1 US-Overall | 3 | 4 | 5.092876 | #####    |  |
| 45 | 1 US | 2020-14 | 1 US-Overall | 3 | 5 | 3.144381 | #####    |  |
| 46 | 1 US | 2020-14 | 1 US-South   | 1 | 1 | 4.148983 | #####    |  |
| 47 | 1 US | 2020-14 | 1 US-South   | 1 | 2 | 3.816618 | #####    |  |
| 48 | 1 US | 2020-14 | 1 US-South   | 1 | 3 | 4.950538 | #####    |  |
| 49 | 1 US | 2020-14 | 1 US-South   | 1 | 4 | 4.22286  | #####    |  |
| 50 | 1 US | 2020-14 | 1 US-South   | 1 | 5 | 2.635639 | #####    |  |
| 51 | 1 US | 2020-14 | 1 US-South   | 2 | 1 | 4.063836 | #####    |  |
| 52 | 1 US | 2020-14 | 1 US-South   | 2 | 2 | 4.902439 | #####    |  |
| 53 | 1 US | 2020-14 | 1 US-South   | 2 | 3 | 4.673611 | #####    |  |
| 54 | 1 US | 2020-14 | 1 US-South   | 2 | 4 | 3.840659 | #####    |  |
| 55 | 1 US | 2020-14 | 1 US-South   | 2 | 5 | 2.371901 | #####    |  |
| 56 | 1 US | 2020-14 | 1 US-South   | 3 | 1 | 4.287494 | #####    |  |
| 57 | 1 US | 2020-14 | 1 US-South   | 3 | 2 | 2.416667 | #####    |  |
| 58 | 1 US | 2020-14 | 1 US-South   | 3 | 3 | 5.48     | 1.490423 |  |
| 59 | 1 US | 2020-14 | 1 US-South   | 3 | 3 | 5.48     | 1.490423 |  |
| 60 | 1 US | 2020-14 | 1 US-South   | 3 | 3 | 5.48     | 1.490423 |  |

|    |      |         |              |   |   |          |          |  |
|----|------|---------|--------------|---|---|----------|----------|--|
| 1  |      |         |              |   |   |          |          |  |
| 2  |      |         |              |   |   |          |          |  |
| 3  | 1 US | 2020-14 | 1 US-South   | 3 | 4 | 4.810127 | #####    |  |
| 4  | 1 US | 2020-14 | 1 US-South   | 3 | 5 | 3.075758 | #####    |  |
| 5  | 1 US | 2020-14 | 1 US-West    | 1 | 1 | 4.296814 | #####    |  |
| 6  | 1 US | 2020-14 | 1 US-West    | 1 | 2 | 4.26592  | #####    |  |
| 7  | 1 US | 2020-14 | 1 US-West    | 1 | 3 | 4.605602 | #####    |  |
| 8  | 1 US | 2020-14 | 1 US-West    | 1 | 4 | 4.832278 | #####    |  |
| 9  | 1 US | 2020-14 | 1 US-West    | 1 | 5 | 2.507649 | #####    |  |
| 10 | 1 US | 2020-14 | 1 US-West    | 2 | 1 | 3.785031 | #####    |  |
| 11 | 1 US | 2020-14 | 1 US-West    | 2 | 2 | 3.324324 | #####    |  |
| 12 | 1 US | 2020-14 | 1 US-West    | 2 | 3 | 4.291391 | #####    |  |
| 13 | 1 US | 2020-14 | 1 US-West    | 2 | 4 | 4.193333 | #####    |  |
| 14 | 1 US | 2020-14 | 1 US-West    | 2 | 5 | 2.151786 | #####    |  |
| 15 | 1 US | 2020-14 | 1 US-West    | 3 | 1 | 4.976415 | #####    |  |
| 16 | 1 US | 2020-14 | 1 US-West    | 3 | 2 | 5.357143 | 1.350062 |  |
| 17 | 1 US | 2020-14 | 1 US-West    | 3 | 3 | 5.045455 | #####    |  |
| 18 | 1 US | 2020-14 | 1 US-West    | 3 | 4 | 5.65     | #####    |  |
| 19 | 1 US | 2020-14 | 1 US-West    | 3 | 5 | 3.013699 | #####    |  |
| 20 | 1 US | 2020-14 | 2 US-Midwes  | 1 | 1 | 1.876083 | #####    |  |
| 21 | 1 US | 2020-14 | 2 US-Midwes  | 1 | 2 | 2.074879 | #####    |  |
| 22 | 1 US | 2020-14 | 2 US-Midwes  | 1 | 3 | 2.235104 | #####    |  |
| 23 | 1 US | 2020-14 | 2 US-Midwes  | 1 | 4 | 1.650115 | #####    |  |
| 24 | 1 US | 2020-14 | 2 US-Midwes  | 1 | 5 | 1.456643 | #####    |  |
| 25 | 1 US | 2020-14 | 2 US-Midwes  | 2 | 1 | 1.920639 | #####    |  |
| 26 | 1 US | 2020-14 | 2 US-Midwes  | 2 | 2 | 2.125    | #####    |  |
| 27 | 1 US | 2020-14 | 2 US-Midwes  | 2 | 3 | 2.29878  | #####    |  |
| 28 | 1 US | 2020-14 | 2 US-Midwes  | 2 | 4 | 1.805128 | #####    |  |
| 29 | 1 US | 2020-14 | 2 US-Midwes  | 2 | 5 | 1.266667 | #####    |  |
| 30 | 1 US | 2020-14 | 2 US-Midwes  | 3 | 1 | 1.812971 | #####    |  |
| 31 | 1 US | 2020-14 | 2 US-Midwes  | 3 | 2 | 2        | #####    |  |
| 32 | 1 US | 2020-14 | 2 US-Midwes  | 3 | 3 | 2.145833 | #####    |  |
| 33 | 1 US | 2020-14 | 2 US-Midwes  | 3 | 4 | 1.430233 | #####    |  |
| 34 | 1 US | 2020-14 | 2 US-Midwes  | 3 | 5 | 1.717949 | #####    |  |
| 35 | 1 US | 2020-14 | 2 US-Northea | 1 | 1 | 2.00816  | #####    |  |
| 36 | 1 US | 2020-14 | 2 US-Northea | 1 | 2 | 2.435415 | #####    |  |
| 37 | 1 US | 2020-14 | 2 US-Northea | 1 | 3 | 2.358128 | #####    |  |
| 38 | 1 US | 2020-14 | 2 US-Northea | 1 | 4 | 1.817058 | #####    |  |
| 39 | 1 US | 2020-14 | 2 US-Northea | 1 | 5 | 1.421448 | #####    |  |
| 40 | 1 US | 2020-14 | 2 US-Northea | 2 | 1 | 1.950099 | #####    |  |
| 41 | 1 US | 2020-14 | 2 US-Northea | 2 | 2 | 2.555556 | #####    |  |
| 42 | 1 US | 2020-14 | 2 US-Northea | 2 | 3 | 2.285714 | #####    |  |
| 43 | 1 US | 2020-14 | 2 US-Northea | 2 | 4 | 1.739394 | #####    |  |
| 44 | 1 US | 2020-14 | 2 US-Northea | 2 | 5 | 1.466019 | #####    |  |
| 45 | 1 US | 2020-14 | 2 US-Northea | 3 | 1 | 2.104853 | #####    |  |
| 46 | 1 US | 2020-14 | 2 US-Northea | 3 | 2 | 2.333333 | #####    |  |
| 47 | 1 US | 2020-14 | 2 US-Northea | 3 | 3 | 2.482759 | #####    |  |
| 48 | 1 US | 2020-14 | 2 US-Northea | 3 | 4 | 1.964912 | #####    |  |
| 49 | 1 US | 2020-14 | 2 US-Northea | 3 | 5 | 1.326531 | #####    |  |
| 50 | 1 US | 2020-14 | 2 US-Overall | 1 | 1 | 1.893545 | #####    |  |
| 51 | 1 US | 2020-14 | 2 US-Overall | 1 | 2 | 2.109402 | #####    |  |
| 52 | 1 US | 2020-14 | 2 US-Overall | 1 | 3 | 2.147792 | #####    |  |
| 53 | 1 US | 2020-14 | 2 US-Overall | 1 | 4 | 1.782112 | #####    |  |
| 54 | 1 US | 2020-14 | 2 US-Overall | 1 | 5 | 1.355343 | #####    |  |
| 55 | 1 US | 2020-14 | 2 US-Overall | 2 | 1 | 1.969663 | #####    |  |
| 56 | 1 US | 2020-14 | 2 US-Overall | 2 | 2 | 2.358681 | #####    |  |
| 57 | 1 US | 2020-14 | 2 US-Overall | 2 | 3 | 2.34021  | #####    |  |
| 58 | 1 US | 2020-14 | 2 US-Overall | 2 | 4 | 1.753707 | #####    |  |
| 59 | 1 US | 2020-14 | 2 US-Overall | 2 |   |          |          |  |
| 60 | 1 US | 2020-14 | 2 US-Overall | 2 |   |          |          |  |

|    |      |         |              |   |   |          |       |  |
|----|------|---------|--------------|---|---|----------|-------|--|
| 1  |      |         |              |   |   |          |       |  |
| 2  |      |         |              |   |   |          |       |  |
| 3  | 1 US | 2020-14 | 2 US-Overall | 2 | 5 | 1.258743 | ##### |  |
| 4  | 1 US | 2020-14 | 2 US-Overall | 3 | 1 | 1.780725 | ##### |  |
| 5  | 1 US | 2020-14 | 2 US-Overall | 3 | 2 | 1.826515 | ##### |  |
| 6  | 1 US | 2020-14 | 2 US-Overall | 3 | 3 | 1.840814 | ##### |  |
| 7  | 1 US | 2020-14 | 2 US-Overall | 3 | 4 | 1.824989 | ##### |  |
| 8  | 1 US | 2020-14 | 2 US-Overall | 3 | 5 | 1.509213 | ##### |  |
| 9  | 1 US | 2020-14 | 2 US-South   | 1 | 1 | 1.841867 | ##### |  |
| 10 | 1 US | 2020-14 | 2 US-South   | 1 | 2 | 2.098608 | ##### |  |
| 11 | 1 US | 2020-14 | 2 US-South   | 1 | 3 | 1.952292 | ##### |  |
| 12 | 1 US | 2020-14 | 2 US-South   | 1 | 4 | 1.847472 | ##### |  |
| 13 | 1 US | 2020-14 | 2 US-South   | 1 | 5 | 1.295218 | ##### |  |
| 14 | 1 US | 2020-14 | 2 US-South   | 2 | 1 | 2.009754 | ##### |  |
| 15 | 1 US | 2020-14 | 2 US-South   | 2 | 2 | 2.690476 | ##### |  |
| 16 | 1 US | 2020-14 | 2 US-South   | 2 | 3 | 2.284768 | ##### |  |
| 17 | 1 US | 2020-14 | 2 US-South   | 2 | 4 | 1.802083 | ##### |  |
| 18 | 1 US | 2020-14 | 2 US-South   | 2 | 5 | 1.157025 | ##### |  |
| 19 | 1 US | 2020-14 | 2 US-South   | 3 | 1 | 1.582184 | ##### |  |
| 20 | 1 US | 2020-14 | 2 US-South   | 3 | 2 | 1.428571 | ##### |  |
| 21 | 1 US | 2020-14 | 2 US-South   | 3 | 3 | 1.357143 | ##### |  |
| 22 | 1 US | 2020-14 | 2 US-South   | 3 | 4 | 1.916667 | ##### |  |
| 23 | 1 US | 2020-14 | 2 US-South   | 3 | 5 | 1.522388 | ##### |  |
| 24 | 1 US | 2020-14 | 2 US-West    | 1 | 1 | 1.918277 | ##### |  |
| 25 | 1 US | 2020-14 | 2 US-West    | 1 | 2 | 1.950727 | ##### |  |
| 26 | 1 US | 2020-14 | 2 US-West    | 1 | 3 | 2.254972 | ##### |  |
| 27 | 1 US | 2020-14 | 2 US-West    | 1 | 4 | 1.753991 | ##### |  |
| 28 | 1 US | 2020-14 | 2 US-West    | 1 | 5 | 1.289862 | ##### |  |
| 29 | 1 US | 2020-14 | 2 US-West    | 2 | 1 | 1.955723 | ##### |  |
| 30 | 1 US | 2020-14 | 2 US-West    | 2 | 2 | 1.846154 | ##### |  |
| 31 | 1 US | 2020-14 | 2 US-West    | 2 | 3 | 2.493902 | ##### |  |
| 32 | 1 US | 2020-14 | 2 US-West    | 2 | 4 | 1.612903 | ##### |  |
| 33 | 1 US | 2020-14 | 2 US-West    | 2 | 5 | 1.230088 | ##### |  |
| 34 | 1 US | 2020-14 | 2 US-West    | 2 | 1 | 1.868709 | ##### |  |
| 35 | 1 US | 2020-14 | 2 US-West    | 3 | 2 | 2.0625   | ##### |  |
| 36 | 1 US | 2020-14 | 2 US-West    | 3 | 3 | 1.914894 | ##### |  |
| 37 | 1 US | 2020-14 | 2 US-West    | 3 | 4 | 1.938272 | ##### |  |
| 38 | 1 US | 2020-14 | 2 US-West    | 3 | 5 | 1.373333 | ##### |  |
| 39 | 1 US | 2020-14 | 3 US-Midwes  | 1 | 1 | #####    | ##### |  |
| 40 | 1 US | 2020-14 | 3 US-Midwes  | 1 | 2 | 0        | 0     |  |
| 41 | 1 US | 2020-14 | 3 US-Midwes  | 1 | 3 | 0        | 0     |  |
| 42 | 1 US | 2020-14 | 3 US-Midwes  | 1 | 4 | #####    | ##### |  |
| 43 | 1 US | 2020-14 | 3 US-Midwes  | 1 | 5 | #####    | ##### |  |
| 44 | 1 US | 2020-14 | 3 US-Midwes  | 2 | 1 | #####    | ##### |  |
| 45 | 1 US | 2020-14 | 3 US-Midwes  | 2 | 2 | 0        | 0     |  |
| 46 | 1 US | 2020-14 | 3 US-Midwes  | 2 | 3 | 0        | 0     |  |
| 47 | 1 US | 2020-14 | 3 US-Midwes  | 2 | 4 | #####    | ##### |  |
| 48 | 1 US | 2020-14 | 3 US-Midwes  | 2 | 5 | 0.025    | ##### |  |
| 49 | 1 US | 2020-14 | 3 US-Midwes  | 3 | 1 | #####    | ##### |  |
| 50 | 1 US | 2020-14 | 3 US-Midwes  | 3 | 2 | 0        | 0     |  |
| 51 | 1 US | 2020-14 | 3 US-Midwes  | 3 | 3 | 0        | 0     |  |
| 52 | 1 US | 2020-14 | 3 US-Midwes  | 3 | 4 | #####    | ##### |  |
| 53 | 1 US | 2020-14 | 3 US-Midwes  | 3 | 5 | #####    | ##### |  |
| 54 | 1 US | 2020-14 | 3 US-Northe  | 1 | 1 | #####    | ##### |  |
| 55 | 1 US | 2020-14 | 3 US-Northe  | 1 | 2 | #####    | ##### |  |
| 56 | 1 US | 2020-14 | 3 US-Northe  | 1 | 3 | #####    | ##### |  |
| 57 | 1 US | 2020-14 | 3 US-Northe  | 1 | 4 | #####    | ##### |  |
| 58 | 1 US | 2020-14 | 3 US-Northe  | 1 | 5 | #####    | ##### |  |
| 59 | 1 US | 2020-14 | 3 US-Northe  | 1 | 5 | #####    | ##### |  |
| 60 | 1 US | 2020-14 | 3 US-Northe  | 1 | 5 | #####    | ##### |  |

1  
2  
3  
4  
5  
6  
7  
8  
9  
10  
11  
12  
13  
14  
15  
16  
17  
18  
19  
20  
21  
22  
23  
24  
25  
26  
27  
28  
29  
30  
31  
32  
33  
34  
35  
36  
37  
38  
39  
40  
41  
42  
43  
44  
45  
46  
47  
48  
49  
50  
51  
52  
53  
54  
55  
56  
57  
58  
59  
60

|      |         |                |   |   |          |       |
|------|---------|----------------|---|---|----------|-------|
| 1 US | 2020-14 | 3 US-Northeast | 2 | 1 | #####    | ##### |
| 1 US | 2020-14 | 3 US-Northeast | 2 | 2 | #####    | ##### |
| 1 US | 2020-14 | 3 US-Northeast | 2 | 3 | #####    | ##### |
| 1 US | 2020-14 | 3 US-Northeast | 2 | 4 | #####    | ##### |
| 1 US | 2020-14 | 3 US-Northeast | 2 | 5 | #####    | ##### |
| 1 US | 2020-14 | 3 US-Northeast | 3 | 1 | #####    | ##### |
| 1 US | 2020-14 | 3 US-Northeast | 3 | 2 | 0        | 0     |
| 1 US | 2020-14 | 3 US-Northeast | 3 | 3 | #####    | ##### |
| 1 US | 2020-14 | 3 US-Northeast | 3 | 4 | 0        | 0     |
| 1 US | 2020-14 | 3 US-Northeast | 3 | 5 | #####    | ##### |
| 1 US | 2020-14 | 3 US-Overall   | 1 | 1 | #####    | ##### |
| 1 US | 2020-14 | 3 US-Overall   | 1 | 2 | #####    | ##### |
| 1 US | 2020-14 | 3 US-Overall   | 1 | 3 | #####    | ##### |
| 1 US | 2020-14 | 3 US-Overall   | 1 | 4 | #####    | ##### |
| 1 US | 2020-14 | 3 US-Overall   | 1 | 5 | #####    | ##### |
| 1 US | 2020-14 | 3 US-Overall   | 2 | 1 | #####    | ##### |
| 1 US | 2020-14 | 3 US-Overall   | 2 | 2 | #####    | ##### |
| 1 US | 2020-14 | 3 US-Overall   | 2 | 3 | #####    | ##### |
| 1 US | 2020-14 | 3 US-Overall   | 2 | 4 | #####    | ##### |
| 1 US | 2020-14 | 3 US-Overall   | 2 | 5 | #####    | ##### |
| 1 US | 2020-14 | 3 US-Overall   | 3 | 1 | #####    | ##### |
| 1 US | 2020-14 | 3 US-Overall   | 3 | 2 | #####    | ##### |
| 1 US | 2020-14 | 3 US-Overall   | 3 | 3 | #####    | ##### |
| 1 US | 2020-14 | 3 US-Overall   | 3 | 4 | #####    | ##### |
| 1 US | 2020-14 | 3 US-Overall   | 3 | 5 | #####    | ##### |
| 1 US | 2020-14 | 3 US-South     | 1 | 1 | #####    | ##### |
| 1 US | 2020-14 | 3 US-South     | 1 | 2 | #####    | ##### |
| 1 US | 2020-14 | 3 US-South     | 1 | 3 | 0        | 0     |
| 1 US | 2020-14 | 3 US-South     | 1 | 4 | #####    | ##### |
| 1 US | 2020-14 | 3 US-South     | 1 | 5 | 0        | 0     |
| 1 US | 2020-14 | 3 US-South     | 2 | 1 | #####    | ##### |
| 1 US | 2020-14 | 3 US-South     | 2 | 2 | #####    | ##### |
| 1 US | 2020-14 | 3 US-South     | 2 | 3 | 0        | 0     |
| 1 US | 2020-14 | 3 US-South     | 2 | 4 | #####    | ##### |
| 1 US | 2020-14 | 3 US-South     | 2 | 5 | 0        | 0     |
| 1 US | 2020-14 | 3 US-South     | 3 | 1 | #####    | ##### |
| 1 US | 2020-14 | 3 US-South     | 3 | 2 | #####    | ##### |
| 1 US | 2020-14 | 3 US-South     | 3 | 3 | 0        | 0     |
| 1 US | 2020-14 | 3 US-South     | 3 | 4 | 0        | 0     |
| 1 US | 2020-14 | 3 US-South     | 3 | 5 | 0        | 0     |
| 1 US | 2020-14 | 3 US-West      | 1 | 1 | #####    | ##### |
| 1 US | 2020-14 | 3 US-West      | 1 | 2 | #####    | ##### |
| 1 US | 2020-14 | 3 US-West      | 1 | 3 | 0        | 0     |
| 1 US | 2020-14 | 3 US-West      | 1 | 4 | #####    | ##### |
| 1 US | 2020-14 | 3 US-West      | 1 | 5 | #####    | ##### |
| 1 US | 2020-14 | 3 US-West      | 2 | 1 | #####    | ##### |
| 1 US | 2020-14 | 3 US-West      | 2 | 2 | #####    | ##### |
| 1 US | 2020-14 | 3 US-West      | 2 | 3 | 0        | 0     |
| 1 US | 2020-14 | 3 US-West      | 2 | 4 | 0        | 0     |
| 1 US | 2020-14 | 3 US-West      | 2 | 5 | #####    | ##### |
| 1 US | 2020-14 | 3 US-West      | 3 | 1 | #####    | ##### |
| 1 US | 2020-14 | 3 US-West      | 3 | 2 | 0        | 0     |
| 1 US | 2020-14 | 3 US-West      | 3 | 3 | 0        | 0     |
| 1 US | 2020-14 | 3 US-West      | 3 | 4 | #####    | ##### |
| 1 US | 2020-14 | 3 US-West      | 3 | 5 | 0.04     | ##### |
| 1 US | 2020-14 | 4 US-Midwest   | 1 | 1 | 1.428893 | ##### |

|    |      |         |              |   |   |          |          |  |
|----|------|---------|--------------|---|---|----------|----------|--|
| 1  |      |         |              |   |   |          |          |  |
| 2  |      |         |              |   |   |          |          |  |
| 3  | 1 US | 2020-14 | 4 US-Midwes  | 1 | 2 | 1.088506 | #####    |  |
| 4  | 1 US | 2020-14 | 4 US-Midwes  | 1 | 3 | 2.283864 | #####    |  |
| 5  | 1 US | 2020-14 | 4 US-Midwes  | 1 | 4 | 1.359449 | #####    |  |
| 6  | 1 US | 2020-14 | 4 US-Midwes  | 1 | 5 | #####    | #####    |  |
| 7  | 1 US | 2020-14 | 4 US-Midwes  | 2 | 1 | 1.134955 | #####    |  |
| 8  | 1 US | 2020-14 | 4 US-Midwes  | 2 | 2 | #####    | #####    |  |
| 9  | 1 US | 2020-14 | 4 US-Midwes  | 2 | 3 | 1.6625   | #####    |  |
| 10 | 1 US | 2020-14 | 4 US-Midwes  | 2 | 4 | 1.172043 | #####    |  |
| 11 | 1 US | 2020-14 | 4 US-Midwes  | 2 | 5 | #####    | #####    |  |
| 12 | 1 US | 2020-14 | 4 US-Midwes  | 3 | 1 | 1.851542 | #####    |  |
| 13 | 1 US | 2020-14 | 4 US-Midwes  | 3 | 2 | 1.642857 | 1.260141 |  |
| 14 | 1 US | 2020-14 | 4 US-Midwes  | 3 | 3 | 3.232558 | #####    |  |
| 15 | 1 US | 2020-14 | 4 US-Midwes  | 3 | 4 | 1.619048 | #####    |  |
| 16 | 1 US | 2020-14 | 4 US-Midwes  | 3 | 5 | #####    | #####    |  |
| 17 | 1 US | 2020-14 | 4 US-Northea | 1 | 1 | 1.297454 | #####    |  |
| 18 | 1 US | 2020-14 | 4 US-Northea | 1 | 2 | #####    | #####    |  |
| 19 | 1 US | 2020-14 | 4 US-Northea | 1 | 3 | 1.998848 | #####    |  |
| 20 | 1 US | 2020-14 | 4 US-Northea | 1 | 4 | 1.486879 | #####    |  |
| 21 | 1 US | 2020-14 | 4 US-Northea | 1 | 5 | #####    | #####    |  |
| 22 | 1 US | 2020-14 | 4 US-Northea | 2 | 1 | 1.01686  | #####    |  |
| 23 | 1 US | 2020-14 | 4 US-Northea | 2 | 2 | #####    | #####    |  |
| 24 | 1 US | 2020-14 | 4 US-Northea | 2 | 3 | 1.325    | #####    |  |
| 25 | 1 US | 2020-14 | 4 US-Northea | 2 | 4 | 1.064935 | #####    |  |
| 26 | 1 US | 2020-14 | 4 US-Northea | 2 | 5 | #####    | #####    |  |
| 27 | 1 US | 2020-14 | 4 US-Northea | 3 | 1 | 1.761455 | #####    |  |
| 28 | 1 US | 2020-14 | 4 US-Northea | 3 | 2 | #####    | #####    |  |
| 29 | 1 US | 2020-14 | 4 US-Northea | 3 | 3 | 3.185185 | 1.165433 |  |
| 30 | 1 US | 2020-14 | 4 US-Northea | 3 | 4 | 2.25     | #####    |  |
| 31 | 1 US | 2020-14 | 4 US-Northea | 3 | 5 | 0        | 0        |  |
| 32 | 1 US | 2020-14 | 4 US-Overall | 1 | 1 | 1.296318 | #####    |  |
| 33 | 1 US | 2020-14 | 4 US-Overall | 1 | 2 | #####    | #####    |  |
| 34 | 1 US | 2020-14 | 4 US-Overall | 1 | 3 | 1.990518 | #####    |  |
| 35 | 1 US | 2020-14 | 4 US-Overall | 1 | 4 | 1.3152   | #####    |  |
| 36 | 1 US | 2020-14 | 4 US-Overall | 1 | 5 | #####    | #####    |  |
| 37 | 1 US | 2020-14 | 4 US-Overall | 2 | 1 | 1.017365 | #####    |  |
| 38 | 1 US | 2020-14 | 4 US-Overall | 2 | 2 | #####    | #####    |  |
| 39 | 1 US | 2020-14 | 4 US-Overall | 2 | 3 | 1.367905 | #####    |  |
| 40 | 1 US | 2020-14 | 4 US-Overall | 2 | 4 | 1.081984 | #####    |  |
| 41 | 1 US | 2020-14 | 4 US-Overall | 2 | 5 | #####    | #####    |  |
| 42 | 1 US | 2020-14 | 4 US-Overall | 3 | 1 | 1.715006 | #####    |  |
| 43 | 1 US | 2020-14 | 4 US-Overall | 3 | 2 | #####    | #####    |  |
| 44 | 1 US | 2020-14 | 4 US-Overall | 3 | 3 | 3.006956 | #####    |  |
| 45 | 1 US | 2020-14 | 4 US-Overall | 3 | 4 | 1.657202 | #####    |  |
| 46 | 1 US | 2020-14 | 4 US-Overall | 3 | 5 | #####    | #####    |  |
| 47 | 1 US | 2020-14 | 4 US-South   | 1 | 1 | 1.361939 | #####    |  |
| 48 | 1 US | 2020-14 | 4 US-South   | 1 | 2 | #####    | #####    |  |
| 49 | 1 US | 2020-14 | 4 US-South   | 1 | 3 | 2.351985 | #####    |  |
| 50 | 1 US | 2020-14 | 4 US-South   | 1 | 4 | 1.213187 | #####    |  |
| 51 | 1 US | 2020-14 | 4 US-South   | 1 | 5 | #####    | #####    |  |
| 52 | 1 US | 2020-14 | 4 US-South   | 2 | 1 | 1.062012 | #####    |  |
| 53 | 1 US | 2020-14 | 4 US-South   | 2 | 2 | #####    | #####    |  |
| 54 | 1 US | 2020-14 | 4 US-South   | 2 | 3 | 1.544828 | #####    |  |
| 55 | 1 US | 2020-14 | 4 US-South   | 2 | 4 | #####    | #####    |  |
| 56 | 1 US | 2020-14 | 4 US-South   | 2 | 5 | #####    | #####    |  |
| 57 | 1 US | 2020-14 | 4 US-South   | 3 | 1 | 1.839493 | #####    |  |
| 58 | 1 US | 2020-14 | 4 US-South   | 3 | 2 | #####    | #####    |  |
| 59 | 1 US | 2020-14 | 4 US-South   | 3 | 3 | #####    | #####    |  |
| 60 | 1 US | 2020-14 | 4 US-South   | 3 | 4 | #####    | #####    |  |

|    |      |         |              |   |   |          |          |
|----|------|---------|--------------|---|---|----------|----------|
| 1  |      |         |              |   |   |          |          |
| 2  |      |         |              |   |   |          |          |
| 3  | 1 US | 2020-14 | 4 US-South   | 3 | 3 | 3.846154 | 1.352996 |
| 4  | 1 US | 2020-14 | 4 US-South   | 3 | 4 | 1.554217 | #####    |
| 5  | 1 US | 2020-14 | 4 US-South   | 3 | 5 | #####    | #####    |
| 6  | 1 US | 2020-14 | 4 US-West    | 1 | 1 | 1.060628 | #####    |
| 7  | 1 US | 2020-14 | 4 US-West    | 1 | 2 | 1.013776 | #####    |
| 8  | 1 US | 2020-14 | 4 US-West    | 1 | 3 | 1.22367  | #####    |
| 9  | 1 US | 2020-14 | 4 US-West    | 1 | 4 | 1.333592 | #####    |
| 10 | 1 US | 2020-14 | 4 US-West    | 1 | 5 | #####    | #####    |
| 11 | 1 US | 2020-14 | 4 US-West    | 2 | 1 | #####    | #####    |
| 12 | 1 US | 2020-14 | 4 US-West    | 2 | 2 | #####    | #####    |
| 13 | 1 US | 2020-14 | 4 US-West    | 2 | 3 | #####    | #####    |
| 14 | 1 US | 2020-14 | 4 US-West    | 2 | 4 | 1.213333 | #####    |
| 15 | 1 US | 2020-14 | 4 US-West    | 2 | 5 | 0.1875   | #####    |
| 16 | 1 US | 2020-14 | 4 US-West    | 3 | 1 | 1.374103 | #####    |
| 17 | 1 US | 2020-14 | 4 US-West    | 3 | 2 | 1.5      | 1.02896  |
| 18 | 1 US | 2020-14 | 4 US-West    | 3 | 3 | 1.711111 | #####    |
| 19 | 1 US | 2020-14 | 4 US-West    | 3 | 4 | 1.4875   | #####    |
| 20 | 1 US | 2020-14 | 4 US-West    | 3 | 5 | #####    | #####    |
| 21 | 1 US | 2020-14 | 5 US-Midwes  | 1 | 1 | 1.077604 | #####    |
| 22 | 1 US | 2020-14 | 5 US-Midwes  | 1 | 2 | #####    | #####    |
| 23 | 1 US | 2020-14 | 5 US-Midwes  | 1 | 3 | 1.106731 | #####    |
| 24 | 1 US | 2020-14 | 5 US-Midwes  | 1 | 4 | 1.264498 | #####    |
| 25 | 1 US | 2020-14 | 5 US-Midwes  | 1 | 5 | #####    | #####    |
| 26 | 1 US | 2020-14 | 5 US-Midwes  | 2 | 1 | 1.036747 | #####    |
| 27 | 1 US | 2020-14 | 5 US-Midwes  | 2 | 2 | 1.089286 | #####    |
| 28 | 1 US | 2020-14 | 5 US-Midwes  | 2 | 3 | 1.092025 | #####    |
| 29 | 1 US | 2020-14 | 5 US-Midwes  | 2 | 4 | 1.145833 | #####    |
| 30 | 1 US | 2020-14 | 5 US-Midwes  | 2 | 5 | #####    | #####    |
| 31 | 1 US | 2020-14 | 5 US-Midwes  | 3 | 1 | 1.135478 | #####    |
| 32 | 1 US | 2020-14 | 5 US-Midwes  | 3 | 2 | #####    | #####    |
| 33 | 1 US | 2020-14 | 5 US-Midwes  | 3 | 3 | 1.12766  | #####    |
| 34 | 1 US | 2020-14 | 5 US-Midwes  | 3 | 4 | 1.430233 | #####    |
| 35 | 1 US | 2020-14 | 5 US-Midwes  | 3 | 5 | 1        | #####    |
| 36 | 1 US | 2020-14 | 5 US-Northea | 1 | 1 | 1.284117 | #####    |
| 37 | 1 US | 2020-14 | 5 US-Northea | 1 | 2 | 1.614675 | #####    |
| 38 | 1 US | 2020-14 | 5 US-Northea | 1 | 3 | 1.038952 | #####    |
| 39 | 1 US | 2020-14 | 5 US-Northea | 1 | 4 | 1.249532 | #####    |
| 40 | 1 US | 2020-14 | 5 US-Northea | 1 | 5 | 1.519621 | #####    |
| 41 | 1 US | 2020-14 | 5 US-Northea | 2 | 1 | 1.044578 | #####    |
| 42 | 1 US | 2020-14 | 5 US-Northea | 2 | 2 | 1.259259 | #####    |
| 43 | 1 US | 2020-14 | 5 US-Northea | 2 | 3 | 0.96     | #####    |
| 44 | 1 US | 2020-14 | 5 US-Northea | 2 | 4 | 1.018405 | #####    |
| 45 | 1 US | 2020-14 | 5 US-Northea | 2 | 5 | 1.117647 | #####    |
| 46 | 1 US | 2020-14 | 5 US-Northea | 3 | 1 | 1.683875 | #####    |
| 47 | 1 US | 2020-14 | 5 US-Northea | 3 | 2 | 1.916667 | 1.591963 |
| 48 | 1 US | 2020-14 | 5 US-Northea | 3 | 3 | 1.178571 | #####    |
| 49 | 1 US | 2020-14 | 5 US-Northea | 3 | 4 | 1.684211 | #####    |
| 50 | 1 US | 2020-14 | 5 US-Northea | 3 | 5 | 2.367347 | #####    |
| 51 | 1 US | 2020-14 | 5 US-Overall | 1 | 1 | 1.12604  | #####    |
| 52 | 1 US | 2020-14 | 5 US-Overall | 1 | 2 | 1.057008 | #####    |
| 53 | 1 US | 2020-14 | 5 US-Overall | 1 | 3 | #####    | #####    |
| 54 | 1 US | 2020-14 | 5 US-Overall | 1 | 4 | 1.412146 | #####    |
| 55 | 1 US | 2020-14 | 5 US-Overall | 1 | 5 | 1.111503 | #####    |
| 56 | 1 US | 2020-14 | 5 US-Overall | 2 | 1 | 1.030492 | #####    |
| 57 | 1 US | 2020-14 | 5 US-Overall | 2 | 2 | 1.063715 | #####    |
| 58 | 1 US | 2020-14 | 5 US-Overall | 2 | 3 | #####    | #####    |
| 59 | 1 US | 2020-14 | 5 US-Overall | 2 | 3 | #####    | #####    |
| 60 | 1 US | 2020-14 | 5 US-Overall | 2 | 3 | #####    | #####    |

|    |      |         |              |   |   |          |          |  |
|----|------|---------|--------------|---|---|----------|----------|--|
| 1  |      |         |              |   |   |          |          |  |
| 2  |      |         |              |   |   |          |          |  |
| 3  | 1 US | 2020-14 | 5 US-Overall | 2 | 4 | 1.222016 | #####    |  |
| 4  | 1 US | 2020-14 | 5 US-Overall | 2 | 5 | #####    | #####    |  |
| 5  | 1 US | 2020-14 | 5 US-Overall | 3 | 1 | 1.26886  | #####    |  |
| 6  | 1 US | 2020-14 | 5 US-Overall | 3 | 2 | 1.04933  | #####    |  |
| 7  | 1 US | 2020-14 | 5 US-Overall | 3 | 3 | #####    | #####    |  |
| 8  | 1 US | 2020-14 | 5 US-Overall | 3 | 4 | 1.697901 | #####    |  |
| 9  | 1 US | 2020-14 | 5 US-Overall | 3 | 5 | 1.44736  | #####    |  |
| 10 | 1 US | 2020-14 | 5 US-South   | 1 | 1 | #####    | #####    |  |
| 11 | 1 US | 2020-14 | 5 US-South   | 1 | 2 | #####    | #####    |  |
| 12 | 1 US | 2020-14 | 5 US-South   | 1 | 3 | #####    | #####    |  |
| 13 | 1 US | 2020-14 | 5 US-South   | 1 | 4 | 1.384216 | #####    |  |
| 14 | 1 US | 2020-14 | 5 US-South   | 1 | 5 | 1.146777 | #####    |  |
| 15 | 1 US | 2020-14 | 5 US-South   | 2 | 1 | 1.022092 | #####    |  |
| 16 | 1 US | 2020-14 | 5 US-South   | 2 | 2 | 1.02381  | #####    |  |
| 17 | 1 US | 2020-14 | 5 US-South   | 2 | 3 | #####    | #####    |  |
| 18 | 1 US | 2020-14 | 5 US-South   | 2 | 4 | 1.276596 | #####    |  |
| 19 | 1 US | 2020-14 | 5 US-South   | 2 | 5 | 1        | #####    |  |
| 20 | 1 US | 2020-14 | 5 US-South   | 3 | 1 | #####    | #####    |  |
| 21 | 1 US | 2020-14 | 5 US-South   | 3 | 2 | #####    | #####    |  |
| 22 | 1 US | 2020-14 | 5 US-South   | 3 | 3 | #####    | #####    |  |
| 23 | 1 US | 2020-14 | 5 US-South   | 3 | 3 | #####    | #####    |  |
| 24 | 1 US | 2020-14 | 5 US-South   | 3 | 4 | 1.54878  | #####    |  |
| 25 | 1 US | 2020-14 | 5 US-South   | 3 | 5 | 1.38806  | #####    |  |
| 26 | 1 US | 2020-14 | 5 US-West    | 1 | 1 | 1.299329 | #####    |  |
| 27 | 1 US | 2020-14 | 5 US-West    | 1 | 2 | 1.284242 | #####    |  |
| 28 | 1 US | 2020-14 | 5 US-West    | 1 | 3 | 1.091139 | #####    |  |
| 29 | 1 US | 2020-14 | 5 US-West    | 1 | 4 | 1.745575 | #####    |  |
| 30 | 1 US | 2020-14 | 5 US-West    | 1 | 5 | 1.007909 | #####    |  |
| 31 | 1 US | 2020-14 | 5 US-West    | 2 | 1 | 1.029386 | #####    |  |
| 32 | 1 US | 2020-14 | 5 US-West    | 2 | 2 | 1        | #####    |  |
| 33 | 1 US | 2020-14 | 5 US-West    | 2 | 3 | #####    | #####    |  |
| 34 | 1 US | 2020-14 | 5 US-West    | 2 | 4 | 1.380645 | #####    |  |
| 35 | 1 US | 2020-14 | 5 US-West    | 2 | 5 | #####    | #####    |  |
| 36 | 1 US | 2020-14 | 5 US-West    | 3 | 1 | 1.663037 | #####    |  |
| 37 | 1 US | 2020-14 | 5 US-West    | 3 | 2 | 1.6      | #####    |  |
| 38 | 1 US | 2020-14 | 5 US-West    | 3 | 3 | 1.347826 | #####    |  |
| 39 | 1 US | 2020-14 | 5 US-West    | 3 | 4 | 2.222222 | #####    |  |
| 40 | 1 US | 2020-14 | 5 US-West    | 3 | 5 | 1.432432 | #####    |  |
| 41 | 1 US | 2020-15 | 1 US-Midwes  | 1 | 1 | 5.055356 | #####    |  |
| 42 | 1 US | 2020-15 | 1 US-Midwes  | 1 | 2 | 5.016904 | #####    |  |
| 43 | 1 US | 2020-15 | 1 US-Midwes  | 1 | 3 | 6.048629 | #####    |  |
| 44 | 1 US | 2020-15 | 1 US-Midwes  | 1 | 4 | 4.8668   | #####    |  |
| 45 | 1 US | 2020-15 | 1 US-Midwes  | 1 | 5 | 3.646982 | #####    |  |
| 46 | 1 US | 2020-15 | 1 US-Midwes  | 2 | 1 | 4.461331 | #####    |  |
| 47 | 1 US | 2020-15 | 1 US-Midwes  | 2 | 2 | 5.770492 | #####    |  |
| 48 | 1 US | 2020-15 | 1 US-Midwes  | 2 | 3 | 5.463576 | #####    |  |
| 49 | 1 US | 2020-15 | 1 US-Midwes  | 2 | 4 | 3.169399 | #####    |  |
| 50 | 1 US | 2020-15 | 1 US-Midwes  | 2 | 5 | 3.638655 | #####    |  |
| 51 | 1 US | 2020-15 | 1 US-Midwes  | 3 | 1 | 6.089044 | #####    |  |
| 52 | 1 US | 2020-15 | 1 US-Midwes  | 3 | 2 | 3.3      | #####    |  |
| 53 | 1 US | 2020-15 | 1 US-Midwes  | 3 | 3 | 7.055556 | 1.486596 |  |
| 54 | 1 US | 2020-15 | 1 US-Midwes  | 3 | 4 | 7.152941 | 1.007762 |  |
| 55 | 1 US | 2020-15 | 1 US-Midwes  | 3 | 5 | 3.666667 | #####    |  |
| 56 | 1 US | 2020-15 | 1 US-Northe  | 1 | 1 | 5.308329 | #####    |  |
| 57 | 1 US | 2020-15 | 1 US-Northe  | 1 | 2 | 6.160502 | #####    |  |
| 58 | 1 US | 2020-15 | 1 US-Northe  | 1 | 3 | 5.249375 | #####    |  |
| 59 | 1 US | 2020-15 | 1 US-Northe  | 1 | 4 | 6.365573 | #####    |  |
| 60 | 1 US | 2020-15 | 1 US-Northe  | 1 |   |          |          |  |

|    |      |         |                |   |   |          |          |  |
|----|------|---------|----------------|---|---|----------|----------|--|
| 1  |      |         |                |   |   |          |          |  |
| 2  |      |         |                |   |   |          |          |  |
| 3  | 1 US | 2020-15 | 1 US-Northeast | 1 | 5 | 3.10592  | #####    |  |
| 4  | 1 US | 2020-15 | 1 US-Northeast | 2 | 1 | 5.073594 | #####    |  |
| 5  | 1 US | 2020-15 | 1 US-Northeast | 2 | 2 | 5.647059 | 1.038974 |  |
| 6  | 1 US | 2020-15 | 1 US-Northeast | 2 | 3 | 5.526667 | #####    |  |
| 7  | 1 US | 2020-15 | 1 US-Northeast | 2 | 4 | 5.886792 | #####    |  |
| 8  | 1 US | 2020-15 | 1 US-Northeast | 2 | 5 | 2.509434 | #####    |  |
| 9  | 1 US | 2020-15 | 1 US-Northeast | 3 | 1 | 5.646561 | #####    |  |
| 10 | 1 US | 2020-15 | 1 US-Northeast | 3 | 2 | 6.6      | 1.577121 |  |
| 11 | 1 US | 2020-15 | 1 US-Northeast | 3 | 3 | 4.815789 | 1.030636 |  |
| 12 | 1 US | 2020-15 | 1 US-Northeast | 3 | 4 | 7.2      | 1.16738  |  |
| 13 | 1 US | 2020-15 | 1 US-Northeast | 3 | 5 | 3.96     | #####    |  |
| 14 | 1 US | 2020-15 | 1 US-Overall   | 1 | 1 | 4.918136 | #####    |  |
| 15 | 1 US | 2020-15 | 1 US-Overall   | 1 | 2 | 4.871224 | #####    |  |
| 16 | 1 US | 2020-15 | 1 US-Overall   | 1 | 3 | 5.452972 | #####    |  |
| 17 | 1 US | 2020-15 | 1 US-Overall   | 1 | 4 | 5.273932 | #####    |  |
| 18 | 1 US | 2020-15 | 1 US-Overall   | 1 | 5 | 3.357011 | #####    |  |
| 19 | 1 US | 2020-15 | 1 US-Overall   | 2 | 1 | 4.499826 | #####    |  |
| 20 | 1 US | 2020-15 | 1 US-Overall   | 2 | 2 | 5.336167 | 0.411978 |  |
| 21 | 1 US | 2020-15 | 1 US-Overall   | 2 | 3 | 4.935759 | #####    |  |
| 22 | 1 US | 2020-15 | 1 US-Overall   | 2 | 4 | 4.562345 | #####    |  |
| 23 | 1 US | 2020-15 | 1 US-Overall   | 2 | 5 | 3.035036 | #####    |  |
| 24 | 1 US | 2020-15 | 1 US-Overall   | 3 | 1 | 5.604612 | #####    |  |
| 25 | 1 US | 2020-15 | 1 US-Overall   | 3 | 2 | 4.309882 | #####    |  |
| 26 | 1 US | 2020-15 | 1 US-Overall   | 3 | 3 | 6.461733 | #####    |  |
| 27 | 1 US | 2020-15 | 1 US-Overall   | 3 | 4 | 6.281434 | #####    |  |
| 28 | 1 US | 2020-15 | 1 US-Overall   | 3 | 5 | 4.001426 | #####    |  |
| 29 | 1 US | 2020-15 | 1 US-South     | 1 | 1 | 4.694088 | #####    |  |
| 30 | 1 US | 2020-15 | 1 US-South     | 1 | 2 | 3.471851 | #####    |  |
| 31 | 1 US | 2020-15 | 1 US-South     | 1 | 3 | 5.786072 | #####    |  |
| 32 | 1 US | 2020-15 | 1 US-South     | 1 | 4 | 4.807154 | #####    |  |
| 33 | 1 US | 2020-15 | 1 US-South     | 1 | 5 | 3.222859 | #####    |  |
| 34 | 1 US | 2020-15 | 1 US-South     | 2 | 1 | 4.269188 | #####    |  |
| 35 | 1 US | 2020-15 | 1 US-South     | 2 | 2 | 4.24     | #####    |  |
| 36 | 1 US | 2020-15 | 1 US-South     | 2 | 3 | 4.748299 | #####    |  |
| 37 | 1 US | 2020-15 | 1 US-South     | 2 | 4 | 4.5      | #####    |  |
| 38 | 1 US | 2020-15 | 1 US-South     | 2 | 5 | 2.946154 | #####    |  |
| 39 | 1 US | 2020-15 | 1 US-South     | 3 | 1 | 5.451763 | #####    |  |
| 40 | 1 US | 2020-15 | 1 US-South     | 3 | 2 | 2.666667 | #####    |  |
| 41 | 1 US | 2020-15 | 1 US-South     | 3 | 3 | 8.764706 | 2.092299 |  |
| 42 | 1 US | 2020-15 | 1 US-South     | 3 | 4 | 5.189189 | #####    |  |
| 43 | 1 US | 2020-15 | 1 US-South     | 3 | 5 | 3.818182 | #####    |  |
| 44 | 1 US | 2020-15 | 1 US-West      | 1 | 1 | 4.798976 | #####    |  |
| 45 | 1 US | 2020-15 | 1 US-West      | 1 | 2 | 5.333965 | #####    |  |
| 46 | 1 US | 2020-15 | 1 US-West      | 1 | 3 | 4.664452 | #####    |  |
| 47 | 1 US | 2020-15 | 1 US-West      | 1 | 4 | 5.494455 | #####    |  |
| 48 | 1 US | 2020-15 | 1 US-West      | 1 | 5 | 3.548121 | #####    |  |
| 49 | 1 US | 2020-15 | 1 US-West      | 2 | 1 | 4.4168   | #####    |  |
| 50 | 1 US | 2020-15 | 1 US-West      | 2 | 2 | 5.853659 | #####    |  |
| 51 | 1 US | 2020-15 | 1 US-West      | 2 | 3 | 4.355072 | #####    |  |
| 52 | 1 US | 2020-15 | 1 US-West      | 2 | 4 | 4.763158 | #####    |  |
| 53 | 1 US | 2020-15 | 1 US-West      | 2 | 5 | 3.081761 | #####    |  |
| 54 | 1 US | 2020-15 | 1 US-West      | 3 | 1 | 5.39053  | #####    |  |
| 55 | 1 US | 2020-15 | 1 US-West      | 3 | 2 | 4.75     | 1.069871 |  |
| 56 | 1 US | 2020-15 | 1 US-West      | 3 | 3 | 5.135135 | #####    |  |
| 57 | 1 US | 2020-15 | 1 US-West      | 3 | 4 | 6.626866 | #####    |  |
| 58 | 1 US | 2020-15 | 1 US-West      | 3 | 5 | 4.558824 | #####    |  |
| 59 | 1 US | 2020-15 | 1 US-West      | 3 |   |          |          |  |
| 60 | 1 US | 2020-15 | 1 US-West      | 3 |   |          |          |  |



|    |      |         |              |   |   |          |       |
|----|------|---------|--------------|---|---|----------|-------|
| 1  |      |         |              |   |   |          |       |
| 2  |      |         |              |   |   |          |       |
| 3  | 1 US | 2020-15 | 2 US-Midwes  | 1 | 1 | 1.98484  | ##### |
| 4  | 1 US | 2020-15 | 2 US-Midwes  | 1 | 2 | 2.238461 | ##### |
| 5  | 1 US | 2020-15 | 2 US-Midwes  | 1 | 3 | 2.272939 | ##### |
| 6  | 1 US | 2020-15 | 2 US-Midwes  | 1 | 4 | 1.783005 | ##### |
| 7  | 1 US | 2020-15 | 2 US-Midwes  | 1 | 5 | 1.577469 | ##### |
| 8  | 1 US | 2020-15 | 2 US-Midwes  | 2 | 1 | 2.047967 | ##### |
| 9  | 1 US | 2020-15 | 2 US-Midwes  | 2 | 2 | 2.343284 | ##### |
| 10 | 1 US | 2020-15 | 2 US-Midwes  | 2 | 3 | 2.575949 | ##### |
| 11 | 1 US | 2020-15 | 2 US-Midwes  | 2 | 4 | 1.68254  | ##### |
| 12 | 1 US | 2020-15 | 2 US-Midwes  | 2 | 5 | 1.455285 | ##### |
| 13 | 1 US | 2020-15 | 2 US-Midwes  | 3 | 1 | 1.875392 | ##### |
| 14 | 1 US | 2020-15 | 2 US-Midwes  | 3 | 2 | 2        | ##### |
| 15 | 1 US | 2020-15 | 2 US-Midwes  | 3 | 3 | 1.769231 | ##### |
| 16 | 1 US | 2020-15 | 2 US-Midwes  | 3 | 4 | 1.91954  | ##### |
| 17 | 1 US | 2020-15 | 2 US-Midwes  | 3 | 5 | 1.869565 | ##### |
| 18 | 1 US | 2020-15 | 2 US-Northea | 1 | 1 | 2.187132 | ##### |
| 19 | 1 US | 2020-15 | 2 US-Northea | 1 | 2 | 2.757584 | ##### |
| 20 | 1 US | 2020-15 | 2 US-Northea | 1 | 3 | 2.166025 | ##### |
| 21 | 1 US | 2020-15 | 2 US-Northea | 1 | 4 | 2.223328 | ##### |
| 22 | 1 US | 2020-15 | 2 US-Northea | 1 | 5 | 1.680402 | ##### |
| 23 | 1 US | 2020-15 | 2 US-Northea | 2 | 1 | 2.104002 | ##### |
| 24 | 1 US | 2020-15 | 2 US-Northea | 2 | 2 | 2.837838 | ##### |
| 25 | 1 US | 2020-15 | 2 US-Northea | 2 | 3 | 2.385621 | ##### |
| 26 | 1 US | 2020-15 | 2 US-Northea | 2 | 4 | 1.953216 | ##### |
| 27 | 1 US | 2020-15 | 2 US-Northea | 2 | 5 | 1.330189 | ##### |
| 28 | 1 US | 2020-15 | 2 US-Northea | 3 | 1 | 2.309138 | ##### |
| 29 | 1 US | 2020-15 | 2 US-Northea | 3 | 2 | 2.6875   | ##### |
| 30 | 1 US | 2020-15 | 2 US-Northea | 3 | 3 | 1.815789 | ##### |
| 31 | 1 US | 2020-15 | 2 US-Northea | 3 | 4 | 2.721311 | ##### |
| 32 | 1 US | 2020-15 | 2 US-Northea | 3 | 5 | 2.168831 | ##### |
| 33 | 1 US | 2020-15 | 2 US-Overall | 1 | 1 | 2.163189 | ##### |
| 34 | 1 US | 2020-15 | 2 US-Overall | 1 | 2 | 2.530443 | ##### |
| 35 | 1 US | 2020-15 | 2 US-Overall | 1 | 3 | 2.441484 | ##### |
| 36 | 1 US | 2020-15 | 2 US-Overall | 1 | 4 | 1.987893 | ##### |
| 37 | 1 US | 2020-15 | 2 US-Overall | 1 | 5 | 1.603221 | ##### |
| 38 | 1 US | 2020-15 | 2 US-Overall | 2 | 1 | 2.196488 | ##### |
| 39 | 1 US | 2020-15 | 2 US-Overall | 2 | 2 | 2.649051 | ##### |
| 40 | 1 US | 2020-15 | 2 US-Overall | 2 | 3 | 2.622255 | ##### |
| 41 | 1 US | 2020-15 | 2 US-Overall | 2 | 4 | 1.928344 | ##### |
| 42 | 1 US | 2020-15 | 2 US-Overall | 2 | 5 | 1.468497 | ##### |
| 43 | 1 US | 2020-15 | 2 US-Overall | 3 | 1 | 2.109623 | ##### |
| 44 | 1 US | 2020-15 | 2 US-Overall | 3 | 2 | 2.393884 | ##### |
| 45 | 1 US | 2020-15 | 2 US-Overall | 3 | 3 | 2.098098 | ##### |
| 46 | 1 US | 2020-15 | 2 US-Overall | 3 | 4 | 2.072647 | ##### |
| 47 | 1 US | 2020-15 | 2 US-Overall | 3 | 5 | 1.86855  | ##### |
| 48 | 1 US | 2020-15 | 2 US-South   | 1 | 1 | 2.082969 | ##### |
| 49 | 1 US | 2020-15 | 2 US-South   | 1 | 2 | 2.450475 | ##### |
| 50 | 1 US | 2020-15 | 2 US-South   | 1 | 3 | 2.452376 | ##### |
| 51 | 1 US | 2020-15 | 2 US-South   | 1 | 4 | 1.817867 | ##### |
| 52 | 1 US | 2020-15 | 2 US-South   | 1 | 5 | 1.539324 | ##### |
| 53 | 1 US | 2020-15 | 2 US-South   | 2 | 1 | 2.203752 | ##### |
| 54 | 1 US | 2020-15 | 2 US-South   | 2 | 2 | 2.807692 | ##### |
| 55 | 1 US | 2020-15 | 2 US-South   | 2 | 3 | 2.6      | ##### |
| 56 | 1 US | 2020-15 | 2 US-South   | 2 | 4 | 1.939189 | ##### |
| 57 | 1 US | 2020-15 | 2 US-South   | 2 | 5 | 1.410448 | ##### |
| 58 | 1 US | 2020-15 | 2 US-South   | 3 | 1 | 1.87204  | ##### |
| 59 | 1 US | 2020-15 | 2 US-South   | 3 |   |          |       |
| 60 | 1 US | 2020-15 | 2 US-South   | 3 |   |          |       |

|    |      |         |              |   |   |          |       |  |
|----|------|---------|--------------|---|---|----------|-------|--|
| 1  |      |         |              |   |   |          |       |  |
| 2  |      |         |              |   |   |          |       |  |
| 3  | 1 US | 2020-15 | 2 US-South   | 3 | 2 | 2.1      | ##### |  |
| 4  | 1 US | 2020-15 | 2 US-South   | 3 | 3 | 2.052632 | ##### |  |
| 5  | 1 US | 2020-15 | 2 US-South   | 3 | 4 | 1.662338 | ##### |  |
| 6  | 1 US | 2020-15 | 2 US-South   | 3 | 5 | 1.810345 | ##### |  |
| 7  | 1 US | 2020-15 | 2 US-West    | 1 | 1 | 2.411853 | ##### |  |
| 8  | 1 US | 2020-15 | 2 US-West    | 1 | 2 | 2.690917 | ##### |  |
| 9  | 1 US | 2020-15 | 2 US-West    | 1 | 3 | 2.768845 | ##### |  |
| 10 | 1 US | 2020-15 | 2 US-West    | 1 | 4 | 2.268081 | ##### |  |
| 11 | 1 US | 2020-15 | 2 US-West    | 1 | 5 | 1.651285 | ##### |  |
| 12 | 1 US | 2020-15 | 2 US-West    | 2 | 1 | 2.396056 | ##### |  |
| 13 | 1 US | 2020-15 | 2 US-West    | 2 | 2 | 2.697674 | ##### |  |
| 14 | 1 US | 2020-15 | 2 US-West    | 2 | 3 | 2.892617 | ##### |  |
| 15 | 1 US | 2020-15 | 2 US-West    | 2 | 4 | 2.128205 | ##### |  |
| 16 | 1 US | 2020-15 | 2 US-West    | 2 | 5 | 1.66875  | ##### |  |
| 17 | 1 US | 2020-15 | 2 US-West    | 3 | 1 | 2.434745 | ##### |  |
| 18 | 1 US | 2020-15 | 2 US-West    | 3 | 2 | 2.684211 | ##### |  |
| 19 | 1 US | 2020-15 | 2 US-West    | 3 | 3 | 2.585366 | ##### |  |
| 20 | 1 US | 2020-15 | 2 US-West    | 3 | 4 | 2.466667 | ##### |  |
| 21 | 1 US | 2020-15 | 2 US-West    | 3 | 5 | 1.614286 | ##### |  |
| 22 | 1 US | 2020-15 | 3 US-Midwes  | 1 | 1 | #####    | ##### |  |
| 23 | 1 US | 2020-15 | 3 US-Midwes  | 1 | 2 | #####    | ##### |  |
| 24 | 1 US | 2020-15 | 3 US-Midwes  | 1 | 3 | 0        | 0     |  |
| 25 | 1 US | 2020-15 | 3 US-Midwes  | 1 | 4 | #####    | ##### |  |
| 26 | 1 US | 2020-15 | 3 US-Midwes  | 1 | 5 | #####    | ##### |  |
| 27 | 1 US | 2020-15 | 3 US-Midwes  | 2 | 1 | #####    | ##### |  |
| 28 | 1 US | 2020-15 | 3 US-Midwes  | 2 | 2 | #####    | ##### |  |
| 29 | 1 US | 2020-15 | 3 US-Midwes  | 2 | 3 | 0        | 0     |  |
| 30 | 1 US | 2020-15 | 3 US-Midwes  | 2 | 4 | #####    | ##### |  |
| 31 | 1 US | 2020-15 | 3 US-Midwes  | 2 | 5 | #####    | ##### |  |
| 32 | 1 US | 2020-15 | 3 US-Midwes  | 3 | 1 | #####    | ##### |  |
| 33 | 1 US | 2020-15 | 3 US-Midwes  | 3 | 2 | 0        | 0     |  |
| 34 | 1 US | 2020-15 | 3 US-Midwes  | 3 | 3 | 0        | 0     |  |
| 35 | 1 US | 2020-15 | 3 US-Midwes  | 3 | 4 | #####    | ##### |  |
| 36 | 1 US | 2020-15 | 3 US-Midwes  | 3 | 5 | 0        | 0     |  |
| 37 | 1 US | 2020-15 | 3 US-Northea | 1 | 1 | #####    | ##### |  |
| 38 | 1 US | 2020-15 | 3 US-Northea | 1 | 2 | #####    | ##### |  |
| 39 | 1 US | 2020-15 | 3 US-Northea | 1 | 3 | #####    | ##### |  |
| 40 | 1 US | 2020-15 | 3 US-Northea | 1 | 4 | 0        | 0     |  |
| 41 | 1 US | 2020-15 | 3 US-Northea | 1 | 5 | #####    | ##### |  |
| 42 | 1 US | 2020-15 | 3 US-Northea | 2 | 1 | #####    | ##### |  |
| 43 | 1 US | 2020-15 | 3 US-Northea | 2 | 2 | 0        | 0     |  |
| 44 | 1 US | 2020-15 | 3 US-Northea | 2 | 3 | #####    | ##### |  |
| 45 | 1 US | 2020-15 | 3 US-Northea | 2 | 4 | 0        | 0     |  |
| 46 | 1 US | 2020-15 | 3 US-Northea | 2 | 5 | 0        | 0     |  |
| 47 | 1 US | 2020-15 | 3 US-Northea | 3 | 1 | #####    | ##### |  |
| 48 | 1 US | 2020-15 | 3 US-Northea | 3 | 2 | 0.3125   | ##### |  |
| 49 | 1 US | 2020-15 | 3 US-Northea | 3 | 3 | 0        | 0     |  |
| 50 | 1 US | 2020-15 | 3 US-Northea | 3 | 4 | 0        | 0     |  |
| 51 | 1 US | 2020-15 | 3 US-Northea | 3 | 5 | #####    | ##### |  |
| 52 | 1 US | 2020-15 | 3 US-Overall | 1 | 1 | #####    | ##### |  |
| 53 | 1 US | 2020-15 | 3 US-Overall | 1 | 2 | #####    | ##### |  |
| 54 | 1 US | 2020-15 | 3 US-Overall | 1 | 3 | #####    | ##### |  |
| 55 | 1 US | 2020-15 | 3 US-Overall | 1 | 4 | #####    | ##### |  |
| 56 | 1 US | 2020-15 | 3 US-Overall | 1 | 5 | #####    | ##### |  |
| 57 | 1 US | 2020-15 | 3 US-Overall | 2 | 1 | #####    | ##### |  |
| 58 | 1 US | 2020-15 | 3 US-Overall | 2 | 2 | #####    | ##### |  |
| 59 | 1 US | 2020-15 | 3 US-Overall | 2 | 3 | #####    | ##### |  |
| 60 | 1 US | 2020-15 | 3 US-Overall | 2 | 4 | #####    | ##### |  |

|    |      |         |              |   |   |          |          |  |
|----|------|---------|--------------|---|---|----------|----------|--|
| 1  |      |         |              |   |   |          |          |  |
| 2  |      |         |              |   |   |          |          |  |
| 3  | 1 US | 2020-15 | 3 US-Overall | 2 | 3 | #####    | #####    |  |
| 4  | 1 US | 2020-15 | 3 US-Overall | 2 | 4 | #####    | #####    |  |
| 5  | 1 US | 2020-15 | 3 US-Overall | 2 | 5 | #####    | #####    |  |
| 6  | 1 US | 2020-15 | 3 US-Overall | 3 | 1 | #####    | #####    |  |
| 7  | 1 US | 2020-15 | 3 US-Overall | 3 | 2 | #####    | #####    |  |
| 8  | 1 US | 2020-15 | 3 US-Overall | 3 | 3 | 0        | 0        |  |
| 9  | 1 US | 2020-15 | 3 US-Overall | 3 | 4 | #####    | #####    |  |
| 10 | 1 US | 2020-15 | 3 US-Overall | 3 | 5 | #####    | #####    |  |
| 11 | 1 US | 2020-15 | 3 US-South   | 1 | 1 | #####    | #####    |  |
| 12 | 1 US | 2020-15 | 3 US-South   | 1 | 2 | 0        | 0        |  |
| 13 | 1 US | 2020-15 | 3 US-South   | 1 | 3 | 0        | 0        |  |
| 14 | 1 US | 2020-15 | 3 US-South   | 1 | 4 | #####    | #####    |  |
| 15 | 1 US | 2020-15 | 3 US-South   | 1 | 5 | #####    | #####    |  |
| 16 | 1 US | 2020-15 | 3 US-South   | 2 | 1 | #####    | #####    |  |
| 17 | 1 US | 2020-15 | 3 US-South   | 2 | 2 | 0        | 0        |  |
| 18 | 1 US | 2020-15 | 3 US-South   | 2 | 3 | 0        | 0        |  |
| 19 | 1 US | 2020-15 | 3 US-South   | 2 | 4 | #####    | #####    |  |
| 20 | 1 US | 2020-15 | 3 US-South   | 2 | 5 | #####    | #####    |  |
| 21 | 1 US | 2020-15 | 3 US-South   | 3 | 1 | #####    | #####    |  |
| 22 | 1 US | 2020-15 | 3 US-South   | 3 | 2 | 0        | 0        |  |
| 23 | 1 US | 2020-15 | 3 US-South   | 3 | 3 | 0        | 0        |  |
| 24 | 1 US | 2020-15 | 3 US-South   | 3 | 4 | #####    | #####    |  |
| 25 | 1 US | 2020-15 | 3 US-South   | 3 | 5 | #####    | #####    |  |
| 26 | 1 US | 2020-15 | 3 US-West    | 1 | 1 | #####    | #####    |  |
| 27 | 1 US | 2020-15 | 3 US-West    | 1 | 2 | #####    | #####    |  |
| 28 | 1 US | 2020-15 | 3 US-West    | 1 | 3 | #####    | #####    |  |
| 29 | 1 US | 2020-15 | 3 US-West    | 1 | 4 | #####    | #####    |  |
| 30 | 1 US | 2020-15 | 3 US-West    | 1 | 5 | #####    | #####    |  |
| 31 | 1 US | 2020-15 | 3 US-West    | 2 | 1 | #####    | #####    |  |
| 32 | 1 US | 2020-15 | 3 US-West    | 2 | 2 | #####    | #####    |  |
| 33 | 1 US | 2020-15 | 3 US-West    | 2 | 3 | #####    | #####    |  |
| 34 | 1 US | 2020-15 | 3 US-West    | 2 | 4 | 0        | 0        |  |
| 35 | 1 US | 2020-15 | 3 US-West    | 2 | 5 | #####    | #####    |  |
| 36 | 1 US | 2020-15 | 3 US-West    | 3 | 1 | #####    | #####    |  |
| 37 | 1 US | 2020-15 | 3 US-West    | 3 | 2 | 0        | 0        |  |
| 38 | 1 US | 2020-15 | 3 US-West    | 3 | 3 | 0        | 0        |  |
| 39 | 1 US | 2020-15 | 3 US-West    | 3 | 4 | #####    | #####    |  |
| 40 | 1 US | 2020-15 | 3 US-West    | 3 | 5 | 0        | 0        |  |
| 41 | 1 US | 2020-15 | 4 US-Midwes  | 1 | 1 | 1.754916 | #####    |  |
| 42 | 1 US | 2020-15 | 4 US-Midwes  | 1 | 2 | 2.521756 | #####    |  |
| 43 | 1 US | 2020-15 | 4 US-Midwes  | 1 | 3 | 2.248482 | #####    |  |
| 44 | 1 US | 2020-15 | 4 US-Midwes  | 1 | 4 | 1.575536 | #####    |  |
| 45 | 1 US | 2020-15 | 4 US-Midwes  | 1 | 5 | #####    | #####    |  |
| 46 | 1 US | 2020-15 | 4 US-Midwes  | 2 | 1 | 1.267409 | #####    |  |
| 47 | 1 US | 2020-15 | 4 US-Midwes  | 2 | 2 | 1.983607 | #####    |  |
| 48 | 1 US | 2020-15 | 4 US-Midwes  | 2 | 3 | 1.869281 | #####    |  |
| 49 | 1 US | 2020-15 | 4 US-Midwes  | 2 | 4 | #####    | #####    |  |
| 50 | 1 US | 2020-15 | 4 US-Midwes  | 2 | 5 | #####    | #####    |  |
| 51 | 1 US | 2020-15 | 4 US-Midwes  | 3 | 1 | 2.590698 | #####    |  |
| 52 | 1 US | 2020-15 | 4 US-Midwes  | 3 | 2 | 3.636364 | 2.426783 |  |
| 53 | 1 US | 2020-15 | 4 US-Midwes  | 3 | 3 | 2.891892 | #####    |  |
| 54 | 1 US | 2020-15 | 4 US-Midwes  | 3 | 4 | 2.790698 | #####    |  |
| 55 | 1 US | 2020-15 | 4 US-Midwes  | 3 | 5 | #####    | #####    |  |
| 56 | 1 US | 2020-15 | 4 US-Northe  | 1 | 1 | 1.774142 | #####    |  |
| 57 | 1 US | 2020-15 | 4 US-Northe  | 1 | 2 | 2.351353 | #####    |  |
| 58 | 1 US | 2020-15 | 4 US-Northe  | 1 | 3 | 1.788842 | #####    |  |
| 59 | 1 US | 2020-15 | 4 US-Northe  | 1 | 3 | 1.788842 | #####    |  |
| 60 | 1 US | 2020-15 | 4 US-Northe  | 1 | 3 | 1.788842 | #####    |  |

|    |      |         |              |   |   |          |          |  |
|----|------|---------|--------------|---|---|----------|----------|--|
| 1  |      |         |              |   |   |          |          |  |
| 2  |      |         |              |   |   |          |          |  |
| 3  | 1 US | 2020-15 | 4 US-Northea | 1 | 4 | 2.409174 | #####    |  |
| 4  | 1 US | 2020-15 | 4 US-Northea | 1 | 5 | #####    | #####    |  |
| 5  | 1 US | 2020-15 | 4 US-Northea | 2 | 1 | 1.917833 | #####    |  |
| 6  | 1 US | 2020-15 | 4 US-Northea | 2 | 2 | 2.088235 | #####    |  |
| 7  | 1 US | 2020-15 | 4 US-Northea | 2 | 3 | 2.293333 | #####    |  |
| 8  | 1 US | 2020-15 | 4 US-Northea | 2 | 4 | 2.358025 | #####    |  |
| 9  | 1 US | 2020-15 | 4 US-Northea | 2 | 5 | #####    | #####    |  |
| 10 | 1 US | 2020-15 | 4 US-Northea | 3 | 1 | 1.56969  | #####    |  |
| 11 | 1 US | 2020-15 | 4 US-Northea | 3 | 2 | 2.5625   | 1.55873  |  |
| 12 | 1 US | 2020-15 | 4 US-Northea | 3 | 3 | 1        | #####    |  |
| 13 | 1 US | 2020-15 | 4 US-Northea | 3 | 4 | 2.5      | #####    |  |
| 14 | 1 US | 2020-15 | 4 US-Northea | 3 | 5 | #####    | 0.104447 |  |
| 15 | 1 US | 2020-15 | 4 US-Overall | 1 | 1 | 1.436467 | #####    |  |
| 16 | 1 US | 2020-15 | 4 US-Overall | 1 | 2 | 1.492318 | #####    |  |
| 17 | 1 US | 2020-15 | 4 US-Overall | 1 | 3 | 1.879364 | #####    |  |
| 18 | 1 US | 2020-15 | 4 US-Overall | 1 | 4 | 1.612729 | #####    |  |
| 19 | 1 US | 2020-15 | 4 US-Overall | 1 | 5 | #####    | #####    |  |
| 20 | 1 US | 2020-15 | 4 US-Overall | 2 | 1 | 1.149956 | #####    |  |
| 21 | 1 US | 2020-15 | 4 US-Overall | 2 | 2 | 1.577946 | #####    |  |
| 22 | 1 US | 2020-15 | 4 US-Overall | 2 | 3 | 1.32862  | #####    |  |
| 23 | 1 US | 2020-15 | 4 US-Overall | 2 | 4 | 1.35351  | #####    |  |
| 24 | 1 US | 2020-15 | 4 US-Overall | 2 | 5 | #####    | #####    |  |
| 25 | 1 US | 2020-15 | 4 US-Overall | 3 | 1 | 1.892959 | #####    |  |
| 26 | 1 US | 2020-15 | 4 US-Overall | 3 | 2 | 1.394914 | #####    |  |
| 27 | 1 US | 2020-15 | 4 US-Overall | 3 | 3 | 2.907125 | #####    |  |
| 28 | 1 US | 2020-15 | 4 US-Overall | 3 | 4 | 1.976448 | #####    |  |
| 29 | 1 US | 2020-15 | 4 US-Overall | 3 | 5 | #####    | #####    |  |
| 30 | 1 US | 2020-15 | 4 US-Overall | 3 | 5 | #####    | #####    |  |
| 31 | 1 US | 2020-15 | 4 US-South   | 1 | 1 | 1.295516 | #####    |  |
| 32 | 1 US | 2020-15 | 4 US-South   | 1 | 2 | #####    | #####    |  |
| 33 | 1 US | 2020-15 | 4 US-South   | 1 | 3 | 2.262126 | #####    |  |
| 34 | 1 US | 2020-15 | 4 US-South   | 1 | 4 | 1.215855 | #####    |  |
| 35 | 1 US | 2020-15 | 4 US-South   | 1 | 5 | #####    | #####    |  |
| 36 | 1 US | 2020-15 | 4 US-South   | 2 | 1 | #####    | #####    |  |
| 37 | 1 US | 2020-15 | 4 US-South   | 2 | 2 | 0.88     | #####    |  |
| 38 | 1 US | 2020-15 | 4 US-South   | 2 | 3 | 1.081081 | #####    |  |
| 39 | 1 US | 2020-15 | 4 US-South   | 2 | 4 | 1.271429 | #####    |  |
| 40 | 1 US | 2020-15 | 4 US-South   | 2 | 5 | #####    | #####    |  |
| 41 | 1 US | 2020-15 | 4 US-South   | 3 | 1 | 1.955737 | #####    |  |
| 42 | 1 US | 2020-15 | 4 US-South   | 3 | 2 | 0        | 0        |  |
| 43 | 1 US | 2020-15 | 4 US-South   | 3 | 3 | 5.315789 | 1.770954 |  |
| 44 | 1 US | 2020-15 | 4 US-South   | 3 | 4 | 1.146667 | #####    |  |
| 45 | 1 US | 2020-15 | 4 US-South   | 3 | 5 | #####    | #####    |  |
| 46 | 1 US | 2020-15 | 4 US-West    | 1 | 1 | 1.088777 | #####    |  |
| 47 | 1 US | 2020-15 | 4 US-West    | 1 | 2 | 1.176819 | #####    |  |
| 48 | 1 US | 2020-15 | 4 US-West    | 1 | 3 | 1.088298 | #####    |  |
| 49 | 1 US | 2020-15 | 4 US-West    | 1 | 4 | 1.601432 | #####    |  |
| 50 | 1 US | 2020-15 | 4 US-West    | 1 | 5 | #####    | #####    |  |
| 51 | 1 US | 2020-15 | 4 US-West    | 2 | 1 | #####    | #####    |  |
| 52 | 1 US | 2020-15 | 4 US-West    | 2 | 2 | 1.547619 | #####    |  |
| 53 | 1 US | 2020-15 | 4 US-West    | 2 | 3 | #####    | #####    |  |
| 54 | 1 US | 2020-15 | 4 US-West    | 2 | 4 | 1.183007 | #####    |  |
| 55 | 1 US | 2020-15 | 4 US-West    | 2 | 5 | 0.15     | #####    |  |
| 56 | 1 US | 2020-15 | 4 US-West    | 3 | 1 | 1.542855 | #####    |  |
| 57 | 1 US | 2020-15 | 4 US-West    | 3 | 2 | 0.75     | #####    |  |
| 58 | 1 US | 2020-15 | 4 US-West    | 3 | 3 | 1.897436 | #####    |  |
| 59 | 1 US | 2020-15 | 4 US-West    | 3 | 4 | 2.208333 | #####    |  |
| 60 | 1 US | 2020-15 | 4 US-West    | 3 | 4 | 2.208333 | #####    |  |

|    |      |         |              |   |   |          |       |
|----|------|---------|--------------|---|---|----------|-------|
| 1  |      |         |              |   |   |          |       |
| 2  |      |         |              |   |   |          |       |
| 3  | 1 US | 2020-15 | 4 US-West    | 3 | 5 | #####    | ##### |
| 4  | 1 US | 2020-15 | 5 US-Midwes  | 1 | 1 | 1.493196 | ##### |
| 5  | 1 US | 2020-15 | 5 US-Midwes  | 1 | 2 | 1.013071 | ##### |
| 6  | 1 US | 2020-15 | 5 US-Midwes  | 1 | 3 | 1.798322 | ##### |
| 7  | 1 US | 2020-15 | 5 US-Midwes  | 1 | 4 | 1.400819 | ##### |
| 8  | 1 US | 2020-15 | 5 US-Midwes  | 1 | 5 | 1.598159 | ##### |
| 9  | 1 US | 2020-15 | 5 US-Midwes  | 2 | 1 | 1.190844 | ##### |
| 10 | 1 US | 2020-15 | 5 US-Midwes  | 2 | 2 | 1.41791  | ##### |
| 11 | 1 US | 2020-15 | 5 US-Midwes  | 2 | 3 | 1.147436 | ##### |
| 12 | 1 US | 2020-15 | 5 US-Midwes  | 2 | 4 | #####    | ##### |
| 13 | 1 US | 2020-15 | 5 US-Midwes  | 2 | 5 | 1.575    | ##### |
| 14 | 1 US | 2020-15 | 5 US-Midwes  | 3 | 1 | 2.024342 | ##### |
| 15 | 1 US | 2020-15 | 5 US-Midwes  | 3 | 2 | 0        | 0     |
| 16 | 1 US | 2020-15 | 5 US-Midwes  | 3 | 3 | 2.894737 | ##### |
| 17 | 1 US | 2020-15 | 5 US-Midwes  | 3 | 4 | 2.139535 | ##### |
| 18 | 1 US | 2020-15 | 5 US-Midwes  | 3 | 5 | 1.652174 | ##### |
| 19 | 1 US | 2020-15 | 5 US-Northea | 1 | 1 | 1.358838 | ##### |
| 20 | 1 US | 2020-15 | 5 US-Northea | 1 | 2 | #####    | ##### |
| 21 | 1 US | 2020-15 | 5 US-Northea | 1 | 3 | 1.264854 | ##### |
| 22 | 1 US | 2020-15 | 5 US-Northea | 1 | 4 | 1.81161  | ##### |
| 23 | 1 US | 2020-15 | 5 US-Northea | 1 | 5 | 1.174084 | ##### |
| 24 | 1 US | 2020-15 | 5 US-Northea | 2 | 1 | 1.142112 | ##### |
| 25 | 1 US | 2020-15 | 5 US-Northea | 2 | 2 | #####    | ##### |
| 26 | 1 US | 2020-15 | 5 US-Northea | 2 | 3 | #####    | ##### |
| 27 | 1 US | 2020-15 | 5 US-Northea | 2 | 4 | 1.761905 | ##### |
| 28 | 1 US | 2020-15 | 5 US-Northea | 2 | 5 | #####    | ##### |
| 29 | 1 US | 2020-15 | 5 US-Northea | 3 | 1 | 1.680988 | ##### |
| 30 | 1 US | 2020-15 | 5 US-Northea | 3 | 2 | #####    | ##### |
| 31 | 1 US | 2020-15 | 5 US-Northea | 3 | 3 | 2        | ##### |
| 32 | 1 US | 2020-15 | 5 US-Northea | 3 | 4 | 1.901639 | ##### |
| 33 | 1 US | 2020-15 | 5 US-Northea | 3 | 5 | 1.68     | ##### |
| 34 | 1 US | 2020-15 | 5 US-Overall | 1 | 1 | 1.404446 | ##### |
| 35 | 1 US | 2020-15 | 5 US-Overall | 1 | 2 | #####    | ##### |
| 36 | 1 US | 2020-15 | 5 US-Overall | 1 | 3 | 1.193602 | ##### |
| 37 | 1 US | 2020-15 | 5 US-Overall | 1 | 4 | 1.82646  | ##### |
| 38 | 1 US | 2020-15 | 5 US-Overall | 1 | 5 | 1.478873 | ##### |
| 39 | 1 US | 2020-15 | 5 US-Overall | 2 | 1 | 1.232746 | ##### |
| 40 | 1 US | 2020-15 | 5 US-Overall | 2 | 2 | 1.162393 | ##### |
| 41 | 1 US | 2020-15 | 5 US-Overall | 2 | 3 | 1.019712 | ##### |
| 42 | 1 US | 2020-15 | 5 US-Overall | 2 | 4 | 1.481956 | ##### |
| 43 | 1 US | 2020-15 | 5 US-Overall | 2 | 5 | 1.314261 | ##### |
| 44 | 1 US | 2020-15 | 5 US-Overall | 3 | 1 | 1.685735 | ##### |
| 45 | 1 US | 2020-15 | 5 US-Overall | 3 | 2 | #####    | ##### |
| 46 | 1 US | 2020-15 | 5 US-Overall | 3 | 3 | 1.526827 | ##### |
| 47 | 1 US | 2020-15 | 5 US-Overall | 3 | 4 | 2.321286 | ##### |
| 48 | 1 US | 2020-15 | 5 US-Overall | 3 | 5 | 1.806326 | ##### |
| 49 | 1 US | 2020-15 | 5 US-South   | 1 | 1 | 1.330107 | ##### |
| 50 | 1 US | 2020-15 | 5 US-South   | 1 | 2 | #####    | ##### |
| 51 | 1 US | 2020-15 | 5 US-South   | 1 | 3 | #####    | ##### |
| 52 | 1 US | 2020-15 | 5 US-South   | 1 | 4 | 1.999909 | ##### |
| 53 | 1 US | 2020-15 | 5 US-South   | 1 | 5 | 1.470085 | ##### |
| 54 | 1 US | 2020-15 | 5 US-South   | 2 | 1 | 1.254695 | ##### |
| 55 | 1 US | 2020-15 | 5 US-South   | 2 | 2 | #####    | ##### |
| 56 | 1 US | 2020-15 | 5 US-South   | 2 | 3 | 1.111111 | ##### |
| 57 | 1 US | 2020-15 | 5 US-South   | 2 | 4 | 1.630137 | ##### |
| 58 | 1 US | 2020-15 | 5 US-South   | 2 | 5 | 1.443609 | ##### |
| 59 | 1 US | 2020-15 | 5 US-South   | 2 |   |          |       |
| 60 | 1 US | 2020-15 | 5 US-South   | 2 |   |          |       |

|    |      |         |              |   |   |          |       |
|----|------|---------|--------------|---|---|----------|-------|
| 1  |      |         |              |   |   |          |       |
| 2  |      |         |              |   |   |          |       |
| 3  | 1 US | 2020-15 | 5 US-South   | 3 | 1 | 1.463876 | ##### |
| 4  | 1 US | 2020-15 | 5 US-South   | 3 | 2 | #####    | ##### |
| 5  | 1 US | 2020-15 | 5 US-South   | 3 | 3 | #####    | ##### |
| 6  | 1 US | 2020-15 | 5 US-South   | 3 | 4 | 2.473684 | ##### |
| 7  | 1 US | 2020-15 | 5 US-South   | 3 | 5 | 1.526316 | ##### |
| 8  | 1 US | 2020-15 | 5 US-West    | 1 | 1 | 1.479147 | ##### |
| 9  | 1 US | 2020-15 | 5 US-West    | 1 | 2 | 1.466915 | ##### |
| 10 | 1 US | 2020-15 | 5 US-West    | 1 | 3 | 1.009306 | ##### |
| 11 | 1 US | 2020-15 | 5 US-West    | 1 | 4 | 1.978759 | ##### |
| 12 | 1 US | 2020-15 | 5 US-West    | 1 | 5 | 1.662783 | ##### |
| 13 | 1 US | 2020-15 | 5 US-West    | 2 | 1 | 1.311847 | ##### |
| 14 | 1 US | 2020-15 | 5 US-West    | 2 | 2 | 1.785714 | ##### |
| 15 | 1 US | 2020-15 | 5 US-West    | 2 | 3 | #####    | ##### |
| 16 | 1 US | 2020-15 | 5 US-West    | 2 | 4 | 1.581699 | ##### |
| 17 | 1 US | 2020-15 | 5 US-West    | 2 | 5 | 1.285714 | ##### |
| 18 | 1 US | 2020-15 | 5 US-West    | 3 | 1 | 1.729125 | ##### |
| 19 | 1 US | 2020-15 | 5 US-West    | 3 | 2 | 1.157895 | ##### |
| 20 | 1 US | 2020-15 | 5 US-West    | 3 | 3 | 1.128205 | ##### |
| 21 | 1 US | 2020-15 | 5 US-West    | 3 | 4 | 2.57971  | ##### |
| 22 | 1 US | 2020-15 | 5 US-West    | 3 | 5 | 2.478261 | ##### |
| 23 | 2 BE | 2020-14 | 1 BE-Brussel | 1 | 1 | 2.142514 | ##### |
| 24 | 2 BE | 2020-14 | 1 BE-Brussel | 1 | 2 | 1.974696 | ##### |
| 25 | 2 BE | 2020-14 | 1 BE-Brussel | 1 | 3 | 2.841771 | ##### |
| 26 | 2 BE | 2020-14 | 1 BE-Brussel | 1 | 4 | 1.66763  | ##### |
| 27 | 2 BE | 2020-14 | 1 BE-Brussel | 1 | 5 | 1.489135 | ##### |
| 28 | 2 BE | 2020-14 | 1 BE-Brussel | 2 | 1 | 2.387655 | ##### |
| 29 | 2 BE | 2020-14 | 1 BE-Brussel | 2 | 2 | 2.571429 | ##### |
| 30 | 2 BE | 2020-14 | 1 BE-Brussel | 2 | 3 | 2.65     | ##### |
| 31 | 2 BE | 2020-14 | 1 BE-Brussel | 2 | 4 | 2.333333 | ##### |
| 32 | 2 BE | 2020-14 | 1 BE-Brussel | 2 | 5 | 1.73913  | ##### |
| 33 | 2 BE | 2020-14 | 1 BE-Brussel | 3 | 1 | 1.736137 | ##### |
| 34 | 2 BE | 2020-14 | 1 BE-Brussel | 3 | 2 | 0.5      | ##### |
| 35 | 2 BE | 2020-14 | 1 BE-Brussel | 3 | 3 | 3.2      | ##### |
| 36 | 2 BE | 2020-14 | 1 BE-Brussel | 3 | 4 | #####    | ##### |
| 37 | 2 BE | 2020-14 | 1 BE-Brussel | 3 | 5 | 1.2      | ##### |
| 38 | 2 BE | 2020-14 | 1 BE-Flander | 1 | 1 | 3.02595  | ##### |
| 39 | 2 BE | 2020-14 | 1 BE-Flander | 1 | 2 | 4.069406 | ##### |
| 40 | 2 BE | 2020-14 | 1 BE-Flander | 1 | 3 | 4.18184  | ##### |
| 41 | 2 BE | 2020-14 | 1 BE-Flander | 1 | 4 | 2.956792 | ##### |
| 42 | 2 BE | 2020-14 | 1 BE-Flander | 1 | 5 | 1.326791 | ##### |
| 43 | 2 BE | 2020-14 | 1 BE-Flander | 2 | 1 | 2.483265 | ##### |
| 44 | 2 BE | 2020-14 | 1 BE-Flander | 2 | 2 | 4.416667 | ##### |
| 45 | 2 BE | 2020-14 | 1 BE-Flander | 2 | 3 | 2.897959 | ##### |
| 46 | 2 BE | 2020-14 | 1 BE-Flander | 2 | 4 | 2.720721 | ##### |
| 47 | 2 BE | 2020-14 | 1 BE-Flander | 2 | 5 | 1.147541 | ##### |
| 48 | 2 BE | 2020-14 | 1 BE-Flander | 3 | 1 | 3.610946 | ##### |
| 49 | 2 BE | 2020-14 | 1 BE-Flander | 3 | 2 | 3.75     | ##### |
| 50 | 2 BE | 2020-14 | 1 BE-Flander | 3 | 3 | 4.966667 | ##### |
| 51 | 2 BE | 2020-14 | 1 BE-Flander | 3 | 4 | 3.276596 | ##### |
| 52 | 2 BE | 2020-14 | 1 BE-Flander | 3 | 5 | 1.617647 | ##### |
| 53 | 2 BE | 2020-14 | 1 BE-Overall | 1 | 1 | 2.85051  | ##### |
| 54 | 2 BE | 2020-14 | 1 BE-Overall | 1 | 2 | 3.334295 | ##### |
| 55 | 2 BE | 2020-14 | 1 BE-Overall | 1 | 3 | 3.766281 | ##### |
| 56 | 2 BE | 2020-14 | 1 BE-Overall | 1 | 4 | 2.778878 | ##### |
| 57 | 2 BE | 2020-14 | 1 BE-Overall | 1 | 5 | 1.419974 | ##### |
| 58 | 2 BE | 2020-14 | 1 BE-Overall | 2 | 1 | 2.574374 | ##### |
| 59 | 2 BE | 2020-14 | 1 BE-Overall | 2 |   |          |       |
| 60 | 2 BE | 2020-14 | 1 BE-Overall | 2 |   |          |       |

|    |      |         |              |   |   |          |       |  |
|----|------|---------|--------------|---|---|----------|-------|--|
| 1  |      |         |              |   |   |          |       |  |
| 2  |      |         |              |   |   |          |       |  |
| 3  | 2 BE | 2020-14 | 1 BE-Overall | 2 | 2 | 3.52448  | ##### |  |
| 4  | 2 BE | 2020-14 | 1 BE-Overall | 2 | 3 | 3.193033 | ##### |  |
| 5  | 2 BE | 2020-14 | 1 BE-Overall | 2 | 4 | 2.688451 | ##### |  |
| 6  | 2 BE | 2020-14 | 1 BE-Overall | 2 | 5 | 1.323444 | ##### |  |
| 7  | 2 BE | 2020-14 | 1 BE-Overall | 3 | 1 | 3.181379 | ##### |  |
| 8  | 2 BE | 2020-14 | 1 BE-Overall | 3 | 2 | 3.11936  | ##### |  |
| 9  | 2 BE | 2020-14 | 1 BE-Overall | 3 | 3 | 4.261442 | ##### |  |
| 10 | 2 BE | 2020-14 | 1 BE-Overall | 3 | 4 | 2.894311 | ##### |  |
| 11 | 2 BE | 2020-14 | 1 BE-Overall | 3 | 5 | 1.592397 | ##### |  |
| 12 | 2 BE | 2020-14 | 1 BE-Walloni | 1 | 1 | 2.753692 | ##### |  |
| 13 | 2 BE | 2020-14 | 1 BE-Walloni | 1 | 2 | 2.805451 | ##### |  |
| 14 | 2 BE | 2020-14 | 1 BE-Walloni | 1 | 3 | 3.488179 | ##### |  |
| 15 | 2 BE | 2020-14 | 1 BE-Walloni | 1 | 4 | 2.678949 | ##### |  |
| 16 | 2 BE | 2020-14 | 1 BE-Walloni | 1 | 5 | 1.600126 | ##### |  |
| 17 | 2 BE | 2020-14 | 1 BE-Walloni | 2 | 1 | 2.765787 | ##### |  |
| 18 | 2 BE | 2020-14 | 1 BE-Walloni | 2 | 2 | 2.931507 | ##### |  |
| 19 | 2 BE | 2020-14 | 1 BE-Walloni | 2 | 3 | 3.726316 | ##### |  |
| 20 | 2 BE | 2020-14 | 1 BE-Walloni | 2 | 4 | 2.712121 | ##### |  |
| 21 | 2 BE | 2020-14 | 1 BE-Walloni | 2 | 5 | 1.553191 | ##### |  |
| 22 | 2 BE | 2020-14 | 1 BE-Walloni | 3 | 1 | 2.737854 | ##### |  |
| 23 | 2 BE | 2020-14 | 1 BE-Walloni | 3 | 2 | 2.65     | ##### |  |
| 24 | 2 BE | 2020-14 | 1 BE-Walloni | 3 | 3 | 3.230769 | ##### |  |
| 25 | 2 BE | 2020-14 | 1 BE-Walloni | 3 | 4 | 2.642857 | ##### |  |
| 26 | 2 BE | 2020-14 | 1 BE-Walloni | 3 | 5 | 1.722222 | ##### |  |
| 27 | 2 BE | 2020-14 | 2 BE-Brussel | 1 | 1 | 1.12194  | ##### |  |
| 28 | 2 BE | 2020-14 | 2 BE-Brussel | 1 | 2 | 1.057421 | ##### |  |
| 29 | 2 BE | 2020-14 | 2 BE-Brussel | 1 | 3 | 1.391648 | ##### |  |
| 30 | 2 BE | 2020-14 | 2 BE-Brussel | 1 | 4 | #####    | ##### |  |
| 31 | 2 BE | 2020-14 | 2 BE-Brussel | 1 | 5 | #####    | ##### |  |
| 32 | 2 BE | 2020-14 | 2 BE-Brussel | 2 | 1 | 1.280171 | ##### |  |
| 33 | 2 BE | 2020-14 | 2 BE-Brussel | 2 | 2 | 1.272727 | ##### |  |
| 34 | 2 BE | 2020-14 | 2 BE-Brussel | 2 | 3 | 1.512195 | ##### |  |
| 35 | 2 BE | 2020-14 | 2 BE-Brussel | 2 | 4 | 1.083333 | ##### |  |
| 36 | 2 BE | 2020-14 | 2 BE-Brussel | 2 | 5 | 1.043478 | ##### |  |
| 37 | 2 BE | 2020-14 | 2 BE-Brussel | 3 | 1 | #####    | ##### |  |
| 38 | 2 BE | 2020-14 | 2 BE-Brussel | 3 | 2 | 0.5      | ##### |  |
| 39 | 2 BE | 2020-14 | 2 BE-Brussel | 3 | 3 | 1.181818 | ##### |  |
| 40 | 2 BE | 2020-14 | 2 BE-Brussel | 3 | 4 | #####    | ##### |  |
| 41 | 2 BE | 2020-14 | 2 BE-Brussel | 3 | 5 | #####    | ##### |  |
| 42 | 2 BE | 2020-14 | 2 BE-Flander | 1 | 1 | 1.38542  | ##### |  |
| 43 | 2 BE | 2020-14 | 2 BE-Flander | 1 | 2 | 2.453028 | ##### |  |
| 44 | 2 BE | 2020-14 | 2 BE-Flander | 1 | 3 | 1.708655 | ##### |  |
| 45 | 2 BE | 2020-14 | 2 BE-Flander | 1 | 4 | 1.221766 | ##### |  |
| 46 | 2 BE | 2020-14 | 2 BE-Flander | 1 | 5 | #####    | ##### |  |
| 47 | 2 BE | 2020-14 | 2 BE-Flander | 2 | 1 | 1.327303 | ##### |  |
| 48 | 2 BE | 2020-14 | 2 BE-Flander | 2 | 2 | 2.230769 | ##### |  |
| 49 | 2 BE | 2020-14 | 2 BE-Flander | 2 | 3 | 1.783333 | ##### |  |
| 50 | 2 BE | 2020-14 | 2 BE-Flander | 2 | 4 | 1.304688 | ##### |  |
| 51 | 2 BE | 2020-14 | 2 BE-Flander | 2 | 5 | #####    | ##### |  |
| 52 | 2 BE | 2020-14 | 2 BE-Flander | 3 | 1 | 1.45132  | ##### |  |
| 53 | 2 BE | 2020-14 | 2 BE-Flander | 3 | 2 | 2.642857 | ##### |  |
| 54 | 2 BE | 2020-14 | 2 BE-Flander | 3 | 3 | 1.65625  | ##### |  |
| 55 | 2 BE | 2020-14 | 2 BE-Flander | 3 | 4 | 1.1      | ##### |  |
| 56 | 2 BE | 2020-14 | 2 BE-Flander | 3 | 5 | #####    | ##### |  |
| 57 | 2 BE | 2020-14 | 2 BE-Overall | 1 | 1 | 1.350052 | ##### |  |
| 58 | 2 BE | 2020-14 | 2 BE-Overall | 1 | 2 | 2.153027 | ##### |  |
| 59 | 2 BE | 2020-14 | 2 BE-Overall | 1 | 2 | 2.153027 | ##### |  |
| 60 | 2 BE | 2020-14 | 2 BE-Overall | 1 | 2 | 2.153027 | ##### |  |

|    |      |         |              |   |   |          |       |  |  |
|----|------|---------|--------------|---|---|----------|-------|--|--|
| 1  |      |         |              |   |   |          |       |  |  |
| 2  |      |         |              |   |   |          |       |  |  |
| 3  | 2 BE | 2020-14 | 2 BE-Overall | 1 | 3 | 1.605721 | ##### |  |  |
| 4  | 2 BE | 2020-14 | 2 BE-Overall | 1 | 4 | 1.15284  | ##### |  |  |
| 5  | 2 BE | 2020-14 | 2 BE-Overall | 1 | 5 | #####    | ##### |  |  |
| 6  | 2 BE | 2020-14 | 2 BE-Overall | 2 | 1 | 1.35974  | ##### |  |  |
| 7  | 2 BE | 2020-14 | 2 BE-Overall | 2 | 2 | 2.065163 | ##### |  |  |
| 8  | 2 BE | 2020-14 | 2 BE-Overall | 2 | 3 | 1.737736 | ##### |  |  |
| 9  | 2 BE | 2020-14 | 2 BE-Overall | 2 | 4 | 1.25329  | ##### |  |  |
| 10 | 2 BE | 2020-14 | 2 BE-Overall | 2 | 5 | #####    | ##### |  |  |
| 11 | 2 BE | 2020-14 | 2 BE-Overall | 3 | 1 | 1.338061 | ##### |  |  |
| 12 | 2 BE | 2020-14 | 2 BE-Overall | 3 | 2 | 2.248532 | ##### |  |  |
| 13 | 2 BE | 2020-14 | 2 BE-Overall | 3 | 3 | 1.484772 | ##### |  |  |
| 14 | 2 BE | 2020-14 | 2 BE-Overall | 3 | 4 | 1.013196 | ##### |  |  |
| 15 | 2 BE | 2020-14 | 2 BE-Overall | 3 | 5 | #####    | ##### |  |  |
| 16 | 2 BE | 2020-14 | 2 BE-Walloni | 1 | 1 | 1.351606 | ##### |  |  |
| 17 | 2 BE | 2020-14 | 2 BE-Walloni | 1 | 2 | 2.007764 | ##### |  |  |
| 18 | 2 BE | 2020-14 | 2 BE-Walloni | 1 | 3 | 1.522316 | ##### |  |  |
| 19 | 2 BE | 2020-14 | 2 BE-Walloni | 1 | 4 | 1.059974 | ##### |  |  |
| 20 | 2 BE | 2020-14 | 2 BE-Walloni | 1 | 5 | #####    | ##### |  |  |
| 21 | 2 BE | 2020-14 | 2 BE-Walloni | 2 | 1 | 1.435082 | ##### |  |  |
| 22 | 2 BE | 2020-14 | 2 BE-Walloni | 2 | 2 | 2.090909 | ##### |  |  |
| 23 | 2 BE | 2020-14 | 2 BE-Walloni | 2 | 3 | 1.77451  | ##### |  |  |
| 24 | 2 BE | 2020-14 | 2 BE-Walloni | 2 | 4 | 1.186667 | ##### |  |  |
| 25 | 2 BE | 2020-14 | 2 BE-Walloni | 2 | 5 | #####    | ##### |  |  |
| 26 | 2 BE | 2020-14 | 2 BE-Walloni | 3 | 1 | 1.239132 | ##### |  |  |
| 27 | 2 BE | 2020-14 | 2 BE-Walloni | 3 | 2 | 1.904762 | ##### |  |  |
| 28 | 2 BE | 2020-14 | 2 BE-Walloni | 3 | 3 | 1.243902 | ##### |  |  |
| 29 | 2 BE | 2020-14 | 2 BE-Walloni | 3 | 4 | #####    | ##### |  |  |
| 30 | 2 BE | 2020-14 | 2 BE-Walloni | 3 | 5 | #####    | ##### |  |  |
| 31 | 2 BE | 2020-14 | 3 BE-Brussel | 1 | 1 | 0        | 0     |  |  |
| 32 | 2 BE | 2020-14 | 3 BE-Brussel | 1 | 2 | 0        | 0     |  |  |
| 33 | 2 BE | 2020-14 | 3 BE-Brussel | 1 | 3 | 0        | 0     |  |  |
| 34 | 2 BE | 2020-14 | 3 BE-Brussel | 1 | 4 | 0        | 0     |  |  |
| 35 | 2 BE | 2020-14 | 3 BE-Brussel | 1 | 5 | 0        | 0     |  |  |
| 36 | 2 BE | 2020-14 | 3 BE-Brussel | 2 | 1 | 0        | 0     |  |  |
| 37 | 2 BE | 2020-14 | 3 BE-Brussel | 2 | 2 | 0        | 0     |  |  |
| 38 | 2 BE | 2020-14 | 3 BE-Brussel | 2 | 3 | 0        | 0     |  |  |
| 39 | 2 BE | 2020-14 | 3 BE-Brussel | 2 | 4 | 0        | 0     |  |  |
| 40 | 2 BE | 2020-14 | 3 BE-Brussel | 2 | 5 | 0        | 0     |  |  |
| 41 | 2 BE | 2020-14 | 3 BE-Brussel | 3 | 1 | 0        | 0     |  |  |
| 42 | 2 BE | 2020-14 | 3 BE-Brussel | 3 | 2 | 0        | 0     |  |  |
| 43 | 2 BE | 2020-14 | 3 BE-Brussel | 3 | 3 | 0        | 0     |  |  |
| 44 | 2 BE | 2020-14 | 3 BE-Brussel | 3 | 4 | 0        | 0     |  |  |
| 45 | 2 BE | 2020-14 | 3 BE-Brussel | 3 | 5 | 0        | 0     |  |  |
| 46 | 2 BE | 2020-14 | 3 BE-Brussel | 3 | 5 | 0        | 0     |  |  |
| 47 | 2 BE | 2020-14 | 3 BE-Flander | 1 | 1 | 0        | 0     |  |  |
| 48 | 2 BE | 2020-14 | 3 BE-Flander | 1 | 2 | 0        | 0     |  |  |
| 49 | 2 BE | 2020-14 | 3 BE-Flander | 1 | 3 | 0        | 0     |  |  |
| 50 | 2 BE | 2020-14 | 3 BE-Flander | 1 | 4 | 0        | 0     |  |  |
| 51 | 2 BE | 2020-14 | 3 BE-Flander | 1 | 5 | 0        | 0     |  |  |
| 52 | 2 BE | 2020-14 | 3 BE-Flander | 2 | 1 | 0        | 0     |  |  |
| 53 | 2 BE | 2020-14 | 3 BE-Flander | 2 | 2 | 0        | 0     |  |  |
| 54 | 2 BE | 2020-14 | 3 BE-Flander | 2 | 3 | 0        | 0     |  |  |
| 55 | 2 BE | 2020-14 | 3 BE-Flander | 2 | 4 | 0        | 0     |  |  |
| 56 | 2 BE | 2020-14 | 3 BE-Flander | 2 | 5 | 0        | 0     |  |  |
| 57 | 2 BE | 2020-14 | 3 BE-Flander | 3 | 1 | 0        | 0     |  |  |
| 58 | 2 BE | 2020-14 | 3 BE-Flander | 3 | 2 | 0        | 0     |  |  |
| 59 | 2 BE | 2020-14 | 3 BE-Flander | 3 | 3 | 0        | 0     |  |  |
| 60 | 2 BE | 2020-14 | 3 BE-Flander | 3 | 3 | 0        | 0     |  |  |



|    |      |         |              |   |   |          |          |  |
|----|------|---------|--------------|---|---|----------|----------|--|
| 1  |      |         |              |   |   |          |          |  |
| 2  |      |         |              |   |   |          |          |  |
| 3  | 2 BE | 2020-14 | 3 BE-Flander | 3 | 4 | 0        | 0        |  |
| 4  | 2 BE | 2020-14 | 3 BE-Flander | 3 | 5 | 0        | 0        |  |
| 5  | 2 BE | 2020-14 | 3 BE-Overall | 1 | 1 | 0        | 0        |  |
| 6  | 2 BE | 2020-14 | 3 BE-Overall | 1 | 2 | 0        | 0        |  |
| 7  | 2 BE | 2020-14 | 3 BE-Overall | 1 | 3 | 0        | 0        |  |
| 8  | 2 BE | 2020-14 | 3 BE-Overall | 1 | 4 | 0        | 0        |  |
| 9  | 2 BE | 2020-14 | 3 BE-Overall | 1 | 5 | 0        | 0        |  |
| 10 | 2 BE | 2020-14 | 3 BE-Overall | 2 | 1 | 0        | 0        |  |
| 11 | 2 BE | 2020-14 | 3 BE-Overall | 2 | 2 | 0        | 0        |  |
| 12 | 2 BE | 2020-14 | 3 BE-Overall | 2 | 3 | 0        | 0        |  |
| 13 | 2 BE | 2020-14 | 3 BE-Overall | 2 | 4 | 0        | 0        |  |
| 14 | 2 BE | 2020-14 | 3 BE-Overall | 2 | 5 | 0        | 0        |  |
| 15 | 2 BE | 2020-14 | 3 BE-Overall | 3 | 1 | 0        | 0        |  |
| 16 | 2 BE | 2020-14 | 3 BE-Overall | 3 | 2 | 0        | 0        |  |
| 17 | 2 BE | 2020-14 | 3 BE-Overall | 3 | 3 | 0        | 0        |  |
| 18 | 2 BE | 2020-14 | 3 BE-Overall | 3 | 4 | 0        | 0        |  |
| 19 | 2 BE | 2020-14 | 3 BE-Overall | 3 | 5 | 0        | 0        |  |
| 20 | 2 BE | 2020-14 | 3 BE-Overall | 3 | 5 | 0        | 0        |  |
| 21 | 2 BE | 2020-14 | 3 BE-Walloni | 1 | 1 | 0        | 0        |  |
| 22 | 2 BE | 2020-14 | 3 BE-Walloni | 1 | 2 | 0        | 0        |  |
| 23 | 2 BE | 2020-14 | 3 BE-Walloni | 1 | 3 | 0        | 0        |  |
| 24 | 2 BE | 2020-14 | 3 BE-Walloni | 1 | 4 | 0        | 0        |  |
| 25 | 2 BE | 2020-14 | 3 BE-Walloni | 1 | 5 | 0        | 0        |  |
| 26 | 2 BE | 2020-14 | 3 BE-Walloni | 2 | 1 | 0        | 0        |  |
| 27 | 2 BE | 2020-14 | 3 BE-Walloni | 2 | 2 | 0        | 0        |  |
| 28 | 2 BE | 2020-14 | 3 BE-Walloni | 2 | 3 | 0        | 0        |  |
| 29 | 2 BE | 2020-14 | 3 BE-Walloni | 2 | 4 | 0        | 0        |  |
| 30 | 2 BE | 2020-14 | 3 BE-Walloni | 2 | 5 | 0        | 0        |  |
| 31 | 2 BE | 2020-14 | 3 BE-Walloni | 3 | 1 | 0        | 0        |  |
| 32 | 2 BE | 2020-14 | 3 BE-Walloni | 3 | 2 | 0        | 0        |  |
| 33 | 2 BE | 2020-14 | 3 BE-Walloni | 3 | 3 | 0        | 0        |  |
| 34 | 2 BE | 2020-14 | 3 BE-Walloni | 3 | 4 | 0        | 0        |  |
| 35 | 2 BE | 2020-14 | 3 BE-Walloni | 3 | 5 | 0        | 0        |  |
| 36 | 2 BE | 2020-14 | 4 BE-Brussel | 1 | 1 | #####    | #####    |  |
| 37 | 2 BE | 2020-14 | 4 BE-Brussel | 1 | 2 | #####    | #####    |  |
| 38 | 2 BE | 2020-14 | 4 BE-Brussel | 1 | 3 | #####    | #####    |  |
| 39 | 2 BE | 2020-14 | 4 BE-Brussel | 1 | 4 | #####    | #####    |  |
| 40 | 2 BE | 2020-14 | 4 BE-Brussel | 1 | 5 | #####    | #####    |  |
| 41 | 2 BE | 2020-14 | 4 BE-Brussel | 2 | 1 | #####    | #####    |  |
| 42 | 2 BE | 2020-14 | 4 BE-Brussel | 2 | 2 | #####    | #####    |  |
| 43 | 2 BE | 2020-14 | 4 BE-Brussel | 2 | 3 | #####    | #####    |  |
| 44 | 2 BE | 2020-14 | 4 BE-Brussel | 2 | 4 | #####    | #####    |  |
| 45 | 2 BE | 2020-14 | 4 BE-Brussel | 2 | 5 | #####    | #####    |  |
| 46 | 2 BE | 2020-14 | 4 BE-Brussel | 3 | 1 | #####    | #####    |  |
| 47 | 2 BE | 2020-14 | 4 BE-Brussel | 3 | 2 | 0        | 0        |  |
| 48 | 2 BE | 2020-14 | 4 BE-Brussel | 3 | 3 | 1.272727 | #####    |  |
| 49 | 2 BE | 2020-14 | 4 BE-Brussel | 3 | 4 | 1.25     | 1.196943 |  |
| 50 | 2 BE | 2020-14 | 4 BE-Brussel | 3 | 5 | 0        | 0        |  |
| 51 | 2 BE | 2020-14 | 4 BE-Flander | 1 | 1 | 1.291145 | #####    |  |
| 52 | 2 BE | 2020-14 | 4 BE-Flander | 1 | 2 | 1.167609 | #####    |  |
| 53 | 2 BE | 2020-14 | 4 BE-Flander | 1 | 3 | 2.829751 | #####    |  |
| 54 | 2 BE | 2020-14 | 4 BE-Flander | 1 | 4 | #####    | #####    |  |
| 55 | 2 BE | 2020-14 | 4 BE-Flander | 1 | 5 | #####    | #####    |  |
| 56 | 2 BE | 2020-14 | 4 BE-Flander | 2 | 1 | #####    | #####    |  |
| 57 | 2 BE | 2020-14 | 4 BE-Flander | 2 | 2 | 2.255814 | #####    |  |
| 58 | 2 BE | 2020-14 | 4 BE-Flander | 2 | 3 | 1.464286 | #####    |  |
| 59 | 2 BE | 2020-14 | 4 BE-Flander | 2 | 4 | 0.9375   | #####    |  |
| 60 | 2 BE | 2020-14 | 4 BE-Flander | 2 | 4 | 0.9375   | #####    |  |

|    |      |         |              |   |   |          |          |  |
|----|------|---------|--------------|---|---|----------|----------|--|
| 1  |      |         |              |   |   |          |          |  |
| 2  |      |         |              |   |   |          |          |  |
| 3  | 2 BE | 2020-14 | 4 BE-Flander | 2 | 5 | #####    | #####    |  |
| 4  | 2 BE | 2020-14 | 4 BE-Flander | 3 | 1 | 1.61337  | #####    |  |
| 5  | 2 BE | 2020-14 | 4 BE-Flander | 3 | 2 | #####    | #####    |  |
| 6  | 2 BE | 2020-14 | 4 BE-Flander | 3 | 3 | 3.69697  | 1.094823 |  |
| 7  | 2 BE | 2020-14 | 4 BE-Flander | 3 | 4 | #####    | #####    |  |
| 8  | 2 BE | 2020-14 | 4 BE-Flander | 3 | 5 | #####    | #####    |  |
| 9  | 2 BE | 2020-14 | 4 BE-Overall | 1 | 1 | 1.079407 | #####    |  |
| 10 | 2 BE | 2020-14 | 4 BE-Overall | 1 | 2 | #####    | #####    |  |
| 11 | 2 BE | 2020-14 | 4 BE-Overall | 1 | 3 | 2.154968 | #####    |  |
| 12 | 2 BE | 2020-14 | 4 BE-Overall | 1 | 4 | #####    | #####    |  |
| 13 | 2 BE | 2020-14 | 4 BE-Overall | 1 | 5 | #####    | #####    |  |
| 14 | 2 BE | 2020-14 | 4 BE-Overall | 2 | 1 | #####    | #####    |  |
| 15 | 2 BE | 2020-14 | 4 BE-Overall | 2 | 2 | 1.237497 | #####    |  |
| 16 | 2 BE | 2020-14 | 4 BE-Overall | 2 | 3 | 1.36811  | #####    |  |
| 17 | 2 BE | 2020-14 | 4 BE-Overall | 2 | 4 | #####    | #####    |  |
| 18 | 2 BE | 2020-14 | 4 BE-Overall | 2 | 5 | #####    | #####    |  |
| 19 | 2 BE | 2020-14 | 4 BE-Overall | 3 | 1 | 1.341938 | #####    |  |
| 20 | 2 BE | 2020-14 | 4 BE-Overall | 3 | 2 | #####    | #####    |  |
| 21 | 2 BE | 2020-14 | 4 BE-Overall | 3 | 3 | 2.85188  | #####    |  |
| 22 | 2 BE | 2020-14 | 4 BE-Overall | 3 | 4 | #####    | #####    |  |
| 23 | 2 BE | 2020-14 | 4 BE-Overall | 3 | 5 | #####    | #####    |  |
| 24 | 2 BE | 2020-14 | 4 BE-Overall | 3 | 5 | #####    | #####    |  |
| 25 | 2 BE | 2020-14 | 4 BE-Walloni | 1 | 1 | #####    | #####    |  |
| 26 | 2 BE | 2020-14 | 4 BE-Walloni | 1 | 2 | #####    | #####    |  |
| 27 | 2 BE | 2020-14 | 4 BE-Walloni | 1 | 3 | 1.641623 | #####    |  |
| 28 | 2 BE | 2020-14 | 4 BE-Walloni | 1 | 4 | #####    | #####    |  |
| 29 | 2 BE | 2020-14 | 4 BE-Walloni | 1 | 5 | #####    | #####    |  |
| 30 | 2 BE | 2020-14 | 4 BE-Walloni | 2 | 1 | #####    | #####    |  |
| 31 | 2 BE | 2020-14 | 4 BE-Walloni | 2 | 2 | #####    | #####    |  |
| 32 | 2 BE | 2020-14 | 4 BE-Walloni | 2 | 3 | 1.619048 | #####    |  |
| 33 | 2 BE | 2020-14 | 4 BE-Walloni | 2 | 4 | #####    | #####    |  |
| 34 | 2 BE | 2020-14 | 4 BE-Walloni | 2 | 5 | 0        | 0        |  |
| 35 | 2 BE | 2020-14 | 4 BE-Walloni | 3 | 1 | #####    | #####    |  |
| 36 | 2 BE | 2020-14 | 4 BE-Walloni | 3 | 2 | #####    | #####    |  |
| 37 | 2 BE | 2020-14 | 4 BE-Walloni | 3 | 3 | 1.666667 | #####    |  |
| 38 | 2 BE | 2020-14 | 4 BE-Walloni | 3 | 4 | #####    | #####    |  |
| 39 | 2 BE | 2020-14 | 4 BE-Walloni | 3 | 5 | #####    | #####    |  |
| 40 | 2 BE | 2020-14 | 5 BE-Brussel | 1 | 1 | #####    | #####    |  |
| 41 | 2 BE | 2020-14 | 5 BE-Brussel | 1 | 2 | #####    | #####    |  |
| 42 | 2 BE | 2020-14 | 5 BE-Brussel | 1 | 3 | #####    | #####    |  |
| 43 | 2 BE | 2020-14 | 5 BE-Brussel | 1 | 4 | #####    | #####    |  |
| 44 | 2 BE | 2020-14 | 5 BE-Brussel | 1 | 5 | #####    | #####    |  |
| 45 | 2 BE | 2020-14 | 5 BE-Brussel | 2 | 1 | #####    | #####    |  |
| 46 | 2 BE | 2020-14 | 5 BE-Brussel | 2 | 2 | #####    | #####    |  |
| 47 | 2 BE | 2020-14 | 5 BE-Brussel | 2 | 3 | #####    | #####    |  |
| 48 | 2 BE | 2020-14 | 5 BE-Brussel | 2 | 4 | 1.212121 | #####    |  |
| 49 | 2 BE | 2020-14 | 5 BE-Brussel | 2 | 5 | #####    | #####    |  |
| 50 | 2 BE | 2020-14 | 5 BE-Brussel | 3 | 1 | #####    | #####    |  |
| 51 | 2 BE | 2020-14 | 5 BE-Brussel | 3 | 2 | 0        | 0        |  |
| 52 | 2 BE | 2020-14 | 5 BE-Brussel | 3 | 3 | 1.5      | #####    |  |
| 53 | 2 BE | 2020-14 | 5 BE-Brussel | 3 | 4 | 0        | 0        |  |
| 54 | 2 BE | 2020-14 | 5 BE-Brussel | 3 | 5 | #####    | #####    |  |
| 55 | 2 BE | 2020-14 | 5 BE-Flander | 1 | 1 | #####    | #####    |  |
| 56 | 2 BE | 2020-14 | 5 BE-Flander | 1 | 2 | #####    | #####    |  |
| 57 | 2 BE | 2020-14 | 5 BE-Flander | 1 | 3 | #####    | #####    |  |
| 58 | 2 BE | 2020-14 | 5 BE-Flander | 1 | 4 | #####    | #####    |  |
| 59 | 2 BE | 2020-14 | 5 BE-Flander | 1 | 5 | #####    | #####    |  |
| 60 | 2 BE | 2020-14 | 5 BE-Flander | 1 | 5 | #####    | #####    |  |

|    |      |         |              |   |   |          |       |
|----|------|---------|--------------|---|---|----------|-------|
| 1  |      |         |              |   |   |          |       |
| 2  |      |         |              |   |   |          |       |
| 3  | 2 BE | 2020-14 | 5 BE-Flander | 2 | 1 | #####    | ##### |
| 4  | 2 BE | 2020-14 | 5 BE-Flander | 2 | 2 | #####    | ##### |
| 5  | 2 BE | 2020-14 | 5 BE-Flander | 2 | 3 | #####    | ##### |
| 6  | 2 BE | 2020-14 | 5 BE-Flander | 2 | 4 | #####    | ##### |
| 7  | 2 BE | 2020-14 | 5 BE-Flander | 2 | 5 | 0.4375   | ##### |
| 8  | 2 BE | 2020-14 | 5 BE-Flander | 3 | 1 | #####    | ##### |
| 9  | 2 BE | 2020-14 | 5 BE-Flander | 3 | 2 | #####    | ##### |
| 10 | 2 BE | 2020-14 | 5 BE-Flander | 3 | 3 | #####    | ##### |
| 11 | 2 BE | 2020-14 | 5 BE-Flander | 3 | 4 | 1.215686 | ##### |
| 12 | 2 BE | 2020-14 | 5 BE-Flander | 3 | 5 | #####    | ##### |
| 13 | 2 BE | 2020-14 | 5 BE-Overall | 1 | 1 | #####    | ##### |
| 14 | 2 BE | 2020-14 | 5 BE-Overall | 1 | 2 | #####    | ##### |
| 15 | 2 BE | 2020-14 | 5 BE-Overall | 1 | 3 | #####    | ##### |
| 16 | 2 BE | 2020-14 | 5 BE-Overall | 1 | 4 | #####    | ##### |
| 17 | 2 BE | 2020-14 | 5 BE-Overall | 1 | 5 | #####    | ##### |
| 18 | 2 BE | 2020-14 | 5 BE-Overall | 2 | 1 | #####    | ##### |
| 19 | 2 BE | 2020-14 | 5 BE-Overall | 2 | 2 | #####    | ##### |
| 20 | 2 BE | 2020-14 | 5 BE-Overall | 2 | 3 | #####    | ##### |
| 21 | 2 BE | 2020-14 | 5 BE-Overall | 2 | 4 | #####    | ##### |
| 22 | 2 BE | 2020-14 | 5 BE-Overall | 2 | 5 | #####    | ##### |
| 23 | 2 BE | 2020-14 | 5 BE-Overall | 2 | 5 | #####    | ##### |
| 24 | 2 BE | 2020-14 | 5 BE-Overall | 3 | 1 | #####    | ##### |
| 25 | 2 BE | 2020-14 | 5 BE-Overall | 3 | 2 | #####    | ##### |
| 26 | 2 BE | 2020-14 | 5 BE-Overall | 3 | 3 | #####    | ##### |
| 27 | 2 BE | 2020-14 | 5 BE-Overall | 3 | 4 | 1.064572 | ##### |
| 28 | 2 BE | 2020-14 | 5 BE-Overall | 3 | 5 | #####    | ##### |
| 29 | 2 BE | 2020-14 | 5 BE-Walloni | 1 | 1 | #####    | ##### |
| 30 | 2 BE | 2020-14 | 5 BE-Walloni | 1 | 2 | #####    | ##### |
| 31 | 2 BE | 2020-14 | 5 BE-Walloni | 1 | 3 | #####    | ##### |
| 32 | 2 BE | 2020-14 | 5 BE-Walloni | 1 | 4 | #####    | ##### |
| 33 | 2 BE | 2020-14 | 5 BE-Walloni | 1 | 5 | #####    | ##### |
| 34 | 2 BE | 2020-14 | 5 BE-Walloni | 2 | 1 | #####    | ##### |
| 35 | 2 BE | 2020-14 | 5 BE-Walloni | 2 | 2 | #####    | ##### |
| 36 | 2 BE | 2020-14 | 5 BE-Walloni | 2 | 3 | #####    | ##### |
| 37 | 2 BE | 2020-14 | 5 BE-Walloni | 2 | 4 | #####    | ##### |
| 38 | 2 BE | 2020-14 | 5 BE-Walloni | 2 | 5 | #####    | ##### |
| 39 | 2 BE | 2020-14 | 5 BE-Walloni | 3 | 1 | #####    | ##### |
| 40 | 2 BE | 2020-14 | 5 BE-Walloni | 3 | 2 | #####    | ##### |
| 41 | 2 BE | 2020-14 | 5 BE-Walloni | 3 | 3 | #####    | ##### |
| 42 | 2 BE | 2020-14 | 5 BE-Walloni | 3 | 4 | #####    | ##### |
| 43 | 2 BE | 2020-14 | 5 BE-Walloni | 3 | 5 | #####    | ##### |
| 44 | 2 BE | 2020-15 | 1 BE-Brussel | 1 | 1 | 2.51618  | ##### |
| 45 | 2 BE | 2020-15 | 1 BE-Brussel | 1 | 2 | 2.545919 | ##### |
| 46 | 2 BE | 2020-15 | 1 BE-Brussel | 1 | 3 | 2.854022 | ##### |
| 47 | 2 BE | 2020-15 | 1 BE-Brussel | 1 | 4 | 2.402685 | ##### |
| 48 | 2 BE | 2020-15 | 1 BE-Brussel | 1 | 5 | 1.5      | ##### |
| 49 | 2 BE | 2020-15 | 1 BE-Brussel | 2 | 1 | 2.857482 | ##### |
| 50 | 2 BE | 2020-15 | 1 BE-Brussel | 2 | 2 | 3.072464 | ##### |
| 51 | 2 BE | 2020-15 | 1 BE-Brussel | 2 | 3 | 3.147541 | ##### |
| 52 | 2 BE | 2020-15 | 1 BE-Brussel | 2 | 4 | 3.025316 | ##### |
| 53 | 2 BE | 2020-15 | 1 BE-Brussel | 2 | 5 | 1.5      | ##### |
| 54 | 2 BE | 2020-15 | 1 BE-Brussel | 3 | 1 | 2.08526  | ##### |
| 55 | 2 BE | 2020-15 | 1 BE-Brussel | 3 | 2 | 1.833333 | ##### |
| 56 | 2 BE | 2020-15 | 1 BE-Brussel | 3 | 3 | 2.465116 | ##### |
| 57 | 2 BE | 2020-15 | 1 BE-Brussel | 3 | 4 | 1.865385 | ##### |
| 58 | 2 BE | 2020-15 | 1 BE-Brussel | 3 | 5 | 1.5      | ##### |
| 59 | 2 BE | 2020-15 | 1 BE-Flander | 1 | 1 | 3.738363 | ##### |
| 60 | 2 BE | 2020-15 | 1 BE-Flander | 1 | 1 | 3.738363 | ##### |

|    |      |         |              |   |   |          |          |  |
|----|------|---------|--------------|---|---|----------|----------|--|
| 1  |      |         |              |   |   |          |          |  |
| 2  |      |         |              |   |   |          |          |  |
| 3  | 2 BE | 2020-15 | 1 BE-Flander | 1 | 2 | 3.879502 | #####    |  |
| 4  | 2 BE | 2020-15 | 1 BE-Flander | 1 | 3 | 5.640737 | #####    |  |
| 5  | 2 BE | 2020-15 | 1 BE-Flander | 1 | 4 | 3.211251 | #####    |  |
| 6  | 2 BE | 2020-15 | 1 BE-Flander | 1 | 5 | 1.900626 | #####    |  |
| 7  | 2 BE | 2020-15 | 1 BE-Flander | 2 | 1 | 3.650954 | #####    |  |
| 8  | 2 BE | 2020-15 | 1 BE-Flander | 2 | 2 | 3.872549 | #####    |  |
| 9  | 2 BE | 2020-15 | 1 BE-Flander | 2 | 3 | 5.4      | #####    |  |
| 10 | 2 BE | 2020-15 | 1 BE-Flander | 2 | 4 | 3.25431  | #####    |  |
| 11 | 2 BE | 2020-15 | 1 BE-Flander | 2 | 5 | 1.75     | #####    |  |
| 12 | 2 BE | 2020-15 | 1 BE-Flander | 3 | 1 | 3.835303 | #####    |  |
| 13 | 2 BE | 2020-15 | 1 BE-Flander | 3 | 2 | 3.885714 | #####    |  |
| 14 | 2 BE | 2020-15 | 1 BE-Flander | 3 | 3 | 5.946429 | #####    |  |
| 15 | 2 BE | 2020-15 | 1 BE-Flander | 3 | 4 | 3.169118 | #####    |  |
| 16 | 2 BE | 2020-15 | 1 BE-Flander | 3 | 5 | 2.095238 | #####    |  |
| 17 | 2 BE | 2020-15 | 1 BE-Overall | 1 | 1 | 3.252375 | 0.106791 |  |
| 18 | 2 BE | 2020-15 | 1 BE-Overall | 1 | 2 | 3.305508 | #####    |  |
| 19 | 2 BE | 2020-15 | 1 BE-Overall | 1 | 3 | 4.578104 | #####    |  |
| 20 | 2 BE | 2020-15 | 1 BE-Overall | 1 | 4 | 2.897857 | #####    |  |
| 21 | 2 BE | 2020-15 | 1 BE-Overall | 1 | 5 | 1.655074 | #####    |  |
| 22 | 2 BE | 2020-15 | 1 BE-Overall | 2 | 1 | 3.217678 | #####    |  |
| 23 | 2 BE | 2020-15 | 1 BE-Overall | 2 | 2 | 3.375895 | #####    |  |
| 24 | 2 BE | 2020-15 | 1 BE-Overall | 2 | 3 | 4.579643 | #####    |  |
| 25 | 2 BE | 2020-15 | 1 BE-Overall | 2 | 4 | 2.912715 | #####    |  |
| 26 | 2 BE | 2020-15 | 1 BE-Overall | 2 | 5 | 1.453947 | #####    |  |
| 27 | 2 BE | 2020-15 | 1 BE-Overall | 3 | 1 | 3.291551 | #####    |  |
| 28 | 2 BE | 2020-15 | 1 BE-Overall | 3 | 2 | 3.236795 | #####    |  |
| 29 | 2 BE | 2020-15 | 1 BE-Overall | 3 | 3 | 4.576281 | #####    |  |
| 30 | 2 BE | 2020-15 | 1 BE-Overall | 3 | 4 | 2.881874 | #####    |  |
| 31 | 2 BE | 2020-15 | 1 BE-Overall | 3 | 5 | 1.911214 | #####    |  |
| 32 | 2 BE | 2020-15 | 1 BE-Walloni | 1 | 1 | 2.674474 | #####    |  |
| 33 | 2 BE | 2020-15 | 1 BE-Walloni | 1 | 2 | 2.729461 | #####    |  |
| 34 | 2 BE | 2020-15 | 1 BE-Walloni | 1 | 3 | 3.741294 | #####    |  |
| 35 | 2 BE | 2020-15 | 1 BE-Walloni | 1 | 4 | 2.461846 | #####    |  |
| 36 | 2 BE | 2020-15 | 1 BE-Walloni | 1 | 5 | 1.19411  | #####    |  |
| 37 | 2 BE | 2020-15 | 1 BE-Walloni | 2 | 1 | 2.605104 | #####    |  |
| 38 | 2 BE | 2020-15 | 1 BE-Walloni | 2 | 2 | 2.807407 | #####    |  |
| 39 | 2 BE | 2020-15 | 1 BE-Walloni | 2 | 3 | 3.929245 | #####    |  |
| 40 | 2 BE | 2020-15 | 1 BE-Walloni | 2 | 4 | 2.338624 | #####    |  |
| 41 | 2 BE | 2020-15 | 1 BE-Walloni | 2 | 5 | #####    | #####    |  |
| 42 | 2 BE | 2020-15 | 1 BE-Walloni | 3 | 1 | 2.752063 | #####    |  |
| 43 | 2 BE | 2020-15 | 1 BE-Walloni | 3 | 2 | 2.652174 | #####    |  |
| 44 | 2 BE | 2020-15 | 1 BE-Walloni | 3 | 3 | 3.553191 | #####    |  |
| 45 | 2 BE | 2020-15 | 1 BE-Walloni | 3 | 4 | 2.631579 | #####    |  |
| 46 | 2 BE | 2020-15 | 1 BE-Walloni | 3 | 5 | 1.633803 | #####    |  |
| 47 | 2 BE | 2020-15 | 2 BE-Brussel | 1 | 1 | 1.214784 | #####    |  |
| 48 | 2 BE | 2020-15 | 2 BE-Brussel | 1 | 2 | 1.739885 | #####    |  |
| 49 | 2 BE | 2020-15 | 2 BE-Brussel | 1 | 3 | 1.24973  | #####    |  |
| 50 | 2 BE | 2020-15 | 2 BE-Brussel | 1 | 4 | 1.02683  | #####    |  |
| 51 | 2 BE | 2020-15 | 2 BE-Brussel | 1 | 5 | #####    | #####    |  |
| 52 | 2 BE | 2020-15 | 2 BE-Brussel | 2 | 1 | 1.3651   | #####    |  |
| 53 | 2 BE | 2020-15 | 2 BE-Brussel | 2 | 2 | 2.027778 | #####    |  |
| 54 | 2 BE | 2020-15 | 2 BE-Brussel | 2 | 3 | 1.343511 | #####    |  |
| 55 | 2 BE | 2020-15 | 2 BE-Brussel | 2 | 4 | 1.304348 | #####    |  |
| 56 | 2 BE | 2020-15 | 2 BE-Brussel | 2 | 5 | #####    | #####    |  |
| 57 | 2 BE | 2020-15 | 2 BE-Brussel | 3 | 1 | 1.023802 | #####    |  |
| 58 | 2 BE | 2020-15 | 2 BE-Brussel | 3 | 2 | 1.333333 | #####    |  |
| 59 | 2 BE | 2020-15 | 2 BE-Brussel | 3 |   |          |          |  |
| 60 | 2 BE | 2020-15 | 2 BE-Brussel | 3 |   |          |          |  |

|    |      |         |              |   |   |          |       |  |
|----|------|---------|--------------|---|---|----------|-------|--|
| 1  |      |         |              |   |   |          |       |  |
| 2  |      |         |              |   |   |          |       |  |
| 3  | 2 BE | 2020-15 | 2 BE-Brussel | 3 | 3 | 1.12766  | ##### |  |
| 4  | 2 BE | 2020-15 | 2 BE-Brussel | 3 | 4 | #####    | ##### |  |
| 5  | 2 BE | 2020-15 | 2 BE-Brussel | 3 | 5 | #####    | ##### |  |
| 6  | 2 BE | 2020-15 | 2 BE-Flander | 1 | 1 | 1.429162 | ##### |  |
| 7  | 2 BE | 2020-15 | 2 BE-Flander | 1 | 2 | 2.153136 | ##### |  |
| 8  | 2 BE | 2020-15 | 2 BE-Flander | 1 | 3 | 1.737286 | ##### |  |
| 9  | 2 BE | 2020-15 | 2 BE-Flander | 1 | 4 | 1.145339 | ##### |  |
| 10 | 2 BE | 2020-15 | 2 BE-Flander | 1 | 5 | #####    | ##### |  |
| 11 | 2 BE | 2020-15 | 2 BE-Flander | 2 | 1 | 1.484681 | ##### |  |
| 12 | 2 BE | 2020-15 | 2 BE-Flander | 2 | 2 | 2.230088 | ##### |  |
| 13 | 2 BE | 2020-15 | 2 BE-Flander | 2 | 3 | 1.786047 | ##### |  |
| 14 | 2 BE | 2020-15 | 2 BE-Flander | 2 | 4 | 1.269531 | ##### |  |
| 15 | 2 BE | 2020-15 | 2 BE-Flander | 2 | 5 | #####    | ##### |  |
| 16 | 2 BE | 2020-15 | 2 BE-Flander | 3 | 1 | 1.368246 | ##### |  |
| 17 | 2 BE | 2020-15 | 2 BE-Flander | 3 | 2 | 2.081081 | ##### |  |
| 18 | 2 BE | 2020-15 | 2 BE-Flander | 3 | 3 | 1.676923 | ##### |  |
| 19 | 2 BE | 2020-15 | 2 BE-Flander | 3 | 4 | 1.026144 | ##### |  |
| 20 | 2 BE | 2020-15 | 2 BE-Flander | 3 | 5 | #####    | ##### |  |
| 21 | 2 BE | 2020-15 | 2 BE-Overall | 1 | 1 | 1.384821 | ##### |  |
| 22 | 2 BE | 2020-15 | 2 BE-Overall | 1 | 2 | 2.054504 | ##### |  |
| 23 | 2 BE | 2020-15 | 2 BE-Overall | 1 | 3 | 1.630358 | ##### |  |
| 24 | 2 BE | 2020-15 | 2 BE-Overall | 1 | 4 | 1.131781 | ##### |  |
| 25 | 2 BE | 2020-15 | 2 BE-Overall | 1 | 5 | #####    | ##### |  |
| 26 | 2 BE | 2020-15 | 2 BE-Overall | 2 | 1 | 1.441871 | ##### |  |
| 27 | 2 BE | 2020-15 | 2 BE-Overall | 2 | 2 | 2.146381 | ##### |  |
| 28 | 2 BE | 2020-15 | 2 BE-Overall | 2 | 3 | 1.724596 | ##### |  |
| 29 | 2 BE | 2020-15 | 2 BE-Overall | 2 | 4 | 1.237789 | ##### |  |
| 30 | 2 BE | 2020-15 | 2 BE-Overall | 2 | 5 | #####    | ##### |  |
| 31 | 2 BE | 2020-15 | 2 BE-Overall | 3 | 1 | 1.32113  | ##### |  |
| 32 | 2 BE | 2020-15 | 2 BE-Overall | 3 | 2 | 1.963611 | ##### |  |
| 33 | 2 BE | 2020-15 | 2 BE-Overall | 3 | 3 | 1.521744 | ##### |  |
| 34 | 2 BE | 2020-15 | 2 BE-Overall | 3 | 4 | 1.018169 | ##### |  |
| 35 | 2 BE | 2020-15 | 2 BE-Overall | 3 | 5 | #####    | ##### |  |
| 36 | 2 BE | 2020-15 | 2 BE-Overall | 3 | 5 | #####    | ##### |  |
| 37 | 2 BE | 2020-15 | 2 BE-Walloni | 1 | 1 | 1.368721 | ##### |  |
| 38 | 2 BE | 2020-15 | 2 BE-Walloni | 1 | 2 | 2.01412  | ##### |  |
| 39 | 2 BE | 2020-15 | 2 BE-Walloni | 1 | 3 | 1.640086 | ##### |  |
| 40 | 2 BE | 2020-15 | 2 BE-Walloni | 1 | 4 | 1.138543 | ##### |  |
| 41 | 2 BE | 2020-15 | 2 BE-Walloni | 1 | 5 | #####    | ##### |  |
| 42 | 2 BE | 2020-15 | 2 BE-Walloni | 2 | 1 | 1.397161 | ##### |  |
| 43 | 2 BE | 2020-15 | 2 BE-Walloni | 2 | 2 | 2.070922 | ##### |  |
| 44 | 2 BE | 2020-15 | 2 BE-Walloni | 2 | 3 | 1.821577 | ##### |  |
| 45 | 2 BE | 2020-15 | 2 BE-Walloni | 2 | 4 | 1.170616 | ##### |  |
| 46 | 2 BE | 2020-15 | 2 BE-Walloni | 2 | 5 | #####    | ##### |  |
| 47 | 2 BE | 2020-15 | 2 BE-Walloni | 3 | 1 | 1.33747  | ##### |  |
| 48 | 2 BE | 2020-15 | 2 BE-Walloni | 3 | 2 | 1.96     | ##### |  |
| 49 | 2 BE | 2020-15 | 2 BE-Walloni | 3 | 3 | 1.463636 | ##### |  |
| 50 | 2 BE | 2020-15 | 2 BE-Walloni | 3 | 4 | 1.09434  | ##### |  |
| 51 | 2 BE | 2020-15 | 2 BE-Walloni | 3 | 5 | #####    | ##### |  |
| 52 | 2 BE | 2020-15 | 3 BE-Brussel | 1 | 1 | 0        | 0     |  |
| 53 | 2 BE | 2020-15 | 3 BE-Brussel | 1 | 2 | 0        | 0     |  |
| 54 | 2 BE | 2020-15 | 3 BE-Brussel | 1 | 3 | 0        | 0     |  |
| 55 | 2 BE | 2020-15 | 3 BE-Brussel | 1 | 4 | 0        | 0     |  |
| 56 | 2 BE | 2020-15 | 3 BE-Brussel | 1 | 5 | 0        | 0     |  |
| 57 | 2 BE | 2020-15 | 3 BE-Brussel | 2 | 1 | 0        | 0     |  |
| 58 | 2 BE | 2020-15 | 3 BE-Brussel | 2 | 2 | 0        | 0     |  |
| 59 | 2 BE | 2020-15 | 3 BE-Brussel | 2 | 3 | 0        | 0     |  |
| 60 | 2 BE | 2020-15 | 3 BE-Brussel | 2 | 3 | 0        | 0     |  |

|    |      |         |              |   |   |          |       |  |
|----|------|---------|--------------|---|---|----------|-------|--|
| 1  |      |         |              |   |   |          |       |  |
| 2  |      |         |              |   |   |          |       |  |
| 3  | 2 BE | 2020-15 | 3 BE-Brussel | 2 | 4 | 0        | 0     |  |
| 4  | 2 BE | 2020-15 | 3 BE-Brussel | 2 | 5 | 0        | 0     |  |
| 5  | 2 BE | 2020-15 | 3 BE-Brussel | 3 | 1 | 0        | 0     |  |
| 6  | 2 BE | 2020-15 | 3 BE-Brussel | 3 | 2 | 0        | 0     |  |
| 7  | 2 BE | 2020-15 | 3 BE-Brussel | 3 | 3 | 0        | 0     |  |
| 8  | 2 BE | 2020-15 | 3 BE-Brussel | 3 | 4 | 0        | 0     |  |
| 9  | 2 BE | 2020-15 | 3 BE-Brussel | 3 | 5 | 0        | 0     |  |
| 10 | 2 BE | 2020-15 | 3 BE-Flander | 1 | 1 | 0        | 0     |  |
| 11 | 2 BE | 2020-15 | 3 BE-Flander | 1 | 2 | 0        | 0     |  |
| 12 | 2 BE | 2020-15 | 3 BE-Flander | 1 | 3 | 0        | 0     |  |
| 13 | 2 BE | 2020-15 | 3 BE-Flander | 1 | 4 | 0        | 0     |  |
| 14 | 2 BE | 2020-15 | 3 BE-Flander | 1 | 5 | 0        | 0     |  |
| 15 | 2 BE | 2020-15 | 3 BE-Flander | 2 | 1 | 0        | 0     |  |
| 16 | 2 BE | 2020-15 | 3 BE-Flander | 2 | 2 | 0        | 0     |  |
| 17 | 2 BE | 2020-15 | 3 BE-Flander | 2 | 3 | 0        | 0     |  |
| 18 | 2 BE | 2020-15 | 3 BE-Flander | 2 | 4 | 0        | 0     |  |
| 19 | 2 BE | 2020-15 | 3 BE-Flander | 2 | 5 | 0        | 0     |  |
| 20 | 2 BE | 2020-15 | 3 BE-Flander | 3 | 1 | 0        | 0     |  |
| 21 | 2 BE | 2020-15 | 3 BE-Flander | 3 | 2 | 0        | 0     |  |
| 22 | 2 BE | 2020-15 | 3 BE-Flander | 3 | 3 | 0        | 0     |  |
| 23 | 2 BE | 2020-15 | 3 BE-Flander | 3 | 4 | 0        | 0     |  |
| 24 | 2 BE | 2020-15 | 3 BE-Flander | 3 | 5 | 0        | 0     |  |
| 25 | 2 BE | 2020-15 | 3 BE-Flander | 3 | 5 | 0        | 0     |  |
| 26 | 2 BE | 2020-15 | 3 BE-Overall | 1 | 1 | 0        | 0     |  |
| 27 | 2 BE | 2020-15 | 3 BE-Overall | 1 | 2 | 0        | 0     |  |
| 28 | 2 BE | 2020-15 | 3 BE-Overall | 1 | 3 | 0        | 0     |  |
| 29 | 2 BE | 2020-15 | 3 BE-Overall | 1 | 4 | 0        | 0     |  |
| 30 | 2 BE | 2020-15 | 3 BE-Overall | 1 | 5 | 0        | 0     |  |
| 31 | 2 BE | 2020-15 | 3 BE-Overall | 2 | 1 | 0        | 0     |  |
| 32 | 2 BE | 2020-15 | 3 BE-Overall | 2 | 2 | 0        | 0     |  |
| 33 | 2 BE | 2020-15 | 3 BE-Overall | 2 | 3 | 0        | 0     |  |
| 34 | 2 BE | 2020-15 | 3 BE-Overall | 2 | 4 | 0        | 0     |  |
| 35 | 2 BE | 2020-15 | 3 BE-Overall | 2 | 5 | 0        | 0     |  |
| 36 | 2 BE | 2020-15 | 3 BE-Overall | 3 | 1 | 0        | 0     |  |
| 37 | 2 BE | 2020-15 | 3 BE-Overall | 3 | 2 | 0        | 0     |  |
| 38 | 2 BE | 2020-15 | 3 BE-Overall | 3 | 3 | 0        | 0     |  |
| 39 | 2 BE | 2020-15 | 3 BE-Overall | 3 | 4 | 0        | 0     |  |
| 40 | 2 BE | 2020-15 | 3 BE-Overall | 3 | 5 | 0        | 0     |  |
| 41 | 2 BE | 2020-15 | 3 BE-Walloni | 1 | 1 | 0        | 0     |  |
| 42 | 2 BE | 2020-15 | 3 BE-Walloni | 1 | 2 | 0        | 0     |  |
| 43 | 2 BE | 2020-15 | 3 BE-Walloni | 1 | 3 | 0        | 0     |  |
| 44 | 2 BE | 2020-15 | 3 BE-Walloni | 1 | 4 | 0        | 0     |  |
| 45 | 2 BE | 2020-15 | 3 BE-Walloni | 1 | 5 | 0        | 0     |  |
| 46 | 2 BE | 2020-15 | 3 BE-Walloni | 2 | 1 | 0        | 0     |  |
| 47 | 2 BE | 2020-15 | 3 BE-Walloni | 2 | 2 | 0        | 0     |  |
| 48 | 2 BE | 2020-15 | 3 BE-Walloni | 2 | 3 | 0        | 0     |  |
| 49 | 2 BE | 2020-15 | 3 BE-Walloni | 2 | 4 | 0        | 0     |  |
| 50 | 2 BE | 2020-15 | 3 BE-Walloni | 2 | 5 | 0        | 0     |  |
| 51 | 2 BE | 2020-15 | 3 BE-Walloni | 3 | 1 | 0        | 0     |  |
| 52 | 2 BE | 2020-15 | 3 BE-Walloni | 3 | 2 | 0        | 0     |  |
| 53 | 2 BE | 2020-15 | 3 BE-Walloni | 3 | 3 | 0        | 0     |  |
| 54 | 2 BE | 2020-15 | 3 BE-Walloni | 3 | 4 | 0        | 0     |  |
| 55 | 2 BE | 2020-15 | 3 BE-Walloni | 3 | 5 | 0        | 0     |  |
| 56 | 2 BE | 2020-15 | 4 BE-Brussel | 1 | 1 | #####    | ##### |  |
| 57 | 2 BE | 2020-15 | 4 BE-Brussel | 1 | 2 | #####    | ##### |  |
| 58 | 2 BE | 2020-15 | 4 BE-Brussel | 1 | 3 | 1.250012 | ##### |  |
| 59 | 2 BE | 2020-15 | 4 BE-Brussel | 1 | 4 | #####    | ##### |  |
| 60 | 2 BE | 2020-15 | 4 BE-Brussel | 1 | 4 | #####    | ##### |  |

|    |      |         |              |   |   |          |       |  |
|----|------|---------|--------------|---|---|----------|-------|--|
| 1  |      |         |              |   |   |          |       |  |
| 2  |      |         |              |   |   |          |       |  |
| 3  | 2 BE | 2020-15 | 4 BE-Brussel | 1 | 5 | #####    | ##### |  |
| 4  | 2 BE | 2020-15 | 4 BE-Brussel | 2 | 1 | #####    | ##### |  |
| 5  | 2 BE | 2020-15 | 4 BE-Brussel | 2 | 2 | #####    | ##### |  |
| 6  | 2 BE | 2020-15 | 4 BE-Brussel | 2 | 3 | 1.27907  | ##### |  |
| 7  | 2 BE | 2020-15 | 4 BE-Brussel | 2 | 4 | #####    | ##### |  |
| 8  | 2 BE | 2020-15 | 4 BE-Brussel | 2 | 5 | #####    | ##### |  |
| 9  | 2 BE | 2020-15 | 4 BE-Brussel | 3 | 1 | #####    | ##### |  |
| 10 | 2 BE | 2020-15 | 4 BE-Brussel | 3 | 2 | 0        | 0     |  |
| 11 | 2 BE | 2020-15 | 4 BE-Brussel | 3 | 3 | 1.212766 | ##### |  |
| 12 | 2 BE | 2020-15 | 4 BE-Brussel | 3 | 4 | #####    | ##### |  |
| 13 | 2 BE | 2020-15 | 4 BE-Brussel | 3 | 5 | 0        | 0     |  |
| 14 | 2 BE | 2020-15 | 4 BE-Flander | 1 | 1 | 1.706705 | ##### |  |
| 15 | 2 BE | 2020-15 | 4 BE-Flander | 1 | 2 | 1.07146  | ##### |  |
| 16 | 2 BE | 2020-15 | 4 BE-Flander | 1 | 3 | 3.369425 | ##### |  |
| 17 | 2 BE | 2020-15 | 4 BE-Flander | 1 | 4 | 1.4997   | ##### |  |
| 18 | 2 BE | 2020-15 | 4 BE-Flander | 1 | 5 | #####    | ##### |  |
| 19 | 2 BE | 2020-15 | 4 BE-Flander | 2 | 1 | 1.46076  | ##### |  |
| 20 | 2 BE | 2020-15 | 4 BE-Flander | 2 | 2 | #####    | ##### |  |
| 21 | 2 BE | 2020-15 | 4 BE-Flander | 2 | 3 | 2.682464 | ##### |  |
| 22 | 2 BE | 2020-15 | 4 BE-Flander | 2 | 4 | 1.46875  | ##### |  |
| 23 | 2 BE | 2020-15 | 4 BE-Flander | 2 | 5 | #####    | ##### |  |
| 24 | 2 BE | 2020-15 | 4 BE-Flander | 3 | 1 | 1.968822 | ##### |  |
| 25 | 2 BE | 2020-15 | 4 BE-Flander | 3 | 2 | 1.227273 | ##### |  |
| 26 | 2 BE | 2020-15 | 4 BE-Flander | 3 | 3 | 4.179104 | ##### |  |
| 27 | 2 BE | 2020-15 | 4 BE-Flander | 3 | 4 | 1.530201 | ##### |  |
| 28 | 2 BE | 2020-15 | 4 BE-Flander | 3 | 5 | #####    | ##### |  |
| 29 | 2 BE | 2020-15 | 4 BE-Overall | 1 | 1 | 1.299418 | ##### |  |
| 30 | 2 BE | 2020-15 | 4 BE-Overall | 1 | 2 | #####    | ##### |  |
| 31 | 2 BE | 2020-15 | 4 BE-Overall | 1 | 3 | 2.436155 | ##### |  |
| 32 | 2 BE | 2020-15 | 4 BE-Overall | 1 | 4 | 1.202864 | ##### |  |
| 33 | 2 BE | 2020-15 | 4 BE-Overall | 1 | 5 | #####    | ##### |  |
| 34 | 2 BE | 2020-15 | 4 BE-Overall | 2 | 1 | 1.135362 | ##### |  |
| 35 | 2 BE | 2020-15 | 4 BE-Overall | 2 | 2 | #####    | ##### |  |
| 36 | 2 BE | 2020-15 | 4 BE-Overall | 2 | 3 | 2.014907 | ##### |  |
| 37 | 2 BE | 2020-15 | 4 BE-Overall | 2 | 4 | 1.152394 | ##### |  |
| 38 | 2 BE | 2020-15 | 4 BE-Overall | 2 | 5 | #####    | ##### |  |
| 39 | 2 BE | 2020-15 | 4 BE-Overall | 3 | 1 | 1.478956 | ##### |  |
| 40 | 2 BE | 2020-15 | 4 BE-Overall | 3 | 2 | #####    | ##### |  |
| 41 | 2 BE | 2020-15 | 4 BE-Overall | 3 | 3 | 2.909616 | ##### |  |
| 42 | 2 BE | 2020-15 | 4 BE-Overall | 3 | 4 | 1.25811  | ##### |  |
| 43 | 2 BE | 2020-15 | 4 BE-Overall | 3 | 5 | #####    | ##### |  |
| 44 | 2 BE | 2020-15 | 4 BE-Walloni | 1 | 1 | #####    | ##### |  |
| 45 | 2 BE | 2020-15 | 4 BE-Walloni | 1 | 2 | #####    | ##### |  |
| 46 | 2 BE | 2020-15 | 4 BE-Walloni | 1 | 3 | 1.466793 | ##### |  |
| 47 | 2 BE | 2020-15 | 4 BE-Walloni | 1 | 4 | #####    | ##### |  |
| 48 | 2 BE | 2020-15 | 4 BE-Walloni | 1 | 5 | #####    | ##### |  |
| 49 | 2 BE | 2020-15 | 4 BE-Walloni | 2 | 1 | 0.65786  | ##### |  |
| 50 | 2 BE | 2020-15 | 4 BE-Walloni | 2 | 2 | #####    | ##### |  |
| 51 | 2 BE | 2020-15 | 4 BE-Walloni | 2 | 3 | 1.2103   | ##### |  |
| 52 | 2 BE | 2020-15 | 4 BE-Walloni | 2 | 4 | #####    | ##### |  |
| 53 | 2 BE | 2020-15 | 4 BE-Walloni | 2 | 5 | 0        | 0     |  |
| 54 | 2 BE | 2020-15 | 4 BE-Walloni | 3 | 1 | #####    | ##### |  |
| 55 | 2 BE | 2020-15 | 4 BE-Walloni | 3 | 2 | #####    | ##### |  |
| 56 | 2 BE | 2020-15 | 4 BE-Walloni | 3 | 3 | 1.716981 | ##### |  |
| 57 | 2 BE | 2020-15 | 4 BE-Walloni | 3 | 4 | 1        | ##### |  |
| 58 | 2 BE | 2020-15 | 4 BE-Walloni | 3 | 5 | #####    | ##### |  |
| 59 | 2 BE | 2020-15 | 4 BE-Walloni | 3 |   |          |       |  |
| 60 | 2 BE | 2020-15 | 4 BE-Walloni | 3 |   |          |       |  |

|    |      |         |              |   |   |          |       |
|----|------|---------|--------------|---|---|----------|-------|
| 1  |      |         |              |   |   |          |       |
| 2  |      |         |              |   |   |          |       |
| 3  | 2 BE | 2020-15 | 5 BE-Brussel | 1 | 1 | #####    | ##### |
| 4  | 2 BE | 2020-15 | 5 BE-Brussel | 1 | 2 | #####    | ##### |
| 5  | 2 BE | 2020-15 | 5 BE-Brussel | 1 | 3 | #####    | ##### |
| 6  | 2 BE | 2020-15 | 5 BE-Brussel | 1 | 4 | #####    | ##### |
| 7  | 2 BE | 2020-15 | 5 BE-Brussel | 1 | 5 | #####    | ##### |
| 8  | 2 BE | 2020-15 | 5 BE-Brussel | 2 | 1 | #####    | ##### |
| 9  | 2 BE | 2020-15 | 5 BE-Brussel | 2 | 2 | 0.48     | ##### |
| 10 | 2 BE | 2020-15 | 5 BE-Brussel | 2 | 3 | #####    | ##### |
| 11 | 2 BE | 2020-15 | 5 BE-Brussel | 2 | 4 | #####    | ##### |
| 12 | 2 BE | 2020-15 | 5 BE-Brussel | 2 | 5 | 0.74     | ##### |
| 13 | 2 BE | 2020-15 | 5 BE-Brussel | 3 | 1 | #####    | ##### |
| 14 | 2 BE | 2020-15 | 5 BE-Brussel | 3 | 2 | #####    | ##### |
| 15 | 2 BE | 2020-15 | 5 BE-Brussel | 3 | 3 | #####    | ##### |
| 16 | 2 BE | 2020-15 | 5 BE-Brussel | 3 | 4 | #####    | ##### |
| 17 | 2 BE | 2020-15 | 5 BE-Brussel | 3 | 5 | 1        | ##### |
| 18 | 2 BE | 2020-15 | 5 BE-Flander | 1 | 1 | #####    | ##### |
| 19 | 2 BE | 2020-15 | 5 BE-Flander | 1 | 2 | #####    | ##### |
| 20 | 2 BE | 2020-15 | 5 BE-Flander | 1 | 3 | 1.064105 | ##### |
| 21 | 2 BE | 2020-15 | 5 BE-Flander | 1 | 4 | #####    | ##### |
| 22 | 2 BE | 2020-15 | 5 BE-Flander | 1 | 5 | #####    | ##### |
| 23 | 2 BE | 2020-15 | 5 BE-Flander | 2 | 1 | #####    | ##### |
| 24 | 2 BE | 2020-15 | 5 BE-Flander | 2 | 2 | #####    | ##### |
| 25 | 2 BE | 2020-15 | 5 BE-Flander | 2 | 3 | 1.110132 | ##### |
| 26 | 2 BE | 2020-15 | 5 BE-Flander | 2 | 4 | #####    | ##### |
| 27 | 2 BE | 2020-15 | 5 BE-Flander | 2 | 5 | #####    | ##### |
| 28 | 2 BE | 2020-15 | 5 BE-Flander | 2 | 1 | #####    | ##### |
| 29 | 2 BE | 2020-15 | 5 BE-Flander | 3 | 2 | #####    | ##### |
| 30 | 2 BE | 2020-15 | 5 BE-Flander | 3 | 3 | 1        | ##### |
| 31 | 2 BE | 2020-15 | 5 BE-Flander | 3 | 4 | #####    | ##### |
| 32 | 2 BE | 2020-15 | 5 BE-Flander | 3 | 5 | 1.082353 | ##### |
| 33 | 2 BE | 2020-15 | 5 BE-Overall | 1 | 1 | #####    | ##### |
| 34 | 2 BE | 2020-15 | 5 BE-Overall | 1 | 2 | #####    | ##### |
| 35 | 2 BE | 2020-15 | 5 BE-Overall | 1 | 3 | #####    | ##### |
| 36 | 2 BE | 2020-15 | 5 BE-Overall | 1 | 4 | #####    | ##### |
| 37 | 2 BE | 2020-15 | 5 BE-Overall | 1 | 5 | #####    | ##### |
| 38 | 2 BE | 2020-15 | 5 BE-Overall | 2 | 1 | #####    | ##### |
| 39 | 2 BE | 2020-15 | 5 BE-Overall | 2 | 2 | #####    | ##### |
| 40 | 2 BE | 2020-15 | 5 BE-Overall | 2 | 3 | #####    | ##### |
| 41 | 2 BE | 2020-15 | 5 BE-Overall | 2 | 4 | #####    | ##### |
| 42 | 2 BE | 2020-15 | 5 BE-Overall | 2 | 5 | #####    | ##### |
| 43 | 2 BE | 2020-15 | 5 BE-Overall | 3 | 1 | #####    | ##### |
| 44 | 2 BE | 2020-15 | 5 BE-Overall | 3 | 2 | #####    | ##### |
| 45 | 2 BE | 2020-15 | 5 BE-Overall | 3 | 3 | #####    | ##### |
| 46 | 2 BE | 2020-15 | 5 BE-Overall | 3 | 4 | #####    | ##### |
| 47 | 2 BE | 2020-15 | 5 BE-Overall | 3 | 5 | #####    | ##### |
| 48 | 2 BE | 2020-15 | 5 BE-Overall | 3 | 1 | #####    | ##### |
| 49 | 2 BE | 2020-15 | 5 BE-Walloni | 1 | 1 | #####    | ##### |
| 50 | 2 BE | 2020-15 | 5 BE-Walloni | 1 | 2 | #####    | ##### |
| 51 | 2 BE | 2020-15 | 5 BE-Walloni | 1 | 3 | #####    | ##### |
| 52 | 2 BE | 2020-15 | 5 BE-Walloni | 1 | 4 | #####    | ##### |
| 53 | 2 BE | 2020-15 | 5 BE-Walloni | 1 | 5 | #####    | ##### |
| 54 | 2 BE | 2020-15 | 5 BE-Walloni | 2 | 1 | #####    | ##### |
| 55 | 2 BE | 2020-15 | 5 BE-Walloni | 2 | 2 | #####    | ##### |
| 56 | 2 BE | 2020-15 | 5 BE-Walloni | 2 | 3 | #####    | ##### |
| 57 | 2 BE | 2020-15 | 5 BE-Walloni | 2 | 4 | #####    | ##### |
| 58 | 2 BE | 2020-15 | 5 BE-Walloni | 2 | 5 | 0.35     | ##### |
| 59 | 2 BE | 2020-15 | 5 BE-Walloni | 3 | 1 | #####    | ##### |
| 60 | 2 BE | 2020-15 | 5 BE-Walloni | 3 | 1 | #####    | ##### |



|    |      |         |              |   |   |          |          |
|----|------|---------|--------------|---|---|----------|----------|
| 1  |      |         |              |   |   |          |          |
| 2  |      |         |              |   |   |          |          |
| 3  | 2 BE | 2020-15 | 5 BE-Walloni | 3 | 2 | #####    | #####    |
| 4  | 2 BE | 2020-15 | 5 BE-Walloni | 3 | 3 | 0.6      | #####    |
| 5  | 2 BE | 2020-15 | 5 BE-Walloni | 3 | 4 | #####    | #####    |
| 6  | 2 BE | 2020-15 | 5 BE-Walloni | 3 | 5 | #####    | #####    |
| 7  | 2 DE | 2020-12 | 1 DE-East    | 1 | 1 | 5.709477 | #####    |
| 8  | 2 DE | 2020-12 | 1 DE-East    | 1 | 2 | 6.428363 | 1.189688 |
| 9  | 2 DE | 2020-12 | 1 DE-East    | 1 | 3 | 7.630317 | #####    |
| 10 | 2 DE | 2020-12 | 1 DE-East    | 1 | 4 | 6.00468  | #####    |
| 11 | 2 DE | 2020-12 | 1 DE-East    | 1 | 5 | 2.871467 | #####    |
| 12 | 2 DE | 2020-12 | 1 DE-East    | 2 | 1 | 5.526105 | #####    |
| 13 | 2 DE | 2020-12 | 1 DE-East    | 2 | 2 | 5.045455 | #####    |
| 14 | 2 DE | 2020-12 | 1 DE-East    | 2 | 3 | 7.842105 | #####    |
| 15 | 2 DE | 2020-12 | 1 DE-East    | 2 | 4 | 5.964286 | 1.120927 |
| 16 | 2 DE | 2020-12 | 1 DE-East    | 2 | 5 | 2.916667 | #####    |
| 17 | 2 DE | 2020-12 | 1 DE-East    | 3 | 1 | 5.961652 | #####    |
| 18 | 2 DE | 2020-12 | 1 DE-East    | 3 | 2 | 7.454545 | 1.942948 |
| 19 | 2 DE | 2020-12 | 1 DE-East    | 3 | 3 | 7.368421 | 1.14886  |
| 20 | 2 DE | 2020-12 | 1 DE-East    | 3 | 4 | 6.083333 | 1.812326 |
| 21 | 2 DE | 2020-12 | 1 DE-East    | 3 | 5 | 2.8      | #####    |
| 22 | 2 DE | 2020-12 | 1 DE-North   | 1 | 1 | 5.309509 | #####    |
| 23 | 2 DE | 2020-12 | 1 DE-North   | 1 | 2 | 8.02454  | 1.237623 |
| 24 | 2 DE | 2020-12 | 1 DE-North   | 1 | 3 | 6.613222 | 1.061036 |
| 25 | 2 DE | 2020-12 | 1 DE-North   | 1 | 4 | 6.006844 | #####    |
| 26 | 2 DE | 2020-12 | 1 DE-North   | 1 | 5 | 2.26929  | #####    |
| 27 | 2 DE | 2020-12 | 1 DE-North   | 2 | 1 | 4.377651 | #####    |
| 28 | 2 DE | 2020-12 | 1 DE-North   | 2 | 2 | 6.45     | 1.856819 |
| 29 | 2 DE | 2020-12 | 1 DE-North   | 2 | 3 | 6.757576 | 1.268487 |
| 30 | 2 DE | 2020-12 | 1 DE-North   | 2 | 4 | 4.666667 | #####    |
| 31 | 2 DE | 2020-12 | 1 DE-North   | 2 | 5 | 2.0625   | #####    |
| 32 | 2 DE | 2020-12 | 1 DE-North   | 3 | 1 | 6.687894 | #####    |
| 33 | 2 DE | 2020-12 | 1 DE-North   | 3 | 2 | 9.25     | 1.578758 |
| 34 | 2 DE | 2020-12 | 1 DE-North   | 3 | 3 | 6.428571 | 1.792134 |
| 35 | 2 DE | 2020-12 | 1 DE-North   | 3 | 4 | 7.6875   | 1.731517 |
| 36 | 2 DE | 2020-12 | 1 DE-North   | 3 | 5 | 2.857143 | #####    |
| 37 | 2 DE | 2020-12 | 1 DE-Overall | 1 | 1 | 5.084788 | #####    |
| 38 | 2 DE | 2020-12 | 1 DE-Overall | 1 | 2 | 6.09796  | #####    |
| 39 | 2 DE | 2020-12 | 1 DE-Overall | 1 | 3 | 6.283479 | #####    |
| 40 | 2 DE | 2020-12 | 1 DE-Overall | 1 | 4 | 5.619202 | #####    |
| 41 | 2 DE | 2020-12 | 1 DE-Overall | 1 | 5 | 2.488443 | #####    |
| 42 | 2 DE | 2020-12 | 1 DE-Overall | 2 | 1 | 4.665049 | #####    |
| 43 | 2 DE | 2020-12 | 1 DE-Overall | 2 | 2 | 6.212699 | #####    |
| 44 | 2 DE | 2020-12 | 1 DE-Overall | 2 | 3 | 6.274454 | #####    |
| 45 | 2 DE | 2020-12 | 1 DE-Overall | 2 | 4 | 5.061849 | #####    |
| 46 | 2 DE | 2020-12 | 1 DE-Overall | 2 | 5 | 2.198047 | #####    |
| 47 | 2 DE | 2020-12 | 1 DE-Overall | 3 | 1 | 5.576448 | #####    |
| 48 | 2 DE | 2020-12 | 1 DE-Overall | 3 | 2 | 6.017751 | #####    |
| 49 | 2 DE | 2020-12 | 1 DE-Overall | 3 | 3 | 6.294744 | #####    |
| 50 | 2 DE | 2020-12 | 1 DE-Overall | 3 | 4 | 6.2055   | #####    |
| 51 | 2 DE | 2020-12 | 1 DE-Overall | 3 | 5 | 3.045578 | #####    |
| 52 | 2 DE | 2020-12 | 1 DE-South   | 1 | 1 | 5.177417 | #####    |
| 53 | 2 DE | 2020-12 | 1 DE-South   | 1 | 2 | 6.939059 | 1.154598 |
| 54 | 2 DE | 2020-12 | 1 DE-South   | 1 | 3 | 6.192957 | #####    |
| 55 | 2 DE | 2020-12 | 1 DE-South   | 1 | 4 | 5.985141 | #####    |
| 56 | 2 DE | 2020-12 | 1 DE-South   | 1 | 5 | 1.81862  | #####    |
| 57 | 2 DE | 2020-12 | 1 DE-South   | 2 | 1 | 4.772582 | #####    |
| 58 | 2 DE | 2020-12 | 1 DE-South   | 2 | 2 | 7.588235 | 1.091963 |
| 59 | 2 DE | 2020-12 | 1 DE-South   | 2 |   |          |          |
| 60 | 2 DE | 2020-12 | 1 DE-South   | 2 |   |          |          |

1  
2  
3  
4  
5  
6  
7  
8  
9  
10  
11  
12  
13  
14  
15  
16  
17  
18  
19  
20  
21  
22  
23  
24  
25  
26  
27  
28  
29  
30  
31  
32  
33  
34  
35  
36  
37  
38  
39  
40  
41  
42  
43  
44  
45  
46  
47  
48  
49  
50  
51  
52  
53  
54  
55  
56  
57  
58  
59  
60

|      |         |              |   |   |          |          |
|------|---------|--------------|---|---|----------|----------|
| 2 DE | 2020-12 | 1 DE-South   | 2 | 3 | 6.04878  | #####    |
| 2 DE | 2020-12 | 1 DE-South   | 2 | 4 | 5.269231 | 1.081862 |
| 2 DE | 2020-12 | 1 DE-South   | 2 | 5 | 1.25     | #####    |
| 2 DE | 2020-12 | 1 DE-South   | 3 | 1 | 5.686733 | #####    |
| 2 DE | 2020-12 | 1 DE-South   | 3 | 2 | 6.307692 | 2.004209 |
| 2 DE | 2020-12 | 1 DE-South   | 3 | 3 | 6.411765 | 1.476683 |
| 2 DE | 2020-12 | 1 DE-South   | 3 | 4 | 6.75     | 1.234728 |
| 2 DE | 2020-12 | 1 DE-South   | 3 | 5 | 2.7      | #####    |
| 2 DE | 2020-12 | 1 DE-West    | 1 | 1 | 4.658215 | #####    |
| 2 DE | 2020-12 | 1 DE-West    | 1 | 2 | 5.138583 | #####    |
| 2 DE | 2020-12 | 1 DE-West    | 1 | 3 | 5.403193 | #####    |
| 2 DE | 2020-12 | 1 DE-West    | 1 | 4 | 5.028397 | #####    |
| 2 DE | 2020-12 | 1 DE-West    | 1 | 5 | 2.933677 | #####    |
| 2 DE | 2020-12 | 1 DE-West    | 2 | 1 | 4.273925 | #####    |
| 2 DE | 2020-12 | 1 DE-West    | 2 | 2 | 5.552632 | #####    |
| 2 DE | 2020-12 | 1 DE-West    | 2 | 3 | 5.243902 | #####    |
| 2 DE | 2020-12 | 1 DE-West    | 2 | 4 | 4.481481 | #####    |
| 2 DE | 2020-12 | 1 DE-West    | 2 | 5 | 2.611111 | #####    |
| 2 DE | 2020-12 | 1 DE-West    | 3 | 1 | 5.022748 | #####    |
| 2 DE | 2020-12 | 1 DE-West    | 3 | 2 | 4.904762 | #####    |
| 2 DE | 2020-12 | 1 DE-West    | 3 | 3 | 5.571429 | 1.413609 |
| 2 DE | 2020-12 | 1 DE-West    | 3 | 4 | 5.444444 | 1.191411 |
| 2 DE | 2020-12 | 1 DE-West    | 3 | 5 | 3.6      | #####    |
| 2 DE | 2020-12 | 2 DE-East    | 1 | 1 | 1.558195 | #####    |
| 2 DE | 2020-12 | 2 DE-East    | 1 | 2 | 1.746053 | #####    |
| 2 DE | 2020-12 | 2 DE-East    | 1 | 3 | 1.73677  | #####    |
| 2 DE | 2020-12 | 2 DE-East    | 1 | 4 | 1.462868 | #####    |
| 2 DE | 2020-12 | 2 DE-East    | 1 | 5 | 1.308798 | #####    |
| 2 DE | 2020-12 | 2 DE-East    | 2 | 1 | 1.528922 | #####    |
| 2 DE | 2020-12 | 2 DE-East    | 2 | 2 | 1.741935 | #####    |
| 2 DE | 2020-12 | 2 DE-East    | 2 | 3 | 1.708333 | #####    |
| 2 DE | 2020-12 | 2 DE-East    | 2 | 4 | 1.361111 | #####    |
| 2 DE | 2020-12 | 2 DE-East    | 2 | 5 | 1.416667 | #####    |
| 2 DE | 2020-12 | 2 DE-East    | 3 | 1 | 1.597438 | #####    |
| 2 DE | 2020-12 | 2 DE-East    | 3 | 2 | 1.75     | #####    |
| 2 DE | 2020-12 | 2 DE-East    | 3 | 3 | 1.769231 | #####    |
| 2 DE | 2020-12 | 2 DE-East    | 3 | 4 | 1.666667 | #####    |
| 2 DE | 2020-12 | 2 DE-East    | 3 | 5 | 1.166667 | #####    |
| 2 DE | 2020-12 | 2 DE-North   | 1 | 1 | 1.450154 | #####    |
| 2 DE | 2020-12 | 2 DE-North   | 1 | 2 | 1.618251 | #####    |
| 2 DE | 2020-12 | 2 DE-North   | 1 | 3 | 1.551879 | #####    |
| 2 DE | 2020-12 | 2 DE-North   | 1 | 4 | 1.739216 | #####    |
| 2 DE | 2020-12 | 2 DE-North   | 1 | 5 | 1.016586 | #####    |
| 2 DE | 2020-12 | 2 DE-North   | 2 | 1 | 1.398941 | #####    |
| 2 DE | 2020-12 | 2 DE-North   | 2 | 2 | 1.375    | #####    |
| 2 DE | 2020-12 | 2 DE-North   | 2 | 3 | 1.675676 | #####    |
| 2 DE | 2020-12 | 2 DE-North   | 2 | 4 | 1.588235 | #####    |
| 2 DE | 2020-12 | 2 DE-North   | 2 | 5 | 1.111111 | #####    |
| 2 DE | 2020-12 | 2 DE-North   | 3 | 1 | 1.523251 | #####    |
| 2 DE | 2020-12 | 2 DE-North   | 3 | 2 | 1.8      | #####    |
| 2 DE | 2020-12 | 2 DE-North   | 3 | 3 | 1.421053 | #####    |
| 2 DE | 2020-12 | 2 DE-North   | 3 | 4 | 1.941176 | #####    |
| 2 DE | 2020-12 | 2 DE-North   | 3 | 5 | #####    | #####    |
| 2 DE | 2020-12 | 2 DE-Overall | 1 | 1 | 1.506749 | #####    |
| 2 DE | 2020-12 | 2 DE-Overall | 1 | 2 | 1.721166 | #####    |
| 2 DE | 2020-12 | 2 DE-Overall | 1 | 3 | 1.649862 | #####    |

|    |      |         |              |   |   |          |          |  |  |
|----|------|---------|--------------|---|---|----------|----------|--|--|
| 1  |      |         |              |   |   |          |          |  |  |
| 2  |      |         |              |   |   |          |          |  |  |
| 3  | 2 DE | 2020-12 | 2 DE-Overall | 1 | 4 | 1.525202 | #####    |  |  |
| 4  | 2 DE | 2020-12 | 2 DE-Overall | 1 | 5 | 1.120073 | #####    |  |  |
| 5  | 2 DE | 2020-12 | 2 DE-Overall | 2 | 1 | 1.506726 | #####    |  |  |
| 6  | 2 DE | 2020-12 | 2 DE-Overall | 2 | 2 | 1.798286 | 0.098739 |  |  |
| 7  | 2 DE | 2020-12 | 2 DE-Overall | 2 | 3 | 1.713477 | #####    |  |  |
| 8  | 2 DE | 2020-12 | 2 DE-Overall | 2 | 4 | 1.534407 | #####    |  |  |
| 9  | 2 DE | 2020-12 | 2 DE-Overall | 2 | 5 | 1.092684 | #####    |  |  |
| 10 | 2 DE | 2020-12 | 2 DE-Overall | 3 | 1 | 1.506775 | #####    |  |  |
| 11 | 2 DE | 2020-12 | 2 DE-Overall | 3 | 2 | 1.661598 | #####    |  |  |
| 12 | 2 DE | 2020-12 | 2 DE-Overall | 3 | 3 | 1.57596  | #####    |  |  |
| 13 | 2 DE | 2020-12 | 2 DE-Overall | 3 | 4 | 1.515045 | #####    |  |  |
| 14 | 2 DE | 2020-12 | 2 DE-Overall | 3 | 5 | 1.16837  | #####    |  |  |
| 15 | 2 DE | 2020-12 | 2 DE-South   | 1 | 1 | 1.619745 | #####    |  |  |
| 16 | 2 DE | 2020-12 | 2 DE-South   | 1 | 2 | 1.865584 | #####    |  |  |
| 17 | 2 DE | 2020-12 | 2 DE-South   | 1 | 3 | 1.904544 | #####    |  |  |
| 18 | 2 DE | 2020-12 | 2 DE-South   | 1 | 4 | 1.568171 | #####    |  |  |
| 19 | 2 DE | 2020-12 | 2 DE-South   | 1 | 5 | 1.150942 | #####    |  |  |
| 20 | 2 DE | 2020-12 | 2 DE-South   | 2 | 1 | 1.626323 | #####    |  |  |
| 21 | 2 DE | 2020-12 | 2 DE-South   | 2 | 2 | 1.928571 | #####    |  |  |
| 22 | 2 DE | 2020-12 | 2 DE-South   | 2 | 3 | 1.9375   | #####    |  |  |
| 23 | 2 DE | 2020-12 | 2 DE-South   | 2 | 4 | 1.647059 | #####    |  |  |
| 24 | 2 DE | 2020-12 | 2 DE-South   | 2 | 5 | 1        | #####    |  |  |
| 25 | 2 DE | 2020-12 | 2 DE-South   | 3 | 1 | 1.6116   | #####    |  |  |
| 26 | 2 DE | 2020-12 | 2 DE-South   | 3 | 2 | 1.8      | #####    |  |  |
| 27 | 2 DE | 2020-12 | 2 DE-South   | 3 | 3 | 1.857143 | #####    |  |  |
| 28 | 2 DE | 2020-12 | 2 DE-South   | 3 | 4 | 1.48     | #####    |  |  |
| 29 | 2 DE | 2020-12 | 2 DE-South   | 3 | 5 | 1.363636 | #####    |  |  |
| 30 | 2 DE | 2020-12 | 2 DE-West    | 1 | 1 | 1.427658 | #####    |  |  |
| 31 | 2 DE | 2020-12 | 2 DE-West    | 1 | 2 | 1.670139 | #####    |  |  |
| 32 | 2 DE | 2020-12 | 2 DE-West    | 1 | 3 | 1.448995 | #####    |  |  |
| 33 | 2 DE | 2020-12 | 2 DE-West    | 1 | 4 | 1.447679 | #####    |  |  |
| 34 | 2 DE | 2020-12 | 2 DE-West    | 1 | 5 | 1.059164 | #####    |  |  |
| 35 | 2 DE | 2020-12 | 2 DE-West    | 2 | 1 | 1.450159 | #####    |  |  |
| 36 | 2 DE | 2020-12 | 2 DE-West    | 2 | 2 | 1.843137 | #####    |  |  |
| 37 | 2 DE | 2020-12 | 2 DE-West    | 2 | 3 | 1.537037 | #####    |  |  |
| 38 | 2 DE | 2020-12 | 2 DE-West    | 2 | 4 | 1.514286 | #####    |  |  |
| 39 | 2 DE | 2020-12 | 2 DE-West    | 2 | 5 | 1        | #####    |  |  |
| 40 | 2 DE | 2020-12 | 2 DE-West    | 3 | 1 | 1.406282 | #####    |  |  |
| 41 | 2 DE | 2020-12 | 2 DE-West    | 3 | 2 | 1.56     | #####    |  |  |
| 42 | 2 DE | 2020-12 | 2 DE-West    | 3 | 3 | 1.357143 | #####    |  |  |
| 43 | 2 DE | 2020-12 | 2 DE-West    | 3 | 4 | 1.393939 | #####    |  |  |
| 44 | 2 DE | 2020-12 | 2 DE-West    | 3 | 5 | 1.166667 | #####    |  |  |
| 45 | 2 DE | 2020-12 | 3 DE-East    | 1 | 1 | 0        | 0        |  |  |
| 46 | 2 DE | 2020-12 | 3 DE-East    | 1 | 2 | 0        | 0        |  |  |
| 47 | 2 DE | 2020-12 | 3 DE-East    | 1 | 3 | 0        | 0        |  |  |
| 48 | 2 DE | 2020-12 | 3 DE-East    | 1 | 4 | 0        | 0        |  |  |
| 49 | 2 DE | 2020-12 | 3 DE-East    | 1 | 5 | 0        | 0        |  |  |
| 50 | 2 DE | 2020-12 | 3 DE-East    | 2 | 1 | 0        | 0        |  |  |
| 51 | 2 DE | 2020-12 | 3 DE-East    | 2 | 2 | 0        | 0        |  |  |
| 52 | 2 DE | 2020-12 | 3 DE-East    | 2 | 3 | 0        | 0        |  |  |
| 53 | 2 DE | 2020-12 | 3 DE-East    | 2 | 4 | 0        | 0        |  |  |
| 54 | 2 DE | 2020-12 | 3 DE-East    | 2 | 5 | 0        | 0        |  |  |
| 55 | 2 DE | 2020-12 | 3 DE-East    | 3 | 1 | 0        | 0        |  |  |
| 56 | 2 DE | 2020-12 | 3 DE-East    | 3 | 2 | 0        | 0        |  |  |
| 57 | 2 DE | 2020-12 | 3 DE-East    | 3 | 3 | 0        | 0        |  |  |
| 58 | 2 DE | 2020-12 | 3 DE-East    | 3 | 4 | 0        | 0        |  |  |
| 59 | 2 DE | 2020-12 | 3 DE-East    | 3 | 5 | 0        | 0        |  |  |
| 60 | 2 DE | 2020-12 | 3 DE-East    | 3 | 6 | 0        | 0        |  |  |

|    |      |         |              |   |   |   |   |
|----|------|---------|--------------|---|---|---|---|
| 1  |      |         |              |   |   |   |   |
| 2  |      |         |              |   |   |   |   |
| 3  | 2 DE | 2020-12 | 3 DE-East    | 3 | 5 | 0 | 0 |
| 4  | 2 DE | 2020-12 | 3 DE-North   | 1 | 1 | 0 | 0 |
| 5  | 2 DE | 2020-12 | 3 DE-North   | 1 | 2 | 0 | 0 |
| 6  | 2 DE | 2020-12 | 3 DE-North   | 1 | 3 | 0 | 0 |
| 7  | 2 DE | 2020-12 | 3 DE-North   | 1 | 4 | 0 | 0 |
| 8  | 2 DE | 2020-12 | 3 DE-North   | 1 | 5 | 0 | 0 |
| 9  | 2 DE | 2020-12 | 3 DE-North   | 2 | 1 | 0 | 0 |
| 10 | 2 DE | 2020-12 | 3 DE-North   | 2 | 2 | 0 | 0 |
| 11 | 2 DE | 2020-12 | 3 DE-North   | 2 | 3 | 0 | 0 |
| 12 | 2 DE | 2020-12 | 3 DE-North   | 2 | 4 | 0 | 0 |
| 13 | 2 DE | 2020-12 | 3 DE-North   | 2 | 5 | 0 | 0 |
| 14 | 2 DE | 2020-12 | 3 DE-North   | 3 | 1 | 0 | 0 |
| 15 | 2 DE | 2020-12 | 3 DE-North   | 3 | 2 | 0 | 0 |
| 16 | 2 DE | 2020-12 | 3 DE-North   | 3 | 3 | 0 | 0 |
| 17 | 2 DE | 2020-12 | 3 DE-North   | 3 | 4 | 0 | 0 |
| 18 | 2 DE | 2020-12 | 3 DE-North   | 3 | 5 | 0 | 0 |
| 19 | 2 DE | 2020-12 | 3 DE-Overall | 1 | 1 | 0 | 0 |
| 20 | 2 DE | 2020-12 | 3 DE-Overall | 1 | 2 | 0 | 0 |
| 21 | 2 DE | 2020-12 | 3 DE-Overall | 1 | 3 | 0 | 0 |
| 22 | 2 DE | 2020-12 | 3 DE-Overall | 1 | 4 | 0 | 0 |
| 23 | 2 DE | 2020-12 | 3 DE-Overall | 1 | 5 | 0 | 0 |
| 24 | 2 DE | 2020-12 | 3 DE-Overall | 2 | 1 | 0 | 0 |
| 25 | 2 DE | 2020-12 | 3 DE-Overall | 2 | 2 | 0 | 0 |
| 26 | 2 DE | 2020-12 | 3 DE-Overall | 2 | 3 | 0 | 0 |
| 27 | 2 DE | 2020-12 | 3 DE-Overall | 2 | 4 | 0 | 0 |
| 28 | 2 DE | 2020-12 | 3 DE-Overall | 2 | 5 | 0 | 0 |
| 29 | 2 DE | 2020-12 | 3 DE-Overall | 3 | 1 | 0 | 0 |
| 30 | 2 DE | 2020-12 | 3 DE-Overall | 3 | 2 | 0 | 0 |
| 31 | 2 DE | 2020-12 | 3 DE-Overall | 3 | 3 | 0 | 0 |
| 32 | 2 DE | 2020-12 | 3 DE-Overall | 3 | 4 | 0 | 0 |
| 33 | 2 DE | 2020-12 | 3 DE-Overall | 3 | 5 | 0 | 0 |
| 34 | 2 DE | 2020-12 | 3 DE-South   | 1 | 1 | 0 | 0 |
| 35 | 2 DE | 2020-12 | 3 DE-South   | 1 | 2 | 0 | 0 |
| 36 | 2 DE | 2020-12 | 3 DE-South   | 1 | 3 | 0 | 0 |
| 37 | 2 DE | 2020-12 | 3 DE-South   | 1 | 4 | 0 | 0 |
| 38 | 2 DE | 2020-12 | 3 DE-South   | 1 | 5 | 0 | 0 |
| 39 | 2 DE | 2020-12 | 3 DE-South   | 2 | 1 | 0 | 0 |
| 40 | 2 DE | 2020-12 | 3 DE-South   | 2 | 2 | 0 | 0 |
| 41 | 2 DE | 2020-12 | 3 DE-South   | 2 | 3 | 0 | 0 |
| 42 | 2 DE | 2020-12 | 3 DE-South   | 2 | 4 | 0 | 0 |
| 43 | 2 DE | 2020-12 | 3 DE-South   | 2 | 5 | 0 | 0 |
| 44 | 2 DE | 2020-12 | 3 DE-South   | 3 | 1 | 0 | 0 |
| 45 | 2 DE | 2020-12 | 3 DE-South   | 3 | 2 | 0 | 0 |
| 46 | 2 DE | 2020-12 | 3 DE-South   | 3 | 3 | 0 | 0 |
| 47 | 2 DE | 2020-12 | 3 DE-South   | 3 | 4 | 0 | 0 |
| 48 | 2 DE | 2020-12 | 3 DE-South   | 3 | 5 | 0 | 0 |
| 49 | 2 DE | 2020-12 | 3 DE-West    | 1 | 1 | 0 | 0 |
| 50 | 2 DE | 2020-12 | 3 DE-West    | 1 | 2 | 0 | 0 |
| 51 | 2 DE | 2020-12 | 3 DE-West    | 1 | 3 | 0 | 0 |
| 52 | 2 DE | 2020-12 | 3 DE-West    | 1 | 4 | 0 | 0 |
| 53 | 2 DE | 2020-12 | 3 DE-West    | 1 | 5 | 0 | 0 |
| 54 | 2 DE | 2020-12 | 3 DE-West    | 2 | 1 | 0 | 0 |
| 55 | 2 DE | 2020-12 | 3 DE-West    | 2 | 2 | 0 | 0 |
| 56 | 2 DE | 2020-12 | 3 DE-West    | 2 | 3 | 0 | 0 |
| 57 | 2 DE | 2020-12 | 3 DE-West    | 2 | 4 | 0 | 0 |
| 58 | 2 DE | 2020-12 | 3 DE-West    | 2 | 5 | 0 | 0 |
| 59 | 2 DE | 2020-12 | 3 DE-West    | 2 |   |   |   |
| 60 | 2 DE | 2020-12 | 3 DE-West    | 2 |   |   |   |

|    |      |         |              |   |   |          |          |  |
|----|------|---------|--------------|---|---|----------|----------|--|
| 1  |      |         |              |   |   |          |          |  |
| 2  |      |         |              |   |   |          |          |  |
| 3  | 2 DE | 2020-12 | 3 DE-West    | 3 | 1 | 0        | 0        |  |
| 4  | 2 DE | 2020-12 | 3 DE-West    | 3 | 2 | 0        | 0        |  |
| 5  | 2 DE | 2020-12 | 3 DE-West    | 3 | 3 | 0        | 0        |  |
| 6  | 2 DE | 2020-12 | 3 DE-West    | 3 | 4 | 0        | 0        |  |
| 7  | 2 DE | 2020-12 | 3 DE-West    | 3 | 5 | 0        | 0        |  |
| 8  | 2 DE | 2020-12 | 4 DE-East    | 1 | 1 | 2.488172 | #####    |  |
| 9  | 2 DE | 2020-12 | 4 DE-East    | 1 | 2 | 2.839365 | #####    |  |
| 10 | 2 DE | 2020-12 | 4 DE-East    | 1 | 3 | 3.44752  | #####    |  |
| 11 | 2 DE | 2020-12 | 4 DE-East    | 1 | 4 | 3.274753 | #####    |  |
| 12 | 2 DE | 2020-12 | 4 DE-East    | 1 | 5 | #####    | #####    |  |
| 13 | 2 DE | 2020-12 | 4 DE-East    | 2 | 1 | 2.38238  | #####    |  |
| 14 | 2 DE | 2020-12 | 4 DE-East    | 2 | 2 | 1.735294 | #####    |  |
| 15 | 2 DE | 2020-12 | 4 DE-East    | 2 | 3 | 3.744681 | #####    |  |
| 16 | 2 DE | 2020-12 | 4 DE-East    | 2 | 4 | 3.102564 | #####    |  |
| 17 | 2 DE | 2020-12 | 4 DE-East    | 2 | 5 | 0        | 0        |  |
| 18 | 2 DE | 2020-12 | 4 DE-East    | 3 | 1 | 2.627167 | #####    |  |
| 19 | 2 DE | 2020-12 | 4 DE-East    | 3 | 2 | 4        | 1.744139 |  |
| 20 | 2 DE | 2020-12 | 4 DE-East    | 3 | 3 | 3.115385 | #####    |  |
| 21 | 2 DE | 2020-12 | 4 DE-East    | 3 | 4 | 3.625    | 1.716007 |  |
| 22 | 2 DE | 2020-12 | 4 DE-East    | 3 | 5 | #####    | #####    |  |
| 23 | 2 DE | 2020-12 | 4 DE-East    | 3 | 5 | #####    | #####    |  |
| 24 | 2 DE | 2020-12 | 4 DE-North   | 1 | 1 | 2.653199 | #####    |  |
| 25 | 2 DE | 2020-12 | 4 DE-North   | 1 | 2 | 3.634342 | 1.001679 |  |
| 26 | 2 DE | 2020-12 | 4 DE-North   | 1 | 3 | 4.61636  | #####    |  |
| 27 | 2 DE | 2020-12 | 4 DE-North   | 1 | 4 | 2.805582 | #####    |  |
| 28 | 2 DE | 2020-12 | 4 DE-North   | 1 | 5 | #####    | #####    |  |
| 29 | 2 DE | 2020-12 | 4 DE-North   | 2 | 1 | 1.974251 | #####    |  |
| 30 | 2 DE | 2020-12 | 4 DE-North   | 2 | 2 | 3.380952 | 1.562803 |  |
| 31 | 2 DE | 2020-12 | 4 DE-North   | 2 | 3 | 3.923077 | 1.056263 |  |
| 32 | 2 DE | 2020-12 | 4 DE-North   | 2 | 4 | 2.368421 | #####    |  |
| 33 | 2 DE | 2020-12 | 4 DE-North   | 2 | 5 | 0        | 0        |  |
| 34 | 2 DE | 2020-12 | 4 DE-North   | 3 | 1 | 3.622151 | #####    |  |
| 35 | 2 DE | 2020-12 | 4 DE-North   | 3 | 2 | 3.8      | 1.302382 |  |
| 36 | 2 DE | 2020-12 | 4 DE-North   | 3 | 3 | 5.35     | 1.637586 |  |
| 37 | 2 DE | 2020-12 | 4 DE-North   | 3 | 4 | 3.5      | 1.548779 |  |
| 38 | 2 DE | 2020-12 | 4 DE-North   | 3 | 5 | 0.5      | #####    |  |
| 39 | 2 DE | 2020-12 | 4 DE-Overall | 1 | 1 | 2.343119 | #####    |  |
| 40 | 2 DE | 2020-12 | 4 DE-Overall | 1 | 2 | 3.063277 | #####    |  |
| 41 | 2 DE | 2020-12 | 4 DE-Overall | 1 | 3 | 3.442008 | #####    |  |
| 42 | 2 DE | 2020-12 | 4 DE-Overall | 1 | 4 | 2.610214 | #####    |  |
| 43 | 2 DE | 2020-12 | 4 DE-Overall | 1 | 5 | #####    | #####    |  |
| 44 | 2 DE | 2020-12 | 4 DE-Overall | 2 | 1 | 2.095335 | #####    |  |
| 45 | 2 DE | 2020-12 | 4 DE-Overall | 2 | 2 | 3.269516 | #####    |  |
| 46 | 2 DE | 2020-12 | 4 DE-Overall | 2 | 3 | 2.971256 | #####    |  |
| 47 | 2 DE | 2020-12 | 4 DE-Overall | 2 | 4 | 2.466561 | #####    |  |
| 48 | 2 DE | 2020-12 | 4 DE-Overall | 2 | 5 | #####    | #####    |  |
| 49 | 2 DE | 2020-12 | 4 DE-Overall | 3 | 1 | 2.63319  | #####    |  |
| 50 | 2 DE | 2020-12 | 4 DE-Overall | 3 | 2 | 2.903945 | #####    |  |
| 51 | 2 DE | 2020-12 | 4 DE-Overall | 3 | 3 | 3.976952 | #####    |  |
| 52 | 2 DE | 2020-12 | 4 DE-Overall | 3 | 4 | 2.782762 | #####    |  |
| 53 | 2 DE | 2020-12 | 4 DE-Overall | 3 | 5 | #####    | #####    |  |
| 54 | 2 DE | 2020-12 | 4 DE-South   | 1 | 1 | 2.756105 | #####    |  |
| 55 | 2 DE | 2020-12 | 4 DE-South   | 1 | 2 | 4.483754 | 1.011202 |  |
| 56 | 2 DE | 2020-12 | 4 DE-South   | 1 | 3 | 3.826604 | #####    |  |
| 57 | 2 DE | 2020-12 | 4 DE-South   | 1 | 4 | 2.688469 | #####    |  |
| 58 | 2 DE | 2020-12 | 4 DE-South   | 1 | 5 | #####    | #####    |  |
| 59 | 2 DE | 2020-12 | 4 DE-South   | 1 | 5 | #####    | #####    |  |
| 60 | 2 DE | 2020-12 | 4 DE-South   | 2 | 1 | 2.358113 | #####    |  |

|    |      |         |              |   |   |          |          |  |
|----|------|---------|--------------|---|---|----------|----------|--|
| 1  |      |         |              |   |   |          |          |  |
| 2  |      |         |              |   |   |          |          |  |
| 3  | 2 DE | 2020-12 | 4 DE-South   | 2 | 2 | 4.073171 | #####    |  |
| 4  | 2 DE | 2020-12 | 4 DE-South   | 2 | 3 | 2.93617  | #####    |  |
| 5  | 2 DE | 2020-12 | 4 DE-South   | 2 | 4 | 2.628571 | #####    |  |
| 6  | 2 DE | 2020-12 | 4 DE-South   | 2 | 5 | #####    | #####    |  |
| 7  | 2 DE | 2020-12 | 4 DE-South   | 3 | 1 | 3.211765 | #####    |  |
| 8  | 2 DE | 2020-12 | 4 DE-South   | 3 | 2 | 4.875    | 1.747589 |  |
| 9  | 2 DE | 2020-12 | 4 DE-South   | 3 | 3 | 4.88     | 1.540292 |  |
| 10 | 2 DE | 2020-12 | 4 DE-South   | 3 | 4 | 2.75     | #####    |  |
| 11 | 2 DE | 2020-12 | 4 DE-South   | 3 | 5 | 0        | 0        |  |
| 12 | 2 DE | 2020-12 | 4 DE-West    | 1 | 1 | 1.849582 | #####    |  |
| 13 | 2 DE | 2020-12 | 4 DE-West    | 1 | 2 | 2.282725 | #####    |  |
| 14 | 2 DE | 2020-12 | 4 DE-West    | 1 | 3 | 2.486189 | #####    |  |
| 15 | 2 DE | 2020-12 | 4 DE-West    | 1 | 4 | 2.192959 | #####    |  |
| 16 | 2 DE | 2020-12 | 4 DE-West    | 1 | 5 | #####    | #####    |  |
| 17 | 2 DE | 2020-12 | 4 DE-West    | 2 | 1 | 1.80059  | #####    |  |
| 18 | 2 DE | 2020-12 | 4 DE-West    | 2 | 2 | 3.27451  | #####    |  |
| 19 | 2 DE | 2020-12 | 4 DE-West    | 2 | 3 | 2.039216 | #####    |  |
| 20 | 2 DE | 2020-12 | 4 DE-West    | 2 | 4 | 2        | #####    |  |
| 21 | 2 DE | 2020-12 | 4 DE-West    | 2 | 5 | #####    | #####    |  |
| 22 | 2 DE | 2020-12 | 4 DE-West    | 3 | 1 | 1.900873 | #####    |  |
| 23 | 2 DE | 2020-12 | 4 DE-West    | 3 | 2 | 1.625    | #####    |  |
| 24 | 2 DE | 2020-12 | 4 DE-West    | 3 | 3 | 3        | 1.078578 |  |
| 25 | 2 DE | 2020-12 | 4 DE-West    | 3 | 4 | 2.387097 | 1.063774 |  |
| 26 | 2 DE | 2020-12 | 4 DE-West    | 3 | 5 | 0        | 0        |  |
| 27 | 2 DE | 2020-12 | 5 DE-East    | 1 | 1 | 1.834239 | #####    |  |
| 28 | 2 DE | 2020-12 | 5 DE-East    | 1 | 2 | 1.897448 | #####    |  |
| 29 | 2 DE | 2020-12 | 5 DE-East    | 1 | 3 | 1.823436 | #####    |  |
| 30 | 2 DE | 2020-12 | 5 DE-East    | 1 | 4 | 1.888044 | #####    |  |
| 31 | 2 DE | 2020-12 | 5 DE-East    | 1 | 5 | 1.751693 | #####    |  |
| 32 | 2 DE | 2020-12 | 5 DE-East    | 2 | 1 | 1.878179 | #####    |  |
| 33 | 2 DE | 2020-12 | 5 DE-East    | 2 | 2 | 2.074074 | #####    |  |
| 34 | 2 DE | 2020-12 | 5 DE-East    | 2 | 3 | 2.040816 | #####    |  |
| 35 | 2 DE | 2020-12 | 5 DE-East    | 2 | 4 | 1.9375   | #####    |  |
| 36 | 2 DE | 2020-12 | 5 DE-East    | 2 | 5 | 1.5      | #####    |  |
| 37 | 2 DE | 2020-12 | 5 DE-East    | 3 | 1 | 1.777348 | #####    |  |
| 38 | 2 DE | 2020-12 | 5 DE-East    | 3 | 2 | 1.75     | #####    |  |
| 39 | 2 DE | 2020-12 | 5 DE-East    | 3 | 3 | 1.56     | #####    |  |
| 40 | 2 DE | 2020-12 | 5 DE-East    | 3 | 4 | 1.8      | #####    |  |
| 41 | 2 DE | 2020-12 | 5 DE-East    | 3 | 5 | 2.083333 | #####    |  |
| 42 | 2 DE | 2020-12 | 5 DE-North   | 1 | 1 | 1.554914 | #####    |  |
| 43 | 2 DE | 2020-12 | 5 DE-North   | 1 | 2 | 2.775478 | #####    |  |
| 44 | 2 DE | 2020-12 | 5 DE-North   | 1 | 3 | 1.070876 | #####    |  |
| 45 | 2 DE | 2020-12 | 5 DE-North   | 1 | 4 | 1.87353  | #####    |  |
| 46 | 2 DE | 2020-12 | 5 DE-North   | 1 | 5 | 1.051902 | #####    |  |
| 47 | 2 DE | 2020-12 | 5 DE-North   | 2 | 1 | 1.239629 | #####    |  |
| 48 | 2 DE | 2020-12 | 5 DE-North   | 2 | 2 | 1.863636 | #####    |  |
| 49 | 2 DE | 2020-12 | 5 DE-North   | 2 | 3 | 1.081081 | #####    |  |
| 50 | 2 DE | 2020-12 | 5 DE-North   | 2 | 4 | 1.647059 | #####    |  |
| 51 | 2 DE | 2020-12 | 5 DE-North   | 2 | 5 | #####    | #####    |  |
| 52 | 2 DE | 2020-12 | 5 DE-North   | 3 | 1 | 1.9952   | #####    |  |
| 53 | 2 DE | 2020-12 | 5 DE-North   | 3 | 2 | 3.4      | #####    |  |
| 54 | 2 DE | 2020-12 | 5 DE-North   | 3 | 3 | 1.058824 | #####    |  |
| 55 | 2 DE | 2020-12 | 5 DE-North   | 3 | 4 | 2.176471 | #####    |  |
| 56 | 2 DE | 2020-12 | 5 DE-North   | 3 | 5 | 1.5      | #####    |  |
| 57 | 2 DE | 2020-12 | 5 DE-Overall | 1 | 1 | 1.526408 | #####    |  |
| 58 | 2 DE | 2020-12 | 5 DE-Overall | 1 | 2 | 1.746903 | #####    |  |
| 59 | 2 DE | 2020-12 | 5 DE-Overall | 1 |   |          |          |  |
| 60 | 2 DE | 2020-12 | 5 DE-Overall | 1 |   |          |          |  |

|    |      |         |              |   |   |          |          |  |
|----|------|---------|--------------|---|---|----------|----------|--|
| 1  |      |         |              |   |   |          |          |  |
| 2  |      |         |              |   |   |          |          |  |
| 3  | 2 DE | 2020-12 | 5 DE-Overall | 1 | 3 | 1.394127 | #####    |  |
| 4  | 2 DE | 2020-12 | 5 DE-Overall | 1 | 4 | 1.677537 | #####    |  |
| 5  | 2 DE | 2020-12 | 5 DE-Overall | 1 | 5 | 1.284829 | #####    |  |
| 6  | 2 DE | 2020-12 | 5 DE-Overall | 2 | 1 | 1.385038 | #####    |  |
| 7  | 2 DE | 2020-12 | 5 DE-Overall | 2 | 2 | 1.654355 | #####    |  |
| 8  | 2 DE | 2020-12 | 5 DE-Overall | 2 | 3 | 1.586242 | #####    |  |
| 9  | 2 DE | 2020-12 | 5 DE-Overall | 2 | 4 | 1.457969 | #####    |  |
| 10 | 2 DE | 2020-12 | 5 DE-Overall | 2 | 5 | #####    | #####    |  |
| 11 | 2 DE | 2020-12 | 5 DE-Overall | 3 | 1 | 1.690841 | #####    |  |
| 12 | 2 DE | 2020-12 | 5 DE-Overall | 3 | 2 | 1.812858 | #####    |  |
| 13 | 2 DE | 2020-12 | 5 DE-Overall | 3 | 3 | 1.166352 | #####    |  |
| 14 | 2 DE | 2020-12 | 5 DE-Overall | 3 | 4 | 1.922378 | #####    |  |
| 15 | 2 DE | 2020-12 | 5 DE-Overall | 3 | 5 | 1.889443 | #####    |  |
| 16 | 2 DE | 2020-12 | 5 DE-South   | 1 | 1 | 1.339824 | #####    |  |
| 17 | 2 DE | 2020-12 | 5 DE-South   | 1 | 2 | 1.069976 | #####    |  |
| 18 | 2 DE | 2020-12 | 5 DE-South   | 1 | 3 | 1.312042 | #####    |  |
| 19 | 2 DE | 2020-12 | 5 DE-South   | 1 | 4 | 1.947424 | #####    |  |
| 20 | 2 DE | 2020-12 | 5 DE-South   | 1 | 5 | #####    | #####    |  |
| 21 | 2 DE | 2020-12 | 5 DE-South   | 2 | 1 | 1.110229 | #####    |  |
| 22 | 2 DE | 2020-12 | 5 DE-South   | 2 | 2 | 1.275    | #####    |  |
| 23 | 2 DE | 2020-12 | 5 DE-South   | 2 | 3 | 1.434783 | #####    |  |
| 24 | 2 DE | 2020-12 | 5 DE-South   | 2 | 4 | 1.454545 | #####    |  |
| 25 | 2 DE | 2020-12 | 5 DE-South   | 2 | 5 | #####    | #####    |  |
| 26 | 2 DE | 2020-12 | 5 DE-South   | 3 | 1 | 1.622459 | #####    |  |
| 27 | 2 DE | 2020-12 | 5 DE-South   | 3 | 2 | #####    | #####    |  |
| 28 | 2 DE | 2020-12 | 5 DE-South   | 3 | 3 | 1.142857 | #####    |  |
| 29 | 2 DE | 2020-12 | 5 DE-South   | 3 | 4 | 2.461538 | #####    |  |
| 30 | 2 DE | 2020-12 | 5 DE-South   | 3 | 5 | 1.4      | #####    |  |
| 31 | 2 DE | 2020-12 | 5 DE-West    | 1 | 1 | 1.515485 | #####    |  |
| 32 | 2 DE | 2020-12 | 5 DE-West    | 1 | 2 | 1.796887 | #####    |  |
| 33 | 2 DE | 2020-12 | 5 DE-West    | 1 | 3 | 1.336518 | #####    |  |
| 34 | 2 DE | 2020-12 | 5 DE-West    | 1 | 4 | 1.288411 | #####    |  |
| 35 | 2 DE | 2020-12 | 5 DE-West    | 1 | 5 | 1.656687 | #####    |  |
| 36 | 2 DE | 2020-12 | 5 DE-West    | 2 | 1 | 1.425995 | #####    |  |
| 37 | 2 DE | 2020-12 | 5 DE-West    | 2 | 2 | 1.723404 | #####    |  |
| 38 | 2 DE | 2020-12 | 5 DE-West    | 2 | 3 | 1.66     | #####    |  |
| 39 | 2 DE | 2020-12 | 5 DE-West    | 2 | 4 | 1.114286 | #####    |  |
| 40 | 2 DE | 2020-12 | 5 DE-West    | 2 | 5 | 1.315789 | #####    |  |
| 41 | 2 DE | 2020-12 | 5 DE-West    | 3 | 1 | 1.604411 | #####    |  |
| 42 | 2 DE | 2020-12 | 5 DE-West    | 3 | 2 | 1.84     | #####    |  |
| 43 | 2 DE | 2020-12 | 5 DE-West    | 3 | 3 | 1        | #####    |  |
| 44 | 2 DE | 2020-12 | 5 DE-West    | 3 | 4 | 1.448276 | #####    |  |
| 45 | 2 DE | 2020-12 | 5 DE-West    | 3 | 5 | 2.4      | #####    |  |
| 46 | 2 DE | 2020-12 | 5 DE-West    | 3 | 5 | 2.4      | #####    |  |
| 47 | 2 DE | 2020-13 | 1 DE-East    | 1 | 1 | 3.734259 | #####    |  |
| 48 | 2 DE | 2020-13 | 1 DE-East    | 1 | 2 | 5.69693  | #####    |  |
| 49 | 2 DE | 2020-13 | 1 DE-East    | 1 | 3 | 4.358074 | #####    |  |
| 50 | 2 DE | 2020-13 | 1 DE-East    | 1 | 4 | 4.053974 | #####    |  |
| 51 | 2 DE | 2020-13 | 1 DE-East    | 1 | 5 | 2.312687 | #####    |  |
| 52 | 2 DE | 2020-13 | 1 DE-East    | 2 | 1 | 3.295417 | #####    |  |
| 53 | 2 DE | 2020-13 | 1 DE-East    | 2 | 2 | 3.8      | #####    |  |
| 54 | 2 DE | 2020-13 | 1 DE-East    | 2 | 3 | 4.253521 | #####    |  |
| 55 | 2 DE | 2020-13 | 1 DE-East    | 2 | 4 | 3.702128 | #####    |  |
| 56 | 2 DE | 2020-13 | 1 DE-East    | 2 | 5 | 2.347826 | #####    |  |
| 57 | 2 DE | 2020-13 | 1 DE-East    | 3 | 1 | 4.298924 | #####    |  |
| 58 | 2 DE | 2020-13 | 1 DE-East    | 3 | 2 | 7.352941 | 1.694668 |  |
| 59 | 2 DE | 2020-13 | 1 DE-East    | 3 | 3 | 4.438596 | #####    |  |
| 60 | 2 DE | 2020-13 | 1 DE-East    | 3 | 3 | 4.438596 | #####    |  |

|    |      |         |              |   |   |          |          |  |
|----|------|---------|--------------|---|---|----------|----------|--|
| 1  |      |         |              |   |   |          |          |  |
| 2  |      |         |              |   |   |          |          |  |
| 3  | 2 DE | 2020-13 | 1 DE-East    | 3 | 4 | 4.492063 | #####    |  |
| 4  | 2 DE | 2020-13 | 1 DE-East    | 3 | 5 | 2.230769 | #####    |  |
| 5  | 2 DE | 2020-13 | 1 DE-North   | 1 | 1 | 3.808032 | #####    |  |
| 6  | 2 DE | 2020-13 | 1 DE-North   | 1 | 2 | 3.790502 | #####    |  |
| 7  | 2 DE | 2020-13 | 1 DE-North   | 1 | 3 | 4.442095 | #####    |  |
| 8  | 2 DE | 2020-13 | 1 DE-North   | 1 | 4 | 5.096335 | #####    |  |
| 9  | 2 DE | 2020-13 | 1 DE-North   | 1 | 5 | 2.105294 | #####    |  |
| 10 | 2 DE | 2020-13 | 1 DE-North   | 2 | 1 | 3.163883 | #####    |  |
| 11 | 2 DE | 2020-13 | 1 DE-North   | 2 | 2 | 3.22807  | #####    |  |
| 12 | 2 DE | 2020-13 | 1 DE-North   | 2 | 3 | 3.729412 | #####    |  |
| 13 | 2 DE | 2020-13 | 1 DE-North   | 2 | 4 | 4.133333 | #####    |  |
| 14 | 2 DE | 2020-13 | 1 DE-North   | 2 | 5 | 2.095238 | #####    |  |
| 15 | 2 DE | 2020-13 | 1 DE-North   | 3 | 1 | 4.522667 | #####    |  |
| 16 | 2 DE | 2020-13 | 1 DE-North   | 3 | 2 | 4.315789 | #####    |  |
| 17 | 2 DE | 2020-13 | 1 DE-North   | 3 | 3 | 5.243902 | #####    |  |
| 18 | 2 DE | 2020-13 | 1 DE-North   | 3 | 4 | 5.890411 | #####    |  |
| 19 | 2 DE | 2020-13 | 1 DE-North   | 3 | 5 | 2.121212 | #####    |  |
| 20 | 2 DE | 2020-13 | 1 DE-Overall | 1 | 1 | 3.731748 | #####    |  |
| 21 | 2 DE | 2020-13 | 1 DE-Overall | 1 | 2 | 4.170652 | #####    |  |
| 22 | 2 DE | 2020-13 | 1 DE-Overall | 1 | 3 | 4.629699 | #####    |  |
| 23 | 2 DE | 2020-13 | 1 DE-Overall | 1 | 4 | 4.375736 | #####    |  |
| 24 | 2 DE | 2020-13 | 1 DE-Overall | 1 | 5 | 2.198727 | #####    |  |
| 25 | 2 DE | 2020-13 | 1 DE-Overall | 2 | 1 | 3.308147 | #####    |  |
| 26 | 2 DE | 2020-13 | 1 DE-Overall | 2 | 2 | 3.794495 | #####    |  |
| 27 | 2 DE | 2020-13 | 1 DE-Overall | 2 | 3 | 4.244746 | #####    |  |
| 28 | 2 DE | 2020-13 | 1 DE-Overall | 2 | 4 | 3.835872 | #####    |  |
| 29 | 2 DE | 2020-13 | 1 DE-Overall | 2 | 5 | 2.181147 | #####    |  |
| 30 | 2 DE | 2020-13 | 1 DE-Overall | 3 | 1 | 4.183223 | #####    |  |
| 31 | 2 DE | 2020-13 | 1 DE-Overall | 3 | 2 | 4.456371 | #####    |  |
| 32 | 2 DE | 2020-13 | 1 DE-Overall | 3 | 3 | 4.97912  | #####    |  |
| 33 | 2 DE | 2020-13 | 1 DE-Overall | 3 | 4 | 4.884354 | #####    |  |
| 34 | 2 DE | 2020-13 | 1 DE-Overall | 3 | 5 | 2.22634  | #####    |  |
| 35 | 2 DE | 2020-13 | 1 DE-South   | 1 | 1 | 3.832665 | #####    |  |
| 36 | 2 DE | 2020-13 | 1 DE-South   | 1 | 2 | 4.243509 | #####    |  |
| 37 | 2 DE | 2020-13 | 1 DE-South   | 1 | 3 | 4.569138 | #####    |  |
| 38 | 2 DE | 2020-13 | 1 DE-South   | 1 | 4 | 4.392816 | #####    |  |
| 39 | 2 DE | 2020-13 | 1 DE-South   | 1 | 5 | 2.454549 | #####    |  |
| 40 | 2 DE | 2020-13 | 1 DE-South   | 2 | 1 | 3.798648 | #####    |  |
| 41 | 2 DE | 2020-13 | 1 DE-South   | 2 | 2 | 4.235294 | #####    |  |
| 42 | 2 DE | 2020-13 | 1 DE-South   | 2 | 3 | 4.33871  | #####    |  |
| 43 | 2 DE | 2020-13 | 1 DE-South   | 2 | 4 | 4.192771 | #####    |  |
| 44 | 2 DE | 2020-13 | 1 DE-South   | 2 | 5 | 2.806452 | #####    |  |
| 45 | 2 DE | 2020-13 | 1 DE-South   | 3 | 1 | 3.863687 | #####    |  |
| 46 | 2 DE | 2020-13 | 1 DE-South   | 3 | 2 | 4.25     | 1.000492 |  |
| 47 | 2 DE | 2020-13 | 1 DE-South   | 3 | 3 | 4.724138 | #####    |  |
| 48 | 2 DE | 2020-13 | 1 DE-South   | 3 | 4 | 4.612903 | #####    |  |
| 49 | 2 DE | 2020-13 | 1 DE-South   | 3 | 5 | 2.119048 | #####    |  |
| 50 | 2 DE | 2020-13 | 1 DE-West    | 1 | 1 | 3.607345 | #####    |  |
| 51 | 2 DE | 2020-13 | 1 DE-West    | 1 | 2 | 3.764193 | #####    |  |
| 52 | 2 DE | 2020-13 | 1 DE-West    | 1 | 3 | 4.927324 | #####    |  |
| 53 | 2 DE | 2020-13 | 1 DE-West    | 1 | 4 | 4.189    | #####    |  |
| 54 | 2 DE | 2020-13 | 1 DE-West    | 1 | 5 | 1.990757 | #####    |  |
| 55 | 2 DE | 2020-13 | 1 DE-West    | 2 | 1 | 3.021942 | #####    |  |
| 56 | 2 DE | 2020-13 | 1 DE-West    | 2 | 2 | 3.804348 | #####    |  |
| 57 | 2 DE | 2020-13 | 1 DE-West    | 2 | 3 | 4.457143 | #####    |  |
| 58 | 2 DE | 2020-13 | 1 DE-West    | 2 | 4 | 3.362319 | #####    |  |
| 59 | 2 DE | 2020-13 | 1 DE-West    | 2 |   |          |          |  |
| 60 | 2 DE | 2020-13 | 1 DE-West    | 2 |   |          |          |  |



|    |      |         |              |   |   |          |       |  |
|----|------|---------|--------------|---|---|----------|-------|--|
| 1  |      |         |              |   |   |          |       |  |
| 2  |      |         |              |   |   |          |       |  |
| 3  | 2 DE | 2020-13 | 1 DE-West    | 2 | 5 | 1.77193  | ##### |  |
| 4  | 2 DE | 2020-13 | 1 DE-West    | 3 | 1 | 4.233711 | ##### |  |
| 5  | 2 DE | 2020-13 | 1 DE-West    | 3 | 2 | 3.73913  | ##### |  |
| 6  | 2 DE | 2020-13 | 1 DE-West    | 3 | 3 | 5.45098  | ##### |  |
| 7  | 2 DE | 2020-13 | 1 DE-West    | 3 | 4 | 4.791667 | ##### |  |
| 8  | 2 DE | 2020-13 | 1 DE-West    | 3 | 5 | 2.411765 | ##### |  |
| 9  | 2 DE | 2020-13 | 2 DE-East    | 1 | 1 | 1.388566 | ##### |  |
| 10 | 2 DE | 2020-13 | 2 DE-East    | 1 | 2 | 1.582252 | ##### |  |
| 11 | 2 DE | 2020-13 | 2 DE-East    | 1 | 3 | 1.586936 | ##### |  |
| 12 | 2 DE | 2020-13 | 2 DE-East    | 1 | 4 | 1.427976 | ##### |  |
| 13 | 2 DE | 2020-13 | 2 DE-East    | 1 | 5 | 1.100504 | ##### |  |
| 14 | 2 DE | 2020-13 | 2 DE-East    | 2 | 1 | 1.394635 | ##### |  |
| 15 | 2 DE | 2020-13 | 2 DE-East    | 2 | 2 | 1.795455 | ##### |  |
| 16 | 2 DE | 2020-13 | 2 DE-East    | 2 | 3 | 1.813333 | ##### |  |
| 17 | 2 DE | 2020-13 | 2 DE-East    | 2 | 4 | 1.363636 | ##### |  |
| 18 | 2 DE | 2020-13 | 2 DE-East    | 2 | 5 | 1.130435 | ##### |  |
| 19 | 2 DE | 2020-13 | 2 DE-East    | 3 | 1 | 1.381548 | ##### |  |
| 20 | 2 DE | 2020-13 | 2 DE-East    | 3 | 2 | 1.388889 | ##### |  |
| 21 | 2 DE | 2020-13 | 2 DE-East    | 3 | 3 | 1.434783 | ##### |  |
| 22 | 2 DE | 2020-13 | 2 DE-East    | 3 | 4 | 1.5      | ##### |  |
| 23 | 2 DE | 2020-13 | 2 DE-East    | 3 | 5 | 1.035714 | ##### |  |
| 24 | 2 DE | 2020-13 | 2 DE-North   | 1 | 1 | 1.352185 | ##### |  |
| 25 | 2 DE | 2020-13 | 2 DE-North   | 1 | 2 | 1.59365  | ##### |  |
| 26 | 2 DE | 2020-13 | 2 DE-North   | 1 | 3 | 1.609183 | ##### |  |
| 27 | 2 DE | 2020-13 | 2 DE-North   | 1 | 4 | 1.442043 | ##### |  |
| 28 | 2 DE | 2020-13 | 2 DE-North   | 1 | 5 | #####    | ##### |  |
| 29 | 2 DE | 2020-13 | 2 DE-North   | 2 | 1 | 1.302715 | ##### |  |
| 30 | 2 DE | 2020-13 | 2 DE-North   | 2 | 2 | 1.596774 | ##### |  |
| 31 | 2 DE | 2020-13 | 2 DE-North   | 2 | 3 | 1.795699 | ##### |  |
| 32 | 2 DE | 2020-13 | 2 DE-North   | 2 | 4 | 1.352941 | ##### |  |
| 33 | 2 DE | 2020-13 | 2 DE-North   | 2 | 5 | #####    | ##### |  |
| 34 | 2 DE | 2020-13 | 2 DE-North   | 3 | 1 | 1.407381 | ##### |  |
| 35 | 2 DE | 2020-13 | 2 DE-North   | 3 | 2 | 1.590909 | ##### |  |
| 36 | 2 DE | 2020-13 | 2 DE-North   | 3 | 3 | 1.4      | ##### |  |
| 37 | 2 DE | 2020-13 | 2 DE-North   | 3 | 4 | 1.518987 | ##### |  |
| 38 | 2 DE | 2020-13 | 2 DE-North   | 3 | 5 | 1.162162 | ##### |  |
| 39 | 2 DE | 2020-13 | 2 DE-Overall | 1 | 1 | 1.388385 | ##### |  |
| 40 | 2 DE | 2020-13 | 2 DE-Overall | 1 | 2 | 1.806279 | ##### |  |
| 41 | 2 DE | 2020-13 | 2 DE-Overall | 1 | 3 | 1.646666 | ##### |  |
| 42 | 2 DE | 2020-13 | 2 DE-Overall | 1 | 4 | 1.349323 | ##### |  |
| 43 | 2 DE | 2020-13 | 2 DE-Overall | 1 | 5 | 1.076467 | ##### |  |
| 44 | 2 DE | 2020-13 | 2 DE-Overall | 2 | 1 | 1.35664  | ##### |  |
| 45 | 2 DE | 2020-13 | 2 DE-Overall | 2 | 2 | 1.824169 | ##### |  |
| 46 | 2 DE | 2020-13 | 2 DE-Overall | 2 | 3 | 1.823442 | ##### |  |
| 47 | 2 DE | 2020-13 | 2 DE-Overall | 2 | 4 | 1.253646 | ##### |  |
| 48 | 2 DE | 2020-13 | 2 DE-Overall | 2 | 5 | 1.041416 | ##### |  |
| 49 | 2 DE | 2020-13 | 2 DE-Overall | 3 | 1 | 1.421671 | ##### |  |
| 50 | 2 DE | 2020-13 | 2 DE-Overall | 3 | 2 | 1.79278  | ##### |  |
| 51 | 2 DE | 2020-13 | 2 DE-Overall | 3 | 3 | 1.488147 | ##### |  |
| 52 | 2 DE | 2020-13 | 2 DE-Overall | 3 | 4 | 1.440758 | ##### |  |
| 53 | 2 DE | 2020-13 | 2 DE-Overall | 3 | 5 | 1.12874  | ##### |  |
| 54 | 2 DE | 2020-13 | 2 DE-South   | 1 | 1 | 1.408587 | ##### |  |
| 55 | 2 DE | 2020-13 | 2 DE-South   | 1 | 2 | 1.92153  | ##### |  |
| 56 | 2 DE | 2020-13 | 2 DE-South   | 1 | 3 | 1.57247  | ##### |  |
| 57 | 2 DE | 2020-13 | 2 DE-South   | 1 | 4 | 1.290409 | ##### |  |
| 58 | 2 DE | 2020-13 | 2 DE-South   | 1 | 5 | 1.227612 | ##### |  |
| 59 | 2 DE | 2020-13 | 2 DE-South   | 1 |   |          |       |  |
| 60 | 2 DE | 2020-13 | 2 DE-South   | 1 |   |          |       |  |

|    |      |         |              |   |   |          |       |  |  |
|----|------|---------|--------------|---|---|----------|-------|--|--|
| 1  |      |         |              |   |   |          |       |  |  |
| 2  |      |         |              |   |   |          |       |  |  |
| 3  | 2 DE | 2020-13 | 2 DE-South   | 2 | 1 | 1.365582 | ##### |  |  |
| 4  | 2 DE | 2020-13 | 2 DE-South   | 2 | 2 | 1.962264 | ##### |  |  |
| 5  | 2 DE | 2020-13 | 2 DE-South   | 2 | 3 | 1.816901 | ##### |  |  |
| 6  | 2 DE | 2020-13 | 2 DE-South   | 2 | 4 | 1.068966 | ##### |  |  |
| 7  | 2 DE | 2020-13 | 2 DE-South   | 2 | 5 | 1.25     | ##### |  |  |
| 8  | 2 DE | 2020-13 | 2 DE-South   | 3 | 1 | 1.446495 | ##### |  |  |
| 9  | 2 DE | 2020-13 | 2 DE-South   | 3 | 2 | 1.892857 | ##### |  |  |
| 10 | 2 DE | 2020-13 | 2 DE-South   | 3 | 3 | 1.393443 | ##### |  |  |
| 11 | 2 DE | 2020-13 | 2 DE-South   | 3 | 4 | 1.530303 | ##### |  |  |
| 12 | 2 DE | 2020-13 | 2 DE-South   | 3 | 5 | 1.208333 | ##### |  |  |
| 13 | 2 DE | 2020-13 | 2 DE-West    | 1 | 1 | 1.391339 | ##### |  |  |
| 14 | 2 DE | 2020-13 | 2 DE-West    | 1 | 2 | 1.925591 | ##### |  |  |
| 15 | 2 DE | 2020-13 | 2 DE-West    | 1 | 3 | 1.754829 | ##### |  |  |
| 16 | 2 DE | 2020-13 | 2 DE-West    | 1 | 4 | 1.297988 | ##### |  |  |
| 17 | 2 DE | 2020-13 | 2 DE-West    | 1 | 5 | #####    | ##### |  |  |
| 18 | 2 DE | 2020-13 | 2 DE-West    | 2 | 1 | 1.357123 | ##### |  |  |
| 19 | 2 DE | 2020-13 | 2 DE-West    | 2 | 2 | 1.88     | ##### |  |  |
| 20 | 2 DE | 2020-13 | 2 DE-West    | 2 | 3 | 1.846154 | ##### |  |  |
| 21 | 2 DE | 2020-13 | 2 DE-West    | 2 | 4 | 1.303797 | ##### |  |  |
| 22 | 2 DE | 2020-13 | 2 DE-West    | 2 | 5 | #####    | ##### |  |  |
| 23 | 2 DE | 2020-13 | 2 DE-West    | 3 | 1 | 1.429129 | ##### |  |  |
| 24 | 2 DE | 2020-13 | 2 DE-West    | 3 | 2 | 1.956522 | ##### |  |  |
| 25 | 2 DE | 2020-13 | 2 DE-West    | 3 | 3 | 1.655172 | ##### |  |  |
| 26 | 2 DE | 2020-13 | 2 DE-West    | 3 | 4 | 1.293333 | ##### |  |  |
| 27 | 2 DE | 2020-13 | 2 DE-West    | 3 | 5 | 1.054054 | ##### |  |  |
| 28 | 2 DE | 2020-13 | 3 DE-East    | 1 | 1 | 0        | 0     |  |  |
| 29 | 2 DE | 2020-13 | 3 DE-East    | 1 | 2 | 0        | 0     |  |  |
| 30 | 2 DE | 2020-13 | 3 DE-East    | 1 | 3 | 0        | 0     |  |  |
| 31 | 2 DE | 2020-13 | 3 DE-East    | 1 | 4 | 0        | 0     |  |  |
| 32 | 2 DE | 2020-13 | 3 DE-East    | 1 | 5 | 0        | 0     |  |  |
| 33 | 2 DE | 2020-13 | 3 DE-East    | 2 | 1 | 0        | 0     |  |  |
| 34 | 2 DE | 2020-13 | 3 DE-East    | 2 | 2 | 0        | 0     |  |  |
| 35 | 2 DE | 2020-13 | 3 DE-East    | 2 | 3 | 0        | 0     |  |  |
| 36 | 2 DE | 2020-13 | 3 DE-East    | 2 | 4 | 0        | 0     |  |  |
| 37 | 2 DE | 2020-13 | 3 DE-East    | 2 | 5 | 0        | 0     |  |  |
| 38 | 2 DE | 2020-13 | 3 DE-East    | 3 | 1 | 0        | 0     |  |  |
| 39 | 2 DE | 2020-13 | 3 DE-East    | 3 | 2 | 0        | 0     |  |  |
| 40 | 2 DE | 2020-13 | 3 DE-East    | 3 | 3 | 0        | 0     |  |  |
| 41 | 2 DE | 2020-13 | 3 DE-East    | 3 | 4 | 0        | 0     |  |  |
| 42 | 2 DE | 2020-13 | 3 DE-East    | 3 | 5 | 0        | 0     |  |  |
| 43 | 2 DE | 2020-13 | 3 DE-North   | 1 | 1 | 0        | 0     |  |  |
| 44 | 2 DE | 2020-13 | 3 DE-North   | 1 | 2 | 0        | 0     |  |  |
| 45 | 2 DE | 2020-13 | 3 DE-North   | 1 | 3 | 0        | 0     |  |  |
| 46 | 2 DE | 2020-13 | 3 DE-North   | 1 | 4 | 0        | 0     |  |  |
| 47 | 2 DE | 2020-13 | 3 DE-North   | 1 | 5 | 0        | 0     |  |  |
| 48 | 2 DE | 2020-13 | 3 DE-North   | 2 | 1 | 0        | 0     |  |  |
| 49 | 2 DE | 2020-13 | 3 DE-North   | 2 | 2 | 0        | 0     |  |  |
| 50 | 2 DE | 2020-13 | 3 DE-North   | 2 | 3 | 0        | 0     |  |  |
| 51 | 2 DE | 2020-13 | 3 DE-North   | 2 | 4 | 0        | 0     |  |  |
| 52 | 2 DE | 2020-13 | 3 DE-North   | 2 | 5 | 0        | 0     |  |  |
| 53 | 2 DE | 2020-13 | 3 DE-North   | 3 | 1 | 0        | 0     |  |  |
| 54 | 2 DE | 2020-13 | 3 DE-North   | 3 | 2 | 0        | 0     |  |  |
| 55 | 2 DE | 2020-13 | 3 DE-North   | 3 | 3 | 0        | 0     |  |  |
| 56 | 2 DE | 2020-13 | 3 DE-North   | 3 | 4 | 0        | 0     |  |  |
| 57 | 2 DE | 2020-13 | 3 DE-North   | 3 | 5 | 0        | 0     |  |  |
| 58 | 2 DE | 2020-13 | 3 DE-North   | 3 | 5 | 0        | 0     |  |  |
| 59 | 2 DE | 2020-13 | 3 DE-Overall | 1 | 1 | 0        | 0     |  |  |
| 60 | 2 DE | 2020-13 | 3 DE-Overall | 1 | 1 | 0        | 0     |  |  |

|    |      |         |              |   |   |          |          |  |
|----|------|---------|--------------|---|---|----------|----------|--|
| 1  |      |         |              |   |   |          |          |  |
| 2  |      |         |              |   |   |          |          |  |
| 3  | 2 DE | 2020-13 | 3 DE-Overall | 1 | 2 | 0        | 0        |  |
| 4  | 2 DE | 2020-13 | 3 DE-Overall | 1 | 3 | 0        | 0        |  |
| 5  | 2 DE | 2020-13 | 3 DE-Overall | 1 | 4 | 0        | 0        |  |
| 6  | 2 DE | 2020-13 | 3 DE-Overall | 1 | 5 | 0        | 0        |  |
| 7  | 2 DE | 2020-13 | 3 DE-Overall | 2 | 1 | 0        | 0        |  |
| 8  | 2 DE | 2020-13 | 3 DE-Overall | 2 | 2 | 0        | 0        |  |
| 9  | 2 DE | 2020-13 | 3 DE-Overall | 2 | 3 | 0        | 0        |  |
| 10 | 2 DE | 2020-13 | 3 DE-Overall | 2 | 4 | 0        | 0        |  |
| 11 | 2 DE | 2020-13 | 3 DE-Overall | 2 | 5 | 0        | 0        |  |
| 12 | 2 DE | 2020-13 | 3 DE-Overall | 3 | 1 | 0        | 0        |  |
| 13 | 2 DE | 2020-13 | 3 DE-Overall | 3 | 2 | 0        | 0        |  |
| 14 | 2 DE | 2020-13 | 3 DE-Overall | 3 | 3 | 0        | 0        |  |
| 15 | 2 DE | 2020-13 | 3 DE-Overall | 3 | 4 | 0        | 0        |  |
| 16 | 2 DE | 2020-13 | 3 DE-Overall | 3 | 5 | 0        | 0        |  |
| 17 | 2 DE | 2020-13 | 3 DE-South   | 1 | 1 | 0        | 0        |  |
| 18 | 2 DE | 2020-13 | 3 DE-South   | 1 | 2 | 0        | 0        |  |
| 19 | 2 DE | 2020-13 | 3 DE-South   | 1 | 3 | 0        | 0        |  |
| 20 | 2 DE | 2020-13 | 3 DE-South   | 1 | 4 | 0        | 0        |  |
| 21 | 2 DE | 2020-13 | 3 DE-South   | 1 | 5 | 0        | 0        |  |
| 22 | 2 DE | 2020-13 | 3 DE-South   | 2 | 1 | 0        | 0        |  |
| 23 | 2 DE | 2020-13 | 3 DE-South   | 2 | 2 | 0        | 0        |  |
| 24 | 2 DE | 2020-13 | 3 DE-South   | 2 | 3 | 0        | 0        |  |
| 25 | 2 DE | 2020-13 | 3 DE-South   | 2 | 4 | 0        | 0        |  |
| 26 | 2 DE | 2020-13 | 3 DE-South   | 2 | 5 | 0        | 0        |  |
| 27 | 2 DE | 2020-13 | 3 DE-South   | 3 | 1 | 0        | 0        |  |
| 28 | 2 DE | 2020-13 | 3 DE-South   | 3 | 2 | 0        | 0        |  |
| 29 | 2 DE | 2020-13 | 3 DE-South   | 3 | 3 | 0        | 0        |  |
| 30 | 2 DE | 2020-13 | 3 DE-South   | 3 | 4 | 0        | 0        |  |
| 31 | 2 DE | 2020-13 | 3 DE-South   | 3 | 5 | 0        | 0        |  |
| 32 | 2 DE | 2020-13 | 3 DE-West    | 1 | 1 | 0        | 0        |  |
| 33 | 2 DE | 2020-13 | 3 DE-West    | 1 | 2 | 0        | 0        |  |
| 34 | 2 DE | 2020-13 | 3 DE-West    | 1 | 3 | 0        | 0        |  |
| 35 | 2 DE | 2020-13 | 3 DE-West    | 1 | 4 | 0        | 0        |  |
| 36 | 2 DE | 2020-13 | 3 DE-West    | 1 | 5 | 0        | 0        |  |
| 37 | 2 DE | 2020-13 | 3 DE-West    | 2 | 1 | 0        | 0        |  |
| 38 | 2 DE | 2020-13 | 3 DE-West    | 2 | 2 | 0        | 0        |  |
| 39 | 2 DE | 2020-13 | 3 DE-West    | 2 | 3 | 0        | 0        |  |
| 40 | 2 DE | 2020-13 | 3 DE-West    | 2 | 4 | 0        | 0        |  |
| 41 | 2 DE | 2020-13 | 3 DE-West    | 2 | 5 | 0        | 0        |  |
| 42 | 2 DE | 2020-13 | 3 DE-West    | 3 | 1 | 0        | 0        |  |
| 43 | 2 DE | 2020-13 | 3 DE-West    | 3 | 2 | 0        | 0        |  |
| 44 | 2 DE | 2020-13 | 3 DE-West    | 3 | 3 | 0        | 0        |  |
| 45 | 2 DE | 2020-13 | 3 DE-West    | 3 | 4 | 0        | 0        |  |
| 46 | 2 DE | 2020-13 | 3 DE-West    | 3 | 5 | 0        | 0        |  |
| 47 | 2 DE | 2020-13 | 4 DE-East    | 1 | 1 | 1.54085  | #####    |  |
| 48 | 2 DE | 2020-13 | 4 DE-East    | 1 | 2 | 3.155765 | #####    |  |
| 49 | 2 DE | 2020-13 | 4 DE-East    | 1 | 3 | 2.055631 | #####    |  |
| 50 | 2 DE | 2020-13 | 4 DE-East    | 1 | 4 | 1.893695 | #####    |  |
| 51 | 2 DE | 2020-13 | 4 DE-East    | 1 | 5 | #####    | #####    |  |
| 52 | 2 DE | 2020-13 | 4 DE-East    | 2 | 1 | #####    | #####    |  |
| 53 | 2 DE | 2020-13 | 4 DE-East    | 2 | 2 | 1.346939 | #####    |  |
| 54 | 2 DE | 2020-13 | 4 DE-East    | 2 | 3 | 1.302632 | #####    |  |
| 55 | 2 DE | 2020-13 | 4 DE-East    | 2 | 4 | 1.542056 | #####    |  |
| 56 | 2 DE | 2020-13 | 4 DE-East    | 2 | 5 | #####    | #####    |  |
| 57 | 2 DE | 2020-13 | 4 DE-East    | 3 | 1 | 2.21924  | #####    |  |
| 58 | 2 DE | 2020-13 | 4 DE-East    | 3 | 2 | 4.8      | 1.511048 |  |
| 59 | 2 DE | 2020-13 | 4 DE-East    | 3 | 2 | 4.8      | 1.511048 |  |
| 60 | 2 DE | 2020-13 | 4 DE-East    | 3 | 2 | 4.8      | 1.511048 |  |

|    |      |         |              |   |   |          |       |  |
|----|------|---------|--------------|---|---|----------|-------|--|
| 1  |      |         |              |   |   |          |       |  |
| 2  |      |         |              |   |   |          |       |  |
| 3  | 2 DE | 2020-13 | 4 DE-East    | 3 | 3 | 2.6      | ##### |  |
| 4  | 2 DE | 2020-13 | 4 DE-East    | 3 | 4 | 2.291139 | ##### |  |
| 5  | 2 DE | 2020-13 | 4 DE-East    | 3 | 5 | #####    | ##### |  |
| 6  | 2 DE | 2020-13 | 4 DE-North   | 1 | 1 | 1.468561 | ##### |  |
| 7  | 2 DE | 2020-13 | 4 DE-North   | 1 | 2 | 1.29161  | ##### |  |
| 8  | 2 DE | 2020-13 | 4 DE-North   | 1 | 3 | 1.928773 | ##### |  |
| 9  | 2 DE | 2020-13 | 4 DE-North   | 1 | 4 | 2.698739 | ##### |  |
| 10 | 2 DE | 2020-13 | 4 DE-North   | 1 | 5 | #####    | ##### |  |
| 11 | 2 DE | 2020-13 | 4 DE-North   | 2 | 1 | #####    | ##### |  |
| 12 | 2 DE | 2020-13 | 4 DE-North   | 2 | 2 | 1.046875 | ##### |  |
| 13 | 2 DE | 2020-13 | 4 DE-North   | 2 | 3 | 1.022222 | ##### |  |
| 14 | 2 DE | 2020-13 | 4 DE-North   | 2 | 4 | 1.888889 | ##### |  |
| 15 | 2 DE | 2020-13 | 4 DE-North   | 2 | 5 | #####    | ##### |  |
| 16 | 2 DE | 2020-13 | 4 DE-North   | 3 | 1 | 2.114215 | ##### |  |
| 17 | 2 DE | 2020-13 | 4 DE-North   | 3 | 2 | 1.52381  | ##### |  |
| 18 | 2 DE | 2020-13 | 4 DE-North   | 3 | 3 | 2.891304 | ##### |  |
| 19 | 2 DE | 2020-13 | 4 DE-North   | 3 | 4 | 3.448718 | ##### |  |
| 20 | 2 DE | 2020-13 | 4 DE-North   | 3 | 5 | 0        | 0     |  |
| 21 | 2 DE | 2020-13 | 4 DE-North   | 3 | 5 | 0        | 0     |  |
| 22 | 2 DE | 2020-13 | 4 DE-Overall | 1 | 1 | 1.454135 | ##### |  |
| 23 | 2 DE | 2020-13 | 4 DE-Overall | 1 | 2 | 1.621483 | ##### |  |
| 24 | 2 DE | 2020-13 | 4 DE-Overall | 1 | 3 | 2.167158 | ##### |  |
| 25 | 2 DE | 2020-13 | 4 DE-Overall | 1 | 4 | 2.08532  | ##### |  |
| 26 | 2 DE | 2020-13 | 4 DE-Overall | 1 | 5 | #####    | ##### |  |
| 27 | 2 DE | 2020-13 | 4 DE-Overall | 2 | 1 | 1.113044 | ##### |  |
| 28 | 2 DE | 2020-13 | 4 DE-Overall | 2 | 2 | 1.279591 | ##### |  |
| 29 | 2 DE | 2020-13 | 4 DE-Overall | 2 | 3 | 1.451393 | ##### |  |
| 30 | 2 DE | 2020-13 | 4 DE-Overall | 2 | 4 | 1.859048 | ##### |  |
| 31 | 2 DE | 2020-13 | 4 DE-Overall | 2 | 5 | #####    | ##### |  |
| 32 | 2 DE | 2020-13 | 4 DE-Overall | 3 | 1 | 1.818034 | ##### |  |
| 33 | 2 DE | 2020-13 | 4 DE-Overall | 3 | 2 | 1.89732  | ##### |  |
| 34 | 2 DE | 2020-13 | 4 DE-Overall | 3 | 3 | 2.827649 | ##### |  |
| 35 | 2 DE | 2020-13 | 4 DE-Overall | 3 | 4 | 2.301889 | ##### |  |
| 36 | 2 DE | 2020-13 | 4 DE-Overall | 3 | 5 | #####    | ##### |  |
| 37 | 2 DE | 2020-13 | 4 DE-South   | 1 | 1 | 1.483505 | ##### |  |
| 38 | 2 DE | 2020-13 | 4 DE-South   | 1 | 2 | 1.905471 | ##### |  |
| 39 | 2 DE | 2020-13 | 4 DE-South   | 1 | 3 | 2.110688 | ##### |  |
| 40 | 2 DE | 2020-13 | 4 DE-South   | 1 | 4 | 2.026632 | ##### |  |
| 41 | 2 DE | 2020-13 | 4 DE-South   | 1 | 5 | #####    | ##### |  |
| 42 | 2 DE | 2020-13 | 4 DE-South   | 2 | 1 | 1.433218 | ##### |  |
| 43 | 2 DE | 2020-13 | 4 DE-South   | 2 | 2 | 1.545455 | ##### |  |
| 44 | 2 DE | 2020-13 | 4 DE-South   | 2 | 3 | 1.533333 | ##### |  |
| 45 | 2 DE | 2020-13 | 4 DE-South   | 2 | 4 | 2.147727 | ##### |  |
| 46 | 2 DE | 2020-13 | 4 DE-South   | 2 | 5 | #####    | ##### |  |
| 47 | 2 DE | 2020-13 | 4 DE-South   | 3 | 1 | 1.52977  | ##### |  |
| 48 | 2 DE | 2020-13 | 4 DE-South   | 3 | 2 | 2.2      | ##### |  |
| 49 | 2 DE | 2020-13 | 4 DE-South   | 3 | 3 | 2.557377 | ##### |  |
| 50 | 2 DE | 2020-13 | 4 DE-South   | 3 | 4 | 1.893939 | ##### |  |
| 51 | 2 DE | 2020-13 | 4 DE-South   | 3 | 5 | #####    | ##### |  |
| 52 | 2 DE | 2020-13 | 4 DE-West    | 1 | 1 | 1.374378 | ##### |  |
| 53 | 2 DE | 2020-13 | 4 DE-West    | 1 | 2 | 1.010191 | ##### |  |
| 54 | 2 DE | 2020-13 | 4 DE-West    | 1 | 3 | 2.389723 | ##### |  |
| 55 | 2 DE | 2020-13 | 4 DE-West    | 1 | 4 | 1.93812  | ##### |  |
| 56 | 2 DE | 2020-13 | 4 DE-West    | 1 | 5 | #####    | ##### |  |
| 57 | 2 DE | 2020-13 | 4 DE-West    | 2 | 1 | 1.072232 | ##### |  |
| 58 | 2 DE | 2020-13 | 4 DE-West    | 2 | 2 | 1.196429 | ##### |  |
| 59 | 2 DE | 2020-13 | 4 DE-West    | 2 | 3 | 1.675    | ##### |  |
| 60 | 2 DE | 2020-13 | 4 DE-West    | 2 | 3 | 1.675    | ##### |  |

|    |      |         |              |   |   |          |          |
|----|------|---------|--------------|---|---|----------|----------|
| 1  |      |         |              |   |   |          |          |
| 2  |      |         |              |   |   |          |          |
| 3  | 2 DE | 2020-13 | 4 DE-West    | 2 | 4 | 1.786667 | #####    |
| 4  | 2 DE | 2020-13 | 4 DE-West    | 2 | 5 | #####    | #####    |
| 5  | 2 DE | 2020-13 | 4 DE-West    | 3 | 1 | 1.703061 | #####    |
| 6  | 2 DE | 2020-13 | 4 DE-West    | 3 | 2 | 0.88     | #####    |
| 7  | 2 DE | 2020-13 | 4 DE-West    | 3 | 3 | 3.189655 | #####    |
| 8  | 2 DE | 2020-13 | 4 DE-West    | 3 | 4 | 2.053333 | #####    |
| 9  | 2 DE | 2020-13 | 4 DE-West    | 3 | 5 | #####    | #####    |
| 10 | 2 DE | 2020-13 | 5 DE-East    | 1 | 1 | 1.210143 | #####    |
| 11 | 2 DE | 2020-13 | 5 DE-East    | 1 | 2 | 1.295698 | #####    |
| 12 | 2 DE | 2020-13 | 5 DE-East    | 1 | 3 | 1.22098  | #####    |
| 13 | 2 DE | 2020-13 | 5 DE-East    | 1 | 4 | 1.239205 | #####    |
| 14 | 2 DE | 2020-13 | 5 DE-East    | 1 | 5 | 1.135894 | #####    |
| 15 | 2 DE | 2020-13 | 5 DE-East    | 2 | 1 | 1.16605  | #####    |
| 16 | 2 DE | 2020-13 | 5 DE-East    | 2 | 2 | #####    | #####    |
| 17 | 2 DE | 2020-13 | 5 DE-East    | 2 | 3 | 1.25     | #####    |
| 18 | 2 DE | 2020-13 | 5 DE-East    | 2 | 4 | 1.242424 | #####    |
| 19 | 2 DE | 2020-13 | 5 DE-East    | 2 | 5 | 1.130435 | #####    |
| 20 | 2 DE | 2020-13 | 5 DE-East    | 3 | 1 | 1.264216 | #####    |
| 21 | 2 DE | 2020-13 | 5 DE-East    | 3 | 2 | 1.75     | #####    |
| 22 | 2 DE | 2020-13 | 5 DE-East    | 3 | 3 | 1.2      | #####    |
| 23 | 2 DE | 2020-13 | 5 DE-East    | 3 | 4 | 1.235294 | #####    |
| 24 | 2 DE | 2020-13 | 5 DE-East    | 3 | 5 | 1.148148 | #####    |
| 25 | 2 DE | 2020-13 | 5 DE-East    | 3 | 5 | 1.148148 | #####    |
| 26 | 2 DE | 2020-13 | 5 DE-North   | 1 | 1 | 1.201849 | #####    |
| 27 | 2 DE | 2020-13 | 5 DE-North   | 1 | 2 | 1.036363 | #####    |
| 28 | 2 DE | 2020-13 | 5 DE-North   | 1 | 3 | 1.30752  | #####    |
| 29 | 2 DE | 2020-13 | 5 DE-North   | 1 | 4 | 1.211663 | #####    |
| 30 | 2 DE | 2020-13 | 5 DE-North   | 1 | 5 | 1.185263 | #####    |
| 31 | 2 DE | 2020-13 | 5 DE-North   | 2 | 1 | 1.095322 | #####    |
| 32 | 2 DE | 2020-13 | 5 DE-North   | 2 | 2 | 1.131148 | #####    |
| 33 | 2 DE | 2020-13 | 5 DE-North   | 2 | 3 | 1.097826 | #####    |
| 34 | 2 DE | 2020-13 | 5 DE-North   | 2 | 4 | #####    | #####    |
| 35 | 2 DE | 2020-13 | 5 DE-North   | 2 | 5 | 1.227273 | 0.231483 |
| 36 | 2 DE | 2020-13 | 5 DE-North   | 3 | 1 | 1.318528 | #####    |
| 37 | 2 DE | 2020-13 | 5 DE-North   | 3 | 2 | #####    | #####    |
| 38 | 2 DE | 2020-13 | 5 DE-North   | 3 | 3 | 1.545455 | #####    |
| 39 | 2 DE | 2020-13 | 5 DE-North   | 3 | 4 | 1.468354 | #####    |
| 40 | 2 DE | 2020-13 | 5 DE-North   | 3 | 5 | 1.117647 | #####    |
| 41 | 2 DE | 2020-13 | 5 DE-Overall | 1 | 1 | 1.074985 | #####    |
| 42 | 2 DE | 2020-13 | 5 DE-Overall | 1 | 2 | #####    | #####    |
| 43 | 2 DE | 2020-13 | 5 DE-Overall | 1 | 3 | 1.109485 | #####    |
| 44 | 2 DE | 2020-13 | 5 DE-Overall | 1 | 4 | 1.175723 | #####    |
| 45 | 2 DE | 2020-13 | 5 DE-Overall | 1 | 5 | 1.040991 | #####    |
| 46 | 2 DE | 2020-13 | 5 DE-Overall | 2 | 1 | 1.014659 | #####    |
| 47 | 2 DE | 2020-13 | 5 DE-Overall | 2 | 2 | #####    | #####    |
| 48 | 2 DE | 2020-13 | 5 DE-Overall | 2 | 3 | 1.084307 | #####    |
| 49 | 2 DE | 2020-13 | 5 DE-Overall | 2 | 4 | 1.025333 | #####    |
| 50 | 2 DE | 2020-13 | 5 DE-Overall | 2 | 5 | 1.033278 | #####    |
| 51 | 2 DE | 2020-13 | 5 DE-Overall | 3 | 1 | 1.139306 | #####    |
| 52 | 2 DE | 2020-13 | 5 DE-Overall | 3 | 2 | #####    | #####    |
| 53 | 2 DE | 2020-13 | 5 DE-Overall | 3 | 3 | 1.132431 | #####    |
| 54 | 2 DE | 2020-13 | 5 DE-Overall | 3 | 4 | 1.317478 | #####    |
| 55 | 2 DE | 2020-13 | 5 DE-Overall | 3 | 5 | 1.052948 | #####    |
| 56 | 2 DE | 2020-13 | 5 DE-South   | 1 | 1 | #####    | #####    |
| 57 | 2 DE | 2020-13 | 5 DE-South   | 1 | 2 | #####    | #####    |
| 58 | 2 DE | 2020-13 | 5 DE-South   | 1 | 3 | #####    | #####    |
| 59 | 2 DE | 2020-13 | 5 DE-South   | 1 | 4 | 1.063033 | #####    |
| 60 | 2 DE | 2020-13 | 5 DE-South   | 1 | 4 | 1.063033 | #####    |

|    |      |         |            |   |   |          |          |  |
|----|------|---------|------------|---|---|----------|----------|--|
| 1  |      |         |            |   |   |          |          |  |
| 2  |      |         |            |   |   |          |          |  |
| 3  | 2 DE | 2020-13 | 5 DE-South | 1 | 5 | 1.042314 | #####    |  |
| 4  | 2 DE | 2020-13 | 5 DE-South | 2 | 1 | #####    | #####    |  |
| 5  | 2 DE | 2020-13 | 5 DE-South | 2 | 2 | #####    | #####    |  |
| 6  | 2 DE | 2020-13 | 5 DE-South | 2 | 3 | #####    | #####    |  |
| 7  | 2 DE | 2020-13 | 5 DE-South | 2 | 4 | #####    | #####    |  |
| 8  | 2 DE | 2020-13 | 5 DE-South | 2 | 5 | 1.181818 | #####    |  |
| 9  | 2 DE | 2020-13 | 5 DE-South | 3 | 1 | #####    | #####    |  |
| 10 | 2 DE | 2020-13 | 5 DE-South | 3 | 2 | 0.36     | #####    |  |
| 11 | 2 DE | 2020-13 | 5 DE-South | 3 | 3 | #####    | #####    |  |
| 12 | 2 DE | 2020-13 | 5 DE-South | 3 | 4 | 1.253731 | #####    |  |
| 13 | 2 DE | 2020-13 | 5 DE-South | 3 | 5 | #####    | #####    |  |
| 14 | 2 DE | 2020-13 | 5 DE-West  | 1 | 1 | 1.048351 | #####    |  |
| 15 | 2 DE | 2020-13 | 5 DE-West  | 1 | 2 | #####    | #####    |  |
| 16 | 2 DE | 2020-13 | 5 DE-West  | 1 | 3 | 1.159617 | #####    |  |
| 17 | 2 DE | 2020-13 | 5 DE-West  | 1 | 4 | 1.223881 | #####    |  |
| 18 | 2 DE | 2020-13 | 5 DE-West  | 1 | 5 | #####    | #####    |  |
| 19 | 2 DE | 2020-13 | 5 DE-West  | 2 | 1 | #####    | #####    |  |
| 20 | 2 DE | 2020-13 | 5 DE-West  | 2 | 2 | #####    | #####    |  |
| 21 | 2 DE | 2020-13 | 5 DE-West  | 2 | 3 | 1.12931  | #####    |  |
| 22 | 2 DE | 2020-13 | 5 DE-West  | 2 | 4 | 1.08     | #####    |  |
| 23 | 2 DE | 2020-13 | 5 DE-West  | 2 | 5 | #####    | #####    |  |
| 24 | 2 DE | 2020-13 | 5 DE-West  | 3 | 1 | 1.168377 | #####    |  |
| 25 | 2 DE | 2020-13 | 5 DE-West  | 3 | 2 | #####    | #####    |  |
| 26 | 2 DE | 2020-13 | 5 DE-West  | 3 | 3 | 1.192982 | #####    |  |
| 27 | 2 DE | 2020-13 | 5 DE-West  | 3 | 4 | 1.333333 | #####    |  |
| 28 | 2 DE | 2020-13 | 5 DE-West  | 3 | 5 | 1.138889 | #####    |  |
| 29 | 2 DE | 2020-14 | 1 DE-East  | 1 | 1 | 4.25423  | #####    |  |
| 30 | 2 DE | 2020-14 | 1 DE-East  | 1 | 2 | 5.328625 | #####    |  |
| 31 | 2 DE | 2020-14 | 1 DE-East  | 1 | 3 | 5.361714 | #####    |  |
| 32 | 2 DE | 2020-14 | 1 DE-East  | 1 | 4 | 4.249384 | #####    |  |
| 33 | 2 DE | 2020-14 | 1 DE-East  | 1 | 5 | 2.343396 | #####    |  |
| 34 | 2 DE | 2020-14 | 1 DE-East  | 2 | 1 | 3.786336 | #####    |  |
| 35 | 2 DE | 2020-14 | 1 DE-East  | 2 | 2 | 4.303371 | #####    |  |
| 36 | 2 DE | 2020-14 | 1 DE-East  | 2 | 3 | 5.354839 | #####    |  |
| 37 | 2 DE | 2020-14 | 1 DE-East  | 2 | 4 | 3.865169 | #####    |  |
| 38 | 2 DE | 2020-14 | 1 DE-East  | 2 | 5 | 1.826087 | #####    |  |
| 39 | 2 DE | 2020-14 | 1 DE-East  | 3 | 1 | 4.921017 | #####    |  |
| 40 | 2 DE | 2020-14 | 1 DE-East  | 3 | 2 | 6.175    | 1.006219 |  |
| 41 | 2 DE | 2020-14 | 1 DE-East  | 3 | 3 | 5.372881 | #####    |  |
| 42 | 2 DE | 2020-14 | 1 DE-East  | 3 | 4 | 4.741379 | #####    |  |
| 43 | 2 DE | 2020-14 | 1 DE-East  | 3 | 5 | 3.354839 | #####    |  |
| 44 | 2 DE | 2020-14 | 1 DE-North | 1 | 1 | 4.633274 | #####    |  |
| 45 | 2 DE | 2020-14 | 1 DE-North | 1 | 2 | 5.058637 | #####    |  |
| 46 | 2 DE | 2020-14 | 1 DE-North | 1 | 3 | 6.217235 | #####    |  |
| 47 | 2 DE | 2020-14 | 1 DE-North | 1 | 4 | 4.366488 | #####    |  |
| 48 | 2 DE | 2020-14 | 1 DE-North | 1 | 5 | 2.901359 | #####    |  |
| 49 | 2 DE | 2020-14 | 1 DE-North | 2 | 1 | 4.152664 | #####    |  |
| 50 | 2 DE | 2020-14 | 1 DE-North | 2 | 2 | 4.509434 | #####    |  |
| 51 | 2 DE | 2020-14 | 1 DE-North | 2 | 3 | 5.690141 | #####    |  |
| 52 | 2 DE | 2020-14 | 1 DE-North | 2 | 4 | 3.716981 | #####    |  |
| 53 | 2 DE | 2020-14 | 1 DE-North | 2 | 5 | 2.625    | #####    |  |
| 54 | 2 DE | 2020-14 | 1 DE-North | 3 | 1 | 5.180521 | #####    |  |
| 55 | 2 DE | 2020-14 | 1 DE-North | 3 | 2 | 5.625    | 1.327191 |  |
| 56 | 2 DE | 2020-14 | 1 DE-North | 3 | 3 | 6.929825 | #####    |  |
| 57 | 2 DE | 2020-14 | 1 DE-North | 3 | 4 | 4.949367 | #####    |  |
| 58 | 2 DE | 2020-14 | 1 DE-North | 3 | 5 | 3.263158 | #####    |  |
| 59 | 2 DE | 2020-14 | 1 DE-North | 3 |   |          |          |  |
| 60 | 2 DE | 2020-14 | 1 DE-North | 3 |   |          |          |  |

|    |      |         |              |   |   |          |          |  |
|----|------|---------|--------------|---|---|----------|----------|--|
| 1  |      |         |              |   |   |          |          |  |
| 2  |      |         |              |   |   |          |          |  |
| 3  | 2 DE | 2020-14 | 1 DE-Overall | 1 | 1 | 4.29976  | #####    |  |
| 4  | 2 DE | 2020-14 | 1 DE-Overall | 1 | 2 | 5.113759 | #####    |  |
| 5  | 2 DE | 2020-14 | 1 DE-Overall | 1 | 3 | 5.46892  | #####    |  |
| 6  | 2 DE | 2020-14 | 1 DE-Overall | 1 | 4 | 4.26167  | #####    |  |
| 7  | 2 DE | 2020-14 | 1 DE-Overall | 1 | 5 | 2.318961 | #####    |  |
| 8  | 2 DE | 2020-14 | 1 DE-Overall | 2 | 1 | 3.89877  | #####    |  |
| 9  | 2 DE | 2020-14 | 1 DE-Overall | 2 | 2 | 4.526108 | #####    |  |
| 10 | 2 DE | 2020-14 | 1 DE-Overall | 2 | 3 | 5.288194 | #####    |  |
| 11 | 2 DE | 2020-14 | 1 DE-Overall | 2 | 4 | 3.828041 | #####    |  |
| 12 | 2 DE | 2020-14 | 1 DE-Overall | 2 | 5 | 2.032817 | #####    |  |
| 13 | 2 DE | 2020-14 | 1 DE-Overall | 3 | 1 | 4.834375 | #####    |  |
| 14 | 2 DE | 2020-14 | 1 DE-Overall | 3 | 2 | 5.756864 | #####    |  |
| 15 | 2 DE | 2020-14 | 1 DE-Overall | 3 | 3 | 5.713923 | #####    |  |
| 16 | 2 DE | 2020-14 | 1 DE-Overall | 3 | 4 | 4.77674  | #####    |  |
| 17 | 2 DE | 2020-14 | 1 DE-Overall | 3 | 5 | 2.806754 | #####    |  |
| 18 | 2 DE | 2020-14 | 1 DE-South   | 1 | 1 | 3.988592 | #####    |  |
| 19 | 2 DE | 2020-14 | 1 DE-South   | 1 | 2 | 4.786986 | #####    |  |
| 20 | 2 DE | 2020-14 | 1 DE-South   | 1 | 3 | 5.075485 | #####    |  |
| 21 | 2 DE | 2020-14 | 1 DE-South   | 1 | 4 | 3.509832 | #####    |  |
| 22 | 2 DE | 2020-14 | 1 DE-South   | 1 | 5 | 2.158316 | #####    |  |
| 23 | 2 DE | 2020-14 | 1 DE-South   | 2 | 1 | 3.637599 | #####    |  |
| 24 | 2 DE | 2020-14 | 1 DE-South   | 2 | 2 | 4.651316 | #####    |  |
| 25 | 2 DE | 2020-14 | 1 DE-South   | 2 | 3 | 4.662338 | #####    |  |
| 26 | 2 DE | 2020-14 | 1 DE-South   | 2 | 4 | 3.267857 | #####    |  |
| 27 | 2 DE | 2020-14 | 1 DE-South   | 2 | 5 | 1.846154 | #####    |  |
| 28 | 2 DE | 2020-14 | 1 DE-South   | 3 | 1 | 4.491241 | #####    |  |
| 29 | 2 DE | 2020-14 | 1 DE-South   | 3 | 2 | 5        | #####    |  |
| 30 | 2 DE | 2020-14 | 1 DE-South   | 3 | 3 | 5.582278 | #####    |  |
| 31 | 2 DE | 2020-14 | 1 DE-South   | 3 | 4 | 3.810811 | #####    |  |
| 32 | 2 DE | 2020-14 | 1 DE-South   | 3 | 5 | 2.740741 | #####    |  |
| 33 | 2 DE | 2020-14 | 1 DE-South   | 3 | 5 | 2.740741 | #####    |  |
| 34 | 2 DE | 2020-14 | 1 DE-West    | 1 | 1 | 4.387457 | #####    |  |
| 35 | 2 DE | 2020-14 | 1 DE-West    | 1 | 2 | 5.357254 | #####    |  |
| 36 | 2 DE | 2020-14 | 1 DE-West    | 1 | 3 | 5.491308 | #####    |  |
| 37 | 2 DE | 2020-14 | 1 DE-West    | 1 | 4 | 4.66838  | #####    |  |
| 38 | 2 DE | 2020-14 | 1 DE-West    | 1 | 5 | 2.08646  | #####    |  |
| 39 | 2 DE | 2020-14 | 1 DE-West    | 2 | 1 | 4.048815 | #####    |  |
| 40 | 2 DE | 2020-14 | 1 DE-West    | 2 | 2 | 4.48913  | #####    |  |
| 41 | 2 DE | 2020-14 | 1 DE-West    | 2 | 3 | 5.58046  | #####    |  |
| 42 | 2 DE | 2020-14 | 1 DE-West    | 2 | 4 | 4.197802 | #####    |  |
| 43 | 2 DE | 2020-14 | 1 DE-West    | 2 | 5 | 2        | #####    |  |
| 44 | 2 DE | 2020-14 | 1 DE-West    | 3 | 1 | 4.836836 | #####    |  |
| 45 | 2 DE | 2020-14 | 1 DE-West    | 3 | 2 | 6.16129  | 1.172148 |  |
| 46 | 2 DE | 2020-14 | 1 DE-West    | 3 | 3 | 5.371429 | #####    |  |
| 47 | 2 DE | 2020-14 | 1 DE-West    | 3 | 4 | 5.283019 | #####    |  |
| 48 | 2 DE | 2020-14 | 1 DE-West    | 3 | 5 | 2.235294 | #####    |  |
| 49 | 2 DE | 2020-14 | 2 DE-East    | 1 | 1 | 1.386654 | #####    |  |
| 50 | 2 DE | 2020-14 | 2 DE-East    | 1 | 2 | 1.764598 | #####    |  |
| 51 | 2 DE | 2020-14 | 2 DE-East    | 1 | 3 | 1.556821 | #####    |  |
| 52 | 2 DE | 2020-14 | 2 DE-East    | 1 | 4 | 1.28061  | #####    |  |
| 53 | 2 DE | 2020-14 | 2 DE-East    | 1 | 5 | 1.053882 | #####    |  |
| 54 | 2 DE | 2020-14 | 2 DE-East    | 2 | 1 | 1.392402 | #####    |  |
| 55 | 2 DE | 2020-14 | 2 DE-East    | 2 | 2 | 1.696078 | #####    |  |
| 56 | 2 DE | 2020-14 | 2 DE-East    | 2 | 3 | 1.806818 | #####    |  |
| 57 | 2 DE | 2020-14 | 2 DE-East    | 2 | 4 | 1.213592 | #####    |  |
| 58 | 2 DE | 2020-14 | 2 DE-East    | 2 | 5 | #####    | #####    |  |
| 59 | 2 DE | 2020-14 | 2 DE-East    | 2 | 5 | #####    | #####    |  |
| 60 | 2 DE | 2020-14 | 2 DE-East    | 3 | 1 | 1.378736 | #####    |  |

|    |      |         |              |   |   |          |       |  |
|----|------|---------|--------------|---|---|----------|-------|--|
| 1  |      |         |              |   |   |          |       |  |
| 2  |      |         |              |   |   |          |       |  |
| 3  | 2 DE | 2020-14 | 2 DE-East    | 3 | 2 | 1.822222 | ##### |  |
| 4  | 2 DE | 2020-14 | 2 DE-East    | 3 | 3 | 1.189189 | ##### |  |
| 5  | 2 DE | 2020-14 | 2 DE-East    | 3 | 4 | 1.369231 | ##### |  |
| 6  | 2 DE | 2020-14 | 2 DE-East    | 3 | 5 | 1.228571 | ##### |  |
| 7  | 2 DE | 2020-14 | 2 DE-North   | 1 | 1 | 1.488115 | ##### |  |
| 8  | 2 DE | 2020-14 | 2 DE-North   | 1 | 2 | 1.546846 | ##### |  |
| 9  | 2 DE | 2020-14 | 2 DE-North   | 1 | 3 | 1.669289 | ##### |  |
| 10 | 2 DE | 2020-14 | 2 DE-North   | 1 | 4 | 1.522781 | ##### |  |
| 11 | 2 DE | 2020-14 | 2 DE-North   | 1 | 5 | 1.190476 | ##### |  |
| 12 | 2 DE | 2020-14 | 2 DE-North   | 2 | 1 | 1.497668 | ##### |  |
| 13 | 2 DE | 2020-14 | 2 DE-North   | 2 | 2 | 1.598291 | ##### |  |
| 14 | 2 DE | 2020-14 | 2 DE-North   | 2 | 3 | 1.702532 | ##### |  |
| 15 | 2 DE | 2020-14 | 2 DE-North   | 2 | 4 | 1.5      | ##### |  |
| 16 | 2 DE | 2020-14 | 2 DE-North   | 2 | 5 | 1.190476 | ##### |  |
| 17 | 2 DE | 2020-14 | 2 DE-North   | 3 | 1 | 1.478295 | ##### |  |
| 18 | 2 DE | 2020-14 | 2 DE-North   | 3 | 2 | 1.5      | ##### |  |
| 19 | 2 DE | 2020-14 | 2 DE-North   | 3 | 3 | 1.628571 | ##### |  |
| 20 | 2 DE | 2020-14 | 2 DE-North   | 3 | 4 | 1.540816 | ##### |  |
| 21 | 2 DE | 2020-14 | 2 DE-North   | 3 | 5 | 1.190476 | ##### |  |
| 22 | 2 DE | 2020-14 | 2 DE-Overall | 1 | 1 | 1.492673 | ##### |  |
| 23 | 2 DE | 2020-14 | 2 DE-Overall | 1 | 2 | 1.820107 | ##### |  |
| 24 | 2 DE | 2020-14 | 2 DE-Overall | 1 | 3 | 1.654664 | ##### |  |
| 25 | 2 DE | 2020-14 | 2 DE-Overall | 1 | 4 | 1.461582 | ##### |  |
| 26 | 2 DE | 2020-14 | 2 DE-Overall | 1 | 5 | 1.055995 | ##### |  |
| 27 | 2 DE | 2020-14 | 2 DE-Overall | 2 | 1 | 1.508539 | ##### |  |
| 28 | 2 DE | 2020-14 | 2 DE-Overall | 2 | 2 | 1.879804 | ##### |  |
| 29 | 2 DE | 2020-14 | 2 DE-Overall | 2 | 3 | 1.808331 | ##### |  |
| 30 | 2 DE | 2020-14 | 2 DE-Overall | 2 | 4 | 1.448427 | ##### |  |
| 31 | 2 DE | 2020-14 | 2 DE-Overall | 2 | 5 | #####    | ##### |  |
| 32 | 2 DE | 2020-14 | 2 DE-Overall | 3 | 1 | 1.472301 | ##### |  |
| 33 | 2 DE | 2020-14 | 2 DE-Overall | 3 | 2 | 1.75852  | ##### |  |
| 34 | 2 DE | 2020-14 | 2 DE-Overall | 3 | 3 | 1.449275 | ##### |  |
| 35 | 2 DE | 2020-14 | 2 DE-Overall | 3 | 4 | 1.476741 | ##### |  |
| 36 | 2 DE | 2020-14 | 2 DE-Overall | 3 | 5 | 1.212051 | ##### |  |
| 37 | 2 DE | 2020-14 | 2 DE-South   | 1 | 1 | 1.54917  | ##### |  |
| 38 | 2 DE | 2020-14 | 2 DE-South   | 1 | 2 | 2.015416 | ##### |  |
| 39 | 2 DE | 2020-14 | 2 DE-South   | 1 | 3 | 1.661175 | ##### |  |
| 40 | 2 DE | 2020-14 | 2 DE-South   | 1 | 4 | 1.45802  | ##### |  |
| 41 | 2 DE | 2020-14 | 2 DE-South   | 1 | 5 | 1.010631 | ##### |  |
| 42 | 2 DE | 2020-14 | 2 DE-South   | 2 | 1 | 1.552516 | ##### |  |
| 43 | 2 DE | 2020-14 | 2 DE-South   | 2 | 2 | 2.042683 | ##### |  |
| 44 | 2 DE | 2020-14 | 2 DE-South   | 2 | 3 | 1.797688 | ##### |  |
| 45 | 2 DE | 2020-14 | 2 DE-South   | 2 | 4 | 1.426471 | ##### |  |
| 46 | 2 DE | 2020-14 | 2 DE-South   | 2 | 5 | #####    | ##### |  |
| 47 | 2 DE | 2020-14 | 2 DE-South   | 3 | 1 | 1.544431 | ##### |  |
| 48 | 2 DE | 2020-14 | 2 DE-South   | 3 | 2 | 1.976744 | ##### |  |
| 49 | 2 DE | 2020-14 | 2 DE-South   | 3 | 3 | 1.488372 | ##### |  |
| 50 | 2 DE | 2020-14 | 2 DE-South   | 3 | 4 | 1.5      | ##### |  |
| 51 | 2 DE | 2020-14 | 2 DE-South   | 3 | 5 | 1.214286 | ##### |  |
| 52 | 2 DE | 2020-14 | 2 DE-West    | 1 | 1 | 1.512233 | ##### |  |
| 53 | 2 DE | 2020-14 | 2 DE-West    | 1 | 2 | 1.827024 | ##### |  |
| 54 | 2 DE | 2020-14 | 2 DE-West    | 1 | 3 | 1.697157 | ##### |  |
| 55 | 2 DE | 2020-14 | 2 DE-West    | 1 | 4 | 1.535515 | ##### |  |
| 56 | 2 DE | 2020-14 | 2 DE-West    | 1 | 5 | 1.011259 | ##### |  |
| 57 | 2 DE | 2020-14 | 2 DE-West    | 2 | 1 | 1.547308 | ##### |  |
| 58 | 2 DE | 2020-14 | 2 DE-West    | 2 | 2 | 1.95098  | ##### |  |
| 59 | 2 DE | 2020-14 | 2 DE-West    | 2 | 2 | 1.95098  | ##### |  |
| 60 | 2 DE | 2020-14 | 2 DE-West    | 2 | 2 | 1.95098  | ##### |  |



|    |      |         |              |   |   |          |       |  |
|----|------|---------|--------------|---|---|----------|-------|--|
| 1  |      |         |              |   |   |          |       |  |
| 2  |      |         |              |   |   |          |       |  |
| 3  | 2 DE | 2020-14 | 2 DE-West    | 2 | 3 | 1.870192 | ##### |  |
| 4  | 2 DE | 2020-14 | 2 DE-West    | 2 | 4 | 1.584158 | ##### |  |
| 5  | 2 DE | 2020-14 | 2 DE-West    | 2 | 5 | #####    | ##### |  |
| 6  | 2 DE | 2020-14 | 2 DE-West    | 3 | 1 | 1.466625 | ##### |  |
| 7  | 2 DE | 2020-14 | 2 DE-West    | 3 | 2 | 1.714286 | ##### |  |
| 8  | 2 DE | 2020-14 | 2 DE-West    | 3 | 3 | 1.45679  | ##### |  |
| 9  | 2 DE | 2020-14 | 2 DE-West    | 3 | 4 | 1.47619  | ##### |  |
| 10 | 2 DE | 2020-14 | 2 DE-West    | 3 | 5 | 1.216216 | ##### |  |
| 11 | 2 DE | 2020-14 | 3 DE-East    | 1 | 1 | 0        | 0     |  |
| 12 | 2 DE | 2020-14 | 3 DE-East    | 1 | 2 | 0        | 0     |  |
| 13 | 2 DE | 2020-14 | 3 DE-East    | 1 | 3 | 0        | 0     |  |
| 14 | 2 DE | 2020-14 | 3 DE-East    | 1 | 4 | 0        | 0     |  |
| 15 | 2 DE | 2020-14 | 3 DE-East    | 1 | 5 | 0        | 0     |  |
| 16 | 2 DE | 2020-14 | 3 DE-East    | 2 | 1 | 0        | 0     |  |
| 17 | 2 DE | 2020-14 | 3 DE-East    | 2 | 2 | 0        | 0     |  |
| 18 | 2 DE | 2020-14 | 3 DE-East    | 2 | 3 | 0        | 0     |  |
| 19 | 2 DE | 2020-14 | 3 DE-East    | 2 | 4 | 0        | 0     |  |
| 20 | 2 DE | 2020-14 | 3 DE-East    | 2 | 5 | 0        | 0     |  |
| 21 | 2 DE | 2020-14 | 3 DE-East    | 2 | 5 | 0        | 0     |  |
| 22 | 2 DE | 2020-14 | 3 DE-East    | 3 | 1 | 0        | 0     |  |
| 23 | 2 DE | 2020-14 | 3 DE-East    | 3 | 2 | 0        | 0     |  |
| 24 | 2 DE | 2020-14 | 3 DE-East    | 3 | 3 | 0        | 0     |  |
| 25 | 2 DE | 2020-14 | 3 DE-East    | 3 | 4 | 0        | 0     |  |
| 26 | 2 DE | 2020-14 | 3 DE-East    | 3 | 5 | 0        | 0     |  |
| 27 | 2 DE | 2020-14 | 3 DE-North   | 1 | 1 | 0        | 0     |  |
| 28 | 2 DE | 2020-14 | 3 DE-North   | 1 | 2 | 0        | 0     |  |
| 29 | 2 DE | 2020-14 | 3 DE-North   | 1 | 3 | 0        | 0     |  |
| 30 | 2 DE | 2020-14 | 3 DE-North   | 1 | 4 | 0        | 0     |  |
| 31 | 2 DE | 2020-14 | 3 DE-North   | 1 | 5 | 0        | 0     |  |
| 32 | 2 DE | 2020-14 | 3 DE-North   | 2 | 1 | 0        | 0     |  |
| 33 | 2 DE | 2020-14 | 3 DE-North   | 2 | 2 | 0        | 0     |  |
| 34 | 2 DE | 2020-14 | 3 DE-North   | 2 | 3 | 0        | 0     |  |
| 35 | 2 DE | 2020-14 | 3 DE-North   | 2 | 4 | 0        | 0     |  |
| 36 | 2 DE | 2020-14 | 3 DE-North   | 2 | 5 | 0        | 0     |  |
| 37 | 2 DE | 2020-14 | 3 DE-North   | 3 | 1 | 0        | 0     |  |
| 38 | 2 DE | 2020-14 | 3 DE-North   | 3 | 2 | 0        | 0     |  |
| 39 | 2 DE | 2020-14 | 3 DE-North   | 3 | 3 | 0        | 0     |  |
| 40 | 2 DE | 2020-14 | 3 DE-North   | 3 | 4 | 0        | 0     |  |
| 41 | 2 DE | 2020-14 | 3 DE-North   | 3 | 5 | 0        | 0     |  |
| 42 | 2 DE | 2020-14 | 3 DE-Overall | 1 | 1 | 0        | 0     |  |
| 43 | 2 DE | 2020-14 | 3 DE-Overall | 1 | 2 | 0        | 0     |  |
| 44 | 2 DE | 2020-14 | 3 DE-Overall | 1 | 3 | 0        | 0     |  |
| 45 | 2 DE | 2020-14 | 3 DE-Overall | 1 | 4 | 0        | 0     |  |
| 46 | 2 DE | 2020-14 | 3 DE-Overall | 1 | 5 | 0        | 0     |  |
| 47 | 2 DE | 2020-14 | 3 DE-Overall | 2 | 1 | 0        | 0     |  |
| 48 | 2 DE | 2020-14 | 3 DE-Overall | 2 | 2 | 0        | 0     |  |
| 49 | 2 DE | 2020-14 | 3 DE-Overall | 2 | 3 | 0        | 0     |  |
| 50 | 2 DE | 2020-14 | 3 DE-Overall | 2 | 4 | 0        | 0     |  |
| 51 | 2 DE | 2020-14 | 3 DE-Overall | 2 | 5 | 0        | 0     |  |
| 52 | 2 DE | 2020-14 | 3 DE-Overall | 3 | 1 | 0        | 0     |  |
| 53 | 2 DE | 2020-14 | 3 DE-Overall | 3 | 2 | 0        | 0     |  |
| 54 | 2 DE | 2020-14 | 3 DE-Overall | 3 | 3 | 0        | 0     |  |
| 55 | 2 DE | 2020-14 | 3 DE-Overall | 3 | 4 | 0        | 0     |  |
| 56 | 2 DE | 2020-14 | 3 DE-Overall | 3 | 5 | 0        | 0     |  |
| 57 | 2 DE | 2020-14 | 3 DE-South   | 1 | 1 | 0        | 0     |  |
| 58 | 2 DE | 2020-14 | 3 DE-South   | 1 | 2 | 0        | 0     |  |
| 59 | 2 DE | 2020-14 | 3 DE-South   | 1 | 3 | 0        | 0     |  |
| 60 | 2 DE | 2020-14 | 3 DE-South   | 1 | 3 | 0        | 0     |  |

|    |      |         |            |   |   |          |          |  |
|----|------|---------|------------|---|---|----------|----------|--|
| 1  |      |         |            |   |   |          |          |  |
| 2  |      |         |            |   |   |          |          |  |
| 3  | 2 DE | 2020-14 | 3 DE-South | 1 | 4 | 0        | 0        |  |
| 4  | 2 DE | 2020-14 | 3 DE-South | 1 | 5 | 0        | 0        |  |
| 5  | 2 DE | 2020-14 | 3 DE-South | 2 | 1 | 0        | 0        |  |
| 6  | 2 DE | 2020-14 | 3 DE-South | 2 | 2 | 0        | 0        |  |
| 7  | 2 DE | 2020-14 | 3 DE-South | 2 | 3 | 0        | 0        |  |
| 8  | 2 DE | 2020-14 | 3 DE-South | 2 | 4 | 0        | 0        |  |
| 9  | 2 DE | 2020-14 | 3 DE-South | 2 | 5 | 0        | 0        |  |
| 10 | 2 DE | 2020-14 | 3 DE-South | 3 | 1 | 0        | 0        |  |
| 11 | 2 DE | 2020-14 | 3 DE-South | 3 | 2 | 0        | 0        |  |
| 12 | 2 DE | 2020-14 | 3 DE-South | 3 | 3 | 0        | 0        |  |
| 13 | 2 DE | 2020-14 | 3 DE-South | 3 | 4 | 0        | 0        |  |
| 14 | 2 DE | 2020-14 | 3 DE-South | 3 | 5 | 0        | 0        |  |
| 15 | 2 DE | 2020-14 | 3 DE-West  | 1 | 1 | 0        | 0        |  |
| 16 | 2 DE | 2020-14 | 3 DE-West  | 1 | 2 | 0        | 0        |  |
| 17 | 2 DE | 2020-14 | 3 DE-West  | 1 | 3 | 0        | 0        |  |
| 18 | 2 DE | 2020-14 | 3 DE-West  | 1 | 4 | 0        | 0        |  |
| 19 | 2 DE | 2020-14 | 3 DE-West  | 1 | 5 | 0        | 0        |  |
| 20 | 2 DE | 2020-14 | 3 DE-West  | 2 | 1 | 0        | 0        |  |
| 21 | 2 DE | 2020-14 | 3 DE-West  | 2 | 2 | 0        | 0        |  |
| 22 | 2 DE | 2020-14 | 3 DE-West  | 2 | 3 | 0        | 0        |  |
| 23 | 2 DE | 2020-14 | 3 DE-West  | 2 | 4 | 0        | 0        |  |
| 24 | 2 DE | 2020-14 | 3 DE-West  | 2 | 5 | 0        | 0        |  |
| 25 | 2 DE | 2020-14 | 3 DE-West  | 3 | 1 | 0        | 0        |  |
| 26 | 2 DE | 2020-14 | 3 DE-West  | 3 | 2 | 0        | 0        |  |
| 27 | 2 DE | 2020-14 | 3 DE-West  | 3 | 3 | 0        | 0        |  |
| 28 | 2 DE | 2020-14 | 3 DE-West  | 3 | 4 | 0        | 0        |  |
| 29 | 2 DE | 2020-14 | 3 DE-West  | 3 | 5 | 0        | 0        |  |
| 30 | 2 DE | 2020-14 | 4 DE-East  | 1 | 1 | 2.0373   | #####    |  |
| 31 | 2 DE | 2020-14 | 4 DE-East  | 1 | 2 | 2.466197 | #####    |  |
| 32 | 2 DE | 2020-14 | 4 DE-East  | 1 | 3 | 3.090119 | #####    |  |
| 33 | 2 DE | 2020-14 | 4 DE-East  | 1 | 4 | 2.419761 | #####    |  |
| 34 | 2 DE | 2020-14 | 4 DE-East  | 1 | 5 | #####    | #####    |  |
| 35 | 2 DE | 2020-14 | 4 DE-East  | 2 | 1 | 1.682556 | #####    |  |
| 36 | 2 DE | 2020-14 | 4 DE-East  | 2 | 2 | 2.02     | #####    |  |
| 37 | 2 DE | 2020-14 | 4 DE-East  | 2 | 3 | 2.629834 | #####    |  |
| 38 | 2 DE | 2020-14 | 4 DE-East  | 2 | 4 | 2.117647 | #####    |  |
| 39 | 2 DE | 2020-14 | 4 DE-East  | 2 | 5 | 0.04     | #####    |  |
| 40 | 2 DE | 2020-14 | 4 DE-East  | 3 | 1 | 2.53249  | #####    |  |
| 41 | 2 DE | 2020-14 | 4 DE-East  | 3 | 2 | 2.826087 | #####    |  |
| 42 | 2 DE | 2020-14 | 4 DE-East  | 3 | 3 | 3.805556 | #####    |  |
| 43 | 2 DE | 2020-14 | 4 DE-East  | 3 | 4 | 2.815385 | #####    |  |
| 44 | 2 DE | 2020-14 | 4 DE-East  | 3 | 5 | #####    | #####    |  |
| 45 | 2 DE | 2020-14 | 4 DE-North | 1 | 1 | 2.376128 | #####    |  |
| 46 | 2 DE | 2020-14 | 4 DE-North | 1 | 2 | 3.011712 | #####    |  |
| 47 | 2 DE | 2020-14 | 4 DE-North | 1 | 3 | 3.306446 | #####    |  |
| 48 | 2 DE | 2020-14 | 4 DE-North | 1 | 4 | 2.303645 | #####    |  |
| 49 | 2 DE | 2020-14 | 4 DE-North | 1 | 5 | #####    | #####    |  |
| 50 | 2 DE | 2020-14 | 4 DE-North | 2 | 1 | 1.70566  | #####    |  |
| 51 | 2 DE | 2020-14 | 4 DE-North | 2 | 2 | 2.016949 | #####    |  |
| 52 | 2 DE | 2020-14 | 4 DE-North | 2 | 3 | 2.573248 | #####    |  |
| 53 | 2 DE | 2020-14 | 4 DE-North | 2 | 4 | 1.631579 | #####    |  |
| 54 | 2 DE | 2020-14 | 4 DE-North | 2 | 5 | #####    | #####    |  |
| 55 | 2 DE | 2020-14 | 4 DE-North | 3 | 1 | 3.082259 | #####    |  |
| 56 | 2 DE | 2020-14 | 4 DE-North | 3 | 2 | 3.948718 | 1.210343 |  |
| 57 | 2 DE | 2020-14 | 4 DE-North | 3 | 3 | 4.238806 | #####    |  |
| 58 | 2 DE | 2020-14 | 4 DE-North | 3 | 4 | 2.826531 | #####    |  |
| 59 | 2 DE | 2020-14 | 4 DE-North | 3 |   |          |          |  |
| 60 | 2 DE | 2020-14 | 4 DE-North | 3 |   |          |          |  |

|    |      |         |              |   |   |          |       |  |
|----|------|---------|--------------|---|---|----------|-------|--|
| 1  |      |         |              |   |   |          |       |  |
| 2  |      |         |              |   |   |          |       |  |
| 3  | 2 DE | 2020-14 | 4 DE-North   | 3 | 5 | 1.380952 | ##### |  |
| 4  | 2 DE | 2020-14 | 4 DE-Overall | 1 | 1 | 1.91581  | ##### |  |
| 5  | 2 DE | 2020-14 | 4 DE-Overall | 1 | 2 | 2.361779 | ##### |  |
| 6  | 2 DE | 2020-14 | 4 DE-Overall | 1 | 3 | 2.884538 | ##### |  |
| 7  | 2 DE | 2020-14 | 4 DE-Overall | 1 | 4 | 1.997508 | ##### |  |
| 8  | 2 DE | 2020-14 | 4 DE-Overall | 1 | 5 | #####    | ##### |  |
| 9  | 2 DE | 2020-14 | 4 DE-Overall | 2 | 1 | 1.520432 | ##### |  |
| 10 | 2 DE | 2020-14 | 4 DE-Overall | 2 | 2 | 1.871892 | ##### |  |
| 11 | 2 DE | 2020-14 | 4 DE-Overall | 2 | 3 | 2.398548 | ##### |  |
| 12 | 2 DE | 2020-14 | 4 DE-Overall | 2 | 4 | 1.682718 | ##### |  |
| 13 | 2 DE | 2020-14 | 4 DE-Overall | 2 | 5 | #####    | ##### |  |
| 14 | 2 DE | 2020-14 | 4 DE-Overall | 3 | 1 | 2.426511 | ##### |  |
| 15 | 2 DE | 2020-14 | 4 DE-Overall | 3 | 2 | 2.841468 | ##### |  |
| 16 | 2 DE | 2020-14 | 4 DE-Overall | 3 | 3 | 3.542802 | ##### |  |
| 17 | 2 DE | 2020-14 | 4 DE-Overall | 3 | 4 | 2.362094 | ##### |  |
| 18 | 2 DE | 2020-14 | 4 DE-Overall | 3 | 5 | #####    | ##### |  |
| 19 | 2 DE | 2020-14 | 4 DE-South   | 1 | 1 | 1.599014 | ##### |  |
| 20 | 2 DE | 2020-14 | 4 DE-South   | 1 | 2 | 1.799411 | ##### |  |
| 21 | 2 DE | 2020-14 | 4 DE-South   | 1 | 3 | 2.637456 | ##### |  |
| 22 | 2 DE | 2020-14 | 4 DE-South   | 1 | 4 | 1.381518 | ##### |  |
| 23 | 2 DE | 2020-14 | 4 DE-South   | 1 | 5 | #####    | ##### |  |
| 24 | 2 DE | 2020-14 | 4 DE-South   | 2 | 1 | 1.224947 | ##### |  |
| 25 | 2 DE | 2020-14 | 4 DE-South   | 2 | 2 | 1.598837 | ##### |  |
| 26 | 2 DE | 2020-14 | 4 DE-South   | 2 | 3 | 1.971098 | ##### |  |
| 27 | 2 DE | 2020-14 | 4 DE-South   | 2 | 4 | 1.234375 | ##### |  |
| 28 | 2 DE | 2020-14 | 4 DE-South   | 2 | 5 | 0        | 0     |  |
| 29 | 2 DE | 2020-14 | 4 DE-South   | 3 | 1 | 2.128613 | ##### |  |
| 30 | 2 DE | 2020-14 | 4 DE-South   | 3 | 2 | 2.061224 | ##### |  |
| 31 | 2 DE | 2020-14 | 4 DE-South   | 3 | 3 | 3.471264 | ##### |  |
| 32 | 2 DE | 2020-14 | 4 DE-South   | 3 | 4 | 1.575    | ##### |  |
| 33 | 2 DE | 2020-14 | 4 DE-South   | 3 | 5 | 0.25     | ##### |  |
| 34 | 2 DE | 2020-14 | 4 DE-West    | 1 | 1 | 1.835411 | ##### |  |
| 35 | 2 DE | 2020-14 | 4 DE-West    | 1 | 2 | 2.503878 | ##### |  |
| 36 | 2 DE | 2020-14 | 4 DE-West    | 1 | 3 | 2.759119 | ##### |  |
| 37 | 2 DE | 2020-14 | 4 DE-West    | 1 | 4 | 1.927408 | ##### |  |
| 38 | 2 DE | 2020-14 | 4 DE-West    | 1 | 5 | #####    | ##### |  |
| 39 | 2 DE | 2020-14 | 4 DE-West    | 2 | 1 | 1.574139 | ##### |  |
| 40 | 2 DE | 2020-14 | 4 DE-West    | 2 | 2 | 2.06     | ##### |  |
| 41 | 2 DE | 2020-14 | 4 DE-West    | 2 | 3 | 2.53     | ##### |  |
| 42 | 2 DE | 2020-14 | 4 DE-West    | 2 | 4 | 1.715686 | ##### |  |
| 43 | 2 DE | 2020-14 | 4 DE-West    | 2 | 5 | #####    | ##### |  |
| 44 | 2 DE | 2020-14 | 4 DE-West    | 3 | 1 | 2.172971 | ##### |  |
| 45 | 2 DE | 2020-14 | 4 DE-West    | 3 | 2 | 2.868421 | ##### |  |
| 46 | 2 DE | 2020-14 | 4 DE-West    | 3 | 3 | 3.076923 | ##### |  |
| 47 | 2 DE | 2020-14 | 4 DE-West    | 3 | 4 | 2.196721 | ##### |  |
| 48 | 2 DE | 2020-14 | 4 DE-West    | 3 | 5 | #####    | ##### |  |
| 49 | 2 DE | 2020-14 | 5 DE-East    | 1 | 1 | 1.229629 | ##### |  |
| 50 | 2 DE | 2020-14 | 5 DE-East    | 1 | 2 | 1.159119 | ##### |  |
| 51 | 2 DE | 2020-14 | 5 DE-East    | 1 | 3 | 1.18225  | ##### |  |
| 52 | 2 DE | 2020-14 | 5 DE-East    | 1 | 4 | 1.268366 | ##### |  |
| 53 | 2 DE | 2020-14 | 5 DE-East    | 1 | 5 | 1.291898 | ##### |  |
| 54 | 2 DE | 2020-14 | 5 DE-East    | 2 | 1 | 1.040259 | ##### |  |
| 55 | 2 DE | 2020-14 | 5 DE-East    | 2 | 2 | #####    | ##### |  |
| 56 | 2 DE | 2020-14 | 5 DE-East    | 2 | 3 | 1.165714 | ##### |  |
| 57 | 2 DE | 2020-14 | 5 DE-East    | 2 | 4 | 1.097826 | ##### |  |
| 58 | 2 DE | 2020-14 | 5 DE-East    | 2 | 5 | 0.875    | ##### |  |
| 59 | 2 DE | 2020-14 | 5 DE-East    | 2 |   |          |       |  |
| 60 | 2 DE | 2020-14 | 5 DE-East    | 2 |   |          |       |  |

|    |      |         |              |   |   |          |       |  |
|----|------|---------|--------------|---|---|----------|-------|--|
| 1  |      |         |              |   |   |          |       |  |
| 2  |      |         |              |   |   |          |       |  |
| 3  | 2 DE | 2020-14 | 5 DE-East    | 3 | 1 | 1.492205 | ##### |  |
| 4  | 2 DE | 2020-14 | 5 DE-East    | 3 | 2 | 1.311111 | ##### |  |
| 5  | 2 DE | 2020-14 | 5 DE-East    | 3 | 3 | 1.208955 | ##### |  |
| 6  | 2 DE | 2020-14 | 5 DE-East    | 3 | 4 | 1.47619  | ##### |  |
| 7  | 2 DE | 2020-14 | 5 DE-East    | 3 | 5 | 2.090909 | ##### |  |
| 8  | 2 DE | 2020-14 | 5 DE-North   | 1 | 1 | 1.137564 | ##### |  |
| 9  | 2 DE | 2020-14 | 5 DE-North   | 1 | 2 | 1.085442 | ##### |  |
| 10 | 2 DE | 2020-14 | 5 DE-North   | 1 | 3 | 1.311555 | ##### |  |
| 11 | 2 DE | 2020-14 | 5 DE-North   | 1 | 4 | 1.153317 | ##### |  |
| 12 | 2 DE | 2020-14 | 5 DE-North   | 1 | 5 | #####    | ##### |  |
| 13 | 2 DE | 2020-14 | 5 DE-North   | 2 | 1 | 1.01777  | ##### |  |
| 14 | 2 DE | 2020-14 | 5 DE-North   | 2 | 2 | 1.282051 | ##### |  |
| 15 | 2 DE | 2020-14 | 5 DE-North   | 2 | 3 | 1.10559  | ##### |  |
| 16 | 2 DE | 2020-14 | 5 DE-North   | 2 | 4 | #####    | ##### |  |
| 17 | 2 DE | 2020-14 | 5 DE-North   | 2 | 5 | #####    | ##### |  |
| 18 | 2 DE | 2020-14 | 5 DE-North   | 3 | 1 | 1.272786 | ##### |  |
| 19 | 2 DE | 2020-14 | 5 DE-North   | 3 | 2 | #####    | ##### |  |
| 20 | 2 DE | 2020-14 | 5 DE-North   | 3 | 3 | 1.606557 | ##### |  |
| 21 | 2 DE | 2020-14 | 5 DE-North   | 3 | 4 | 1.364706 | ##### |  |
| 22 | 2 DE | 2020-14 | 5 DE-North   | 3 | 5 | 1.125    | ##### |  |
| 23 | 2 DE | 2020-14 | 5 DE-Overall | 1 | 1 | 1.089752 | ##### |  |
| 24 | 2 DE | 2020-14 | 5 DE-Overall | 1 | 2 | 1.045745 | ##### |  |
| 25 | 2 DE | 2020-14 | 5 DE-Overall | 1 | 3 | 1.051501 | ##### |  |
| 26 | 2 DE | 2020-14 | 5 DE-Overall | 1 | 4 | 1.170672 | ##### |  |
| 27 | 2 DE | 2020-14 | 5 DE-Overall | 1 | 5 | 1.092552 | ##### |  |
| 28 | 2 DE | 2020-14 | 5 DE-Overall | 2 | 1 | #####    | ##### |  |
| 29 | 2 DE | 2020-14 | 5 DE-Overall | 2 | 2 | 1.064608 | ##### |  |
| 30 | 2 DE | 2020-14 | 5 DE-Overall | 2 | 3 | 1.042698 | ##### |  |
| 31 | 2 DE | 2020-14 | 5 DE-Overall | 2 | 4 | #####    | ##### |  |
| 32 | 2 DE | 2020-14 | 5 DE-Overall | 2 | 5 | #####    | ##### |  |
| 33 | 2 DE | 2020-14 | 5 DE-Overall | 3 | 1 | 1.210367 | ##### |  |
| 34 | 2 DE | 2020-14 | 5 DE-Overall | 3 | 2 | 1.027259 | ##### |  |
| 35 | 2 DE | 2020-14 | 5 DE-Overall | 3 | 3 | 1.064152 | ##### |  |
| 36 | 2 DE | 2020-14 | 5 DE-Overall | 3 | 4 | 1.384556 | ##### |  |
| 37 | 2 DE | 2020-14 | 5 DE-Overall | 3 | 5 | 1.400065 | ##### |  |
| 38 | 2 DE | 2020-14 | 5 DE-South   | 1 | 1 | #####    | ##### |  |
| 39 | 2 DE | 2020-14 | 5 DE-South   | 1 | 2 | #####    | ##### |  |
| 40 | 2 DE | 2020-14 | 5 DE-South   | 1 | 3 | #####    | ##### |  |
| 41 | 2 DE | 2020-14 | 5 DE-South   | 1 | 4 | 1.091875 | ##### |  |
| 42 | 2 DE | 2020-14 | 5 DE-South   | 1 | 5 | 1.0389   | ##### |  |
| 43 | 2 DE | 2020-14 | 5 DE-South   | 2 | 1 | #####    | ##### |  |
| 44 | 2 DE | 2020-14 | 5 DE-South   | 2 | 2 | 1.083333 | ##### |  |
| 45 | 2 DE | 2020-14 | 5 DE-South   | 2 | 3 | #####    | ##### |  |
| 46 | 2 DE | 2020-14 | 5 DE-South   | 2 | 4 | #####    | ##### |  |
| 47 | 2 DE | 2020-14 | 5 DE-South   | 2 | 5 | #####    | ##### |  |
| 48 | 2 DE | 2020-14 | 5 DE-South   | 3 | 1 | 1.043784 | ##### |  |
| 49 | 2 DE | 2020-14 | 5 DE-South   | 3 | 2 | #####    | ##### |  |
| 50 | 2 DE | 2020-14 | 5 DE-South   | 3 | 3 | #####    | ##### |  |
| 51 | 2 DE | 2020-14 | 5 DE-South   | 3 | 4 | 1.25     | ##### |  |
| 52 | 2 DE | 2020-14 | 5 DE-South   | 3 | 5 | 1.392857 | ##### |  |
| 53 | 2 DE | 2020-14 | 5 DE-West    | 1 | 1 | 1.081709 | ##### |  |
| 54 | 2 DE | 2020-14 | 5 DE-West    | 1 | 2 | 1.019766 | ##### |  |
| 55 | 2 DE | 2020-14 | 5 DE-West    | 1 | 3 | 1.035808 | ##### |  |
| 56 | 2 DE | 2020-14 | 5 DE-West    | 1 | 4 | 1.172183 | ##### |  |
| 57 | 2 DE | 2020-14 | 5 DE-West    | 1 | 5 | 1.093512 | ##### |  |
| 58 | 2 DE | 2020-14 | 5 DE-West    | 2 | 1 | 1.03273  | ##### |  |
| 59 | 2 DE | 2020-14 | 5 DE-West    | 2 |   |          |       |  |
| 60 | 2 DE | 2020-14 | 5 DE-West    | 2 |   |          |       |  |

|    |      |         |              |   |   |          |         |
|----|------|---------|--------------|---|---|----------|---------|
| 1  |      |         |              |   |   |          |         |
| 2  |      |         |              |   |   |          |         |
| 3  | 2 DE | 2020-14 | 5 DE-West    | 2 | 2 | #####    | #####   |
| 4  | 2 DE | 2020-14 | 5 DE-West    | 2 | 3 | 1.125    | #####   |
| 5  | 2 DE | 2020-14 | 5 DE-West    | 2 | 4 | #####    | #####   |
| 6  | 2 DE | 2020-14 | 5 DE-West    | 2 | 5 | 1.018868 | #####   |
| 7  | 2 DE | 2020-14 | 5 DE-West    | 3 | 1 | 1.14515  | #####   |
| 8  | 2 DE | 2020-14 | 5 DE-West    | 3 | 2 | 1.073171 | #####   |
| 9  | 2 DE | 2020-14 | 5 DE-West    | 3 | 3 | #####    | #####   |
| 10 | 2 DE | 2020-14 | 5 DE-West    | 3 | 4 | 1.428571 | #####   |
| 11 | 2 DE | 2020-14 | 5 DE-West    | 3 | 5 | 1.216216 | #####   |
| 12 | 2 DE | 2020-15 | 1 DE-East    | 1 | 1 | 4.21693  | #####   |
| 13 | 2 DE | 2020-15 | 1 DE-East    | 1 | 2 | 4.982039 | #####   |
| 14 | 2 DE | 2020-15 | 1 DE-East    | 1 | 3 | 5.055098 | #####   |
| 15 | 2 DE | 2020-15 | 1 DE-East    | 1 | 4 | 4.583545 | #####   |
| 16 | 2 DE | 2020-15 | 1 DE-East    | 1 | 5 | 2.562793 | #####   |
| 17 | 2 DE | 2020-15 | 1 DE-East    | 2 | 1 | 4.197827 | #####   |
| 18 | 2 DE | 2020-15 | 1 DE-East    | 2 | 2 | 5.75     | #####   |
| 19 | 2 DE | 2020-15 | 1 DE-East    | 2 | 3 | 5.304636 | #####   |
| 20 | 2 DE | 2020-15 | 1 DE-East    | 2 | 4 | 4.202247 | #####   |
| 21 | 2 DE | 2020-15 | 1 DE-East    | 2 | 5 | 2.521739 | #####   |
| 22 | 2 DE | 2020-15 | 1 DE-East    | 3 | 1 | 4.240179 | #####   |
| 23 | 2 DE | 2020-15 | 1 DE-East    | 3 | 2 | 4.222222 | #####   |
| 24 | 2 DE | 2020-15 | 1 DE-East    | 3 | 3 | 4.75641  | #####   |
| 25 | 2 DE | 2020-15 | 1 DE-East    | 3 | 4 | 5        | #####   |
| 26 | 2 DE | 2020-15 | 1 DE-East    | 3 | 5 | 2.625    | #####   |
| 27 | 2 DE | 2020-15 | 1 DE-North   | 1 | 1 | 4.427381 | #####   |
| 28 | 2 DE | 2020-15 | 1 DE-North   | 1 | 2 | 6.188527 | #####   |
| 29 | 2 DE | 2020-15 | 1 DE-North   | 1 | 3 | 4.83302  | #####   |
| 30 | 2 DE | 2020-15 | 1 DE-North   | 1 | 4 | 4.862208 | #####   |
| 31 | 2 DE | 2020-15 | 1 DE-North   | 1 | 5 | 2.454723 | #####   |
| 32 | 2 DE | 2020-15 | 1 DE-North   | 2 | 1 | 4.005354 | #####   |
| 33 | 2 DE | 2020-15 | 1 DE-North   | 2 | 2 | 5.329545 | #####   |
| 34 | 2 DE | 2020-15 | 1 DE-North   | 2 | 3 | 4.39726  | #####   |
| 35 | 2 DE | 2020-15 | 1 DE-North   | 2 | 4 | 5.35     | #####   |
| 36 | 2 DE | 2020-15 | 1 DE-North   | 2 | 5 | 2.132075 | #####   |
| 37 | 2 DE | 2020-15 | 1 DE-North   | 3 | 1 | 4.929498 | #####   |
| 38 | 2 DE | 2020-15 | 1 DE-North   | 3 | 2 | 7        | 1.25952 |
| 39 | 2 DE | 2020-15 | 1 DE-North   | 3 | 3 | 5.259259 | #####   |
| 40 | 2 DE | 2020-15 | 1 DE-North   | 3 | 4 | 4.406977 | #####   |
| 41 | 2 DE | 2020-15 | 1 DE-North   | 3 | 5 | 3.214286 | #####   |
| 42 | 2 DE | 2020-15 | 1 DE-Overall | 1 | 1 | 4.313974 | #####   |
| 43 | 2 DE | 2020-15 | 1 DE-Overall | 1 | 2 | 4.924558 | #####   |
| 44 | 2 DE | 2020-15 | 1 DE-Overall | 1 | 3 | 4.889623 | #####   |
| 45 | 2 DE | 2020-15 | 1 DE-Overall | 1 | 4 | 4.76744  | #####   |
| 46 | 2 DE | 2020-15 | 1 DE-Overall | 1 | 5 | 2.5362   | #####   |
| 47 | 2 DE | 2020-15 | 1 DE-Overall | 2 | 1 | 4.229299 | #####   |
| 48 | 2 DE | 2020-15 | 1 DE-Overall | 2 | 2 | 4.932978 | #####   |
| 49 | 2 DE | 2020-15 | 1 DE-Overall | 2 | 3 | 5.062429 | #####   |
| 50 | 2 DE | 2020-15 | 1 DE-Overall | 2 | 4 | 4.652219 | #####   |
| 51 | 2 DE | 2020-15 | 1 DE-Overall | 2 | 5 | 2.349506 | #####   |
| 52 | 2 DE | 2020-15 | 1 DE-Overall | 3 | 1 | 4.419446 | #####   |
| 53 | 2 DE | 2020-15 | 1 DE-Overall | 3 | 2 | 4.916216 | #####   |
| 54 | 2 DE | 2020-15 | 1 DE-Overall | 3 | 3 | 4.679246 | #####   |
| 55 | 2 DE | 2020-15 | 1 DE-Overall | 3 | 4 | 4.90066  | #####   |
| 56 | 2 DE | 2020-15 | 1 DE-Overall | 3 | 5 | 2.843057 | #####   |
| 57 | 2 DE | 2020-15 | 1 DE-South   | 1 | 1 | 4.50386  | #####   |
| 58 | 2 DE | 2020-15 | 1 DE-South   | 1 | 2 | 5.189076 | #####   |
| 59 | 2 DE | 2020-15 | 1 DE-South   | 1 |   |          |         |
| 60 | 2 DE | 2020-15 | 1 DE-South   | 1 |   |          |         |

|    |      |         |            |   |   |          |       |  |
|----|------|---------|------------|---|---|----------|-------|--|
| 1  |      |         |            |   |   |          |       |  |
| 2  |      |         |            |   |   |          |       |  |
| 3  | 2 DE | 2020-15 | 1 DE-South | 1 | 3 | 4.928038 | ##### |  |
| 4  | 2 DE | 2020-15 | 1 DE-South | 1 | 4 | 5.070085 | ##### |  |
| 5  | 2 DE | 2020-15 | 1 DE-South | 1 | 5 | 2.368542 | ##### |  |
| 6  | 2 DE | 2020-15 | 1 DE-South | 2 | 1 | 4.092438 | ##### |  |
| 7  | 2 DE | 2020-15 | 1 DE-South | 2 | 2 | 4.747826 | ##### |  |
| 8  | 2 DE | 2020-15 | 1 DE-South | 2 | 3 | 4.994764 | ##### |  |
| 9  | 2 DE | 2020-15 | 1 DE-South | 2 | 4 | 4.162162 | ##### |  |
| 10 | 2 DE | 2020-15 | 1 DE-South | 2 | 5 | 2.085714 | ##### |  |
| 11 | 2 DE | 2020-15 | 1 DE-South | 3 | 1 | 5.018403 | ##### |  |
| 12 | 2 DE | 2020-15 | 1 DE-South | 3 | 2 | 5.627907 | ##### |  |
| 13 | 2 DE | 2020-15 | 1 DE-South | 3 | 3 | 4.845361 | ##### |  |
| 14 | 2 DE | 2020-15 | 1 DE-South | 3 | 4 | 6.092593 | ##### |  |
| 15 | 2 DE | 2020-15 | 1 DE-South | 3 | 5 | 2.88     | ##### |  |
| 16 | 2 DE | 2020-15 | 1 DE-West  | 1 | 1 | 4.141855 | ##### |  |
| 17 | 2 DE | 2020-15 | 1 DE-West  | 1 | 2 | 3.950855 | ##### |  |
| 18 | 2 DE | 2020-15 | 1 DE-West  | 1 | 3 | 4.798332 | ##### |  |
| 19 | 2 DE | 2020-15 | 1 DE-West  | 1 | 4 | 4.587637 | ##### |  |
| 20 | 2 DE | 2020-15 | 1 DE-West  | 1 | 5 | 2.698196 | ##### |  |
| 21 | 2 DE | 2020-15 | 1 DE-West  | 2 | 1 | 4.485353 | ##### |  |
| 22 | 2 DE | 2020-15 | 1 DE-West  | 2 | 2 | 4.571429 | ##### |  |
| 23 | 2 DE | 2020-15 | 1 DE-West  | 2 | 3 | 5.300469 | ##### |  |
| 24 | 2 DE | 2020-15 | 1 DE-West  | 2 | 4 | 4.884615 | ##### |  |
| 25 | 2 DE | 2020-15 | 1 DE-West  | 2 | 5 | 2.627907 | ##### |  |
| 26 | 2 DE | 2020-15 | 1 DE-West  | 3 | 1 | 3.698237 | ##### |  |
| 27 | 2 DE | 2020-15 | 1 DE-West  | 3 | 2 | 3.321429 | ##### |  |
| 28 | 2 DE | 2020-15 | 1 DE-West  | 3 | 3 | 4.117647 | ##### |  |
| 29 | 2 DE | 2020-15 | 1 DE-West  | 3 | 4 | 4.175439 | ##### |  |
| 30 | 2 DE | 2020-15 | 1 DE-West  | 3 | 5 | 2.789474 | ##### |  |
| 31 | 2 DE | 2020-15 | 2 DE-East  | 1 | 1 | 1.440219 | ##### |  |
| 32 | 2 DE | 2020-15 | 2 DE-East  | 1 | 2 | 1.719264 | ##### |  |
| 33 | 2 DE | 2020-15 | 2 DE-East  | 1 | 3 | 1.715789 | ##### |  |
| 34 | 2 DE | 2020-15 | 2 DE-East  | 1 | 4 | 1.404689 | ##### |  |
| 35 | 2 DE | 2020-15 | 2 DE-East  | 1 | 5 | 1.050057 | ##### |  |
| 36 | 2 DE | 2020-15 | 2 DE-East  | 2 | 1 | 1.47219  | ##### |  |
| 37 | 2 DE | 2020-15 | 2 DE-East  | 2 | 2 | 1.753086 | ##### |  |
| 38 | 2 DE | 2020-15 | 2 DE-East  | 2 | 3 | 1.913295 | ##### |  |
| 39 | 2 DE | 2020-15 | 2 DE-East  | 2 | 4 | 1.4      | ##### |  |
| 40 | 2 DE | 2020-15 | 2 DE-East  | 2 | 5 | #####    | ##### |  |
| 41 | 2 DE | 2020-15 | 2 DE-East  | 3 | 1 | 1.401241 | ##### |  |
| 42 | 2 DE | 2020-15 | 2 DE-East  | 3 | 2 | 1.6875   | ##### |  |
| 43 | 2 DE | 2020-15 | 2 DE-East  | 3 | 3 | 1.464286 | ##### |  |
| 44 | 2 DE | 2020-15 | 2 DE-East  | 3 | 4 | 1.409639 | ##### |  |
| 45 | 2 DE | 2020-15 | 2 DE-East  | 3 | 5 | 1.155556 | ##### |  |
| 46 | 2 DE | 2020-15 | 2 DE-North | 1 | 1 | 1.554161 | ##### |  |
| 47 | 2 DE | 2020-15 | 2 DE-North | 1 | 2 | 1.949538 | ##### |  |
| 48 | 2 DE | 2020-15 | 2 DE-North | 1 | 3 | 1.569909 | ##### |  |
| 49 | 2 DE | 2020-15 | 2 DE-North | 1 | 4 | 1.593939 | ##### |  |
| 50 | 2 DE | 2020-15 | 2 DE-North | 1 | 5 | 1.246042 | ##### |  |
| 51 | 2 DE | 2020-15 | 2 DE-North | 2 | 1 | 1.511579 | ##### |  |
| 52 | 2 DE | 2020-15 | 2 DE-North | 2 | 2 | 1.962617 | ##### |  |
| 53 | 2 DE | 2020-15 | 2 DE-North | 2 | 3 | 1.7      | ##### |  |
| 54 | 2 DE | 2020-15 | 2 DE-North | 2 | 4 | 1.486486 | ##### |  |
| 55 | 2 DE | 2020-15 | 2 DE-North | 2 | 5 | 1.145455 | ##### |  |
| 56 | 2 DE | 2020-15 | 2 DE-North | 3 | 1 | 1.604074 | ##### |  |
| 57 | 2 DE | 2020-15 | 2 DE-North | 3 | 2 | 1.935484 | ##### |  |
| 58 | 2 DE | 2020-15 | 2 DE-North | 3 | 3 | 1.44086  | ##### |  |
| 59 | 2 DE | 2020-15 | 2 DE-North | 3 | 3 | 1.44086  | ##### |  |
| 60 | 2 DE | 2020-15 | 2 DE-North | 3 | 3 | 1.44086  | ##### |  |

|    |      |         |              |   |   |          |       |  |
|----|------|---------|--------------|---|---|----------|-------|--|
| 1  |      |         |              |   |   |          |       |  |
| 2  |      |         |              |   |   |          |       |  |
| 3  | 2 DE | 2020-15 | 2 DE-North   | 3 | 4 | 1.695238 | ##### |  |
| 4  | 2 DE | 2020-15 | 2 DE-North   | 3 | 5 | 1.454545 | ##### |  |
| 5  | 2 DE | 2020-15 | 2 DE-Overall | 1 | 1 | 1.528352 | ##### |  |
| 6  | 2 DE | 2020-15 | 2 DE-Overall | 1 | 2 | 1.866661 | ##### |  |
| 7  | 2 DE | 2020-15 | 2 DE-Overall | 1 | 3 | 1.694142 | ##### |  |
| 8  | 2 DE | 2020-15 | 2 DE-Overall | 1 | 4 | 1.476821 | ##### |  |
| 9  | 2 DE | 2020-15 | 2 DE-Overall | 1 | 5 | 1.107165 | ##### |  |
| 10 | 2 DE | 2020-15 | 2 DE-Overall | 2 | 1 | 1.546254 | ##### |  |
| 11 | 2 DE | 2020-15 | 2 DE-Overall | 2 | 2 | 1.852924 | ##### |  |
| 12 | 2 DE | 2020-15 | 2 DE-Overall | 2 | 3 | 1.83239  | ##### |  |
| 13 | 2 DE | 2020-15 | 2 DE-Overall | 2 | 4 | 1.478705 | ##### |  |
| 14 | 2 DE | 2020-15 | 2 DE-Overall | 2 | 5 | 1.046623 | ##### |  |
| 15 | 2 DE | 2020-15 | 2 DE-Overall | 3 | 1 | 1.506106 | ##### |  |
| 16 | 2 DE | 2020-15 | 2 DE-Overall | 3 | 2 | 1.881188 | ##### |  |
| 17 | 2 DE | 2020-15 | 2 DE-Overall | 3 | 3 | 1.524773 | ##### |  |
| 18 | 2 DE | 2020-15 | 2 DE-Overall | 3 | 4 | 1.474664 | ##### |  |
| 19 | 2 DE | 2020-15 | 2 DE-Overall | 3 | 5 | 1.202727 | ##### |  |
| 20 | 2 DE | 2020-15 | 2 DE-South   | 1 | 1 | 1.565103 | ##### |  |
| 21 | 2 DE | 2020-15 | 2 DE-South   | 1 | 2 | 1.939246 | ##### |  |
| 22 | 2 DE | 2020-15 | 2 DE-South   | 1 | 3 | 1.676289 | ##### |  |
| 23 | 2 DE | 2020-15 | 2 DE-South   | 1 | 4 | 1.59406  | ##### |  |
| 24 | 2 DE | 2020-15 | 2 DE-South   | 1 | 5 | #####    | ##### |  |
| 25 | 2 DE | 2020-15 | 2 DE-South   | 2 | 1 | 1.525278 | ##### |  |
| 26 | 2 DE | 2020-15 | 2 DE-South   | 2 | 2 | 1.862595 | ##### |  |
| 27 | 2 DE | 2020-15 | 2 DE-South   | 2 | 3 | 1.699074 | ##### |  |
| 28 | 2 DE | 2020-15 | 2 DE-South   | 2 | 4 | 1.625    | ##### |  |
| 29 | 2 DE | 2020-15 | 2 DE-South   | 2 | 5 | #####    | ##### |  |
| 30 | 2 DE | 2020-15 | 2 DE-South   | 3 | 1 | 1.614637 | ##### |  |
| 31 | 2 DE | 2020-15 | 2 DE-South   | 3 | 2 | 2.022222 | ##### |  |
| 32 | 2 DE | 2020-15 | 2 DE-South   | 3 | 3 | 1.649123 | ##### |  |
| 33 | 2 DE | 2020-15 | 2 DE-South   | 3 | 4 | 1.557377 | ##### |  |
| 34 | 2 DE | 2020-15 | 2 DE-South   | 3 | 5 | 1.142857 | ##### |  |
| 35 | 2 DE | 2020-15 | 2 DE-South   | 3 | 5 | 1.142857 | ##### |  |
| 36 | 2 DE | 2020-15 | 2 DE-West    | 1 | 1 | 1.532093 | ##### |  |
| 37 | 2 DE | 2020-15 | 2 DE-West    | 1 | 2 | 1.814738 | ##### |  |
| 38 | 2 DE | 2020-15 | 2 DE-West    | 1 | 3 | 1.764424 | ##### |  |
| 39 | 2 DE | 2020-15 | 2 DE-West    | 1 | 4 | 1.355853 | ##### |  |
| 40 | 2 DE | 2020-15 | 2 DE-West    | 1 | 5 | 1.171992 | ##### |  |
| 41 | 2 DE | 2020-15 | 2 DE-West    | 2 | 1 | 1.623681 | ##### |  |
| 42 | 2 DE | 2020-15 | 2 DE-West    | 2 | 2 | 1.82243  | ##### |  |
| 43 | 2 DE | 2020-15 | 2 DE-West    | 2 | 3 | 1.967611 | ##### |  |
| 44 | 2 DE | 2020-15 | 2 DE-West    | 2 | 4 | 1.410256 | ##### |  |
| 45 | 2 DE | 2020-15 | 2 DE-West    | 2 | 5 | 1.191489 | ##### |  |
| 46 | 2 DE | 2020-15 | 2 DE-West    | 3 | 1 | 1.413106 | ##### |  |
| 47 | 2 DE | 2020-15 | 2 DE-West    | 3 | 2 | 1.806452 | ##### |  |
| 48 | 2 DE | 2020-15 | 2 DE-West    | 3 | 3 | 1.484536 | ##### |  |
| 49 | 2 DE | 2020-15 | 2 DE-West    | 3 | 4 | 1.283582 | ##### |  |
| 50 | 2 DE | 2020-15 | 2 DE-West    | 3 | 5 | 1.146341 | ##### |  |
| 51 | 2 DE | 2020-15 | 3 DE-East    | 1 | 1 | 0        | 0     |  |
| 52 | 2 DE | 2020-15 | 3 DE-East    | 1 | 2 | 0        | 0     |  |
| 53 | 2 DE | 2020-15 | 3 DE-East    | 1 | 3 | 0        | 0     |  |
| 54 | 2 DE | 2020-15 | 3 DE-East    | 1 | 4 | 0        | 0     |  |
| 55 | 2 DE | 2020-15 | 3 DE-East    | 1 | 5 | 0        | 0     |  |
| 56 | 2 DE | 2020-15 | 3 DE-East    | 2 | 1 | 0        | 0     |  |
| 57 | 2 DE | 2020-15 | 3 DE-East    | 2 | 2 | 0        | 0     |  |
| 58 | 2 DE | 2020-15 | 3 DE-East    | 2 | 3 | 0        | 0     |  |
| 59 | 2 DE | 2020-15 | 3 DE-East    | 2 | 4 | 0        | 0     |  |
| 60 | 2 DE | 2020-15 | 3 DE-East    | 2 | 5 | 0        | 0     |  |

|    |      |         |              |   |   |   |   |
|----|------|---------|--------------|---|---|---|---|
| 1  |      |         |              |   |   |   |   |
| 2  |      |         |              |   |   |   |   |
| 3  | 2 DE | 2020-15 | 3 DE-East    | 2 | 5 | 0 | 0 |
| 4  | 2 DE | 2020-15 | 3 DE-East    | 3 | 1 | 0 | 0 |
| 5  | 2 DE | 2020-15 | 3 DE-East    | 3 | 2 | 0 | 0 |
| 6  | 2 DE | 2020-15 | 3 DE-East    | 3 | 3 | 0 | 0 |
| 7  | 2 DE | 2020-15 | 3 DE-East    | 3 | 4 | 0 | 0 |
| 8  | 2 DE | 2020-15 | 3 DE-East    | 3 | 5 | 0 | 0 |
| 9  | 2 DE | 2020-15 | 3 DE-North   | 1 | 1 | 0 | 0 |
| 10 | 2 DE | 2020-15 | 3 DE-North   | 1 | 2 | 0 | 0 |
| 11 | 2 DE | 2020-15 | 3 DE-North   | 1 | 3 | 0 | 0 |
| 12 | 2 DE | 2020-15 | 3 DE-North   | 1 | 4 | 0 | 0 |
| 13 | 2 DE | 2020-15 | 3 DE-North   | 1 | 5 | 0 | 0 |
| 14 | 2 DE | 2020-15 | 3 DE-North   | 2 | 1 | 0 | 0 |
| 15 | 2 DE | 2020-15 | 3 DE-North   | 2 | 2 | 0 | 0 |
| 16 | 2 DE | 2020-15 | 3 DE-North   | 2 | 3 | 0 | 0 |
| 17 | 2 DE | 2020-15 | 3 DE-North   | 2 | 4 | 0 | 0 |
| 18 | 2 DE | 2020-15 | 3 DE-North   | 2 | 5 | 0 | 0 |
| 19 | 2 DE | 2020-15 | 3 DE-North   | 3 | 1 | 0 | 0 |
| 20 | 2 DE | 2020-15 | 3 DE-North   | 3 | 2 | 0 | 0 |
| 21 | 2 DE | 2020-15 | 3 DE-North   | 3 | 3 | 0 | 0 |
| 22 | 2 DE | 2020-15 | 3 DE-North   | 3 | 4 | 0 | 0 |
| 23 | 2 DE | 2020-15 | 3 DE-North   | 3 | 5 | 0 | 0 |
| 24 | 2 DE | 2020-15 | 3 DE-North   | 3 | 5 | 0 | 0 |
| 25 | 2 DE | 2020-15 | 3 DE-Overall | 1 | 1 | 0 | 0 |
| 26 | 2 DE | 2020-15 | 3 DE-Overall | 1 | 2 | 0 | 0 |
| 27 | 2 DE | 2020-15 | 3 DE-Overall | 1 | 3 | 0 | 0 |
| 28 | 2 DE | 2020-15 | 3 DE-Overall | 1 | 4 | 0 | 0 |
| 29 | 2 DE | 2020-15 | 3 DE-Overall | 1 | 5 | 0 | 0 |
| 30 | 2 DE | 2020-15 | 3 DE-Overall | 2 | 1 | 0 | 0 |
| 31 | 2 DE | 2020-15 | 3 DE-Overall | 2 | 2 | 0 | 0 |
| 32 | 2 DE | 2020-15 | 3 DE-Overall | 2 | 3 | 0 | 0 |
| 33 | 2 DE | 2020-15 | 3 DE-Overall | 2 | 4 | 0 | 0 |
| 34 | 2 DE | 2020-15 | 3 DE-Overall | 2 | 5 | 0 | 0 |
| 35 | 2 DE | 2020-15 | 3 DE-Overall | 3 | 1 | 0 | 0 |
| 36 | 2 DE | 2020-15 | 3 DE-Overall | 3 | 2 | 0 | 0 |
| 37 | 2 DE | 2020-15 | 3 DE-Overall | 3 | 3 | 0 | 0 |
| 38 | 2 DE | 2020-15 | 3 DE-Overall | 3 | 4 | 0 | 0 |
| 39 | 2 DE | 2020-15 | 3 DE-Overall | 3 | 5 | 0 | 0 |
| 40 | 2 DE | 2020-15 | 3 DE-South   | 1 | 1 | 0 | 0 |
| 41 | 2 DE | 2020-15 | 3 DE-South   | 1 | 2 | 0 | 0 |
| 42 | 2 DE | 2020-15 | 3 DE-South   | 1 | 3 | 0 | 0 |
| 43 | 2 DE | 2020-15 | 3 DE-South   | 1 | 4 | 0 | 0 |
| 44 | 2 DE | 2020-15 | 3 DE-South   | 1 | 5 | 0 | 0 |
| 45 | 2 DE | 2020-15 | 3 DE-South   | 2 | 1 | 0 | 0 |
| 46 | 2 DE | 2020-15 | 3 DE-South   | 2 | 2 | 0 | 0 |
| 47 | 2 DE | 2020-15 | 3 DE-South   | 2 | 3 | 0 | 0 |
| 48 | 2 DE | 2020-15 | 3 DE-South   | 2 | 4 | 0 | 0 |
| 49 | 2 DE | 2020-15 | 3 DE-South   | 2 | 5 | 0 | 0 |
| 50 | 2 DE | 2020-15 | 3 DE-South   | 3 | 1 | 0 | 0 |
| 51 | 2 DE | 2020-15 | 3 DE-South   | 3 | 2 | 0 | 0 |
| 52 | 2 DE | 2020-15 | 3 DE-South   | 3 | 3 | 0 | 0 |
| 53 | 2 DE | 2020-15 | 3 DE-South   | 3 | 4 | 0 | 0 |
| 54 | 2 DE | 2020-15 | 3 DE-South   | 3 | 5 | 0 | 0 |
| 55 | 2 DE | 2020-15 | 3 DE-West    | 1 | 1 | 0 | 0 |
| 56 | 2 DE | 2020-15 | 3 DE-West    | 1 | 2 | 0 | 0 |
| 57 | 2 DE | 2020-15 | 3 DE-West    | 1 | 3 | 0 | 0 |
| 58 | 2 DE | 2020-15 | 3 DE-West    | 1 | 4 | 0 | 0 |
| 59 | 2 DE | 2020-15 | 3 DE-West    | 1 | 5 | 0 | 0 |
| 60 | 2 DE | 2020-15 | 3 DE-West    | 1 | 5 | 0 | 0 |



|    |      |         |              |   |   |          |         |  |
|----|------|---------|--------------|---|---|----------|---------|--|
| 1  |      |         |              |   |   |          |         |  |
| 2  |      |         |              |   |   |          |         |  |
| 3  | 2 DE | 2020-15 | 3 DE-West    | 2 | 1 | 0        | 0       |  |
| 4  | 2 DE | 2020-15 | 3 DE-West    | 2 | 2 | 0        | 0       |  |
| 5  | 2 DE | 2020-15 | 3 DE-West    | 2 | 3 | 0        | 0       |  |
| 6  | 2 DE | 2020-15 | 3 DE-West    | 2 | 4 | 0        | 0       |  |
| 7  | 2 DE | 2020-15 | 3 DE-West    | 2 | 5 | 0        | 0       |  |
| 8  | 2 DE | 2020-15 | 3 DE-West    | 3 | 1 | 0        | 0       |  |
| 9  | 2 DE | 2020-15 | 3 DE-West    | 3 | 2 | 0        | 0       |  |
| 10 | 2 DE | 2020-15 | 3 DE-West    | 3 | 3 | 0        | 0       |  |
| 11 | 2 DE | 2020-15 | 3 DE-West    | 3 | 4 | 0        | 0       |  |
| 12 | 2 DE | 2020-15 | 3 DE-West    | 3 | 5 | 0        | 0       |  |
| 13 | 2 DE | 2020-15 | 4 DE-East    | 1 | 1 | 1.841756 | #####   |  |
| 14 | 2 DE | 2020-15 | 4 DE-East    | 1 | 2 | 2.877783 | #####   |  |
| 15 | 2 DE | 2020-15 | 4 DE-East    | 1 | 3 | 2.218706 | #####   |  |
| 16 | 2 DE | 2020-15 | 4 DE-East    | 1 | 4 | 2.350821 | #####   |  |
| 17 | 2 DE | 2020-15 | 4 DE-East    | 1 | 5 | #####    | #####   |  |
| 18 | 2 DE | 2020-15 | 4 DE-East    | 2 | 1 | 1.683761 | #####   |  |
| 19 | 2 DE | 2020-15 | 4 DE-East    | 2 | 2 | 3.234568 | #####   |  |
| 20 | 2 DE | 2020-15 | 4 DE-East    | 2 | 3 | 2.161111 | #####   |  |
| 21 | 2 DE | 2020-15 | 4 DE-East    | 2 | 4 | 1.726415 | #####   |  |
| 22 | 2 DE | 2020-15 | 4 DE-East    | 2 | 5 | #####    | #####   |  |
| 23 | 2 DE | 2020-15 | 4 DE-East    | 3 | 1 | 2.034124 | #####   |  |
| 24 | 2 DE | 2020-15 | 4 DE-East    | 3 | 2 | 2.571429 | #####   |  |
| 25 | 2 DE | 2020-15 | 4 DE-East    | 3 | 3 | 2.294118 | #####   |  |
| 26 | 2 DE | 2020-15 | 4 DE-East    | 3 | 4 | 3.02439  | #####   |  |
| 27 | 2 DE | 2020-15 | 4 DE-East    | 3 | 5 | #####    | #####   |  |
| 28 | 2 DE | 2020-15 | 4 DE-North   | 1 | 1 | 1.724141 | #####   |  |
| 29 | 2 DE | 2020-15 | 4 DE-North   | 1 | 2 | 2.531224 | #####   |  |
| 30 | 2 DE | 2020-15 | 4 DE-North   | 1 | 3 | 2.216798 | #####   |  |
| 31 | 2 DE | 2020-15 | 4 DE-North   | 1 | 4 | 2.108597 | #####   |  |
| 32 | 2 DE | 2020-15 | 4 DE-North   | 1 | 5 | #####    | #####   |  |
| 33 | 2 DE | 2020-15 | 4 DE-North   | 2 | 1 | 1.360185 | #####   |  |
| 34 | 2 DE | 2020-15 | 4 DE-North   | 2 | 2 | 2.058824 | #####   |  |
| 35 | 2 DE | 2020-15 | 4 DE-North   | 2 | 3 | 1.491429 | #####   |  |
| 36 | 2 DE | 2020-15 | 4 DE-North   | 2 | 4 | 2.277778 | #####   |  |
| 37 | 2 DE | 2020-15 | 4 DE-North   | 2 | 5 | #####    | #####   |  |
| 38 | 2 DE | 2020-15 | 4 DE-North   | 3 | 1 | 2.132453 | #####   |  |
| 39 | 2 DE | 2020-15 | 4 DE-North   | 3 | 2 | 3        | 1.02799 |  |
| 40 | 2 DE | 2020-15 | 4 DE-North   | 3 | 3 | 2.892157 | #####   |  |
| 41 | 2 DE | 2020-15 | 4 DE-North   | 3 | 4 | 1.951923 | #####   |  |
| 42 | 2 DE | 2020-15 | 4 DE-North   | 3 | 5 | #####    | #####   |  |
| 43 | 2 DE | 2020-15 | 4 DE-Overall | 1 | 1 | 1.829759 | #####   |  |
| 44 | 2 DE | 2020-15 | 4 DE-Overall | 1 | 2 | 2.020109 | #####   |  |
| 45 | 2 DE | 2020-15 | 4 DE-Overall | 1 | 3 | 2.354112 | #####   |  |
| 46 | 2 DE | 2020-15 | 4 DE-Overall | 1 | 4 | 2.404416 | #####   |  |
| 47 | 2 DE | 2020-15 | 4 DE-Overall | 1 | 5 | #####    | #####   |  |
| 48 | 2 DE | 2020-15 | 4 DE-Overall | 2 | 1 | 1.653543 | #####   |  |
| 49 | 2 DE | 2020-15 | 4 DE-Overall | 2 | 2 | 1.947993 | #####   |  |
| 50 | 2 DE | 2020-15 | 4 DE-Overall | 2 | 3 | 2.256205 | #####   |  |
| 51 | 2 DE | 2020-15 | 4 DE-Overall | 2 | 4 | 2.071749 | #####   |  |
| 52 | 2 DE | 2020-15 | 4 DE-Overall | 2 | 5 | #####    | #####   |  |
| 53 | 2 DE | 2020-15 | 4 DE-Overall | 3 | 1 | 2.040929 | #####   |  |
| 54 | 2 DE | 2020-15 | 4 DE-Overall | 3 | 2 | 2.088992 | #####   |  |
| 55 | 2 DE | 2020-15 | 4 DE-Overall | 3 | 3 | 2.472032 | #####   |  |
| 56 | 2 DE | 2020-15 | 4 DE-Overall | 3 | 4 | 2.77251  | #####   |  |
| 57 | 2 DE | 2020-15 | 4 DE-Overall | 3 | 5 | #####    | #####   |  |
| 58 | 2 DE | 2020-15 | 4 DE-South   | 1 | 1 | 2.031553 | #####   |  |
| 59 |      |         |              |   |   |          |         |  |
| 60 |      |         |              |   |   |          |         |  |

|    |      |         |            |   |   |          |       |  |
|----|------|---------|------------|---|---|----------|-------|--|
| 1  |      |         |            |   |   |          |       |  |
| 2  |      |         |            |   |   |          |       |  |
| 3  | 2 DE | 2020-15 | 4 DE-South | 1 | 2 | 2.027562 | ##### |  |
| 4  | 2 DE | 2020-15 | 4 DE-South | 1 | 3 | 2.575653 | ##### |  |
| 5  | 2 DE | 2020-15 | 4 DE-South | 1 | 4 | 2.674582 | ##### |  |
| 6  | 2 DE | 2020-15 | 4 DE-South | 1 | 5 | #####    | ##### |  |
| 7  | 2 DE | 2020-15 | 4 DE-South | 2 | 1 | 1.617487 | ##### |  |
| 8  | 2 DE | 2020-15 | 4 DE-South | 2 | 2 | 1.810606 | ##### |  |
| 9  | 2 DE | 2020-15 | 4 DE-South | 2 | 3 | 2.340909 | ##### |  |
| 10 | 2 DE | 2020-15 | 4 DE-South | 2 | 4 | 1.813953 | ##### |  |
| 11 | 2 DE | 2020-15 | 4 DE-South | 2 | 5 | 0        | 0     |  |
| 12 | 2 DE | 2020-15 | 4 DE-South | 3 | 1 | 2.527895 | ##### |  |
| 13 | 2 DE | 2020-15 | 4 DE-South | 3 | 2 | 2.244898 | ##### |  |
| 14 | 2 DE | 2020-15 | 4 DE-South | 3 | 3 | 2.848739 | ##### |  |
| 15 | 2 DE | 2020-15 | 4 DE-South | 3 | 4 | 3.625    | ##### |  |
| 16 | 2 DE | 2020-15 | 4 DE-South | 3 | 5 | #####    | ##### |  |
| 17 | 2 DE | 2020-15 | 4 DE-West  | 1 | 1 | 1.716995 | ##### |  |
| 18 | 2 DE | 2020-15 | 4 DE-West  | 1 | 2 | 1.396237 | ##### |  |
| 19 | 2 DE | 2020-15 | 4 DE-West  | 1 | 3 | 2.292209 | ##### |  |
| 20 | 2 DE | 2020-15 | 4 DE-West  | 1 | 4 | 2.410435 | ##### |  |
| 21 | 2 DE | 2020-15 | 4 DE-West  | 1 | 5 | #####    | ##### |  |
| 22 | 2 DE | 2020-15 | 4 DE-West  | 2 | 1 | 1.826695 | ##### |  |
| 23 | 2 DE | 2020-15 | 4 DE-West  | 2 | 2 | 1.514286 | ##### |  |
| 24 | 2 DE | 2020-15 | 4 DE-West  | 2 | 3 | 2.570313 | ##### |  |
| 25 | 2 DE | 2020-15 | 4 DE-West  | 2 | 4 | 2.333333 | ##### |  |
| 26 | 2 DE | 2020-15 | 4 DE-West  | 2 | 5 | #####    | ##### |  |
| 27 | 2 DE | 2020-15 | 4 DE-West  | 3 | 1 | 1.581693 | ##### |  |
| 28 | 2 DE | 2020-15 | 4 DE-West  | 3 | 2 | 1.285714 | ##### |  |
| 29 | 2 DE | 2020-15 | 4 DE-West  | 3 | 3 | 1.910891 | ##### |  |
| 30 | 2 DE | 2020-15 | 4 DE-West  | 3 | 4 | 2.506849 | ##### |  |
| 31 | 2 DE | 2020-15 | 4 DE-West  | 3 | 5 | #####    | ##### |  |
| 32 | 2 DE | 2020-15 | 5 DE-East  | 1 | 1 | 1.260462 | ##### |  |
| 33 | 2 DE | 2020-15 | 5 DE-East  | 1 | 2 | 1.431617 | ##### |  |
| 34 | 2 DE | 2020-15 | 5 DE-East  | 1 | 3 | 1.389981 | ##### |  |
| 35 | 2 DE | 2020-15 | 5 DE-East  | 1 | 4 | 1.151264 | ##### |  |
| 36 | 2 DE | 2020-15 | 5 DE-East  | 1 | 5 | 1.147389 | ##### |  |
| 37 | 2 DE | 2020-15 | 5 DE-East  | 2 | 1 | 1.190968 | ##### |  |
| 38 | 2 DE | 2020-15 | 5 DE-East  | 2 | 2 | 1.3625   | ##### |  |
| 39 | 2 DE | 2020-15 | 5 DE-East  | 2 | 3 | 1.444444 | ##### |  |
| 40 | 2 DE | 2020-15 | 5 DE-East  | 2 | 4 | 1.070707 | ##### |  |
| 41 | 2 DE | 2020-15 | 5 DE-East  | 2 | 5 | #####    | ##### |  |
| 42 | 2 DE | 2020-15 | 5 DE-East  | 3 | 1 | 1.346696 | ##### |  |
| 43 | 2 DE | 2020-15 | 5 DE-East  | 3 | 2 | 1.5      | ##### |  |
| 44 | 2 DE | 2020-15 | 5 DE-East  | 3 | 3 | 1.321429 | ##### |  |
| 45 | 2 DE | 2020-15 | 5 DE-East  | 3 | 4 | 1.24     | ##### |  |
| 46 | 2 DE | 2020-15 | 5 DE-East  | 3 | 5 | 1.439024 | ##### |  |
| 47 | 2 DE | 2020-15 | 5 DE-North | 1 | 1 | 1.360764 | ##### |  |
| 48 | 2 DE | 2020-15 | 5 DE-North | 1 | 2 | 1.549249 | ##### |  |
| 49 | 2 DE | 2020-15 | 5 DE-North | 1 | 3 | 1.387604 | ##### |  |
| 50 | 2 DE | 2020-15 | 5 DE-North | 1 | 4 | 1.420001 | ##### |  |
| 51 | 2 DE | 2020-15 | 5 DE-North | 1 | 5 | 1.145003 | ##### |  |
| 52 | 2 DE | 2020-15 | 5 DE-North | 2 | 1 | 1.169148 | ##### |  |
| 53 | 2 DE | 2020-15 | 5 DE-North | 2 | 2 | 1.272727 | ##### |  |
| 54 | 2 DE | 2020-15 | 5 DE-North | 2 | 3 | 1.197674 | ##### |  |
| 55 | 2 DE | 2020-15 | 5 DE-North | 2 | 4 | 1.352941 | ##### |  |
| 56 | 2 DE | 2020-15 | 5 DE-North | 2 | 5 | #####    | ##### |  |
| 57 | 2 DE | 2020-15 | 5 DE-North | 3 | 1 | 1.592738 | ##### |  |
| 58 | 2 DE | 2020-15 | 5 DE-North | 3 | 2 | 1.833333 | ##### |  |
| 59 | 2 DE | 2020-15 | 5 DE-North | 3 |   |          |       |  |
| 60 | 2 DE | 2020-15 | 5 DE-North | 3 |   |          |       |  |

|    |      |         |              |   |   |          |          |  |
|----|------|---------|--------------|---|---|----------|----------|--|
| 1  |      |         |              |   |   |          |          |  |
| 2  |      |         |              |   |   |          |          |  |
| 3  | 2 DE | 2020-15 | 5 DE-North   | 3 | 3 | 1.582418 | #####    |  |
| 4  | 2 DE | 2020-15 | 5 DE-North   | 3 | 4 | 1.484211 | #####    |  |
| 5  | 2 DE | 2020-15 | 5 DE-North   | 3 | 5 | 1.6      | #####    |  |
| 6  | 2 DE | 2020-15 | 5 DE-Overall | 1 | 1 | 1.274021 | #####    |  |
| 7  | 2 DE | 2020-15 | 5 DE-Overall | 1 | 2 | 1.315397 | #####    |  |
| 8  | 2 DE | 2020-15 | 5 DE-Overall | 1 | 3 | 1.229303 | #####    |  |
| 9  | 2 DE | 2020-15 | 5 DE-Overall | 1 | 4 | 1.300479 | #####    |  |
| 10 | 2 DE | 2020-15 | 5 DE-Overall | 1 | 5 | 1.283025 | #####    |  |
| 11 | 2 DE | 2020-15 | 5 DE-Overall | 2 | 1 | 1.20324  | #####    |  |
| 12 | 2 DE | 2020-15 | 5 DE-Overall | 2 | 2 | 1.216088 | #####    |  |
| 13 | 2 DE | 2020-15 | 5 DE-Overall | 2 | 3 | 1.182283 | #####    |  |
| 14 | 2 DE | 2020-15 | 5 DE-Overall | 2 | 4 | 1.282569 | #####    |  |
| 15 | 2 DE | 2020-15 | 5 DE-Overall | 2 | 5 | 1.142012 | #####    |  |
| 16 | 2 DE | 2020-15 | 5 DE-Overall | 3 | 1 | 1.362907 | #####    |  |
| 17 | 2 DE | 2020-15 | 5 DE-Overall | 3 | 2 | 1.414354 | #####    |  |
| 18 | 2 DE | 2020-15 | 5 DE-Overall | 3 | 3 | 1.287901 | #####    |  |
| 19 | 2 DE | 2020-15 | 5 DE-Overall | 3 | 4 | 1.321363 | #####    |  |
| 20 | 2 DE | 2020-15 | 5 DE-Overall | 3 | 5 | 1.515497 | #####    |  |
| 21 | 2 DE | 2020-15 | 5 DE-South   | 1 | 1 | 1.19765  | #####    |  |
| 22 | 2 DE | 2020-15 | 5 DE-South   | 1 | 2 | 1.15053  | #####    |  |
| 23 | 2 DE | 2020-15 | 5 DE-South   | 1 | 3 | 1.008233 | #####    |  |
| 24 | 2 DE | 2020-15 | 5 DE-South   | 1 | 4 | 1.362298 | #####    |  |
| 25 | 2 DE | 2020-15 | 5 DE-South   | 1 | 5 | 1.419003 | #####    |  |
| 26 | 2 DE | 2020-15 | 5 DE-South   | 2 | 1 | 1.156495 | #####    |  |
| 27 | 2 DE | 2020-15 | 5 DE-South   | 2 | 2 | 1.014599 | #####    |  |
| 28 | 2 DE | 2020-15 | 5 DE-South   | 2 | 3 | 1        | #####    |  |
| 29 | 2 DE | 2020-15 | 5 DE-South   | 2 | 4 | 1.3625   | #####    |  |
| 30 | 2 DE | 2020-15 | 5 DE-South   | 2 | 5 | 1.324324 | #####    |  |
| 31 | 2 DE | 2020-15 | 5 DE-South   | 3 | 1 | 1.250778 | #####    |  |
| 32 | 2 DE | 2020-15 | 5 DE-South   | 3 | 2 | 1.297872 | #####    |  |
| 33 | 2 DE | 2020-15 | 5 DE-South   | 3 | 3 | 1.018692 | #####    |  |
| 34 | 2 DE | 2020-15 | 5 DE-South   | 3 | 4 | 1.362069 | #####    |  |
| 35 | 2 DE | 2020-15 | 5 DE-South   | 3 | 5 | 1.6      | #####    |  |
| 36 | 2 DE | 2020-15 | 5 DE-South   | 3 | 5 | 1.6      | #####    |  |
| 37 | 2 DE | 2020-15 | 5 DE-West    | 1 | 1 | 1.295257 | #####    |  |
| 38 | 2 DE | 2020-15 | 5 DE-West    | 1 | 2 | 1.308395 | #####    |  |
| 39 | 2 DE | 2020-15 | 5 DE-West    | 1 | 3 | 1.265899 | #####    |  |
| 40 | 2 DE | 2020-15 | 5 DE-West    | 1 | 4 | 1.269966 | #####    |  |
| 41 | 2 DE | 2020-15 | 5 DE-West    | 1 | 5 | 1.363975 | #####    |  |
| 42 | 2 DE | 2020-15 | 5 DE-West    | 2 | 1 | 1.267831 | #####    |  |
| 43 | 2 DE | 2020-15 | 5 DE-West    | 2 | 2 | 1.333333 | #####    |  |
| 44 | 2 DE | 2020-15 | 5 DE-West    | 2 | 3 | 1.208333 | #####    |  |
| 45 | 2 DE | 2020-15 | 5 DE-West    | 2 | 4 | 1.304348 | #####    |  |
| 46 | 2 DE | 2020-15 | 5 DE-West    | 2 | 5 | 1.276596 | #####    |  |
| 47 | 2 DE | 2020-15 | 5 DE-West    | 3 | 1 | 1.329854 | #####    |  |
| 48 | 2 DE | 2020-15 | 5 DE-West    | 3 | 2 | 1.285714 | #####    |  |
| 49 | 2 DE | 2020-15 | 5 DE-West    | 3 | 3 | 1.34375  | #####    |  |
| 50 | 2 DE | 2020-15 | 5 DE-West    | 3 | 4 | 1.222222 | #####    |  |
| 51 | 2 DE | 2020-15 | 5 DE-West    | 3 | 5 | 1.47619  | #####    |  |
| 52 | 2 ES | 2020-12 | 1 ES-Center  | 1 | 1 | 3.403405 | #####    |  |
| 53 | 2 ES | 2020-12 | 1 ES-Center  | 1 | 2 | 4        | 0        |  |
| 54 | 2 ES | 2020-12 | 1 ES-Center  | 1 | 3 | 2        | 0        |  |
| 55 | 2 ES | 2020-12 | 1 ES-Center  | 1 | 4 | 1.885429 | #####    |  |
| 56 | 2 ES | 2020-12 | 1 ES-Center  | 2 | 1 | 2.516861 | #####    |  |
| 57 | 2 ES | 2020-12 | 1 ES-Center  | 2 | 3 | 2        | 0        |  |
| 58 | 2 ES | 2020-12 | 1 ES-Center  | 2 | 4 | 2.666667 | 1.186453 |  |
| 59 | 2 ES | 2020-12 | 1 ES-Center  | 3 | 1 | 3.583383 | #####    |  |
| 60 | 2 ES | 2020-12 | 1 ES-Center  | 3 | 1 | 3.583383 | #####    |  |

1  
2  
3  
4  
5  
6  
7  
8  
9  
10  
11  
12  
13  
14  
15  
16  
17  
18  
19  
20  
21  
22  
23  
24  
25  
26  
27  
28  
29  
30  
31  
32  
33  
34  
35  
36  
37  
38  
39  
40  
41  
42  
43  
44  
45  
46  
47  
48  
49  
50  
51  
52  
53  
54  
55  
56  
57  
58  
59  
60

|      |         |              |   |   |          |          |
|------|---------|--------------|---|---|----------|----------|
| 2 ES | 2020-12 | 1 ES-Center  | 3 | 2 | 4        | 0        |
| 2 ES | 2020-12 | 1 ES-Center  | 3 | 4 | 1        | 0        |
| 2 ES | 2020-12 | 1 ES-East    | 1 | 1 | 2.497732 | #####    |
| 2 ES | 2020-12 | 1 ES-East    | 1 | 2 | 2        | #####    |
| 2 ES | 2020-12 | 1 ES-East    | 1 | 3 | 3        | #####    |
| 2 ES | 2020-12 | 1 ES-East    | 1 | 4 | 3.064417 | 1.114806 |
| 2 ES | 2020-12 | 1 ES-East    | 1 | 5 | 1        | 0        |
| 2 ES | 2020-12 | 1 ES-East    | 2 | 1 | 1.93015  | #####    |
| 2 ES | 2020-12 | 1 ES-East    | 2 | 2 | 2        | #####    |
| 2 ES | 2020-12 | 1 ES-East    | 2 | 3 | 3        | #####    |
| 2 ES | 2020-12 | 1 ES-East    | 2 | 4 | 1.5      | #####    |
| 2 ES | 2020-12 | 1 ES-East    | 2 | 5 | 1        | 0        |
| 2 ES | 2020-12 | 1 ES-East    | 3 | 1 | 4.14154  | 1.108573 |
| 2 ES | 2020-12 | 1 ES-East    | 3 | 3 | 3        | 0        |
| 2 ES | 2020-12 | 1 ES-East    | 3 | 4 | 5.5      | 1.767932 |
| 2 ES | 2020-12 | 1 ES-Island  | 1 | 1 | 3.494778 | 1.20726  |
| 2 ES | 2020-12 | 1 ES-Island  | 1 | 3 | 5.75     | 3.305134 |
| 2 ES | 2020-12 | 1 ES-Island  | 1 | 4 | 4.559857 | 1.530196 |
| 2 ES | 2020-12 | 1 ES-Island  | 1 | 5 | 1.596435 | #####    |
| 2 ES | 2020-12 | 1 ES-Island  | 2 | 1 | 3.503735 | 1.609013 |
| 2 ES | 2020-12 | 1 ES-Island  | 2 | 3 | 5.75     | 3.305134 |
| 2 ES | 2020-12 | 1 ES-Island  | 2 | 4 | 2        | 0        |
| 2 ES | 2020-12 | 1 ES-Island  | 2 | 5 | 1.666667 | #####    |
| 2 ES | 2020-12 | 1 ES-Island  | 3 | 1 | 3.475329 | 1.567005 |
| 2 ES | 2020-12 | 1 ES-Island  | 3 | 4 | 7        | 0        |
| 2 ES | 2020-12 | 1 ES-Island  | 3 | 5 | 1.5      | #####    |
| 2 ES | 2020-12 | 1 ES-Madrid  | 1 | 1 | 2.506762 | #####    |
| 2 ES | 2020-12 | 1 ES-Madrid  | 1 | 2 | 3        | #####    |
| 2 ES | 2020-12 | 1 ES-Madrid  | 1 | 3 | 1        | 0        |
| 2 ES | 2020-12 | 1 ES-Madrid  | 1 | 4 | 3        | 0        |
| 2 ES | 2020-12 | 1 ES-Madrid  | 1 | 5 | 3        | 0        |
| 2 ES | 2020-12 | 1 ES-Madrid  | 2 | 1 | 2.399609 | #####    |
| 2 ES | 2020-12 | 1 ES-Madrid  | 2 | 2 | 3        | #####    |
| 2 ES | 2020-12 | 1 ES-Madrid  | 2 | 3 | 1        | 0        |
| 2 ES | 2020-12 | 1 ES-Madrid  | 2 | 4 | 3        | 0        |
| 2 ES | 2020-12 | 1 ES-Madrid  | 3 | 1 | 3        | 0        |
| 2 ES | 2020-12 | 1 ES-Madrid  | 3 | 5 | 3        | 0        |
| 2 ES | 2020-12 | 1 ES-Northea | 1 | 1 | 3.295948 | 1.028582 |
| 2 ES | 2020-12 | 1 ES-Northea | 1 | 2 | 6        | 0        |
| 2 ES | 2020-12 | 1 ES-Northea | 1 | 3 | 3        | 0        |
| 2 ES | 2020-12 | 1 ES-Northea | 1 | 4 | 2.015793 | 1.304597 |
| 2 ES | 2020-12 | 1 ES-Northea | 1 | 5 | 2.145155 | #####    |
| 2 ES | 2020-12 | 1 ES-Northea | 2 | 1 | 3        | 1.27598  |
| 2 ES | 2020-12 | 1 ES-Northea | 2 | 3 | 3        | 0        |
| 2 ES | 2020-12 | 1 ES-Northea | 2 | 4 | 3        | 2.465996 |
| 2 ES | 2020-12 | 1 ES-Northea | 2 | 5 | 3        | 0        |
| 2 ES | 2020-12 | 1 ES-Northea | 3 | 1 | 3.483672 | 1.407973 |
| 2 ES | 2020-12 | 1 ES-Northea | 3 | 2 | 6        | 0        |
| 2 ES | 2020-12 | 1 ES-Northea | 3 | 4 | 1        | 0        |
| 2 ES | 2020-12 | 1 ES-Northea | 3 | 5 | 1        | 0        |
| 2 ES | 2020-12 | 1 ES-Northw  | 1 | 1 | 4.095322 | 1.058234 |
| 2 ES | 2020-12 | 1 ES-Northw  | 1 | 2 | 2.5      | #####    |
| 2 ES | 2020-12 | 1 ES-Northw  | 1 | 3 | 3.57209  | #####    |
| 2 ES | 2020-12 | 1 ES-Northw  | 1 | 4 | 5.189564 | 2.442125 |
| 2 ES | 2020-12 | 1 ES-Northw  | 1 | 5 | 0        | 0        |
| 2 ES | 2020-12 | 1 ES-Northw  | 2 | 1 | 4.664942 | 1.623389 |

|    |      |         |              |   |   |          |          |  |
|----|------|---------|--------------|---|---|----------|----------|--|
| 1  |      |         |              |   |   |          |          |  |
| 2  |      |         |              |   |   |          |          |  |
| 3  | 2 ES | 2020-12 | 1 ES-Northw  | 2 | 2 | 2.5      | #####    |  |
| 4  | 2 ES | 2020-12 | 1 ES-Northw  | 2 | 3 | 3.333333 | #####    |  |
| 5  | 2 ES | 2020-12 | 1 ES-Northw  | 2 | 4 | 8        | 4.344942 |  |
| 6  | 2 ES | 2020-12 | 1 ES-Northw  | 2 | 5 | 0        | 0        |  |
| 7  | 2 ES | 2020-12 | 1 ES-Northw  | 3 | 1 | 3.121291 | #####    |  |
| 8  | 2 ES | 2020-12 | 1 ES-Northw  | 3 | 3 | 4        | 0        |  |
| 9  | 2 ES | 2020-12 | 1 ES-Northw  | 3 | 4 | 2.5      | #####    |  |
| 10 | 2 ES | 2020-12 | 1 ES-Northw  | 3 | 5 | 0        | 0        |  |
| 11 | 2 ES | 2020-12 | 1 ES-Overall | 1 | 1 | 2.899051 | #####    |  |
| 12 | 2 ES | 2020-12 | 1 ES-Overall | 1 | 2 | 2.584143 | #####    |  |
| 13 | 2 ES | 2020-12 | 1 ES-Overall | 1 | 3 | 3.923905 | #####    |  |
| 14 | 2 ES | 2020-12 | 1 ES-Overall | 1 | 4 | 3.059974 | #####    |  |
| 15 | 2 ES | 2020-12 | 1 ES-Overall | 1 | 5 | 1.87158  | #####    |  |
| 16 | 2 ES | 2020-12 | 1 ES-Overall | 2 | 1 | 2.827704 | #####    |  |
| 17 | 2 ES | 2020-12 | 1 ES-Overall | 2 | 2 | 2.100085 | #####    |  |
| 18 | 2 ES | 2020-12 | 1 ES-Overall | 2 | 3 | 4.16311  | #####    |  |
| 19 | 2 ES | 2020-12 | 1 ES-Overall | 2 | 4 | 2.882265 | #####    |  |
| 20 | 2 ES | 2020-12 | 1 ES-Overall | 2 | 5 | 1.977748 | #####    |  |
| 21 | 2 ES | 2020-12 | 1 ES-Overall | 3 | 1 | 2.987052 | #####    |  |
| 22 | 2 ES | 2020-12 | 1 ES-Overall | 3 | 2 | 3.012626 | 1.210875 |  |
| 23 | 2 ES | 2020-12 | 1 ES-Overall | 3 | 3 | 3.280081 | #####    |  |
| 24 | 2 ES | 2020-12 | 1 ES-Overall | 3 | 4 | 3.27652  | #####    |  |
| 25 | 2 ES | 2020-12 | 1 ES-Overall | 3 | 5 | 1.730973 | #####    |  |
| 26 | 2 ES | 2020-12 | 1 ES-South   | 1 | 1 | 2.06416  | 1.024576 |  |
| 27 | 2 ES | 2020-12 | 1 ES-South   | 1 | 2 | #####    | #####    |  |
| 28 | 2 ES | 2020-12 | 1 ES-South   | 1 | 3 | 6.5      | 1.785524 |  |
| 29 | 2 ES | 2020-12 | 1 ES-South   | 1 | 4 | 2.704398 | #####    |  |
| 30 | 2 ES | 2020-12 | 1 ES-South   | 2 | 1 | 3.381071 | 1.120523 |  |
| 31 | 2 ES | 2020-12 | 1 ES-South   | 2 | 2 | 1.5      | #####    |  |
| 32 | 2 ES | 2020-12 | 1 ES-South   | 2 | 3 | 6.5      | 1.785524 |  |
| 33 | 2 ES | 2020-12 | 1 ES-South   | 2 | 4 | 1.5      | 1.060759 |  |
| 34 | 2 ES | 2020-12 | 1 ES-South   | 3 | 1 | #####    | #####    |  |
| 35 | 2 ES | 2020-12 | 1 ES-South   | 3 | 2 | 0        | 0        |  |
| 36 | 2 ES | 2020-12 | 1 ES-South   | 3 | 4 | 4        | 0        |  |
| 37 | 2 ES | 2020-12 | 2 ES-Center  | 1 | 1 | 2.379604 | #####    |  |
| 38 | 2 ES | 2020-12 | 2 ES-Center  | 1 | 2 | 2.666667 | #####    |  |
| 39 | 2 ES | 2020-12 | 2 ES-Center  | 1 | 3 | 3        | #####    |  |
| 40 | 2 ES | 2020-12 | 2 ES-Center  | 1 | 4 | 1.354172 | #####    |  |
| 41 | 2 ES | 2020-12 | 2 ES-Center  | 2 | 1 | 2.155945 | #####    |  |
| 42 | 2 ES | 2020-12 | 2 ES-Center  | 2 | 3 | 3        | #####    |  |
| 43 | 2 ES | 2020-12 | 2 ES-Center  | 2 | 4 | 1.666667 | #####    |  |
| 44 | 2 ES | 2020-12 | 2 ES-Center  | 3 | 1 | 2.435213 | #####    |  |
| 45 | 2 ES | 2020-12 | 2 ES-Center  | 3 | 2 | 2.666667 | #####    |  |
| 46 | 2 ES | 2020-12 | 2 ES-Center  | 3 | 4 | 1        | 0        |  |
| 47 | 2 ES | 2020-12 | 2 ES-East    | 1 | 1 | 1.958795 | #####    |  |
| 48 | 2 ES | 2020-12 | 2 ES-East    | 1 | 2 | 1.833333 | #####    |  |
| 49 | 2 ES | 2020-12 | 2 ES-East    | 1 | 3 | 2.342774 | #####    |  |
| 50 | 2 ES | 2020-12 | 2 ES-East    | 1 | 4 | 1.789622 | #####    |  |
| 51 | 2 ES | 2020-12 | 2 ES-East    | 1 | 5 | 1        | 0        |  |
| 52 | 2 ES | 2020-12 | 2 ES-East    | 2 | 1 | 1.682281 | #####    |  |
| 53 | 2 ES | 2020-12 | 2 ES-East    | 2 | 2 | 1.833333 | #####    |  |
| 54 | 2 ES | 2020-12 | 2 ES-East    | 2 | 3 | 2        | #####    |  |
| 55 | 2 ES | 2020-12 | 2 ES-East    | 2 | 4 | 1.333333 | #####    |  |
| 56 | 2 ES | 2020-12 | 2 ES-East    | 2 | 5 | 1        | 0        |  |
| 57 | 2 ES | 2020-12 | 2 ES-East    | 3 | 1 | 2.5      | #####    |  |
| 58 | 2 ES | 2020-12 | 2 ES-East    | 3 | 3 | 2.5      | #####    |  |
| 59 | 2 ES | 2020-12 | 2 ES-East    | 3 | 3 | 2.5      | #####    |  |
| 60 | 2 ES | 2020-12 | 2 ES-East    | 3 | 3 | 2.5      | #####    |  |

1  
2  
3  
4  
5  
6  
7  
8  
9  
10  
11  
12  
13  
14  
15  
16  
17  
18  
19  
20  
21  
22  
23  
24  
25  
26  
27  
28  
29  
30  
31  
32  
33  
34  
35  
36  
37  
38  
39  
40  
41  
42  
43  
44  
45  
46  
47  
48  
49  
50  
51  
52  
53  
54  
55  
56  
57  
58  
59  
60

|      |         |              |   |   |          |       |
|------|---------|--------------|---|---|----------|-------|
| 2 ES | 2020-12 | 2 ES-East    | 3 | 4 | 2.5      | ##### |
| 2 ES | 2020-12 | 2 ES-Island  | 1 | 1 | 1.634397 | ##### |
| 2 ES | 2020-12 | 2 ES-Island  | 1 | 3 | 2        | ##### |
| 2 ES | 2020-12 | 2 ES-Island  | 1 | 4 | 2.267957 | ##### |
| 2 ES | 2020-12 | 2 ES-Island  | 1 | 5 | 1        | 0     |
| 2 ES | 2020-12 | 2 ES-Island  | 2 | 1 | 1.602682 | ##### |
| 2 ES | 2020-12 | 2 ES-Island  | 2 | 3 | 2        | ##### |
| 2 ES | 2020-12 | 2 ES-Island  | 2 | 4 | 1.5      | ##### |
| 2 ES | 2020-12 | 2 ES-Island  | 2 | 5 | 1        | 0     |
| 2 ES | 2020-12 | 2 ES-Island  | 3 | 1 | 1.718302 | ##### |
| 2 ES | 2020-12 | 2 ES-Island  | 3 | 4 | 3        | 0     |
| 2 ES | 2020-12 | 2 ES-Island  | 3 | 5 | 1        | 0     |
| 2 ES | 2020-12 | 2 ES-Madrid  | 1 | 1 | 1.682337 | ##### |
| 2 ES | 2020-12 | 2 ES-Madrid  | 1 | 2 | 1.666667 | ##### |
| 2 ES | 2020-12 | 2 ES-Madrid  | 1 | 3 | 1        | 0     |
| 2 ES | 2020-12 | 2 ES-Madrid  | 1 | 4 | 3        | 0     |
| 2 ES | 2020-12 | 2 ES-Madrid  | 1 | 5 | 2        | 0     |
| 2 ES | 2020-12 | 2 ES-Madrid  | 2 | 1 | 1.613327 | ##### |
| 2 ES | 2020-12 | 2 ES-Madrid  | 2 | 2 | 1.666667 | ##### |
| 2 ES | 2020-12 | 2 ES-Madrid  | 2 | 3 | 1        | 0     |
| 2 ES | 2020-12 | 2 ES-Madrid  | 2 | 4 | 3        | 0     |
| 2 ES | 2020-12 | 2 ES-Madrid  | 3 | 1 | 2        | 0     |
| 2 ES | 2020-12 | 2 ES-Madrid  | 3 | 5 | 2        | 0     |
| 2 ES | 2020-12 | 2 ES-Northea | 1 | 1 | 2.21397  | ##### |
| 2 ES | 2020-12 | 2 ES-Northea | 1 | 2 | 4        | 0     |
| 2 ES | 2020-12 | 2 ES-Northea | 1 | 3 | 2.5      | ##### |
| 2 ES | 2020-12 | 2 ES-Northea | 1 | 4 | #####    | ##### |
| 2 ES | 2020-12 | 2 ES-Northea | 1 | 5 | 2.145155 | ##### |
| 2 ES | 2020-12 | 2 ES-Northea | 2 | 1 | 1.968058 | ##### |
| 2 ES | 2020-12 | 2 ES-Northea | 2 | 3 | 2.5      | ##### |
| 2 ES | 2020-12 | 2 ES-Northea | 2 | 4 | 1        | ##### |
| 2 ES | 2020-12 | 2 ES-Northea | 2 | 5 | 3        | 0     |
| 2 ES | 2020-12 | 2 ES-Northea | 3 | 1 | 2.384201 | ##### |
| 2 ES | 2020-12 | 2 ES-Northea | 3 | 2 | 4        | 0     |
| 2 ES | 2020-12 | 2 ES-Northea | 3 | 4 | #####    | ##### |
| 2 ES | 2020-12 | 2 ES-Northea | 3 | 5 | 1        | 0     |
| 2 ES | 2020-12 | 2 ES-Northw  | 1 | 1 | 2.421424 | ##### |
| 2 ES | 2020-12 | 2 ES-Northw  | 1 | 2 | 2        | 0     |
| 2 ES | 2020-12 | 2 ES-Northw  | 1 | 3 | 2.634917 | ##### |
| 2 ES | 2020-12 | 2 ES-Northw  | 1 | 4 | 2.255494 | ##### |
| 2 ES | 2020-12 | 2 ES-Northw  | 1 | 5 | 0        | 0     |
| 2 ES | 2020-12 | 2 ES-Northw  | 2 | 1 | 2.134944 | ##### |
| 2 ES | 2020-12 | 2 ES-Northw  | 2 | 2 | 2        | 0     |
| 2 ES | 2020-12 | 2 ES-Northw  | 2 | 3 | 2.285714 | ##### |
| 2 ES | 2020-12 | 2 ES-Northw  | 2 | 4 | 2        | ##### |
| 2 ES | 2020-12 | 2 ES-Northw  | 2 | 5 | 0        | 0     |
| 2 ES | 2020-12 | 2 ES-Northw  | 3 | 1 | 2.792883 | ##### |
| 2 ES | 2020-12 | 2 ES-Northw  | 3 | 3 | 3        | ##### |
| 2 ES | 2020-12 | 2 ES-Northw  | 3 | 4 | 2.5      | ##### |
| 2 ES | 2020-12 | 2 ES-Northw  | 3 | 5 | 0        | 0     |
| 2 ES | 2020-12 | 2 ES-Overall | 1 | 1 | 1.929863 | ##### |
| 2 ES | 2020-12 | 2 ES-Overall | 1 | 2 | 1.83739  | ##### |
| 2 ES | 2020-12 | 2 ES-Overall | 1 | 3 | 2.362102 | ##### |
| 2 ES | 2020-12 | 2 ES-Overall | 1 | 4 | 1.783452 | ##### |
| 2 ES | 2020-12 | 2 ES-Overall | 1 | 5 | 1.528684 | ##### |
| 2 ES | 2020-12 | 2 ES-Overall | 2 | 1 | 1.781847 | ##### |

|    |      |         |              |   |   |          |          |  |  |
|----|------|---------|--------------|---|---|----------|----------|--|--|
| 1  |      |         |              |   |   |          |          |  |  |
| 2  |      |         |              |   |   |          |          |  |  |
| 3  | 2 ES | 2020-12 | 2 ES-Overall | 2 | 2 | 1.64418  | #####    |  |  |
| 4  | 2 ES | 2020-12 | 2 ES-Overall | 2 | 3 | 2.197655 | #####    |  |  |
| 5  | 2 ES | 2020-12 | 2 ES-Overall | 2 | 4 | 1.499897 | #####    |  |  |
| 6  | 2 ES | 2020-12 | 2 ES-Overall | 2 | 5 | 1.721808 | #####    |  |  |
| 7  | 2 ES | 2020-12 | 2 ES-Overall | 3 | 1 | 2.103979 | #####    |  |  |
| 8  | 2 ES | 2020-12 | 2 ES-Overall | 3 | 2 | 2.008417 | #####    |  |  |
| 9  | 2 ES | 2020-12 | 2 ES-Overall | 3 | 3 | 2.64004  | #####    |  |  |
| 10 | 2 ES | 2020-12 | 2 ES-Overall | 3 | 4 | 2.128975 | #####    |  |  |
| 11 | 2 ES | 2020-12 | 2 ES-Overall | 3 | 5 | 1.272915 | #####    |  |  |
| 12 | 2 ES | 2020-12 | 2 ES-South   | 1 | 1 | 1.243946 | #####    |  |  |
| 13 | 2 ES | 2020-12 | 2 ES-South   | 1 | 2 | #####    | #####    |  |  |
| 14 | 2 ES | 2020-12 | 2 ES-South   | 1 | 3 | 2.75     | #####    |  |  |
| 15 | 2 ES | 2020-12 | 2 ES-South   | 1 | 4 | 2.704398 | #####    |  |  |
| 16 | 2 ES | 2020-12 | 2 ES-South   | 2 | 1 | 1.75425  | #####    |  |  |
| 17 | 2 ES | 2020-12 | 2 ES-South   | 2 | 2 | 1        | 0        |  |  |
| 18 | 2 ES | 2020-12 | 2 ES-South   | 2 | 3 | 2.75     | #####    |  |  |
| 19 | 2 ES | 2020-12 | 2 ES-South   | 2 | 4 | 1.5      | 1.060759 |  |  |
| 20 | 2 ES | 2020-12 | 2 ES-South   | 3 | 1 | #####    | #####    |  |  |
| 21 | 2 ES | 2020-12 | 2 ES-South   | 3 | 2 | 0        | 0        |  |  |
| 22 | 2 ES | 2020-12 | 2 ES-South   | 3 | 4 | 4        | 0        |  |  |
| 23 | 2 ES | 2020-12 | 3 ES-Center  | 1 | 1 | 0        | 0        |  |  |
| 24 | 2 ES | 2020-12 | 3 ES-Center  | 1 | 2 | 0        | 0        |  |  |
| 25 | 2 ES | 2020-12 | 3 ES-Center  | 1 | 3 | 0        | 0        |  |  |
| 26 | 2 ES | 2020-12 | 3 ES-Center  | 1 | 4 | 0        | 0        |  |  |
| 27 | 2 ES | 2020-12 | 3 ES-Center  | 2 | 1 | 0        | 0        |  |  |
| 28 | 2 ES | 2020-12 | 3 ES-Center  | 2 | 3 | 0        | 0        |  |  |
| 29 | 2 ES | 2020-12 | 3 ES-Center  | 2 | 4 | 0        | 0        |  |  |
| 30 | 2 ES | 2020-12 | 3 ES-Center  | 3 | 1 | 0        | 0        |  |  |
| 31 | 2 ES | 2020-12 | 3 ES-Center  | 3 | 2 | 0        | 0        |  |  |
| 32 | 2 ES | 2020-12 | 3 ES-Center  | 3 | 4 | 0        | 0        |  |  |
| 33 | 2 ES | 2020-12 | 3 ES-East    | 1 | 1 | 0        | 0        |  |  |
| 34 | 2 ES | 2020-12 | 3 ES-East    | 1 | 2 | 0        | 0        |  |  |
| 35 | 2 ES | 2020-12 | 3 ES-East    | 1 | 3 | 0        | 0        |  |  |
| 36 | 2 ES | 2020-12 | 3 ES-East    | 1 | 4 | 0        | 0        |  |  |
| 37 | 2 ES | 2020-12 | 3 ES-East    | 1 | 5 | 0        | 0        |  |  |
| 38 | 2 ES | 2020-12 | 3 ES-East    | 2 | 1 | 0        | 0        |  |  |
| 39 | 2 ES | 2020-12 | 3 ES-East    | 2 | 2 | 0        | 0        |  |  |
| 40 | 2 ES | 2020-12 | 3 ES-East    | 2 | 3 | 0        | 0        |  |  |
| 41 | 2 ES | 2020-12 | 3 ES-East    | 2 | 4 | 0        | 0        |  |  |
| 42 | 2 ES | 2020-12 | 3 ES-East    | 2 | 5 | 0        | 0        |  |  |
| 43 | 2 ES | 2020-12 | 3 ES-East    | 3 | 1 | 0        | 0        |  |  |
| 44 | 2 ES | 2020-12 | 3 ES-East    | 3 | 3 | 0        | 0        |  |  |
| 45 | 2 ES | 2020-12 | 3 ES-East    | 3 | 4 | 0        | 0        |  |  |
| 46 | 2 ES | 2020-12 | 3 ES-Island  | 1 | 1 | 0        | 0        |  |  |
| 47 | 2 ES | 2020-12 | 3 ES-Island  | 1 | 3 | 0        | 0        |  |  |
| 48 | 2 ES | 2020-12 | 3 ES-Island  | 1 | 4 | 0        | 0        |  |  |
| 49 | 2 ES | 2020-12 | 3 ES-Island  | 1 | 5 | 0        | 0        |  |  |
| 50 | 2 ES | 2020-12 | 3 ES-Island  | 2 | 1 | 0        | 0        |  |  |
| 51 | 2 ES | 2020-12 | 3 ES-Island  | 2 | 3 | 0        | 0        |  |  |
| 52 | 2 ES | 2020-12 | 3 ES-Island  | 2 | 4 | 0        | 0        |  |  |
| 53 | 2 ES | 2020-12 | 3 ES-Island  | 2 | 5 | 0        | 0        |  |  |
| 54 | 2 ES | 2020-12 | 3 ES-Island  | 3 | 1 | 0        | 0        |  |  |
| 55 | 2 ES | 2020-12 | 3 ES-Island  | 3 | 4 | 0        | 0        |  |  |
| 56 | 2 ES | 2020-12 | 3 ES-Island  | 3 | 5 | 0        | 0        |  |  |
| 57 | 2 ES | 2020-12 | 3 ES-Madrid  | 1 | 1 | 0        | 0        |  |  |
| 58 | 2 ES | 2020-12 | 3 ES-Madrid  | 1 | 2 | 0        | 0        |  |  |
| 59 | 2 ES | 2020-12 | 3 ES-Madrid  | 1 | 2 | 0        | 0        |  |  |
| 60 | 2 ES | 2020-12 | 3 ES-Madrid  | 1 | 2 | 0        | 0        |  |  |

|    |      |         |              |   |   |   |   |
|----|------|---------|--------------|---|---|---|---|
| 1  |      |         |              |   |   |   |   |
| 2  |      |         |              |   |   |   |   |
| 3  | 2 ES | 2020-12 | 3 ES-Madrid  | 1 | 3 | 0 | 0 |
| 4  | 2 ES | 2020-12 | 3 ES-Madrid  | 1 | 4 | 0 | 0 |
| 5  | 2 ES | 2020-12 | 3 ES-Madrid  | 1 | 5 | 0 | 0 |
| 6  | 2 ES | 2020-12 | 3 ES-Madrid  | 2 | 1 | 0 | 0 |
| 7  | 2 ES | 2020-12 | 3 ES-Madrid  | 2 | 2 | 0 | 0 |
| 8  | 2 ES | 2020-12 | 3 ES-Madrid  | 2 | 3 | 0 | 0 |
| 9  | 2 ES | 2020-12 | 3 ES-Madrid  | 2 | 4 | 0 | 0 |
| 10 | 2 ES | 2020-12 | 3 ES-Madrid  | 3 | 1 | 0 | 0 |
| 11 | 2 ES | 2020-12 | 3 ES-Madrid  | 3 | 5 | 0 | 0 |
| 12 | 2 ES | 2020-12 | 3 ES-Northea | 1 | 1 | 0 | 0 |
| 13 | 2 ES | 2020-12 | 3 ES-Northea | 1 | 2 | 0 | 0 |
| 14 | 2 ES | 2020-12 | 3 ES-Northea | 1 | 3 | 0 | 0 |
| 15 | 2 ES | 2020-12 | 3 ES-Northea | 1 | 4 | 0 | 0 |
| 16 | 2 ES | 2020-12 | 3 ES-Northea | 1 | 5 | 0 | 0 |
| 17 | 2 ES | 2020-12 | 3 ES-Northea | 2 | 1 | 0 | 0 |
| 18 | 2 ES | 2020-12 | 3 ES-Northea | 2 | 3 | 0 | 0 |
| 19 | 2 ES | 2020-12 | 3 ES-Northea | 2 | 4 | 0 | 0 |
| 20 | 2 ES | 2020-12 | 3 ES-Northea | 2 | 5 | 0 | 0 |
| 21 | 2 ES | 2020-12 | 3 ES-Northea | 3 | 1 | 0 | 0 |
| 22 | 2 ES | 2020-12 | 3 ES-Northea | 3 | 2 | 0 | 0 |
| 23 | 2 ES | 2020-12 | 3 ES-Northea | 3 | 4 | 0 | 0 |
| 24 | 2 ES | 2020-12 | 3 ES-Northea | 3 | 5 | 0 | 0 |
| 25 | 2 ES | 2020-12 | 3 ES-Northea | 3 | 5 | 0 | 0 |
| 26 | 2 ES | 2020-12 | 3 ES-Northw  | 1 | 1 | 0 | 0 |
| 27 | 2 ES | 2020-12 | 3 ES-Northw  | 1 | 2 | 0 | 0 |
| 28 | 2 ES | 2020-12 | 3 ES-Northw  | 1 | 3 | 0 | 0 |
| 29 | 2 ES | 2020-12 | 3 ES-Northw  | 1 | 4 | 0 | 0 |
| 30 | 2 ES | 2020-12 | 3 ES-Northw  | 1 | 5 | 0 | 0 |
| 31 | 2 ES | 2020-12 | 3 ES-Northw  | 2 | 1 | 0 | 0 |
| 32 | 2 ES | 2020-12 | 3 ES-Northw  | 2 | 2 | 0 | 0 |
| 33 | 2 ES | 2020-12 | 3 ES-Northw  | 2 | 3 | 0 | 0 |
| 34 | 2 ES | 2020-12 | 3 ES-Northw  | 2 | 4 | 0 | 0 |
| 35 | 2 ES | 2020-12 | 3 ES-Northw  | 2 | 5 | 0 | 0 |
| 36 | 2 ES | 2020-12 | 3 ES-Northw  | 3 | 1 | 0 | 0 |
| 37 | 2 ES | 2020-12 | 3 ES-Northw  | 3 | 3 | 0 | 0 |
| 38 | 2 ES | 2020-12 | 3 ES-Northw  | 3 | 4 | 0 | 0 |
| 39 | 2 ES | 2020-12 | 3 ES-Northw  | 3 | 5 | 0 | 0 |
| 40 | 2 ES | 2020-12 | 3 ES-Overall | 1 | 1 | 0 | 0 |
| 41 | 2 ES | 2020-12 | 3 ES-Overall | 1 | 2 | 0 | 0 |
| 42 | 2 ES | 2020-12 | 3 ES-Overall | 1 | 3 | 0 | 0 |
| 43 | 2 ES | 2020-12 | 3 ES-Overall | 1 | 4 | 0 | 0 |
| 44 | 2 ES | 2020-12 | 3 ES-Overall | 1 | 5 | 0 | 0 |
| 45 | 2 ES | 2020-12 | 3 ES-Overall | 2 | 1 | 0 | 0 |
| 46 | 2 ES | 2020-12 | 3 ES-Overall | 2 | 2 | 0 | 0 |
| 47 | 2 ES | 2020-12 | 3 ES-Overall | 2 | 3 | 0 | 0 |
| 48 | 2 ES | 2020-12 | 3 ES-Overall | 2 | 4 | 0 | 0 |
| 49 | 2 ES | 2020-12 | 3 ES-Overall | 2 | 5 | 0 | 0 |
| 50 | 2 ES | 2020-12 | 3 ES-Overall | 3 | 1 | 0 | 0 |
| 51 | 2 ES | 2020-12 | 3 ES-Overall | 3 | 2 | 0 | 0 |
| 52 | 2 ES | 2020-12 | 3 ES-Overall | 3 | 3 | 0 | 0 |
| 53 | 2 ES | 2020-12 | 3 ES-Overall | 3 | 4 | 0 | 0 |
| 54 | 2 ES | 2020-12 | 3 ES-Overall | 3 | 5 | 0 | 0 |
| 55 | 2 ES | 2020-12 | 3 ES-South   | 1 | 1 | 0 | 0 |
| 56 | 2 ES | 2020-12 | 3 ES-South   | 1 | 2 | 0 | 0 |
| 57 | 2 ES | 2020-12 | 3 ES-South   | 1 | 3 | 0 | 0 |
| 58 | 2 ES | 2020-12 | 3 ES-South   | 1 | 4 | 0 | 0 |
| 59 | 2 ES | 2020-12 | 3 ES-South   | 1 | 4 | 0 | 0 |
| 60 | 2 ES | 2020-12 | 3 ES-South   | 2 | 1 | 0 | 0 |



|    |      |         |             |   |   |          |          |  |
|----|------|---------|-------------|---|---|----------|----------|--|
| 1  |      |         |             |   |   |          |          |  |
| 2  |      |         |             |   |   |          |          |  |
| 3  | 2 ES | 2020-12 | 3 ES-South  | 2 | 2 | 0        | 0        |  |
| 4  | 2 ES | 2020-12 | 3 ES-South  | 2 | 3 | 0        | 0        |  |
| 5  | 2 ES | 2020-12 | 3 ES-South  | 2 | 4 | 0        | 0        |  |
| 6  | 2 ES | 2020-12 | 3 ES-South  | 3 | 1 | 0        | 0        |  |
| 7  | 2 ES | 2020-12 | 3 ES-South  | 3 | 2 | 0        | 0        |  |
| 8  | 2 ES | 2020-12 | 3 ES-South  | 3 | 4 | 0        | 0        |  |
| 9  | 2 ES | 2020-12 | 4 ES-Center | 1 | 1 | #####    | #####    |  |
| 10 | 2 ES | 2020-12 | 4 ES-Center | 1 | 2 | 0        | 0        |  |
| 11 | 2 ES | 2020-12 | 4 ES-Center | 1 | 3 | 6.666667 | 5.443818 |  |
| 12 | 2 ES | 2020-12 | 4 ES-Center | 1 | 4 | 0        | 0        |  |
| 13 | 2 ES | 2020-12 | 4 ES-Center | 2 | 1 | 2.631486 | 2.469311 |  |
| 14 | 2 ES | 2020-12 | 4 ES-Center | 2 | 3 | 6.666667 | 5.443818 |  |
| 15 | 2 ES | 2020-12 | 4 ES-Center | 2 | 4 | 0        | 0        |  |
| 16 | 2 ES | 2020-12 | 4 ES-Center | 3 | 1 | 0        | 0        |  |
| 17 | 2 ES | 2020-12 | 4 ES-Center | 3 | 2 | 0        | 0        |  |
| 18 | 2 ES | 2020-12 | 4 ES-Center | 3 | 4 | 0        | 0        |  |
| 19 | 2 ES | 2020-12 | 4 ES-East   | 1 | 1 | #####    | #####    |  |
| 20 | 2 ES | 2020-12 | 4 ES-East   | 1 | 2 | 0        | 0        |  |
| 21 | 2 ES | 2020-12 | 4 ES-East   | 1 | 3 | #####    | #####    |  |
| 22 | 2 ES | 2020-12 | 4 ES-East   | 1 | 4 | #####    | #####    |  |
| 23 | 2 ES | 2020-12 | 4 ES-East   | 1 | 5 | 0        | 0        |  |
| 24 | 2 ES | 2020-12 | 4 ES-East   | 2 | 1 | 0        | 0        |  |
| 25 | 2 ES | 2020-12 | 4 ES-East   | 2 | 2 | 0        | 0        |  |
| 26 | 2 ES | 2020-12 | 4 ES-East   | 2 | 3 | 0        | 0        |  |
| 27 | 2 ES | 2020-12 | 4 ES-East   | 2 | 4 | 0        | 0        |  |
| 28 | 2 ES | 2020-12 | 4 ES-East   | 2 | 5 | 0        | 0        |  |
| 29 | 2 ES | 2020-12 | 4 ES-East   | 3 | 1 | 1.443781 | #####    |  |
| 30 | 2 ES | 2020-12 | 4 ES-East   | 3 | 3 | 1        | #####    |  |
| 31 | 2 ES | 2020-12 | 4 ES-East   | 3 | 4 | 2.5      | 1.767932 |  |
| 32 | 2 ES | 2020-12 | 4 ES-Island | 1 | 1 | 1.214536 | 1.082406 |  |
| 33 | 2 ES | 2020-12 | 4 ES-Island | 1 | 3 | 3.75     | 3.247898 |  |
| 34 | 2 ES | 2020-12 | 4 ES-Island | 1 | 4 | 0        | 0        |  |
| 35 | 2 ES | 2020-12 | 4 ES-Island | 1 | 5 | #####    | #####    |  |
| 36 | 2 ES | 2020-12 | 4 ES-Island | 2 | 1 | 1.773931 | 1.538226 |  |
| 37 | 2 ES | 2020-12 | 4 ES-Island | 2 | 3 | 3.75     | 3.247898 |  |
| 38 | 2 ES | 2020-12 | 4 ES-Island | 2 | 4 | 0        | 0        |  |
| 39 | 2 ES | 2020-12 | 4 ES-Island | 2 | 5 | #####    | #####    |  |
| 40 | 2 ES | 2020-12 | 4 ES-Island | 3 | 1 | 0        | 0        |  |
| 41 | 2 ES | 2020-12 | 4 ES-Island | 3 | 4 | 0        | 0        |  |
| 42 | 2 ES | 2020-12 | 4 ES-Island | 3 | 5 | 0        | 0        |  |
| 43 | 2 ES | 2020-12 | 4 ES-Madrid | 1 | 1 | 0        | 0        |  |
| 44 | 2 ES | 2020-12 | 4 ES-Madrid | 1 | 2 | 0        | 0        |  |
| 45 | 2 ES | 2020-12 | 4 ES-Madrid | 1 | 3 | 0        | 0        |  |
| 46 | 2 ES | 2020-12 | 4 ES-Madrid | 1 | 4 | 0        | 0        |  |
| 47 | 2 ES | 2020-12 | 4 ES-Madrid | 1 | 5 | 0        | 0        |  |
| 48 | 2 ES | 2020-12 | 4 ES-Madrid | 2 | 1 | 0        | 0        |  |
| 49 | 2 ES | 2020-12 | 4 ES-Madrid | 2 | 2 | 0        | 0        |  |
| 50 | 2 ES | 2020-12 | 4 ES-Madrid | 2 | 3 | 0        | 0        |  |
| 51 | 2 ES | 2020-12 | 4 ES-Madrid | 2 | 4 | 0        | 0        |  |
| 52 | 2 ES | 2020-12 | 4 ES-Madrid | 3 | 1 | 0        | 0        |  |
| 53 | 2 ES | 2020-12 | 4 ES-Madrid | 3 | 5 | 0        | 0        |  |
| 54 | 2 ES | 2020-12 | 4 ES-Northe | 1 | 1 | #####    | #####    |  |
| 55 | 2 ES | 2020-12 | 4 ES-Northe | 1 | 2 | 0        | 0        |  |
| 56 | 2 ES | 2020-12 | 4 ES-Northe | 1 | 3 | 0.5      | #####    |  |
| 57 | 2 ES | 2020-12 | 4 ES-Northe | 1 | 4 | 1.015793 | #####    |  |
| 58 | 2 ES | 2020-12 | 4 ES-Northe | 1 | 5 | 0        | 0        |  |
| 59 | 2 ES | 2020-12 | 4 ES-Northe | 1 | 5 | 0        | 0        |  |
| 60 | 2 ES | 2020-12 | 4 ES-Northe | 1 | 5 | 0        | 0        |  |

1  
2  
3  
4  
5  
6  
7  
8  
9  
10  
11  
12  
13  
14  
15  
16  
17  
18  
19  
20  
21  
22  
23  
24  
25  
26  
27  
28  
29  
30  
31  
32  
33  
34  
35  
36  
37  
38  
39  
40  
41  
42  
43  
44  
45  
46  
47  
48  
49  
50  
51  
52  
53  
54  
55  
56  
57  
58  
59  
60

|      |         |              |   |   |          |          |
|------|---------|--------------|---|---|----------|----------|
| 2 ES | 2020-12 | 4 ES-Northe  | 2 | 1 | 1.031942 | #####    |
| 2 ES | 2020-12 | 4 ES-Northe  | 2 | 3 | 0.5      | #####    |
| 2 ES | 2020-12 | 4 ES-Northe  | 2 | 4 | 2        | 1.789021 |
| 2 ES | 2020-12 | 4 ES-Northe  | 2 | 5 | 0        | 0        |
| 2 ES | 2020-12 | 4 ES-Northe  | 3 | 1 | 0        | 0        |
| 2 ES | 2020-12 | 4 ES-Northe  | 3 | 2 | 0        | 0        |
| 2 ES | 2020-12 | 4 ES-Northe  | 3 | 4 | 0        | 0        |
| 2 ES | 2020-12 | 4 ES-Northe  | 3 | 5 | 0        | 0        |
| 2 ES | 2020-12 | 4 ES-Northw  | 1 | 1 | #####    | #####    |
| 2 ES | 2020-12 | 4 ES-Northw  | 1 | 2 | 0        | 0        |
| 2 ES | 2020-12 | 4 ES-Northw  | 1 | 3 | #####    | #####    |
| 2 ES | 2020-12 | 4 ES-Northw  | 1 | 4 | 2.811816 | 2.734856 |
| 2 ES | 2020-12 | 4 ES-Northw  | 1 | 5 | 0        | 0        |
| 2 ES | 2020-12 | 4 ES-Northw  | 2 | 1 | 1.681286 | 1.419853 |
| 2 ES | 2020-12 | 4 ES-Northw  | 2 | 2 | 0        | 0        |
| 2 ES | 2020-12 | 4 ES-Northw  | 2 | 3 | #####    | #####    |
| 2 ES | 2020-12 | 4 ES-Northw  | 2 | 4 | 5.75     | 4.980111 |
| 2 ES | 2020-12 | 4 ES-Northw  | 2 | 5 | 0        | 0        |
| 2 ES | 2020-12 | 4 ES-Northw  | 3 | 1 | 0        | 0        |
| 2 ES | 2020-12 | 4 ES-Northw  | 3 | 3 | 0        | 0        |
| 2 ES | 2020-12 | 4 ES-Northw  | 3 | 4 | 0        | 0        |
| 2 ES | 2020-12 | 4 ES-Northw  | 3 | 5 | 0        | 0        |
| 2 ES | 2020-12 | 4 ES-Overall | 1 | 1 | #####    | #####    |
| 2 ES | 2020-12 | 4 ES-Overall | 1 | 2 | 0        | 0        |
| 2 ES | 2020-12 | 4 ES-Overall | 1 | 3 | 1.635623 | #####    |
| 2 ES | 2020-12 | 4 ES-Overall | 1 | 4 | #####    | #####    |
| 2 ES | 2020-12 | 4 ES-Overall | 1 | 5 | #####    | #####    |
| 2 ES | 2020-12 | 4 ES-Overall | 2 | 1 | #####    | #####    |
| 2 ES | 2020-12 | 4 ES-Overall | 2 | 2 | 0        | 0        |
| 2 ES | 2020-12 | 4 ES-Overall | 2 | 3 | 2.214139 | #####    |
| 2 ES | 2020-12 | 4 ES-Overall | 2 | 4 | 1.037092 | #####    |
| 2 ES | 2020-12 | 4 ES-Overall | 2 | 5 | #####    | #####    |
| 2 ES | 2020-12 | 4 ES-Overall | 3 | 1 | #####    | #####    |
| 2 ES | 2020-12 | 4 ES-Overall | 3 | 2 | 0        | 0        |
| 2 ES | 2020-12 | 4 ES-Overall | 3 | 3 | #####    | #####    |
| 2 ES | 2020-12 | 4 ES-Overall | 3 | 4 | #####    | #####    |
| 2 ES | 2020-12 | 4 ES-Overall | 3 | 5 | 0        | 0        |
| 2 ES | 2020-12 | 4 ES-South   | 1 | 1 | #####    | #####    |
| 2 ES | 2020-12 | 4 ES-South   | 1 | 2 | 0        | 0        |
| 2 ES | 2020-12 | 4 ES-South   | 1 | 3 | 3.75     | 1.948739 |
| 2 ES | 2020-12 | 4 ES-South   | 1 | 4 | #####    | #####    |
| 2 ES | 2020-12 | 4 ES-South   | 2 | 1 | #####    | #####    |
| 2 ES | 2020-12 | 4 ES-South   | 2 | 2 | 0        | 0        |
| 2 ES | 2020-12 | 4 ES-South   | 2 | 3 | 3.75     | 1.948739 |
| 2 ES | 2020-12 | 4 ES-South   | 2 | 4 | 0        | 0        |
| 2 ES | 2020-12 | 4 ES-South   | 3 | 1 | #####    | #####    |
| 2 ES | 2020-12 | 4 ES-South   | 3 | 2 | 0        | 0        |
| 2 ES | 2020-12 | 4 ES-South   | 3 | 4 | 1.5      | 1.060759 |
| 2 ES | 2020-12 | 5 ES-Center  | 1 | 1 | 1.178743 | #####    |
| 2 ES | 2020-12 | 5 ES-Center  | 1 | 2 | 1.333333 | #####    |
| 2 ES | 2020-12 | 5 ES-Center  | 1 | 3 | 2.5      | 1.767932 |
| 2 ES | 2020-12 | 5 ES-Center  | 1 | 4 | #####    | #####    |
| 2 ES | 2020-12 | 5 ES-Center  | 2 | 1 | 1.280281 | #####    |
| 2 ES | 2020-12 | 5 ES-Center  | 2 | 3 | 2.5      | 1.767932 |
| 2 ES | 2020-12 | 5 ES-Center  | 2 | 4 | 0.75     | #####    |
| 2 ES | 2020-12 | 5 ES-Center  | 3 | 1 | 1.14817  | #####    |

|    |      |         |              |   |   |          |       |          |
|----|------|---------|--------------|---|---|----------|-------|----------|
| 1  |      |         |              |   |   |          |       |          |
| 2  |      |         |              |   |   |          |       |          |
| 3  | 2 ES | 2020-12 | 5 ES-Center  | 3 | 2 | 1.333333 | ##### |          |
| 4  | 2 ES | 2020-12 | 5 ES-Center  | 3 | 4 | 0        |       | 0        |
| 5  | 2 ES | 2020-12 | 5 ES-East    | 1 | 1 | #####    | ##### |          |
| 6  | 2 ES | 2020-12 | 5 ES-East    | 1 | 2 | #####    | ##### |          |
| 7  | 2 ES | 2020-12 | 5 ES-East    | 1 | 3 | 1.45734  | ##### |          |
| 8  | 2 ES | 2020-12 | 5 ES-East    | 1 | 4 | #####    | ##### |          |
| 9  | 2 ES | 2020-12 | 5 ES-East    | 1 | 5 | 0        |       | 0        |
| 10 | 2 ES | 2020-12 | 5 ES-East    | 2 | 1 | #####    | ##### |          |
| 11 | 2 ES | 2020-12 | 5 ES-East    | 2 | 2 | #####    | ##### |          |
| 12 | 2 ES | 2020-12 | 5 ES-East    | 2 | 3 | 1.333333 | ##### |          |
| 13 | 2 ES | 2020-12 | 5 ES-East    | 2 | 4 | #####    | ##### |          |
| 14 | 2 ES | 2020-12 | 5 ES-East    | 2 | 5 | 0        |       | 0        |
| 15 | 2 ES | 2020-12 | 5 ES-East    | 3 | 1 | 1.204146 | ##### |          |
| 16 | 2 ES | 2020-12 | 5 ES-East    | 3 | 3 | 1.5      |       | 1.060759 |
| 17 | 2 ES | 2020-12 | 5 ES-East    | 3 | 4 | 0.5      | ##### |          |
| 18 | 2 ES | 2020-12 | 5 ES-Island  | 1 | 1 | #####    | ##### |          |
| 19 | 2 ES | 2020-12 | 5 ES-Island  | 1 | 3 | #####    | ##### |          |
| 20 | 2 ES | 2020-12 | 5 ES-Island  | 1 | 4 | 2.2919   |       | 1.084948 |
| 21 | 2 ES | 2020-12 | 5 ES-Island  | 1 | 5 | #####    | ##### |          |
| 22 | 2 ES | 2020-12 | 5 ES-Island  | 2 | 1 | #####    | ##### |          |
| 23 | 2 ES | 2020-12 | 5 ES-Island  | 2 | 3 | #####    | ##### |          |
| 24 | 2 ES | 2020-12 | 5 ES-Island  | 2 | 4 | 0.5      | ##### |          |
| 25 | 2 ES | 2020-12 | 5 ES-Island  | 2 | 5 | #####    | ##### |          |
| 26 | 2 ES | 2020-12 | 5 ES-Island  | 3 | 1 | 1.757028 |       | 1.012388 |
| 27 | 2 ES | 2020-12 | 5 ES-Island  | 3 | 4 | 4        |       | 0        |
| 28 | 2 ES | 2020-12 | 5 ES-Island  | 3 | 5 | 0.5      | ##### |          |
| 29 | 2 ES | 2020-12 | 5 ES-Madrid  | 1 | 1 | #####    | ##### |          |
| 30 | 2 ES | 2020-12 | 5 ES-Madrid  | 1 | 2 | 1.333333 | ##### |          |
| 31 | 2 ES | 2020-12 | 5 ES-Madrid  | 1 | 3 | 0        |       | 0        |
| 32 | 2 ES | 2020-12 | 5 ES-Madrid  | 1 | 4 | 0        |       | 0        |
| 33 | 2 ES | 2020-12 | 5 ES-Madrid  | 1 | 5 | 1        |       | 0        |
| 34 | 2 ES | 2020-12 | 5 ES-Madrid  | 2 | 1 | #####    | ##### |          |
| 35 | 2 ES | 2020-12 | 5 ES-Madrid  | 2 | 2 | 1.333333 | ##### |          |
| 36 | 2 ES | 2020-12 | 5 ES-Madrid  | 2 | 3 | 0        |       | 0        |
| 37 | 2 ES | 2020-12 | 5 ES-Madrid  | 2 | 4 | 0        |       | 0        |
| 38 | 2 ES | 2020-12 | 5 ES-Madrid  | 3 | 1 | 1        |       | 0        |
| 39 | 2 ES | 2020-12 | 5 ES-Madrid  | 3 | 5 | 1        |       | 0        |
| 40 | 2 ES | 2020-12 | 5 ES-Northea | 1 | 1 | #####    | ##### |          |
| 41 | 2 ES | 2020-12 | 5 ES-Northea | 1 | 2 | 2        |       | 0        |
| 42 | 2 ES | 2020-12 | 5 ES-Northea | 1 | 3 | 0        |       | 0        |
| 43 | 2 ES | 2020-12 | 5 ES-Northea | 1 | 4 | #####    | ##### |          |
| 44 | 2 ES | 2020-12 | 5 ES-Northea | 1 | 5 | 0        |       | 0        |
| 45 | 2 ES | 2020-12 | 5 ES-Northea | 2 | 1 | 0        |       | 0        |
| 46 | 2 ES | 2020-12 | 5 ES-Northea | 2 | 3 | 0        |       | 0        |
| 47 | 2 ES | 2020-12 | 5 ES-Northea | 2 | 4 | 0        |       | 0        |
| 48 | 2 ES | 2020-12 | 5 ES-Northea | 2 | 5 | 0        |       | 0        |
| 49 | 2 ES | 2020-12 | 5 ES-Northea | 3 | 1 | 1.099471 | ##### |          |
| 50 | 2 ES | 2020-12 | 5 ES-Northea | 3 | 2 | 2        |       | 0        |
| 51 | 2 ES | 2020-12 | 5 ES-Northea | 3 | 4 | #####    | ##### |          |
| 52 | 2 ES | 2020-12 | 5 ES-Northea | 3 | 5 | 0        |       | 0        |
| 53 | 2 ES | 2020-12 | 5 ES-Northw  | 1 | 1 | #####    | ##### |          |
| 54 | 2 ES | 2020-12 | 5 ES-Northw  | 1 | 2 | 0.5      | ##### |          |
| 55 | 2 ES | 2020-12 | 5 ES-Northw  | 1 | 3 | #####    | ##### |          |
| 56 | 2 ES | 2020-12 | 5 ES-Northw  | 1 | 4 | #####    | ##### |          |
| 57 | 2 ES | 2020-12 | 5 ES-Northw  | 1 | 5 | 1.407631 | ##### |          |
| 58 | 2 ES | 2020-12 | 5 ES-Northw  | 2 | 1 | #####    | ##### |          |
| 59 | 2 ES | 2020-12 | 5 ES-Northw  | 2 |   |          |       |          |
| 60 | 2 ES | 2020-12 | 5 ES-Northw  | 2 |   |          |       |          |

|    |      |         |              |   |   |          |          |  |  |
|----|------|---------|--------------|---|---|----------|----------|--|--|
| 1  |      |         |              |   |   |          |          |  |  |
| 2  |      |         |              |   |   |          |          |  |  |
| 3  | 2 ES | 2020-12 | 5 ES-Northw  | 2 | 2 | 0.5      | #####    |  |  |
| 4  | 2 ES | 2020-12 | 5 ES-Northw  | 2 | 3 | #####    | #####    |  |  |
| 5  | 2 ES | 2020-12 | 5 ES-Northw  | 2 | 4 | 0.25     | #####    |  |  |
| 6  | 2 ES | 2020-12 | 5 ES-Northw  | 2 | 5 | 1        | 0        |  |  |
| 7  | 2 ES | 2020-12 | 5 ES-Northw  | 3 | 1 | #####    | #####    |  |  |
| 8  | 2 ES | 2020-12 | 5 ES-Northw  | 3 | 3 | 0        | 0        |  |  |
| 9  | 2 ES | 2020-12 | 5 ES-Northw  | 3 | 4 | 0        | 0        |  |  |
| 10 | 2 ES | 2020-12 | 5 ES-Northw  | 3 | 5 | 2        | 0        |  |  |
| 11 | 2 ES | 2020-12 | 5 ES-Overall | 1 | 1 | #####    | #####    |  |  |
| 12 | 2 ES | 2020-12 | 5 ES-Overall | 1 | 2 | #####    | #####    |  |  |
| 13 | 2 ES | 2020-12 | 5 ES-Overall | 1 | 3 | #####    | #####    |  |  |
| 14 | 2 ES | 2020-12 | 5 ES-Overall | 1 | 4 | #####    | #####    |  |  |
| 15 | 2 ES | 2020-12 | 5 ES-Overall | 1 | 5 | #####    | #####    |  |  |
| 16 | 2 ES | 2020-12 | 5 ES-Overall | 2 | 1 | #####    | #####    |  |  |
| 17 | 2 ES | 2020-12 | 5 ES-Overall | 2 | 2 | #####    | #####    |  |  |
| 18 | 2 ES | 2020-12 | 5 ES-Overall | 2 | 3 | #####    | #####    |  |  |
| 19 | 2 ES | 2020-12 | 5 ES-Overall | 2 | 4 | #####    | #####    |  |  |
| 20 | 2 ES | 2020-12 | 5 ES-Overall | 2 | 5 | #####    | #####    |  |  |
| 21 | 2 ES | 2020-12 | 5 ES-Overall | 2 | 1 | #####    | #####    |  |  |
| 22 | 2 ES | 2020-12 | 5 ES-Overall | 3 | 2 | 1.004209 | #####    |  |  |
| 23 | 2 ES | 2020-12 | 5 ES-Overall | 3 | 3 | 1.255732 | #####    |  |  |
| 24 | 2 ES | 2020-12 | 5 ES-Overall | 3 | 4 | #####    | #####    |  |  |
| 25 | 2 ES | 2020-12 | 5 ES-Overall | 3 | 5 | #####    | #####    |  |  |
| 26 | 2 ES | 2020-12 | 5 ES-Overall | 3 | 1 | #####    | #####    |  |  |
| 27 | 2 ES | 2020-12 | 5 ES-South   | 1 | 1 | #####    | #####    |  |  |
| 28 | 2 ES | 2020-12 | 5 ES-South   | 1 | 2 | #####    | #####    |  |  |
| 29 | 2 ES | 2020-12 | 5 ES-South   | 1 | 3 | 0        | 0        |  |  |
| 30 | 2 ES | 2020-12 | 5 ES-South   | 1 | 4 | #####    | #####    |  |  |
| 31 | 2 ES | 2020-12 | 5 ES-South   | 2 | 1 | #####    | #####    |  |  |
| 32 | 2 ES | 2020-12 | 5 ES-South   | 2 | 2 | 0.25     | #####    |  |  |
| 33 | 2 ES | 2020-12 | 5 ES-South   | 2 | 3 | 0        | 0        |  |  |
| 34 | 2 ES | 2020-12 | 5 ES-South   | 2 | 4 | 0        | 0        |  |  |
| 35 | 2 ES | 2020-12 | 5 ES-South   | 3 | 1 | #####    | #####    |  |  |
| 36 | 2 ES | 2020-12 | 5 ES-South   | 3 | 2 | 0        | 0        |  |  |
| 37 | 2 ES | 2020-12 | 5 ES-South   | 3 | 4 | 0.5      | #####    |  |  |
| 38 | 2 ES | 2020-13 | 1 ES-Center  | 1 | 1 | 2.847522 | #####    |  |  |
| 39 | 2 ES | 2020-13 | 1 ES-Center  | 1 | 2 | 5.276721 | 2.042162 |  |  |
| 40 | 2 ES | 2020-13 | 1 ES-Center  | 1 | 3 | 3.010178 | #####    |  |  |
| 41 | 2 ES | 2020-13 | 1 ES-Center  | 1 | 4 | 2.650704 | #####    |  |  |
| 42 | 2 ES | 2020-13 | 1 ES-Center  | 1 | 5 | 1.598394 | #####    |  |  |
| 43 | 2 ES | 2020-13 | 1 ES-Center  | 2 | 1 | 2.308769 | #####    |  |  |
| 44 | 2 ES | 2020-13 | 1 ES-Center  | 2 | 2 | 2.9      | #####    |  |  |
| 45 | 2 ES | 2020-13 | 1 ES-Center  | 2 | 3 | 2.764706 | #####    |  |  |
| 46 | 2 ES | 2020-13 | 1 ES-Center  | 2 | 4 | 1.95     | #####    |  |  |
| 47 | 2 ES | 2020-13 | 1 ES-Center  | 2 | 5 | 1.714286 | #####    |  |  |
| 48 | 2 ES | 2020-13 | 1 ES-Center  | 3 | 1 | 3.500479 | #####    |  |  |
| 49 | 2 ES | 2020-13 | 1 ES-Center  | 3 | 2 | 7.333333 | 3.538482 |  |  |
| 50 | 2 ES | 2020-13 | 1 ES-Center  | 3 | 3 | 3.375    | 1.576027 |  |  |
| 51 | 2 ES | 2020-13 | 1 ES-Center  | 3 | 4 | 3.3125   | #####    |  |  |
| 52 | 2 ES | 2020-13 | 1 ES-Center  | 3 | 5 | 1.428571 | #####    |  |  |
| 53 | 2 ES | 2020-13 | 1 ES-East    | 1 | 1 | 2.660824 | #####    |  |  |
| 54 | 2 ES | 2020-13 | 1 ES-East    | 1 | 2 | 2.655925 | #####    |  |  |
| 55 | 2 ES | 2020-13 | 1 ES-East    | 1 | 3 | 2.678674 | #####    |  |  |
| 56 | 2 ES | 2020-13 | 1 ES-East    | 1 | 4 | 3.315357 | #####    |  |  |
| 57 | 2 ES | 2020-13 | 1 ES-East    | 1 | 5 | 1.7007   | #####    |  |  |
| 58 | 2 ES | 2020-13 | 1 ES-East    | 2 | 1 | 2.573638 | #####    |  |  |
| 59 | 2 ES | 2020-13 | 1 ES-East    | 2 | 2 | 3.166667 | #####    |  |  |
| 60 | 2 ES | 2020-13 | 1 ES-East    | 2 | 2 | 3.166667 | #####    |  |  |

|    |      |         |              |   |   |          |          |  |
|----|------|---------|--------------|---|---|----------|----------|--|
| 1  |      |         |              |   |   |          |          |  |
| 2  |      |         |              |   |   |          |          |  |
| 3  | 2 ES | 2020-13 | 1 ES-East    | 2 | 3 | 2.693333 | #####    |  |
| 4  | 2 ES | 2020-13 | 1 ES-East    | 2 | 4 | 3.097826 | #####    |  |
| 5  | 2 ES | 2020-13 | 1 ES-East    | 2 | 5 | 1.411765 | #####    |  |
| 6  | 2 ES | 2020-13 | 1 ES-East    | 3 | 1 | 2.744901 | #####    |  |
| 7  | 2 ES | 2020-13 | 1 ES-East    | 3 | 2 | 2.333333 | #####    |  |
| 8  | 2 ES | 2020-13 | 1 ES-East    | 3 | 3 | 2.666667 | #####    |  |
| 9  | 2 ES | 2020-13 | 1 ES-East    | 3 | 4 | 3.575    | #####    |  |
| 10 | 2 ES | 2020-13 | 1 ES-East    | 3 | 5 | 2.034483 | #####    |  |
| 11 | 2 ES | 2020-13 | 1 ES-Island  | 1 | 1 | 3.394003 | #####    |  |
| 12 | 2 ES | 2020-13 | 1 ES-Island  | 1 | 2 | 3.363636 | #####    |  |
| 13 | 2 ES | 2020-13 | 1 ES-Island  | 1 | 3 | 4.753974 | #####    |  |
| 14 | 2 ES | 2020-13 | 1 ES-Island  | 1 | 4 | 2.655621 | #####    |  |
| 15 | 2 ES | 2020-13 | 1 ES-Island  | 1 | 5 | 1.735133 | #####    |  |
| 16 | 2 ES | 2020-13 | 1 ES-Island  | 2 | 1 | 3.496492 | #####    |  |
| 17 | 2 ES | 2020-13 | 1 ES-Island  | 2 | 2 | 3.363636 | #####    |  |
| 18 | 2 ES | 2020-13 | 1 ES-Island  | 2 | 3 | 4.966667 | #####    |  |
| 19 | 2 ES | 2020-13 | 1 ES-Island  | 2 | 4 | 2.269231 | #####    |  |
| 20 | 2 ES | 2020-13 | 1 ES-Island  | 2 | 5 | 1.777778 | #####    |  |
| 21 | 2 ES | 2020-13 | 1 ES-Island  | 3 | 1 | 3.240424 | #####    |  |
| 22 | 2 ES | 2020-13 | 1 ES-Island  | 3 | 3 | 4.428571 | 1.175662 |  |
| 23 | 2 ES | 2020-13 | 1 ES-Island  | 3 | 4 | 3.090909 | 1.007952 |  |
| 24 | 2 ES | 2020-13 | 1 ES-Island  | 3 | 5 | 1.7      | #####    |  |
| 25 | 2 ES | 2020-13 | 1 ES-Madrid  | 1 | 1 | 2.48278  | 0.233272 |  |
| 26 | 2 ES | 2020-13 | 1 ES-Madrid  | 1 | 2 | 2.149639 | #####    |  |
| 27 | 2 ES | 2020-13 | 1 ES-Madrid  | 1 | 3 | 2.249754 | #####    |  |
| 28 | 2 ES | 2020-13 | 1 ES-Madrid  | 1 | 4 | 3.314533 | #####    |  |
| 29 | 2 ES | 2020-13 | 1 ES-Madrid  | 1 | 5 | 2.277829 | #####    |  |
| 30 | 2 ES | 2020-13 | 1 ES-Madrid  | 2 | 1 | 2.594271 | #####    |  |
| 31 | 2 ES | 2020-13 | 1 ES-Madrid  | 2 | 2 | 2.461538 | #####    |  |
| 32 | 2 ES | 2020-13 | 1 ES-Madrid  | 2 | 3 | 2.45283  | #####    |  |
| 33 | 2 ES | 2020-13 | 1 ES-Madrid  | 2 | 4 | 2.904762 | #####    |  |
| 34 | 2 ES | 2020-13 | 1 ES-Madrid  | 2 | 5 | 2.727273 | #####    |  |
| 35 | 2 ES | 2020-13 | 1 ES-Madrid  | 3 | 1 | 2.403158 | #####    |  |
| 36 | 2 ES | 2020-13 | 1 ES-Madrid  | 3 | 2 | 2        | #####    |  |
| 37 | 2 ES | 2020-13 | 1 ES-Madrid  | 3 | 3 | 2.055556 | #####    |  |
| 38 | 2 ES | 2020-13 | 1 ES-Madrid  | 3 | 4 | 3.5      | #####    |  |
| 39 | 2 ES | 2020-13 | 1 ES-Madrid  | 3 | 5 | 1.7      | #####    |  |
| 40 | 2 ES | 2020-13 | 1 ES-Northea | 1 | 1 | 2.956722 | #####    |  |
| 41 | 2 ES | 2020-13 | 1 ES-Northea | 1 | 2 | 5.70333  | 2.188371 |  |
| 42 | 2 ES | 2020-13 | 1 ES-Northea | 1 | 3 | 2.858567 | #####    |  |
| 43 | 2 ES | 2020-13 | 1 ES-Northea | 1 | 4 | 2.89711  | #####    |  |
| 44 | 2 ES | 2020-13 | 1 ES-Northea | 1 | 5 | 1.763634 | #####    |  |
| 45 | 2 ES | 2020-13 | 1 ES-Northea | 2 | 1 | 2.910214 | #####    |  |
| 46 | 2 ES | 2020-13 | 1 ES-Northea | 2 | 2 | 5.375    | 2.423663 |  |
| 47 | 2 ES | 2020-13 | 1 ES-Northea | 2 | 3 | 2.205128 | #####    |  |
| 48 | 2 ES | 2020-13 | 1 ES-Northea | 2 | 4 | 3.208333 | #####    |  |
| 49 | 2 ES | 2020-13 | 1 ES-Northea | 2 | 5 | 2.125    | #####    |  |
| 50 | 2 ES | 2020-13 | 1 ES-Northea | 3 | 1 | 3.006716 | #####    |  |
| 51 | 2 ES | 2020-13 | 1 ES-Northea | 3 | 2 | 6        | 3.535864 |  |
| 52 | 2 ES | 2020-13 | 1 ES-Northea | 3 | 3 | 3.3125   | 1.124128 |  |
| 53 | 2 ES | 2020-13 | 1 ES-Northea | 3 | 4 | 2.352941 | #####    |  |
| 54 | 2 ES | 2020-13 | 1 ES-Northea | 3 | 5 | 1.333333 | #####    |  |
| 55 | 2 ES | 2020-13 | 1 ES-Northw  | 1 | 1 | 2.97862  | #####    |  |
| 56 | 2 ES | 2020-13 | 1 ES-Northw  | 1 | 2 | 4.335324 | #####    |  |
| 57 | 2 ES | 2020-13 | 1 ES-Northw  | 1 | 3 | 3.27532  | #####    |  |
| 58 | 2 ES | 2020-13 | 1 ES-Northw  | 1 | 4 | 2.797861 | #####    |  |
| 59 | 2 ES | 2020-13 | 1 ES-Northw  | 1 |   |          |          |  |
| 60 | 2 ES | 2020-13 | 1 ES-Northw  | 1 |   |          |          |  |

|    |      |         |              |   |   |          |          |  |
|----|------|---------|--------------|---|---|----------|----------|--|
| 1  |      |         |              |   |   |          |          |  |
| 2  |      |         |              |   |   |          |          |  |
| 3  | 2 ES | 2020-13 | 1 ES-Northw  | 1 | 5 | 2.140095 | #####    |  |
| 4  | 2 ES | 2020-13 | 1 ES-Northw  | 2 | 1 | 2.790311 | #####    |  |
| 5  | 2 ES | 2020-13 | 1 ES-Northw  | 2 | 2 | 2.454545 | #####    |  |
| 6  | 2 ES | 2020-13 | 1 ES-Northw  | 2 | 3 | 3.258065 | #####    |  |
| 7  | 2 ES | 2020-13 | 1 ES-Northw  | 2 | 4 | 3.540541 | #####    |  |
| 8  | 2 ES | 2020-13 | 1 ES-Northw  | 2 | 5 | 1.727273 | #####    |  |
| 9  | 2 ES | 2020-13 | 1 ES-Northw  | 3 | 1 | 3.174845 | #####    |  |
| 10 | 2 ES | 2020-13 | 1 ES-Northw  | 3 | 2 | 6        | 1.414346 |  |
| 11 | 2 ES | 2020-13 | 1 ES-Northw  | 3 | 3 | 3.294118 | #####    |  |
| 12 | 2 ES | 2020-13 | 1 ES-Northw  | 3 | 4 | 2.25     | #####    |  |
| 13 | 2 ES | 2020-13 | 1 ES-Northw  | 3 | 5 | 2.8      | #####    |  |
| 14 | 2 ES | 2020-13 | 1 ES-Overall | 1 | 1 | 2.762913 | #####    |  |
| 15 | 2 ES | 2020-13 | 1 ES-Overall | 1 | 2 | 3.551389 | #####    |  |
| 16 | 2 ES | 2020-13 | 1 ES-Overall | 1 | 3 | 2.785394 | #####    |  |
| 17 | 2 ES | 2020-13 | 1 ES-Overall | 1 | 4 | 3.004762 | #####    |  |
| 18 | 2 ES | 2020-13 | 1 ES-Overall | 1 | 5 | 1.833316 | #####    |  |
| 19 | 2 ES | 2020-13 | 1 ES-Overall | 2 | 1 | 2.671287 | #####    |  |
| 20 | 2 ES | 2020-13 | 1 ES-Overall | 2 | 2 | 2.958203 | #####    |  |
| 21 | 2 ES | 2020-13 | 1 ES-Overall | 2 | 3 | 2.965603 | #####    |  |
| 22 | 2 ES | 2020-13 | 1 ES-Overall | 2 | 4 | 2.85789  | #####    |  |
| 23 | 2 ES | 2020-13 | 1 ES-Overall | 2 | 5 | 1.824015 | #####    |  |
| 24 | 2 ES | 2020-13 | 1 ES-Overall | 3 | 1 | 2.85076  | #####    |  |
| 25 | 2 ES | 2020-13 | 1 ES-Overall | 3 | 2 | 4.047797 | #####    |  |
| 26 | 2 ES | 2020-13 | 1 ES-Overall | 3 | 3 | 2.618756 | #####    |  |
| 27 | 2 ES | 2020-13 | 1 ES-Overall | 3 | 4 | 3.144256 | #####    |  |
| 28 | 2 ES | 2020-13 | 1 ES-Overall | 3 | 5 | 1.843838 | #####    |  |
| 29 | 2 ES | 2020-13 | 1 ES-South   | 1 | 1 | 2.675009 | #####    |  |
| 30 | 2 ES | 2020-13 | 1 ES-South   | 1 | 2 | 4.210528 | #####    |  |
| 31 | 2 ES | 2020-13 | 1 ES-South   | 1 | 3 | 2.237863 | #####    |  |
| 32 | 2 ES | 2020-13 | 1 ES-South   | 1 | 4 | 2.852327 | #####    |  |
| 33 | 2 ES | 2020-13 | 1 ES-South   | 1 | 5 | 1.861637 | #####    |  |
| 34 | 2 ES | 2020-13 | 1 ES-South   | 2 | 1 | 2.647623 | #####    |  |
| 35 | 2 ES | 2020-13 | 1 ES-South   | 2 | 2 | 2.384615 | #####    |  |
| 36 | 2 ES | 2020-13 | 1 ES-South   | 2 | 3 | 3.212766 | #####    |  |
| 37 | 2 ES | 2020-13 | 1 ES-South   | 2 | 4 | 2.627451 | #####    |  |
| 38 | 2 ES | 2020-13 | 1 ES-South   | 2 | 5 | 2.071429 | #####    |  |
| 39 | 2 ES | 2020-13 | 1 ES-South   | 3 | 1 | 2.697201 | #####    |  |
| 40 | 2 ES | 2020-13 | 1 ES-South   | 3 | 2 | 6.333333 | 1.360955 |  |
| 41 | 2 ES | 2020-13 | 1 ES-South   | 3 | 3 | 1.533333 | #####    |  |
| 42 | 2 ES | 2020-13 | 1 ES-South   | 3 | 4 | 3.028571 | #####    |  |
| 43 | 2 ES | 2020-13 | 1 ES-South   | 3 | 5 | 1.7      | #####    |  |
| 44 | 2 ES | 2020-13 | 2 ES-Center  | 1 | 1 | 1.641865 | #####    |  |
| 45 | 2 ES | 2020-13 | 2 ES-Center  | 1 | 2 | 2.405334 | #####    |  |
| 46 | 2 ES | 2020-13 | 2 ES-Center  | 1 | 3 | 1.688654 | #####    |  |
| 47 | 2 ES | 2020-13 | 2 ES-Center  | 1 | 4 | 1.37027  | #####    |  |
| 48 | 2 ES | 2020-13 | 2 ES-Center  | 1 | 5 | 1.482502 | #####    |  |
| 49 | 2 ES | 2020-13 | 2 ES-Center  | 2 | 1 | 1.709487 | #####    |  |
| 50 | 2 ES | 2020-13 | 2 ES-Center  | 2 | 2 | 2.272727 | #####    |  |
| 51 | 2 ES | 2020-13 | 2 ES-Center  | 2 | 3 | 1.88     | #####    |  |
| 52 | 2 ES | 2020-13 | 2 ES-Center  | 2 | 4 | 1.219512 | #####    |  |
| 53 | 2 ES | 2020-13 | 2 ES-Center  | 2 | 5 | 1.714286 | #####    |  |
| 54 | 2 ES | 2020-13 | 2 ES-Center  | 3 | 1 | 1.56221  | #####    |  |
| 55 | 2 ES | 2020-13 | 2 ES-Center  | 3 | 2 | 2.5      | #####    |  |
| 56 | 2 ES | 2020-13 | 2 ES-Center  | 3 | 3 | 1.375    | #####    |  |
| 57 | 2 ES | 2020-13 | 2 ES-Center  | 3 | 4 | 1.5      | #####    |  |
| 58 | 2 ES | 2020-13 | 2 ES-Center  | 3 | 5 | 1.142857 | #####    |  |
| 59 | 2 ES | 2020-13 | 2 ES-Center  | 3 |   |          |          |  |
| 60 | 2 ES | 2020-13 | 2 ES-Center  | 3 |   |          |          |  |

|    |      |         |              |   |   |          |       |   |
|----|------|---------|--------------|---|---|----------|-------|---|
| 1  |      |         |              |   |   |          |       |   |
| 2  |      |         |              |   |   |          |       |   |
| 3  | 2 ES | 2020-13 | 2 ES-East    | 1 | 1 | 1.462325 | ##### |   |
| 4  | 2 ES | 2020-13 | 2 ES-East    | 1 | 2 | 2.076598 | ##### |   |
| 5  | 2 ES | 2020-13 | 2 ES-East    | 1 | 3 | 1.441615 | ##### |   |
| 6  | 2 ES | 2020-13 | 2 ES-East    | 1 | 4 | 1.528551 | ##### |   |
| 7  | 2 ES | 2020-13 | 2 ES-East    | 1 | 5 | #####    | ##### |   |
| 8  | 2 ES | 2020-13 | 2 ES-East    | 2 | 1 | 1.465108 | ##### |   |
| 9  | 2 ES | 2020-13 | 2 ES-East    | 2 | 2 | 2.176471 | ##### |   |
| 10 | 2 ES | 2020-13 | 2 ES-East    | 2 | 3 | 1.74026  | ##### |   |
| 11 | 2 ES | 2020-13 | 2 ES-East    | 2 | 4 | 1.42268  | ##### |   |
| 12 | 2 ES | 2020-13 | 2 ES-East    | 2 | 5 | #####    | ##### |   |
| 13 | 2 ES | 2020-13 | 2 ES-East    | 3 | 1 | 1.459547 | ##### |   |
| 14 | 2 ES | 2020-13 | 2 ES-East    | 3 | 2 | 2        | ##### |   |
| 15 | 2 ES | 2020-13 | 2 ES-East    | 3 | 3 | 1.190476 | ##### |   |
| 16 | 2 ES | 2020-13 | 2 ES-East    | 3 | 4 | 1.658537 | ##### |   |
| 17 | 2 ES | 2020-13 | 2 ES-East    | 3 | 5 | 1.166667 | ##### |   |
| 18 | 2 ES | 2020-13 | 2 ES-East    | 3 | 5 | 1.166667 | ##### |   |
| 19 | 2 ES | 2020-13 | 2 ES-Island  | 1 | 1 | 1.909605 | ##### |   |
| 20 | 2 ES | 2020-13 | 2 ES-Island  | 1 | 2 | 2        | ##### |   |
| 21 | 2 ES | 2020-13 | 2 ES-Island  | 1 | 3 | 2.363648 | ##### |   |
| 22 | 2 ES | 2020-13 | 2 ES-Island  | 1 | 4 | 1.584364 | ##### |   |
| 23 | 2 ES | 2020-13 | 2 ES-Island  | 1 | 5 | 1.420076 | ##### |   |
| 24 | 2 ES | 2020-13 | 2 ES-Island  | 2 | 1 | 1.983827 | ##### |   |
| 25 | 2 ES | 2020-13 | 2 ES-Island  | 2 | 2 | 2        | ##### |   |
| 26 | 2 ES | 2020-13 | 2 ES-Island  | 2 | 3 | 2.322581 | ##### |   |
| 27 | 2 ES | 2020-13 | 2 ES-Island  | 2 | 4 | 1.740741 | ##### |   |
| 28 | 2 ES | 2020-13 | 2 ES-Island  | 2 | 5 | 1.444444 | ##### |   |
| 29 | 2 ES | 2020-13 | 2 ES-Island  | 3 | 1 | 1.799175 | ##### |   |
| 30 | 2 ES | 2020-13 | 2 ES-Island  | 3 | 3 | 2.428571 | ##### |   |
| 31 | 2 ES | 2020-13 | 2 ES-Island  | 3 | 4 | 1.416667 | ##### |   |
| 32 | 2 ES | 2020-13 | 2 ES-Island  | 3 | 5 | 1.4      | ##### |   |
| 33 | 2 ES | 2020-13 | 2 ES-Madrid  | 1 | 1 | 1.641974 | ##### |   |
| 34 | 2 ES | 2020-13 | 2 ES-Madrid  | 1 | 2 | 1.685245 | ##### |   |
| 35 | 2 ES | 2020-13 | 2 ES-Madrid  | 1 | 3 | 1.649799 | ##### |   |
| 36 | 2 ES | 2020-13 | 2 ES-Madrid  | 1 | 4 | 1.882399 | ##### |   |
| 37 | 2 ES | 2020-13 | 2 ES-Madrid  | 1 | 5 | 1.16079  | ##### |   |
| 38 | 2 ES | 2020-13 | 2 ES-Madrid  | 2 | 1 | 1.789664 | ##### |   |
| 39 | 2 ES | 2020-13 | 2 ES-Madrid  | 2 | 2 | 2.285714 | ##### |   |
| 40 | 2 ES | 2020-13 | 2 ES-Madrid  | 2 | 3 | 1.703704 | ##### |   |
| 41 | 2 ES | 2020-13 | 2 ES-Madrid  | 2 | 4 | 1.909091 | ##### |   |
| 42 | 2 ES | 2020-13 | 2 ES-Madrid  | 2 | 5 | 1.363636 | ##### |   |
| 43 | 2 ES | 2020-13 | 2 ES-Madrid  | 3 | 1 | 1.544413 | ##### |   |
| 44 | 2 ES | 2020-13 | 2 ES-Madrid  | 3 | 2 | 1.375    | ##### |   |
| 45 | 2 ES | 2020-13 | 2 ES-Madrid  | 3 | 3 | 1.608696 | ##### |   |
| 46 | 2 ES | 2020-13 | 2 ES-Madrid  | 3 | 4 | 1.870968 | ##### |   |
| 47 | 2 ES | 2020-13 | 2 ES-Madrid  | 3 | 5 | 0.9      | ##### |   |
| 48 | 2 ES | 2020-13 | 2 ES-Northea | 1 | 1 | 1.554419 | ##### |   |
| 49 | 2 ES | 2020-13 | 2 ES-Northea | 1 | 2 | 1.534006 | ##### |   |
| 50 | 2 ES | 2020-13 | 2 ES-Northea | 1 | 3 | 1.536589 | ##### |   |
| 51 | 2 ES | 2020-13 | 2 ES-Northea | 1 | 4 | 1.761668 | ##### |   |
| 52 | 2 ES | 2020-13 | 2 ES-Northea | 1 | 5 | 1.305263 | ##### |   |
| 53 | 2 ES | 2020-13 | 2 ES-Northea | 2 | 1 | 1.743433 | ##### |   |
| 54 | 2 ES | 2020-13 | 2 ES-Northea | 2 | 2 | 2.125    | ##### |   |
| 55 | 2 ES | 2020-13 | 2 ES-Northea | 2 | 3 | 1.880952 | ##### |   |
| 56 | 2 ES | 2020-13 | 2 ES-Northea | 2 | 4 | 1.76     | ##### |   |
| 57 | 2 ES | 2020-13 | 2 ES-Northea | 2 | 5 | 1.375    | ##### |   |
| 58 | 2 ES | 2020-13 | 2 ES-Northea | 3 | 1 | 1.349174 | ##### |   |
| 59 | 2 ES | 2020-13 | 2 ES-Northea | 3 | 2 | 1        | ##### | 0 |
| 60 | 2 ES | 2020-13 | 2 ES-Northea | 3 | 2 | 1        | ##### | 0 |

|    |      |         |              |   |   |          |       |  |  |
|----|------|---------|--------------|---|---|----------|-------|--|--|
| 1  |      |         |              |   |   |          |       |  |  |
| 2  |      |         |              |   |   |          |       |  |  |
| 3  | 2 ES | 2020-13 | 2 ES-Northea | 3 | 3 | 1.294118 | ##### |  |  |
| 4  | 2 ES | 2020-13 | 2 ES-Northea | 3 | 4 | 1.764706 | ##### |  |  |
| 5  | 2 ES | 2020-13 | 2 ES-Northea | 3 | 5 | 1.222222 | ##### |  |  |
| 6  | 2 ES | 2020-13 | 2 ES-Northw  | 1 | 1 | 1.513483 | ##### |  |  |
| 7  | 2 ES | 2020-13 | 2 ES-Northw  | 1 | 2 | 2.320002 | ##### |  |  |
| 8  | 2 ES | 2020-13 | 2 ES-Northw  | 1 | 3 | 1.558485 | ##### |  |  |
| 9  | 2 ES | 2020-13 | 2 ES-Northw  | 1 | 4 | 1.325771 | ##### |  |  |
| 10 | 2 ES | 2020-13 | 2 ES-Northw  | 1 | 5 | 1.21346  | ##### |  |  |
| 11 | 2 ES | 2020-13 | 2 ES-Northw  | 2 | 1 | 1.401869 | ##### |  |  |
| 12 | 2 ES | 2020-13 | 2 ES-Northw  | 2 | 2 | 2.416667 | ##### |  |  |
| 13 | 2 ES | 2020-13 | 2 ES-Northw  | 2 | 3 | 1.538462 | ##### |  |  |
| 14 | 2 ES | 2020-13 | 2 ES-Northw  | 2 | 4 | 1.315789 | ##### |  |  |
| 15 | 2 ES | 2020-13 | 2 ES-Northw  | 2 | 5 | #####    | ##### |  |  |
| 16 | 2 ES | 2020-13 | 2 ES-Northw  | 3 | 1 | 1.624632 | ##### |  |  |
| 17 | 2 ES | 2020-13 | 2 ES-Northw  | 3 | 2 | 2.25     | ##### |  |  |
| 18 | 2 ES | 2020-13 | 2 ES-Northw  | 3 | 3 | 1.578947 | ##### |  |  |
| 19 | 2 ES | 2020-13 | 2 ES-Northw  | 3 | 4 | 1.333333 | ##### |  |  |
| 20 | 2 ES | 2020-13 | 2 ES-Northw  | 3 | 5 | 1.7      | ##### |  |  |
| 21 | 2 ES | 2020-13 | 2 ES-Overall | 1 | 1 | 1.601619 | ##### |  |  |
| 22 | 2 ES | 2020-13 | 2 ES-Overall | 1 | 2 | 2.089679 | ##### |  |  |
| 23 | 2 ES | 2020-13 | 2 ES-Overall | 1 | 3 | 1.636628 | ##### |  |  |
| 24 | 2 ES | 2020-13 | 2 ES-Overall | 1 | 4 | 1.621556 | ##### |  |  |
| 25 | 2 ES | 2020-13 | 2 ES-Overall | 1 | 5 | 1.147534 | ##### |  |  |
| 26 | 2 ES | 2020-13 | 2 ES-Overall | 2 | 1 | 1.652233 | ##### |  |  |
| 27 | 2 ES | 2020-13 | 2 ES-Overall | 2 | 2 | 2.214847 | ##### |  |  |
| 28 | 2 ES | 2020-13 | 2 ES-Overall | 2 | 3 | 1.83917  | ##### |  |  |
| 29 | 2 ES | 2020-13 | 2 ES-Overall | 2 | 4 | 1.53616  | ##### |  |  |
| 30 | 2 ES | 2020-13 | 2 ES-Overall | 2 | 5 | 1.160955 | ##### |  |  |
| 31 | 2 ES | 2020-13 | 2 ES-Overall | 3 | 1 | 1.553166 | ##### |  |  |
| 32 | 2 ES | 2020-13 | 2 ES-Overall | 3 | 2 | 1.983337 | ##### |  |  |
| 33 | 2 ES | 2020-13 | 2 ES-Overall | 3 | 3 | 1.448745 | ##### |  |  |
| 34 | 2 ES | 2020-13 | 2 ES-Overall | 3 | 4 | 1.702021 | ##### |  |  |
| 35 | 2 ES | 2020-13 | 2 ES-Overall | 3 | 5 | 1.132377 | ##### |  |  |
| 36 | 2 ES | 2020-13 | 2 ES-South   | 1 | 1 | 1.738532 | ##### |  |  |
| 37 | 2 ES | 2020-13 | 2 ES-South   | 1 | 2 | 2.432331 | ##### |  |  |
| 38 | 2 ES | 2020-13 | 2 ES-South   | 1 | 3 | 1.73844  | ##### |  |  |
| 39 | 2 ES | 2020-13 | 2 ES-South   | 1 | 4 | 1.834204 | ##### |  |  |
| 40 | 2 ES | 2020-13 | 2 ES-South   | 1 | 5 | 1.066738 | ##### |  |  |
| 41 | 2 ES | 2020-13 | 2 ES-South   | 2 | 1 | 1.812169 | ##### |  |  |
| 42 | 2 ES | 2020-13 | 2 ES-South   | 2 | 2 | 2.230769 | ##### |  |  |
| 43 | 2 ES | 2020-13 | 2 ES-South   | 2 | 3 | 2        | ##### |  |  |
| 44 | 2 ES | 2020-13 | 2 ES-South   | 2 | 4 | 1.692308 | ##### |  |  |
| 45 | 2 ES | 2020-13 | 2 ES-South   | 2 | 5 | 1.333333 | ##### |  |  |
| 46 | 2 ES | 2020-13 | 2 ES-South   | 3 | 1 | 1.677373 | ##### |  |  |
| 47 | 2 ES | 2020-13 | 2 ES-South   | 3 | 2 | 2.666667 | ##### |  |  |
| 48 | 2 ES | 2020-13 | 2 ES-South   | 3 | 3 | 1.533333 | ##### |  |  |
| 49 | 2 ES | 2020-13 | 2 ES-South   | 3 | 4 | 1.944444 | ##### |  |  |
| 50 | 2 ES | 2020-13 | 2 ES-South   | 3 | 5 | #####    | ##### |  |  |
| 51 | 2 ES | 2020-13 | 3 ES-Center  | 1 | 1 | 0        | 0     |  |  |
| 52 | 2 ES | 2020-13 | 3 ES-Center  | 1 | 2 | 0        | 0     |  |  |
| 53 | 2 ES | 2020-13 | 3 ES-Center  | 1 | 3 | 0        | 0     |  |  |
| 54 | 2 ES | 2020-13 | 3 ES-Center  | 1 | 4 | 0        | 0     |  |  |
| 55 | 2 ES | 2020-13 | 3 ES-Center  | 1 | 5 | 0        | 0     |  |  |
| 56 | 2 ES | 2020-13 | 3 ES-Center  | 2 | 1 | 0        | 0     |  |  |
| 57 | 2 ES | 2020-13 | 3 ES-Center  | 2 | 2 | 0        | 0     |  |  |
| 58 | 2 ES | 2020-13 | 3 ES-Center  | 2 | 3 | 0        | 0     |  |  |
| 59 | 2 ES | 2020-13 | 3 ES-Center  | 2 | 3 | 0        | 0     |  |  |
| 60 | 2 ES | 2020-13 | 3 ES-Center  | 2 | 3 | 0        | 0     |  |  |



|    |      |         |             |   |   |   |   |
|----|------|---------|-------------|---|---|---|---|
| 1  |      |         |             |   |   |   |   |
| 2  |      |         |             |   |   |   |   |
| 3  | 2 ES | 2020-13 | 3 ES-Center | 2 | 4 | 0 | 0 |
| 4  | 2 ES | 2020-13 | 3 ES-Center | 2 | 5 | 0 | 0 |
| 5  | 2 ES | 2020-13 | 3 ES-Center | 3 | 1 | 0 | 0 |
| 6  | 2 ES | 2020-13 | 3 ES-Center | 3 | 2 | 0 | 0 |
| 7  | 2 ES | 2020-13 | 3 ES-Center | 3 | 3 | 0 | 0 |
| 8  | 2 ES | 2020-13 | 3 ES-Center | 3 | 4 | 0 | 0 |
| 9  | 2 ES | 2020-13 | 3 ES-Center | 3 | 5 | 0 | 0 |
| 10 | 2 ES | 2020-13 | 3 ES-East   | 1 | 1 | 0 | 0 |
| 11 | 2 ES | 2020-13 | 3 ES-East   | 1 | 2 | 0 | 0 |
| 12 | 2 ES | 2020-13 | 3 ES-East   | 1 | 3 | 0 | 0 |
| 13 | 2 ES | 2020-13 | 3 ES-East   | 1 | 4 | 0 | 0 |
| 14 | 2 ES | 2020-13 | 3 ES-East   | 1 | 5 | 0 | 0 |
| 15 | 2 ES | 2020-13 | 3 ES-East   | 2 | 1 | 0 | 0 |
| 16 | 2 ES | 2020-13 | 3 ES-East   | 2 | 2 | 0 | 0 |
| 17 | 2 ES | 2020-13 | 3 ES-East   | 2 | 3 | 0 | 0 |
| 18 | 2 ES | 2020-13 | 3 ES-East   | 2 | 4 | 0 | 0 |
| 19 | 2 ES | 2020-13 | 3 ES-East   | 2 | 5 | 0 | 0 |
| 20 | 2 ES | 2020-13 | 3 ES-East   | 3 | 1 | 0 | 0 |
| 21 | 2 ES | 2020-13 | 3 ES-East   | 3 | 2 | 0 | 0 |
| 22 | 2 ES | 2020-13 | 3 ES-East   | 3 | 3 | 0 | 0 |
| 23 | 2 ES | 2020-13 | 3 ES-East   | 3 | 4 | 0 | 0 |
| 24 | 2 ES | 2020-13 | 3 ES-East   | 3 | 5 | 0 | 0 |
| 25 | 2 ES | 2020-13 | 3 ES-East   | 3 | 5 | 0 | 0 |
| 26 | 2 ES | 2020-13 | 3 ES-Island | 1 | 1 | 0 | 0 |
| 27 | 2 ES | 2020-13 | 3 ES-Island | 1 | 2 | 0 | 0 |
| 28 | 2 ES | 2020-13 | 3 ES-Island | 1 | 3 | 0 | 0 |
| 29 | 2 ES | 2020-13 | 3 ES-Island | 1 | 4 | 0 | 0 |
| 30 | 2 ES | 2020-13 | 3 ES-Island | 1 | 5 | 0 | 0 |
| 31 | 2 ES | 2020-13 | 3 ES-Island | 2 | 1 | 0 | 0 |
| 32 | 2 ES | 2020-13 | 3 ES-Island | 2 | 2 | 0 | 0 |
| 33 | 2 ES | 2020-13 | 3 ES-Island | 2 | 3 | 0 | 0 |
| 34 | 2 ES | 2020-13 | 3 ES-Island | 2 | 4 | 0 | 0 |
| 35 | 2 ES | 2020-13 | 3 ES-Island | 2 | 5 | 0 | 0 |
| 36 | 2 ES | 2020-13 | 3 ES-Island | 3 | 1 | 0 | 0 |
| 37 | 2 ES | 2020-13 | 3 ES-Island | 3 | 3 | 0 | 0 |
| 38 | 2 ES | 2020-13 | 3 ES-Island | 3 | 4 | 0 | 0 |
| 39 | 2 ES | 2020-13 | 3 ES-Island | 3 | 5 | 0 | 0 |
| 40 | 2 ES | 2020-13 | 3 ES-Madrid | 1 | 1 | 0 | 0 |
| 41 | 2 ES | 2020-13 | 3 ES-Madrid | 1 | 2 | 0 | 0 |
| 42 | 2 ES | 2020-13 | 3 ES-Madrid | 1 | 3 | 0 | 0 |
| 43 | 2 ES | 2020-13 | 3 ES-Madrid | 1 | 4 | 0 | 0 |
| 44 | 2 ES | 2020-13 | 3 ES-Madrid | 1 | 5 | 0 | 0 |
| 45 | 2 ES | 2020-13 | 3 ES-Madrid | 2 | 1 | 0 | 0 |
| 46 | 2 ES | 2020-13 | 3 ES-Madrid | 2 | 2 | 0 | 0 |
| 47 | 2 ES | 2020-13 | 3 ES-Madrid | 2 | 3 | 0 | 0 |
| 48 | 2 ES | 2020-13 | 3 ES-Madrid | 2 | 4 | 0 | 0 |
| 49 | 2 ES | 2020-13 | 3 ES-Madrid | 2 | 5 | 0 | 0 |
| 50 | 2 ES | 2020-13 | 3 ES-Madrid | 3 | 1 | 0 | 0 |
| 51 | 2 ES | 2020-13 | 3 ES-Madrid | 3 | 2 | 0 | 0 |
| 52 | 2 ES | 2020-13 | 3 ES-Madrid | 3 | 3 | 0 | 0 |
| 53 | 2 ES | 2020-13 | 3 ES-Madrid | 3 | 4 | 0 | 0 |
| 54 | 2 ES | 2020-13 | 3 ES-Madrid | 3 | 5 | 0 | 0 |
| 55 | 2 ES | 2020-13 | 3 ES-Northe | 1 | 1 | 0 | 0 |
| 56 | 2 ES | 2020-13 | 3 ES-Northe | 1 | 2 | 0 | 0 |
| 57 | 2 ES | 2020-13 | 3 ES-Northe | 1 | 3 | 0 | 0 |
| 58 | 2 ES | 2020-13 | 3 ES-Northe | 1 | 4 | 0 | 0 |
| 59 | 2 ES | 2020-13 | 3 ES-Northe | 1 | 5 | 0 | 0 |
| 60 | 2 ES | 2020-13 | 3 ES-Northe | 1 | 5 | 0 | 0 |

|    |      |         |              |   |   |       |       |
|----|------|---------|--------------|---|---|-------|-------|
| 1  |      |         |              |   |   |       |       |
| 2  |      |         |              |   |   |       |       |
| 3  | 2 ES | 2020-13 | 3 ES-Northea | 2 | 1 | 0     | 0     |
| 4  | 2 ES | 2020-13 | 3 ES-Northea | 2 | 2 | 0     | 0     |
| 5  | 2 ES | 2020-13 | 3 ES-Northea | 2 | 3 | 0     | 0     |
| 6  | 2 ES | 2020-13 | 3 ES-Northea | 2 | 4 | 0     | 0     |
| 7  | 2 ES | 2020-13 | 3 ES-Northea | 2 | 5 | 0     | 0     |
| 8  | 2 ES | 2020-13 | 3 ES-Northea | 3 | 1 | 0     | 0     |
| 9  | 2 ES | 2020-13 | 3 ES-Northea | 3 | 2 | 0     | 0     |
| 10 | 2 ES | 2020-13 | 3 ES-Northea | 3 | 3 | 0     | 0     |
| 11 | 2 ES | 2020-13 | 3 ES-Northea | 3 | 4 | 0     | 0     |
| 12 | 2 ES | 2020-13 | 3 ES-Northea | 3 | 5 | 0     | 0     |
| 13 | 2 ES | 2020-13 | 3 ES-Northw  | 1 | 1 | 0     | 0     |
| 14 | 2 ES | 2020-13 | 3 ES-Northw  | 1 | 2 | 0     | 0     |
| 15 | 2 ES | 2020-13 | 3 ES-Northw  | 1 | 3 | 0     | 0     |
| 16 | 2 ES | 2020-13 | 3 ES-Northw  | 1 | 4 | 0     | 0     |
| 17 | 2 ES | 2020-13 | 3 ES-Northw  | 1 | 5 | 0     | 0     |
| 18 | 2 ES | 2020-13 | 3 ES-Northw  | 2 | 1 | 0     | 0     |
| 19 | 2 ES | 2020-13 | 3 ES-Northw  | 2 | 2 | 0     | 0     |
| 20 | 2 ES | 2020-13 | 3 ES-Northw  | 2 | 3 | 0     | 0     |
| 21 | 2 ES | 2020-13 | 3 ES-Northw  | 2 | 4 | 0     | 0     |
| 22 | 2 ES | 2020-13 | 3 ES-Northw  | 2 | 5 | 0     | 0     |
| 23 | 2 ES | 2020-13 | 3 ES-Northw  | 3 | 1 | 0     | 0     |
| 24 | 2 ES | 2020-13 | 3 ES-Northw  | 3 | 2 | 0     | 0     |
| 25 | 2 ES | 2020-13 | 3 ES-Northw  | 3 | 3 | 0     | 0     |
| 26 | 2 ES | 2020-13 | 3 ES-Northw  | 3 | 4 | 0     | 0     |
| 27 | 2 ES | 2020-13 | 3 ES-Northw  | 3 | 5 | 0     | 0     |
| 28 | 2 ES | 2020-13 | 3 ES-Overall | 1 | 1 | 0     | 0     |
| 29 | 2 ES | 2020-13 | 3 ES-Overall | 1 | 2 | 0     | 0     |
| 30 | 2 ES | 2020-13 | 3 ES-Overall | 1 | 3 | 0     | 0     |
| 31 | 2 ES | 2020-13 | 3 ES-Overall | 1 | 4 | 0     | 0     |
| 32 | 2 ES | 2020-13 | 3 ES-Overall | 1 | 5 | 0     | 0     |
| 33 | 2 ES | 2020-13 | 3 ES-Overall | 2 | 1 | 0     | 0     |
| 34 | 2 ES | 2020-13 | 3 ES-Overall | 2 | 2 | 0     | 0     |
| 35 | 2 ES | 2020-13 | 3 ES-Overall | 2 | 3 | 0     | 0     |
| 36 | 2 ES | 2020-13 | 3 ES-Overall | 2 | 4 | 0     | 0     |
| 37 | 2 ES | 2020-13 | 3 ES-Overall | 2 | 5 | 0     | 0     |
| 38 | 2 ES | 2020-13 | 3 ES-Overall | 3 | 1 | 0     | 0     |
| 39 | 2 ES | 2020-13 | 3 ES-Overall | 3 | 2 | 0     | 0     |
| 40 | 2 ES | 2020-13 | 3 ES-Overall | 3 | 3 | 0     | 0     |
| 41 | 2 ES | 2020-13 | 3 ES-Overall | 3 | 4 | 0     | 0     |
| 42 | 2 ES | 2020-13 | 3 ES-Overall | 3 | 5 | 0     | 0     |
| 43 | 2 ES | 2020-13 | 3 ES-South   | 1 | 1 | 0     | 0     |
| 44 | 2 ES | 2020-13 | 3 ES-South   | 1 | 2 | 0     | 0     |
| 45 | 2 ES | 2020-13 | 3 ES-South   | 1 | 3 | 0     | 0     |
| 46 | 2 ES | 2020-13 | 3 ES-South   | 1 | 4 | 0     | 0     |
| 47 | 2 ES | 2020-13 | 3 ES-South   | 1 | 5 | 0     | 0     |
| 48 | 2 ES | 2020-13 | 3 ES-South   | 2 | 1 | 0     | 0     |
| 49 | 2 ES | 2020-13 | 3 ES-South   | 2 | 2 | 0     | 0     |
| 50 | 2 ES | 2020-13 | 3 ES-South   | 2 | 3 | 0     | 0     |
| 51 | 2 ES | 2020-13 | 3 ES-South   | 2 | 4 | 0     | 0     |
| 52 | 2 ES | 2020-13 | 3 ES-South   | 2 | 5 | 0     | 0     |
| 53 | 2 ES | 2020-13 | 3 ES-South   | 3 | 1 | 0     | 0     |
| 54 | 2 ES | 2020-13 | 3 ES-South   | 3 | 2 | 0     | 0     |
| 55 | 2 ES | 2020-13 | 3 ES-South   | 3 | 3 | 0     | 0     |
| 56 | 2 ES | 2020-13 | 3 ES-South   | 3 | 4 | 0     | 0     |
| 57 | 2 ES | 2020-13 | 3 ES-South   | 3 | 5 | 0     | 0     |
| 58 | 2 ES | 2020-13 | 4 ES-Center  | 1 | 1 | ##### | ##### |
| 59 |      |         |              |   |   |       |       |
| 60 |      |         |              |   |   |       |       |

|    |      |         |             |   |   |          |          |
|----|------|---------|-------------|---|---|----------|----------|
| 1  |      |         |             |   |   |          |          |
| 2  |      |         |             |   |   |          |          |
| 3  | 2 ES | 2020-13 | 4 ES-Center | 1 | 2 | 2.049342 | 1.795605 |
| 4  | 2 ES | 2020-13 | 4 ES-Center | 1 | 3 | 1.080302 | #####    |
| 5  | 2 ES | 2020-13 | 4 ES-Center | 1 | 4 | #####    | #####    |
| 6  | 2 ES | 2020-13 | 4 ES-Center | 1 | 5 | 0        | 0        |
| 7  | 2 ES | 2020-13 | 4 ES-Center | 2 | 1 | #####    | #####    |
| 8  | 2 ES | 2020-13 | 4 ES-Center | 2 | 2 | 0        | 0        |
| 9  | 2 ES | 2020-13 | 4 ES-Center | 2 | 3 | #####    | #####    |
| 10 | 2 ES | 2020-13 | 4 ES-Center | 2 | 4 | #####    | #####    |
| 11 | 2 ES | 2020-13 | 4 ES-Center | 2 | 5 | 0        | 0        |
| 12 | 2 ES | 2020-13 | 4 ES-Center | 3 | 1 | 1.543706 | #####    |
| 13 | 2 ES | 2020-13 | 4 ES-Center | 3 | 2 | 4        | 3.266291 |
| 14 | 2 ES | 2020-13 | 4 ES-Center | 3 | 3 | 1.6875   | 1.509794 |
| 15 | 2 ES | 2020-13 | 4 ES-Center | 3 | 4 | 1.368421 | #####    |
| 16 | 2 ES | 2020-13 | 4 ES-Center | 3 | 5 | 0        | 0        |
| 17 | 2 ES | 2020-13 | 4 ES-East   | 1 | 1 | #####    | #####    |
| 18 | 2 ES | 2020-13 | 4 ES-East   | 1 | 2 | #####    | #####    |
| 19 | 2 ES | 2020-13 | 4 ES-East   | 1 | 3 | #####    | #####    |
| 20 | 2 ES | 2020-13 | 4 ES-East   | 1 | 4 | #####    | #####    |
| 21 | 2 ES | 2020-13 | 4 ES-East   | 1 | 5 | #####    | #####    |
| 22 | 2 ES | 2020-13 | 4 ES-East   | 2 | 1 | #####    | #####    |
| 23 | 2 ES | 2020-13 | 4 ES-East   | 2 | 2 | 0.8125   | #####    |
| 24 | 2 ES | 2020-13 | 4 ES-East   | 2 | 3 | #####    | #####    |
| 25 | 2 ES | 2020-13 | 4 ES-East   | 2 | 4 | 1.052083 | #####    |
| 26 | 2 ES | 2020-13 | 4 ES-East   | 2 | 5 | #####    | #####    |
| 27 | 2 ES | 2020-13 | 4 ES-East   | 3 | 1 | #####    | #####    |
| 28 | 2 ES | 2020-13 | 4 ES-East   | 3 | 2 | 0        | 0        |
| 29 | 2 ES | 2020-13 | 4 ES-East   | 3 | 3 | 1.083333 | #####    |
| 30 | 2 ES | 2020-13 | 4 ES-East   | 3 | 4 | #####    | #####    |
| 31 | 2 ES | 2020-13 | 4 ES-East   | 3 | 5 | 0        | 0        |
| 32 | 2 ES | 2020-13 | 4 ES-Island | 1 | 1 | #####    | #####    |
| 33 | 2 ES | 2020-13 | 4 ES-Island | 1 | 2 | 0        | 0        |
| 34 | 2 ES | 2020-13 | 4 ES-Island | 1 | 3 | 1.64725  | #####    |
| 35 | 2 ES | 2020-13 | 4 ES-Island | 1 | 4 | #####    | #####    |
| 36 | 2 ES | 2020-13 | 4 ES-Island | 1 | 5 | #####    | #####    |
| 37 | 2 ES | 2020-13 | 4 ES-Island | 2 | 1 | #####    | #####    |
| 38 | 2 ES | 2020-13 | 4 ES-Island | 2 | 2 | 0        | 0        |
| 39 | 2 ES | 2020-13 | 4 ES-Island | 2 | 3 | 1.78125  | #####    |
| 40 | 2 ES | 2020-13 | 4 ES-Island | 2 | 4 | #####    | #####    |
| 41 | 2 ES | 2020-13 | 4 ES-Island | 2 | 5 | 0        | 0        |
| 42 | 2 ES | 2020-13 | 4 ES-Island | 3 | 1 | 1.127101 | #####    |
| 43 | 2 ES | 2020-13 | 4 ES-Island | 3 | 3 | 1.428571 | 1.322724 |
| 44 | 2 ES | 2020-13 | 4 ES-Island | 3 | 4 | 1.416667 | #####    |
| 45 | 2 ES | 2020-13 | 4 ES-Island | 3 | 5 | 0.3      | #####    |
| 46 | 2 ES | 2020-13 | 4 ES-Madrid | 1 | 1 | #####    | #####    |
| 47 | 2 ES | 2020-13 | 4 ES-Madrid | 1 | 2 | #####    | #####    |
| 48 | 2 ES | 2020-13 | 4 ES-Madrid | 1 | 3 | #####    | #####    |
| 49 | 2 ES | 2020-13 | 4 ES-Madrid | 1 | 4 | #####    | #####    |
| 50 | 2 ES | 2020-13 | 4 ES-Madrid | 1 | 5 | #####    | #####    |
| 51 | 2 ES | 2020-13 | 4 ES-Madrid | 2 | 1 | #####    | #####    |
| 52 | 2 ES | 2020-13 | 4 ES-Madrid | 2 | 2 | #####    | #####    |
| 53 | 2 ES | 2020-13 | 4 ES-Madrid | 2 | 3 | #####    | #####    |
| 54 | 2 ES | 2020-13 | 4 ES-Madrid | 2 | 4 | #####    | #####    |
| 55 | 2 ES | 2020-13 | 4 ES-Madrid | 2 | 5 | #####    | #####    |
| 56 | 2 ES | 2020-13 | 4 ES-Madrid | 3 | 1 | #####    | #####    |
| 57 | 2 ES | 2020-13 | 4 ES-Madrid | 3 | 2 | #####    | #####    |
| 58 | 2 ES | 2020-13 | 4 ES-Madrid | 3 | 3 | 0        | 0        |
| 59 | 2 ES | 2020-13 | 4 ES-Madrid | 3 | 3 | 0        | 0        |
| 60 | 2 ES | 2020-13 | 4 ES-Madrid | 3 | 3 | 0        | 0        |

|    |      |         |              |   |   |          |          |  |
|----|------|---------|--------------|---|---|----------|----------|--|
| 1  |      |         |              |   |   |          |          |  |
| 2  |      |         |              |   |   |          |          |  |
| 3  | 2 ES | 2020-13 | 4 ES-Madrid  | 3 | 4 | 1.121212 | #####    |  |
| 4  | 2 ES | 2020-13 | 4 ES-Madrid  | 3 | 5 | 0        | 0        |  |
| 5  | 2 ES | 2020-13 | 4 ES-Northea | 1 | 1 | #####    | #####    |  |
| 6  | 2 ES | 2020-13 | 4 ES-Northea | 1 | 2 | 4.050656 | 2.194772 |  |
| 7  | 2 ES | 2020-13 | 4 ES-Northea | 1 | 3 | #####    | #####    |  |
| 8  | 2 ES | 2020-13 | 4 ES-Northea | 1 | 4 | #####    | #####    |  |
| 9  | 2 ES | 2020-13 | 4 ES-Northea | 1 | 5 | #####    | #####    |  |
| 10 | 2 ES | 2020-13 | 4 ES-Northea | 2 | 1 | #####    | #####    |  |
| 11 | 2 ES | 2020-13 | 4 ES-Northea | 2 | 2 | 3        | 2.318621 |  |
| 12 | 2 ES | 2020-13 | 4 ES-Northea | 2 | 3 | #####    | #####    |  |
| 13 | 2 ES | 2020-13 | 4 ES-Northea | 2 | 4 | #####    | #####    |  |
| 14 | 2 ES | 2020-13 | 4 ES-Northea | 2 | 5 | 0        | 0        |  |
| 15 | 2 ES | 2020-13 | 4 ES-Northea | 3 | 1 | 1.137507 | #####    |  |
| 16 | 2 ES | 2020-13 | 4 ES-Northea | 3 | 2 | 5        | 3.535864 |  |
| 17 | 2 ES | 2020-13 | 4 ES-Northea | 3 | 3 | 1.176471 | 1.141451 |  |
| 18 | 2 ES | 2020-13 | 4 ES-Northea | 3 | 4 | 0        | 0        |  |
| 19 | 2 ES | 2020-13 | 4 ES-Northea | 3 | 5 | 0.1      | #####    |  |
| 20 | 2 ES | 2020-13 | 4 ES-Northw  | 1 | 1 | #####    | #####    |  |
| 21 | 2 ES | 2020-13 | 4 ES-Northw  | 1 | 2 | 0        | 0        |  |
| 22 | 2 ES | 2020-13 | 4 ES-Northw  | 1 | 3 | #####    | #####    |  |
| 23 | 2 ES | 2020-13 | 4 ES-Northw  | 1 | 4 | 1.025274 | #####    |  |
| 24 | 2 ES | 2020-13 | 4 ES-Northw  | 1 | 5 | #####    | #####    |  |
| 25 | 2 ES | 2020-13 | 4 ES-Northw  | 2 | 1 | #####    | #####    |  |
| 26 | 2 ES | 2020-13 | 4 ES-Northw  | 2 | 2 | 0        | 0        |  |
| 27 | 2 ES | 2020-13 | 4 ES-Northw  | 2 | 3 | 1        | #####    |  |
| 28 | 2 ES | 2020-13 | 4 ES-Northw  | 2 | 4 | 1.5      | #####    |  |
| 29 | 2 ES | 2020-13 | 4 ES-Northw  | 2 | 5 | #####    | #####    |  |
| 30 | 2 ES | 2020-13 | 4 ES-Northw  | 3 | 1 | #####    | #####    |  |
| 31 | 2 ES | 2020-13 | 4 ES-Northw  | 3 | 2 | 0        | 0        |  |
| 32 | 2 ES | 2020-13 | 4 ES-Northw  | 3 | 3 | 0.85     | #####    |  |
| 33 | 2 ES | 2020-13 | 4 ES-Northw  | 3 | 4 | 0.68     | #####    |  |
| 34 | 2 ES | 2020-13 | 4 ES-Northw  | 3 | 5 | #####    | #####    |  |
| 35 | 2 ES | 2020-13 | 4 ES-Overall | 1 | 1 | #####    | #####    |  |
| 36 | 2 ES | 2020-13 | 4 ES-Overall | 1 | 2 | #####    | #####    |  |
| 37 | 2 ES | 2020-13 | 4 ES-Overall | 1 | 3 | #####    | #####    |  |
| 38 | 2 ES | 2020-13 | 4 ES-Overall | 1 | 4 | #####    | #####    |  |
| 39 | 2 ES | 2020-13 | 4 ES-Overall | 1 | 5 | #####    | #####    |  |
| 40 | 2 ES | 2020-13 | 4 ES-Overall | 2 | 1 | #####    | #####    |  |
| 41 | 2 ES | 2020-13 | 4 ES-Overall | 2 | 2 | #####    | #####    |  |
| 42 | 2 ES | 2020-13 | 4 ES-Overall | 2 | 3 | #####    | #####    |  |
| 43 | 2 ES | 2020-13 | 4 ES-Overall | 2 | 4 | #####    | #####    |  |
| 44 | 2 ES | 2020-13 | 4 ES-Overall | 2 | 5 | #####    | #####    |  |
| 45 | 2 ES | 2020-13 | 4 ES-Overall | 3 | 1 | #####    | #####    |  |
| 46 | 2 ES | 2020-13 | 4 ES-Overall | 3 | 2 | 1.387608 | #####    |  |
| 47 | 2 ES | 2020-13 | 4 ES-Overall | 3 | 3 | #####    | #####    |  |
| 48 | 2 ES | 2020-13 | 4 ES-Overall | 3 | 4 | #####    | #####    |  |
| 49 | 2 ES | 2020-13 | 4 ES-Overall | 3 | 5 | #####    | #####    |  |
| 50 | 2 ES | 2020-13 | 4 ES-South   | 1 | 1 | #####    | #####    |  |
| 51 | 2 ES | 2020-13 | 4 ES-South   | 1 | 2 | 1.62816  | #####    |  |
| 52 | 2 ES | 2020-13 | 4 ES-South   | 1 | 3 | #####    | #####    |  |
| 53 | 2 ES | 2020-13 | 4 ES-South   | 1 | 4 | #####    | #####    |  |
| 54 | 2 ES | 2020-13 | 4 ES-South   | 1 | 5 | 0        | 0        |  |
| 55 | 2 ES | 2020-13 | 4 ES-South   | 2 | 1 | #####    | #####    |  |
| 56 | 2 ES | 2020-13 | 4 ES-South   | 2 | 2 | 0        | 0        |  |
| 57 | 2 ES | 2020-13 | 4 ES-South   | 2 | 3 | #####    | #####    |  |
| 58 | 2 ES | 2020-13 | 4 ES-South   | 2 | 4 | #####    | #####    |  |
| 59 | 2 ES | 2020-13 | 4 ES-South   | 2 | 5 | #####    | #####    |  |
| 60 | 2 ES | 2020-13 | 4 ES-South   | 2 | 4 | #####    | #####    |  |

|    |      |         |             |   |   |          |          |  |
|----|------|---------|-------------|---|---|----------|----------|--|
| 1  |      |         |             |   |   |          |          |  |
| 2  |      |         |             |   |   |          |          |  |
| 3  | 2 ES | 2020-13 | 4 ES-South  | 2 | 5 | 0        | 0        |  |
| 4  | 2 ES | 2020-13 | 4 ES-South  | 3 | 1 | #####    | #####    |  |
| 5  | 2 ES | 2020-13 | 4 ES-South  | 3 | 2 | 3.666667 | 1.655673 |  |
| 6  | 2 ES | 2020-13 | 4 ES-South  | 3 | 3 | 0        | 0        |  |
| 7  | 2 ES | 2020-13 | 4 ES-South  | 3 | 4 | #####    | #####    |  |
| 8  | 2 ES | 2020-13 | 4 ES-South  | 3 | 5 | 0        | 0        |  |
| 9  | 2 ES | 2020-13 | 5 ES-Center | 1 | 1 | #####    | #####    |  |
| 10 | 2 ES | 2020-13 | 5 ES-Center | 1 | 2 | #####    | #####    |  |
| 11 | 2 ES | 2020-13 | 5 ES-Center | 1 | 3 | #####    | #####    |  |
| 12 | 2 ES | 2020-13 | 5 ES-Center | 1 | 4 | #####    | #####    |  |
| 13 | 2 ES | 2020-13 | 5 ES-Center | 1 | 5 | #####    | #####    |  |
| 14 | 2 ES | 2020-13 | 5 ES-Center | 2 | 1 | #####    | #####    |  |
| 15 | 2 ES | 2020-13 | 5 ES-Center | 2 | 2 | 0.8      | #####    |  |
| 16 | 2 ES | 2020-13 | 5 ES-Center | 2 | 3 | #####    | #####    |  |
| 17 | 2 ES | 2020-13 | 5 ES-Center | 2 | 4 | #####    | #####    |  |
| 18 | 2 ES | 2020-13 | 5 ES-Center | 2 | 5 | 0        | 0        |  |
| 19 | 2 ES | 2020-13 | 5 ES-Center | 3 | 1 | #####    | #####    |  |
| 20 | 2 ES | 2020-13 | 5 ES-Center | 3 | 2 | 0        | 0        |  |
| 21 | 2 ES | 2020-13 | 5 ES-Center | 3 | 3 | 0.3125   | #####    |  |
| 22 | 2 ES | 2020-13 | 5 ES-Center | 3 | 4 | #####    | #####    |  |
| 23 | 2 ES | 2020-13 | 5 ES-Center | 3 | 5 | #####    | #####    |  |
| 24 | 2 ES | 2020-13 | 5 ES-Center | 3 | 5 | #####    | #####    |  |
| 25 | 2 ES | 2020-13 | 5 ES-East   | 1 | 1 | #####    | #####    |  |
| 26 | 2 ES | 2020-13 | 5 ES-East   | 1 | 2 | #####    | #####    |  |
| 27 | 2 ES | 2020-13 | 5 ES-East   | 1 | 3 | #####    | #####    |  |
| 28 | 2 ES | 2020-13 | 5 ES-East   | 1 | 4 | #####    | #####    |  |
| 29 | 2 ES | 2020-13 | 5 ES-East   | 1 | 5 | #####    | #####    |  |
| 30 | 2 ES | 2020-13 | 5 ES-East   | 2 | 1 | #####    | #####    |  |
| 31 | 2 ES | 2020-13 | 5 ES-East   | 2 | 2 | #####    | #####    |  |
| 32 | 2 ES | 2020-13 | 5 ES-East   | 2 | 3 | #####    | #####    |  |
| 33 | 2 ES | 2020-13 | 5 ES-East   | 2 | 4 | #####    | #####    |  |
| 34 | 2 ES | 2020-13 | 5 ES-East   | 2 | 5 | #####    | #####    |  |
| 35 | 2 ES | 2020-13 | 5 ES-East   | 3 | 1 | #####    | #####    |  |
| 36 | 2 ES | 2020-13 | 5 ES-East   | 3 | 2 | #####    | #####    |  |
| 37 | 2 ES | 2020-13 | 5 ES-East   | 3 | 3 | #####    | #####    |  |
| 38 | 2 ES | 2020-13 | 5 ES-East   | 3 | 4 | 1        | #####    |  |
| 39 | 2 ES | 2020-13 | 5 ES-East   | 3 | 5 | #####    | #####    |  |
| 40 | 2 ES | 2020-13 | 5 ES-Island | 1 | 1 | #####    | #####    |  |
| 41 | 2 ES | 2020-13 | 5 ES-Island | 1 | 2 | 1.363636 | #####    |  |
| 42 | 2 ES | 2020-13 | 5 ES-Island | 1 | 3 | #####    | #####    |  |
| 43 | 2 ES | 2020-13 | 5 ES-Island | 1 | 4 | #####    | #####    |  |
| 44 | 2 ES | 2020-13 | 5 ES-Island | 1 | 5 | #####    | #####    |  |
| 45 | 2 ES | 2020-13 | 5 ES-Island | 2 | 1 | #####    | #####    |  |
| 46 | 2 ES | 2020-13 | 5 ES-Island | 2 | 2 | 1.363636 | #####    |  |
| 47 | 2 ES | 2020-13 | 5 ES-Island | 2 | 3 | #####    | #####    |  |
| 48 | 2 ES | 2020-13 | 5 ES-Island | 2 | 4 | #####    | #####    |  |
| 49 | 2 ES | 2020-13 | 5 ES-Island | 2 | 5 | #####    | #####    |  |
| 50 | 2 ES | 2020-13 | 5 ES-Island | 3 | 1 | #####    | #####    |  |
| 51 | 2 ES | 2020-13 | 5 ES-Island | 3 | 3 | #####    | #####    |  |
| 52 | 2 ES | 2020-13 | 5 ES-Island | 3 | 4 | #####    | #####    |  |
| 53 | 2 ES | 2020-13 | 5 ES-Island | 3 | 5 | 0        | 0        |  |
| 54 | 2 ES | 2020-13 | 5 ES-Madrid | 1 | 1 | #####    | #####    |  |
| 55 | 2 ES | 2020-13 | 5 ES-Madrid | 1 | 2 | #####    | #####    |  |
| 56 | 2 ES | 2020-13 | 5 ES-Madrid | 1 | 3 | #####    | #####    |  |
| 57 | 2 ES | 2020-13 | 5 ES-Madrid | 1 | 4 | #####    | #####    |  |
| 58 | 2 ES | 2020-13 | 5 ES-Madrid | 1 | 5 | #####    | #####    |  |
| 59 | 2 ES | 2020-13 | 5 ES-Madrid | 1 | 5 | #####    | #####    |  |
| 60 | 2 ES | 2020-13 | 5 ES-Madrid | 2 | 1 | #####    | #####    |  |

|    |      |         |              |   |   |          |          |
|----|------|---------|--------------|---|---|----------|----------|
| 1  |      |         |              |   |   |          |          |
| 2  |      |         |              |   |   |          |          |
| 3  | 2 ES | 2020-13 | 5 ES-Madrid  | 2 | 2 | #####    | #####    |
| 4  | 2 ES | 2020-13 | 5 ES-Madrid  | 2 | 3 | #####    | #####    |
| 5  | 2 ES | 2020-13 | 5 ES-Madrid  | 2 | 4 | #####    | #####    |
| 6  | 2 ES | 2020-13 | 5 ES-Madrid  | 2 | 5 | #####    | #####    |
| 7  | 2 ES | 2020-13 | 5 ES-Madrid  | 3 | 1 | #####    | #####    |
| 8  | 2 ES | 2020-13 | 5 ES-Madrid  | 3 | 2 | #####    | #####    |
| 9  | 2 ES | 2020-13 | 5 ES-Madrid  | 3 | 3 | 0.4      | #####    |
| 10 | 2 ES | 2020-13 | 5 ES-Madrid  | 3 | 4 | #####    | #####    |
| 11 | 2 ES | 2020-13 | 5 ES-Madrid  | 3 | 5 | 0.8      | #####    |
| 12 | 2 ES | 2020-13 | 5 ES-Northea | 1 | 1 | #####    | #####    |
| 13 | 2 ES | 2020-13 | 5 ES-Northea | 1 | 2 | #####    | #####    |
| 14 | 2 ES | 2020-13 | 5 ES-Northea | 1 | 3 | #####    | #####    |
| 15 | 2 ES | 2020-13 | 5 ES-Northea | 1 | 4 | #####    | #####    |
| 16 | 2 ES | 2020-13 | 5 ES-Northea | 1 | 5 | #####    | #####    |
| 17 | 2 ES | 2020-13 | 5 ES-Northea | 2 | 1 | #####    | #####    |
| 18 | 2 ES | 2020-13 | 5 ES-Northea | 2 | 2 | 0.25     | #####    |
| 19 | 2 ES | 2020-13 | 5 ES-Northea | 2 | 3 | #####    | #####    |
| 20 | 2 ES | 2020-13 | 5 ES-Northea | 2 | 4 | #####    | #####    |
| 21 | 2 ES | 2020-13 | 5 ES-Northea | 2 | 5 | 0.75     | #####    |
| 22 | 2 ES | 2020-13 | 5 ES-Northea | 3 | 1 | #####    | #####    |
| 23 | 2 ES | 2020-13 | 5 ES-Northea | 3 | 2 | 0        | 0        |
| 24 | 2 ES | 2020-13 | 5 ES-Northea | 3 | 3 | 0.6875   | #####    |
| 25 | 2 ES | 2020-13 | 5 ES-Northea | 3 | 4 | #####    | #####    |
| 26 | 2 ES | 2020-13 | 5 ES-Northea | 3 | 5 | 0.1      | #####    |
| 27 | 2 ES | 2020-13 | 5 ES-Northw  | 1 | 1 | #####    | #####    |
| 28 | 2 ES | 2020-13 | 5 ES-Northw  | 1 | 2 | 1.91497  | #####    |
| 29 | 2 ES | 2020-13 | 5 ES-Northw  | 1 | 3 | #####    | #####    |
| 30 | 2 ES | 2020-13 | 5 ES-Northw  | 1 | 4 | #####    | #####    |
| 31 | 2 ES | 2020-13 | 5 ES-Northw  | 1 | 5 | #####    | #####    |
| 32 | 2 ES | 2020-13 | 5 ES-Northw  | 2 | 1 | #####    | #####    |
| 33 | 2 ES | 2020-13 | 5 ES-Northw  | 2 | 2 | #####    | #####    |
| 34 | 2 ES | 2020-13 | 5 ES-Northw  | 2 | 3 | #####    | #####    |
| 35 | 2 ES | 2020-13 | 5 ES-Northw  | 2 | 4 | #####    | #####    |
| 36 | 2 ES | 2020-13 | 5 ES-Northw  | 2 | 5 | #####    | #####    |
| 37 | 2 ES | 2020-13 | 5 ES-Northw  | 2 | 5 | #####    | #####    |
| 38 | 2 ES | 2020-13 | 5 ES-Northw  | 3 | 1 | 1.035937 | #####    |
| 39 | 2 ES | 2020-13 | 5 ES-Northw  | 3 | 2 | 3        | 1.274874 |
| 40 | 2 ES | 2020-13 | 5 ES-Northw  | 3 | 3 | 1.15     | #####    |
| 41 | 2 ES | 2020-13 | 5 ES-Northw  | 3 | 4 | 0.24     | #####    |
| 42 | 2 ES | 2020-13 | 5 ES-Northw  | 3 | 5 | #####    | #####    |
| 43 | 2 ES | 2020-13 | 5 ES-Overall | 1 | 1 | #####    | #####    |
| 44 | 2 ES | 2020-13 | 5 ES-Overall | 1 | 2 | #####    | #####    |
| 45 | 2 ES | 2020-13 | 5 ES-Overall | 1 | 3 | #####    | #####    |
| 46 | 2 ES | 2020-13 | 5 ES-Overall | 1 | 4 | #####    | #####    |
| 47 | 2 ES | 2020-13 | 5 ES-Overall | 1 | 5 | #####    | #####    |
| 48 | 2 ES | 2020-13 | 5 ES-Overall | 2 | 1 | #####    | #####    |
| 49 | 2 ES | 2020-13 | 5 ES-Overall | 2 | 2 | #####    | #####    |
| 50 | 2 ES | 2020-13 | 5 ES-Overall | 2 | 3 | #####    | #####    |
| 51 | 2 ES | 2020-13 | 5 ES-Overall | 2 | 4 | #####    | #####    |
| 52 | 2 ES | 2020-13 | 5 ES-Overall | 2 | 5 | #####    | #####    |
| 53 | 2 ES | 2020-13 | 5 ES-Overall | 3 | 1 | #####    | #####    |
| 54 | 2 ES | 2020-13 | 5 ES-Overall | 3 | 2 | #####    | #####    |
| 55 | 2 ES | 2020-13 | 5 ES-Overall | 3 | 3 | #####    | #####    |
| 56 | 2 ES | 2020-13 | 5 ES-Overall | 3 | 4 | #####    | #####    |
| 57 | 2 ES | 2020-13 | 5 ES-Overall | 3 | 5 | #####    | #####    |
| 58 | 2 ES | 2020-13 | 5 ES-South   | 1 | 1 | #####    | #####    |
| 59 | 2 ES | 2020-13 | 5 ES-South   | 1 | 2 | #####    | #####    |
| 60 | 2 ES | 2020-13 | 5 ES-South   | 1 | 2 | #####    | #####    |

|    |      |         |             |   |   |          |          |  |
|----|------|---------|-------------|---|---|----------|----------|--|
| 1  |      |         |             |   |   |          |          |  |
| 2  |      |         |             |   |   |          |          |  |
| 3  | 2 ES | 2020-13 | 5 ES-South  | 1 | 3 | #####    | #####    |  |
| 4  | 2 ES | 2020-13 | 5 ES-South  | 1 | 4 | #####    | #####    |  |
| 5  | 2 ES | 2020-13 | 5 ES-South  | 1 | 5 | #####    | #####    |  |
| 6  | 2 ES | 2020-13 | 5 ES-South  | 2 | 1 | #####    | #####    |  |
| 7  | 2 ES | 2020-13 | 5 ES-South  | 2 | 2 | #####    | #####    |  |
| 8  | 2 ES | 2020-13 | 5 ES-South  | 2 | 3 | #####    | #####    |  |
| 9  | 2 ES | 2020-13 | 5 ES-South  | 2 | 4 | #####    | #####    |  |
| 10 | 2 ES | 2020-13 | 5 ES-South  | 2 | 5 | #####    | #####    |  |
| 11 | 2 ES | 2020-13 | 5 ES-South  | 3 | 1 | #####    | #####    |  |
| 12 | 2 ES | 2020-13 | 5 ES-South  | 3 | 2 | 0        | 0        |  |
| 13 | 2 ES | 2020-13 | 5 ES-South  | 3 | 3 | 0        | 0        |  |
| 14 | 2 ES | 2020-13 | 5 ES-South  | 3 | 4 | #####    | #####    |  |
| 15 | 2 ES | 2020-13 | 5 ES-South  | 3 | 5 | 0.85     | #####    |  |
| 16 | 2 ES | 2020-14 | 1 ES-Center | 1 | 1 | 2.416719 | #####    |  |
| 17 | 2 ES | 2020-14 | 1 ES-Center | 1 | 2 | 3.953616 | 1.009622 |  |
| 18 | 2 ES | 2020-14 | 1 ES-Center | 1 | 3 | 2.324807 | #####    |  |
| 19 | 2 ES | 2020-14 | 1 ES-Center | 1 | 4 | 3.097492 | #####    |  |
| 20 | 2 ES | 2020-14 | 1 ES-Center | 1 | 5 | #####    | #####    |  |
| 21 | 2 ES | 2020-14 | 1 ES-Center | 2 | 1 | 2.332857 | #####    |  |
| 22 | 2 ES | 2020-14 | 1 ES-Center | 2 | 2 | 4.454545 | 1.241162 |  |
| 23 | 2 ES | 2020-14 | 1 ES-Center | 2 | 3 | 2.298246 | #####    |  |
| 24 | 2 ES | 2020-14 | 1 ES-Center | 2 | 4 | 3.177778 | #####    |  |
| 25 | 2 ES | 2020-14 | 1 ES-Center | 2 | 5 | #####    | #####    |  |
| 26 | 2 ES | 2020-14 | 1 ES-Center | 3 | 1 | 2.549399 | #####    |  |
| 27 | 2 ES | 2020-14 | 1 ES-Center | 3 | 2 | 3        | 1.633146 |  |
| 28 | 2 ES | 2020-14 | 1 ES-Center | 3 | 3 | 2.347826 | #####    |  |
| 29 | 2 ES | 2020-14 | 1 ES-Center | 3 | 4 | 3        | #####    |  |
| 30 | 2 ES | 2020-14 | 1 ES-Center | 3 | 5 | 1.333333 | #####    |  |
| 31 | 2 ES | 2020-14 | 1 ES-East   | 1 | 1 | 3.058737 | #####    |  |
| 32 | 2 ES | 2020-14 | 1 ES-East   | 1 | 2 | 4.44717  | #####    |  |
| 33 | 2 ES | 2020-14 | 1 ES-East   | 1 | 3 | 3.42242  | #####    |  |
| 34 | 2 ES | 2020-14 | 1 ES-East   | 1 | 4 | 2.968707 | #####    |  |
| 35 | 2 ES | 2020-14 | 1 ES-East   | 1 | 5 | 1.743526 | #####    |  |
| 36 | 2 ES | 2020-14 | 1 ES-East   | 2 | 1 | 2.765554 | #####    |  |
| 37 | 2 ES | 2020-14 | 1 ES-East   | 2 | 2 | 3.954545 | #####    |  |
| 38 | 2 ES | 2020-14 | 1 ES-East   | 2 | 3 | 3.257732 | #####    |  |
| 39 | 2 ES | 2020-14 | 1 ES-East   | 2 | 4 | 2.647727 | #####    |  |
| 40 | 2 ES | 2020-14 | 1 ES-East   | 2 | 5 | 1.75     | #####    |  |
| 41 | 2 ES | 2020-14 | 1 ES-East   | 3 | 1 | 3.414806 | #####    |  |
| 42 | 2 ES | 2020-14 | 1 ES-East   | 3 | 2 | 4.875    | 1.504691 |  |
| 43 | 2 ES | 2020-14 | 1 ES-East   | 3 | 3 | 3.666667 | 1.228181 |  |
| 44 | 2 ES | 2020-14 | 1 ES-East   | 3 | 4 | 3.245283 | #####    |  |
| 45 | 2 ES | 2020-14 | 1 ES-East   | 3 | 5 | 1.730769 | #####    |  |
| 46 | 2 ES | 2020-14 | 1 ES-Island | 1 | 1 | 2.498312 | #####    |  |
| 47 | 2 ES | 2020-14 | 1 ES-Island | 1 | 2 | 2.6      | #####    |  |
| 48 | 2 ES | 2020-14 | 1 ES-Island | 1 | 3 | 2.848873 | #####    |  |
| 49 | 2 ES | 2020-14 | 1 ES-Island | 1 | 4 | 2.38284  | #####    |  |
| 50 | 2 ES | 2020-14 | 1 ES-Island | 1 | 5 | 1.80052  | #####    |  |
| 51 | 2 ES | 2020-14 | 1 ES-Island | 2 | 1 | 2.535002 | #####    |  |
| 52 | 2 ES | 2020-14 | 1 ES-Island | 2 | 2 | 2.6      | #####    |  |
| 53 | 2 ES | 2020-14 | 1 ES-Island | 2 | 3 | 2.564103 | #####    |  |
| 54 | 2 ES | 2020-14 | 1 ES-Island | 2 | 4 | 2.647059 | #####    |  |
| 55 | 2 ES | 2020-14 | 1 ES-Island | 2 | 5 | 2.153846 | #####    |  |
| 56 | 2 ES | 2020-14 | 1 ES-Island | 3 | 1 | 2.451159 | #####    |  |
| 57 | 2 ES | 2020-14 | 1 ES-Island | 3 | 2 | 0        | 0        |  |
| 58 | 2 ES | 2020-14 | 1 ES-Island | 3 | 3 | 3.153846 | 1.103332 |  |
| 59 | 2 ES | 2020-14 | 1 ES-Island | 3 | 3 | 3.153846 | 1.103332 |  |
| 60 | 2 ES | 2020-14 | 1 ES-Island | 3 | 3 | 3.153846 | 1.103332 |  |

|    |      |         |              |   |   |          |          |  |
|----|------|---------|--------------|---|---|----------|----------|--|
| 1  |      |         |              |   |   |          |          |  |
| 2  |      |         |              |   |   |          |          |  |
| 3  | 2 ES | 2020-14 | 1 ES-Island  | 3 | 4 | 2.090909 | #####    |  |
| 4  | 2 ES | 2020-14 | 1 ES-Island  | 3 | 5 | 1.333333 | #####    |  |
| 5  | 2 ES | 2020-14 | 1 ES-Madrid  | 1 | 1 | 2.511297 | #####    |  |
| 6  | 2 ES | 2020-14 | 1 ES-Madrid  | 1 | 2 | 3.059616 | #####    |  |
| 7  | 2 ES | 2020-14 | 1 ES-Madrid  | 1 | 3 | 3.061546 | #####    |  |
| 8  | 2 ES | 2020-14 | 1 ES-Madrid  | 1 | 4 | 2.193065 | #####    |  |
| 9  | 2 ES | 2020-14 | 1 ES-Madrid  | 1 | 5 | 1.624307 | #####    |  |
| 10 | 2 ES | 2020-14 | 1 ES-Madrid  | 2 | 1 | 2.328179 | #####    |  |
| 11 | 2 ES | 2020-14 | 1 ES-Madrid  | 2 | 2 | 3.1      | #####    |  |
| 12 | 2 ES | 2020-14 | 1 ES-Madrid  | 2 | 3 | 2.469136 | #####    |  |
| 13 | 2 ES | 2020-14 | 1 ES-Madrid  | 2 | 4 | 2.380952 | #####    |  |
| 14 | 2 ES | 2020-14 | 1 ES-Madrid  | 2 | 5 | 1.47619  | #####    |  |
| 15 | 2 ES | 2020-14 | 1 ES-Madrid  | 3 | 1 | 2.736552 | #####    |  |
| 16 | 2 ES | 2020-14 | 1 ES-Madrid  | 3 | 2 | 3        | #####    |  |
| 17 | 2 ES | 2020-14 | 1 ES-Madrid  | 3 | 3 | 3.73913  | 1.063705 |  |
| 18 | 2 ES | 2020-14 | 1 ES-Madrid  | 3 | 4 | 2        | #####    |  |
| 19 | 2 ES | 2020-14 | 1 ES-Madrid  | 3 | 5 | 1.866667 | #####    |  |
| 20 | 2 ES | 2020-14 | 1 ES-Northea | 1 | 1 | 2.69274  | #####    |  |
| 21 | 2 ES | 2020-14 | 1 ES-Northea | 1 | 2 | 2.797432 | #####    |  |
| 22 | 2 ES | 2020-14 | 1 ES-Northea | 1 | 3 | 2.614913 | #####    |  |
| 23 | 2 ES | 2020-14 | 1 ES-Northea | 1 | 4 | 3.141553 | #####    |  |
| 24 | 2 ES | 2020-14 | 1 ES-Northea | 1 | 5 | 2.015315 | #####    |  |
| 25 | 2 ES | 2020-14 | 1 ES-Northea | 2 | 1 | 2.764789 | #####    |  |
| 26 | 2 ES | 2020-14 | 1 ES-Northea | 2 | 2 | 3        | #####    |  |
| 27 | 2 ES | 2020-14 | 1 ES-Northea | 2 | 3 | 3.022222 | #####    |  |
| 28 | 2 ES | 2020-14 | 1 ES-Northea | 2 | 4 | 3.355556 | #####    |  |
| 29 | 2 ES | 2020-14 | 1 ES-Northea | 2 | 5 | 1.375    | #####    |  |
| 30 | 2 ES | 2020-14 | 1 ES-Northea | 3 | 1 | 2.617975 | #####    |  |
| 31 | 2 ES | 2020-14 | 1 ES-Northea | 3 | 2 | 2.5      | 1.060759 |  |
| 32 | 2 ES | 2020-14 | 1 ES-Northea | 3 | 3 | 2.266667 | #####    |  |
| 33 | 2 ES | 2020-14 | 1 ES-Northea | 3 | 4 | 2.928571 | #####    |  |
| 34 | 2 ES | 2020-14 | 1 ES-Northea | 3 | 5 | 2.777778 | #####    |  |
| 35 | 2 ES | 2020-14 | 1 ES-Northw  | 1 | 1 | 2.880981 | #####    |  |
| 36 | 2 ES | 2020-14 | 1 ES-Northw  | 1 | 2 | 2.985457 | #####    |  |
| 37 | 2 ES | 2020-14 | 1 ES-Northw  | 1 | 3 | 3.289099 | #####    |  |
| 38 | 2 ES | 2020-14 | 1 ES-Northw  | 1 | 4 | 3.430579 | #####    |  |
| 39 | 2 ES | 2020-14 | 1 ES-Northw  | 1 | 5 | 1.549127 | #####    |  |
| 40 | 2 ES | 2020-14 | 1 ES-Northw  | 2 | 1 | 3.184452 | #####    |  |
| 41 | 2 ES | 2020-14 | 1 ES-Northw  | 2 | 2 | 3.705882 | #####    |  |
| 42 | 2 ES | 2020-14 | 1 ES-Northw  | 2 | 3 | 3.666667 | #####    |  |
| 43 | 2 ES | 2020-14 | 1 ES-Northw  | 2 | 4 | 4        | #####    |  |
| 44 | 2 ES | 2020-14 | 1 ES-Northw  | 2 | 5 | 1.333333 | #####    |  |
| 45 | 2 ES | 2020-14 | 1 ES-Northw  | 3 | 1 | 2.560148 | #####    |  |
| 46 | 2 ES | 2020-14 | 1 ES-Northw  | 3 | 2 | 2        | #####    |  |
| 47 | 2 ES | 2020-14 | 1 ES-Northw  | 3 | 3 | 2.9      | #####    |  |
| 48 | 2 ES | 2020-14 | 1 ES-Northw  | 3 | 4 | 2.903226 | #####    |  |
| 49 | 2 ES | 2020-14 | 1 ES-Northw  | 3 | 5 | 1.8      | #####    |  |
| 50 | 2 ES | 2020-14 | 1 ES-Overall | 1 | 1 | 2.732492 | #####    |  |
| 51 | 2 ES | 2020-14 | 1 ES-Overall | 1 | 2 | 3.342963 | #####    |  |
| 52 | 2 ES | 2020-14 | 1 ES-Overall | 1 | 3 | 3.041718 | #####    |  |
| 53 | 2 ES | 2020-14 | 1 ES-Overall | 1 | 4 | 2.937542 | #####    |  |
| 54 | 2 ES | 2020-14 | 1 ES-Overall | 1 | 5 | 1.549779 | #####    |  |
| 55 | 2 ES | 2020-14 | 1 ES-Overall | 2 | 1 | 2.651318 | #####    |  |
| 56 | 2 ES | 2020-14 | 1 ES-Overall | 2 | 2 | 3.384248 | #####    |  |
| 57 | 2 ES | 2020-14 | 1 ES-Overall | 2 | 3 | 3.088757 | #####    |  |
| 58 | 2 ES | 2020-14 | 1 ES-Overall | 2 | 4 | 2.890951 | #####    |  |
| 59 | 2 ES | 2020-14 | 1 ES-Overall | 2 | 5 |          |          |  |
| 60 | 2 ES | 2020-14 | 1 ES-Overall | 2 | 4 | 2.890951 | #####    |  |



|    |      |         |              |   |   |          |       |  |
|----|------|---------|--------------|---|---|----------|-------|--|
| 1  |      |         |              |   |   |          |       |  |
| 2  |      |         |              |   |   |          |       |  |
| 3  | 2 ES | 2020-14 | 1 ES-Overall | 2 | 5 | 1.415961 | ##### |  |
| 4  | 2 ES | 2020-14 | 1 ES-Overall | 3 | 1 | 2.831239 | ##### |  |
| 5  | 2 ES | 2020-14 | 1 ES-Overall | 3 | 2 | 3.292653 | ##### |  |
| 6  | 2 ES | 2020-14 | 1 ES-Overall | 3 | 3 | 2.990211 | ##### |  |
| 7  | 2 ES | 2020-14 | 1 ES-Overall | 3 | 4 | 2.985638 | ##### |  |
| 8  | 2 ES | 2020-14 | 1 ES-Overall | 3 | 5 | 1.794338 | ##### |  |
| 9  | 2 ES | 2020-14 | 1 ES-South   | 1 | 1 | 2.62815  | ##### |  |
| 10 | 2 ES | 2020-14 | 1 ES-South   | 1 | 2 | 2.075988 | ##### |  |
| 11 | 2 ES | 2020-14 | 1 ES-South   | 1 | 3 | 3.106697 | ##### |  |
| 12 | 2 ES | 2020-14 | 1 ES-South   | 1 | 4 | 3.197099 | ##### |  |
| 13 | 2 ES | 2020-14 | 1 ES-South   | 1 | 5 | 1.393829 | ##### |  |
| 14 | 2 ES | 2020-14 | 1 ES-South   | 2 | 1 | 2.647916 | ##### |  |
| 15 | 2 ES | 2020-14 | 1 ES-South   | 2 | 2 | 2.4      | ##### |  |
| 16 | 2 ES | 2020-14 | 1 ES-South   | 2 | 3 | 3.602564 | ##### |  |
| 17 | 2 ES | 2020-14 | 1 ES-South   | 2 | 4 | 2.727273 | ##### |  |
| 18 | 2 ES | 2020-14 | 1 ES-South   | 2 | 5 | 1.291667 | ##### |  |
| 19 | 2 ES | 2020-14 | 1 ES-South   | 3 | 1 | 2.60464  | ##### |  |
| 20 | 2 ES | 2020-14 | 1 ES-South   | 3 | 2 | 1.75     | ##### |  |
| 21 | 2 ES | 2020-14 | 1 ES-South   | 3 | 3 | 2.611111 | ##### |  |
| 22 | 2 ES | 2020-14 | 1 ES-South   | 3 | 4 | 3.814815 | ##### |  |
| 23 | 2 ES | 2020-14 | 1 ES-South   | 3 | 5 | 1.5625   | ##### |  |
| 24 | 2 ES | 2020-14 | 2 ES-Center  | 1 | 1 | 1.442038 | ##### |  |
| 25 | 2 ES | 2020-14 | 2 ES-Center  | 1 | 2 | 2.034636 | ##### |  |
| 26 | 2 ES | 2020-14 | 2 ES-Center  | 1 | 3 | 1.642367 | ##### |  |
| 27 | 2 ES | 2020-14 | 2 ES-Center  | 1 | 4 | 1.484558 | ##### |  |
| 28 | 2 ES | 2020-14 | 2 ES-Center  | 1 | 5 | #####    | ##### |  |
| 29 | 2 ES | 2020-14 | 2 ES-Center  | 2 | 1 | 1.441816 | ##### |  |
| 30 | 2 ES | 2020-14 | 2 ES-Center  | 2 | 2 | 2.409091 | ##### |  |
| 31 | 2 ES | 2020-14 | 2 ES-Center  | 2 | 3 | 1.734375 | ##### |  |
| 32 | 2 ES | 2020-14 | 2 ES-Center  | 2 | 4 | 1.5      | ##### |  |
| 33 | 2 ES | 2020-14 | 2 ES-Center  | 2 | 5 | #####    | ##### |  |
| 34 | 2 ES | 2020-14 | 2 ES-Center  | 3 | 1 | 1.442359 | ##### |  |
| 35 | 2 ES | 2020-14 | 2 ES-Center  | 3 | 2 | 1.5      | ##### |  |
| 36 | 2 ES | 2020-14 | 2 ES-Center  | 3 | 3 | 1.56     | ##### |  |
| 37 | 2 ES | 2020-14 | 2 ES-Center  | 3 | 4 | 1.466667 | ##### |  |
| 38 | 2 ES | 2020-14 | 2 ES-Center  | 3 | 5 | 0.75     | ##### |  |
| 39 | 2 ES | 2020-14 | 2 ES-East    | 1 | 1 | 1.704194 | ##### |  |
| 40 | 2 ES | 2020-14 | 2 ES-East    | 1 | 2 | 2.255446 | ##### |  |
| 41 | 2 ES | 2020-14 | 2 ES-East    | 1 | 3 | 1.721343 | ##### |  |
| 42 | 2 ES | 2020-14 | 2 ES-East    | 1 | 4 | 1.797539 | ##### |  |
| 43 | 2 ES | 2020-14 | 2 ES-East    | 1 | 5 | 1.123396 | ##### |  |
| 44 | 2 ES | 2020-14 | 2 ES-East    | 2 | 1 | 1.605419 | ##### |  |
| 45 | 2 ES | 2020-14 | 2 ES-East    | 2 | 2 | 2.04     | ##### |  |
| 46 | 2 ES | 2020-14 | 2 ES-East    | 2 | 3 | 1.720721 | ##### |  |
| 47 | 2 ES | 2020-14 | 2 ES-East    | 2 | 4 | 1.712766 | ##### |  |
| 48 | 2 ES | 2020-14 | 2 ES-East    | 2 | 5 | 1.12963  | ##### |  |
| 49 | 2 ES | 2020-14 | 2 ES-East    | 3 | 1 | 1.823789 | ##### |  |
| 50 | 2 ES | 2020-14 | 2 ES-East    | 3 | 2 | 2.444444 | ##### |  |
| 51 | 2 ES | 2020-14 | 2 ES-East    | 3 | 3 | 1.722222 | ##### |  |
| 52 | 2 ES | 2020-14 | 2 ES-East    | 3 | 4 | 1.872727 | ##### |  |
| 53 | 2 ES | 2020-14 | 2 ES-East    | 3 | 5 | 1.111111 | ##### |  |
| 54 | 2 ES | 2020-14 | 2 ES-Island  | 1 | 1 | 1.368352 | ##### |  |
| 55 | 2 ES | 2020-14 | 2 ES-Island  | 1 | 2 | 2.727273 | ##### |  |
| 56 | 2 ES | 2020-14 | 2 ES-Island  | 1 | 3 | 1.173385 | ##### |  |
| 57 | 2 ES | 2020-14 | 2 ES-Island  | 1 | 4 | 1.344039 | ##### |  |
| 58 | 2 ES | 2020-14 | 2 ES-Island  | 1 | 5 | 1.26684  | ##### |  |
| 59 | 2 ES | 2020-14 | 2 ES-Island  | 1 |   |          |       |  |
| 60 | 2 ES | 2020-14 | 2 ES-Island  | 1 |   |          |       |  |

|    |      |         |              |   |   |          |          |  |
|----|------|---------|--------------|---|---|----------|----------|--|
| 1  |      |         |              |   |   |          |          |  |
| 2  |      |         |              |   |   |          |          |  |
| 3  | 2 ES | 2020-14 | 2 ES-Island  | 2 | 1 | 1.628622 | #####    |  |
| 4  | 2 ES | 2020-14 | 2 ES-Island  | 2 | 2 | 2.727273 | #####    |  |
| 5  | 2 ES | 2020-14 | 2 ES-Island  | 2 | 3 | 1.52381  | #####    |  |
| 6  | 2 ES | 2020-14 | 2 ES-Island  | 2 | 4 | 1.438596 | #####    |  |
| 7  | 2 ES | 2020-14 | 2 ES-Island  | 2 | 5 | 1.384615 | #####    |  |
| 8  | 2 ES | 2020-14 | 2 ES-Island  | 3 | 1 | 1.006318 | #####    |  |
| 9  | 2 ES | 2020-14 | 2 ES-Island  | 3 | 2 | 0        | 0        |  |
| 10 | 2 ES | 2020-14 | 2 ES-Island  | 3 | 3 | #####    | #####    |  |
| 11 | 2 ES | 2020-14 | 2 ES-Island  | 3 | 4 | 1.227273 | #####    |  |
| 12 | 2 ES | 2020-14 | 2 ES-Island  | 3 | 5 | 1.111111 | #####    |  |
| 13 | 2 ES | 2020-14 | 2 ES-Madrid  | 1 | 1 | 1.579837 | #####    |  |
| 14 | 2 ES | 2020-14 | 2 ES-Madrid  | 1 | 2 | 2.531462 | #####    |  |
| 15 | 2 ES | 2020-14 | 2 ES-Madrid  | 1 | 3 | 1.512992 | #####    |  |
| 16 | 2 ES | 2020-14 | 2 ES-Madrid  | 1 | 4 | 1.578162 | #####    |  |
| 17 | 2 ES | 2020-14 | 2 ES-Madrid  | 1 | 5 | #####    | #####    |  |
| 18 | 2 ES | 2020-14 | 2 ES-Madrid  | 2 | 1 | 1.580779 | #####    |  |
| 19 | 2 ES | 2020-14 | 2 ES-Madrid  | 2 | 2 | 2.47619  | #####    |  |
| 20 | 2 ES | 2020-14 | 2 ES-Madrid  | 2 | 3 | 1.647727 | #####    |  |
| 21 | 2 ES | 2020-14 | 2 ES-Madrid  | 2 | 4 | 1.577465 | #####    |  |
| 22 | 2 ES | 2020-14 | 2 ES-Madrid  | 2 | 5 | #####    | #####    |  |
| 23 | 2 ES | 2020-14 | 2 ES-Madrid  | 3 | 1 | 1.578701 | #####    |  |
| 24 | 2 ES | 2020-14 | 2 ES-Madrid  | 3 | 2 | 2.6      | #####    |  |
| 25 | 2 ES | 2020-14 | 2 ES-Madrid  | 3 | 3 | 1.37037  | #####    |  |
| 26 | 2 ES | 2020-14 | 2 ES-Madrid  | 3 | 4 | 1.578947 | #####    |  |
| 27 | 2 ES | 2020-14 | 2 ES-Madrid  | 3 | 5 | 1.066667 | #####    |  |
| 28 | 2 ES | 2020-14 | 2 ES-Northea | 1 | 1 | 1.716878 | #####    |  |
| 29 | 2 ES | 2020-14 | 2 ES-Northea | 1 | 2 | 2.218783 | #####    |  |
| 30 | 2 ES | 2020-14 | 2 ES-Northea | 1 | 3 | 1.793126 | #####    |  |
| 31 | 2 ES | 2020-14 | 2 ES-Northea | 1 | 4 | 1.872227 | #####    |  |
| 32 | 2 ES | 2020-14 | 2 ES-Northea | 1 | 5 | 1        | #####    |  |
| 33 | 2 ES | 2020-14 | 2 ES-Northea | 2 | 1 | 1.824639 | #####    |  |
| 34 | 2 ES | 2020-14 | 2 ES-Northea | 2 | 2 | 2.357143 | #####    |  |
| 35 | 2 ES | 2020-14 | 2 ES-Northea | 2 | 3 | 1.916667 | #####    |  |
| 36 | 2 ES | 2020-14 | 2 ES-Northea | 2 | 4 | 2.0625   | #####    |  |
| 37 | 2 ES | 2020-14 | 2 ES-Northea | 2 | 5 | 1        | #####    |  |
| 38 | 2 ES | 2020-14 | 2 ES-Northea | 3 | 1 | 1.606637 | #####    |  |
| 39 | 2 ES | 2020-14 | 2 ES-Northea | 3 | 2 | 2        | 1.414346 |  |
| 40 | 2 ES | 2020-14 | 2 ES-Northea | 3 | 3 | 1.6875   | #####    |  |
| 41 | 2 ES | 2020-14 | 2 ES-Northea | 3 | 4 | 1.705882 | #####    |  |
| 42 | 2 ES | 2020-14 | 2 ES-Northea | 3 | 5 | 1        | #####    |  |
| 43 | 2 ES | 2020-14 | 2 ES-Northw  | 1 | 1 | 1.746474 | #####    |  |
| 44 | 2 ES | 2020-14 | 2 ES-Northw  | 1 | 2 | 2.140565 | #####    |  |
| 45 | 2 ES | 2020-14 | 2 ES-Northw  | 1 | 3 | 1.91192  | #####    |  |
| 46 | 2 ES | 2020-14 | 2 ES-Northw  | 1 | 4 | 1.748302 | #####    |  |
| 47 | 2 ES | 2020-14 | 2 ES-Northw  | 1 | 5 | 1.274563 | #####    |  |
| 48 | 2 ES | 2020-14 | 2 ES-Northw  | 2 | 1 | 1.687743 | #####    |  |
| 49 | 2 ES | 2020-14 | 2 ES-Northw  | 2 | 2 | 2.263158 | #####    |  |
| 50 | 2 ES | 2020-14 | 2 ES-Northw  | 2 | 3 | 1.782051 | #####    |  |
| 51 | 2 ES | 2020-14 | 2 ES-Northw  | 2 | 4 | 1.738462 | #####    |  |
| 52 | 2 ES | 2020-14 | 2 ES-Northw  | 2 | 5 | 1.166667 | #####    |  |
| 53 | 2 ES | 2020-14 | 2 ES-Northw  | 3 | 1 | 1.807322 | #####    |  |
| 54 | 2 ES | 2020-14 | 2 ES-Northw  | 3 | 2 | 2        | #####    |  |
| 55 | 2 ES | 2020-14 | 2 ES-Northw  | 3 | 3 | 2.043478 | #####    |  |
| 56 | 2 ES | 2020-14 | 2 ES-Northw  | 3 | 4 | 1.757576 | #####    |  |
| 57 | 2 ES | 2020-14 | 2 ES-Northw  | 3 | 5 | 1.4      | #####    |  |
| 58 | 2 ES | 2020-14 | 2 ES-Overall | 1 | 1 | 1.614941 | #####    |  |
| 59 | 2 ES | 2020-14 | 2 ES-Overall | 1 | 1 | 1.614941 | #####    |  |
| 60 | 2 ES | 2020-14 | 2 ES-Overall | 1 | 1 | 1.614941 | #####    |  |

|    |      |         |              |   |   |          |       |  |  |
|----|------|---------|--------------|---|---|----------|-------|--|--|
| 1  |      |         |              |   |   |          |       |  |  |
| 2  |      |         |              |   |   |          |       |  |  |
| 3  | 2 ES | 2020-14 | 2 ES-Overall | 1 | 2 | 2.128774 | ##### |  |  |
| 4  | 2 ES | 2020-14 | 2 ES-Overall | 1 | 3 | 1.668738 | ##### |  |  |
| 5  | 2 ES | 2020-14 | 2 ES-Overall | 1 | 4 | 1.691877 | ##### |  |  |
| 6  | 2 ES | 2020-14 | 2 ES-Overall | 1 | 5 | 1.036417 | ##### |  |  |
| 7  | 2 ES | 2020-14 | 2 ES-Overall | 2 | 1 | 1.61728  | ##### |  |  |
| 8  | 2 ES | 2020-14 | 2 ES-Overall | 2 | 2 | 2.163027 | ##### |  |  |
| 9  | 2 ES | 2020-14 | 2 ES-Overall | 2 | 3 | 1.767884 | ##### |  |  |
| 10 | 2 ES | 2020-14 | 2 ES-Overall | 2 | 4 | 1.691014 | ##### |  |  |
| 11 | 2 ES | 2020-14 | 2 ES-Overall | 2 | 5 | #####    | ##### |  |  |
| 12 | 2 ES | 2020-14 | 2 ES-Overall | 3 | 1 | 1.612155 | ##### |  |  |
| 13 | 2 ES | 2020-14 | 2 ES-Overall | 3 | 2 | 2.088947 | ##### |  |  |
| 14 | 2 ES | 2020-14 | 2 ES-Overall | 3 | 3 | 1.563395 | ##### |  |  |
| 15 | 2 ES | 2020-14 | 2 ES-Overall | 3 | 4 | 1.692774 | ##### |  |  |
| 16 | 2 ES | 2020-14 | 2 ES-Overall | 3 | 5 | 1.103073 | ##### |  |  |
| 17 | 2 ES | 2020-14 | 2 ES-South   | 1 | 1 | 1.575017 | ##### |  |  |
| 18 | 2 ES | 2020-14 | 2 ES-South   | 1 | 2 | 1.597059 | ##### |  |  |
| 19 | 2 ES | 2020-14 | 2 ES-South   | 1 | 3 | 1.729463 | ##### |  |  |
| 20 | 2 ES | 2020-14 | 2 ES-South   | 1 | 4 | 1.738563 | ##### |  |  |
| 21 | 2 ES | 2020-14 | 2 ES-South   | 1 | 5 | 1.022463 | ##### |  |  |
| 22 | 2 ES | 2020-14 | 2 ES-South   | 2 | 1 | 1.642378 | ##### |  |  |
| 23 | 2 ES | 2020-14 | 2 ES-South   | 2 | 2 | 1.6875   | ##### |  |  |
| 24 | 2 ES | 2020-14 | 2 ES-South   | 2 | 3 | 1.952381 | ##### |  |  |
| 25 | 2 ES | 2020-14 | 2 ES-South   | 2 | 4 | 1.75     | ##### |  |  |
| 26 | 2 ES | 2020-14 | 2 ES-South   | 2 | 5 | 1        | ##### |  |  |
| 27 | 2 ES | 2020-14 | 2 ES-South   | 3 | 1 | 1.497987 | ##### |  |  |
| 28 | 2 ES | 2020-14 | 2 ES-South   | 3 | 2 | 1.5      | ##### |  |  |
| 29 | 2 ES | 2020-14 | 2 ES-South   | 3 | 3 | 1.52381  | ##### |  |  |
| 30 | 2 ES | 2020-14 | 2 ES-South   | 3 | 4 | 1.724138 | ##### |  |  |
| 31 | 2 ES | 2020-14 | 2 ES-South   | 3 | 5 | 1.058824 | ##### |  |  |
| 32 | 2 ES | 2020-14 | 3 ES-Center  | 1 | 1 | 0        | 0     |  |  |
| 33 | 2 ES | 2020-14 | 3 ES-Center  | 1 | 2 | 0        | 0     |  |  |
| 34 | 2 ES | 2020-14 | 3 ES-Center  | 1 | 3 | 0        | 0     |  |  |
| 35 | 2 ES | 2020-14 | 3 ES-Center  | 1 | 4 | 0        | 0     |  |  |
| 36 | 2 ES | 2020-14 | 3 ES-Center  | 1 | 5 | 0        | 0     |  |  |
| 37 | 2 ES | 2020-14 | 3 ES-Center  | 2 | 1 | 0        | 0     |  |  |
| 38 | 2 ES | 2020-14 | 3 ES-Center  | 2 | 2 | 0        | 0     |  |  |
| 39 | 2 ES | 2020-14 | 3 ES-Center  | 2 | 3 | 0        | 0     |  |  |
| 40 | 2 ES | 2020-14 | 3 ES-Center  | 2 | 4 | 0        | 0     |  |  |
| 41 | 2 ES | 2020-14 | 3 ES-Center  | 2 | 5 | 0        | 0     |  |  |
| 42 | 2 ES | 2020-14 | 3 ES-Center  | 3 | 1 | 0        | 0     |  |  |
| 43 | 2 ES | 2020-14 | 3 ES-Center  | 3 | 2 | 0        | 0     |  |  |
| 44 | 2 ES | 2020-14 | 3 ES-Center  | 3 | 3 | 0        | 0     |  |  |
| 45 | 2 ES | 2020-14 | 3 ES-Center  | 3 | 4 | 0        | 0     |  |  |
| 46 | 2 ES | 2020-14 | 3 ES-Center  | 3 | 5 | 0        | 0     |  |  |
| 47 | 2 ES | 2020-14 | 3 ES-Center  | 3 | 5 | 0        | 0     |  |  |
| 48 | 2 ES | 2020-14 | 3 ES-East    | 1 | 1 | 0        | 0     |  |  |
| 49 | 2 ES | 2020-14 | 3 ES-East    | 1 | 2 | 0        | 0     |  |  |
| 50 | 2 ES | 2020-14 | 3 ES-East    | 1 | 3 | 0        | 0     |  |  |
| 51 | 2 ES | 2020-14 | 3 ES-East    | 1 | 4 | 0        | 0     |  |  |
| 52 | 2 ES | 2020-14 | 3 ES-East    | 1 | 5 | 0        | 0     |  |  |
| 53 | 2 ES | 2020-14 | 3 ES-East    | 2 | 1 | 0        | 0     |  |  |
| 54 | 2 ES | 2020-14 | 3 ES-East    | 2 | 2 | 0        | 0     |  |  |
| 55 | 2 ES | 2020-14 | 3 ES-East    | 2 | 3 | 0        | 0     |  |  |
| 56 | 2 ES | 2020-14 | 3 ES-East    | 2 | 4 | 0        | 0     |  |  |
| 57 | 2 ES | 2020-14 | 3 ES-East    | 2 | 5 | 0        | 0     |  |  |
| 58 | 2 ES | 2020-14 | 3 ES-East    | 3 | 1 | 0        | 0     |  |  |
| 59 | 2 ES | 2020-14 | 3 ES-East    | 3 | 2 | 0        | 0     |  |  |
| 60 | 2 ES | 2020-14 | 3 ES-East    | 3 | 2 | 0        | 0     |  |  |

|    |      |         |              |   |   |   |   |
|----|------|---------|--------------|---|---|---|---|
| 1  |      |         |              |   |   |   |   |
| 2  |      |         |              |   |   |   |   |
| 3  | 2 ES | 2020-14 | 3 ES-East    | 3 | 3 | 0 | 0 |
| 4  | 2 ES | 2020-14 | 3 ES-East    | 3 | 4 | 0 | 0 |
| 5  | 2 ES | 2020-14 | 3 ES-East    | 3 | 5 | 0 | 0 |
| 6  | 2 ES | 2020-14 | 3 ES-Island  | 1 | 1 | 0 | 0 |
| 7  | 2 ES | 2020-14 | 3 ES-Island  | 1 | 2 | 0 | 0 |
| 8  | 2 ES | 2020-14 | 3 ES-Island  | 1 | 3 | 0 | 0 |
| 9  | 2 ES | 2020-14 | 3 ES-Island  | 1 | 4 | 0 | 0 |
| 10 | 2 ES | 2020-14 | 3 ES-Island  | 1 | 5 | 0 | 0 |
| 11 | 2 ES | 2020-14 | 3 ES-Island  | 2 | 1 | 0 | 0 |
| 12 | 2 ES | 2020-14 | 3 ES-Island  | 2 | 2 | 0 | 0 |
| 13 | 2 ES | 2020-14 | 3 ES-Island  | 2 | 3 | 0 | 0 |
| 14 | 2 ES | 2020-14 | 3 ES-Island  | 2 | 4 | 0 | 0 |
| 15 | 2 ES | 2020-14 | 3 ES-Island  | 2 | 5 | 0 | 0 |
| 16 | 2 ES | 2020-14 | 3 ES-Island  | 3 | 1 | 0 | 0 |
| 17 | 2 ES | 2020-14 | 3 ES-Island  | 3 | 2 | 0 | 0 |
| 18 | 2 ES | 2020-14 | 3 ES-Island  | 3 | 3 | 0 | 0 |
| 19 | 2 ES | 2020-14 | 3 ES-Island  | 3 | 4 | 0 | 0 |
| 20 | 2 ES | 2020-14 | 3 ES-Island  | 3 | 5 | 0 | 0 |
| 21 | 2 ES | 2020-14 | 3 ES-Island  | 3 | 5 | 0 | 0 |
| 22 | 2 ES | 2020-14 | 3 ES-Madrid  | 1 | 1 | 0 | 0 |
| 23 | 2 ES | 2020-14 | 3 ES-Madrid  | 1 | 2 | 0 | 0 |
| 24 | 2 ES | 2020-14 | 3 ES-Madrid  | 1 | 3 | 0 | 0 |
| 25 | 2 ES | 2020-14 | 3 ES-Madrid  | 1 | 4 | 0 | 0 |
| 26 | 2 ES | 2020-14 | 3 ES-Madrid  | 1 | 5 | 0 | 0 |
| 27 | 2 ES | 2020-14 | 3 ES-Madrid  | 2 | 1 | 0 | 0 |
| 28 | 2 ES | 2020-14 | 3 ES-Madrid  | 2 | 2 | 0 | 0 |
| 29 | 2 ES | 2020-14 | 3 ES-Madrid  | 2 | 3 | 0 | 0 |
| 30 | 2 ES | 2020-14 | 3 ES-Madrid  | 2 | 4 | 0 | 0 |
| 31 | 2 ES | 2020-14 | 3 ES-Madrid  | 2 | 5 | 0 | 0 |
| 32 | 2 ES | 2020-14 | 3 ES-Madrid  | 3 | 1 | 0 | 0 |
| 33 | 2 ES | 2020-14 | 3 ES-Madrid  | 3 | 2 | 0 | 0 |
| 34 | 2 ES | 2020-14 | 3 ES-Madrid  | 3 | 3 | 0 | 0 |
| 35 | 2 ES | 2020-14 | 3 ES-Madrid  | 3 | 4 | 0 | 0 |
| 36 | 2 ES | 2020-14 | 3 ES-Madrid  | 3 | 5 | 0 | 0 |
| 37 | 2 ES | 2020-14 | 3 ES-Northea | 1 | 1 | 0 | 0 |
| 38 | 2 ES | 2020-14 | 3 ES-Northea | 1 | 2 | 0 | 0 |
| 39 | 2 ES | 2020-14 | 3 ES-Northea | 1 | 3 | 0 | 0 |
| 40 | 2 ES | 2020-14 | 3 ES-Northea | 1 | 4 | 0 | 0 |
| 41 | 2 ES | 2020-14 | 3 ES-Northea | 1 | 5 | 0 | 0 |
| 42 | 2 ES | 2020-14 | 3 ES-Northea | 2 | 1 | 0 | 0 |
| 43 | 2 ES | 2020-14 | 3 ES-Northea | 2 | 2 | 0 | 0 |
| 44 | 2 ES | 2020-14 | 3 ES-Northea | 2 | 3 | 0 | 0 |
| 45 | 2 ES | 2020-14 | 3 ES-Northea | 2 | 4 | 0 | 0 |
| 46 | 2 ES | 2020-14 | 3 ES-Northea | 2 | 5 | 0 | 0 |
| 47 | 2 ES | 2020-14 | 3 ES-Northea | 3 | 1 | 0 | 0 |
| 48 | 2 ES | 2020-14 | 3 ES-Northea | 3 | 2 | 0 | 0 |
| 49 | 2 ES | 2020-14 | 3 ES-Northea | 3 | 3 | 0 | 0 |
| 50 | 2 ES | 2020-14 | 3 ES-Northea | 3 | 4 | 0 | 0 |
| 51 | 2 ES | 2020-14 | 3 ES-Northea | 3 | 5 | 0 | 0 |
| 52 | 2 ES | 2020-14 | 3 ES-Northw  | 1 | 1 | 0 | 0 |
| 53 | 2 ES | 2020-14 | 3 ES-Northw  | 1 | 2 | 0 | 0 |
| 54 | 2 ES | 2020-14 | 3 ES-Northw  | 1 | 3 | 0 | 0 |
| 55 | 2 ES | 2020-14 | 3 ES-Northw  | 1 | 4 | 0 | 0 |
| 56 | 2 ES | 2020-14 | 3 ES-Northw  | 1 | 5 | 0 | 0 |
| 57 | 2 ES | 2020-14 | 3 ES-Northw  | 2 | 1 | 0 | 0 |
| 58 | 2 ES | 2020-14 | 3 ES-Northw  | 2 | 2 | 0 | 0 |
| 59 | 2 ES | 2020-14 | 3 ES-Northw  | 2 | 3 | 0 | 0 |
| 60 | 2 ES | 2020-14 | 3 ES-Northw  | 2 | 3 | 0 | 0 |

|    |      |         |              |   |   |          |          |  |
|----|------|---------|--------------|---|---|----------|----------|--|
| 1  |      |         |              |   |   |          |          |  |
| 2  |      |         |              |   |   |          |          |  |
| 3  | 2 ES | 2020-14 | 3 ES-Northw  | 2 | 4 | 0        | 0        |  |
| 4  | 2 ES | 2020-14 | 3 ES-Northw  | 2 | 5 | 0        | 0        |  |
| 5  | 2 ES | 2020-14 | 3 ES-Northw  | 3 | 1 | 0        | 0        |  |
| 6  | 2 ES | 2020-14 | 3 ES-Northw  | 3 | 2 | 0        | 0        |  |
| 7  | 2 ES | 2020-14 | 3 ES-Northw  | 3 | 3 | 0        | 0        |  |
| 8  | 2 ES | 2020-14 | 3 ES-Northw  | 3 | 4 | 0        | 0        |  |
| 9  | 2 ES | 2020-14 | 3 ES-Northw  | 3 | 5 | 0        | 0        |  |
| 10 | 2 ES | 2020-14 | 3 ES-Overall | 1 | 1 | 0        | 0        |  |
| 11 | 2 ES | 2020-14 | 3 ES-Overall | 1 | 2 | 0        | 0        |  |
| 12 | 2 ES | 2020-14 | 3 ES-Overall | 1 | 3 | 0        | 0        |  |
| 13 | 2 ES | 2020-14 | 3 ES-Overall | 1 | 4 | 0        | 0        |  |
| 14 | 2 ES | 2020-14 | 3 ES-Overall | 1 | 5 | 0        | 0        |  |
| 15 | 2 ES | 2020-14 | 3 ES-Overall | 2 | 1 | 0        | 0        |  |
| 16 | 2 ES | 2020-14 | 3 ES-Overall | 2 | 2 | 0        | 0        |  |
| 17 | 2 ES | 2020-14 | 3 ES-Overall | 2 | 3 | 0        | 0        |  |
| 18 | 2 ES | 2020-14 | 3 ES-Overall | 2 | 4 | 0        | 0        |  |
| 19 | 2 ES | 2020-14 | 3 ES-Overall | 2 | 5 | 0        | 0        |  |
| 20 | 2 ES | 2020-14 | 3 ES-Overall | 3 | 1 | 0        | 0        |  |
| 21 | 2 ES | 2020-14 | 3 ES-Overall | 3 | 2 | 0        | 0        |  |
| 22 | 2 ES | 2020-14 | 3 ES-Overall | 3 | 3 | 0        | 0        |  |
| 23 | 2 ES | 2020-14 | 3 ES-Overall | 3 | 4 | 0        | 0        |  |
| 24 | 2 ES | 2020-14 | 3 ES-Overall | 3 | 5 | 0        | 0        |  |
| 25 | 2 ES | 2020-14 | 3 ES-South   | 1 | 1 | 0        | 0        |  |
| 26 | 2 ES | 2020-14 | 3 ES-South   | 1 | 2 | 0        | 0        |  |
| 27 | 2 ES | 2020-14 | 3 ES-South   | 1 | 3 | 0        | 0        |  |
| 28 | 2 ES | 2020-14 | 3 ES-South   | 1 | 4 | 0        | 0        |  |
| 29 | 2 ES | 2020-14 | 3 ES-South   | 1 | 5 | 0        | 0        |  |
| 30 | 2 ES | 2020-14 | 3 ES-South   | 2 | 1 | 0        | 0        |  |
| 31 | 2 ES | 2020-14 | 3 ES-South   | 2 | 2 | 0        | 0        |  |
| 32 | 2 ES | 2020-14 | 3 ES-South   | 2 | 3 | 0        | 0        |  |
| 33 | 2 ES | 2020-14 | 3 ES-South   | 2 | 4 | 0        | 0        |  |
| 34 | 2 ES | 2020-14 | 3 ES-South   | 2 | 5 | 0        | 0        |  |
| 35 | 2 ES | 2020-14 | 3 ES-South   | 3 | 1 | 0        | 0        |  |
| 36 | 2 ES | 2020-14 | 3 ES-South   | 3 | 2 | 0        | 0        |  |
| 37 | 2 ES | 2020-14 | 3 ES-South   | 3 | 3 | 0        | 0        |  |
| 38 | 2 ES | 2020-14 | 3 ES-South   | 3 | 4 | 0        | 0        |  |
| 39 | 2 ES | 2020-14 | 3 ES-South   | 3 | 5 | 0        | 0        |  |
| 40 | 2 ES | 2020-14 | 3 ES-South   | 3 | 5 | 0        | 0        |  |
| 41 | 2 ES | 2020-14 | 4 ES-Center  | 1 | 1 | #####    | #####    |  |
| 42 | 2 ES | 2020-14 | 4 ES-Center  | 1 | 2 | 1.865972 | 1.048417 |  |
| 43 | 2 ES | 2020-14 | 4 ES-Center  | 1 | 3 | #####    | #####    |  |
| 44 | 2 ES | 2020-14 | 4 ES-Center  | 1 | 4 | 1.074221 | #####    |  |
| 45 | 2 ES | 2020-14 | 4 ES-Center  | 1 | 5 | 0        | 0        |  |
| 46 | 2 ES | 2020-14 | 4 ES-Center  | 2 | 1 | #####    | #####    |  |
| 47 | 2 ES | 2020-14 | 4 ES-Center  | 2 | 2 | 1.608696 | 1.158196 |  |
| 48 | 2 ES | 2020-14 | 4 ES-Center  | 2 | 3 | 0.25     | #####    |  |
| 49 | 2 ES | 2020-14 | 4 ES-Center  | 2 | 4 | 1.25     | #####    |  |
| 50 | 2 ES | 2020-14 | 4 ES-Center  | 2 | 5 | 0        | 0        |  |
| 51 | 2 ES | 2020-14 | 4 ES-Center  | 3 | 1 | #####    | #####    |  |
| 52 | 2 ES | 2020-14 | 4 ES-Center  | 3 | 2 | 2.25     | 1.948739 |  |
| 53 | 2 ES | 2020-14 | 4 ES-Center  | 3 | 3 | #####    | #####    |  |
| 54 | 2 ES | 2020-14 | 4 ES-Center  | 3 | 4 | 0.875    | #####    |  |
| 55 | 2 ES | 2020-14 | 4 ES-Center  | 3 | 5 | 0        | 0        |  |
| 56 | 2 ES | 2020-14 | 4 ES-East    | 1 | 1 | #####    | #####    |  |
| 57 | 2 ES | 2020-14 | 4 ES-East    | 1 | 2 | 1.635513 | #####    |  |
| 58 | 2 ES | 2020-14 | 4 ES-East    | 1 | 3 | 1.659764 | #####    |  |
| 59 | 2 ES | 2020-14 | 4 ES-East    | 1 | 4 | #####    | #####    |  |
| 60 | 2 ES | 2020-14 | 4 ES-East    | 1 | 4 | #####    | #####    |  |

|    |      |         |              |   |   |          |          |  |
|----|------|---------|--------------|---|---|----------|----------|--|
| 1  |      |         |              |   |   |          |          |  |
| 2  |      |         |              |   |   |          |          |  |
| 3  | 2 ES | 2020-14 | 4 ES-East    | 1 | 5 | #####    | #####    |  |
| 4  | 2 ES | 2020-14 | 4 ES-East    | 2 | 1 | #####    | #####    |  |
| 5  | 2 ES | 2020-14 | 4 ES-East    | 2 | 2 | 1.6      | #####    |  |
| 6  | 2 ES | 2020-14 | 4 ES-East    | 2 | 3 | 1.641509 | #####    |  |
| 7  | 2 ES | 2020-14 | 4 ES-East    | 2 | 4 | 0.34375  | #####    |  |
| 8  | 2 ES | 2020-14 | 4 ES-East    | 2 | 5 | #####    | #####    |  |
| 9  | 2 ES | 2020-14 | 4 ES-East    | 3 | 1 | 1.158129 | #####    |  |
| 10 | 2 ES | 2020-14 | 4 ES-East    | 3 | 2 | 1.666667 | 1.571495 |  |
| 11 | 2 ES | 2020-14 | 4 ES-East    | 3 | 3 | 1.6875   | 1.204657 |  |
| 12 | 2 ES | 2020-14 | 4 ES-East    | 3 | 4 | 1.068966 | #####    |  |
| 13 | 2 ES | 2020-14 | 4 ES-East    | 3 | 5 | 0        | 0        |  |
| 14 | 2 ES | 2020-14 | 4 ES-Island  | 1 | 1 | #####    | #####    |  |
| 15 | 2 ES | 2020-14 | 4 ES-Island  | 1 | 2 | 0        | 0        |  |
| 16 | 2 ES | 2020-14 | 4 ES-Island  | 1 | 3 | 1.049898 | #####    |  |
| 17 | 2 ES | 2020-14 | 4 ES-Island  | 1 | 4 | #####    | #####    |  |
| 18 | 2 ES | 2020-14 | 4 ES-Island  | 1 | 5 | #####    | #####    |  |
| 19 | 2 ES | 2020-14 | 4 ES-Island  | 2 | 1 | #####    | #####    |  |
| 20 | 2 ES | 2020-14 | 4 ES-Island  | 2 | 2 | 0        | 0        |  |
| 21 | 2 ES | 2020-14 | 4 ES-Island  | 2 | 3 | #####    | #####    |  |
| 22 | 2 ES | 2020-14 | 4 ES-Island  | 2 | 4 | #####    | #####    |  |
| 23 | 2 ES | 2020-14 | 4 ES-Island  | 2 | 5 | #####    | #####    |  |
| 24 | 2 ES | 2020-14 | 4 ES-Island  | 2 | 1 | #####    | #####    |  |
| 25 | 2 ES | 2020-14 | 4 ES-Island  | 3 | 2 | 0        | 0        |  |
| 26 | 2 ES | 2020-14 | 4 ES-Island  | 3 | 3 | 1.769231 | 1.077869 |  |
| 27 | 2 ES | 2020-14 | 4 ES-Island  | 3 | 4 | #####    | #####    |  |
| 28 | 2 ES | 2020-14 | 4 ES-Island  | 3 | 5 | 0        | 0        |  |
| 29 | 2 ES | 2020-14 | 4 ES-Madrid  | 1 | 1 | #####    | #####    |  |
| 30 | 2 ES | 2020-14 | 4 ES-Madrid  | 1 | 2 | 1.522611 | 1.204419 |  |
| 31 | 2 ES | 2020-14 | 4 ES-Madrid  | 1 | 3 | 1.688536 | #####    |  |
| 32 | 2 ES | 2020-14 | 4 ES-Madrid  | 1 | 4 | #####    | #####    |  |
| 33 | 2 ES | 2020-14 | 4 ES-Madrid  | 1 | 5 | 0        | 0        |  |
| 34 | 2 ES | 2020-14 | 4 ES-Madrid  | 1 | 1 | #####    | #####    |  |
| 35 | 2 ES | 2020-14 | 4 ES-Madrid  | 2 | 2 | #####    | #####    |  |
| 36 | 2 ES | 2020-14 | 4 ES-Madrid  | 2 | 3 | #####    | #####    |  |
| 37 | 2 ES | 2020-14 | 4 ES-Madrid  | 2 | 4 | #####    | #####    |  |
| 38 | 2 ES | 2020-14 | 4 ES-Madrid  | 2 | 5 | 0        | 0        |  |
| 39 | 2 ES | 2020-14 | 4 ES-Madrid  | 2 | 1 | 1.521148 | #####    |  |
| 40 | 2 ES | 2020-14 | 4 ES-Madrid  | 3 | 2 | 3        | 2.683532 |  |
| 41 | 2 ES | 2020-14 | 4 ES-Madrid  | 3 | 3 | 2.785714 | 1.100146 |  |
| 42 | 2 ES | 2020-14 | 4 ES-Madrid  | 3 | 4 | 0        | 0        |  |
| 43 | 2 ES | 2020-14 | 4 ES-Madrid  | 3 | 5 | 0        | 0        |  |
| 44 | 2 ES | 2020-14 | 4 ES-Northea | 1 | 1 | #####    | #####    |  |
| 45 | 2 ES | 2020-14 | 4 ES-Northea | 1 | 2 | #####    | #####    |  |
| 46 | 2 ES | 2020-14 | 4 ES-Northea | 1 | 3 | #####    | #####    |  |
| 47 | 2 ES | 2020-14 | 4 ES-Northea | 1 | 4 | #####    | #####    |  |
| 48 | 2 ES | 2020-14 | 4 ES-Northea | 1 | 5 | #####    | #####    |  |
| 49 | 2 ES | 2020-14 | 4 ES-Northea | 1 | 1 | #####    | #####    |  |
| 50 | 2 ES | 2020-14 | 4 ES-Northea | 2 | 2 | 0.375    | #####    |  |
| 51 | 2 ES | 2020-14 | 4 ES-Northea | 2 | 3 | #####    | #####    |  |
| 52 | 2 ES | 2020-14 | 4 ES-Northea | 2 | 4 | #####    | #####    |  |
| 53 | 2 ES | 2020-14 | 4 ES-Northea | 2 | 5 | #####    | #####    |  |
| 54 | 2 ES | 2020-14 | 4 ES-Northea | 3 | 1 | #####    | #####    |  |
| 55 | 2 ES | 2020-14 | 4 ES-Northea | 3 | 2 | 0        | 0        |  |
| 56 | 2 ES | 2020-14 | 4 ES-Northea | 3 | 3 | 0.375    | #####    |  |
| 57 | 2 ES | 2020-14 | 4 ES-Northea | 3 | 4 | #####    | #####    |  |
| 58 | 2 ES | 2020-14 | 4 ES-Northea | 3 | 5 | 0        | 0        |  |
| 59 | 2 ES | 2020-14 | 4 ES-Northea | 3 | 1 | #####    | #####    |  |
| 60 | 2 ES | 2020-14 | 4 ES-Northea | 3 | 2 | 0        | 0        |  |

|    |      |         |              |   |   |          |       |  |
|----|------|---------|--------------|---|---|----------|-------|--|
| 1  |      |         |              |   |   |          |       |  |
| 2  |      |         |              |   |   |          |       |  |
| 3  | 2 ES | 2020-14 | 4 ES-Northw  | 1 | 1 | #####    | ##### |  |
| 4  | 2 ES | 2020-14 | 4 ES-Northw  | 1 | 2 | #####    | ##### |  |
| 5  | 2 ES | 2020-14 | 4 ES-Northw  | 1 | 3 | #####    | ##### |  |
| 6  | 2 ES | 2020-14 | 4 ES-Northw  | 1 | 4 | 1.10413  | ##### |  |
| 7  | 2 ES | 2020-14 | 4 ES-Northw  | 1 | 5 | 0        | 0     |  |
| 8  | 2 ES | 2020-14 | 4 ES-Northw  | 2 | 1 | 1.165099 | ##### |  |
| 9  | 2 ES | 2020-14 | 4 ES-Northw  | 2 | 2 | 1        | ##### |  |
| 10 | 2 ES | 2020-14 | 4 ES-Northw  | 2 | 3 | 1.621622 | ##### |  |
| 11 | 2 ES | 2020-14 | 4 ES-Northw  | 2 | 4 | 1.68254  | ##### |  |
| 12 | 2 ES | 2020-14 | 4 ES-Northw  | 2 | 5 | 0        | 0     |  |
| 13 | 2 ES | 2020-14 | 4 ES-Northw  | 3 | 1 | #####    | ##### |  |
| 14 | 2 ES | 2020-14 | 4 ES-Northw  | 3 | 2 | 0        | 0     |  |
| 15 | 2 ES | 2020-14 | 4 ES-Northw  | 3 | 3 | #####    | ##### |  |
| 16 | 2 ES | 2020-14 | 4 ES-Northw  | 3 | 4 | #####    | ##### |  |
| 17 | 2 ES | 2020-14 | 4 ES-Northw  | 3 | 5 | 0        | 0     |  |
| 18 | 2 ES | 2020-14 | 4 ES-Overall | 1 | 1 | #####    | ##### |  |
| 19 | 2 ES | 2020-14 | 4 ES-Overall | 1 | 2 | 1.029068 | ##### |  |
| 20 | 2 ES | 2020-14 | 4 ES-Overall | 1 | 3 | 1.227249 | ##### |  |
| 21 | 2 ES | 2020-14 | 4 ES-Overall | 1 | 4 | #####    | ##### |  |
| 22 | 2 ES | 2020-14 | 4 ES-Overall | 1 | 5 | #####    | ##### |  |
| 23 | 2 ES | 2020-14 | 4 ES-Overall | 2 | 1 | #####    | ##### |  |
| 24 | 2 ES | 2020-14 | 4 ES-Overall | 2 | 2 | #####    | ##### |  |
| 25 | 2 ES | 2020-14 | 4 ES-Overall | 2 | 3 | 1.07719  | ##### |  |
| 26 | 2 ES | 2020-14 | 4 ES-Overall | 2 | 4 | #####    | ##### |  |
| 27 | 2 ES | 2020-14 | 4 ES-Overall | 2 | 5 | #####    | ##### |  |
| 28 | 2 ES | 2020-14 | 4 ES-Overall | 3 | 1 | #####    | ##### |  |
| 29 | 2 ES | 2020-14 | 4 ES-Overall | 3 | 2 | 1.183647 | ##### |  |
| 30 | 2 ES | 2020-14 | 4 ES-Overall | 3 | 3 | 1.387831 | ##### |  |
| 31 | 2 ES | 2020-14 | 4 ES-Overall | 3 | 4 | #####    | ##### |  |
| 32 | 2 ES | 2020-14 | 4 ES-Overall | 3 | 5 | 0        | 0     |  |
| 33 | 2 ES | 2020-14 | 4 ES-South   | 1 | 1 | #####    | ##### |  |
| 34 | 2 ES | 2020-14 | 4 ES-South   | 1 | 2 | #####    | ##### |  |
| 35 | 2 ES | 2020-14 | 4 ES-South   | 1 | 3 | 1.363036 | ##### |  |
| 36 | 2 ES | 2020-14 | 4 ES-South   | 1 | 4 | 1.11288  | ##### |  |
| 37 | 2 ES | 2020-14 | 4 ES-South   | 1 | 5 | #####    | ##### |  |
| 38 | 2 ES | 2020-14 | 4 ES-South   | 2 | 1 | #####    | ##### |  |
| 39 | 2 ES | 2020-14 | 4 ES-South   | 2 | 2 | #####    | ##### |  |
| 40 | 2 ES | 2020-14 | 4 ES-South   | 2 | 3 | 1.101124 | ##### |  |
| 41 | 2 ES | 2020-14 | 4 ES-South   | 2 | 4 | #####    | ##### |  |
| 42 | 2 ES | 2020-14 | 4 ES-South   | 2 | 5 | 0.04     | ##### |  |
| 43 | 2 ES | 2020-14 | 4 ES-South   | 3 | 1 | 1.011096 | ##### |  |
| 44 | 2 ES | 2020-14 | 4 ES-South   | 3 | 2 | 0        | 0     |  |
| 45 | 2 ES | 2020-14 | 4 ES-South   | 3 | 3 | 1.619048 | ##### |  |
| 46 | 2 ES | 2020-14 | 4 ES-South   | 3 | 4 | 1.4      | ##### |  |
| 47 | 2 ES | 2020-14 | 4 ES-South   | 3 | 5 | 0        | 0     |  |
| 48 | 2 ES | 2020-14 | 5 ES-Center  | 1 | 1 | #####    | ##### |  |
| 49 | 2 ES | 2020-14 | 5 ES-Center  | 1 | 2 | #####    | ##### |  |
| 50 | 2 ES | 2020-14 | 5 ES-Center  | 1 | 3 | #####    | ##### |  |
| 51 | 2 ES | 2020-14 | 5 ES-Center  | 1 | 4 | #####    | ##### |  |
| 52 | 2 ES | 2020-14 | 5 ES-Center  | 1 | 5 | #####    | ##### |  |
| 53 | 2 ES | 2020-14 | 5 ES-Center  | 2 | 1 | #####    | ##### |  |
| 54 | 2 ES | 2020-14 | 5 ES-Center  | 2 | 2 | #####    | ##### |  |
| 55 | 2 ES | 2020-14 | 5 ES-Center  | 2 | 3 | #####    | ##### |  |
| 56 | 2 ES | 2020-14 | 5 ES-Center  | 2 | 4 | #####    | ##### |  |
| 57 | 2 ES | 2020-14 | 5 ES-Center  | 2 | 5 | #####    | ##### |  |
| 58 | 2 ES | 2020-14 | 5 ES-Center  | 2 | 1 | #####    | ##### |  |
| 59 | 2 ES | 2020-14 | 5 ES-Center  | 3 | 1 | #####    | ##### |  |
| 60 | 2 ES | 2020-14 | 5 ES-Center  | 3 | 1 | #####    | ##### |  |

|    |      |         |             |   |   |          |          |
|----|------|---------|-------------|---|---|----------|----------|
| 1  |      |         |             |   |   |          |          |
| 2  |      |         |             |   |   |          |          |
| 3  | 2 ES | 2020-14 | 5 ES-Center | 3 | 2 | 1.333333 | 1.088764 |
| 4  | 2 ES | 2020-14 | 5 ES-Center | 3 | 3 | #####    | #####    |
| 5  | 2 ES | 2020-14 | 5 ES-Center | 3 | 4 | #####    | #####    |
| 6  | 2 ES | 2020-14 | 5 ES-Center | 3 | 5 | 0.75     | #####    |
| 7  | 2 ES | 2020-14 | 5 ES-East   | 1 | 1 | #####    | #####    |
| 8  | 2 ES | 2020-14 | 5 ES-East   | 1 | 2 | #####    | #####    |
| 9  | 2 ES | 2020-14 | 5 ES-East   | 1 | 3 | #####    | #####    |
| 10 | 2 ES | 2020-14 | 5 ES-East   | 1 | 4 | #####    | #####    |
| 11 | 2 ES | 2020-14 | 5 ES-East   | 1 | 5 | #####    | #####    |
| 12 | 2 ES | 2020-14 | 5 ES-East   | 2 | 1 | #####    | #####    |
| 13 | 2 ES | 2020-14 | 5 ES-East   | 2 | 2 | 0.64     | #####    |
| 14 | 2 ES | 2020-14 | 5 ES-East   | 2 | 3 | #####    | #####    |
| 15 | 2 ES | 2020-14 | 5 ES-East   | 2 | 4 | #####    | #####    |
| 16 | 2 ES | 2020-14 | 5 ES-East   | 2 | 5 | 0.6      | #####    |
| 17 | 2 ES | 2020-14 | 5 ES-East   | 3 | 1 | #####    | #####    |
| 18 | 2 ES | 2020-14 | 5 ES-East   | 3 | 2 | 0.2      | #####    |
| 19 | 2 ES | 2020-14 | 5 ES-East   | 3 | 3 | #####    | #####    |
| 20 | 2 ES | 2020-14 | 5 ES-East   | 3 | 4 | #####    | #####    |
| 21 | 2 ES | 2020-14 | 5 ES-East   | 3 | 5 | #####    | #####    |
| 22 | 2 ES | 2020-14 | 5 ES-East   | 3 | 5 | #####    | #####    |
| 23 | 2 ES | 2020-14 | 5 ES-Island | 1 | 1 | #####    | #####    |
| 24 | 2 ES | 2020-14 | 5 ES-Island | 1 | 2 | #####    | #####    |
| 25 | 2 ES | 2020-14 | 5 ES-Island | 1 | 3 | #####    | #####    |
| 26 | 2 ES | 2020-14 | 5 ES-Island | 1 | 4 | #####    | #####    |
| 27 | 2 ES | 2020-14 | 5 ES-Island | 1 | 5 | #####    | #####    |
| 28 | 2 ES | 2020-14 | 5 ES-Island | 2 | 1 | #####    | #####    |
| 29 | 2 ES | 2020-14 | 5 ES-Island | 2 | 2 | #####    | #####    |
| 30 | 2 ES | 2020-14 | 5 ES-Island | 2 | 3 | #####    | #####    |
| 31 | 2 ES | 2020-14 | 5 ES-Island | 2 | 4 | #####    | #####    |
| 32 | 2 ES | 2020-14 | 5 ES-Island | 2 | 5 | #####    | #####    |
| 33 | 2 ES | 2020-14 | 5 ES-Island | 3 | 1 | #####    | #####    |
| 34 | 2 ES | 2020-14 | 5 ES-Island | 3 | 2 | 0        | 0        |
| 35 | 2 ES | 2020-14 | 5 ES-Island | 3 | 3 | #####    | #####    |
| 36 | 2 ES | 2020-14 | 5 ES-Island | 3 | 4 | #####    | #####    |
| 37 | 2 ES | 2020-14 | 5 ES-Island | 3 | 5 | #####    | #####    |
| 38 | 2 ES | 2020-14 | 5 ES-Madrid | 1 | 1 | #####    | #####    |
| 39 | 2 ES | 2020-14 | 5 ES-Madrid | 1 | 2 | #####    | #####    |
| 40 | 2 ES | 2020-14 | 5 ES-Madrid | 1 | 3 | #####    | #####    |
| 41 | 2 ES | 2020-14 | 5 ES-Madrid | 1 | 4 | #####    | #####    |
| 42 | 2 ES | 2020-14 | 5 ES-Madrid | 1 | 5 | #####    | #####    |
| 43 | 2 ES | 2020-14 | 5 ES-Madrid | 2 | 1 | #####    | #####    |
| 44 | 2 ES | 2020-14 | 5 ES-Madrid | 2 | 2 | #####    | #####    |
| 45 | 2 ES | 2020-14 | 5 ES-Madrid | 2 | 3 | #####    | #####    |
| 46 | 2 ES | 2020-14 | 5 ES-Madrid | 2 | 4 | #####    | #####    |
| 47 | 2 ES | 2020-14 | 5 ES-Madrid | 2 | 5 | #####    | #####    |
| 48 | 2 ES | 2020-14 | 5 ES-Madrid | 3 | 1 | #####    | #####    |
| 49 | 2 ES | 2020-14 | 5 ES-Madrid | 3 | 2 | 0.25     | #####    |
| 50 | 2 ES | 2020-14 | 5 ES-Madrid | 3 | 3 | 0.56     | #####    |
| 51 | 2 ES | 2020-14 | 5 ES-Madrid | 3 | 4 | #####    | #####    |
| 52 | 2 ES | 2020-14 | 5 ES-Madrid | 3 | 5 | 0.875    | #####    |
| 53 | 2 ES | 2020-14 | 5 ES-Northe | 1 | 1 | #####    | #####    |
| 54 | 2 ES | 2020-14 | 5 ES-Northe | 1 | 2 | #####    | #####    |
| 55 | 2 ES | 2020-14 | 5 ES-Northe | 1 | 3 | #####    | #####    |
| 56 | 2 ES | 2020-14 | 5 ES-Northe | 1 | 4 | #####    | #####    |
| 57 | 2 ES | 2020-14 | 5 ES-Northe | 1 | 5 | 1.14158  | #####    |
| 58 | 2 ES | 2020-14 | 5 ES-Northe | 2 | 1 | #####    | #####    |
| 59 | 2 ES | 2020-14 | 5 ES-Northe | 2 | 2 | 0.125    | #####    |
| 60 | 2 ES | 2020-14 | 5 ES-Northe | 2 | 2 | 0.125    | #####    |



|    |      |         |              |   |   |          |       |
|----|------|---------|--------------|---|---|----------|-------|
| 1  |      |         |              |   |   |          |       |
| 2  |      |         |              |   |   |          |       |
| 3  | 2 ES | 2020-14 | 5 ES-Northea | 2 | 3 | #####    | ##### |
| 4  | 2 ES | 2020-14 | 5 ES-Northea | 2 | 4 | #####    | ##### |
| 5  | 2 ES | 2020-14 | 5 ES-Northea | 2 | 5 | #####    | ##### |
| 6  | 2 ES | 2020-14 | 5 ES-Northea | 3 | 1 | #####    | ##### |
| 7  | 2 ES | 2020-14 | 5 ES-Northea | 3 | 2 | 0.5      | ##### |
| 8  | 2 ES | 2020-14 | 5 ES-Northea | 3 | 3 | #####    | ##### |
| 9  | 2 ES | 2020-14 | 5 ES-Northea | 3 | 4 | 1        | ##### |
| 10 | 2 ES | 2020-14 | 5 ES-Northea | 3 | 5 | 1.777778 | ##### |
| 11 | 2 ES | 2020-14 | 5 ES-Northw  | 1 | 1 | #####    | ##### |
| 12 | 2 ES | 2020-14 | 5 ES-Northw  | 1 | 2 | #####    | ##### |
| 13 | 2 ES | 2020-14 | 5 ES-Northw  | 1 | 3 | #####    | ##### |
| 14 | 2 ES | 2020-14 | 5 ES-Northw  | 1 | 4 | #####    | ##### |
| 15 | 2 ES | 2020-14 | 5 ES-Northw  | 1 | 5 | #####    | ##### |
| 16 | 2 ES | 2020-14 | 5 ES-Northw  | 2 | 1 | #####    | ##### |
| 17 | 2 ES | 2020-14 | 5 ES-Northw  | 2 | 2 | 0.4      | ##### |
| 18 | 2 ES | 2020-14 | 5 ES-Northw  | 2 | 3 | #####    | ##### |
| 19 | 2 ES | 2020-14 | 5 ES-Northw  | 2 | 4 | #####    | ##### |
| 20 | 2 ES | 2020-14 | 5 ES-Northw  | 2 | 5 | #####    | ##### |
| 21 | 2 ES | 2020-14 | 5 ES-Northw  | 3 | 1 | #####    | ##### |
| 22 | 2 ES | 2020-14 | 5 ES-Northw  | 3 | 2 | #####    | ##### |
| 23 | 2 ES | 2020-14 | 5 ES-Northw  | 3 | 3 | #####    | ##### |
| 24 | 2 ES | 2020-14 | 5 ES-Northw  | 3 | 4 | #####    | ##### |
| 25 | 2 ES | 2020-14 | 5 ES-Northw  | 3 | 5 | 0.5      | ##### |
| 26 | 2 ES | 2020-14 | 5 ES-Overall | 1 | 1 | #####    | ##### |
| 27 | 2 ES | 2020-14 | 5 ES-Overall | 1 | 2 | #####    | ##### |
| 28 | 2 ES | 2020-14 | 5 ES-Overall | 1 | 3 | #####    | ##### |
| 29 | 2 ES | 2020-14 | 5 ES-Overall | 1 | 4 | #####    | ##### |
| 30 | 2 ES | 2020-14 | 5 ES-Overall | 1 | 5 | #####    | ##### |
| 31 | 2 ES | 2020-14 | 5 ES-Overall | 2 | 1 | #####    | ##### |
| 32 | 2 ES | 2020-14 | 5 ES-Overall | 2 | 2 | #####    | ##### |
| 33 | 2 ES | 2020-14 | 5 ES-Overall | 2 | 3 | #####    | ##### |
| 34 | 2 ES | 2020-14 | 5 ES-Overall | 2 | 4 | #####    | ##### |
| 35 | 2 ES | 2020-14 | 5 ES-Overall | 2 | 5 | #####    | ##### |
| 36 | 2 ES | 2020-14 | 5 ES-Overall | 2 | 5 | #####    | ##### |
| 37 | 2 ES | 2020-14 | 5 ES-Overall | 3 | 1 | #####    | ##### |
| 38 | 2 ES | 2020-14 | 5 ES-Overall | 3 | 2 | #####    | ##### |
| 39 | 2 ES | 2020-14 | 5 ES-Overall | 3 | 3 | #####    | ##### |
| 40 | 2 ES | 2020-14 | 5 ES-Overall | 3 | 4 | #####    | ##### |
| 41 | 2 ES | 2020-14 | 5 ES-Overall | 3 | 5 | #####    | ##### |
| 42 | 2 ES | 2020-14 | 5 ES-South   | 1 | 1 | #####    | ##### |
| 43 | 2 ES | 2020-14 | 5 ES-South   | 1 | 2 | #####    | ##### |
| 44 | 2 ES | 2020-14 | 5 ES-South   | 1 | 3 | #####    | ##### |
| 45 | 2 ES | 2020-14 | 5 ES-South   | 1 | 4 | #####    | ##### |
| 46 | 2 ES | 2020-14 | 5 ES-South   | 1 | 5 | #####    | ##### |
| 47 | 2 ES | 2020-14 | 5 ES-South   | 2 | 1 | #####    | ##### |
| 48 | 2 ES | 2020-14 | 5 ES-South   | 2 | 2 | #####    | ##### |
| 49 | 2 ES | 2020-14 | 5 ES-South   | 2 | 3 | #####    | ##### |
| 50 | 2 ES | 2020-14 | 5 ES-South   | 2 | 4 | #####    | ##### |
| 51 | 2 ES | 2020-14 | 5 ES-South   | 2 | 5 | 0.32     | ##### |
| 52 | 2 ES | 2020-14 | 5 ES-South   | 3 | 1 | #####    | ##### |
| 53 | 2 ES | 2020-14 | 5 ES-South   | 3 | 2 | 0.2      | ##### |
| 54 | 2 ES | 2020-14 | 5 ES-South   | 3 | 3 | #####    | ##### |
| 55 | 2 ES | 2020-14 | 5 ES-South   | 3 | 4 | #####    | ##### |
| 56 | 2 ES | 2020-14 | 5 ES-South   | 3 | 5 | 0.5      | ##### |
| 57 | 2 ES | 2020-15 | 1 ES-Center  | 1 | 1 | 3.013248 | ##### |
| 58 | 2 ES | 2020-15 | 1 ES-Center  | 1 | 2 | 3.830334 | ##### |
| 59 | 2 ES | 2020-15 | 1 ES-Center  | 1 | 3 | 4.063756 | ##### |
| 60 | 2 ES | 2020-15 | 1 ES-Center  | 1 | 3 | 4.063756 | ##### |

|    |      |         |             |   |   |          |          |  |
|----|------|---------|-------------|---|---|----------|----------|--|
| 1  |      |         |             |   |   |          |          |  |
| 2  |      |         |             |   |   |          |          |  |
| 3  | 2 ES | 2020-15 | 1 ES-Center | 1 | 4 | 3.737187 | #####    |  |
| 4  | 2 ES | 2020-15 | 1 ES-Center | 1 | 5 | 1.612296 | #####    |  |
| 5  | 2 ES | 2020-15 | 1 ES-Center | 2 | 1 | 2.547613 | #####    |  |
| 6  | 2 ES | 2020-15 | 1 ES-Center | 2 | 2 | 4        | 1.388974 |  |
| 7  | 2 ES | 2020-15 | 1 ES-Center | 2 | 3 | 3.145161 | #####    |  |
| 8  | 2 ES | 2020-15 | 1 ES-Center | 2 | 4 | 3.477612 | #####    |  |
| 9  | 2 ES | 2020-15 | 1 ES-Center | 2 | 5 | 1.166667 | #####    |  |
| 10 | 2 ES | 2020-15 | 1 ES-Center | 3 | 1 | 3.589656 | #####    |  |
| 11 | 2 ES | 2020-15 | 1 ES-Center | 3 | 2 | 3.5      | #####    |  |
| 12 | 2 ES | 2020-15 | 1 ES-Center | 3 | 3 | 5.235294 | 1.835106 |  |
| 13 | 2 ES | 2020-15 | 1 ES-Center | 3 | 4 | 4        | #####    |  |
| 14 | 2 ES | 2020-15 | 1 ES-Center | 3 | 5 | 2.2      | #####    |  |
| 15 | 2 ES | 2020-15 | 1 ES-East   | 1 | 1 | 2.553967 | #####    |  |
| 16 | 2 ES | 2020-15 | 1 ES-East   | 1 | 2 | 2.226123 | #####    |  |
| 17 | 2 ES | 2020-15 | 1 ES-East   | 1 | 3 | 3.215341 | #####    |  |
| 18 | 2 ES | 2020-15 | 1 ES-East   | 1 | 4 | 2.656386 | #####    |  |
| 19 | 2 ES | 2020-15 | 1 ES-East   | 1 | 5 | 1.536112 | #####    |  |
| 20 | 2 ES | 2020-15 | 1 ES-East   | 2 | 1 | 2.611476 | #####    |  |
| 21 | 2 ES | 2020-15 | 1 ES-East   | 2 | 2 | 1.818182 | #####    |  |
| 22 | 2 ES | 2020-15 | 1 ES-East   | 2 | 3 | 3.634146 | #####    |  |
| 23 | 2 ES | 2020-15 | 1 ES-East   | 2 | 4 | 2.611111 | #####    |  |
| 24 | 2 ES | 2020-15 | 1 ES-East   | 2 | 5 | 1.266667 | #####    |  |
| 25 | 2 ES | 2020-15 | 1 ES-East   | 3 | 1 | 2.497764 | #####    |  |
| 26 | 2 ES | 2020-15 | 1 ES-East   | 3 | 2 | 2.428571 | #####    |  |
| 27 | 2 ES | 2020-15 | 1 ES-East   | 3 | 3 | 2.777778 | #####    |  |
| 28 | 2 ES | 2020-15 | 1 ES-East   | 3 | 4 | 2.704918 | #####    |  |
| 29 | 2 ES | 2020-15 | 1 ES-East   | 3 | 5 | 1.813953 | #####    |  |
| 30 | 2 ES | 2020-15 | 1 ES-Island | 1 | 1 | 3.730193 | #####    |  |
| 31 | 2 ES | 2020-15 | 1 ES-Island | 1 | 2 | 4.431005 | #####    |  |
| 32 | 2 ES | 2020-15 | 1 ES-Island | 1 | 3 | 4.564247 | #####    |  |
| 33 | 2 ES | 2020-15 | 1 ES-Island | 1 | 4 | 3.616582 | #####    |  |
| 34 | 2 ES | 2020-15 | 1 ES-Island | 1 | 5 | 1.735326 | #####    |  |
| 35 | 2 ES | 2020-15 | 1 ES-Island | 2 | 1 | 3.460901 | #####    |  |
| 36 | 2 ES | 2020-15 | 1 ES-Island | 2 | 2 | 4        | 1.374497 |  |
| 37 | 2 ES | 2020-15 | 1 ES-Island | 2 | 3 | 5.111111 | 1.57716  |  |
| 38 | 2 ES | 2020-15 | 1 ES-Island | 2 | 4 | 3.025641 | #####    |  |
| 39 | 2 ES | 2020-15 | 1 ES-Island | 2 | 5 | 1.7      | #####    |  |
| 40 | 2 ES | 2020-15 | 1 ES-Island | 3 | 1 | 4.056393 | #####    |  |
| 41 | 2 ES | 2020-15 | 1 ES-Island | 3 | 2 | 5        | 0        |  |
| 42 | 2 ES | 2020-15 | 1 ES-Island | 3 | 3 | 4.125    | #####    |  |
| 43 | 2 ES | 2020-15 | 1 ES-Island | 3 | 4 | 4.461538 | 1.445861 |  |
| 44 | 2 ES | 2020-15 | 1 ES-Island | 3 | 5 | 1.8      | #####    |  |
| 45 | 2 ES | 2020-15 | 1 ES-Madrid | 1 | 1 | 2.901879 | #####    |  |
| 46 | 2 ES | 2020-15 | 1 ES-Madrid | 1 | 2 | 4.131963 | 1.123138 |  |
| 47 | 2 ES | 2020-15 | 1 ES-Madrid | 1 | 3 | 3.046251 | #####    |  |
| 48 | 2 ES | 2020-15 | 1 ES-Madrid | 1 | 4 | 3.13335  | #####    |  |
| 49 | 2 ES | 2020-15 | 1 ES-Madrid | 1 | 5 | 1.709441 | #####    |  |
| 50 | 2 ES | 2020-15 | 1 ES-Madrid | 2 | 1 | 2.856792 | #####    |  |
| 51 | 2 ES | 2020-15 | 1 ES-Madrid | 2 | 2 | 7.375    | 2.680837 |  |
| 52 | 2 ES | 2020-15 | 1 ES-Madrid | 2 | 3 | 3.240964 | #####    |  |
| 53 | 2 ES | 2020-15 | 1 ES-Madrid | 2 | 4 | 2.936842 | #####    |  |
| 54 | 2 ES | 2020-15 | 1 ES-Madrid | 2 | 5 | 1.344828 | #####    |  |
| 55 | 2 ES | 2020-15 | 1 ES-Madrid | 3 | 1 | 2.956775 | #####    |  |
| 56 | 2 ES | 2020-15 | 1 ES-Madrid | 3 | 2 | 2.6      | #####    |  |
| 57 | 2 ES | 2020-15 | 1 ES-Madrid | 3 | 3 | 2.851852 | #####    |  |
| 58 | 2 ES | 2020-15 | 1 ES-Madrid | 3 | 4 | 3.395349 | #####    |  |
| 59 | 2 ES | 2020-15 | 1 ES-Madrid | 3 |   |          |          |  |
| 60 | 2 ES | 2020-15 | 1 ES-Madrid | 3 |   |          |          |  |

|    |      |         |              |   |   |          |          |  |
|----|------|---------|--------------|---|---|----------|----------|--|
| 1  |      |         |              |   |   |          |          |  |
| 2  |      |         |              |   |   |          |          |  |
| 3  | 2 ES | 2020-15 | 1 ES-Madrid  | 3 | 5 | 2.533333 | #####    |  |
| 4  | 2 ES | 2020-15 | 1 ES-Northea | 1 | 1 | 2.965067 | #####    |  |
| 5  | 2 ES | 2020-15 | 1 ES-Northea | 1 | 2 | 3.25027  | 1.013975 |  |
| 6  | 2 ES | 2020-15 | 1 ES-Northea | 1 | 3 | 3.026721 | #####    |  |
| 7  | 2 ES | 2020-15 | 1 ES-Northea | 1 | 4 | 3.520213 | #####    |  |
| 8  | 2 ES | 2020-15 | 1 ES-Northea | 1 | 5 | 1.968402 | #####    |  |
| 9  | 2 ES | 2020-15 | 1 ES-Northea | 2 | 1 | 2.969604 | #####    |  |
| 10 | 2 ES | 2020-15 | 1 ES-Northea | 2 | 2 | 5.363636 | 2.082281 |  |
| 11 | 2 ES | 2020-15 | 1 ES-Northea | 2 | 3 | 3.151515 | #####    |  |
| 12 | 2 ES | 2020-15 | 1 ES-Northea | 2 | 4 | 3.514706 | #####    |  |
| 13 | 2 ES | 2020-15 | 1 ES-Northea | 2 | 5 | 1.4375   | #####    |  |
| 14 | 2 ES | 2020-15 | 1 ES-Northea | 3 | 1 | 2.959686 | #####    |  |
| 15 | 2 ES | 2020-15 | 1 ES-Northea | 3 | 2 | 2.2      | #####    |  |
| 16 | 2 ES | 2020-15 | 1 ES-Northea | 3 | 3 | 2.846154 | #####    |  |
| 17 | 2 ES | 2020-15 | 1 ES-Northea | 3 | 4 | 3.526316 | #####    |  |
| 18 | 2 ES | 2020-15 | 1 ES-Northea | 3 | 5 | 2.916667 | #####    |  |
| 19 | 2 ES | 2020-15 | 1 ES-Northw  | 1 | 1 | 3.039946 | #####    |  |
| 20 | 2 ES | 2020-15 | 1 ES-Northw  | 1 | 2 | 3.114838 | #####    |  |
| 21 | 2 ES | 2020-15 | 1 ES-Northw  | 1 | 3 | 3.431759 | #####    |  |
| 22 | 2 ES | 2020-15 | 1 ES-Northw  | 1 | 4 | 3.783014 | #####    |  |
| 23 | 2 ES | 2020-15 | 1 ES-Northw  | 1 | 5 | 1.655707 | #####    |  |
| 24 | 2 ES | 2020-15 | 1 ES-Northw  | 2 | 1 | 3.013028 | #####    |  |
| 25 | 2 ES | 2020-15 | 1 ES-Northw  | 2 | 2 | 2.411765 | #####    |  |
| 26 | 2 ES | 2020-15 | 1 ES-Northw  | 2 | 3 | 4.214286 | #####    |  |
| 27 | 2 ES | 2020-15 | 1 ES-Northw  | 2 | 4 | 3.054054 | #####    |  |
| 28 | 2 ES | 2020-15 | 1 ES-Northw  | 2 | 5 | 2.0625   | #####    |  |
| 29 | 2 ES | 2020-15 | 1 ES-Northw  | 3 | 1 | 3.06952  | #####    |  |
| 30 | 2 ES | 2020-15 | 1 ES-Northw  | 3 | 2 | 6        | 0        |  |
| 31 | 2 ES | 2020-15 | 1 ES-Northw  | 3 | 3 | 2.75     | #####    |  |
| 32 | 2 ES | 2020-15 | 1 ES-Northw  | 3 | 4 | 4.5      | #####    |  |
| 33 | 2 ES | 2020-15 | 1 ES-Northw  | 3 | 5 | 1.157895 | #####    |  |
| 34 | 2 ES | 2020-15 | 1 ES-Overall | 1 | 1 | 2.879393 | #####    |  |
| 35 | 2 ES | 2020-15 | 1 ES-Overall | 1 | 2 | 3.085833 | #####    |  |
| 36 | 2 ES | 2020-15 | 1 ES-Overall | 1 | 3 | 3.417587 | #####    |  |
| 37 | 2 ES | 2020-15 | 1 ES-Overall | 1 | 4 | 3.173901 | #####    |  |
| 38 | 2 ES | 2020-15 | 1 ES-Overall | 1 | 5 | 1.662777 | #####    |  |
| 39 | 2 ES | 2020-15 | 1 ES-Overall | 2 | 1 | 2.802917 | #####    |  |
| 40 | 2 ES | 2020-15 | 1 ES-Overall | 2 | 2 | 3.524797 | #####    |  |
| 41 | 2 ES | 2020-15 | 1 ES-Overall | 2 | 3 | 3.531421 | #####    |  |
| 42 | 2 ES | 2020-15 | 1 ES-Overall | 2 | 4 | 2.99959  | #####    |  |
| 43 | 2 ES | 2020-15 | 1 ES-Overall | 2 | 5 | 1.460637 | #####    |  |
| 44 | 2 ES | 2020-15 | 1 ES-Overall | 3 | 1 | 2.965357 | #####    |  |
| 45 | 2 ES | 2020-15 | 1 ES-Overall | 3 | 2 | 2.761612 | #####    |  |
| 46 | 2 ES | 2020-15 | 1 ES-Overall | 3 | 3 | 3.289843 | #####    |  |
| 47 | 2 ES | 2020-15 | 1 ES-Overall | 3 | 4 | 3.365326 | #####    |  |
| 48 | 2 ES | 2020-15 | 1 ES-Overall | 3 | 5 | 1.943414 | #####    |  |
| 49 | 2 ES | 2020-15 | 1 ES-South   | 1 | 1 | 2.970482 | #####    |  |
| 50 | 2 ES | 2020-15 | 1 ES-South   | 1 | 2 | 2.843602 | #####    |  |
| 51 | 2 ES | 2020-15 | 1 ES-South   | 1 | 3 | 3.63018  | #####    |  |
| 52 | 2 ES | 2020-15 | 1 ES-South   | 1 | 4 | 3.017141 | #####    |  |
| 53 | 2 ES | 2020-15 | 1 ES-South   | 1 | 5 | 1.697368 | #####    |  |
| 54 | 2 ES | 2020-15 | 1 ES-South   | 2 | 1 | 2.877044 | #####    |  |
| 55 | 2 ES | 2020-15 | 1 ES-South   | 2 | 2 | 2.625    | #####    |  |
| 56 | 2 ES | 2020-15 | 1 ES-South   | 2 | 3 | 3.411111 | #####    |  |
| 57 | 2 ES | 2020-15 | 1 ES-South   | 2 | 4 | 3.011765 | #####    |  |
| 58 | 2 ES | 2020-15 | 1 ES-South   | 2 | 5 | 1.782609 | #####    |  |
| 59 | 2 ES | 2020-15 | 1 ES-South   | 2 |   |          |          |  |
| 60 | 2 ES | 2020-15 | 1 ES-South   | 2 |   |          |          |  |

1  
2  
3  
4  
5  
6  
7  
8  
9  
10  
11  
12  
13  
14  
15  
16  
17  
18  
19  
20  
21  
22  
23  
24  
25  
26  
27  
28  
29  
30  
31  
32  
33  
34  
35  
36  
37  
38  
39  
40  
41  
42  
43  
44  
45  
46  
47  
48  
49  
50  
51  
52  
53  
54  
55  
56  
57  
58  
59  
60

|      |         |             |   |   |          |       |
|------|---------|-------------|---|---|----------|-------|
| 2 ES | 2020-15 | 1 ES-South  | 3 | 1 | 3.081817 | ##### |
| 2 ES | 2020-15 | 1 ES-South  | 3 | 2 | 3        | ##### |
| 2 ES | 2020-15 | 1 ES-South  | 3 | 3 | 3.933333 | ##### |
| 2 ES | 2020-15 | 1 ES-South  | 3 | 4 | 3.022727 | ##### |
| 2 ES | 2020-15 | 1 ES-South  | 3 | 5 | 1.5625   | ##### |
| 2 ES | 2020-15 | 2 ES-Center | 1 | 1 | 1.574315 | ##### |
| 2 ES | 2020-15 | 2 ES-Center | 1 | 2 | 2.145055 | ##### |
| 2 ES | 2020-15 | 2 ES-Center | 1 | 3 | 1.719966 | ##### |
| 2 ES | 2020-15 | 2 ES-Center | 1 | 4 | 1.761068 | ##### |
| 2 ES | 2020-15 | 2 ES-Center | 1 | 5 | 1.180145 | ##### |
| 2 ES | 2020-15 | 2 ES-Center | 2 | 1 | 1.496854 | ##### |
| 2 ES | 2020-15 | 2 ES-Center | 2 | 2 | 2        | ##### |
| 2 ES | 2020-15 | 2 ES-Center | 2 | 3 | 1.884058 | ##### |
| 2 ES | 2020-15 | 2 ES-Center | 2 | 4 | 1.710526 | ##### |
| 2 ES | 2020-15 | 2 ES-Center | 2 | 5 | #####    | ##### |
| 2 ES | 2020-15 | 2 ES-Center | 3 | 1 | 1.668094 | ##### |
| 2 ES | 2020-15 | 2 ES-Center | 3 | 2 | 2.333333 | ##### |
| 2 ES | 2020-15 | 2 ES-Center | 3 | 3 | 1.5      | ##### |
| 2 ES | 2020-15 | 2 ES-Center | 3 | 4 | 1.814815 | ##### |
| 2 ES | 2020-15 | 2 ES-Center | 3 | 5 | 1.47619  | ##### |
| 2 ES | 2020-15 | 2 ES-East   | 1 | 1 | 1.596982 | ##### |
| 2 ES | 2020-15 | 2 ES-East   | 1 | 2 | 2.034142 | ##### |
| 2 ES | 2020-15 | 2 ES-East   | 1 | 3 | 1.843262 | ##### |
| 2 ES | 2020-15 | 2 ES-East   | 1 | 4 | 1.561522 | ##### |
| 2 ES | 2020-15 | 2 ES-East   | 1 | 5 | 1.023308 | ##### |
| 2 ES | 2020-15 | 2 ES-East   | 2 | 1 | 1.552982 | ##### |
| 2 ES | 2020-15 | 2 ES-East   | 2 | 2 | 1.833333 | ##### |
| 2 ES | 2020-15 | 2 ES-East   | 2 | 3 | 1.969697 | ##### |
| 2 ES | 2020-15 | 2 ES-East   | 2 | 4 | 1.473684 | ##### |
| 2 ES | 2020-15 | 2 ES-East   | 2 | 5 | #####    | ##### |
| 2 ES | 2020-15 | 2 ES-East   | 3 | 1 | 1.638684 | ##### |
| 2 ES | 2020-15 | 2 ES-East   | 3 | 2 | 2.142857 | ##### |
| 2 ES | 2020-15 | 2 ES-East   | 3 | 3 | 1.727273 | ##### |
| 2 ES | 2020-15 | 2 ES-East   | 3 | 4 | 1.65625  | ##### |
| 2 ES | 2020-15 | 2 ES-East   | 3 | 5 | 1.139535 | ##### |
| 2 ES | 2020-15 | 2 ES-Island | 1 | 1 | 1.667659 | ##### |
| 2 ES | 2020-15 | 2 ES-Island | 1 | 2 | 2.086618 | ##### |
| 2 ES | 2020-15 | 2 ES-Island | 1 | 3 | 1.93547  | ##### |
| 2 ES | 2020-15 | 2 ES-Island | 1 | 4 | 1.595632 | ##### |
| 2 ES | 2020-15 | 2 ES-Island | 1 | 5 | 0.929349 | ##### |
| 2 ES | 2020-15 | 2 ES-Island | 2 | 1 | 1.743063 | ##### |
| 2 ES | 2020-15 | 2 ES-Island | 2 | 2 | 2.142857 | ##### |
| 2 ES | 2020-15 | 2 ES-Island | 2 | 3 | 2        | ##### |
| 2 ES | 2020-15 | 2 ES-Island | 2 | 4 | 1.744681 | ##### |
| 2 ES | 2020-15 | 2 ES-Island | 2 | 5 | 1        | ##### |
| 2 ES | 2020-15 | 2 ES-Island | 3 | 1 | 1.565264 | ##### |
| 2 ES | 2020-15 | 2 ES-Island | 3 | 2 | 2        | 0     |
| 2 ES | 2020-15 | 2 ES-Island | 3 | 3 | 1.875    | ##### |
| 2 ES | 2020-15 | 2 ES-Island | 3 | 4 | 1.357143 | ##### |
| 2 ES | 2020-15 | 2 ES-Island | 3 | 5 | 0.8      | ##### |
| 2 ES | 2020-15 | 2 ES-Madrid | 1 | 1 | 1.701702 | ##### |
| 2 ES | 2020-15 | 2 ES-Madrid | 1 | 2 | 2.637126 | ##### |
| 2 ES | 2020-15 | 2 ES-Madrid | 1 | 3 | 1.67669  | ##### |
| 2 ES | 2020-15 | 2 ES-Madrid | 1 | 4 | 1.75012  | ##### |
| 2 ES | 2020-15 | 2 ES-Madrid | 1 | 5 | 1.2392   | ##### |
| 2 ES | 2020-15 | 2 ES-Madrid | 2 | 1 | 1.722787 | ##### |

|    |      |         |              |   |   |          |       |  |
|----|------|---------|--------------|---|---|----------|-------|--|
| 1  |      |         |              |   |   |          |       |  |
| 2  |      |         |              |   |   |          |       |  |
| 3  | 2 ES | 2020-15 | 2 ES-Madrid  | 2 | 2 | 2.7      | ##### |  |
| 4  | 2 ES | 2020-15 | 2 ES-Madrid  | 2 | 3 | 1.904255 | ##### |  |
| 5  | 2 ES | 2020-15 | 2 ES-Madrid  | 2 | 4 | 1.786408 | ##### |  |
| 6  | 2 ES | 2020-15 | 2 ES-Madrid  | 2 | 5 | 1.1875   | ##### |  |
| 7  | 2 ES | 2020-15 | 2 ES-Madrid  | 3 | 1 | 1.674859 | ##### |  |
| 8  | 2 ES | 2020-15 | 2 ES-Madrid  | 3 | 2 | 2.6      | ##### |  |
| 9  | 2 ES | 2020-15 | 2 ES-Madrid  | 3 | 3 | 1.428571 | ##### |  |
| 10 | 2 ES | 2020-15 | 2 ES-Madrid  | 3 | 4 | 1.702128 | ##### |  |
| 11 | 2 ES | 2020-15 | 2 ES-Madrid  | 3 | 5 | 1.352941 | ##### |  |
| 12 | 2 ES | 2020-15 | 2 ES-Northea | 1 | 1 | 1.726342 | ##### |  |
| 13 | 2 ES | 2020-15 | 2 ES-Northea | 1 | 2 | 2.081591 | ##### |  |
| 14 | 2 ES | 2020-15 | 2 ES-Northea | 1 | 3 | 1.929759 | ##### |  |
| 15 | 2 ES | 2020-15 | 2 ES-Northea | 1 | 4 | 1.839928 | ##### |  |
| 16 | 2 ES | 2020-15 | 2 ES-Northea | 1 | 5 | 1.087124 | ##### |  |
| 17 | 2 ES | 2020-15 | 2 ES-Northea | 2 | 1 | 1.733583 | ##### |  |
| 18 | 2 ES | 2020-15 | 2 ES-Northea | 2 | 2 | 3        | ##### |  |
| 19 | 2 ES | 2020-15 | 2 ES-Northea | 2 | 3 | 2.065789 | ##### |  |
| 20 | 2 ES | 2020-15 | 2 ES-Northea | 2 | 4 | 1.676471 | ##### |  |
| 21 | 2 ES | 2020-15 | 2 ES-Northea | 2 | 5 | 1        | ##### |  |
| 22 | 2 ES | 2020-15 | 2 ES-Northea | 3 | 1 | 1.71844  | ##### |  |
| 23 | 2 ES | 2020-15 | 2 ES-Northea | 3 | 2 | 1.666667 | ##### |  |
| 24 | 2 ES | 2020-15 | 2 ES-Northea | 3 | 3 | 1.733333 | ##### |  |
| 25 | 2 ES | 2020-15 | 2 ES-Northea | 3 | 4 | 2        | ##### |  |
| 26 | 2 ES | 2020-15 | 2 ES-Northea | 3 | 5 | 1.230769 | ##### |  |
| 27 | 2 ES | 2020-15 | 2 ES-Northw  | 1 | 1 | 1.620122 | ##### |  |
| 28 | 2 ES | 2020-15 | 2 ES-Northw  | 1 | 2 | 2.322575 | ##### |  |
| 29 | 2 ES | 2020-15 | 2 ES-Northw  | 1 | 3 | 2.014521 | ##### |  |
| 30 | 2 ES | 2020-15 | 2 ES-Northw  | 1 | 4 | 1.680716 | ##### |  |
| 31 | 2 ES | 2020-15 | 2 ES-Northw  | 1 | 5 | #####    | ##### |  |
| 32 | 2 ES | 2020-15 | 2 ES-Northw  | 2 | 1 | 1.601367 | ##### |  |
| 33 | 2 ES | 2020-15 | 2 ES-Northw  | 2 | 2 | 2.166667 | ##### |  |
| 34 | 2 ES | 2020-15 | 2 ES-Northw  | 2 | 3 | 2.12     | ##### |  |
| 35 | 2 ES | 2020-15 | 2 ES-Northw  | 2 | 4 | 1.625    | ##### |  |
| 36 | 2 ES | 2020-15 | 2 ES-Northw  | 2 | 5 | #####    | ##### |  |
| 37 | 2 ES | 2020-15 | 2 ES-Northw  | 3 | 1 | 1.641877 | ##### |  |
| 38 | 2 ES | 2020-15 | 2 ES-Northw  | 3 | 2 | 3        | 0     |  |
| 39 | 2 ES | 2020-15 | 2 ES-Northw  | 3 | 3 | 1.92     | ##### |  |
| 40 | 2 ES | 2020-15 | 2 ES-Northw  | 3 | 4 | 1.736842 | ##### |  |
| 41 | 2 ES | 2020-15 | 2 ES-Northw  | 3 | 5 | 1        | ##### |  |
| 42 | 2 ES | 2020-15 | 2 ES-Overall | 1 | 1 | 1.660708 | ##### |  |
| 43 | 2 ES | 2020-15 | 2 ES-Overall | 1 | 2 | 2.250171 | ##### |  |
| 44 | 2 ES | 2020-15 | 2 ES-Overall | 1 | 3 | 1.878785 | ##### |  |
| 45 | 2 ES | 2020-15 | 2 ES-Overall | 1 | 4 | 1.674794 | ##### |  |
| 46 | 2 ES | 2020-15 | 2 ES-Overall | 1 | 5 | 1.080603 | ##### |  |
| 47 | 2 ES | 2020-15 | 2 ES-Overall | 2 | 1 | 1.628877 | ##### |  |
| 48 | 2 ES | 2020-15 | 2 ES-Overall | 2 | 2 | 2.261418 | ##### |  |
| 49 | 2 ES | 2020-15 | 2 ES-Overall | 2 | 3 | 1.977798 | ##### |  |
| 50 | 2 ES | 2020-15 | 2 ES-Overall | 2 | 4 | 1.63159  | ##### |  |
| 51 | 2 ES | 2020-15 | 2 ES-Overall | 2 | 5 | #####    | ##### |  |
| 52 | 2 ES | 2020-15 | 2 ES-Overall | 3 | 1 | 1.696059 | ##### |  |
| 53 | 2 ES | 2020-15 | 2 ES-Overall | 3 | 2 | 2.241606 | ##### |  |
| 54 | 2 ES | 2020-15 | 2 ES-Overall | 3 | 3 | 1.773237 | ##### |  |
| 55 | 2 ES | 2020-15 | 2 ES-Overall | 3 | 4 | 1.722367 | ##### |  |
| 56 | 2 ES | 2020-15 | 2 ES-Overall | 3 | 5 | 1.206314 | ##### |  |
| 57 | 2 ES | 2020-15 | 2 ES-South   | 1 | 1 | 1.7662   | ##### |  |
| 58 | 2 ES | 2020-15 | 2 ES-South   | 1 | 2 | 2.518018 | ##### |  |
| 59 |      |         |              |   |   |          |       |  |
| 60 |      |         |              |   |   |          |       |  |

1  
2  
3  
4  
5  
6  
7  
8  
9  
10  
11  
12  
13  
14  
15  
16  
17  
18  
19  
20  
21  
22  
23  
24  
25  
26  
27  
28  
29  
30  
31  
32  
33  
34  
35  
36  
37  
38  
39  
40  
41  
42  
43  
44  
45  
46  
47  
48  
49  
50  
51  
52  
53  
54  
55  
56  
57  
58  
59  
60

|      |         |             |   |   |          |       |   |  |
|------|---------|-------------|---|---|----------|-------|---|--|
| 2 ES | 2020-15 | 2 ES-South  | 1 | 3 | 2.037401 | ##### |   |  |
| 2 ES | 2020-15 | 2 ES-South  | 1 | 4 | 1.65306  | ##### |   |  |
| 2 ES | 2020-15 | 2 ES-South  | 1 | 5 | 1.023576 | ##### |   |  |
| 2 ES | 2020-15 | 2 ES-South  | 2 | 1 | 1.685808 | ##### |   |  |
| 2 ES | 2020-15 | 2 ES-South  | 2 | 2 | 2.333333 | ##### |   |  |
| 2 ES | 2020-15 | 2 ES-South  | 2 | 3 | 1.979167 | ##### |   |  |
| 2 ES | 2020-15 | 2 ES-South  | 2 | 4 | 1.626374 | ##### |   |  |
| 2 ES | 2020-15 | 2 ES-South  | 2 | 5 | 1        | ##### |   |  |
| 2 ES | 2020-15 | 2 ES-South  | 3 | 1 | 1.858183 | ##### |   |  |
| 2 ES | 2020-15 | 2 ES-South  | 3 | 2 | 2.666667 | ##### |   |  |
| 2 ES | 2020-15 | 2 ES-South  | 3 | 3 | 2.105263 | ##### |   |  |
| 2 ES | 2020-15 | 2 ES-South  | 3 | 4 | 1.680851 | ##### |   |  |
| 2 ES | 2020-15 | 2 ES-South  | 3 | 5 | 1.0625   | ##### |   |  |
| 2 ES | 2020-15 | 3 ES-Center | 1 | 1 | 0        |       | 0 |  |
| 2 ES | 2020-15 | 3 ES-Center | 1 | 2 | 0        |       | 0 |  |
| 2 ES | 2020-15 | 3 ES-Center | 1 | 3 | 0        |       | 0 |  |
| 2 ES | 2020-15 | 3 ES-Center | 1 | 4 | 0        |       | 0 |  |
| 2 ES | 2020-15 | 3 ES-Center | 1 | 5 | 0        |       | 0 |  |
| 2 ES | 2020-15 | 3 ES-Center | 2 | 1 | 0        |       | 0 |  |
| 2 ES | 2020-15 | 3 ES-Center | 2 | 2 | 0        |       | 0 |  |
| 2 ES | 2020-15 | 3 ES-Center | 2 | 3 | 0        |       | 0 |  |
| 2 ES | 2020-15 | 3 ES-Center | 2 | 4 | 0        |       | 0 |  |
| 2 ES | 2020-15 | 3 ES-Center | 2 | 5 | 0        |       | 0 |  |
| 2 ES | 2020-15 | 3 ES-Center | 3 | 1 | 0        |       | 0 |  |
| 2 ES | 2020-15 | 3 ES-Center | 3 | 2 | 0        |       | 0 |  |
| 2 ES | 2020-15 | 3 ES-Center | 3 | 3 | 0        |       | 0 |  |
| 2 ES | 2020-15 | 3 ES-Center | 3 | 4 | 0        |       | 0 |  |
| 2 ES | 2020-15 | 3 ES-Center | 3 | 5 | 0        |       | 0 |  |
| 2 ES | 2020-15 | 3 ES-East   | 1 | 1 | 0        |       | 0 |  |
| 2 ES | 2020-15 | 3 ES-East   | 1 | 2 | 0        |       | 0 |  |
| 2 ES | 2020-15 | 3 ES-East   | 1 | 3 | 0        |       | 0 |  |
| 2 ES | 2020-15 | 3 ES-East   | 1 | 4 | 0        |       | 0 |  |
| 2 ES | 2020-15 | 3 ES-East   | 1 | 5 | 0        |       | 0 |  |
| 2 ES | 2020-15 | 3 ES-East   | 2 | 1 | 0        |       | 0 |  |
| 2 ES | 2020-15 | 3 ES-East   | 2 | 2 | 0        |       | 0 |  |
| 2 ES | 2020-15 | 3 ES-East   | 2 | 3 | 0        |       | 0 |  |
| 2 ES | 2020-15 | 3 ES-East   | 2 | 4 | 0        |       | 0 |  |
| 2 ES | 2020-15 | 3 ES-East   | 2 | 5 | 0        |       | 0 |  |
| 2 ES | 2020-15 | 3 ES-East   | 3 | 1 | 0        |       | 0 |  |
| 2 ES | 2020-15 | 3 ES-East   | 3 | 2 | 0        |       | 0 |  |
| 2 ES | 2020-15 | 3 ES-East   | 3 | 3 | 0        |       | 0 |  |
| 2 ES | 2020-15 | 3 ES-East   | 3 | 4 | 0        |       | 0 |  |
| 2 ES | 2020-15 | 3 ES-East   | 3 | 5 | 0        |       | 0 |  |
| 2 ES | 2020-15 | 3 ES-Island | 1 | 1 | 0        |       | 0 |  |
| 2 ES | 2020-15 | 3 ES-Island | 1 | 2 | 0        |       | 0 |  |
| 2 ES | 2020-15 | 3 ES-Island | 1 | 3 | 0        |       | 0 |  |
| 2 ES | 2020-15 | 3 ES-Island | 1 | 4 | 0        |       | 0 |  |
| 2 ES | 2020-15 | 3 ES-Island | 1 | 5 | 0        |       | 0 |  |
| 2 ES | 2020-15 | 3 ES-Island | 2 | 1 | 0        |       | 0 |  |
| 2 ES | 2020-15 | 3 ES-Island | 2 | 2 | 0        |       | 0 |  |
| 2 ES | 2020-15 | 3 ES-Island | 2 | 3 | 0        |       | 0 |  |
| 2 ES | 2020-15 | 3 ES-Island | 2 | 4 | 0        |       | 0 |  |
| 2 ES | 2020-15 | 3 ES-Island | 2 | 5 | 0        |       | 0 |  |
| 2 ES | 2020-15 | 3 ES-Island | 3 | 1 | 0        |       | 0 |  |
| 2 ES | 2020-15 | 3 ES-Island | 3 | 2 | 0        |       | 0 |  |
| 2 ES | 2020-15 | 3 ES-Island | 3 | 3 | 0        |       | 0 |  |

|    |      |         |              |   |   |   |   |
|----|------|---------|--------------|---|---|---|---|
| 1  |      |         |              |   |   |   |   |
| 2  |      |         |              |   |   |   |   |
| 3  | 2 ES | 2020-15 | 3 ES-Island  | 3 | 4 | 0 | 0 |
| 4  | 2 ES | 2020-15 | 3 ES-Island  | 3 | 5 | 0 | 0 |
| 5  | 2 ES | 2020-15 | 3 ES-Madrid  | 1 | 1 | 0 | 0 |
| 6  | 2 ES | 2020-15 | 3 ES-Madrid  | 1 | 2 | 0 | 0 |
| 7  | 2 ES | 2020-15 | 3 ES-Madrid  | 1 | 3 | 0 | 0 |
| 8  | 2 ES | 2020-15 | 3 ES-Madrid  | 1 | 4 | 0 | 0 |
| 9  | 2 ES | 2020-15 | 3 ES-Madrid  | 1 | 5 | 0 | 0 |
| 10 | 2 ES | 2020-15 | 3 ES-Madrid  | 2 | 1 | 0 | 0 |
| 11 | 2 ES | 2020-15 | 3 ES-Madrid  | 2 | 2 | 0 | 0 |
| 12 | 2 ES | 2020-15 | 3 ES-Madrid  | 2 | 3 | 0 | 0 |
| 13 | 2 ES | 2020-15 | 3 ES-Madrid  | 2 | 4 | 0 | 0 |
| 14 | 2 ES | 2020-15 | 3 ES-Madrid  | 2 | 5 | 0 | 0 |
| 15 | 2 ES | 2020-15 | 3 ES-Madrid  | 3 | 1 | 0 | 0 |
| 16 | 2 ES | 2020-15 | 3 ES-Madrid  | 3 | 2 | 0 | 0 |
| 17 | 2 ES | 2020-15 | 3 ES-Madrid  | 3 | 3 | 0 | 0 |
| 18 | 2 ES | 2020-15 | 3 ES-Madrid  | 3 | 4 | 0 | 0 |
| 19 | 2 ES | 2020-15 | 3 ES-Madrid  | 3 | 5 | 0 | 0 |
| 20 | 2 ES | 2020-15 | 3 ES-Northea | 1 | 1 | 0 | 0 |
| 21 | 2 ES | 2020-15 | 3 ES-Northea | 1 | 2 | 0 | 0 |
| 22 | 2 ES | 2020-15 | 3 ES-Northea | 1 | 3 | 0 | 0 |
| 23 | 2 ES | 2020-15 | 3 ES-Northea | 1 | 4 | 0 | 0 |
| 24 | 2 ES | 2020-15 | 3 ES-Northea | 1 | 5 | 0 | 0 |
| 25 | 2 ES | 2020-15 | 3 ES-Northea | 2 | 1 | 0 | 0 |
| 26 | 2 ES | 2020-15 | 3 ES-Northea | 2 | 2 | 0 | 0 |
| 27 | 2 ES | 2020-15 | 3 ES-Northea | 2 | 3 | 0 | 0 |
| 28 | 2 ES | 2020-15 | 3 ES-Northea | 2 | 4 | 0 | 0 |
| 29 | 2 ES | 2020-15 | 3 ES-Northea | 2 | 5 | 0 | 0 |
| 30 | 2 ES | 2020-15 | 3 ES-Northea | 3 | 1 | 0 | 0 |
| 31 | 2 ES | 2020-15 | 3 ES-Northea | 3 | 2 | 0 | 0 |
| 32 | 2 ES | 2020-15 | 3 ES-Northea | 3 | 3 | 0 | 0 |
| 33 | 2 ES | 2020-15 | 3 ES-Northea | 3 | 4 | 0 | 0 |
| 34 | 2 ES | 2020-15 | 3 ES-Northea | 3 | 5 | 0 | 0 |
| 35 | 2 ES | 2020-15 | 3 ES-Northw  | 1 | 1 | 0 | 0 |
| 36 | 2 ES | 2020-15 | 3 ES-Northw  | 1 | 2 | 0 | 0 |
| 37 | 2 ES | 2020-15 | 3 ES-Northw  | 1 | 3 | 0 | 0 |
| 38 | 2 ES | 2020-15 | 3 ES-Northw  | 1 | 4 | 0 | 0 |
| 39 | 2 ES | 2020-15 | 3 ES-Northw  | 1 | 5 | 0 | 0 |
| 40 | 2 ES | 2020-15 | 3 ES-Northw  | 2 | 1 | 0 | 0 |
| 41 | 2 ES | 2020-15 | 3 ES-Northw  | 2 | 2 | 0 | 0 |
| 42 | 2 ES | 2020-15 | 3 ES-Northw  | 2 | 3 | 0 | 0 |
| 43 | 2 ES | 2020-15 | 3 ES-Northw  | 2 | 4 | 0 | 0 |
| 44 | 2 ES | 2020-15 | 3 ES-Northw  | 2 | 5 | 0 | 0 |
| 45 | 2 ES | 2020-15 | 3 ES-Northw  | 3 | 1 | 0 | 0 |
| 46 | 2 ES | 2020-15 | 3 ES-Northw  | 3 | 2 | 0 | 0 |
| 47 | 2 ES | 2020-15 | 3 ES-Northw  | 3 | 3 | 0 | 0 |
| 48 | 2 ES | 2020-15 | 3 ES-Northw  | 3 | 4 | 0 | 0 |
| 49 | 2 ES | 2020-15 | 3 ES-Northw  | 3 | 5 | 0 | 0 |
| 50 | 2 ES | 2020-15 | 3 ES-Overall | 1 | 1 | 0 | 0 |
| 51 | 2 ES | 2020-15 | 3 ES-Overall | 1 | 2 | 0 | 0 |
| 52 | 2 ES | 2020-15 | 3 ES-Overall | 1 | 3 | 0 | 0 |
| 53 | 2 ES | 2020-15 | 3 ES-Overall | 1 | 4 | 0 | 0 |
| 54 | 2 ES | 2020-15 | 3 ES-Overall | 1 | 5 | 0 | 0 |
| 55 | 2 ES | 2020-15 | 3 ES-Overall | 2 | 1 | 0 | 0 |
| 56 | 2 ES | 2020-15 | 3 ES-Overall | 2 | 2 | 0 | 0 |
| 57 | 2 ES | 2020-15 | 3 ES-Overall | 2 | 3 | 0 | 0 |
| 58 | 2 ES | 2020-15 | 3 ES-Overall | 2 | 4 | 0 | 0 |
| 59 | 2 ES | 2020-15 | 3 ES-Overall | 2 | 5 | 0 | 0 |
| 60 | 2 ES | 2020-15 | 3 ES-Overall | 2 | 4 | 0 | 0 |

|    |      |         |              |   |   |          |          |  |
|----|------|---------|--------------|---|---|----------|----------|--|
| 1  |      |         |              |   |   |          |          |  |
| 2  |      |         |              |   |   |          |          |  |
| 3  | 2 ES | 2020-15 | 3 ES-Overall | 2 | 5 | 0        | 0        |  |
| 4  | 2 ES | 2020-15 | 3 ES-Overall | 3 | 1 | 0        | 0        |  |
| 5  | 2 ES | 2020-15 | 3 ES-Overall | 3 | 2 | 0        | 0        |  |
| 6  | 2 ES | 2020-15 | 3 ES-Overall | 3 | 3 | 0        | 0        |  |
| 7  | 2 ES | 2020-15 | 3 ES-Overall | 3 | 4 | 0        | 0        |  |
| 8  | 2 ES | 2020-15 | 3 ES-Overall | 3 | 5 | 0        | 0        |  |
| 9  | 2 ES | 2020-15 | 3 ES-South   | 1 | 1 | 0        | 0        |  |
| 10 | 2 ES | 2020-15 | 3 ES-South   | 1 | 2 | 0        | 0        |  |
| 11 | 2 ES | 2020-15 | 3 ES-South   | 1 | 3 | 0        | 0        |  |
| 12 | 2 ES | 2020-15 | 3 ES-South   | 1 | 4 | 0        | 0        |  |
| 13 | 2 ES | 2020-15 | 3 ES-South   | 1 | 5 | 0        | 0        |  |
| 14 | 2 ES | 2020-15 | 3 ES-South   | 2 | 1 | 0        | 0        |  |
| 15 | 2 ES | 2020-15 | 3 ES-South   | 2 | 2 | 0        | 0        |  |
| 16 | 2 ES | 2020-15 | 3 ES-South   | 2 | 3 | 0        | 0        |  |
| 17 | 2 ES | 2020-15 | 3 ES-South   | 2 | 4 | 0        | 0        |  |
| 18 | 2 ES | 2020-15 | 3 ES-South   | 2 | 5 | 0        | 0        |  |
| 19 | 2 ES | 2020-15 | 3 ES-South   | 3 | 1 | 0        | 0        |  |
| 20 | 2 ES | 2020-15 | 3 ES-South   | 3 | 2 | 0        | 0        |  |
| 21 | 2 ES | 2020-15 | 3 ES-South   | 3 | 3 | 0        | 0        |  |
| 22 | 2 ES | 2020-15 | 3 ES-South   | 3 | 4 | 0        | 0        |  |
| 23 | 2 ES | 2020-15 | 3 ES-South   | 3 | 5 | 0        | 0        |  |
| 24 | 2 ES | 2020-15 | 4 ES-Center  | 1 | 1 | 1.027708 | #####    |  |
| 25 | 2 ES | 2020-15 | 4 ES-Center  | 1 | 2 | #####    | #####    |  |
| 26 | 2 ES | 2020-15 | 4 ES-Center  | 1 | 3 | 2.06544  | #####    |  |
| 27 | 2 ES | 2020-15 | 4 ES-Center  | 1 | 4 | 1.550941 | #####    |  |
| 28 | 2 ES | 2020-15 | 4 ES-Center  | 1 | 5 | 0        | 0        |  |
| 29 | 2 ES | 2020-15 | 4 ES-Center  | 2 | 1 | #####    | #####    |  |
| 30 | 2 ES | 2020-15 | 4 ES-Center  | 2 | 2 | 1.375    | 1.205164 |  |
| 31 | 2 ES | 2020-15 | 4 ES-Center  | 2 | 3 | 1.102941 | #####    |  |
| 32 | 2 ES | 2020-15 | 4 ES-Center  | 2 | 4 | 1.565789 | #####    |  |
| 33 | 2 ES | 2020-15 | 4 ES-Center  | 2 | 5 | 0        | 0        |  |
| 34 | 2 ES | 2020-15 | 4 ES-Center  | 3 | 1 | 1.217016 | #####    |  |
| 35 | 2 ES | 2020-15 | 4 ES-Center  | 3 | 2 | 0        | 0        |  |
| 36 | 2 ES | 2020-15 | 4 ES-Center  | 3 | 3 | 3.411765 | 1.580868 |  |
| 37 | 2 ES | 2020-15 | 4 ES-Center  | 3 | 4 | 1.535714 | #####    |  |
| 38 | 2 ES | 2020-15 | 4 ES-Center  | 3 | 5 | 0        | 0        |  |
| 39 | 2 ES | 2020-15 | 4 ES-East    | 1 | 1 | #####    | #####    |  |
| 40 | 2 ES | 2020-15 | 4 ES-East    | 1 | 2 | 0        | 0        |  |
| 41 | 2 ES | 2020-15 | 4 ES-East    | 1 | 3 | 1.193804 | #####    |  |
| 42 | 2 ES | 2020-15 | 4 ES-East    | 1 | 4 | #####    | #####    |  |
| 43 | 2 ES | 2020-15 | 4 ES-East    | 1 | 5 | 0        | 0        |  |
| 44 | 2 ES | 2020-15 | 4 ES-East    | 2 | 1 | #####    | #####    |  |
| 45 | 2 ES | 2020-15 | 4 ES-East    | 2 | 2 | 0        | 0        |  |
| 46 | 2 ES | 2020-15 | 4 ES-East    | 2 | 3 | 1.307692 | #####    |  |
| 47 | 2 ES | 2020-15 | 4 ES-East    | 2 | 4 | #####    | #####    |  |
| 48 | 2 ES | 2020-15 | 4 ES-East    | 2 | 5 | 0        | 0        |  |
| 49 | 2 ES | 2020-15 | 4 ES-East    | 3 | 1 | #####    | #####    |  |
| 50 | 2 ES | 2020-15 | 4 ES-East    | 3 | 2 | 0        | 0        |  |
| 51 | 2 ES | 2020-15 | 4 ES-East    | 3 | 3 | 1.090909 | #####    |  |
| 52 | 2 ES | 2020-15 | 4 ES-East    | 3 | 4 | #####    | #####    |  |
| 53 | 2 ES | 2020-15 | 4 ES-East    | 3 | 5 | 0        | 0        |  |
| 54 | 2 ES | 2020-15 | 4 ES-Island  | 1 | 1 | 1.089696 | #####    |  |
| 55 | 2 ES | 2020-15 | 4 ES-Island  | 1 | 2 | 0        | 0        |  |
| 56 | 2 ES | 2020-15 | 4 ES-Island  | 1 | 3 | 1.570681 | #####    |  |
| 57 | 2 ES | 2020-15 | 4 ES-Island  | 1 | 4 | 1.492549 | #####    |  |
| 58 | 2 ES | 2020-15 | 4 ES-Island  | 1 | 5 | 0        | 0        |  |
| 59 | 2 ES | 2020-15 | 4 ES-Island  | 1 | 5 | 0        | 0        |  |
| 60 | 2 ES | 2020-15 | 4 ES-Island  | 1 | 5 | 0        | 0        |  |



|    |      |         |              |   |   |          |          |
|----|------|---------|--------------|---|---|----------|----------|
| 1  |      |         |              |   |   |          |          |
| 2  |      |         |              |   |   |          |          |
| 3  | 2 ES | 2020-15 | 4 ES-Island  | 2 | 1 | #####    | #####    |
| 4  | 2 ES | 2020-15 | 4 ES-Island  | 2 | 2 | 0        | 0        |
| 5  | 2 ES | 2020-15 | 4 ES-Island  | 2 | 3 | 2.15     | 1.446294 |
| 6  | 2 ES | 2020-15 | 4 ES-Island  | 2 | 4 | #####    | #####    |
| 7  | 2 ES | 2020-15 | 4 ES-Island  | 2 | 5 | 0        | 0        |
| 8  | 2 ES | 2020-15 | 4 ES-Island  | 3 | 1 | 1.232743 | #####    |
| 9  | 2 ES | 2020-15 | 4 ES-Island  | 3 | 2 | 0        | 0        |
| 10 | 2 ES | 2020-15 | 4 ES-Island  | 3 | 3 | 1.111111 | 1.047663 |
| 11 | 2 ES | 2020-15 | 4 ES-Island  | 3 | 4 | 2.466667 | 1.146567 |
| 12 | 2 ES | 2020-15 | 4 ES-Island  | 3 | 5 | 0        | 0        |
| 13 | 2 ES | 2020-15 | 4 ES-Madrid  | 1 | 1 | #####    | #####    |
| 14 | 2 ES | 2020-15 | 4 ES-Madrid  | 1 | 2 | 1.856298 | 1.111706 |
| 15 | 2 ES | 2020-15 | 4 ES-Madrid  | 1 | 3 | #####    | #####    |
| 16 | 2 ES | 2020-15 | 4 ES-Madrid  | 1 | 4 | #####    | #####    |
| 17 | 2 ES | 2020-15 | 4 ES-Madrid  | 1 | 5 | #####    | #####    |
| 18 | 2 ES | 2020-15 | 4 ES-Madrid  | 2 | 1 | #####    | #####    |
| 19 | 2 ES | 2020-15 | 4 ES-Madrid  | 2 | 2 | 5        | 2.449718 |
| 20 | 2 ES | 2020-15 | 4 ES-Madrid  | 2 | 3 | 1.11828  | #####    |
| 21 | 2 ES | 2020-15 | 4 ES-Madrid  | 2 | 4 | #####    | #####    |
| 22 | 2 ES | 2020-15 | 4 ES-Madrid  | 2 | 5 | 0.03125  | #####    |
| 23 | 2 ES | 2020-15 | 4 ES-Madrid  | 3 | 1 | #####    | #####    |
| 24 | 2 ES | 2020-15 | 4 ES-Madrid  | 3 | 2 | 0        | 0        |
| 25 | 2 ES | 2020-15 | 4 ES-Madrid  | 3 | 3 | #####    | #####    |
| 26 | 2 ES | 2020-15 | 4 ES-Madrid  | 3 | 4 | 1.173913 | #####    |
| 27 | 2 ES | 2020-15 | 4 ES-Madrid  | 3 | 5 | #####    | #####    |
| 28 | 2 ES | 2020-15 | 4 ES-Northea | 1 | 1 | #####    | #####    |
| 29 | 2 ES | 2020-15 | 4 ES-Northea | 1 | 2 | #####    | #####    |
| 30 | 2 ES | 2020-15 | 4 ES-Northea | 1 | 3 | 1.064833 | #####    |
| 31 | 2 ES | 2020-15 | 4 ES-Northea | 1 | 4 | #####    | #####    |
| 32 | 2 ES | 2020-15 | 4 ES-Northea | 1 | 5 | 0        | 0        |
| 33 | 2 ES | 2020-15 | 4 ES-Northea | 2 | 1 | #####    | #####    |
| 34 | 2 ES | 2020-15 | 4 ES-Northea | 2 | 2 | 2.083333 | 1.994826 |
| 35 | 2 ES | 2020-15 | 4 ES-Northea | 2 | 3 | 1.202703 | #####    |
| 36 | 2 ES | 2020-15 | 4 ES-Northea | 2 | 4 | 1.101449 | #####    |
| 37 | 2 ES | 2020-15 | 4 ES-Northea | 2 | 5 | 0        | 0        |
| 38 | 2 ES | 2020-15 | 4 ES-Northea | 3 | 1 | #####    | #####    |
| 39 | 2 ES | 2020-15 | 4 ES-Northea | 3 | 2 | 0        | 0        |
| 40 | 2 ES | 2020-15 | 4 ES-Northea | 3 | 3 | #####    | #####    |
| 41 | 2 ES | 2020-15 | 4 ES-Northea | 3 | 4 | #####    | #####    |
| 42 | 2 ES | 2020-15 | 4 ES-Northea | 3 | 5 | 0        | 0        |
| 43 | 2 ES | 2020-15 | 4 ES-Northw  | 1 | 1 | #####    | #####    |
| 44 | 2 ES | 2020-15 | 4 ES-Northw  | 1 | 2 | 0        | 0        |
| 45 | 2 ES | 2020-15 | 4 ES-Northw  | 1 | 3 | #####    | #####    |
| 46 | 2 ES | 2020-15 | 4 ES-Northw  | 1 | 4 | 1.578052 | #####    |
| 47 | 2 ES | 2020-15 | 4 ES-Northw  | 1 | 5 | #####    | #####    |
| 48 | 2 ES | 2020-15 | 4 ES-Northw  | 2 | 1 | #####    | #####    |
| 49 | 2 ES | 2020-15 | 4 ES-Northw  | 2 | 2 | 0        | 0        |
| 50 | 2 ES | 2020-15 | 4 ES-Northw  | 2 | 3 | 1.878378 | #####    |
| 51 | 2 ES | 2020-15 | 4 ES-Northw  | 2 | 4 | 1.320513 | #####    |
| 52 | 2 ES | 2020-15 | 4 ES-Northw  | 2 | 5 | 0.1      | #####    |
| 53 | 2 ES | 2020-15 | 4 ES-Northw  | 3 | 1 | #####    | #####    |
| 54 | 2 ES | 2020-15 | 4 ES-Northw  | 3 | 2 | 0        | 0        |
| 55 | 2 ES | 2020-15 | 4 ES-Northw  | 3 | 3 | 0.125    | #####    |
| 56 | 2 ES | 2020-15 | 4 ES-Northw  | 3 | 4 | 1.837838 | #####    |
| 57 | 2 ES | 2020-15 | 4 ES-Northw  | 3 | 5 | 0        | 0        |
| 58 | 2 ES | 2020-15 | 4 ES-Overall | 1 | 1 | #####    | #####    |
| 59 | 2 ES | 2020-15 | 4 ES-Overall | 1 |   |          |          |
| 60 | 2 ES | 2020-15 | 4 ES-Overall | 1 |   |          |          |

1  
2  
3  
4  
5  
6  
7  
8  
9  
10  
11  
12  
13  
14  
15  
16  
17  
18  
19  
20  
21  
22  
23  
24  
25  
26  
27  
28  
29  
30  
31  
32  
33  
34  
35  
36  
37  
38  
39  
40  
41  
42  
43  
44  
45  
46  
47  
48  
49  
50  
51  
52  
53  
54  
55  
56  
57  
58  
59  
60

|      |         |              |   |   |          |       |
|------|---------|--------------|---|---|----------|-------|
| 2 ES | 2020-15 | 4 ES-Overall | 1 | 2 | #####    | ##### |
| 2 ES | 2020-15 | 4 ES-Overall | 1 | 3 | 1.202957 | ##### |
| 2 ES | 2020-15 | 4 ES-Overall | 1 | 4 | 1.001881 | ##### |
| 2 ES | 2020-15 | 4 ES-Overall | 1 | 5 | #####    | ##### |
| 2 ES | 2020-15 | 4 ES-Overall | 2 | 1 | #####    | ##### |
| 2 ES | 2020-15 | 4 ES-Overall | 2 | 2 | #####    | ##### |
| 2 ES | 2020-15 | 4 ES-Overall | 2 | 3 | 1.205847 | ##### |
| 2 ES | 2020-15 | 4 ES-Overall | 2 | 4 | #####    | ##### |
| 2 ES | 2020-15 | 4 ES-Overall | 2 | 5 | #####    | ##### |
| 2 ES | 2020-15 | 4 ES-Overall | 3 | 1 | #####    | ##### |
| 2 ES | 2020-15 | 4 ES-Overall | 3 | 2 | 0        | 0     |
| 2 ES | 2020-15 | 4 ES-Overall | 3 | 3 | 1.199891 | ##### |
| 2 ES | 2020-15 | 4 ES-Overall | 3 | 4 | 1.046505 | ##### |
| 2 ES | 2020-15 | 4 ES-Overall | 3 | 5 | #####    | ##### |
| 2 ES | 2020-15 | 4 ES-South   | 1 | 1 | #####    | ##### |
| 2 ES | 2020-15 | 4 ES-South   | 1 | 2 | 0        | 0     |
| 2 ES | 2020-15 | 4 ES-South   | 1 | 3 | 1.105456 | ##### |
| 2 ES | 2020-15 | 4 ES-South   | 1 | 4 | 0.982451 | ##### |
| 2 ES | 2020-15 | 4 ES-South   | 1 | 5 | 0        | 0     |
| 2 ES | 2020-15 | 4 ES-South   | 2 | 1 | #####    | ##### |
| 2 ES | 2020-15 | 4 ES-South   | 2 | 2 | 0        | 0     |
| 2 ES | 2020-15 | 4 ES-South   | 2 | 3 | #####    | ##### |
| 2 ES | 2020-15 | 4 ES-South   | 2 | 4 | 1.064516 | ##### |
| 2 ES | 2020-15 | 4 ES-South   | 2 | 5 | 0        | 0     |
| 2 ES | 2020-15 | 4 ES-South   | 3 | 1 | #####    | ##### |
| 2 ES | 2020-15 | 4 ES-South   | 3 | 2 | 0        | 0     |
| 2 ES | 2020-15 | 4 ES-South   | 3 | 3 | 1.473684 | ##### |
| 2 ES | 2020-15 | 4 ES-South   | 3 | 4 | #####    | ##### |
| 2 ES | 2020-15 | 4 ES-South   | 3 | 5 | 0        | 0     |
| 2 ES | 2020-15 | 5 ES-Center  | 1 | 1 | #####    | ##### |
| 2 ES | 2020-15 | 5 ES-Center  | 1 | 2 | #####    | ##### |
| 2 ES | 2020-15 | 5 ES-Center  | 1 | 3 | #####    | ##### |
| 2 ES | 2020-15 | 5 ES-Center  | 1 | 4 | #####    | ##### |
| 2 ES | 2020-15 | 5 ES-Center  | 1 | 5 | #####    | ##### |
| 2 ES | 2020-15 | 5 ES-Center  | 2 | 1 | #####    | ##### |
| 2 ES | 2020-15 | 5 ES-Center  | 2 | 2 | 0.5      | ##### |
| 2 ES | 2020-15 | 5 ES-Center  | 2 | 3 | #####    | ##### |
| 2 ES | 2020-15 | 5 ES-Center  | 2 | 4 | #####    | ##### |
| 2 ES | 2020-15 | 5 ES-Center  | 2 | 5 | #####    | ##### |
| 2 ES | 2020-15 | 5 ES-Center  | 3 | 1 | #####    | ##### |
| 2 ES | 2020-15 | 5 ES-Center  | 3 | 2 | 1        | ##### |
| 2 ES | 2020-15 | 5 ES-Center  | 3 | 3 | #####    | ##### |
| 2 ES | 2020-15 | 5 ES-Center  | 3 | 4 | 0.5      | ##### |
| 2 ES | 2020-15 | 5 ES-Center  | 3 | 5 | #####    | ##### |
| 2 ES | 2020-15 | 5 ES-East    | 1 | 1 | #####    | ##### |
| 2 ES | 2020-15 | 5 ES-East    | 1 | 2 | #####    | ##### |
| 2 ES | 2020-15 | 5 ES-East    | 1 | 3 | #####    | ##### |
| 2 ES | 2020-15 | 5 ES-East    | 1 | 4 | #####    | ##### |
| 2 ES | 2020-15 | 5 ES-East    | 1 | 5 | #####    | ##### |
| 2 ES | 2020-15 | 5 ES-East    | 2 | 1 | #####    | ##### |
| 2 ES | 2020-15 | 5 ES-East    | 2 | 2 | #####    | ##### |
| 2 ES | 2020-15 | 5 ES-East    | 2 | 3 | #####    | ##### |
| 2 ES | 2020-15 | 5 ES-East    | 2 | 4 | #####    | ##### |
| 2 ES | 2020-15 | 5 ES-East    | 2 | 5 | #####    | ##### |
| 2 ES | 2020-15 | 5 ES-East    | 3 | 1 | #####    | ##### |
| 2 ES | 2020-15 | 5 ES-East    | 3 | 2 | #####    | ##### |

|    |      |         |              |   |   |          |          |  |
|----|------|---------|--------------|---|---|----------|----------|--|
| 1  |      |         |              |   |   |          |          |  |
| 2  |      |         |              |   |   |          |          |  |
| 3  | 2 ES | 2020-15 | 5 ES-East    | 3 | 3 | #####    | #####    |  |
| 4  | 2 ES | 2020-15 | 5 ES-East    | 3 | 4 | 0.703125 | #####    |  |
| 5  | 2 ES | 2020-15 | 5 ES-East    | 3 | 5 | #####    | #####    |  |
| 6  | 2 ES | 2020-15 | 5 ES-Island  | 1 | 1 | 1.017707 | #####    |  |
| 7  | 2 ES | 2020-15 | 5 ES-Island  | 1 | 2 | 1.655378 | #####    |  |
| 8  | 2 ES | 2020-15 | 5 ES-Island  | 1 | 3 | #####    | #####    |  |
| 9  | 2 ES | 2020-15 | 5 ES-Island  | 1 | 4 | #####    | #####    |  |
| 10 | 2 ES | 2020-15 | 5 ES-Island  | 1 | 5 | #####    | #####    |  |
| 11 | 2 ES | 2020-15 | 5 ES-Island  | 2 | 1 | 1.03136  | #####    |  |
| 12 | 2 ES | 2020-15 | 5 ES-Island  | 2 | 2 | 1.857143 | #####    |  |
| 13 | 2 ES | 2020-15 | 5 ES-Island  | 2 | 3 | 0.9      | #####    |  |
| 14 | 2 ES | 2020-15 | 5 ES-Island  | 2 | 4 | 1        | #####    |  |
| 15 | 2 ES | 2020-15 | 5 ES-Island  | 2 | 5 | 0.7      | #####    |  |
| 16 | 2 ES | 2020-15 | 5 ES-Island  | 3 | 1 | 1.002658 | #####    |  |
| 17 | 2 ES | 2020-15 | 5 ES-Island  | 3 | 2 | 1.5      | 1.060759 |  |
| 18 | 2 ES | 2020-15 | 5 ES-Island  | 3 | 3 | 1        | #####    |  |
| 19 | 2 ES | 2020-15 | 5 ES-Island  | 3 | 4 | #####    | #####    |  |
| 20 | 2 ES | 2020-15 | 5 ES-Island  | 3 | 5 | #####    | #####    |  |
| 21 | 2 ES | 2020-15 | 5 ES-Madrid  | 1 | 1 | #####    | #####    |  |
| 22 | 2 ES | 2020-15 | 5 ES-Madrid  | 1 | 2 | #####    | #####    |  |
| 23 | 2 ES | 2020-15 | 5 ES-Madrid  | 1 | 3 | #####    | #####    |  |
| 24 | 2 ES | 2020-15 | 5 ES-Madrid  | 1 | 4 | #####    | #####    |  |
| 25 | 2 ES | 2020-15 | 5 ES-Madrid  | 1 | 5 | #####    | #####    |  |
| 26 | 2 ES | 2020-15 | 5 ES-Madrid  | 2 | 1 | #####    | #####    |  |
| 27 | 2 ES | 2020-15 | 5 ES-Madrid  | 2 | 2 | 0.1      | #####    |  |
| 28 | 2 ES | 2020-15 | 5 ES-Madrid  | 2 | 3 | #####    | #####    |  |
| 29 | 2 ES | 2020-15 | 5 ES-Madrid  | 2 | 4 | #####    | #####    |  |
| 30 | 2 ES | 2020-15 | 5 ES-Madrid  | 2 | 5 | #####    | #####    |  |
| 31 | 2 ES | 2020-15 | 5 ES-Madrid  | 3 | 1 | #####    | #####    |  |
| 32 | 2 ES | 2020-15 | 5 ES-Madrid  | 3 | 2 | 0        | 0        |  |
| 33 | 2 ES | 2020-15 | 5 ES-Madrid  | 3 | 3 | #####    | #####    |  |
| 34 | 2 ES | 2020-15 | 5 ES-Madrid  | 3 | 4 | #####    | #####    |  |
| 35 | 2 ES | 2020-15 | 5 ES-Madrid  | 3 | 5 | 1.125    | #####    |  |
| 36 | 2 ES | 2020-15 | 5 ES-Northea | 1 | 1 | #####    | #####    |  |
| 37 | 2 ES | 2020-15 | 5 ES-Northea | 1 | 2 | #####    | #####    |  |
| 38 | 2 ES | 2020-15 | 5 ES-Northea | 1 | 3 | #####    | #####    |  |
| 39 | 2 ES | 2020-15 | 5 ES-Northea | 1 | 4 | #####    | #####    |  |
| 40 | 2 ES | 2020-15 | 5 ES-Northea | 1 | 5 | #####    | #####    |  |
| 41 | 2 ES | 2020-15 | 5 ES-Northea | 2 | 1 | #####    | #####    |  |
| 42 | 2 ES | 2020-15 | 5 ES-Northea | 2 | 2 | #####    | #####    |  |
| 43 | 2 ES | 2020-15 | 5 ES-Northea | 2 | 3 | #####    | #####    |  |
| 44 | 2 ES | 2020-15 | 5 ES-Northea | 2 | 4 | #####    | #####    |  |
| 45 | 2 ES | 2020-15 | 5 ES-Northea | 2 | 5 | 0.4375   | #####    |  |
| 46 | 2 ES | 2020-15 | 5 ES-Northea | 3 | 1 | #####    | #####    |  |
| 47 | 2 ES | 2020-15 | 5 ES-Northea | 3 | 2 | 0.5      | #####    |  |
| 48 | 2 ES | 2020-15 | 5 ES-Northea | 3 | 3 | #####    | #####    |  |
| 49 | 2 ES | 2020-15 | 5 ES-Northea | 3 | 4 | #####    | #####    |  |
| 50 | 2 ES | 2020-15 | 5 ES-Northea | 3 | 5 | 1.833333 | #####    |  |
| 51 | 2 ES | 2020-15 | 5 ES-Northw  | 1 | 1 | #####    | #####    |  |
| 52 | 2 ES | 2020-15 | 5 ES-Northw  | 1 | 2 | #####    | #####    |  |
| 53 | 2 ES | 2020-15 | 5 ES-Northw  | 1 | 3 | #####    | #####    |  |
| 54 | 2 ES | 2020-15 | 5 ES-Northw  | 1 | 4 | #####    | #####    |  |
| 55 | 2 ES | 2020-15 | 5 ES-Northw  | 1 | 5 | #####    | #####    |  |
| 56 | 2 ES | 2020-15 | 5 ES-Northw  | 2 | 1 | #####    | #####    |  |
| 57 | 2 ES | 2020-15 | 5 ES-Northw  | 2 | 2 | #####    | #####    |  |
| 58 | 2 ES | 2020-15 | 5 ES-Northw  | 2 | 3 | #####    | #####    |  |
| 59 | 2 ES | 2020-15 | 5 ES-Northw  | 2 | 4 | #####    | #####    |  |
| 60 | 2 ES | 2020-15 | 5 ES-Northw  | 2 | 5 | #####    | #####    |  |

|    |      |         |               |   |   |          |          |  |
|----|------|---------|---------------|---|---|----------|----------|--|
| 1  |      |         |               |   |   |          |          |  |
| 2  |      |         |               |   |   |          |          |  |
| 3  | 2 ES | 2020-15 | 5 ES-Northw   | 2 | 4 | 0.4875   | #####    |  |
| 4  | 2 ES | 2020-15 | 5 ES-Northw   | 2 | 5 | 1.157895 | #####    |  |
| 5  | 2 ES | 2020-15 | 5 ES-Northw   | 3 | 1 | #####    | #####    |  |
| 6  | 2 ES | 2020-15 | 5 ES-Northw   | 3 | 2 | 3        | 0        |  |
| 7  | 2 ES | 2020-15 | 5 ES-Northw   | 3 | 3 | 0.64     | #####    |  |
| 8  | 2 ES | 2020-15 | 5 ES-Northw   | 3 | 4 | #####    | #####    |  |
| 9  | 2 ES | 2020-15 | 5 ES-Northw   | 3 | 5 | #####    | #####    |  |
| 10 | 2 ES | 2020-15 | 5 ES-Overall  | 1 | 1 | #####    | #####    |  |
| 11 | 2 ES | 2020-15 | 5 ES-Overall  | 1 | 2 | #####    | #####    |  |
| 12 | 2 ES | 2020-15 | 5 ES-Overall  | 1 | 3 | #####    | #####    |  |
| 13 | 2 ES | 2020-15 | 5 ES-Overall  | 1 | 4 | #####    | #####    |  |
| 14 | 2 ES | 2020-15 | 5 ES-Overall  | 1 | 5 | #####    | #####    |  |
| 15 | 2 ES | 2020-15 | 5 ES-Overall  | 2 | 1 | #####    | #####    |  |
| 16 | 2 ES | 2020-15 | 5 ES-Overall  | 2 | 2 | #####    | #####    |  |
| 17 | 2 ES | 2020-15 | 5 ES-Overall  | 2 | 3 | #####    | #####    |  |
| 18 | 2 ES | 2020-15 | 5 ES-Overall  | 2 | 4 | #####    | #####    |  |
| 19 | 2 ES | 2020-15 | 5 ES-Overall  | 2 | 5 | #####    | #####    |  |
| 20 | 2 ES | 2020-15 | 5 ES-Overall  | 3 | 1 | #####    | #####    |  |
| 21 | 2 ES | 2020-15 | 5 ES-Overall  | 3 | 2 | #####    | #####    |  |
| 22 | 2 ES | 2020-15 | 5 ES-Overall  | 3 | 3 | #####    | #####    |  |
| 23 | 2 ES | 2020-15 | 5 ES-Overall  | 3 | 4 | #####    | #####    |  |
| 24 | 2 ES | 2020-15 | 5 ES-Overall  | 3 | 5 | #####    | #####    |  |
| 25 | 2 ES | 2020-15 | 5 ES-Overall  | 3 | 5 | #####    | #####    |  |
| 26 | 2 ES | 2020-15 | 5 ES-South    | 1 | 1 | #####    | #####    |  |
| 27 | 2 ES | 2020-15 | 5 ES-South    | 1 | 2 | #####    | #####    |  |
| 28 | 2 ES | 2020-15 | 5 ES-South    | 1 | 3 | #####    | #####    |  |
| 29 | 2 ES | 2020-15 | 5 ES-South    | 1 | 4 | #####    | #####    |  |
| 30 | 2 ES | 2020-15 | 5 ES-South    | 1 | 5 | #####    | #####    |  |
| 31 | 2 ES | 2020-15 | 5 ES-South    | 2 | 1 | #####    | #####    |  |
| 32 | 2 ES | 2020-15 | 5 ES-South    | 2 | 2 | #####    | #####    |  |
| 33 | 2 ES | 2020-15 | 5 ES-South    | 2 | 3 | 0.57     | #####    |  |
| 34 | 2 ES | 2020-15 | 5 ES-South    | 2 | 4 | #####    | #####    |  |
| 35 | 2 ES | 2020-15 | 5 ES-South    | 2 | 5 | #####    | #####    |  |
| 36 | 2 ES | 2020-15 | 5 ES-South    | 3 | 1 | #####    | #####    |  |
| 37 | 2 ES | 2020-15 | 5 ES-South    | 3 | 2 | 0.25     | #####    |  |
| 38 | 2 ES | 2020-15 | 5 ES-South    | 3 | 3 | #####    | #####    |  |
| 39 | 2 ES | 2020-15 | 5 ES-South    | 3 | 4 | 0.78     | #####    |  |
| 40 | 2 ES | 2020-15 | 5 ES-South    | 3 | 5 | 0.5      | #####    |  |
| 41 | 2 FR | 2020-13 | 1 FR-Corse    | 1 | 1 | 1.337769 | 1.048361 |  |
| 42 | 2 FR | 2020-13 | 1 FR-Corse    | 1 | 2 | 3        | 0        |  |
| 43 | 2 FR | 2020-13 | 1 FR-Corse    | 1 | 5 | 0        | 0        |  |
| 44 | 2 FR | 2020-13 | 1 FR-Corse    | 2 | 1 | 1.337769 | 1.048361 |  |
| 45 | 2 FR | 2020-13 | 1 FR-Corse    | 2 | 2 | 3        | 0        |  |
| 46 | 2 FR | 2020-13 | 1 FR-Corse    | 2 | 5 | 0        | 0        |  |
| 47 | 2 FR | 2020-13 | 1 FR-Ile de F | 1 | 1 | 2.127087 | #####    |  |
| 48 | 2 FR | 2020-13 | 1 FR-Ile de F | 1 | 2 | 1.946999 | #####    |  |
| 49 | 2 FR | 2020-13 | 1 FR-Ile de F | 1 | 3 | 1.484079 | #####    |  |
| 50 | 2 FR | 2020-13 | 1 FR-Ile de F | 1 | 4 | 2.678247 | #####    |  |
| 51 | 2 FR | 2020-13 | 1 FR-Ile de F | 1 | 5 | 2.060382 | #####    |  |
| 52 | 2 FR | 2020-13 | 1 FR-Ile de F | 2 | 1 | 2.127948 | #####    |  |
| 53 | 2 FR | 2020-13 | 1 FR-Ile de F | 2 | 2 | 2        | #####    |  |
| 54 | 2 FR | 2020-13 | 1 FR-Ile de F | 2 | 3 | #####    | #####    |  |
| 55 | 2 FR | 2020-13 | 1 FR-Ile de F | 2 | 4 | 2.839506 | #####    |  |
| 56 | 2 FR | 2020-13 | 1 FR-Ile de F | 2 | 5 | 2.214286 | #####    |  |
| 57 | 2 FR | 2020-13 | 1 FR-Ile de F | 3 | 1 | 2.12623  | #####    |  |
| 58 | 2 FR | 2020-13 | 1 FR-Ile de F | 3 | 2 | 1.923077 | #####    |  |
| 59 | 2 FR | 2020-13 | 1 FR-Ile de F | 3 | 3 | 2        | #####    |  |
| 60 | 2 FR | 2020-13 | 1 FR-Ile de F | 3 | 3 | 2        | #####    |  |

|    |      |         |               |   |   |          |          |  |
|----|------|---------|---------------|---|---|----------|----------|--|
| 1  |      |         |               |   |   |          |          |  |
| 2  |      |         |               |   |   |          |          |  |
| 3  | 2 FR | 2020-13 | 1 FR-Ile de F | 3 | 4 | 2.46875  | #####    |  |
| 4  | 2 FR | 2020-13 | 1 FR-Ile de F | 3 | 5 | 1.882353 | #####    |  |
| 5  | 2 FR | 2020-13 | 1 FR-North E  | 1 | 1 | 2.550317 | #####    |  |
| 6  | 2 FR | 2020-13 | 1 FR-North E  | 1 | 2 | 2.344871 | #####    |  |
| 7  | 2 FR | 2020-13 | 1 FR-North E  | 1 | 3 | 2.541938 | #####    |  |
| 8  | 2 FR | 2020-13 | 1 FR-North E  | 1 | 4 | 3.452676 | #####    |  |
| 9  | 2 FR | 2020-13 | 1 FR-North E  | 1 | 5 | 1.146182 | #####    |  |
| 10 | 2 FR | 2020-13 | 1 FR-North E  | 2 | 1 | 2.663446 | #####    |  |
| 11 | 2 FR | 2020-13 | 1 FR-North E  | 2 | 2 | 2.043478 | #####    |  |
| 12 | 2 FR | 2020-13 | 1 FR-North E  | 2 | 3 | 2.909091 | #####    |  |
| 13 | 2 FR | 2020-13 | 1 FR-North E  | 2 | 4 | 3.597826 | #####    |  |
| 14 | 2 FR | 2020-13 | 1 FR-North E  | 2 | 5 | #####    | #####    |  |
| 15 | 2 FR | 2020-13 | 1 FR-North E  | 3 | 1 | 2.398826 | #####    |  |
| 16 | 2 FR | 2020-13 | 1 FR-North E  | 3 | 2 | 2.666667 | #####    |  |
| 17 | 2 FR | 2020-13 | 1 FR-North E  | 3 | 3 | 2.086957 | #####    |  |
| 18 | 2 FR | 2020-13 | 1 FR-North E  | 3 | 4 | 3.233333 | #####    |  |
| 19 | 2 FR | 2020-13 | 1 FR-North E  | 3 | 5 | 1.388889 | #####    |  |
| 20 | 2 FR | 2020-13 | 1 FR-Overall  | 1 | 1 | 2.266848 | #####    |  |
| 21 | 2 FR | 2020-13 | 1 FR-Overall  | 1 | 2 | 2.37085  | #####    |  |
| 22 | 2 FR | 2020-13 | 1 FR-Overall  | 1 | 3 | 2.439027 | #####    |  |
| 23 | 2 FR | 2020-13 | 1 FR-Overall  | 1 | 4 | 2.784938 | #####    |  |
| 24 | 2 FR | 2020-13 | 1 FR-Overall  | 1 | 5 | 1.38222  | #####    |  |
| 25 | 2 FR | 2020-13 | 1 FR-Overall  | 2 | 1 | 2.278554 | #####    |  |
| 26 | 2 FR | 2020-13 | 1 FR-Overall  | 2 | 2 | 2.292    | #####    |  |
| 27 | 2 FR | 2020-13 | 1 FR-Overall  | 2 | 3 | 2.53914  | #####    |  |
| 28 | 2 FR | 2020-13 | 1 FR-Overall  | 2 | 4 | 2.804099 | #####    |  |
| 29 | 2 FR | 2020-13 | 1 FR-Overall  | 2 | 5 | 1.314571 | #####    |  |
| 30 | 2 FR | 2020-13 | 1 FR-Overall  | 3 | 1 | 2.251934 | #####    |  |
| 31 | 2 FR | 2020-13 | 1 FR-Overall  | 3 | 2 | 2.433634 | #####    |  |
| 32 | 2 FR | 2020-13 | 1 FR-Overall  | 3 | 3 | 2.300213 | #####    |  |
| 33 | 2 FR | 2020-13 | 1 FR-Overall  | 3 | 4 | 2.758404 | #####    |  |
| 34 | 2 FR | 2020-13 | 1 FR-Overall  | 3 | 5 | 1.469403 | #####    |  |
| 35 | 2 FR | 2020-13 | 1 FR-South E  | 1 | 1 | 2.212183 | #####    |  |
| 36 | 2 FR | 2020-13 | 1 FR-South E  | 1 | 2 | 2.119975 | #####    |  |
| 37 | 2 FR | 2020-13 | 1 FR-South E  | 1 | 3 | 2.807598 | #####    |  |
| 38 | 2 FR | 2020-13 | 1 FR-South E  | 1 | 4 | 2.45229  | #####    |  |
| 39 | 2 FR | 2020-13 | 1 FR-South E  | 1 | 5 | 1.440912 | #####    |  |
| 40 | 2 FR | 2020-13 | 1 FR-South E  | 2 | 1 | 2.063696 | #####    |  |
| 41 | 2 FR | 2020-13 | 1 FR-South E  | 2 | 2 | 2.52     | #####    |  |
| 42 | 2 FR | 2020-13 | 1 FR-South E  | 2 | 3 | 2.5      | #####    |  |
| 43 | 2 FR | 2020-13 | 1 FR-South E  | 2 | 4 | 2.304348 | #####    |  |
| 44 | 2 FR | 2020-13 | 1 FR-South E  | 2 | 5 | 1.3      | #####    |  |
| 45 | 2 FR | 2020-13 | 1 FR-South E  | 3 | 1 | 2.420275 | #####    |  |
| 46 | 2 FR | 2020-13 | 1 FR-South E  | 3 | 2 | 1.875    | #####    |  |
| 47 | 2 FR | 2020-13 | 1 FR-South E  | 3 | 3 | 3.352941 | 1.401925 |  |
| 48 | 2 FR | 2020-13 | 1 FR-South E  | 3 | 4 | 2.648649 | #####    |  |
| 49 | 2 FR | 2020-13 | 1 FR-South E  | 3 | 5 | 1.7      | #####    |  |
| 50 | 2 FR | 2020-13 | 1 FR-South V  | 1 | 1 | 2.000521 | #####    |  |
| 51 | 2 FR | 2020-13 | 1 FR-South V  | 1 | 2 | 2.153593 | #####    |  |
| 52 | 2 FR | 2020-13 | 1 FR-South V  | 1 | 3 | 2.526229 | #####    |  |
| 53 | 2 FR | 2020-13 | 1 FR-South V  | 1 | 4 | 2.521153 | #####    |  |
| 54 | 2 FR | 2020-13 | 1 FR-South V  | 1 | 5 | 1.13094  | #####    |  |
| 55 | 2 FR | 2020-13 | 1 FR-South V  | 2 | 1 | 2.11391  | #####    |  |
| 56 | 2 FR | 2020-13 | 1 FR-South V  | 2 | 2 | 2.16129  | #####    |  |
| 57 | 2 FR | 2020-13 | 1 FR-South V  | 2 | 3 | 2.846154 | #####    |  |
| 58 | 2 FR | 2020-13 | 1 FR-South V  | 2 | 4 | 2.525253 | #####    |  |
| 59 | 2 FR | 2020-13 | 1 FR-South V  | 2 |   |          |          |  |
| 60 | 2 FR | 2020-13 | 1 FR-South V  | 2 |   |          |          |  |

|    |      |         |               |   |   |          |          |  |
|----|------|---------|---------------|---|---|----------|----------|--|
| 1  |      |         |               |   |   |          |          |  |
| 2  |      |         |               |   |   |          |          |  |
| 3  | 2 FR | 2020-13 | 1 FR-South V  | 2 | 5 | 1.254545 | #####    |  |
| 4  | 2 FR | 2020-13 | 1 FR-South V  | 3 | 1 | 1.842048 | #####    |  |
| 5  | 2 FR | 2020-13 | 1 FR-South V  | 3 | 2 | 2.142857 | #####    |  |
| 6  | 2 FR | 2020-13 | 1 FR-South V  | 3 | 3 | 2.071429 | #####    |  |
| 7  | 2 FR | 2020-13 | 1 FR-South V  | 3 | 4 | 2.515152 | #####    |  |
| 8  | 2 FR | 2020-13 | 1 FR-South V  | 3 | 5 | #####    | #####    |  |
| 9  | 2 FR | 2020-13 | 1 FR-West     | 1 | 1 | 2.434867 | #####    |  |
| 10 | 2 FR | 2020-13 | 1 FR-West     | 1 | 2 | 3.781091 | 1.183962 |  |
| 11 | 2 FR | 2020-13 | 1 FR-West     | 1 | 3 | 2.92136  | #####    |  |
| 12 | 2 FR | 2020-13 | 1 FR-West     | 1 | 4 | 2.771198 | #####    |  |
| 13 | 2 FR | 2020-13 | 1 FR-West     | 1 | 5 | 1.426028 | #####    |  |
| 14 | 2 FR | 2020-13 | 1 FR-West     | 2 | 1 | 2.41963  | #####    |  |
| 15 | 2 FR | 2020-13 | 1 FR-West     | 2 | 2 | 2.733333 | #####    |  |
| 16 | 2 FR | 2020-13 | 1 FR-West     | 2 | 3 | 3.315789 | #####    |  |
| 17 | 2 FR | 2020-13 | 1 FR-West     | 2 | 4 | 2.645161 | #####    |  |
| 18 | 2 FR | 2020-13 | 1 FR-West     | 2 | 5 | 1.234043 | #####    |  |
| 19 | 2 FR | 2020-13 | 1 FR-West     | 3 | 1 | 2.454202 | #####    |  |
| 20 | 2 FR | 2020-13 | 1 FR-West     | 3 | 2 | 4.875    | 2.280842 |  |
| 21 | 2 FR | 2020-13 | 1 FR-West     | 3 | 3 | 2.1875   | #####    |  |
| 22 | 2 FR | 2020-13 | 1 FR-West     | 3 | 4 | 2.939394 | #####    |  |
| 23 | 2 FR | 2020-13 | 1 FR-West     | 3 | 5 | 1.612903 | #####    |  |
| 24 | 2 FR | 2020-13 | 2 FR-Corse    | 1 | 1 | #####    | #####    |  |
| 25 | 2 FR | 2020-13 | 2 FR-Corse    | 1 | 2 | 2        | 0        |  |
| 26 | 2 FR | 2020-13 | 2 FR-Corse    | 1 | 5 | 0        | 0        |  |
| 27 | 2 FR | 2020-13 | 2 FR-Corse    | 2 | 1 | #####    | #####    |  |
| 28 | 2 FR | 2020-13 | 2 FR-Corse    | 2 | 2 | 2        | 0        |  |
| 29 | 2 FR | 2020-13 | 2 FR-Corse    | 2 | 5 | 0        | 0        |  |
| 30 | 2 FR | 2020-13 | 2 FR-Ile de F | 1 | 1 | 1.163957 | #####    |  |
| 31 | 2 FR | 2020-13 | 2 FR-Ile de F | 1 | 2 | 1.824344 | #####    |  |
| 32 | 2 FR | 2020-13 | 2 FR-Ile de F | 1 | 3 | #####    | #####    |  |
| 33 | 2 FR | 2020-13 | 2 FR-Ile de F | 1 | 4 | 1.169941 | #####    |  |
| 34 | 2 FR | 2020-13 | 2 FR-Ile de F | 1 | 5 | 1.03661  | #####    |  |
| 35 | 2 FR | 2020-13 | 2 FR-Ile de F | 2 | 1 | 1.205057 | #####    |  |
| 36 | 2 FR | 2020-13 | 2 FR-Ile de F | 2 | 2 | 1.75     | #####    |  |
| 37 | 2 FR | 2020-13 | 2 FR-Ile de F | 2 | 3 | #####    | #####    |  |
| 38 | 2 FR | 2020-13 | 2 FR-Ile de F | 2 | 4 | 1.314607 | #####    |  |
| 39 | 2 FR | 2020-13 | 2 FR-Ile de F | 2 | 5 | 1.068966 | #####    |  |
| 40 | 2 FR | 2020-13 | 2 FR-Ile de F | 3 | 1 | 1.122391 | #####    |  |
| 41 | 2 FR | 2020-13 | 2 FR-Ile de F | 3 | 2 | 1.857143 | #####    |  |
| 42 | 2 FR | 2020-13 | 2 FR-Ile de F | 3 | 3 | 0.8125   | #####    |  |
| 43 | 2 FR | 2020-13 | 2 FR-Ile de F | 3 | 4 | #####    | #####    |  |
| 44 | 2 FR | 2020-13 | 2 FR-Ile de F | 3 | 5 | 1        | #####    |  |
| 45 | 2 FR | 2020-13 | 2 FR-North E  | 1 | 1 | 1.281034 | #####    |  |
| 46 | 2 FR | 2020-13 | 2 FR-North E  | 1 | 2 | 1.973261 | #####    |  |
| 47 | 2 FR | 2020-13 | 2 FR-North E  | 1 | 3 | 1.420228 | #####    |  |
| 48 | 2 FR | 2020-13 | 2 FR-North E  | 1 | 4 | 1.28597  | #####    |  |
| 49 | 2 FR | 2020-13 | 2 FR-North E  | 1 | 5 | #####    | #####    |  |
| 50 | 2 FR | 2020-13 | 2 FR-North E  | 2 | 1 | 1.337568 | #####    |  |
| 51 | 2 FR | 2020-13 | 2 FR-North E  | 2 | 2 | 1.592593 | #####    |  |
| 52 | 2 FR | 2020-13 | 2 FR-North E  | 2 | 3 | 1.775    | #####    |  |
| 53 | 2 FR | 2020-13 | 2 FR-North E  | 2 | 4 | 1.357143 | #####    |  |
| 54 | 2 FR | 2020-13 | 2 FR-North E  | 2 | 5 | #####    | #####    |  |
| 55 | 2 FR | 2020-13 | 2 FR-North E  | 3 | 1 | 1.208749 | #####    |  |
| 56 | 2 FR | 2020-13 | 2 FR-North E  | 3 | 2 | 2.363636 | #####    |  |
| 57 | 2 FR | 2020-13 | 2 FR-North E  | 3 | 3 | 1        | #####    |  |
| 58 | 2 FR | 2020-13 | 2 FR-North E  | 3 | 4 | 1.181818 | #####    |  |
| 59 | 2 FR | 2020-13 | 2 FR-North E  | 3 |   |          |          |  |
| 60 | 2 FR | 2020-13 | 2 FR-North E  | 3 |   |          |          |  |

|    |      |         |              |   |   |          |       |
|----|------|---------|--------------|---|---|----------|-------|
| 1  |      |         |              |   |   |          |       |
| 2  |      |         |              |   |   |          |       |
| 3  | 2 FR | 2020-13 | 2 FR-North E | 3 | 5 | #####    | ##### |
| 4  | 2 FR | 2020-13 | 2 FR-Overall | 1 | 1 | 1.19888  | ##### |
| 5  | 2 FR | 2020-13 | 2 FR-Overall | 1 | 2 | 1.695489 | ##### |
| 6  | 2 FR | 2020-13 | 2 FR-Overall | 1 | 3 | 1.313857 | ##### |
| 7  | 2 FR | 2020-13 | 2 FR-Overall | 1 | 4 | 1.230118 | ##### |
| 8  | 2 FR | 2020-13 | 2 FR-Overall | 1 | 5 | #####    | ##### |
| 9  | 2 FR | 2020-13 | 2 FR-Overall | 2 | 1 | 1.254644 | ##### |
| 10 | 2 FR | 2020-13 | 2 FR-Overall | 2 | 2 | 1.606484 | ##### |
| 11 | 2 FR | 2020-13 | 2 FR-Overall | 2 | 3 | 1.543603 | ##### |
| 12 | 2 FR | 2020-13 | 2 FR-Overall | 2 | 4 | 1.310177 | ##### |
| 13 | 2 FR | 2020-13 | 2 FR-Overall | 2 | 5 | #####    | ##### |
| 14 | 2 FR | 2020-13 | 2 FR-Overall | 3 | 1 | 1.127507 | ##### |
| 15 | 2 FR | 2020-13 | 2 FR-Overall | 3 | 2 | 1.76609  | ##### |
| 16 | 2 FR | 2020-13 | 2 FR-Overall | 3 | 3 | 1.000921 | ##### |
| 17 | 2 FR | 2020-13 | 2 FR-Overall | 3 | 4 | 1.116425 | ##### |
| 18 | 2 FR | 2020-13 | 2 FR-Overall | 3 | 5 | #####    | ##### |
| 19 | 2 FR | 2020-13 | 2 FR-South E | 1 | 1 | 1.295718 | ##### |
| 20 | 2 FR | 2020-13 | 2 FR-South E | 1 | 2 | 1.611467 | ##### |
| 21 | 2 FR | 2020-13 | 2 FR-South E | 1 | 3 | 1.484932 | ##### |
| 22 | 2 FR | 2020-13 | 2 FR-South E | 1 | 4 | 1.370357 | ##### |
| 23 | 2 FR | 2020-13 | 2 FR-South E | 1 | 5 | #####    | ##### |
| 24 | 2 FR | 2020-13 | 2 FR-South E | 2 | 1 | 1.327505 | ##### |
| 25 | 2 FR | 2020-13 | 2 FR-South E | 2 | 2 | 1.884615 | ##### |
| 26 | 2 FR | 2020-13 | 2 FR-South E | 2 | 3 | 1.597403 | ##### |
| 27 | 2 FR | 2020-13 | 2 FR-South E | 2 | 4 | 1.397959 | ##### |
| 28 | 2 FR | 2020-13 | 2 FR-South E | 2 | 5 | #####    | ##### |
| 29 | 2 FR | 2020-13 | 2 FR-South E | 3 | 1 | 1.250264 | ##### |
| 30 | 2 FR | 2020-13 | 2 FR-South E | 3 | 2 | 1.4375   | ##### |
| 31 | 2 FR | 2020-13 | 2 FR-South E | 3 | 3 | 1.277778 | ##### |
| 32 | 2 FR | 2020-13 | 2 FR-South E | 3 | 4 | 1.333333 | ##### |
| 33 | 2 FR | 2020-13 | 2 FR-South E | 3 | 5 | #####    | ##### |
| 34 | 2 FR | 2020-13 | 2 FR-South E | 3 | 5 | #####    | ##### |
| 35 | 2 FR | 2020-13 | 2 FR-South V | 1 | 1 | 1.112029 | ##### |
| 36 | 2 FR | 2020-13 | 2 FR-South V | 1 | 2 | 1.555315 | ##### |
| 37 | 2 FR | 2020-13 | 2 FR-South V | 1 | 3 | 1.201942 | ##### |
| 38 | 2 FR | 2020-13 | 2 FR-South V | 1 | 4 | 1.233515 | ##### |
| 39 | 2 FR | 2020-13 | 2 FR-South V | 1 | 5 | #####    | ##### |
| 40 | 2 FR | 2020-13 | 2 FR-South V | 2 | 1 | 1.232423 | ##### |
| 41 | 2 FR | 2020-13 | 2 FR-South V | 2 | 2 | 1.5      | ##### |
| 42 | 2 FR | 2020-13 | 2 FR-South V | 2 | 3 | 1.545455 | ##### |
| 43 | 2 FR | 2020-13 | 2 FR-South V | 2 | 4 | 1.333333 | ##### |
| 44 | 2 FR | 2020-13 | 2 FR-South V | 2 | 5 | #####    | ##### |
| 45 | 2 FR | 2020-13 | 2 FR-South V | 3 | 1 | #####    | ##### |
| 46 | 2 FR | 2020-13 | 2 FR-South V | 3 | 2 | 1.625    | ##### |
| 47 | 2 FR | 2020-13 | 2 FR-South V | 3 | 3 | 0.75     | ##### |
| 48 | 2 FR | 2020-13 | 2 FR-South V | 3 | 4 | 1.083333 | ##### |
| 49 | 2 FR | 2020-13 | 2 FR-South V | 3 | 5 | 0.6875   | ##### |
| 50 | 2 FR | 2020-13 | 2 FR-West    | 1 | 1 | 1.143356 | ##### |
| 51 | 2 FR | 2020-13 | 2 FR-West    | 1 | 2 | 1.453892 | ##### |
| 52 | 2 FR | 2020-13 | 2 FR-West    | 1 | 3 | 1.575492 | ##### |
| 53 | 2 FR | 2020-13 | 2 FR-West    | 1 | 4 | 1.099026 | ##### |
| 54 | 2 FR | 2020-13 | 2 FR-West    | 1 | 5 | #####    | ##### |
| 55 | 2 FR | 2020-13 | 2 FR-West    | 2 | 1 | 1.171348 | ##### |
| 56 | 2 FR | 2020-13 | 2 FR-West    | 2 | 2 | 1.315789 | ##### |
| 57 | 2 FR | 2020-13 | 2 FR-West    | 2 | 3 | 1.771084 | ##### |
| 58 | 2 FR | 2020-13 | 2 FR-West    | 2 | 4 | 1.148515 | ##### |
| 59 | 2 FR | 2020-13 | 2 FR-West    | 2 | 5 | #####    | ##### |
| 60 | 2 FR | 2020-13 | 2 FR-West    | 2 | 5 | #####    | ##### |

|    |      |         |               |   |   |          |       |   |  |
|----|------|---------|---------------|---|---|----------|-------|---|--|
| 1  |      |         |               |   |   |          |       |   |  |
| 2  |      |         |               |   |   |          |       |   |  |
| 3  | 2 FR | 2020-13 | 2 FR-West     | 3 | 1 | 1.106341 | ##### |   |  |
| 4  | 2 FR | 2020-13 | 2 FR-West     | 3 | 2 | 1.6      | ##### |   |  |
| 5  | 2 FR | 2020-13 | 2 FR-West     | 3 | 3 | 1.222222 | ##### |   |  |
| 6  | 2 FR | 2020-13 | 2 FR-West     | 3 | 4 | 1.029412 | ##### |   |  |
| 7  | 2 FR | 2020-13 | 2 FR-West     | 3 | 5 | #####    | ##### |   |  |
| 8  | 2 FR | 2020-13 | 3 FR-Corse    | 1 | 1 | 0        |       | 0 |  |
| 9  | 2 FR | 2020-13 | 3 FR-Corse    | 1 | 2 | 0        |       | 0 |  |
| 10 | 2 FR | 2020-13 | 3 FR-Corse    | 1 | 5 | 0        |       | 0 |  |
| 11 | 2 FR | 2020-13 | 3 FR-Corse    | 2 | 1 | 0        |       | 0 |  |
| 12 | 2 FR | 2020-13 | 3 FR-Corse    | 2 | 2 | 0        |       | 0 |  |
| 13 | 2 FR | 2020-13 | 3 FR-Corse    | 2 | 5 | 0        |       | 0 |  |
| 14 | 2 FR | 2020-13 | 3 FR-Ile de F | 1 | 1 | 0        |       | 0 |  |
| 15 | 2 FR | 2020-13 | 3 FR-Ile de F | 1 | 2 | 0        |       | 0 |  |
| 16 | 2 FR | 2020-13 | 3 FR-Ile de F | 1 | 3 | 0        |       | 0 |  |
| 17 | 2 FR | 2020-13 | 3 FR-Ile de F | 1 | 4 | 0        |       | 0 |  |
| 18 | 2 FR | 2020-13 | 3 FR-Ile de F | 1 | 5 | 0        |       | 0 |  |
| 19 | 2 FR | 2020-13 | 3 FR-Ile de F | 2 | 1 | 0        |       | 0 |  |
| 20 | 2 FR | 2020-13 | 3 FR-Ile de F | 2 | 2 | 0        |       | 0 |  |
| 21 | 2 FR | 2020-13 | 3 FR-Ile de F | 2 | 3 | 0        |       | 0 |  |
| 22 | 2 FR | 2020-13 | 3 FR-Ile de F | 2 | 4 | 0        |       | 0 |  |
| 23 | 2 FR | 2020-13 | 3 FR-Ile de F | 2 | 5 | 0        |       | 0 |  |
| 24 | 2 FR | 2020-13 | 3 FR-Ile de F | 3 | 1 | 0        |       | 0 |  |
| 25 | 2 FR | 2020-13 | 3 FR-Ile de F | 3 | 2 | 0        |       | 0 |  |
| 26 | 2 FR | 2020-13 | 3 FR-Ile de F | 3 | 3 | 0        |       | 0 |  |
| 27 | 2 FR | 2020-13 | 3 FR-Ile de F | 3 | 4 | 0        |       | 0 |  |
| 28 | 2 FR | 2020-13 | 3 FR-Ile de F | 3 | 5 | 0        |       | 0 |  |
| 29 | 2 FR | 2020-13 | 3 FR-Ile de F | 3 | 5 | 0        |       | 0 |  |
| 30 | 2 FR | 2020-13 | 3 FR-North E  | 1 | 1 | 0        |       | 0 |  |
| 31 | 2 FR | 2020-13 | 3 FR-North E  | 1 | 2 | 0        |       | 0 |  |
| 32 | 2 FR | 2020-13 | 3 FR-North E  | 1 | 3 | 0        |       | 0 |  |
| 33 | 2 FR | 2020-13 | 3 FR-North E  | 1 | 4 | 0        |       | 0 |  |
| 34 | 2 FR | 2020-13 | 3 FR-North E  | 1 | 5 | 0        |       | 0 |  |
| 35 | 2 FR | 2020-13 | 3 FR-North E  | 2 | 1 | 0        |       | 0 |  |
| 36 | 2 FR | 2020-13 | 3 FR-North E  | 2 | 2 | 0        |       | 0 |  |
| 37 | 2 FR | 2020-13 | 3 FR-North E  | 2 | 3 | 0        |       | 0 |  |
| 38 | 2 FR | 2020-13 | 3 FR-North E  | 2 | 4 | 0        |       | 0 |  |
| 39 | 2 FR | 2020-13 | 3 FR-North E  | 2 | 5 | 0        |       | 0 |  |
| 40 | 2 FR | 2020-13 | 3 FR-North E  | 3 | 1 | 0        |       | 0 |  |
| 41 | 2 FR | 2020-13 | 3 FR-North E  | 3 | 2 | 0        |       | 0 |  |
| 42 | 2 FR | 2020-13 | 3 FR-North E  | 3 | 3 | 0        |       | 0 |  |
| 43 | 2 FR | 2020-13 | 3 FR-North E  | 3 | 4 | 0        |       | 0 |  |
| 44 | 2 FR | 2020-13 | 3 FR-North E  | 3 | 5 | 0        |       | 0 |  |
| 45 | 2 FR | 2020-13 | 3 FR-Overall  | 1 | 1 | 0        |       | 0 |  |
| 46 | 2 FR | 2020-13 | 3 FR-Overall  | 1 | 2 | 0        |       | 0 |  |
| 47 | 2 FR | 2020-13 | 3 FR-Overall  | 1 | 3 | 0        |       | 0 |  |
| 48 | 2 FR | 2020-13 | 3 FR-Overall  | 1 | 4 | 0        |       | 0 |  |
| 49 | 2 FR | 2020-13 | 3 FR-Overall  | 1 | 5 | 0        |       | 0 |  |
| 50 | 2 FR | 2020-13 | 3 FR-Overall  | 2 | 1 | 0        |       | 0 |  |
| 51 | 2 FR | 2020-13 | 3 FR-Overall  | 2 | 2 | 0        |       | 0 |  |
| 52 | 2 FR | 2020-13 | 3 FR-Overall  | 2 | 3 | 0        |       | 0 |  |
| 53 | 2 FR | 2020-13 | 3 FR-Overall  | 2 | 4 | 0        |       | 0 |  |
| 54 | 2 FR | 2020-13 | 3 FR-Overall  | 2 | 5 | 0        |       | 0 |  |
| 55 | 2 FR | 2020-13 | 3 FR-Overall  | 3 | 1 | 0        |       | 0 |  |
| 56 | 2 FR | 2020-13 | 3 FR-Overall  | 3 | 2 | 0        |       | 0 |  |
| 57 | 2 FR | 2020-13 | 3 FR-Overall  | 3 | 3 | 0        |       | 0 |  |
| 58 | 2 FR | 2020-13 | 3 FR-Overall  | 3 | 4 | 0        |       | 0 |  |
| 59 | 2 FR | 2020-13 | 3 FR-Overall  | 3 | 5 | 0        |       | 0 |  |
| 60 | 2 FR | 2020-13 | 3 FR-Overall  | 3 | 5 | 0        |       | 0 |  |



|    |      |         |               |   |   |          |       |
|----|------|---------|---------------|---|---|----------|-------|
| 1  |      |         |               |   |   |          |       |
| 2  |      |         |               |   |   |          |       |
| 3  | 2 FR | 2020-13 | 3 FR-South E  | 1 | 1 | 0        | 0     |
| 4  | 2 FR | 2020-13 | 3 FR-South E  | 1 | 2 | 0        | 0     |
| 5  | 2 FR | 2020-13 | 3 FR-South E  | 1 | 3 | 0        | 0     |
| 6  | 2 FR | 2020-13 | 3 FR-South E  | 1 | 4 | 0        | 0     |
| 7  | 2 FR | 2020-13 | 3 FR-South E  | 1 | 5 | 0        | 0     |
| 8  | 2 FR | 2020-13 | 3 FR-South E  | 2 | 1 | 0        | 0     |
| 9  | 2 FR | 2020-13 | 3 FR-South E  | 2 | 2 | 0        | 0     |
| 10 | 2 FR | 2020-13 | 3 FR-South E  | 2 | 3 | 0        | 0     |
| 11 | 2 FR | 2020-13 | 3 FR-South E  | 2 | 4 | 0        | 0     |
| 12 | 2 FR | 2020-13 | 3 FR-South E  | 2 | 5 | 0        | 0     |
| 13 | 2 FR | 2020-13 | 3 FR-South E  | 3 | 1 | 0        | 0     |
| 14 | 2 FR | 2020-13 | 3 FR-South E  | 3 | 2 | 0        | 0     |
| 15 | 2 FR | 2020-13 | 3 FR-South E  | 3 | 3 | 0        | 0     |
| 16 | 2 FR | 2020-13 | 3 FR-South E  | 3 | 4 | 0        | 0     |
| 17 | 2 FR | 2020-13 | 3 FR-South E  | 3 | 5 | 0        | 0     |
| 18 | 2 FR | 2020-13 | 3 FR-South V  | 1 | 1 | 0        | 0     |
| 19 | 2 FR | 2020-13 | 3 FR-South V  | 1 | 2 | 0        | 0     |
| 20 | 2 FR | 2020-13 | 3 FR-South V  | 1 | 3 | 0        | 0     |
| 21 | 2 FR | 2020-13 | 3 FR-South V  | 1 | 4 | 0        | 0     |
| 22 | 2 FR | 2020-13 | 3 FR-South V  | 1 | 5 | 0        | 0     |
| 23 | 2 FR | 2020-13 | 3 FR-South V  | 2 | 1 | 0        | 0     |
| 24 | 2 FR | 2020-13 | 3 FR-South V  | 2 | 2 | 0        | 0     |
| 25 | 2 FR | 2020-13 | 3 FR-South V  | 2 | 3 | 0        | 0     |
| 26 | 2 FR | 2020-13 | 3 FR-South V  | 2 | 4 | 0        | 0     |
| 27 | 2 FR | 2020-13 | 3 FR-South V  | 2 | 5 | 0        | 0     |
| 28 | 2 FR | 2020-13 | 3 FR-South V  | 3 | 1 | 0        | 0     |
| 29 | 2 FR | 2020-13 | 3 FR-South V  | 3 | 2 | 0        | 0     |
| 30 | 2 FR | 2020-13 | 3 FR-South V  | 3 | 3 | 0        | 0     |
| 31 | 2 FR | 2020-13 | 3 FR-South V  | 3 | 4 | 0        | 0     |
| 32 | 2 FR | 2020-13 | 3 FR-South V  | 3 | 5 | 0        | 0     |
| 33 | 2 FR | 2020-13 | 3 FR-South V  | 3 | 5 | 0        | 0     |
| 34 | 2 FR | 2020-13 | 3 FR-West     | 1 | 1 | 0        | 0     |
| 35 | 2 FR | 2020-13 | 3 FR-West     | 1 | 2 | 0        | 0     |
| 36 | 2 FR | 2020-13 | 3 FR-West     | 1 | 3 | 0        | 0     |
| 37 | 2 FR | 2020-13 | 3 FR-West     | 1 | 4 | 0        | 0     |
| 38 | 2 FR | 2020-13 | 3 FR-West     | 1 | 5 | 0        | 0     |
| 39 | 2 FR | 2020-13 | 3 FR-West     | 2 | 1 | 0        | 0     |
| 40 | 2 FR | 2020-13 | 3 FR-West     | 2 | 2 | 0        | 0     |
| 41 | 2 FR | 2020-13 | 3 FR-West     | 2 | 3 | 0        | 0     |
| 42 | 2 FR | 2020-13 | 3 FR-West     | 2 | 4 | 0        | 0     |
| 43 | 2 FR | 2020-13 | 3 FR-West     | 2 | 5 | 0        | 0     |
| 44 | 2 FR | 2020-13 | 3 FR-West     | 3 | 1 | 0        | 0     |
| 45 | 2 FR | 2020-13 | 3 FR-West     | 3 | 2 | 0        | 0     |
| 46 | 2 FR | 2020-13 | 3 FR-West     | 3 | 3 | 0        | 0     |
| 47 | 2 FR | 2020-13 | 3 FR-West     | 3 | 4 | 0        | 0     |
| 48 | 2 FR | 2020-13 | 3 FR-West     | 3 | 5 | 0        | 0     |
| 49 | 2 FR | 2020-13 | 4 FR-Corse    | 1 | 1 | 0        | 0     |
| 50 | 2 FR | 2020-13 | 4 FR-Corse    | 1 | 2 | 0        | 0     |
| 51 | 2 FR | 2020-13 | 4 FR-Corse    | 1 | 5 | 0        | 0     |
| 52 | 2 FR | 2020-13 | 4 FR-Corse    | 2 | 1 | 0        | 0     |
| 53 | 2 FR | 2020-13 | 4 FR-Corse    | 2 | 2 | 0        | 0     |
| 54 | 2 FR | 2020-13 | 4 FR-Corse    | 2 | 5 | 0        | 0     |
| 55 | 2 FR | 2020-13 | 4 FR-Ile de F | 1 | 1 | #####    | ##### |
| 56 | 2 FR | 2020-13 | 4 FR-Ile de F | 1 | 2 | 0        | 0     |
| 57 | 2 FR | 2020-13 | 4 FR-Ile de F | 1 | 3 | #####    | ##### |
| 58 | 2 FR | 2020-13 | 4 FR-Ile de F | 1 | 4 | 1.028143 | ##### |
| 59 | 2 FR | 2020-13 | 4 FR-Ile de F | 1 | 5 | #####    | ##### |
| 60 | 2 FR | 2020-13 | 4 FR-Ile de F | 1 | 5 | #####    | ##### |

|    |      |         |               |   |   |          |          |  |
|----|------|---------|---------------|---|---|----------|----------|--|
| 1  |      |         |               |   |   |          |          |  |
| 2  |      |         |               |   |   |          |          |  |
| 3  | 2 FR | 2020-13 | 4 FR-Ile de F | 2 | 1 | #####    | #####    |  |
| 4  | 2 FR | 2020-13 | 4 FR-Ile de F | 2 | 2 | 0        | 0        |  |
| 5  | 2 FR | 2020-13 | 4 FR-Ile de F | 2 | 3 | 0        | 0        |  |
| 6  | 2 FR | 2020-13 | 4 FR-Ile de F | 2 | 4 | 1.16092  | #####    |  |
| 7  | 2 FR | 2020-13 | 4 FR-Ile de F | 2 | 5 | #####    | #####    |  |
| 8  | 2 FR | 2020-13 | 4 FR-Ile de F | 3 | 1 | #####    | #####    |  |
| 9  | 2 FR | 2020-13 | 4 FR-Ile de F | 3 | 2 | 0        | 0        |  |
| 10 | 2 FR | 2020-13 | 4 FR-Ile de F | 3 | 3 | 0.25     | #####    |  |
| 11 | 2 FR | 2020-13 | 4 FR-Ile de F | 3 | 4 | #####    | #####    |  |
| 12 | 2 FR | 2020-13 | 4 FR-Ile de F | 3 | 5 | 0        | 0        |  |
| 13 | 2 FR | 2020-13 | 4 FR-North E  | 1 | 1 | #####    | #####    |  |
| 14 | 2 FR | 2020-13 | 4 FR-North E  | 1 | 2 | #####    | #####    |  |
| 15 | 2 FR | 2020-13 | 4 FR-North E  | 1 | 3 | #####    | #####    |  |
| 16 | 2 FR | 2020-13 | 4 FR-North E  | 1 | 4 | 1.654755 | #####    |  |
| 17 | 2 FR | 2020-13 | 4 FR-North E  | 1 | 5 | #####    | #####    |  |
| 18 | 2 FR | 2020-13 | 4 FR-North E  | 2 | 1 | #####    | #####    |  |
| 19 | 2 FR | 2020-13 | 4 FR-North E  | 2 | 2 | #####    | #####    |  |
| 20 | 2 FR | 2020-13 | 4 FR-North E  | 2 | 3 | #####    | #####    |  |
| 21 | 2 FR | 2020-13 | 4 FR-North E  | 2 | 4 | 1.604167 | #####    |  |
| 22 | 2 FR | 2020-13 | 4 FR-North E  | 2 | 5 | 0        | 0        |  |
| 23 | 2 FR | 2020-13 | 4 FR-North E  | 3 | 1 | #####    | #####    |  |
| 24 | 2 FR | 2020-13 | 4 FR-North E  | 3 | 2 | 0.3      | #####    |  |
| 25 | 2 FR | 2020-13 | 4 FR-North E  | 3 | 3 | 1.173913 | #####    |  |
| 26 | 2 FR | 2020-13 | 4 FR-North E  | 3 | 4 | 1.727273 | #####    |  |
| 27 | 2 FR | 2020-13 | 4 FR-North E  | 3 | 5 | #####    | #####    |  |
| 28 | 2 FR | 2020-13 | 4 FR-Overall  | 1 | 1 | #####    | #####    |  |
| 29 | 2 FR | 2020-13 | 4 FR-Overall  | 1 | 2 | #####    | #####    |  |
| 30 | 2 FR | 2020-13 | 4 FR-Overall  | 1 | 3 | #####    | #####    |  |
| 31 | 2 FR | 2020-13 | 4 FR-Overall  | 1 | 4 | 1.014611 | #####    |  |
| 32 | 2 FR | 2020-13 | 4 FR-Overall  | 1 | 5 | #####    | #####    |  |
| 33 | 2 FR | 2020-13 | 4 FR-Overall  | 2 | 1 | #####    | #####    |  |
| 34 | 2 FR | 2020-13 | 4 FR-Overall  | 2 | 2 | #####    | #####    |  |
| 35 | 2 FR | 2020-13 | 4 FR-Overall  | 2 | 2 | #####    | #####    |  |
| 36 | 2 FR | 2020-13 | 4 FR-Overall  | 2 | 3 | #####    | #####    |  |
| 37 | 2 FR | 2020-13 | 4 FR-Overall  | 2 | 4 | 1.026401 | #####    |  |
| 38 | 2 FR | 2020-13 | 4 FR-Overall  | 2 | 5 | #####    | #####    |  |
| 39 | 2 FR | 2020-13 | 4 FR-Overall  | 3 | 1 | #####    | #####    |  |
| 40 | 2 FR | 2020-13 | 4 FR-Overall  | 3 | 2 | #####    | #####    |  |
| 41 | 2 FR | 2020-13 | 4 FR-Overall  | 3 | 3 | 1.03218  | #####    |  |
| 42 | 2 FR | 2020-13 | 4 FR-Overall  | 3 | 4 | #####    | #####    |  |
| 43 | 2 FR | 2020-13 | 4 FR-Overall  | 3 | 5 | #####    | #####    |  |
| 44 | 2 FR | 2020-13 | 4 FR-South E  | 1 | 1 | #####    | #####    |  |
| 45 | 2 FR | 2020-13 | 4 FR-South E  | 1 | 2 | #####    | #####    |  |
| 46 | 2 FR | 2020-13 | 4 FR-South E  | 1 | 3 | 1.161822 | #####    |  |
| 47 | 2 FR | 2020-13 | 4 FR-South E  | 1 | 4 | #####    | #####    |  |
| 48 | 2 FR | 2020-13 | 4 FR-South E  | 1 | 5 | #####    | #####    |  |
| 49 | 2 FR | 2020-13 | 4 FR-South E  | 2 | 1 | #####    | #####    |  |
| 50 | 2 FR | 2020-13 | 4 FR-South E  | 2 | 2 | #####    | #####    |  |
| 51 | 2 FR | 2020-13 | 4 FR-South E  | 2 | 3 | #####    | #####    |  |
| 52 | 2 FR | 2020-13 | 4 FR-South E  | 2 | 4 | #####    | #####    |  |
| 53 | 2 FR | 2020-13 | 4 FR-South E  | 2 | 5 | #####    | #####    |  |
| 54 | 2 FR | 2020-13 | 4 FR-South E  | 3 | 1 | #####    | #####    |  |
| 55 | 2 FR | 2020-13 | 4 FR-South E  | 3 | 2 | 0        | 0        |  |
| 56 | 2 FR | 2020-13 | 4 FR-South E  | 3 | 3 | 1.555556 | 1.139269 |  |
| 57 | 2 FR | 2020-13 | 4 FR-South E  | 3 | 4 | #####    | #####    |  |
| 58 | 2 FR | 2020-13 | 4 FR-South E  | 3 | 5 | #####    | #####    |  |
| 59 | 2 FR | 2020-13 | 4 FR-South E  | 3 | 5 | #####    | #####    |  |
| 60 | 2 FR | 2020-13 | 4 FR-South V  | 1 | 1 | #####    | #####    |  |

|    |      |         |               |   |   |          |          |  |
|----|------|---------|---------------|---|---|----------|----------|--|
| 1  |      |         |               |   |   |          |          |  |
| 2  |      |         |               |   |   |          |          |  |
| 3  | 2 FR | 2020-13 | 4 FR-South V  | 1 | 2 | #####    | #####    |  |
| 4  | 2 FR | 2020-13 | 4 FR-South V  | 1 | 3 | 1.217984 | #####    |  |
| 5  | 2 FR | 2020-13 | 4 FR-South V  | 1 | 4 | #####    | #####    |  |
| 6  | 2 FR | 2020-13 | 4 FR-South V  | 1 | 5 | 0        | 0        |  |
| 7  | 2 FR | 2020-13 | 4 FR-South V  | 2 | 1 | #####    | #####    |  |
| 8  | 2 FR | 2020-13 | 4 FR-South V  | 2 | 2 | #####    | #####    |  |
| 9  | 2 FR | 2020-13 | 4 FR-South V  | 2 | 3 | #####    | #####    |  |
| 10 | 2 FR | 2020-13 | 4 FR-South V  | 2 | 4 | #####    | #####    |  |
| 11 | 2 FR | 2020-13 | 4 FR-South V  | 2 | 5 | 0        | 0        |  |
| 12 | 2 FR | 2020-13 | 4 FR-South V  | 3 | 1 | #####    | #####    |  |
| 13 | 2 FR | 2020-13 | 4 FR-South V  | 3 | 2 | 0        | 0        |  |
| 14 | 2 FR | 2020-13 | 4 FR-South V  | 3 | 3 | 1.9375   | 1.084333 |  |
| 15 | 2 FR | 2020-13 | 4 FR-South V  | 3 | 4 | #####    | #####    |  |
| 16 | 2 FR | 2020-13 | 4 FR-South V  | 3 | 5 | 0        | 0        |  |
| 17 | 2 FR | 2020-13 | 4 FR-West     | 1 | 1 | #####    | #####    |  |
| 18 | 2 FR | 2020-13 | 4 FR-West     | 1 | 2 | 1.807988 | 1.053509 |  |
| 19 | 2 FR | 2020-13 | 4 FR-West     | 1 | 3 | #####    | #####    |  |
| 20 | 2 FR | 2020-13 | 4 FR-West     | 1 | 4 | #####    | #####    |  |
| 21 | 2 FR | 2020-13 | 4 FR-West     | 1 | 5 | #####    | #####    |  |
| 22 | 2 FR | 2020-13 | 4 FR-West     | 2 | 1 | #####    | #####    |  |
| 23 | 2 FR | 2020-13 | 4 FR-West     | 2 | 2 | 1.03125  | #####    |  |
| 24 | 2 FR | 2020-13 | 4 FR-West     | 2 | 3 | 1.121951 | #####    |  |
| 25 | 2 FR | 2020-13 | 4 FR-West     | 2 | 4 | #####    | #####    |  |
| 26 | 2 FR | 2020-13 | 4 FR-West     | 2 | 5 | #####    | #####    |  |
| 27 | 2 FR | 2020-13 | 4 FR-West     | 3 | 1 | #####    | #####    |  |
| 28 | 2 FR | 2020-13 | 4 FR-West     | 3 | 2 | 2.5      | 1.904139 |  |
| 29 | 2 FR | 2020-13 | 4 FR-West     | 3 | 3 | #####    | #####    |  |
| 30 | 2 FR | 2020-13 | 4 FR-West     | 3 | 4 | #####    | #####    |  |
| 31 | 2 FR | 2020-13 | 4 FR-West     | 3 | 5 | 0        | 0        |  |
| 32 | 2 FR | 2020-13 | 5 FR-Corse    | 1 | 1 | #####    | #####    |  |
| 33 | 2 FR | 2020-13 | 5 FR-Corse    | 1 | 2 | 1        | 0        |  |
| 34 | 2 FR | 2020-13 | 5 FR-Corse    | 1 | 5 | 0        | 0        |  |
| 35 | 2 FR | 2020-13 | 5 FR-Corse    | 2 | 1 | #####    | #####    |  |
| 36 | 2 FR | 2020-13 | 5 FR-Corse    | 2 | 2 | 1        | 0        |  |
| 37 | 2 FR | 2020-13 | 5 FR-Corse    | 2 | 5 | 0        | 0        |  |
| 38 | 2 FR | 2020-13 | 5 FR-Ile de F | 1 | 1 | #####    | #####    |  |
| 39 | 2 FR | 2020-13 | 5 FR-Ile de F | 1 | 2 | #####    | #####    |  |
| 40 | 2 FR | 2020-13 | 5 FR-Ile de F | 1 | 3 | #####    | #####    |  |
| 41 | 2 FR | 2020-13 | 5 FR-Ile de F | 1 | 4 | #####    | #####    |  |
| 42 | 2 FR | 2020-13 | 5 FR-Ile de F | 1 | 5 | #####    | #####    |  |
| 43 | 2 FR | 2020-13 | 5 FR-Ile de F | 2 | 1 | #####    | #####    |  |
| 44 | 2 FR | 2020-13 | 5 FR-Ile de F | 2 | 2 | 0.15     | #####    |  |
| 45 | 2 FR | 2020-13 | 5 FR-Ile de F | 2 | 3 | #####    | #####    |  |
| 46 | 2 FR | 2020-13 | 5 FR-Ile de F | 2 | 4 | #####    | #####    |  |
| 47 | 2 FR | 2020-13 | 5 FR-Ile de F | 2 | 5 | #####    | #####    |  |
| 48 | 2 FR | 2020-13 | 5 FR-Ile de F | 3 | 1 | #####    | #####    |  |
| 49 | 2 FR | 2020-13 | 5 FR-Ile de F | 3 | 2 | #####    | #####    |  |
| 50 | 2 FR | 2020-13 | 5 FR-Ile de F | 3 | 3 | #####    | #####    |  |
| 51 | 2 FR | 2020-13 | 5 FR-Ile de F | 3 | 4 | 0.84375  | #####    |  |
| 52 | 2 FR | 2020-13 | 5 FR-Ile de F | 3 | 5 | #####    | #####    |  |
| 53 | 2 FR | 2020-13 | 5 FR-North E  | 1 | 1 | #####    | #####    |  |
| 54 | 2 FR | 2020-13 | 5 FR-North E  | 1 | 2 | #####    | #####    |  |
| 55 | 2 FR | 2020-13 | 5 FR-North E  | 1 | 3 | #####    | #####    |  |
| 56 | 2 FR | 2020-13 | 5 FR-North E  | 1 | 4 | #####    | #####    |  |
| 57 | 2 FR | 2020-13 | 5 FR-North E  | 1 | 5 | #####    | #####    |  |
| 58 | 2 FR | 2020-13 | 5 FR-North E  | 1 | 5 | #####    | #####    |  |
| 59 | 2 FR | 2020-13 | 5 FR-North E  | 2 | 1 | #####    | #####    |  |
| 60 | 2 FR | 2020-13 | 5 FR-North E  | 2 | 1 | #####    | #####    |  |

|    |      |         |              |   |   |        |       |
|----|------|---------|--------------|---|---|--------|-------|
| 1  |      |         |              |   |   |        |       |
| 2  |      |         |              |   |   |        |       |
| 3  | 2 FR | 2020-13 | 5 FR-North E | 2 | 2 | #####  | ##### |
| 4  | 2 FR | 2020-13 | 5 FR-North E | 2 | 3 | #####  | ##### |
| 5  | 2 FR | 2020-13 | 5 FR-North E | 2 | 4 | #####  | ##### |
| 6  | 2 FR | 2020-13 | 5 FR-North E | 2 | 5 | #####  | ##### |
| 7  | 2 FR | 2020-13 | 5 FR-North E | 3 | 1 | #####  | ##### |
| 8  | 2 FR | 2020-13 | 5 FR-North E | 3 | 2 | #####  | ##### |
| 9  | 2 FR | 2020-13 | 5 FR-North E | 3 | 3 | #####  | ##### |
| 10 | 2 FR | 2020-13 | 5 FR-North E | 3 | 4 | #####  | ##### |
| 11 | 2 FR | 2020-13 | 5 FR-North E | 3 | 5 | #####  | ##### |
| 12 | 2 FR | 2020-13 | 5 FR-Overall | 1 | 1 | #####  | ##### |
| 13 | 2 FR | 2020-13 | 5 FR-Overall | 1 | 2 | #####  | ##### |
| 14 | 2 FR | 2020-13 | 5 FR-Overall | 1 | 3 | #####  | ##### |
| 15 | 2 FR | 2020-13 | 5 FR-Overall | 1 | 4 | #####  | ##### |
| 16 | 2 FR | 2020-13 | 5 FR-Overall | 1 | 5 | #####  | ##### |
| 17 | 2 FR | 2020-13 | 5 FR-Overall | 2 | 1 | #####  | ##### |
| 18 | 2 FR | 2020-13 | 5 FR-Overall | 2 | 2 | #####  | ##### |
| 19 | 2 FR | 2020-13 | 5 FR-Overall | 2 | 3 | #####  | ##### |
| 20 | 2 FR | 2020-13 | 5 FR-Overall | 2 | 4 | #####  | ##### |
| 21 | 2 FR | 2020-13 | 5 FR-Overall | 2 | 5 | #####  | ##### |
| 22 | 2 FR | 2020-13 | 5 FR-Overall | 3 | 1 | #####  | ##### |
| 23 | 2 FR | 2020-13 | 5 FR-Overall | 3 | 2 | #####  | ##### |
| 24 | 2 FR | 2020-13 | 5 FR-Overall | 3 | 3 | #####  | ##### |
| 25 | 2 FR | 2020-13 | 5 FR-Overall | 3 | 4 | #####  | ##### |
| 26 | 2 FR | 2020-13 | 5 FR-Overall | 3 | 5 | #####  | ##### |
| 27 | 2 FR | 2020-13 | 5 FR-South E | 1 | 1 | #####  | ##### |
| 28 | 2 FR | 2020-13 | 5 FR-South E | 1 | 2 | #####  | ##### |
| 29 | 2 FR | 2020-13 | 5 FR-South E | 1 | 3 | #####  | ##### |
| 30 | 2 FR | 2020-13 | 5 FR-South E | 1 | 4 | #####  | ##### |
| 31 | 2 FR | 2020-13 | 5 FR-South E | 1 | 5 | #####  | ##### |
| 32 | 2 FR | 2020-13 | 5 FR-South E | 2 | 1 | #####  | ##### |
| 33 | 2 FR | 2020-13 | 5 FR-South E | 2 | 2 | #####  | ##### |
| 34 | 2 FR | 2020-13 | 5 FR-South E | 2 | 3 | #####  | ##### |
| 35 | 2 FR | 2020-13 | 5 FR-South E | 2 | 4 | 0.5    | ##### |
| 36 | 2 FR | 2020-13 | 5 FR-South E | 2 | 5 | #####  | ##### |
| 37 | 2 FR | 2020-13 | 5 FR-South E | 3 | 1 | #####  | ##### |
| 38 | 2 FR | 2020-13 | 5 FR-South E | 3 | 2 | 0.4375 | ##### |
| 39 | 2 FR | 2020-13 | 5 FR-South E | 3 | 3 | #####  | ##### |
| 40 | 2 FR | 2020-13 | 5 FR-South E | 3 | 4 | #####  | ##### |
| 41 | 2 FR | 2020-13 | 5 FR-South E | 3 | 5 | 0.7    | ##### |
| 42 | 2 FR | 2020-13 | 5 FR-South V | 1 | 1 | #####  | ##### |
| 43 | 2 FR | 2020-13 | 5 FR-South V | 1 | 2 | #####  | ##### |
| 44 | 2 FR | 2020-13 | 5 FR-South V | 1 | 3 | #####  | ##### |
| 45 | 2 FR | 2020-13 | 5 FR-South V | 1 | 4 | #####  | ##### |
| 46 | 2 FR | 2020-13 | 5 FR-South V | 1 | 5 | #####  | ##### |
| 47 | 2 FR | 2020-13 | 5 FR-South V | 2 | 1 | #####  | ##### |
| 48 | 2 FR | 2020-13 | 5 FR-South V | 2 | 2 | #####  | ##### |
| 49 | 2 FR | 2020-13 | 5 FR-South V | 2 | 3 | #####  | ##### |
| 50 | 2 FR | 2020-13 | 5 FR-South V | 2 | 4 | #####  | ##### |
| 51 | 2 FR | 2020-13 | 5 FR-South V | 2 | 5 | 0.375  | ##### |
| 52 | 2 FR | 2020-13 | 5 FR-South V | 3 | 1 | #####  | ##### |
| 53 | 2 FR | 2020-13 | 5 FR-South V | 3 | 2 | #####  | ##### |
| 54 | 2 FR | 2020-13 | 5 FR-South V | 3 | 3 | #####  | ##### |
| 55 | 2 FR | 2020-13 | 5 FR-South V | 3 | 4 | #####  | ##### |
| 56 | 2 FR | 2020-13 | 5 FR-South V | 3 | 5 | #####  | ##### |
| 57 | 2 FR | 2020-13 | 5 FR-South V | 3 | 5 | #####  | ##### |
| 58 | 2 FR | 2020-13 | 5 FR-West    | 1 | 1 | #####  | ##### |
| 59 | 2 FR | 2020-13 | 5 FR-West    | 1 | 2 | #####  | ##### |
| 60 | 2 FR | 2020-13 | 5 FR-West    | 1 | 2 | #####  | ##### |

|    |      |         |               |   |   |          |          |  |
|----|------|---------|---------------|---|---|----------|----------|--|
| 1  |      |         |               |   |   |          |          |  |
| 2  |      |         |               |   |   |          |          |  |
| 3  | 2 FR | 2020-13 | 5 FR-West     | 1 | 3 | #####    | #####    |  |
| 4  | 2 FR | 2020-13 | 5 FR-West     | 1 | 4 | #####    | #####    |  |
| 5  | 2 FR | 2020-13 | 5 FR-West     | 1 | 5 | #####    | #####    |  |
| 6  | 2 FR | 2020-13 | 5 FR-West     | 2 | 1 | #####    | #####    |  |
| 7  | 2 FR | 2020-13 | 5 FR-West     | 2 | 2 | #####    | #####    |  |
| 8  | 2 FR | 2020-13 | 5 FR-West     | 2 | 3 | #####    | #####    |  |
| 9  | 2 FR | 2020-13 | 5 FR-West     | 2 | 4 | #####    | #####    |  |
| 10 | 2 FR | 2020-13 | 5 FR-West     | 2 | 5 | #####    | #####    |  |
| 11 | 2 FR | 2020-13 | 5 FR-West     | 3 | 1 | #####    | #####    |  |
| 12 | 2 FR | 2020-13 | 5 FR-West     | 3 | 2 | 0.25     | #####    |  |
| 13 | 2 FR | 2020-13 | 5 FR-West     | 3 | 3 | #####    | #####    |  |
| 14 | 2 FR | 2020-13 | 5 FR-West     | 3 | 4 | #####    | #####    |  |
| 15 | 2 FR | 2020-13 | 5 FR-West     | 3 | 5 | #####    | #####    |  |
| 16 | 2 FR | 2020-14 | 1 FR-Corse    | 1 | 1 | 2.68225  | 1.207609 |  |
| 17 | 2 FR | 2020-14 | 1 FR-Corse    | 1 | 3 | 4.322993 | 1.759086 |  |
| 18 | 2 FR | 2020-14 | 1 FR-Corse    | 1 | 4 | 1        | #####    |  |
| 19 | 2 FR | 2020-14 | 1 FR-Corse    | 1 | 5 | 0        | 0        |  |
| 20 | 2 FR | 2020-14 | 1 FR-Corse    | 2 | 1 | 2.935928 | 1.612156 |  |
| 21 | 2 FR | 2020-14 | 1 FR-Corse    | 2 | 3 | 7        | 0        |  |
| 22 | 2 FR | 2020-14 | 1 FR-Corse    | 2 | 4 | 1        | #####    |  |
| 23 | 2 FR | 2020-14 | 1 FR-Corse    | 2 | 5 | 0        | 0        |  |
| 24 | 2 FR | 2020-14 | 1 FR-Corse    | 3 | 1 | 2        | 0        |  |
| 25 | 2 FR | 2020-14 | 1 FR-Corse    | 3 | 3 | 2        | 0        |  |
| 26 | 2 FR | 2020-14 | 1 FR-Ile de F | 1 | 1 | 2.34946  | #####    |  |
| 27 | 2 FR | 2020-14 | 1 FR-Ile de F | 1 | 2 | 2.389414 | #####    |  |
| 28 | 2 FR | 2020-14 | 1 FR-Ile de F | 1 | 3 | 2.435214 | #####    |  |
| 29 | 2 FR | 2020-14 | 1 FR-Ile de F | 1 | 4 | 2.707911 | #####    |  |
| 30 | 2 FR | 2020-14 | 1 FR-Ile de F | 1 | 5 | 1.343322 | #####    |  |
| 31 | 2 FR | 2020-14 | 1 FR-Ile de F | 2 | 1 | 2.593726 | #####    |  |
| 32 | 2 FR | 2020-14 | 1 FR-Ile de F | 2 | 2 | 2.37037  | #####    |  |
| 33 | 2 FR | 2020-14 | 1 FR-Ile de F | 2 | 3 | 3.08     | #####    |  |
| 34 | 2 FR | 2020-14 | 1 FR-Ile de F | 2 | 4 | 2.923077 | #####    |  |
| 35 | 2 FR | 2020-14 | 1 FR-Ile de F | 2 | 5 | 1.038462 | #####    |  |
| 36 | 2 FR | 2020-14 | 1 FR-Ile de F | 3 | 1 | 2.106545 | #####    |  |
| 37 | 2 FR | 2020-14 | 1 FR-Ile de F | 3 | 2 | 2.4      | #####    |  |
| 38 | 2 FR | 2020-14 | 1 FR-Ile de F | 3 | 3 | 1.88     | #####    |  |
| 39 | 2 FR | 2020-14 | 1 FR-Ile de F | 3 | 4 | 2.388889 | #####    |  |
| 40 | 2 FR | 2020-14 | 1 FR-Ile de F | 3 | 5 | 1.9      | #####    |  |
| 41 | 2 FR | 2020-14 | 1 FR-North E  | 1 | 1 | 2.982711 | #####    |  |
| 42 | 2 FR | 2020-14 | 1 FR-North E  | 1 | 2 | 2.368334 | #####    |  |
| 43 | 2 FR | 2020-14 | 1 FR-North E  | 1 | 3 | 4.206691 | #####    |  |
| 44 | 2 FR | 2020-14 | 1 FR-North E  | 1 | 4 | 3.365403 | #####    |  |
| 45 | 2 FR | 2020-14 | 1 FR-North E  | 1 | 5 | 1.283536 | #####    |  |
| 46 | 2 FR | 2020-14 | 1 FR-North E  | 2 | 1 | 2.691112 | #####    |  |
| 47 | 2 FR | 2020-14 | 1 FR-North E  | 2 | 2 | 2.607843 | #####    |  |
| 48 | 2 FR | 2020-14 | 1 FR-North E  | 2 | 3 | 3.534884 | #####    |  |
| 49 | 2 FR | 2020-14 | 1 FR-North E  | 2 | 4 | 3.018519 | #####    |  |
| 50 | 2 FR | 2020-14 | 1 FR-North E  | 2 | 5 | 1.357143 | #####    |  |
| 51 | 2 FR | 2020-14 | 1 FR-North E  | 3 | 1 | 3.304288 | #####    |  |
| 52 | 2 FR | 2020-14 | 1 FR-North E  | 3 | 2 | 2.136364 | #####    |  |
| 53 | 2 FR | 2020-14 | 1 FR-North E  | 3 | 3 | 4.875    | 1.285377 |  |
| 54 | 2 FR | 2020-14 | 1 FR-North E  | 3 | 4 | 3.75     | #####    |  |
| 55 | 2 FR | 2020-14 | 1 FR-North E  | 3 | 5 | 1.176471 | #####    |  |
| 56 | 2 FR | 2020-14 | 1 FR-Overall  | 1 | 1 | 2.56444  | #####    |  |
| 57 | 2 FR | 2020-14 | 1 FR-Overall  | 1 | 2 | 2.348396 | #####    |  |
| 58 | 2 FR | 2020-14 | 1 FR-Overall  | 1 | 3 | 3.285258 | #####    |  |
| 59 | 2 FR | 2020-14 | 1 FR-Overall  | 1 | 3 | 3.285258 | #####    |  |
| 60 | 2 FR | 2020-14 | 1 FR-Overall  | 1 | 3 | 3.285258 | #####    |  |

|    |      |         |              |   |   |          |          |  |
|----|------|---------|--------------|---|---|----------|----------|--|
| 1  |      |         |              |   |   |          |          |  |
| 2  |      |         |              |   |   |          |          |  |
| 3  | 2 FR | 2020-14 | 1 FR-Overall | 1 | 4 | 2.617664 | #####    |  |
| 4  | 2 FR | 2020-14 | 1 FR-Overall | 1 | 5 | 1.47812  | #####    |  |
| 5  | 2 FR | 2020-14 | 1 FR-Overall | 2 | 1 | 2.566115 | #####    |  |
| 6  | 2 FR | 2020-14 | 1 FR-Overall | 2 | 2 | 2.448113 | #####    |  |
| 7  | 2 FR | 2020-14 | 1 FR-Overall | 2 | 3 | 3.457211 | #####    |  |
| 8  | 2 FR | 2020-14 | 1 FR-Overall | 2 | 4 | 2.447165 | #####    |  |
| 9  | 2 FR | 2020-14 | 1 FR-Overall | 2 | 5 | 1.440672 | #####    |  |
| 10 | 2 FR | 2020-14 | 1 FR-Overall | 3 | 1 | 2.56255  | #####    |  |
| 11 | 2 FR | 2020-14 | 1 FR-Overall | 3 | 2 | 2.266633 | #####    |  |
| 12 | 2 FR | 2020-14 | 1 FR-Overall | 3 | 3 | 3.095864 | #####    |  |
| 13 | 2 FR | 2020-14 | 1 FR-Overall | 3 | 4 | 2.829518 | #####    |  |
| 14 | 2 FR | 2020-14 | 1 FR-Overall | 3 | 5 | 1.529844 | #####    |  |
| 15 | 2 FR | 2020-14 | 1 FR-South E | 1 | 1 | 2.598592 | #####    |  |
| 16 | 2 FR | 2020-14 | 1 FR-South E | 1 | 2 | 2.354128 | #####    |  |
| 17 | 2 FR | 2020-14 | 1 FR-South E | 1 | 3 | 3.24591  | #####    |  |
| 18 | 2 FR | 2020-14 | 1 FR-South E | 1 | 4 | 2.686993 | #####    |  |
| 19 | 2 FR | 2020-14 | 1 FR-South E | 1 | 5 | 1.817965 | #####    |  |
| 20 | 2 FR | 2020-14 | 1 FR-South E | 2 | 1 | 2.567865 | #####    |  |
| 21 | 2 FR | 2020-14 | 1 FR-South E | 2 | 2 | 2.622222 | #####    |  |
| 22 | 2 FR | 2020-14 | 1 FR-South E | 2 | 3 | 3.342105 | #####    |  |
| 23 | 2 FR | 2020-14 | 1 FR-South E | 2 | 4 | 2.125    | #####    |  |
| 24 | 2 FR | 2020-14 | 1 FR-South E | 2 | 5 | 2        | #####    |  |
| 25 | 2 FR | 2020-14 | 1 FR-South E | 3 | 1 | 2.639813 | #####    |  |
| 26 | 2 FR | 2020-14 | 1 FR-South E | 3 | 2 | 2.105263 | #####    |  |
| 27 | 2 FR | 2020-14 | 1 FR-South E | 3 | 3 | 3.12     | #####    |  |
| 28 | 2 FR | 2020-14 | 1 FR-South E | 3 | 4 | 3.521739 | 1.151873 |  |
| 29 | 2 FR | 2020-14 | 1 FR-South E | 3 | 5 | 1.5      | #####    |  |
| 30 | 2 FR | 2020-14 | 1 FR-South V | 1 | 1 | 2.20074  | #####    |  |
| 31 | 2 FR | 2020-14 | 1 FR-South V | 1 | 2 | 2.048863 | #####    |  |
| 32 | 2 FR | 2020-14 | 1 FR-South V | 1 | 3 | 2.546996 | #####    |  |
| 33 | 2 FR | 2020-14 | 1 FR-South V | 1 | 4 | 2.397356 | #####    |  |
| 34 | 2 FR | 2020-14 | 1 FR-South V | 1 | 5 | 1.581499 | #####    |  |
| 35 | 2 FR | 2020-14 | 1 FR-South V | 2 | 1 | 2.406705 | #####    |  |
| 36 | 2 FR | 2020-14 | 1 FR-South V | 2 | 2 | 2.189189 | #####    |  |
| 37 | 2 FR | 2020-14 | 1 FR-South V | 2 | 3 | 3.268041 | #####    |  |
| 38 | 2 FR | 2020-14 | 1 FR-South V | 2 | 4 | 2.390244 | #####    |  |
| 39 | 2 FR | 2020-14 | 1 FR-South V | 2 | 5 | 1.25     | #####    |  |
| 40 | 2 FR | 2020-14 | 1 FR-South V | 3 | 1 | 1.959301 | #####    |  |
| 41 | 2 FR | 2020-14 | 1 FR-South V | 3 | 2 | 1.923077 | #####    |  |
| 42 | 2 FR | 2020-14 | 1 FR-South V | 3 | 3 | 1.555556 | #####    |  |
| 43 | 2 FR | 2020-14 | 1 FR-South V | 3 | 4 | 2.40625  | #####    |  |
| 44 | 2 FR | 2020-14 | 1 FR-South V | 3 | 5 | 1.923077 | #####    |  |
| 45 | 2 FR | 2020-14 | 1 FR-West    | 1 | 1 | 2.678539 | #####    |  |
| 46 | 2 FR | 2020-14 | 1 FR-West    | 1 | 2 | 2.52492  | #####    |  |
| 47 | 2 FR | 2020-14 | 1 FR-West    | 1 | 3 | 4.156939 | #####    |  |
| 48 | 2 FR | 2020-14 | 1 FR-West    | 1 | 4 | 2.143264 | #####    |  |
| 49 | 2 FR | 2020-14 | 1 FR-West    | 1 | 5 | 1.306501 | #####    |  |
| 50 | 2 FR | 2020-14 | 1 FR-West    | 2 | 1 | 2.562099 | #####    |  |
| 51 | 2 FR | 2020-14 | 1 FR-West    | 2 | 2 | 2.327273 | #####    |  |
| 52 | 2 FR | 2020-14 | 1 FR-West    | 2 | 3 | 3.975309 | #####    |  |
| 53 | 2 FR | 2020-14 | 1 FR-West    | 2 | 4 | 1.95082  | #####    |  |
| 54 | 2 FR | 2020-14 | 1 FR-West    | 2 | 5 | 1.363636 | #####    |  |
| 55 | 2 FR | 2020-14 | 1 FR-West    | 3 | 1 | 2.800079 | #####    |  |
| 56 | 2 FR | 2020-14 | 1 FR-West    | 3 | 2 | 2.684211 | #####    |  |
| 57 | 2 FR | 2020-14 | 1 FR-West    | 3 | 3 | 4.37037  | 1.195849 |  |
| 58 | 2 FR | 2020-14 | 1 FR-West    | 3 | 4 | 2.322581 | #####    |  |
| 59 | 2 FR | 2020-14 | 1 FR-West    | 3 |   |          |          |  |
| 60 | 2 FR | 2020-14 | 1 FR-West    | 3 |   |          |          |  |

|    |      |         |               |   |   |          |       |  |
|----|------|---------|---------------|---|---|----------|-------|--|
| 1  |      |         |               |   |   |          |       |  |
| 2  |      |         |               |   |   |          |       |  |
| 3  | 2 FR | 2020-14 | 1 FR-West     | 3 | 5 | 1.235294 | ##### |  |
| 4  | 2 FR | 2020-14 | 2 FR-Corse    | 1 | 1 | 1.741446 | ##### |  |
| 5  | 2 FR | 2020-14 | 2 FR-Corse    | 1 | 3 | 2.464599 | ##### |  |
| 6  | 2 FR | 2020-14 | 2 FR-Corse    | 1 | 4 | 1        | ##### |  |
| 7  | 2 FR | 2020-14 | 2 FR-Corse    | 1 | 5 | 0        | 0     |  |
| 8  | 2 FR | 2020-14 | 2 FR-Corse    | 2 | 1 | 1.645309 | ##### |  |
| 9  | 2 FR | 2020-14 | 2 FR-Corse    | 2 | 3 | 3        | 0     |  |
| 10 | 2 FR | 2020-14 | 2 FR-Corse    | 2 | 4 | 1        | ##### |  |
| 11 | 2 FR | 2020-14 | 2 FR-Corse    | 2 | 5 | 0        | 0     |  |
| 12 | 2 FR | 2020-14 | 2 FR-Corse    | 3 | 1 | 2        | 0     |  |
| 13 | 2 FR | 2020-14 | 2 FR-Corse    | 3 | 3 | 2        | 0     |  |
| 14 | 2 FR | 2020-14 | 2 FR-Ile de F | 1 | 1 | 1.383967 | ##### |  |
| 15 | 2 FR | 2020-14 | 2 FR-Ile de F | 1 | 2 | 1.879816 | ##### |  |
| 16 | 2 FR | 2020-14 | 2 FR-Ile de F | 1 | 3 | 1.331191 | ##### |  |
| 17 | 2 FR | 2020-14 | 2 FR-Ile de F | 1 | 4 | 1.374052 | ##### |  |
| 18 | 2 FR | 2020-14 | 2 FR-Ile de F | 1 | 5 | #####    | ##### |  |
| 19 | 2 FR | 2020-14 | 2 FR-Ile de F | 2 | 1 | 1.479978 | ##### |  |
| 20 | 2 FR | 2020-14 | 2 FR-Ile de F | 2 | 2 | 2.096774 | ##### |  |
| 21 | 2 FR | 2020-14 | 2 FR-Ile de F | 2 | 3 | 1.679245 | ##### |  |
| 22 | 2 FR | 2020-14 | 2 FR-Ile de F | 2 | 4 | 1.396226 | ##### |  |
| 23 | 2 FR | 2020-14 | 2 FR-Ile de F | 2 | 5 | #####    | ##### |  |
| 24 | 2 FR | 2020-14 | 2 FR-Ile de F | 3 | 1 | 1.293045 | ##### |  |
| 25 | 2 FR | 2020-14 | 2 FR-Ile de F | 3 | 2 | 1.75     | ##### |  |
| 26 | 2 FR | 2020-14 | 2 FR-Ile de F | 3 | 3 | 1.037037 | ##### |  |
| 27 | 2 FR | 2020-14 | 2 FR-Ile de F | 3 | 4 | 1.347826 | ##### |  |
| 28 | 2 FR | 2020-14 | 2 FR-Ile de F | 3 | 5 | 1.272727 | ##### |  |
| 29 | 2 FR | 2020-14 | 2 FR-North E  | 1 | 1 | 1.472464 | ##### |  |
| 30 | 2 FR | 2020-14 | 2 FR-North E  | 1 | 2 | 1.83671  | ##### |  |
| 31 | 2 FR | 2020-14 | 2 FR-North E  | 1 | 3 | 1.682038 | ##### |  |
| 32 | 2 FR | 2020-14 | 2 FR-North E  | 1 | 4 | 1.469184 | ##### |  |
| 33 | 2 FR | 2020-14 | 2 FR-North E  | 1 | 5 | #####    | ##### |  |
| 34 | 2 FR | 2020-14 | 2 FR-North E  | 2 | 1 | 1.460113 | ##### |  |
| 35 | 2 FR | 2020-14 | 2 FR-North E  | 2 | 2 | 1.927273 | ##### |  |
| 36 | 2 FR | 2020-14 | 2 FR-North E  | 2 | 3 | 1.816327 | ##### |  |
| 37 | 2 FR | 2020-14 | 2 FR-North E  | 2 | 4 | 1.298246 | ##### |  |
| 38 | 2 FR | 2020-14 | 2 FR-North E  | 2 | 5 | #####    | ##### |  |
| 39 | 2 FR | 2020-14 | 2 FR-North E  | 3 | 1 | 1.486164 | ##### |  |
| 40 | 2 FR | 2020-14 | 2 FR-North E  | 3 | 2 | 1.75     | ##### |  |
| 41 | 2 FR | 2020-14 | 2 FR-North E  | 3 | 3 | 1.542857 | ##### |  |
| 42 | 2 FR | 2020-14 | 2 FR-North E  | 3 | 4 | 1.653846 | ##### |  |
| 43 | 2 FR | 2020-14 | 2 FR-North E  | 3 | 5 | #####    | ##### |  |
| 44 | 2 FR | 2020-14 | 2 FR-Overall  | 1 | 1 | 1.342553 | ##### |  |
| 45 | 2 FR | 2020-14 | 2 FR-Overall  | 1 | 2 | 1.776997 | ##### |  |
| 46 | 2 FR | 2020-14 | 2 FR-Overall  | 1 | 3 | 1.461779 | ##### |  |
| 47 | 2 FR | 2020-14 | 2 FR-Overall  | 1 | 4 | 1.232829 | ##### |  |
| 48 | 2 FR | 2020-14 | 2 FR-Overall  | 1 | 5 | #####    | ##### |  |
| 49 | 2 FR | 2020-14 | 2 FR-Overall  | 2 | 1 | 1.40392  | ##### |  |
| 50 | 2 FR | 2020-14 | 2 FR-Overall  | 2 | 2 | 1.817047 | ##### |  |
| 51 | 2 FR | 2020-14 | 2 FR-Overall  | 2 | 3 | 1.729587 | ##### |  |
| 52 | 2 FR | 2020-14 | 2 FR-Overall  | 2 | 4 | 1.252527 | ##### |  |
| 53 | 2 FR | 2020-14 | 2 FR-Overall  | 2 | 5 | #####    | ##### |  |
| 54 | 2 FR | 2020-14 | 2 FR-Overall  | 3 | 1 | 1.274579 | ##### |  |
| 55 | 2 FR | 2020-14 | 2 FR-Overall  | 3 | 2 | 1.744192 | ##### |  |
| 56 | 2 FR | 2020-14 | 2 FR-Overall  | 3 | 3 | 1.174446 | ##### |  |
| 57 | 2 FR | 2020-14 | 2 FR-Overall  | 3 | 4 | 1.209123 | ##### |  |
| 58 | 2 FR | 2020-14 | 2 FR-Overall  | 3 | 5 | 1.011565 | ##### |  |
| 59 | 2 FR | 2020-14 | 2 FR-Overall  | 3 |   |          |       |  |
| 60 | 2 FR | 2020-14 | 2 FR-Overall  | 3 |   |          |       |  |

|    |      |         |               |   |   |          |       |  |  |
|----|------|---------|---------------|---|---|----------|-------|--|--|
| 1  |      |         |               |   |   |          |       |  |  |
| 2  |      |         |               |   |   |          |       |  |  |
| 3  | 2 FR | 2020-14 | 2 FR-South E  | 1 | 1 | 1.358826 | ##### |  |  |
| 4  | 2 FR | 2020-14 | 2 FR-South E  | 1 | 2 | 1.65251  | ##### |  |  |
| 5  | 2 FR | 2020-14 | 2 FR-South E  | 1 | 3 | 1.558601 | ##### |  |  |
| 6  | 2 FR | 2020-14 | 2 FR-South E  | 1 | 4 | 1.236968 | ##### |  |  |
| 7  | 2 FR | 2020-14 | 2 FR-South E  | 1 | 5 | #####    | ##### |  |  |
| 8  | 2 FR | 2020-14 | 2 FR-South E  | 2 | 1 | 1.382904 | ##### |  |  |
| 9  | 2 FR | 2020-14 | 2 FR-South E  | 2 | 2 | 1.708333 | ##### |  |  |
| 10 | 2 FR | 2020-14 | 2 FR-South E  | 2 | 3 | 1.679012 | ##### |  |  |
| 11 | 2 FR | 2020-14 | 2 FR-South E  | 2 | 4 | 1.267606 | ##### |  |  |
| 12 | 2 FR | 2020-14 | 2 FR-South E  | 2 | 5 | #####    | ##### |  |  |
| 13 | 2 FR | 2020-14 | 2 FR-South E  | 3 | 1 | 1.327714 | ##### |  |  |
| 14 | 2 FR | 2020-14 | 2 FR-South E  | 3 | 2 | 1.6      | ##### |  |  |
| 15 | 2 FR | 2020-14 | 2 FR-South E  | 3 | 3 | 1.413793 | ##### |  |  |
| 16 | 2 FR | 2020-14 | 2 FR-South E  | 3 | 4 | 1.192308 | ##### |  |  |
| 17 | 2 FR | 2020-14 | 2 FR-South E  | 3 | 5 | 1        | ##### |  |  |
| 18 | 2 FR | 2020-14 | 2 FR-South V  | 1 | 1 | 1.270167 | ##### |  |  |
| 19 | 2 FR | 2020-14 | 2 FR-South V  | 1 | 2 | 1.904331 | ##### |  |  |
| 20 | 2 FR | 2020-14 | 2 FR-South V  | 1 | 3 | 1.376719 | ##### |  |  |
| 21 | 2 FR | 2020-14 | 2 FR-South V  | 1 | 4 | 1.114256 | ##### |  |  |
| 22 | 2 FR | 2020-14 | 2 FR-South V  | 1 | 5 | #####    | ##### |  |  |
| 23 | 2 FR | 2020-14 | 2 FR-South V  | 2 | 1 | 1.425103 | ##### |  |  |
| 24 | 2 FR | 2020-14 | 2 FR-South V  | 2 | 2 | 1.878049 | ##### |  |  |
| 25 | 2 FR | 2020-14 | 2 FR-South V  | 2 | 3 | 1.823009 | ##### |  |  |
| 26 | 2 FR | 2020-14 | 2 FR-South V  | 2 | 4 | 1.252874 | ##### |  |  |
| 27 | 2 FR | 2020-14 | 2 FR-South V  | 2 | 5 | #####    | ##### |  |  |
| 28 | 2 FR | 2020-14 | 2 FR-South V  | 3 | 1 | 1.0838   | ##### |  |  |
| 29 | 2 FR | 2020-14 | 2 FR-South V  | 3 | 2 | 1.928571 | ##### |  |  |
| 30 | 2 FR | 2020-14 | 2 FR-South V  | 3 | 3 | #####    | ##### |  |  |
| 31 | 2 FR | 2020-14 | 2 FR-South V  | 3 | 4 | #####    | ##### |  |  |
| 32 | 2 FR | 2020-14 | 2 FR-South V  | 3 | 5 | 1.111111 | ##### |  |  |
| 33 | 2 FR | 2020-14 | 2 FR-South V  | 3 | 5 | 1.111111 | ##### |  |  |
| 34 | 2 FR | 2020-14 | 2 FR-West     | 1 | 1 | 1.220369 | ##### |  |  |
| 35 | 2 FR | 2020-14 | 2 FR-West     | 1 | 2 | 1.62377  | ##### |  |  |
| 36 | 2 FR | 2020-14 | 2 FR-West     | 1 | 3 | 1.356031 | ##### |  |  |
| 37 | 2 FR | 2020-14 | 2 FR-West     | 1 | 4 | 1.048342 | ##### |  |  |
| 38 | 2 FR | 2020-14 | 2 FR-West     | 1 | 5 | #####    | ##### |  |  |
| 39 | 2 FR | 2020-14 | 2 FR-West     | 2 | 1 | 1.264764 | ##### |  |  |
| 40 | 2 FR | 2020-14 | 2 FR-West     | 2 | 2 | 1.482759 | ##### |  |  |
| 41 | 2 FR | 2020-14 | 2 FR-West     | 2 | 3 | 1.593407 | ##### |  |  |
| 42 | 2 FR | 2020-14 | 2 FR-West     | 2 | 4 | 1.09589  | ##### |  |  |
| 43 | 2 FR | 2020-14 | 2 FR-West     | 2 | 5 | #####    | ##### |  |  |
| 44 | 2 FR | 2020-14 | 2 FR-West     | 3 | 1 | 1.175666 | ##### |  |  |
| 45 | 2 FR | 2020-14 | 2 FR-West     | 3 | 2 | 1.727273 | ##### |  |  |
| 46 | 2 FR | 2020-14 | 2 FR-West     | 3 | 3 | 1.114286 | ##### |  |  |
| 47 | 2 FR | 2020-14 | 2 FR-West     | 3 | 4 | 1        | ##### |  |  |
| 48 | 2 FR | 2020-14 | 2 FR-West     | 3 | 5 | #####    | ##### |  |  |
| 49 | 2 FR | 2020-14 | 3 FR-Corse    | 1 | 1 | 0        | 0     |  |  |
| 50 | 2 FR | 2020-14 | 3 FR-Corse    | 1 | 3 | 0        | 0     |  |  |
| 51 | 2 FR | 2020-14 | 3 FR-Corse    | 1 | 4 | 0        | 0     |  |  |
| 52 | 2 FR | 2020-14 | 3 FR-Corse    | 1 | 5 | 0        | 0     |  |  |
| 53 | 2 FR | 2020-14 | 3 FR-Corse    | 2 | 1 | 0        | 0     |  |  |
| 54 | 2 FR | 2020-14 | 3 FR-Corse    | 2 | 3 | 0        | 0     |  |  |
| 55 | 2 FR | 2020-14 | 3 FR-Corse    | 2 | 4 | 0        | 0     |  |  |
| 56 | 2 FR | 2020-14 | 3 FR-Corse    | 2 | 5 | 0        | 0     |  |  |
| 57 | 2 FR | 2020-14 | 3 FR-Corse    | 3 | 1 | 0        | 0     |  |  |
| 58 | 2 FR | 2020-14 | 3 FR-Corse    | 3 | 3 | 0        | 0     |  |  |
| 59 | 2 FR | 2020-14 | 3 FR-Corse    | 3 | 3 | 0        | 0     |  |  |
| 60 | 2 FR | 2020-14 | 3 FR-Ile de F | 1 | 1 | 0        | 0     |  |  |



|    |      |         |               |   |   |   |   |
|----|------|---------|---------------|---|---|---|---|
| 1  |      |         |               |   |   |   |   |
| 2  |      |         |               |   |   |   |   |
| 3  | 2 FR | 2020-14 | 3 FR-Ile de F | 1 | 2 | 0 | 0 |
| 4  | 2 FR | 2020-14 | 3 FR-Ile de F | 1 | 3 | 0 | 0 |
| 5  | 2 FR | 2020-14 | 3 FR-Ile de F | 1 | 4 | 0 | 0 |
| 6  | 2 FR | 2020-14 | 3 FR-Ile de F | 1 | 5 | 0 | 0 |
| 7  | 2 FR | 2020-14 | 3 FR-Ile de F | 2 | 1 | 0 | 0 |
| 8  | 2 FR | 2020-14 | 3 FR-Ile de F | 2 | 2 | 0 | 0 |
| 9  | 2 FR | 2020-14 | 3 FR-Ile de F | 2 | 3 | 0 | 0 |
| 10 | 2 FR | 2020-14 | 3 FR-Ile de F | 2 | 4 | 0 | 0 |
| 11 | 2 FR | 2020-14 | 3 FR-Ile de F | 2 | 5 | 0 | 0 |
| 12 | 2 FR | 2020-14 | 3 FR-Ile de F | 3 | 1 | 0 | 0 |
| 13 | 2 FR | 2020-14 | 3 FR-Ile de F | 3 | 2 | 0 | 0 |
| 14 | 2 FR | 2020-14 | 3 FR-Ile de F | 3 | 3 | 0 | 0 |
| 15 | 2 FR | 2020-14 | 3 FR-Ile de F | 3 | 4 | 0 | 0 |
| 16 | 2 FR | 2020-14 | 3 FR-Ile de F | 3 | 5 | 0 | 0 |
| 17 | 2 FR | 2020-14 | 3 FR-North E  | 1 | 1 | 0 | 0 |
| 18 | 2 FR | 2020-14 | 3 FR-North E  | 1 | 2 | 0 | 0 |
| 19 | 2 FR | 2020-14 | 3 FR-North E  | 1 | 3 | 0 | 0 |
| 20 | 2 FR | 2020-14 | 3 FR-North E  | 1 | 4 | 0 | 0 |
| 21 | 2 FR | 2020-14 | 3 FR-North E  | 1 | 5 | 0 | 0 |
| 22 | 2 FR | 2020-14 | 3 FR-North E  | 2 | 1 | 0 | 0 |
| 23 | 2 FR | 2020-14 | 3 FR-North E  | 2 | 2 | 0 | 0 |
| 24 | 2 FR | 2020-14 | 3 FR-North E  | 2 | 3 | 0 | 0 |
| 25 | 2 FR | 2020-14 | 3 FR-North E  | 2 | 4 | 0 | 0 |
| 26 | 2 FR | 2020-14 | 3 FR-North E  | 2 | 5 | 0 | 0 |
| 27 | 2 FR | 2020-14 | 3 FR-North E  | 3 | 1 | 0 | 0 |
| 28 | 2 FR | 2020-14 | 3 FR-North E  | 3 | 2 | 0 | 0 |
| 29 | 2 FR | 2020-14 | 3 FR-North E  | 3 | 3 | 0 | 0 |
| 30 | 2 FR | 2020-14 | 3 FR-North E  | 3 | 4 | 0 | 0 |
| 31 | 2 FR | 2020-14 | 3 FR-North E  | 3 | 5 | 0 | 0 |
| 32 | 2 FR | 2020-14 | 3 FR-Overall  | 1 | 1 | 0 | 0 |
| 33 | 2 FR | 2020-14 | 3 FR-Overall  | 1 | 2 | 0 | 0 |
| 34 | 2 FR | 2020-14 | 3 FR-Overall  | 1 | 3 | 0 | 0 |
| 35 | 2 FR | 2020-14 | 3 FR-Overall  | 1 | 4 | 0 | 0 |
| 36 | 2 FR | 2020-14 | 3 FR-Overall  | 1 | 5 | 0 | 0 |
| 37 | 2 FR | 2020-14 | 3 FR-Overall  | 2 | 1 | 0 | 0 |
| 38 | 2 FR | 2020-14 | 3 FR-Overall  | 2 | 2 | 0 | 0 |
| 39 | 2 FR | 2020-14 | 3 FR-Overall  | 2 | 3 | 0 | 0 |
| 40 | 2 FR | 2020-14 | 3 FR-Overall  | 2 | 4 | 0 | 0 |
| 41 | 2 FR | 2020-14 | 3 FR-Overall  | 2 | 5 | 0 | 0 |
| 42 | 2 FR | 2020-14 | 3 FR-Overall  | 3 | 1 | 0 | 0 |
| 43 | 2 FR | 2020-14 | 3 FR-Overall  | 3 | 2 | 0 | 0 |
| 44 | 2 FR | 2020-14 | 3 FR-Overall  | 3 | 3 | 0 | 0 |
| 45 | 2 FR | 2020-14 | 3 FR-Overall  | 3 | 4 | 0 | 0 |
| 46 | 2 FR | 2020-14 | 3 FR-Overall  | 3 | 5 | 0 | 0 |
| 47 | 2 FR | 2020-14 | 3 FR-South E  | 1 | 1 | 0 | 0 |
| 48 | 2 FR | 2020-14 | 3 FR-South E  | 1 | 2 | 0 | 0 |
| 49 | 2 FR | 2020-14 | 3 FR-South E  | 1 | 3 | 0 | 0 |
| 50 | 2 FR | 2020-14 | 3 FR-South E  | 1 | 4 | 0 | 0 |
| 51 | 2 FR | 2020-14 | 3 FR-South E  | 1 | 5 | 0 | 0 |
| 52 | 2 FR | 2020-14 | 3 FR-South E  | 2 | 1 | 0 | 0 |
| 53 | 2 FR | 2020-14 | 3 FR-South E  | 2 | 2 | 0 | 0 |
| 54 | 2 FR | 2020-14 | 3 FR-South E  | 2 | 3 | 0 | 0 |
| 55 | 2 FR | 2020-14 | 3 FR-South E  | 2 | 4 | 0 | 0 |
| 56 | 2 FR | 2020-14 | 3 FR-South E  | 2 | 5 | 0 | 0 |
| 57 | 2 FR | 2020-14 | 3 FR-South E  | 3 | 1 | 0 | 0 |
| 58 | 2 FR | 2020-14 | 3 FR-South E  | 3 | 2 | 0 | 0 |
| 59 | 2 FR | 2020-14 | 3 FR-South E  | 3 | 3 | 0 | 0 |
| 60 | 2 FR | 2020-14 | 3 FR-South E  | 3 | 4 | 0 | 0 |

|    |      |         |               |   |   |          |          |  |
|----|------|---------|---------------|---|---|----------|----------|--|
| 1  |      |         |               |   |   |          |          |  |
| 2  |      |         |               |   |   |          |          |  |
| 3  | 2 FR | 2020-14 | 3 FR-South E  | 3 | 3 | 0        | 0        |  |
| 4  | 2 FR | 2020-14 | 3 FR-South E  | 3 | 4 | 0        | 0        |  |
| 5  | 2 FR | 2020-14 | 3 FR-South E  | 3 | 5 | 0        | 0        |  |
| 6  | 2 FR | 2020-14 | 3 FR-South V  | 1 | 1 | 0        | 0        |  |
| 7  | 2 FR | 2020-14 | 3 FR-South V  | 1 | 2 | 0        | 0        |  |
| 8  | 2 FR | 2020-14 | 3 FR-South V  | 1 | 3 | 0        | 0        |  |
| 9  | 2 FR | 2020-14 | 3 FR-South V  | 1 | 4 | 0        | 0        |  |
| 10 | 2 FR | 2020-14 | 3 FR-South V  | 1 | 5 | 0        | 0        |  |
| 11 | 2 FR | 2020-14 | 3 FR-South V  | 2 | 1 | 0        | 0        |  |
| 12 | 2 FR | 2020-14 | 3 FR-South V  | 2 | 2 | 0        | 0        |  |
| 13 | 2 FR | 2020-14 | 3 FR-South V  | 2 | 3 | 0        | 0        |  |
| 14 | 2 FR | 2020-14 | 3 FR-South V  | 2 | 4 | 0        | 0        |  |
| 15 | 2 FR | 2020-14 | 3 FR-South V  | 2 | 5 | 0        | 0        |  |
| 16 | 2 FR | 2020-14 | 3 FR-South V  | 3 | 1 | 0        | 0        |  |
| 17 | 2 FR | 2020-14 | 3 FR-South V  | 3 | 2 | 0        | 0        |  |
| 18 | 2 FR | 2020-14 | 3 FR-South V  | 3 | 3 | 0        | 0        |  |
| 19 | 2 FR | 2020-14 | 3 FR-South V  | 3 | 4 | 0        | 0        |  |
| 20 | 2 FR | 2020-14 | 3 FR-South V  | 3 | 5 | 0        | 0        |  |
| 21 | 2 FR | 2020-14 | 3 FR-South V  | 3 | 5 | 0        | 0        |  |
| 22 | 2 FR | 2020-14 | 3 FR-West     | 1 | 1 | 0        | 0        |  |
| 23 | 2 FR | 2020-14 | 3 FR-West     | 1 | 2 | 0        | 0        |  |
| 24 | 2 FR | 2020-14 | 3 FR-West     | 1 | 3 | 0        | 0        |  |
| 25 | 2 FR | 2020-14 | 3 FR-West     | 1 | 4 | 0        | 0        |  |
| 26 | 2 FR | 2020-14 | 3 FR-West     | 1 | 5 | 0        | 0        |  |
| 27 | 2 FR | 2020-14 | 3 FR-West     | 2 | 1 | 0        | 0        |  |
| 28 | 2 FR | 2020-14 | 3 FR-West     | 2 | 2 | 0        | 0        |  |
| 29 | 2 FR | 2020-14 | 3 FR-West     | 2 | 3 | 0        | 0        |  |
| 30 | 2 FR | 2020-14 | 3 FR-West     | 2 | 4 | 0        | 0        |  |
| 31 | 2 FR | 2020-14 | 3 FR-West     | 2 | 5 | 0        | 0        |  |
| 32 | 2 FR | 2020-14 | 3 FR-West     | 3 | 1 | 0        | 0        |  |
| 33 | 2 FR | 2020-14 | 3 FR-West     | 3 | 2 | 0        | 0        |  |
| 34 | 2 FR | 2020-14 | 3 FR-West     | 3 | 3 | 0        | 0        |  |
| 35 | 2 FR | 2020-14 | 3 FR-West     | 3 | 4 | 0        | 0        |  |
| 36 | 2 FR | 2020-14 | 3 FR-West     | 3 | 5 | 0        | 0        |  |
| 37 | 2 FR | 2020-14 | 4 FR-Corse    | 1 | 1 | #####    | #####    |  |
| 38 | 2 FR | 2020-14 | 4 FR-Corse    | 1 | 3 | 1.858395 | 1.407268 |  |
| 39 | 2 FR | 2020-14 | 4 FR-Corse    | 1 | 4 | 0        | 0        |  |
| 40 | 2 FR | 2020-14 | 4 FR-Corse    | 1 | 5 | 0        | 0        |  |
| 41 | 2 FR | 2020-14 | 4 FR-Corse    | 2 | 1 | #####    | #####    |  |
| 42 | 2 FR | 2020-14 | 4 FR-Corse    | 2 | 3 | 4        | 0        |  |
| 43 | 2 FR | 2020-14 | 4 FR-Corse    | 2 | 4 | 0        | 0        |  |
| 44 | 2 FR | 2020-14 | 4 FR-Corse    | 2 | 5 | 0        | 0        |  |
| 45 | 2 FR | 2020-14 | 4 FR-Corse    | 3 | 1 | 0        | 0        |  |
| 46 | 2 FR | 2020-14 | 4 FR-Corse    | 3 | 3 | 0        | 0        |  |
| 47 | 2 FR | 2020-14 | 4 FR-Ile de F | 1 | 1 | #####    | #####    |  |
| 48 | 2 FR | 2020-14 | 4 FR-Ile de F | 1 | 2 | #####    | #####    |  |
| 49 | 2 FR | 2020-14 | 4 FR-Ile de F | 1 | 3 | #####    | #####    |  |
| 50 | 2 FR | 2020-14 | 4 FR-Ile de F | 1 | 4 | #####    | #####    |  |
| 51 | 2 FR | 2020-14 | 4 FR-Ile de F | 1 | 5 | #####    | #####    |  |
| 52 | 2 FR | 2020-14 | 4 FR-Ile de F | 2 | 1 | #####    | #####    |  |
| 53 | 2 FR | 2020-14 | 4 FR-Ile de F | 2 | 2 | #####    | #####    |  |
| 54 | 2 FR | 2020-14 | 4 FR-Ile de F | 2 | 3 | 1.054545 | #####    |  |
| 55 | 2 FR | 2020-14 | 4 FR-Ile de F | 2 | 4 | #####    | #####    |  |
| 56 | 2 FR | 2020-14 | 4 FR-Ile de F | 2 | 5 | 0        | 0        |  |
| 57 | 2 FR | 2020-14 | 4 FR-Ile de F | 3 | 1 | #####    | #####    |  |
| 58 | 2 FR | 2020-14 | 4 FR-Ile de F | 3 | 2 | 0        | 0        |  |
| 59 | 2 FR | 2020-14 | 4 FR-Ile de F | 3 | 3 | #####    | #####    |  |
| 60 | 2 FR | 2020-14 | 4 FR-Ile de F | 3 | 3 | #####    | #####    |  |

|    |      |         |               |   |   |          |          |
|----|------|---------|---------------|---|---|----------|----------|
| 1  |      |         |               |   |   |          |          |
| 2  |      |         |               |   |   |          |          |
| 3  | 2 FR | 2020-14 | 4 FR-Ile de F | 3 | 4 | #####    | #####    |
| 4  | 2 FR | 2020-14 | 4 FR-Ile de F | 3 | 5 | #####    | #####    |
| 5  | 2 FR | 2020-14 | 4 FR-North E  | 1 | 1 | 1.205648 | #####    |
| 6  | 2 FR | 2020-14 | 4 FR-North E  | 1 | 2 | #####    | #####    |
| 7  | 2 FR | 2020-14 | 4 FR-North E  | 1 | 3 | 1.995159 | #####    |
| 8  | 2 FR | 2020-14 | 4 FR-North E  | 1 | 4 | 1.742371 | #####    |
| 9  | 2 FR | 2020-14 | 4 FR-North E  | 1 | 5 | #####    | #####    |
| 10 | 2 FR | 2020-14 | 4 FR-North E  | 2 | 1 | #####    | #####    |
| 11 | 2 FR | 2020-14 | 4 FR-North E  | 2 | 2 | 0.5      | #####    |
| 12 | 2 FR | 2020-14 | 4 FR-North E  | 2 | 3 | 1.219048 | #####    |
| 13 | 2 FR | 2020-14 | 4 FR-North E  | 2 | 4 | 1.568966 | #####    |
| 14 | 2 FR | 2020-14 | 4 FR-North E  | 2 | 5 | 0.375    | #####    |
| 15 | 2 FR | 2020-14 | 4 FR-North E  | 3 | 1 | 1.486775 | #####    |
| 16 | 2 FR | 2020-14 | 4 FR-North E  | 3 | 2 | #####    | #####    |
| 17 | 2 FR | 2020-14 | 4 FR-North E  | 3 | 3 | 2.882353 | 1.101201 |
| 18 | 2 FR | 2020-14 | 4 FR-North E  | 3 | 4 | 1.925926 | #####    |
| 19 | 2 FR | 2020-14 | 4 FR-North E  | 3 | 5 | 0        | 0        |
| 20 | 2 FR | 2020-14 | 4 FR-Overall  | 1 | 1 | #####    | #####    |
| 21 | 2 FR | 2020-14 | 4 FR-Overall  | 1 | 2 | #####    | #####    |
| 22 | 2 FR | 2020-14 | 4 FR-Overall  | 1 | 3 | 1.390003 | #####    |
| 23 | 2 FR | 2020-14 | 4 FR-Overall  | 1 | 4 | #####    | #####    |
| 24 | 2 FR | 2020-14 | 4 FR-Overall  | 1 | 5 | #####    | #####    |
| 25 | 2 FR | 2020-14 | 4 FR-Overall  | 2 | 1 | #####    | #####    |
| 26 | 2 FR | 2020-14 | 4 FR-Overall  | 2 | 2 | #####    | #####    |
| 27 | 2 FR | 2020-14 | 4 FR-Overall  | 2 | 3 | 1.410815 | #####    |
| 28 | 2 FR | 2020-14 | 4 FR-Overall  | 2 | 4 | #####    | #####    |
| 29 | 2 FR | 2020-14 | 4 FR-Overall  | 2 | 5 | #####    | #####    |
| 30 | 2 FR | 2020-14 | 4 FR-Overall  | 3 | 1 | #####    | #####    |
| 31 | 2 FR | 2020-14 | 4 FR-Overall  | 3 | 2 | #####    | #####    |
| 32 | 2 FR | 2020-14 | 4 FR-Overall  | 3 | 3 | 1.366299 | 0.332743 |
| 33 | 2 FR | 2020-14 | 4 FR-Overall  | 3 | 4 | 1.129975 | #####    |
| 34 | 2 FR | 2020-14 | 4 FR-Overall  | 3 | 5 | #####    | #####    |
| 35 | 2 FR | 2020-14 | 4 FR-South E  | 1 | 1 | #####    | #####    |
| 36 | 2 FR | 2020-14 | 4 FR-South E  | 1 | 2 | #####    | #####    |
| 37 | 2 FR | 2020-14 | 4 FR-South E  | 1 | 3 | 1.170309 | #####    |
| 38 | 2 FR | 2020-14 | 4 FR-South E  | 1 | 4 | #####    | #####    |
| 39 | 2 FR | 2020-14 | 4 FR-South E  | 1 | 5 | #####    | #####    |
| 40 | 2 FR | 2020-14 | 4 FR-South E  | 2 | 1 | #####    | #####    |
| 41 | 2 FR | 2020-14 | 4 FR-South E  | 2 | 2 | 1.102041 | #####    |
| 42 | 2 FR | 2020-14 | 4 FR-South E  | 2 | 3 | #####    | #####    |
| 43 | 2 FR | 2020-14 | 4 FR-South E  | 2 | 4 | 0.625    | #####    |
| 44 | 2 FR | 2020-14 | 4 FR-South E  | 2 | 5 | 0.75     | #####    |
| 45 | 2 FR | 2020-14 | 4 FR-South E  | 3 | 1 | #####    | #####    |
| 46 | 2 FR | 2020-14 | 4 FR-South E  | 3 | 2 | 0.25     | #####    |
| 47 | 2 FR | 2020-14 | 4 FR-South E  | 3 | 3 | 1.428571 | #####    |
| 48 | 2 FR | 2020-14 | 4 FR-South E  | 3 | 4 | 1.541667 | 1.054166 |
| 49 | 2 FR | 2020-14 | 4 FR-South E  | 3 | 5 | 0        | 0        |
| 50 | 2 FR | 2020-14 | 4 FR-South V  | 1 | 1 | #####    | #####    |
| 51 | 2 FR | 2020-14 | 4 FR-South V  | 1 | 2 | #####    | #####    |
| 52 | 2 FR | 2020-14 | 4 FR-South V  | 1 | 3 | 1.096128 | #####    |
| 53 | 2 FR | 2020-14 | 4 FR-South V  | 1 | 4 | #####    | #####    |
| 54 | 2 FR | 2020-14 | 4 FR-South V  | 1 | 5 | 0        | 0        |
| 55 | 2 FR | 2020-14 | 4 FR-South V  | 2 | 1 | #####    | #####    |
| 56 | 2 FR | 2020-14 | 4 FR-South V  | 2 | 2 | #####    | #####    |
| 57 | 2 FR | 2020-14 | 4 FR-South V  | 2 | 3 | 1.422018 | #####    |
| 58 | 2 FR | 2020-14 | 4 FR-South V  | 2 | 4 | 1        | #####    |
| 59 | 2 FR | 2020-14 | 4 FR-South V  | 2 | 5 | #####    | #####    |
| 60 | 2 FR | 2020-14 | 4 FR-South V  | 2 | 6 | #####    | #####    |

|    |      |         |               |   |   |          |       |  |
|----|------|---------|---------------|---|---|----------|-------|--|
| 1  |      |         |               |   |   |          |       |  |
| 2  |      |         |               |   |   |          |       |  |
| 3  | 2 FR | 2020-14 | 4 FR-South V  | 2 | 5 | 0        | 0     |  |
| 4  | 2 FR | 2020-14 | 4 FR-South V  | 3 | 1 | #####    | ##### |  |
| 5  | 2 FR | 2020-14 | 4 FR-South V  | 3 | 2 | 0        | 0     |  |
| 6  | 2 FR | 2020-14 | 4 FR-South V  | 3 | 3 | #####    | ##### |  |
| 7  | 2 FR | 2020-14 | 4 FR-South V  | 3 | 4 | #####    | ##### |  |
| 8  | 2 FR | 2020-14 | 4 FR-South V  | 3 | 5 | 0        | 0     |  |
| 9  | 2 FR | 2020-14 | 4 FR-West     | 1 | 1 | #####    | ##### |  |
| 10 | 2 FR | 2020-14 | 4 FR-West     | 1 | 2 | #####    | ##### |  |
| 11 | 2 FR | 2020-14 | 4 FR-West     | 1 | 3 | 2.040537 | ##### |  |
| 12 | 2 FR | 2020-14 | 4 FR-West     | 1 | 4 | #####    | ##### |  |
| 13 | 2 FR | 2020-14 | 4 FR-West     | 1 | 5 | #####    | ##### |  |
| 14 | 2 FR | 2020-14 | 4 FR-West     | 2 | 1 | 1.024413 | ##### |  |
| 15 | 2 FR | 2020-14 | 4 FR-West     | 2 | 2 | #####    | ##### |  |
| 16 | 2 FR | 2020-14 | 4 FR-West     | 2 | 3 | 2.337079 | ##### |  |
| 17 | 2 FR | 2020-14 | 4 FR-West     | 2 | 4 | #####    | ##### |  |
| 18 | 2 FR | 2020-14 | 4 FR-West     | 2 | 5 | #####    | ##### |  |
| 19 | 2 FR | 2020-14 | 4 FR-West     | 3 | 1 | #####    | ##### |  |
| 20 | 2 FR | 2020-14 | 4 FR-West     | 3 | 2 | #####    | ##### |  |
| 21 | 2 FR | 2020-14 | 4 FR-West     | 3 | 3 | 1.727273 | ##### |  |
| 22 | 2 FR | 2020-14 | 4 FR-West     | 3 | 4 | #####    | ##### |  |
| 23 | 2 FR | 2020-14 | 4 FR-West     | 3 | 5 | 0        | 0     |  |
| 24 | 2 FR | 2020-14 | 5 FR-Corse    | 1 | 1 | 0        | 0     |  |
| 25 | 2 FR | 2020-14 | 5 FR-Corse    | 1 | 3 | 0        | 0     |  |
| 26 | 2 FR | 2020-14 | 5 FR-Corse    | 1 | 4 | 0        | 0     |  |
| 27 | 2 FR | 2020-14 | 5 FR-Corse    | 1 | 5 | 0        | 0     |  |
| 28 | 2 FR | 2020-14 | 5 FR-Corse    | 2 | 1 | 0        | 0     |  |
| 29 | 2 FR | 2020-14 | 5 FR-Corse    | 2 | 3 | 0        | 0     |  |
| 30 | 2 FR | 2020-14 | 5 FR-Corse    | 2 | 4 | 0        | 0     |  |
| 31 | 2 FR | 2020-14 | 5 FR-Corse    | 2 | 5 | 0        | 0     |  |
| 32 | 2 FR | 2020-14 | 5 FR-Corse    | 3 | 1 | 0        | 0     |  |
| 33 | 2 FR | 2020-14 | 5 FR-Corse    | 3 | 3 | 0        | 0     |  |
| 34 | 2 FR | 2020-14 | 5 FR-Ile de F | 1 | 1 | #####    | ##### |  |
| 35 | 2 FR | 2020-14 | 5 FR-Ile de F | 1 | 2 | #####    | ##### |  |
| 36 | 2 FR | 2020-14 | 5 FR-Ile de F | 1 | 3 | #####    | ##### |  |
| 37 | 2 FR | 2020-14 | 5 FR-Ile de F | 1 | 4 | #####    | ##### |  |
| 38 | 2 FR | 2020-14 | 5 FR-Ile de F | 1 | 5 | 0.5      | ##### |  |
| 39 | 2 FR | 2020-14 | 5 FR-Ile de F | 2 | 1 | #####    | ##### |  |
| 40 | 2 FR | 2020-14 | 5 FR-Ile de F | 2 | 2 | 0.21875  | ##### |  |
| 41 | 2 FR | 2020-14 | 5 FR-Ile de F | 2 | 3 | #####    | ##### |  |
| 42 | 2 FR | 2020-14 | 5 FR-Ile de F | 2 | 4 | #####    | ##### |  |
| 43 | 2 FR | 2020-14 | 5 FR-Ile de F | 2 | 5 | 0.5      | ##### |  |
| 44 | 2 FR | 2020-14 | 5 FR-Ile de F | 3 | 1 | #####    | ##### |  |
| 45 | 2 FR | 2020-14 | 5 FR-Ile de F | 3 | 2 | 0.5      | ##### |  |
| 46 | 2 FR | 2020-14 | 5 FR-Ile de F | 3 | 3 | #####    | ##### |  |
| 47 | 2 FR | 2020-14 | 5 FR-Ile de F | 3 | 4 | 1.052632 | ##### |  |
| 48 | 2 FR | 2020-14 | 5 FR-Ile de F | 3 | 5 | 0.5      | ##### |  |
| 49 | 2 FR | 2020-14 | 5 FR-North E  | 1 | 1 | #####    | ##### |  |
| 50 | 2 FR | 2020-14 | 5 FR-North E  | 1 | 2 | #####    | ##### |  |
| 51 | 2 FR | 2020-14 | 5 FR-North E  | 1 | 3 | #####    | ##### |  |
| 52 | 2 FR | 2020-14 | 5 FR-North E  | 1 | 4 | #####    | ##### |  |
| 53 | 2 FR | 2020-14 | 5 FR-North E  | 1 | 5 | #####    | ##### |  |
| 54 | 2 FR | 2020-14 | 5 FR-North E  | 2 | 1 | #####    | ##### |  |
| 55 | 2 FR | 2020-14 | 5 FR-North E  | 2 | 2 | #####    | ##### |  |
| 56 | 2 FR | 2020-14 | 5 FR-North E  | 2 | 3 | #####    | ##### |  |
| 57 | 2 FR | 2020-14 | 5 FR-North E  | 2 | 4 | #####    | ##### |  |
| 58 | 2 FR | 2020-14 | 5 FR-North E  | 2 | 5 | #####    | ##### |  |
| 59 | 2 FR | 2020-14 | 5 FR-North E  | 2 | 5 | #####    | ##### |  |
| 60 | 2 FR | 2020-14 | 5 FR-North E  | 2 | 5 | #####    | ##### |  |

|    |      |         |              |   |   |       |       |
|----|------|---------|--------------|---|---|-------|-------|
| 1  |      |         |              |   |   |       |       |
| 2  |      |         |              |   |   |       |       |
| 3  | 2 FR | 2020-14 | 5 FR-North E | 3 | 1 | ##### | ##### |
| 4  | 2 FR | 2020-14 | 5 FR-North E | 3 | 2 | ##### | ##### |
| 5  | 2 FR | 2020-14 | 5 FR-North E | 3 | 3 | ##### | ##### |
| 6  | 2 FR | 2020-14 | 5 FR-North E | 3 | 4 | 0.6   | ##### |
| 7  | 2 FR | 2020-14 | 5 FR-North E | 3 | 5 | ##### | ##### |
| 8  | 2 FR | 2020-14 | 5 FR-Overall | 1 | 1 | ##### | ##### |
| 9  | 2 FR | 2020-14 | 5 FR-Overall | 1 | 2 | ##### | ##### |
| 10 | 2 FR | 2020-14 | 5 FR-Overall | 1 | 3 | ##### | ##### |
| 11 | 2 FR | 2020-14 | 5 FR-Overall | 1 | 4 | ##### | ##### |
| 12 | 2 FR | 2020-14 | 5 FR-Overall | 1 | 5 | ##### | ##### |
| 13 | 2 FR | 2020-14 | 5 FR-Overall | 2 | 1 | ##### | ##### |
| 14 | 2 FR | 2020-14 | 5 FR-Overall | 2 | 2 | ##### | ##### |
| 15 | 2 FR | 2020-14 | 5 FR-Overall | 2 | 3 | ##### | ##### |
| 16 | 2 FR | 2020-14 | 5 FR-Overall | 2 | 4 | ##### | ##### |
| 17 | 2 FR | 2020-14 | 5 FR-Overall | 2 | 5 | ##### | ##### |
| 18 | 2 FR | 2020-14 | 5 FR-Overall | 2 | 5 | ##### | ##### |
| 19 | 2 FR | 2020-14 | 5 FR-Overall | 3 | 1 | ##### | ##### |
| 20 | 2 FR | 2020-14 | 5 FR-Overall | 3 | 2 | ##### | ##### |
| 21 | 2 FR | 2020-14 | 5 FR-Overall | 3 | 3 | ##### | ##### |
| 22 | 2 FR | 2020-14 | 5 FR-Overall | 3 | 4 | ##### | ##### |
| 23 | 2 FR | 2020-14 | 5 FR-Overall | 3 | 5 | ##### | ##### |
| 24 | 2 FR | 2020-14 | 5 FR-South E | 1 | 1 | ##### | ##### |
| 25 | 2 FR | 2020-14 | 5 FR-South E | 1 | 2 | ##### | ##### |
| 26 | 2 FR | 2020-14 | 5 FR-South E | 1 | 3 | ##### | ##### |
| 27 | 2 FR | 2020-14 | 5 FR-South E | 1 | 4 | ##### | ##### |
| 28 | 2 FR | 2020-14 | 5 FR-South E | 1 | 5 | ##### | ##### |
| 29 | 2 FR | 2020-14 | 5 FR-South E | 2 | 1 | ##### | ##### |
| 30 | 2 FR | 2020-14 | 5 FR-South E | 2 | 2 | ##### | ##### |
| 31 | 2 FR | 2020-14 | 5 FR-South E | 2 | 3 | ##### | ##### |
| 32 | 2 FR | 2020-14 | 5 FR-South E | 2 | 4 | ##### | ##### |
| 33 | 2 FR | 2020-14 | 5 FR-South E | 2 | 5 | ##### | ##### |
| 34 | 2 FR | 2020-14 | 5 FR-South E | 3 | 1 | ##### | ##### |
| 35 | 2 FR | 2020-14 | 5 FR-South E | 3 | 2 | ##### | ##### |
| 36 | 2 FR | 2020-14 | 5 FR-South E | 3 | 3 | ##### | ##### |
| 37 | 2 FR | 2020-14 | 5 FR-South E | 3 | 4 | 0.64  | ##### |
| 38 | 2 FR | 2020-14 | 5 FR-South E | 3 | 5 | 0.5   | ##### |
| 39 | 2 FR | 2020-14 | 5 FR-South V | 1 | 1 | ##### | ##### |
| 40 | 2 FR | 2020-14 | 5 FR-South V | 1 | 2 | ##### | ##### |
| 41 | 2 FR | 2020-14 | 5 FR-South V | 1 | 3 | ##### | ##### |
| 42 | 2 FR | 2020-14 | 5 FR-South V | 1 | 4 | ##### | ##### |
| 43 | 2 FR | 2020-14 | 5 FR-South V | 1 | 5 | ##### | ##### |
| 44 | 2 FR | 2020-14 | 5 FR-South V | 2 | 1 | ##### | ##### |
| 45 | 2 FR | 2020-14 | 5 FR-South V | 2 | 2 | ##### | ##### |
| 46 | 2 FR | 2020-14 | 5 FR-South V | 2 | 3 | ##### | ##### |
| 47 | 2 FR | 2020-14 | 5 FR-South V | 2 | 4 | ##### | ##### |
| 48 | 2 FR | 2020-14 | 5 FR-South V | 2 | 5 | 0.5   | ##### |
| 49 | 2 FR | 2020-14 | 5 FR-South V | 3 | 1 | ##### | ##### |
| 50 | 2 FR | 2020-14 | 5 FR-South V | 3 | 2 | ##### | ##### |
| 51 | 2 FR | 2020-14 | 5 FR-South V | 3 | 3 | ##### | ##### |
| 52 | 2 FR | 2020-14 | 5 FR-South V | 3 | 4 | ##### | ##### |
| 53 | 2 FR | 2020-14 | 5 FR-South V | 3 | 5 | ##### | ##### |
| 54 | 2 FR | 2020-14 | 5 FR-West    | 1 | 1 | ##### | ##### |
| 55 | 2 FR | 2020-14 | 5 FR-West    | 1 | 2 | ##### | ##### |
| 56 | 2 FR | 2020-14 | 5 FR-West    | 1 | 3 | ##### | ##### |
| 57 | 2 FR | 2020-14 | 5 FR-West    | 1 | 4 | ##### | ##### |
| 58 | 2 FR | 2020-14 | 5 FR-West    | 1 | 5 | ##### | ##### |
| 59 | 2 FR | 2020-14 | 5 FR-West    | 1 | 5 | ##### | ##### |
| 60 | 2 FR | 2020-14 | 5 FR-West    | 2 | 1 | ##### | ##### |

|    |      |         |               |   |   |          |          |  |
|----|------|---------|---------------|---|---|----------|----------|--|
| 1  |      |         |               |   |   |          |          |  |
| 2  |      |         |               |   |   |          |          |  |
| 3  | 2 FR | 2020-14 | 5 FR-West     | 2 | 2 | 0.71875  | #####    |  |
| 4  | 2 FR | 2020-14 | 5 FR-West     | 2 | 3 | #####    | #####    |  |
| 5  | 2 FR | 2020-14 | 5 FR-West     | 2 | 4 | #####    | #####    |  |
| 6  | 2 FR | 2020-14 | 5 FR-West     | 2 | 5 | #####    | #####    |  |
| 7  | 2 FR | 2020-14 | 5 FR-West     | 3 | 1 | #####    | #####    |  |
| 8  | 2 FR | 2020-14 | 5 FR-West     | 3 | 2 | #####    | #####    |  |
| 9  | 2 FR | 2020-14 | 5 FR-West     | 3 | 3 | 1.15625  | #####    |  |
| 10 | 2 FR | 2020-14 | 5 FR-West     | 3 | 4 | #####    | #####    |  |
| 11 | 2 FR | 2020-14 | 5 FR-West     | 3 | 5 | #####    | #####    |  |
| 12 | 2 FR | 2020-15 | 1 FR-Corse    | 1 | 1 | #####    | #####    |  |
| 13 | 2 FR | 2020-15 | 1 FR-Corse    | 1 | 3 | 0        | 0        |  |
| 14 | 2 FR | 2020-15 | 1 FR-Corse    | 1 | 4 | 1.292102 | #####    |  |
| 15 | 2 FR | 2020-15 | 1 FR-Corse    | 1 | 5 | #####    | #####    |  |
| 16 | 2 FR | 2020-15 | 1 FR-Corse    | 2 | 1 | #####    | #####    |  |
| 17 | 2 FR | 2020-15 | 1 FR-Corse    | 2 | 3 | 0        | 0        |  |
| 18 | 2 FR | 2020-15 | 1 FR-Corse    | 2 | 4 | 1        | 0        |  |
| 19 | 2 FR | 2020-15 | 1 FR-Corse    | 2 | 5 | 0        | 0        |  |
| 20 | 2 FR | 2020-15 | 1 FR-Corse    | 3 | 1 | #####    | #####    |  |
| 21 | 2 FR | 2020-15 | 1 FR-Corse    | 3 | 4 | 1.5      | #####    |  |
| 22 | 2 FR | 2020-15 | 1 FR-Corse    | 3 | 5 | #####    | #####    |  |
| 23 | 2 FR | 2020-15 | 1 FR-Ile de F | 1 | 1 | 2.34125  | #####    |  |
| 24 | 2 FR | 2020-15 | 1 FR-Ile de F | 1 | 2 | 2.589473 | #####    |  |
| 25 | 2 FR | 2020-15 | 1 FR-Ile de F | 1 | 3 | 2.6318   | #####    |  |
| 26 | 2 FR | 2020-15 | 1 FR-Ile de F | 1 | 4 | 2.435156 | #####    |  |
| 27 | 2 FR | 2020-15 | 1 FR-Ile de F | 1 | 5 | 1.198157 | #####    |  |
| 28 | 2 FR | 2020-15 | 1 FR-Ile de F | 2 | 1 | 2.151285 | #####    |  |
| 29 | 2 FR | 2020-15 | 1 FR-Ile de F | 2 | 2 | 2.5      | #####    |  |
| 30 | 2 FR | 2020-15 | 1 FR-Ile de F | 2 | 3 | 2.28     | #####    |  |
| 31 | 2 FR | 2020-15 | 1 FR-Ile de F | 2 | 4 | 2.742857 | #####    |  |
| 32 | 2 FR | 2020-15 | 1 FR-Ile de F | 2 | 5 | #####    | #####    |  |
| 33 | 2 FR | 2020-15 | 1 FR-Ile de F | 3 | 1 | 2.561596 | #####    |  |
| 34 | 2 FR | 2020-15 | 1 FR-Ile de F | 3 | 2 | 2.7      | 1.249528 |  |
| 35 | 2 FR | 2020-15 | 1 FR-Ile de F | 3 | 3 | 2.923077 | 1.068546 |  |
| 36 | 2 FR | 2020-15 | 1 FR-Ile de F | 3 | 4 | 2.066667 | #####    |  |
| 37 | 2 FR | 2020-15 | 1 FR-Ile de F | 3 | 5 | 2.125    | #####    |  |
| 38 | 2 FR | 2020-15 | 1 FR-North E  | 1 | 1 | 2.33386  | #####    |  |
| 39 | 2 FR | 2020-15 | 1 FR-North E  | 1 | 2 | 2.368482 | #####    |  |
| 40 | 2 FR | 2020-15 | 1 FR-North E  | 1 | 3 | 2.791528 | #####    |  |
| 41 | 2 FR | 2020-15 | 1 FR-North E  | 1 | 4 | 2.424395 | #####    |  |
| 42 | 2 FR | 2020-15 | 1 FR-North E  | 1 | 5 | 1.581077 | #####    |  |
| 43 | 2 FR | 2020-15 | 1 FR-North E  | 2 | 1 | 2.388624 | #####    |  |
| 44 | 2 FR | 2020-15 | 1 FR-North E  | 2 | 2 | 1.891892 | #####    |  |
| 45 | 2 FR | 2020-15 | 1 FR-North E  | 2 | 3 | 3.152941 | #####    |  |
| 46 | 2 FR | 2020-15 | 1 FR-North E  | 2 | 4 | 2.551724 | #####    |  |
| 47 | 2 FR | 2020-15 | 1 FR-North E  | 2 | 5 | 1.535714 | #####    |  |
| 48 | 2 FR | 2020-15 | 1 FR-North E  | 3 | 1 | 2.265116 | #####    |  |
| 49 | 2 FR | 2020-15 | 1 FR-North E  | 3 | 2 | 2.777778 | #####    |  |
| 50 | 2 FR | 2020-15 | 1 FR-North E  | 3 | 3 | 2.37037  | #####    |  |
| 51 | 2 FR | 2020-15 | 1 FR-North E  | 3 | 4 | 2.222222 | #####    |  |
| 52 | 2 FR | 2020-15 | 1 FR-North E  | 3 | 5 | 1.647059 | #####    |  |
| 53 | 2 FR | 2020-15 | 1 FR-Overall  | 1 | 1 | 2.625479 | #####    |  |
| 54 | 2 FR | 2020-15 | 1 FR-Overall  | 1 | 2 | 2.754282 | #####    |  |
| 55 | 2 FR | 2020-15 | 1 FR-Overall  | 1 | 3 | 3.047693 | #####    |  |
| 56 | 2 FR | 2020-15 | 1 FR-Overall  | 1 | 4 | 2.952916 | #####    |  |
| 57 | 2 FR | 2020-15 | 1 FR-Overall  | 1 | 5 | 1.414658 | #####    |  |
| 58 | 2 FR | 2020-15 | 1 FR-Overall  | 2 | 1 | 2.576484 | #####    |  |
| 59 |      |         |               |   |   |          |          |  |
| 60 |      |         |               |   |   |          |          |  |

|    |      |         |              |   |   |          |          |  |
|----|------|---------|--------------|---|---|----------|----------|--|
| 1  |      |         |              |   |   |          |          |  |
| 2  |      |         |              |   |   |          |          |  |
| 3  | 2 FR | 2020-15 | 1 FR-Overall | 2 | 2 | 2.88078  | #####    |  |
| 4  | 2 FR | 2020-15 | 1 FR-Overall | 2 | 3 | 3.248163 | #####    |  |
| 5  | 2 FR | 2020-15 | 1 FR-Overall | 2 | 4 | 2.808646 | #####    |  |
| 6  | 2 FR | 2020-15 | 1 FR-Overall | 2 | 5 | 1.248437 | #####    |  |
| 7  | 2 FR | 2020-15 | 1 FR-Overall | 3 | 1 | 2.680582 | #####    |  |
| 8  | 2 FR | 2020-15 | 1 FR-Overall | 3 | 2 | 2.640117 | #####    |  |
| 9  | 2 FR | 2020-15 | 1 FR-Overall | 3 | 3 | 2.84511  | #####    |  |
| 10 | 2 FR | 2020-15 | 1 FR-Overall | 3 | 4 | 3.118401 | #####    |  |
| 11 | 2 FR | 2020-15 | 1 FR-Overall | 3 | 5 | 1.679229 | #####    |  |
| 12 | 2 FR | 2020-15 | 1 FR-South E | 1 | 1 | 3.052578 | #####    |  |
| 13 | 2 FR | 2020-15 | 1 FR-South E | 1 | 2 | 3.142368 | #####    |  |
| 14 | 2 FR | 2020-15 | 1 FR-South E | 1 | 3 | 3.606304 | #####    |  |
| 15 | 2 FR | 2020-15 | 1 FR-South E | 1 | 4 | 3.703995 | #####    |  |
| 16 | 2 FR | 2020-15 | 1 FR-South E | 1 | 5 | 1.288079 | #####    |  |
| 17 | 2 FR | 2020-15 | 1 FR-South E | 2 | 1 | 2.94949  | #####    |  |
| 18 | 2 FR | 2020-15 | 1 FR-South E | 2 | 2 | 4        | #####    |  |
| 19 | 2 FR | 2020-15 | 1 FR-South E | 2 | 3 | 3.388889 | #####    |  |
| 20 | 2 FR | 2020-15 | 1 FR-South E | 2 | 4 | 3.470588 | #####    |  |
| 21 | 2 FR | 2020-15 | 1 FR-South E | 2 | 5 | 1.166667 | #####    |  |
| 22 | 2 FR | 2020-15 | 1 FR-South E | 3 | 1 | 3.162709 | #####    |  |
| 23 | 2 FR | 2020-15 | 1 FR-South E | 3 | 2 | 2.529412 | #####    |  |
| 24 | 2 FR | 2020-15 | 1 FR-South E | 3 | 3 | 3.826087 | 1.030187 |  |
| 25 | 2 FR | 2020-15 | 1 FR-South E | 3 | 4 | 3.96875  | #####    |  |
| 26 | 2 FR | 2020-15 | 1 FR-South E | 3 | 5 | 1.466667 | #####    |  |
| 27 | 2 FR | 2020-15 | 1 FR-South V | 1 | 1 | 2.608047 | #####    |  |
| 28 | 2 FR | 2020-15 | 1 FR-South V | 1 | 2 | 2.56653  | #####    |  |
| 29 | 2 FR | 2020-15 | 1 FR-South V | 1 | 3 | 2.891438 | #####    |  |
| 30 | 2 FR | 2020-15 | 1 FR-South V | 1 | 4 | 3.304621 | #####    |  |
| 31 | 2 FR | 2020-15 | 1 FR-South V | 1 | 5 | 1.156402 | #####    |  |
| 32 | 2 FR | 2020-15 | 1 FR-South V | 2 | 1 | 2.634311 | #####    |  |
| 33 | 2 FR | 2020-15 | 1 FR-South V | 2 | 2 | 2.897436 | #####    |  |
| 34 | 2 FR | 2020-15 | 1 FR-South V | 2 | 3 | 3.393443 | #####    |  |
| 35 | 2 FR | 2020-15 | 1 FR-South V | 2 | 4 | 2.960784 | #####    |  |
| 36 | 2 FR | 2020-15 | 1 FR-South V | 2 | 5 | 0.96     | #####    |  |
| 37 | 2 FR | 2020-15 | 1 FR-South V | 3 | 1 | 2.583097 | #####    |  |
| 38 | 2 FR | 2020-15 | 1 FR-South V | 3 | 2 | 2.3125   | #####    |  |
| 39 | 2 FR | 2020-15 | 1 FR-South V | 3 | 3 | 2.333333 | #####    |  |
| 40 | 2 FR | 2020-15 | 1 FR-South V | 3 | 4 | 3.580645 | #####    |  |
| 41 | 2 FR | 2020-15 | 1 FR-South V | 3 | 5 | 1.4      | #####    |  |
| 42 | 2 FR | 2020-15 | 1 FR-West    | 1 | 1 | 2.854755 | #####    |  |
| 43 | 2 FR | 2020-15 | 1 FR-West    | 1 | 2 | 3.245482 | #####    |  |
| 44 | 2 FR | 2020-15 | 1 FR-West    | 1 | 3 | 3.378932 | #####    |  |
| 45 | 2 FR | 2020-15 | 1 FR-West    | 1 | 4 | 2.738406 | #####    |  |
| 46 | 2 FR | 2020-15 | 1 FR-West    | 1 | 5 | 1.825246 | #####    |  |
| 47 | 2 FR | 2020-15 | 1 FR-West    | 2 | 1 | 2.805003 | #####    |  |
| 48 | 2 FR | 2020-15 | 1 FR-West    | 2 | 2 | 3.489362 | #####    |  |
| 49 | 2 FR | 2020-15 | 1 FR-West    | 2 | 3 | 4.016393 | #####    |  |
| 50 | 2 FR | 2020-15 | 1 FR-West    | 2 | 4 | 2.390625 | #####    |  |
| 51 | 2 FR | 2020-15 | 1 FR-West    | 2 | 5 | 1.5625   | #####    |  |
| 52 | 2 FR | 2020-15 | 1 FR-West    | 3 | 1 | 2.915086 | #####    |  |
| 53 | 2 FR | 2020-15 | 1 FR-West    | 3 | 2 | 3        | 1.264105 |  |
| 54 | 2 FR | 2020-15 | 1 FR-West    | 3 | 3 | 2.814815 | #####    |  |
| 55 | 2 FR | 2020-15 | 1 FR-West    | 3 | 4 | 3.16     | 1.025667 |  |
| 56 | 2 FR | 2020-15 | 1 FR-West    | 3 | 5 | 2.5      | #####    |  |
| 57 | 2 FR | 2020-15 | 2 FR-Corse   | 1 | 1 | #####    | #####    |  |
| 58 | 2 FR | 2020-15 | 2 FR-Corse   | 1 | 3 | 0        | 0        |  |
| 59 | 2 FR | 2020-15 | 2 FR-Corse   | 1 | 3 | 0        | 0        |  |
| 60 | 2 FR | 2020-15 | 2 FR-Corse   | 1 | 3 | 0        | 0        |  |

|    |      |         |               |   |   |          |       |  |
|----|------|---------|---------------|---|---|----------|-------|--|
| 1  |      |         |               |   |   |          |       |  |
| 2  |      |         |               |   |   |          |       |  |
| 3  | 2 FR | 2020-15 | 2 FR-Corse    | 1 | 4 | #####    | ##### |  |
| 4  | 2 FR | 2020-15 | 2 FR-Corse    | 1 | 5 | #####    | ##### |  |
| 5  | 2 FR | 2020-15 | 2 FR-Corse    | 2 | 1 | #####    | ##### |  |
| 6  | 2 FR | 2020-15 | 2 FR-Corse    | 2 | 3 | 0        | 0     |  |
| 7  | 2 FR | 2020-15 | 2 FR-Corse    | 2 | 4 | 1        | 0     |  |
| 8  | 2 FR | 2020-15 | 2 FR-Corse    | 2 | 5 | 0        | 0     |  |
| 9  | 2 FR | 2020-15 | 2 FR-Corse    | 3 | 1 | #####    | ##### |  |
| 10 | 2 FR | 2020-15 | 2 FR-Corse    | 3 | 4 | 0        | 0     |  |
| 11 | 2 FR | 2020-15 | 2 FR-Corse    | 3 | 5 | #####    | ##### |  |
| 12 | 2 FR | 2020-15 | 2 FR-Ile de F | 1 | 1 | 1.397431 | ##### |  |
| 13 | 2 FR | 2020-15 | 2 FR-Ile de F | 1 | 2 | 1.646334 | ##### |  |
| 14 | 2 FR | 2020-15 | 2 FR-Ile de F | 1 | 3 | 1.626862 | ##### |  |
| 15 | 2 FR | 2020-15 | 2 FR-Ile de F | 1 | 4 | 1.135411 | ##### |  |
| 16 | 2 FR | 2020-15 | 2 FR-Ile de F | 1 | 5 | #####    | ##### |  |
| 17 | 2 FR | 2020-15 | 2 FR-Ile de F | 2 | 1 | 1.438034 | ##### |  |
| 18 | 2 FR | 2020-15 | 2 FR-Ile de F | 2 | 2 | 1.682927 | ##### |  |
| 19 | 2 FR | 2020-15 | 2 FR-Ile de F | 2 | 3 | 1.857143 | ##### |  |
| 20 | 2 FR | 2020-15 | 2 FR-Ile de F | 2 | 4 | 1.342105 | ##### |  |
| 21 | 2 FR | 2020-15 | 2 FR-Ile de F | 2 | 5 | 0.625    | ##### |  |
| 22 | 2 FR | 2020-15 | 2 FR-Ile de F | 3 | 1 | 1.351048 | ##### |  |
| 23 | 2 FR | 2020-15 | 2 FR-Ile de F | 3 | 2 | 1.6      | ##### |  |
| 24 | 2 FR | 2020-15 | 2 FR-Ile de F | 3 | 3 | 1.428571 | ##### |  |
| 25 | 2 FR | 2020-15 | 2 FR-Ile de F | 3 | 4 | #####    | ##### |  |
| 26 | 2 FR | 2020-15 | 2 FR-Ile de F | 3 | 5 | 1.5      | ##### |  |
| 27 | 2 FR | 2020-15 | 2 FR-North E  | 1 | 1 | 1.447365 | ##### |  |
| 28 | 2 FR | 2020-15 | 2 FR-North E  | 1 | 2 | 1.577266 | ##### |  |
| 29 | 2 FR | 2020-15 | 2 FR-North E  | 1 | 3 | 1.666609 | ##### |  |
| 30 | 2 FR | 2020-15 | 2 FR-North E  | 1 | 4 | 1.559967 | ##### |  |
| 31 | 2 FR | 2020-15 | 2 FR-North E  | 1 | 5 | #####    | ##### |  |
| 32 | 2 FR | 2020-15 | 2 FR-North E  | 2 | 1 | 1.434712 | ##### |  |
| 33 | 2 FR | 2020-15 | 2 FR-North E  | 2 | 2 | 1.428571 | ##### |  |
| 34 | 2 FR | 2020-15 | 2 FR-North E  | 2 | 3 | 1.854167 | ##### |  |
| 35 | 2 FR | 2020-15 | 2 FR-North E  | 2 | 4 | 1.522388 | ##### |  |
| 36 | 2 FR | 2020-15 | 2 FR-North E  | 2 | 5 | #####    | ##### |  |
| 37 | 2 FR | 2020-15 | 2 FR-North E  | 3 | 1 | 1.463621 | ##### |  |
| 38 | 2 FR | 2020-15 | 2 FR-North E  | 3 | 2 | 1.722222 | ##### |  |
| 39 | 2 FR | 2020-15 | 2 FR-North E  | 3 | 3 | 1.451613 | ##### |  |
| 40 | 2 FR | 2020-15 | 2 FR-North E  | 3 | 4 | 1.619048 | ##### |  |
| 41 | 2 FR | 2020-15 | 2 FR-North E  | 3 | 5 | 1.058824 | ##### |  |
| 42 | 2 FR | 2020-15 | 2 FR-Overall  | 1 | 1 | 1.38798  | ##### |  |
| 43 | 2 FR | 2020-15 | 2 FR-Overall  | 1 | 2 | 1.585391 | ##### |  |
| 44 | 2 FR | 2020-15 | 2 FR-Overall  | 1 | 3 | 1.607005 | ##### |  |
| 45 | 2 FR | 2020-15 | 2 FR-Overall  | 1 | 4 | 1.34888  | ##### |  |
| 46 | 2 FR | 2020-15 | 2 FR-Overall  | 1 | 5 | #####    | ##### |  |
| 47 | 2 FR | 2020-15 | 2 FR-Overall  | 2 | 1 | 1.409362 | ##### |  |
| 48 | 2 FR | 2020-15 | 2 FR-Overall  | 2 | 2 | 1.571709 | ##### |  |
| 49 | 2 FR | 2020-15 | 2 FR-Overall  | 2 | 3 | 1.888921 | ##### |  |
| 50 | 2 FR | 2020-15 | 2 FR-Overall  | 2 | 4 | 1.327219 | ##### |  |
| 51 | 2 FR | 2020-15 | 2 FR-Overall  | 2 | 5 | #####    | ##### |  |
| 52 | 2 FR | 2020-15 | 2 FR-Overall  | 3 | 1 | 1.363803 | ##### |  |
| 53 | 2 FR | 2020-15 | 2 FR-Overall  | 3 | 2 | 1.598767 | ##### |  |
| 54 | 2 FR | 2020-15 | 2 FR-Overall  | 3 | 3 | 1.323711 | ##### |  |
| 55 | 2 FR | 2020-15 | 2 FR-Overall  | 3 | 4 | 1.374293 | ##### |  |
| 56 | 2 FR | 2020-15 | 2 FR-Overall  | 3 | 5 | 1.146258 | ##### |  |
| 57 | 2 FR | 2020-15 | 2 FR-South E  | 1 | 1 | 1.444836 | ##### |  |
| 58 | 2 FR | 2020-15 | 2 FR-South E  | 1 | 2 | 1.786925 | ##### |  |
| 59 | 2 FR | 2020-15 | 2 FR-South E  | 1 |   |          |       |  |
| 60 | 2 FR | 2020-15 | 2 FR-South E  | 1 |   |          |       |  |



|    |      |         |               |   |   |          |       |  |
|----|------|---------|---------------|---|---|----------|-------|--|
| 1  |      |         |               |   |   |          |       |  |
| 2  |      |         |               |   |   |          |       |  |
| 3  | 2 FR | 2020-15 | 2 FR-South E  | 1 | 3 | 1.629976 | ##### |  |
| 4  | 2 FR | 2020-15 | 2 FR-South E  | 1 | 4 | 1.438249 | ##### |  |
| 5  | 2 FR | 2020-15 | 2 FR-South E  | 1 | 5 | #####    | ##### |  |
| 6  | 2 FR | 2020-15 | 2 FR-South E  | 2 | 1 | 1.479715 | ##### |  |
| 7  | 2 FR | 2020-15 | 2 FR-South E  | 2 | 2 | 1.925    | ##### |  |
| 8  | 2 FR | 2020-15 | 2 FR-South E  | 2 | 3 | 1.965517 | ##### |  |
| 9  | 2 FR | 2020-15 | 2 FR-South E  | 2 | 4 | 1.4125   | ##### |  |
| 10 | 2 FR | 2020-15 | 2 FR-South E  | 2 | 5 | #####    | ##### |  |
| 11 | 2 FR | 2020-15 | 2 FR-South E  | 3 | 1 | 1.4067   | ##### |  |
| 12 | 2 FR | 2020-15 | 2 FR-South E  | 3 | 2 | 1.666667 | ##### |  |
| 13 | 2 FR | 2020-15 | 2 FR-South E  | 3 | 3 | 1.307692 | ##### |  |
| 14 | 2 FR | 2020-15 | 2 FR-South E  | 3 | 4 | 1.470588 | ##### |  |
| 15 | 2 FR | 2020-15 | 2 FR-South E  | 3 | 5 | 1.176471 | ##### |  |
| 16 | 2 FR | 2020-15 | 2 FR-South V  | 1 | 1 | 1.339946 | ##### |  |
| 17 | 2 FR | 2020-15 | 2 FR-South V  | 1 | 2 | 1.321864 | ##### |  |
| 18 | 2 FR | 2020-15 | 2 FR-South V  | 1 | 3 | 1.750327 | ##### |  |
| 19 | 2 FR | 2020-15 | 2 FR-South V  | 1 | 4 | 1.329762 | ##### |  |
| 20 | 2 FR | 2020-15 | 2 FR-South V  | 1 | 5 | #####    | ##### |  |
| 21 | 2 FR | 2020-15 | 2 FR-South V  | 2 | 1 | 1.421701 | ##### |  |
| 22 | 2 FR | 2020-15 | 2 FR-South V  | 2 | 2 | 1.175    | ##### |  |
| 23 | 2 FR | 2020-15 | 2 FR-South V  | 2 | 3 | 2.072464 | ##### |  |
| 24 | 2 FR | 2020-15 | 2 FR-South V  | 2 | 4 | 1.42623  | ##### |  |
| 25 | 2 FR | 2020-15 | 2 FR-South V  | 2 | 5 | #####    | ##### |  |
| 26 | 2 FR | 2020-15 | 2 FR-South V  | 3 | 1 | 1.259152 | ##### |  |
| 27 | 2 FR | 2020-15 | 2 FR-South V  | 3 | 2 | 1.4375   | ##### |  |
| 28 | 2 FR | 2020-15 | 2 FR-South V  | 3 | 3 | 1.363636 | ##### |  |
| 29 | 2 FR | 2020-15 | 2 FR-South V  | 3 | 4 | 1.25     | ##### |  |
| 30 | 2 FR | 2020-15 | 2 FR-South V  | 3 | 5 | #####    | ##### |  |
| 31 | 2 FR | 2020-15 | 2 FR-South V  | 3 | 1 | 1.343964 | ##### |  |
| 32 | 2 FR | 2020-15 | 2 FR-West     | 1 | 2 | 1.588026 | ##### |  |
| 33 | 2 FR | 2020-15 | 2 FR-West     | 1 | 3 | 1.424348 | ##### |  |
| 34 | 2 FR | 2020-15 | 2 FR-West     | 1 | 4 | 1.244989 | ##### |  |
| 35 | 2 FR | 2020-15 | 2 FR-West     | 1 | 5 | 1.153777 | ##### |  |
| 36 | 2 FR | 2020-15 | 2 FR-West     | 1 | 1 | 1.311934 | ##### |  |
| 37 | 2 FR | 2020-15 | 2 FR-West     | 2 | 2 | 1.603774 | ##### |  |
| 38 | 2 FR | 2020-15 | 2 FR-West     | 2 | 3 | 1.8125   | ##### |  |
| 39 | 2 FR | 2020-15 | 2 FR-West     | 2 | 4 | #####    | ##### |  |
| 40 | 2 FR | 2020-15 | 2 FR-West     | 2 | 5 | 1.030303 | ##### |  |
| 41 | 2 FR | 2020-15 | 2 FR-West     | 3 | 1 | 1.380911 | ##### |  |
| 42 | 2 FR | 2020-15 | 2 FR-West     | 3 | 2 | 1.571429 | ##### |  |
| 43 | 2 FR | 2020-15 | 2 FR-West     | 3 | 3 | 1.1      | ##### |  |
| 44 | 2 FR | 2020-15 | 2 FR-West     | 3 | 4 | 1.607143 | ##### |  |
| 45 | 2 FR | 2020-15 | 2 FR-West     | 3 | 5 | 1.444444 | ##### |  |
| 46 | 2 FR | 2020-15 | 3 FR-Corse    | 1 | 1 | 0        | 0     |  |
| 47 | 2 FR | 2020-15 | 3 FR-Corse    | 1 | 3 | 0        | 0     |  |
| 48 | 2 FR | 2020-15 | 3 FR-Corse    | 1 | 4 | 0        | 0     |  |
| 49 | 2 FR | 2020-15 | 3 FR-Corse    | 1 | 5 | 0        | 0     |  |
| 50 | 2 FR | 2020-15 | 3 FR-Corse    | 2 | 1 | 0        | 0     |  |
| 51 | 2 FR | 2020-15 | 3 FR-Corse    | 2 | 3 | 0        | 0     |  |
| 52 | 2 FR | 2020-15 | 3 FR-Corse    | 2 | 4 | 0        | 0     |  |
| 53 | 2 FR | 2020-15 | 3 FR-Corse    | 2 | 5 | 0        | 0     |  |
| 54 | 2 FR | 2020-15 | 3 FR-Corse    | 3 | 1 | 0        | 0     |  |
| 55 | 2 FR | 2020-15 | 3 FR-Corse    | 3 | 4 | 0        | 0     |  |
| 56 | 2 FR | 2020-15 | 3 FR-Corse    | 3 | 5 | 0        | 0     |  |
| 57 | 2 FR | 2020-15 | 3 FR-Corse    | 3 | 1 | 0        | 0     |  |
| 58 | 2 FR | 2020-15 | 3 FR-Ile de F | 1 | 1 | 0        | 0     |  |
| 59 | 2 FR | 2020-15 | 3 FR-Ile de F | 1 | 2 | 0        | 0     |  |
| 60 | 2 FR | 2020-15 | 3 FR-Ile de F | 1 | 2 | 0        | 0     |  |

|    |      |         |               |   |   |   |   |
|----|------|---------|---------------|---|---|---|---|
| 1  |      |         |               |   |   |   |   |
| 2  |      |         |               |   |   |   |   |
| 3  | 2 FR | 2020-15 | 3 FR-Ile de F | 1 | 3 | 0 | 0 |
| 4  | 2 FR | 2020-15 | 3 FR-Ile de F | 1 | 4 | 0 | 0 |
| 5  | 2 FR | 2020-15 | 3 FR-Ile de F | 1 | 5 | 0 | 0 |
| 6  | 2 FR | 2020-15 | 3 FR-Ile de F | 2 | 1 | 0 | 0 |
| 7  | 2 FR | 2020-15 | 3 FR-Ile de F | 2 | 2 | 0 | 0 |
| 8  | 2 FR | 2020-15 | 3 FR-Ile de F | 2 | 3 | 0 | 0 |
| 9  | 2 FR | 2020-15 | 3 FR-Ile de F | 2 | 4 | 0 | 0 |
| 10 | 2 FR | 2020-15 | 3 FR-Ile de F | 2 | 5 | 0 | 0 |
| 11 | 2 FR | 2020-15 | 3 FR-Ile de F | 3 | 1 | 0 | 0 |
| 12 | 2 FR | 2020-15 | 3 FR-Ile de F | 3 | 2 | 0 | 0 |
| 13 | 2 FR | 2020-15 | 3 FR-Ile de F | 3 | 3 | 0 | 0 |
| 14 | 2 FR | 2020-15 | 3 FR-Ile de F | 3 | 4 | 0 | 0 |
| 15 | 2 FR | 2020-15 | 3 FR-Ile de F | 3 | 5 | 0 | 0 |
| 16 | 2 FR | 2020-15 | 3 FR-North E  | 1 | 1 | 0 | 0 |
| 17 | 2 FR | 2020-15 | 3 FR-North E  | 1 | 2 | 0 | 0 |
| 18 | 2 FR | 2020-15 | 3 FR-North E  | 1 | 3 | 0 | 0 |
| 19 | 2 FR | 2020-15 | 3 FR-North E  | 1 | 4 | 0 | 0 |
| 20 | 2 FR | 2020-15 | 3 FR-North E  | 1 | 5 | 0 | 0 |
| 21 | 2 FR | 2020-15 | 3 FR-North E  | 2 | 1 | 0 | 0 |
| 22 | 2 FR | 2020-15 | 3 FR-North E  | 2 | 2 | 0 | 0 |
| 23 | 2 FR | 2020-15 | 3 FR-North E  | 2 | 3 | 0 | 0 |
| 24 | 2 FR | 2020-15 | 3 FR-North E  | 2 | 4 | 0 | 0 |
| 25 | 2 FR | 2020-15 | 3 FR-North E  | 2 | 5 | 0 | 0 |
| 26 | 2 FR | 2020-15 | 3 FR-North E  | 3 | 1 | 0 | 0 |
| 27 | 2 FR | 2020-15 | 3 FR-North E  | 3 | 2 | 0 | 0 |
| 28 | 2 FR | 2020-15 | 3 FR-North E  | 3 | 3 | 0 | 0 |
| 29 | 2 FR | 2020-15 | 3 FR-North E  | 3 | 4 | 0 | 0 |
| 30 | 2 FR | 2020-15 | 3 FR-North E  | 3 | 5 | 0 | 0 |
| 31 | 2 FR | 2020-15 | 3 FR-North E  | 3 | 5 | 0 | 0 |
| 32 | 2 FR | 2020-15 | 3 FR-Overall  | 1 | 1 | 0 | 0 |
| 33 | 2 FR | 2020-15 | 3 FR-Overall  | 1 | 2 | 0 | 0 |
| 34 | 2 FR | 2020-15 | 3 FR-Overall  | 1 | 3 | 0 | 0 |
| 35 | 2 FR | 2020-15 | 3 FR-Overall  | 1 | 4 | 0 | 0 |
| 36 | 2 FR | 2020-15 | 3 FR-Overall  | 1 | 5 | 0 | 0 |
| 37 | 2 FR | 2020-15 | 3 FR-Overall  | 2 | 1 | 0 | 0 |
| 38 | 2 FR | 2020-15 | 3 FR-Overall  | 2 | 2 | 0 | 0 |
| 39 | 2 FR | 2020-15 | 3 FR-Overall  | 2 | 3 | 0 | 0 |
| 40 | 2 FR | 2020-15 | 3 FR-Overall  | 2 | 4 | 0 | 0 |
| 41 | 2 FR | 2020-15 | 3 FR-Overall  | 2 | 5 | 0 | 0 |
| 42 | 2 FR | 2020-15 | 3 FR-Overall  | 3 | 1 | 0 | 0 |
| 43 | 2 FR | 2020-15 | 3 FR-Overall  | 3 | 2 | 0 | 0 |
| 44 | 2 FR | 2020-15 | 3 FR-Overall  | 3 | 3 | 0 | 0 |
| 45 | 2 FR | 2020-15 | 3 FR-Overall  | 3 | 4 | 0 | 0 |
| 46 | 2 FR | 2020-15 | 3 FR-Overall  | 3 | 5 | 0 | 0 |
| 47 | 2 FR | 2020-15 | 3 FR-South E  | 1 | 1 | 0 | 0 |
| 48 | 2 FR | 2020-15 | 3 FR-South E  | 1 | 2 | 0 | 0 |
| 49 | 2 FR | 2020-15 | 3 FR-South E  | 1 | 3 | 0 | 0 |
| 50 | 2 FR | 2020-15 | 3 FR-South E  | 1 | 4 | 0 | 0 |
| 51 | 2 FR | 2020-15 | 3 FR-South E  | 1 | 5 | 0 | 0 |
| 52 | 2 FR | 2020-15 | 3 FR-South E  | 2 | 1 | 0 | 0 |
| 53 | 2 FR | 2020-15 | 3 FR-South E  | 2 | 2 | 0 | 0 |
| 54 | 2 FR | 2020-15 | 3 FR-South E  | 2 | 3 | 0 | 0 |
| 55 | 2 FR | 2020-15 | 3 FR-South E  | 2 | 4 | 0 | 0 |
| 56 | 2 FR | 2020-15 | 3 FR-South E  | 2 | 5 | 0 | 0 |
| 57 | 2 FR | 2020-15 | 3 FR-South E  | 3 | 1 | 0 | 0 |
| 58 | 2 FR | 2020-15 | 3 FR-South E  | 3 | 2 | 0 | 0 |
| 59 | 2 FR | 2020-15 | 3 FR-South E  | 3 | 3 | 0 | 0 |
| 60 | 2 FR | 2020-15 | 3 FR-South E  | 3 | 3 | 0 | 0 |

|    |      |         |               |   |   |       |       |  |
|----|------|---------|---------------|---|---|-------|-------|--|
| 1  |      |         |               |   |   |       |       |  |
| 2  |      |         |               |   |   |       |       |  |
| 3  | 2 FR | 2020-15 | 3 FR-South E  | 3 | 4 | 0     | 0     |  |
| 4  | 2 FR | 2020-15 | 3 FR-South E  | 3 | 5 | 0     | 0     |  |
| 5  | 2 FR | 2020-15 | 3 FR-South V  | 1 | 1 | 0     | 0     |  |
| 6  | 2 FR | 2020-15 | 3 FR-South V  | 1 | 2 | 0     | 0     |  |
| 7  | 2 FR | 2020-15 | 3 FR-South V  | 1 | 3 | 0     | 0     |  |
| 8  | 2 FR | 2020-15 | 3 FR-South V  | 1 | 4 | 0     | 0     |  |
| 9  | 2 FR | 2020-15 | 3 FR-South V  | 1 | 5 | 0     | 0     |  |
| 10 | 2 FR | 2020-15 | 3 FR-South V  | 2 | 1 | 0     | 0     |  |
| 11 | 2 FR | 2020-15 | 3 FR-South V  | 2 | 2 | 0     | 0     |  |
| 12 | 2 FR | 2020-15 | 3 FR-South V  | 2 | 3 | 0     | 0     |  |
| 13 | 2 FR | 2020-15 | 3 FR-South V  | 2 | 4 | 0     | 0     |  |
| 14 | 2 FR | 2020-15 | 3 FR-South V  | 2 | 5 | 0     | 0     |  |
| 15 | 2 FR | 2020-15 | 3 FR-South V  | 3 | 1 | 0     | 0     |  |
| 16 | 2 FR | 2020-15 | 3 FR-South V  | 3 | 2 | 0     | 0     |  |
| 17 | 2 FR | 2020-15 | 3 FR-South V  | 3 | 3 | 0     | 0     |  |
| 18 | 2 FR | 2020-15 | 3 FR-South V  | 3 | 4 | 0     | 0     |  |
| 19 | 2 FR | 2020-15 | 3 FR-South V  | 3 | 5 | 0     | 0     |  |
| 20 | 2 FR | 2020-15 | 3 FR-South V  | 3 | 5 | 0     | 0     |  |
| 21 | 2 FR | 2020-15 | 3 FR-West     | 1 | 1 | 0     | 0     |  |
| 22 | 2 FR | 2020-15 | 3 FR-West     | 1 | 2 | 0     | 0     |  |
| 23 | 2 FR | 2020-15 | 3 FR-West     | 1 | 3 | 0     | 0     |  |
| 24 | 2 FR | 2020-15 | 3 FR-West     | 1 | 4 | 0     | 0     |  |
| 25 | 2 FR | 2020-15 | 3 FR-West     | 1 | 5 | 0     | 0     |  |
| 26 | 2 FR | 2020-15 | 3 FR-West     | 2 | 1 | 0     | 0     |  |
| 27 | 2 FR | 2020-15 | 3 FR-West     | 2 | 2 | 0     | 0     |  |
| 28 | 2 FR | 2020-15 | 3 FR-West     | 2 | 3 | 0     | 0     |  |
| 29 | 2 FR | 2020-15 | 3 FR-West     | 2 | 4 | 0     | 0     |  |
| 30 | 2 FR | 2020-15 | 3 FR-West     | 2 | 5 | 0     | 0     |  |
| 31 | 2 FR | 2020-15 | 3 FR-West     | 3 | 1 | 0     | 0     |  |
| 32 | 2 FR | 2020-15 | 3 FR-West     | 3 | 2 | 0     | 0     |  |
| 33 | 2 FR | 2020-15 | 3 FR-West     | 3 | 3 | 0     | 0     |  |
| 34 | 2 FR | 2020-15 | 3 FR-West     | 3 | 4 | 0     | 0     |  |
| 35 | 2 FR | 2020-15 | 3 FR-West     | 3 | 5 | 0     | 0     |  |
| 36 | 2 FR | 2020-15 | 4 FR-Corse    | 1 | 1 | ##### | ##### |  |
| 37 | 2 FR | 2020-15 | 4 FR-Corse    | 1 | 3 | 0     | 0     |  |
| 38 | 2 FR | 2020-15 | 4 FR-Corse    | 1 | 4 | ##### | ##### |  |
| 39 | 2 FR | 2020-15 | 4 FR-Corse    | 1 | 5 | 0     | 0     |  |
| 40 | 2 FR | 2020-15 | 4 FR-Corse    | 2 | 1 | 0     | 0     |  |
| 41 | 2 FR | 2020-15 | 4 FR-Corse    | 2 | 3 | 0     | 0     |  |
| 42 | 2 FR | 2020-15 | 4 FR-Corse    | 2 | 4 | 0     | 0     |  |
| 43 | 2 FR | 2020-15 | 4 FR-Corse    | 2 | 5 | 0     | 0     |  |
| 44 | 2 FR | 2020-15 | 4 FR-Corse    | 3 | 1 | ##### | ##### |  |
| 45 | 2 FR | 2020-15 | 4 FR-Corse    | 3 | 4 | 1.5   | ##### |  |
| 46 | 2 FR | 2020-15 | 4 FR-Corse    | 3 | 5 | 0     | 0     |  |
| 47 | 2 FR | 2020-15 | 4 FR-Ile de F | 1 | 1 | ##### | ##### |  |
| 48 | 2 FR | 2020-15 | 4 FR-Ile de F | 1 | 2 | ##### | ##### |  |
| 49 | 2 FR | 2020-15 | 4 FR-Ile de F | 1 | 3 | ##### | ##### |  |
| 50 | 2 FR | 2020-15 | 4 FR-Ile de F | 1 | 4 | ##### | ##### |  |
| 51 | 2 FR | 2020-15 | 4 FR-Ile de F | 1 | 5 | ##### | ##### |  |
| 52 | 2 FR | 2020-15 | 4 FR-Ile de F | 2 | 1 | ##### | ##### |  |
| 53 | 2 FR | 2020-15 | 4 FR-Ile de F | 2 | 2 | ##### | ##### |  |
| 54 | 2 FR | 2020-15 | 4 FR-Ile de F | 2 | 3 | ##### | ##### |  |
| 55 | 2 FR | 2020-15 | 4 FR-Ile de F | 2 | 4 | ##### | ##### |  |
| 56 | 2 FR | 2020-15 | 4 FR-Ile de F | 2 | 4 | ##### | ##### |  |
| 57 | 2 FR | 2020-15 | 4 FR-Ile de F | 2 | 5 | 0     | 0     |  |
| 58 | 2 FR | 2020-15 | 4 FR-Ile de F | 3 | 1 | ##### | ##### |  |
| 59 | 2 FR | 2020-15 | 4 FR-Ile de F | 3 | 2 | ##### | ##### |  |
| 60 | 2 FR | 2020-15 | 4 FR-Ile de F | 3 | 3 | ##### | ##### |  |

|    |      |         |               |   |   |          |          |  |
|----|------|---------|---------------|---|---|----------|----------|--|
| 1  |      |         |               |   |   |          |          |  |
| 2  |      |         |               |   |   |          |          |  |
| 3  | 2 FR | 2020-15 | 4 FR-Ile de F | 3 | 4 | #####    | #####    |  |
| 4  | 2 FR | 2020-15 | 4 FR-Ile de F | 3 | 5 | #####    | #####    |  |
| 5  | 2 FR | 2020-15 | 4 FR-North E  | 1 | 1 | #####    | #####    |  |
| 6  | 2 FR | 2020-15 | 4 FR-North E  | 1 | 2 | #####    | #####    |  |
| 7  | 2 FR | 2020-15 | 4 FR-North E  | 1 | 3 | 1.228091 | #####    |  |
| 8  | 2 FR | 2020-15 | 4 FR-North E  | 1 | 4 | #####    | #####    |  |
| 9  | 2 FR | 2020-15 | 4 FR-North E  | 1 | 5 | 0        | 0        |  |
| 10 | 2 FR | 2020-15 | 4 FR-North E  | 2 | 1 | #####    | #####    |  |
| 11 | 2 FR | 2020-15 | 4 FR-North E  | 2 | 2 | 0        | 0        |  |
| 12 | 2 FR | 2020-15 | 4 FR-North E  | 2 | 3 | #####    | #####    |  |
| 13 | 2 FR | 2020-15 | 4 FR-North E  | 2 | 4 | 0.5      | #####    |  |
| 14 | 2 FR | 2020-15 | 4 FR-North E  | 2 | 5 | 0        | 0        |  |
| 15 | 2 FR | 2020-15 | 4 FR-North E  | 3 | 1 | #####    | #####    |  |
| 16 | 2 FR | 2020-15 | 4 FR-North E  | 3 | 2 | #####    | #####    |  |
| 17 | 2 FR | 2020-15 | 4 FR-North E  | 3 | 3 | 1.566667 | #####    |  |
| 18 | 2 FR | 2020-15 | 4 FR-North E  | 3 | 4 | #####    | #####    |  |
| 19 | 2 FR | 2020-15 | 4 FR-North E  | 3 | 5 | 0        | 0        |  |
| 20 | 2 FR | 2020-15 | 4 FR-Overall  | 1 | 1 | #####    | #####    |  |
| 21 | 2 FR | 2020-15 | 4 FR-Overall  | 1 | 2 | #####    | #####    |  |
| 22 | 2 FR | 2020-15 | 4 FR-Overall  | 1 | 3 | 1.226839 | #####    |  |
| 23 | 2 FR | 2020-15 | 4 FR-Overall  | 1 | 4 | 1.005708 | #####    |  |
| 24 | 2 FR | 2020-15 | 4 FR-Overall  | 1 | 5 | #####    | #####    |  |
| 25 | 2 FR | 2020-15 | 4 FR-Overall  | 2 | 1 | #####    | #####    |  |
| 26 | 2 FR | 2020-15 | 4 FR-Overall  | 2 | 2 | #####    | #####    |  |
| 27 | 2 FR | 2020-15 | 4 FR-Overall  | 2 | 3 | #####    | #####    |  |
| 28 | 2 FR | 2020-15 | 4 FR-Overall  | 2 | 4 | #####    | #####    |  |
| 29 | 2 FR | 2020-15 | 4 FR-Overall  | 2 | 5 | #####    | #####    |  |
| 30 | 2 FR | 2020-15 | 4 FR-Overall  | 3 | 1 | 1.002469 | #####    |  |
| 31 | 2 FR | 2020-15 | 4 FR-Overall  | 3 | 2 | #####    | #####    |  |
| 32 | 2 FR | 2020-15 | 4 FR-Overall  | 3 | 3 | 1.494596 | #####    |  |
| 33 | 2 FR | 2020-15 | 4 FR-Overall  | 3 | 4 | 1.122937 | #####    |  |
| 34 | 2 FR | 2020-15 | 4 FR-Overall  | 3 | 5 | #####    | #####    |  |
| 35 | 2 FR | 2020-15 | 4 FR-Overall  | 3 | 5 | #####    | #####    |  |
| 36 | 2 FR | 2020-15 | 4 FR-South E  | 1 | 1 | 1.189583 | #####    |  |
| 37 | 2 FR | 2020-15 | 4 FR-South E  | 1 | 2 | 1.109274 | #####    |  |
| 38 | 2 FR | 2020-15 | 4 FR-South E  | 1 | 3 | 1.847483 | #####    |  |
| 39 | 2 FR | 2020-15 | 4 FR-South E  | 1 | 4 | 1.426417 | #####    |  |
| 40 | 2 FR | 2020-15 | 4 FR-South E  | 1 | 5 | 0        | 0        |  |
| 41 | 2 FR | 2020-15 | 4 FR-South E  | 2 | 1 | #####    | #####    |  |
| 42 | 2 FR | 2020-15 | 4 FR-South E  | 2 | 2 | 1.484848 | #####    |  |
| 43 | 2 FR | 2020-15 | 4 FR-South E  | 2 | 3 | #####    | #####    |  |
| 44 | 2 FR | 2020-15 | 4 FR-South E  | 2 | 4 | 1.367089 | #####    |  |
| 45 | 2 FR | 2020-15 | 4 FR-South E  | 2 | 5 | 0        | 0        |  |
| 46 | 2 FR | 2020-15 | 4 FR-South E  | 3 | 1 | 1.465423 | #####    |  |
| 47 | 2 FR | 2020-15 | 4 FR-South E  | 3 | 2 | #####    | #####    |  |
| 48 | 2 FR | 2020-15 | 4 FR-South E  | 3 | 3 | 2.8      | 1.149727 |  |
| 49 | 2 FR | 2020-15 | 4 FR-South E  | 3 | 4 | 1.5      | #####    |  |
| 50 | 2 FR | 2020-15 | 4 FR-South E  | 3 | 5 | 0        | 0        |  |
| 51 | 2 FR | 2020-15 | 4 FR-South V  | 1 | 1 | #####    | #####    |  |
| 52 | 2 FR | 2020-15 | 4 FR-South V  | 1 | 2 | #####    | #####    |  |
| 53 | 2 FR | 2020-15 | 4 FR-South V  | 1 | 3 | #####    | #####    |  |
| 54 | 2 FR | 2020-15 | 4 FR-South V  | 1 | 4 | 1.392771 | #####    |  |
| 55 | 2 FR | 2020-15 | 4 FR-South V  | 1 | 5 | #####    | #####    |  |
| 56 | 2 FR | 2020-15 | 4 FR-South V  | 2 | 1 | #####    | #####    |  |
| 57 | 2 FR | 2020-15 | 4 FR-South V  | 2 | 2 | #####    | #####    |  |
| 58 | 2 FR | 2020-15 | 4 FR-South V  | 2 | 3 | #####    | #####    |  |
| 59 | 2 FR | 2020-15 | 4 FR-South V  | 2 | 4 | #####    | #####    |  |
| 60 | 2 FR | 2020-15 | 4 FR-South V  | 2 | 4 | #####    | #####    |  |

|    |      |         |               |   |   |          |          |  |
|----|------|---------|---------------|---|---|----------|----------|--|
| 1  |      |         |               |   |   |          |          |  |
| 2  |      |         |               |   |   |          |          |  |
| 3  | 2 FR | 2020-15 | 4 FR-South V  | 2 | 5 | #####    | #####    |  |
| 4  | 2 FR | 2020-15 | 4 FR-South V  | 3 | 1 | #####    | #####    |  |
| 5  | 2 FR | 2020-15 | 4 FR-South V  | 3 | 2 | #####    | #####    |  |
| 6  | 2 FR | 2020-15 | 4 FR-South V  | 3 | 3 | #####    | #####    |  |
| 7  | 2 FR | 2020-15 | 4 FR-South V  | 3 | 4 | 1.705882 | #####    |  |
| 8  | 2 FR | 2020-15 | 4 FR-South V  | 3 | 5 | 0        | 0        |  |
| 9  | 2 FR | 2020-15 | 4 FR-West     | 1 | 1 | 1.166428 | #####    |  |
| 10 | 2 FR | 2020-15 | 4 FR-West     | 1 | 2 | 1.666286 | #####    |  |
| 11 | 2 FR | 2020-15 | 4 FR-West     | 1 | 3 | 1.666463 | #####    |  |
| 12 | 2 FR | 2020-15 | 4 FR-West     | 1 | 4 | 1.068819 | #####    |  |
| 13 | 2 FR | 2020-15 | 4 FR-West     | 1 | 5 | #####    | #####    |  |
| 14 | 2 FR | 2020-15 | 4 FR-West     | 2 | 1 | 1.011429 | #####    |  |
| 15 | 2 FR | 2020-15 | 4 FR-West     | 2 | 2 | 1.333333 | #####    |  |
| 16 | 2 FR | 2020-15 | 4 FR-West     | 2 | 3 | 1.8125   | #####    |  |
| 17 | 2 FR | 2020-15 | 4 FR-West     | 2 | 4 | #####    | #####    |  |
| 18 | 2 FR | 2020-15 | 4 FR-West     | 2 | 5 | #####    | #####    |  |
| 19 | 2 FR | 2020-15 | 4 FR-West     | 3 | 1 | 1.347094 | #####    |  |
| 20 | 2 FR | 2020-15 | 4 FR-West     | 3 | 2 | 2        | 1.316696 |  |
| 21 | 2 FR | 2020-15 | 4 FR-West     | 3 | 3 | 1.535714 | #####    |  |
| 22 | 2 FR | 2020-15 | 4 FR-West     | 3 | 4 | 1.275862 | #####    |  |
| 23 | 2 FR | 2020-15 | 4 FR-West     | 3 | 5 | 0        | 0        |  |
| 24 | 2 FR | 2020-15 | 5 FR-Corse    | 1 | 1 | 0        | 0        |  |
| 25 | 2 FR | 2020-15 | 5 FR-Corse    | 1 | 3 | 0        | 0        |  |
| 26 | 2 FR | 2020-15 | 5 FR-Corse    | 1 | 4 | 0        | 0        |  |
| 27 | 2 FR | 2020-15 | 5 FR-Corse    | 1 | 5 | 0        | 0        |  |
| 28 | 2 FR | 2020-15 | 5 FR-Corse    | 2 | 1 | 0        | 0        |  |
| 29 | 2 FR | 2020-15 | 5 FR-Corse    | 2 | 3 | 0        | 0        |  |
| 30 | 2 FR | 2020-15 | 5 FR-Corse    | 2 | 4 | 0        | 0        |  |
| 31 | 2 FR | 2020-15 | 5 FR-Corse    | 2 | 5 | 0        | 0        |  |
| 32 | 2 FR | 2020-15 | 5 FR-Corse    | 3 | 1 | 0        | 0        |  |
| 33 | 2 FR | 2020-15 | 5 FR-Corse    | 3 | 4 | 0        | 0        |  |
| 34 | 2 FR | 2020-15 | 5 FR-Corse    | 3 | 5 | 0        | 0        |  |
| 35 | 2 FR | 2020-15 | 5 FR-Corse    | 3 | 5 | 0        | 0        |  |
| 36 | 2 FR | 2020-15 | 5 FR-Ile de F | 1 | 1 | #####    | #####    |  |
| 37 | 2 FR | 2020-15 | 5 FR-Ile de F | 1 | 2 | #####    | #####    |  |
| 38 | 2 FR | 2020-15 | 5 FR-Ile de F | 1 | 3 | #####    | #####    |  |
| 39 | 2 FR | 2020-15 | 5 FR-Ile de F | 1 | 4 | #####    | #####    |  |
| 40 | 2 FR | 2020-15 | 5 FR-Ile de F | 1 | 5 | #####    | #####    |  |
| 41 | 2 FR | 2020-15 | 5 FR-Ile de F | 2 | 1 | #####    | #####    |  |
| 42 | 2 FR | 2020-15 | 5 FR-Ile de F | 2 | 2 | #####    | #####    |  |
| 43 | 2 FR | 2020-15 | 5 FR-Ile de F | 2 | 3 | #####    | #####    |  |
| 44 | 2 FR | 2020-15 | 5 FR-Ile de F | 2 | 4 | #####    | #####    |  |
| 45 | 2 FR | 2020-15 | 5 FR-Ile de F | 2 | 5 | #####    | #####    |  |
| 46 | 2 FR | 2020-15 | 5 FR-Ile de F | 3 | 1 | #####    | #####    |  |
| 47 | 2 FR | 2020-15 | 5 FR-Ile de F | 3 | 2 | #####    | #####    |  |
| 48 | 2 FR | 2020-15 | 5 FR-Ile de F | 3 | 3 | #####    | #####    |  |
| 49 | 2 FR | 2020-15 | 5 FR-Ile de F | 3 | 4 | 1.066667 | #####    |  |
| 50 | 2 FR | 2020-15 | 5 FR-Ile de F | 3 | 5 | 0.75     | #####    |  |
| 51 | 2 FR | 2020-15 | 5 FR-North E  | 1 | 1 | #####    | #####    |  |
| 52 | 2 FR | 2020-15 | 5 FR-North E  | 1 | 2 | #####    | #####    |  |
| 53 | 2 FR | 2020-15 | 5 FR-North E  | 1 | 3 | #####    | #####    |  |
| 54 | 2 FR | 2020-15 | 5 FR-North E  | 1 | 4 | #####    | #####    |  |
| 55 | 2 FR | 2020-15 | 5 FR-North E  | 1 | 5 | #####    | #####    |  |
| 56 | 2 FR | 2020-15 | 5 FR-North E  | 2 | 1 | #####    | #####    |  |
| 57 | 2 FR | 2020-15 | 5 FR-North E  | 2 | 2 | #####    | #####    |  |
| 58 | 2 FR | 2020-15 | 5 FR-North E  | 2 | 3 | 0.40625  | #####    |  |
| 59 | 2 FR | 2020-15 | 5 FR-North E  | 2 | 4 | #####    | #####    |  |
| 60 | 2 FR | 2020-15 | 5 FR-North E  | 2 | 4 | #####    | #####    |  |

1  
2  
3  
4  
5  
6  
7  
8  
9  
10  
11  
12  
13  
14  
15  
16  
17  
18  
19  
20  
21  
22  
23  
24  
25  
26  
27  
28  
29  
30  
31  
32  
33  
34  
35  
36  
37  
38  
39  
40  
41  
42  
43  
44  
45  
46  
47  
48  
49  
50  
51  
52  
53  
54  
55  
56  
57  
58  
59  
60

|      |         |              |   |   |       |       |
|------|---------|--------------|---|---|-------|-------|
| 2 FR | 2020-15 | 5 FR-North E | 2 | 5 | 0.75  | ##### |
| 2 FR | 2020-15 | 5 FR-North E | 3 | 1 | ##### | ##### |
| 2 FR | 2020-15 | 5 FR-North E | 3 | 2 | ##### | ##### |
| 2 FR | 2020-15 | 5 FR-North E | 3 | 3 | ##### | ##### |
| 2 FR | 2020-15 | 5 FR-North E | 3 | 4 | 0.3   | ##### |
| 2 FR | 2020-15 | 5 FR-North E | 3 | 5 | ##### | ##### |
| 2 FR | 2020-15 | 5 FR-Overall | 1 | 1 | ##### | ##### |
| 2 FR | 2020-15 | 5 FR-Overall | 1 | 2 | ##### | ##### |
| 2 FR | 2020-15 | 5 FR-Overall | 1 | 3 | ##### | ##### |
| 2 FR | 2020-15 | 5 FR-Overall | 1 | 4 | ##### | ##### |
| 2 FR | 2020-15 | 5 FR-Overall | 1 | 5 | ##### | ##### |
| 2 FR | 2020-15 | 5 FR-Overall | 2 | 1 | ##### | ##### |
| 2 FR | 2020-15 | 5 FR-Overall | 2 | 2 | ##### | ##### |
| 2 FR | 2020-15 | 5 FR-Overall | 2 | 3 | ##### | ##### |
| 2 FR | 2020-15 | 5 FR-Overall | 2 | 4 | ##### | ##### |
| 2 FR | 2020-15 | 5 FR-Overall | 2 | 5 | ##### | ##### |
| 2 FR | 2020-15 | 5 FR-Overall | 3 | 1 | ##### | ##### |
| 2 FR | 2020-15 | 5 FR-Overall | 3 | 2 | ##### | ##### |
| 2 FR | 2020-15 | 5 FR-Overall | 3 | 3 | ##### | ##### |
| 2 FR | 2020-15 | 5 FR-Overall | 3 | 4 | ##### | ##### |
| 2 FR | 2020-15 | 5 FR-Overall | 3 | 5 | ##### | ##### |
| 2 FR | 2020-15 | 5 FR-South E | 1 | 1 | ##### | ##### |
| 2 FR | 2020-15 | 5 FR-South E | 1 | 2 | ##### | ##### |
| 2 FR | 2020-15 | 5 FR-South E | 1 | 3 | ##### | ##### |
| 2 FR | 2020-15 | 5 FR-South E | 1 | 4 | ##### | ##### |
| 2 FR | 2020-15 | 5 FR-South E | 1 | 5 | ##### | ##### |
| 2 FR | 2020-15 | 5 FR-South E | 2 | 1 | ##### | ##### |
| 2 FR | 2020-15 | 5 FR-South E | 2 | 2 | ##### | ##### |
| 2 FR | 2020-15 | 5 FR-South E | 2 | 3 | ##### | ##### |
| 2 FR | 2020-15 | 5 FR-South E | 2 | 4 | ##### | ##### |
| 2 FR | 2020-15 | 5 FR-South E | 2 | 5 | 0.5   | ##### |
| 2 FR | 2020-15 | 5 FR-South E | 3 | 1 | ##### | ##### |
| 2 FR | 2020-15 | 5 FR-South E | 3 | 2 | ##### | ##### |
| 2 FR | 2020-15 | 5 FR-South E | 3 | 3 | 0.32  | ##### |
| 2 FR | 2020-15 | 5 FR-South E | 3 | 4 | ##### | ##### |
| 2 FR | 2020-15 | 5 FR-South E | 3 | 5 | ##### | ##### |
| 2 FR | 2020-15 | 5 FR-South V | 1 | 1 | ##### | ##### |
| 2 FR | 2020-15 | 5 FR-South V | 1 | 2 | ##### | ##### |
| 2 FR | 2020-15 | 5 FR-South V | 1 | 3 | ##### | ##### |
| 2 FR | 2020-15 | 5 FR-South V | 1 | 4 | ##### | ##### |
| 2 FR | 2020-15 | 5 FR-South V | 1 | 5 | ##### | ##### |
| 2 FR | 2020-15 | 5 FR-South V | 2 | 1 | ##### | ##### |
| 2 FR | 2020-15 | 5 FR-South V | 2 | 2 | ##### | ##### |
| 2 FR | 2020-15 | 5 FR-South V | 2 | 3 | ##### | ##### |
| 2 FR | 2020-15 | 5 FR-South V | 2 | 4 | ##### | ##### |
| 2 FR | 2020-15 | 5 FR-South V | 2 | 5 | 0.28  | ##### |
| 2 FR | 2020-15 | 5 FR-South V | 3 | 1 | ##### | ##### |
| 2 FR | 2020-15 | 5 FR-South V | 3 | 2 | ##### | ##### |
| 2 FR | 2020-15 | 5 FR-South V | 3 | 3 | 0.375 | ##### |
| 2 FR | 2020-15 | 5 FR-South V | 3 | 4 | ##### | ##### |
| 2 FR | 2020-15 | 5 FR-South V | 3 | 5 | ##### | ##### |
| 2 FR | 2020-15 | 5 FR-West    | 1 | 1 | ##### | ##### |
| 2 FR | 2020-15 | 5 FR-West    | 1 | 2 | ##### | ##### |
| 2 FR | 2020-15 | 5 FR-West    | 1 | 3 | ##### | ##### |
| 2 FR | 2020-15 | 5 FR-West    | 1 | 4 | ##### | ##### |
| 2 FR | 2020-15 | 5 FR-West    | 1 | 5 | ##### | ##### |

|    |      |         |                |   |   |          |       |
|----|------|---------|----------------|---|---|----------|-------|
| 1  |      |         |                |   |   |          |       |
| 2  |      |         |                |   |   |          |       |
| 3  | 2 FR | 2020-15 | 5 FR-West      | 2 | 1 | #####    | ##### |
| 4  | 2 FR | 2020-15 | 5 FR-West      | 2 | 2 | #####    | ##### |
| 5  | 2 FR | 2020-15 | 5 FR-West      | 2 | 3 | 0.5625   | ##### |
| 6  | 2 FR | 2020-15 | 5 FR-West      | 2 | 4 | #####    | ##### |
| 7  | 2 FR | 2020-15 | 5 FR-West      | 2 | 5 | 0.46875  | ##### |
| 8  | 2 FR | 2020-15 | 5 FR-West      | 3 | 1 | #####    | ##### |
| 9  | 2 FR | 2020-15 | 5 FR-West      | 3 | 2 | #####    | ##### |
| 10 | 2 FR | 2020-15 | 5 FR-West      | 3 | 3 | #####    | ##### |
| 11 | 2 FR | 2020-15 | 5 FR-West      | 3 | 4 | #####    | ##### |
| 12 | 2 FR | 2020-15 | 5 FR-West      | 3 | 5 | 1        | ##### |
| 13 | 2 IT | 2020-11 | 1 IT-Central   | 1 | 1 | 3.554254 | ##### |
| 14 | 2 IT | 2020-11 | 1 IT-Central   | 1 | 2 | 3.470485 | ##### |
| 15 | 2 IT | 2020-11 | 1 IT-Central   | 1 | 3 | 4.40065  | ##### |
| 16 | 2 IT | 2020-11 | 1 IT-Central   | 1 | 4 | 3.647088 | ##### |
| 17 | 2 IT | 2020-11 | 1 IT-Central   | 1 | 5 | 2.509791 | ##### |
| 18 | 2 IT | 2020-11 | 1 IT-Central   | 2 | 1 | 2.832354 | ##### |
| 19 | 2 IT | 2020-11 | 1 IT-Central   | 2 | 2 | 2.623188 | ##### |
| 20 | 2 IT | 2020-11 | 1 IT-Central   | 2 | 3 | 3.230769 | ##### |
| 21 | 2 IT | 2020-11 | 1 IT-Central   | 2 | 4 | 2.902778 | ##### |
| 22 | 2 IT | 2020-11 | 1 IT-Central   | 2 | 5 | 2.5      | ##### |
| 23 | 2 IT | 2020-11 | 1 IT-Central   | 3 | 1 | 4.093445 | ##### |
| 24 | 2 IT | 2020-11 | 1 IT-Central   | 3 | 2 | 4.225806 | ##### |
| 25 | 2 IT | 2020-11 | 1 IT-Central   | 3 | 3 | 5.142857 | ##### |
| 26 | 2 IT | 2020-11 | 1 IT-Central   | 3 | 4 | 4.16129  | ##### |
| 27 | 2 IT | 2020-11 | 1 IT-Central   | 3 | 5 | 2.518519 | ##### |
| 28 | 2 IT | 2020-11 | 1 IT-Insular   | 1 | 1 | 3.291168 | ##### |
| 29 | 2 IT | 2020-11 | 1 IT-Insular   | 1 | 2 | 3.301086 | ##### |
| 30 | 2 IT | 2020-11 | 1 IT-Insular   | 1 | 3 | 3.122614 | ##### |
| 31 | 2 IT | 2020-11 | 1 IT-Insular   | 1 | 4 | 4.62753  | ##### |
| 32 | 2 IT | 2020-11 | 1 IT-Insular   | 1 | 5 | 1.722159 | ##### |
| 33 | 2 IT | 2020-11 | 1 IT-Insular   | 2 | 1 | 2.805128 | ##### |
| 34 | 2 IT | 2020-11 | 1 IT-Insular   | 2 | 2 | 2.702703 | ##### |
| 35 | 2 IT | 2020-11 | 1 IT-Insular   | 2 | 3 | 2.338235 | ##### |
| 36 | 2 IT | 2020-11 | 1 IT-Insular   | 2 | 4 | 4.5625   | ##### |
| 37 | 2 IT | 2020-11 | 1 IT-Insular   | 2 | 5 | 1.391304 | ##### |
| 38 | 2 IT | 2020-11 | 1 IT-Insular   | 3 | 1 | 3.678122 | ##### |
| 39 | 2 IT | 2020-11 | 1 IT-Insular   | 3 | 2 | 3.592593 | ##### |
| 40 | 2 IT | 2020-11 | 1 IT-Insular   | 3 | 3 | 3.710526 | ##### |
| 41 | 2 IT | 2020-11 | 1 IT-Insular   | 3 | 4 | 4.678571 | ##### |
| 42 | 2 IT | 2020-11 | 1 IT-Insular   | 3 | 5 | 2.111111 | ##### |
| 43 | 2 IT | 2020-11 | 1 IT-Northeast | 1 | 1 | 3.877376 | ##### |
| 44 | 2 IT | 2020-11 | 1 IT-Northeast | 1 | 2 | 4.265778 | ##### |
| 45 | 2 IT | 2020-11 | 1 IT-Northeast | 1 | 3 | 4.944164 | ##### |
| 46 | 2 IT | 2020-11 | 1 IT-Northeast | 1 | 4 | 4.207484 | ##### |
| 47 | 2 IT | 2020-11 | 1 IT-Northeast | 1 | 5 | 1.834543 | ##### |
| 48 | 2 IT | 2020-11 | 1 IT-Northeast | 2 | 1 | 3.186909 | ##### |
| 49 | 2 IT | 2020-11 | 1 IT-Northeast | 2 | 2 | 4.428571 | ##### |
| 50 | 2 IT | 2020-11 | 1 IT-Northeast | 2 | 3 | 3.573913 | ##### |
| 51 | 2 IT | 2020-11 | 1 IT-Northeast | 2 | 4 | 3.741935 | ##### |
| 52 | 2 IT | 2020-11 | 1 IT-Northeast | 2 | 5 | 1.612903 | ##### |
| 53 | 2 IT | 2020-11 | 1 IT-Northeast | 3 | 1 | 4.403208 | ##### |
| 54 | 2 IT | 2020-11 | 1 IT-Northeast | 3 | 2 | 4.142857 | ##### |
| 55 | 2 IT | 2020-11 | 1 IT-Northeast | 3 | 3 | 5.953488 | ##### |
| 56 | 2 IT | 2020-11 | 1 IT-Northeast | 3 | 4 | 4.484375 | ##### |
| 57 | 2 IT | 2020-11 | 1 IT-Northeast | 3 | 5 | 2.076923 | ##### |
| 58 | 2 IT | 2020-11 | 1 IT-Northeast | 3 | 5 | 2.076923 | ##### |
| 59 | 2 IT | 2020-11 | 1 IT-Northeast | 3 | 5 | 2.076923 | ##### |
| 60 | 2 IT | 2020-11 | 1 IT-Northeast | 1 | 1 | 3.572583 | ##### |

1  
2  
3  
4  
5  
6  
7  
8  
9  
10  
11  
12  
13  
14  
15  
16  
17  
18  
19  
20  
21  
22  
23  
24  
25  
26  
27  
28  
29  
30  
31  
32  
33  
34  
35  
36  
37  
38  
39  
40  
41  
42  
43  
44  
45  
46  
47  
48  
49  
50  
51  
52  
53  
54  
55  
56  
57  
58  
59  
60

|      |         |              |   |   |          |       |
|------|---------|--------------|---|---|----------|-------|
| 2 IT | 2020-11 | 1 IT-Northwe | 1 | 2 | 3.532195 | ##### |
| 2 IT | 2020-11 | 1 IT-Northwe | 1 | 3 | 4.447169 | ##### |
| 2 IT | 2020-11 | 1 IT-Northwe | 1 | 4 | 4.167094 | ##### |
| 2 IT | 2020-11 | 1 IT-Northwe | 1 | 5 | 1.771698 | ##### |
| 2 IT | 2020-11 | 1 IT-Northwe | 2 | 1 | 2.845329 | ##### |
| 2 IT | 2020-11 | 1 IT-Northwe | 2 | 2 | 3.283951 | ##### |
| 2 IT | 2020-11 | 1 IT-Northwe | 2 | 3 | 3.649573 | ##### |
| 2 IT | 2020-11 | 1 IT-Northwe | 2 | 4 | 3.840909 | ##### |
| 2 IT | 2020-11 | 1 IT-Northwe | 2 | 5 | 1.113636 | ##### |
| 2 IT | 2020-11 | 1 IT-Northwe | 3 | 1 | 4.123766 | ##### |
| 2 IT | 2020-11 | 1 IT-Northwe | 3 | 2 | 3.702128 | ##### |
| 2 IT | 2020-11 | 1 IT-Northwe | 3 | 3 | 4.854167 | ##### |
| 2 IT | 2020-11 | 1 IT-Northwe | 3 | 4 | 4.4      | ##### |
| 2 IT | 2020-11 | 1 IT-Northwe | 3 | 5 | 2.666667 | ##### |
| 2 IT | 2020-11 | 1 IT-Overall | 1 | 1 | 3.536816 | ##### |
| 2 IT | 2020-11 | 1 IT-Overall | 1 | 2 | 3.584244 | ##### |
| 2 IT | 2020-11 | 1 IT-Overall | 1 | 3 | 4.282282 | ##### |
| 2 IT | 2020-11 | 1 IT-Overall | 1 | 4 | 3.853615 | ##### |
| 2 IT | 2020-11 | 1 IT-Overall | 1 | 5 | 2.139969 | ##### |
| 2 IT | 2020-11 | 1 IT-Overall | 2 | 1 | 2.945973 | ##### |
| 2 IT | 2020-11 | 1 IT-Overall | 2 | 2 | 3.372702 | ##### |
| 2 IT | 2020-11 | 1 IT-Overall | 2 | 3 | 3.240079 | ##### |
| 2 IT | 2020-11 | 1 IT-Overall | 2 | 4 | 3.655273 | ##### |
| 2 IT | 2020-11 | 1 IT-Overall | 2 | 5 | 1.685661 | ##### |
| 2 IT | 2020-11 | 1 IT-Overall | 3 | 1 | 3.962824 | ##### |
| 2 IT | 2020-11 | 1 IT-Overall | 3 | 2 | 3.717335 | ##### |
| 2 IT | 2020-11 | 1 IT-Overall | 3 | 3 | 4.932355 | ##### |
| 2 IT | 2020-11 | 1 IT-Overall | 3 | 4 | 3.985482 | ##### |
| 2 IT | 2020-11 | 1 IT-Overall | 3 | 5 | 2.615978 | ##### |
| 2 IT | 2020-11 | 1 IT-South   | 1 | 1 | 3.424622 | ##### |
| 2 IT | 2020-11 | 1 IT-South   | 1 | 2 | 3.479444 | ##### |
| 2 IT | 2020-11 | 1 IT-South   | 1 | 3 | 4.284105 | ##### |
| 2 IT | 2020-11 | 1 IT-South   | 1 | 4 | 3.104046 | ##### |
| 2 IT | 2020-11 | 1 IT-South   | 1 | 5 | 2.658045 | ##### |
| 2 IT | 2020-11 | 1 IT-South   | 2 | 1 | 3.065023 | ##### |
| 2 IT | 2020-11 | 1 IT-South   | 2 | 2 | 3.787879 | ##### |
| 2 IT | 2020-11 | 1 IT-South   | 2 | 3 | 3.290323 | ##### |
| 2 IT | 2020-11 | 1 IT-South   | 2 | 4 | 3.444444 | ##### |
| 2 IT | 2020-11 | 1 IT-South   | 2 | 5 | 1.888889 | ##### |
| 2 IT | 2020-11 | 1 IT-South   | 3 | 1 | 3.644564 | ##### |
| 2 IT | 2020-11 | 1 IT-South   | 3 | 2 | 3.333333 | ##### |
| 2 IT | 2020-11 | 1 IT-South   | 3 | 3 | 4.860465 | ##### |
| 2 IT | 2020-11 | 1 IT-South   | 3 | 4 | 2.903226 | ##### |
| 2 IT | 2020-11 | 1 IT-South   | 3 | 5 | 3.3125   | ##### |
| 2 IT | 2020-11 | 2 IT-Central | 1 | 1 | 1.75578  | ##### |
| 2 IT | 2020-11 | 2 IT-Central | 1 | 2 | 2.446818 | ##### |
| 2 IT | 2020-11 | 2 IT-Central | 1 | 3 | 1.749811 | ##### |
| 2 IT | 2020-11 | 2 IT-Central | 1 | 4 | 1.81091  | ##### |
| 2 IT | 2020-11 | 2 IT-Central | 1 | 5 | 1.25126  | ##### |
| 2 IT | 2020-11 | 2 IT-Central | 2 | 1 | 1.640957 | ##### |
| 2 IT | 2020-11 | 2 IT-Central | 2 | 2 | 2.232877 | ##### |
| 2 IT | 2020-11 | 2 IT-Central | 2 | 3 | 1.675676 | ##### |
| 2 IT | 2020-11 | 2 IT-Central | 2 | 4 | 1.74026  | ##### |
| 2 IT | 2020-11 | 2 IT-Central | 2 | 5 | 1.117647 | ##### |
| 2 IT | 2020-11 | 2 IT-Central | 3 | 1 | 1.839888 | ##### |
| 2 IT | 2020-11 | 2 IT-Central | 3 | 2 | 2.636364 | ##### |



|    |      |         |                |   |   |          |       |  |
|----|------|---------|----------------|---|---|----------|-------|--|
| 1  |      |         |                |   |   |          |       |  |
| 2  |      |         |                |   |   |          |       |  |
| 3  | 2 IT | 2020-11 | 2 IT-Central   | 3 | 3 | 1.797297 | ##### |  |
| 4  | 2 IT | 2020-11 | 2 IT-Central   | 3 | 4 | 1.857143 | ##### |  |
| 5  | 2 IT | 2020-11 | 2 IT-Central   | 3 | 5 | 1.37037  | ##### |  |
| 6  | 2 IT | 2020-11 | 2 IT-Insular   | 1 | 1 | 1.8898   | ##### |  |
| 7  | 2 IT | 2020-11 | 2 IT-Insular   | 1 | 2 | 2.448611 | ##### |  |
| 8  | 2 IT | 2020-11 | 2 IT-Insular   | 1 | 3 | 1.834958 | ##### |  |
| 9  | 2 IT | 2020-11 | 2 IT-Insular   | 1 | 4 | 2.162716 | ##### |  |
| 10 | 2 IT | 2020-11 | 2 IT-Insular   | 1 | 5 | 1.27803  | ##### |  |
| 11 | 2 IT | 2020-11 | 2 IT-Insular   | 2 | 1 | 1.577764 | ##### |  |
| 12 | 2 IT | 2020-11 | 2 IT-Insular   | 2 | 2 | 2.297297 | ##### |  |
| 13 | 2 IT | 2020-11 | 2 IT-Insular   | 2 | 3 | 1.768116 | ##### |  |
| 14 | 2 IT | 2020-11 | 2 IT-Insular   | 2 | 4 | 1.6875   | ##### |  |
| 15 | 2 IT | 2020-11 | 2 IT-Insular   | 2 | 5 | 1        | ##### |  |
| 16 | 2 IT | 2020-11 | 2 IT-Insular   | 3 | 1 | 2.118841 | ##### |  |
| 17 | 2 IT | 2020-11 | 2 IT-Insular   | 3 | 2 | 2.517241 | ##### |  |
| 18 | 2 IT | 2020-11 | 2 IT-Insular   | 3 | 3 | 1.880952 | ##### |  |
| 19 | 2 IT | 2020-11 | 2 IT-Insular   | 3 | 4 | 2.535714 | ##### |  |
| 20 | 2 IT | 2020-11 | 2 IT-Insular   | 3 | 5 | 1.545455 | ##### |  |
| 21 | 2 IT | 2020-11 | 2 IT-Northeast | 1 | 1 | 1.617901 | ##### |  |
| 22 | 2 IT | 2020-11 | 2 IT-Northeast | 1 | 2 | 2.529649 | ##### |  |
| 23 | 2 IT | 2020-11 | 2 IT-Northeast | 1 | 3 | 1.742416 | ##### |  |
| 24 | 2 IT | 2020-11 | 2 IT-Northeast | 1 | 4 | 1.487956 | ##### |  |
| 25 | 2 IT | 2020-11 | 2 IT-Northeast | 1 | 5 | 1.047223 | ##### |  |
| 26 | 2 IT | 2020-11 | 2 IT-Northeast | 2 | 1 | 1.635401 | ##### |  |
| 27 | 2 IT | 2020-11 | 2 IT-Northeast | 2 | 2 | 2.425    | ##### |  |
| 28 | 2 IT | 2020-11 | 2 IT-Northeast | 2 | 3 | 1.809917 | ##### |  |
| 29 | 2 IT | 2020-11 | 2 IT-Northeast | 2 | 4 | 1.59375  | ##### |  |
| 30 | 2 IT | 2020-11 | 2 IT-Northeast | 2 | 5 | 1.090909 | ##### |  |
| 31 | 2 IT | 2020-11 | 2 IT-Northeast | 3 | 1 | 1.605277 | ##### |  |
| 32 | 2 IT | 2020-11 | 2 IT-Northeast | 3 | 2 | 2.605263 | ##### |  |
| 33 | 2 IT | 2020-11 | 2 IT-Northeast | 3 | 3 | 1.69697  | ##### |  |
| 34 | 2 IT | 2020-11 | 2 IT-Northeast | 3 | 4 | 1.428571 | ##### |  |
| 35 | 2 IT | 2020-11 | 2 IT-Northeast | 3 | 5 | 1        | ##### |  |
| 36 | 2 IT | 2020-11 | 2 IT-Northeast | 3 | 5 | 1        | ##### |  |
| 37 | 2 IT | 2020-11 | 2 IT-Northwest | 1 | 1 | 1.557702 | ##### |  |
| 38 | 2 IT | 2020-11 | 2 IT-Northwest | 1 | 2 | 2.390695 | ##### |  |
| 39 | 2 IT | 2020-11 | 2 IT-Northwest | 1 | 3 | 1.585176 | ##### |  |
| 40 | 2 IT | 2020-11 | 2 IT-Northwest | 1 | 4 | 1.566186 | ##### |  |
| 41 | 2 IT | 2020-11 | 2 IT-Northwest | 1 | 5 | #####    | ##### |  |
| 42 | 2 IT | 2020-11 | 2 IT-Northwest | 2 | 1 | 1.434104 | ##### |  |
| 43 | 2 IT | 2020-11 | 2 IT-Northwest | 2 | 2 | 2.235294 | ##### |  |
| 44 | 2 IT | 2020-11 | 2 IT-Northwest | 2 | 3 | 1.620968 | ##### |  |
| 45 | 2 IT | 2020-11 | 2 IT-Northwest | 2 | 4 | 1.634409 | ##### |  |
| 46 | 2 IT | 2020-11 | 2 IT-Northwest | 2 | 5 | #####    | ##### |  |
| 47 | 2 IT | 2020-11 | 2 IT-Northwest | 3 | 1 | 1.651106 | ##### |  |
| 48 | 2 IT | 2020-11 | 2 IT-Northwest | 3 | 2 | 2.5      | ##### |  |
| 49 | 2 IT | 2020-11 | 2 IT-Northwest | 3 | 3 | 1.567308 | ##### |  |
| 50 | 2 IT | 2020-11 | 2 IT-Northwest | 3 | 4 | 1.518519 | ##### |  |
| 51 | 2 IT | 2020-11 | 2 IT-Northwest | 3 | 5 | 1.290323 | ##### |  |
| 52 | 2 IT | 2020-11 | 2 IT-Overall   | 1 | 1 | 1.733301 | ##### |  |
| 53 | 2 IT | 2020-11 | 2 IT-Overall   | 1 | 2 | 2.458643 | ##### |  |
| 54 | 2 IT | 2020-11 | 2 IT-Overall   | 1 | 3 | 1.786515 | ##### |  |
| 55 | 2 IT | 2020-11 | 2 IT-Overall   | 1 | 4 | 1.701573 | ##### |  |
| 56 | 2 IT | 2020-11 | 2 IT-Overall   | 1 | 5 | 1.222065 | ##### |  |
| 57 | 2 IT | 2020-11 | 2 IT-Overall   | 2 | 1 | 1.642393 | ##### |  |
| 58 | 2 IT | 2020-11 | 2 IT-Overall   | 2 | 2 | 2.332855 | ##### |  |
| 59 | 2 IT | 2020-11 | 2 IT-Overall   | 2 | 3 | 1.791678 | ##### |  |
| 60 | 2 IT | 2020-11 | 2 IT-Overall   | 2 | 3 | 1.791678 | ##### |  |

1  
2  
3  
4  
5  
6  
7  
8  
9  
10  
11  
12  
13  
14  
15  
16  
17  
18  
19  
20  
21  
22  
23  
24  
25  
26  
27  
28  
29  
30  
31  
32  
33  
34  
35  
36  
37  
38  
39  
40  
41  
42  
43  
44  
45  
46  
47  
48  
49  
50  
51  
52  
53  
54  
55  
56  
57  
58  
59  
60

|      |         |                |   |   |          |       |
|------|---------|----------------|---|---|----------|-------|
| 2 IT | 2020-11 | 2 IT-Overall   | 2 | 4 | 1.767879 | ##### |
| 2 IT | 2020-11 | 2 IT-Overall   | 2 | 5 | 1.006086 | ##### |
| 2 IT | 2020-11 | 2 IT-Overall   | 3 | 1 | 1.796132 | ##### |
| 2 IT | 2020-11 | 2 IT-Overall   | 3 | 2 | 2.537139 | ##### |
| 2 IT | 2020-11 | 2 IT-Overall   | 3 | 3 | 1.783421 | ##### |
| 2 IT | 2020-11 | 2 IT-Overall   | 3 | 4 | 1.66002  | ##### |
| 2 IT | 2020-11 | 2 IT-Overall   | 3 | 5 | 1.43978  | ##### |
| 2 IT | 2020-11 | 2 IT-South     | 1 | 1 | 1.84272  | ##### |
| 2 IT | 2020-11 | 2 IT-South     | 1 | 2 | 2.484848 | ##### |
| 2 IT | 2020-11 | 2 IT-South     | 1 | 3 | 1.977729 | ##### |
| 2 IT | 2020-11 | 2 IT-South     | 1 | 4 | 1.614554 | ##### |
| 2 IT | 2020-11 | 2 IT-South     | 1 | 5 | 1.531424 | ##### |
| 2 IT | 2020-11 | 2 IT-South     | 2 | 1 | 1.893285 | ##### |
| 2 IT | 2020-11 | 2 IT-South     | 2 | 2 | 2.484848 | ##### |
| 2 IT | 2020-11 | 2 IT-South     | 2 | 3 | 2.015625 | ##### |
| 2 IT | 2020-11 | 2 IT-South     | 2 | 4 | 2.0625   | ##### |
| 2 IT | 2020-11 | 2 IT-South     | 2 | 5 | 1.166667 | ##### |
| 2 IT | 2020-11 | 2 IT-South     | 3 | 1 | 1.813656 | ##### |
| 2 IT | 2020-11 | 2 IT-South     | 3 | 2 | 2.484848 | ##### |
| 2 IT | 2020-11 | 2 IT-South     | 3 | 3 | 1.956522 | ##### |
| 2 IT | 2020-11 | 2 IT-South     | 3 | 4 | 1.378378 | ##### |
| 2 IT | 2020-11 | 2 IT-South     | 3 | 5 | 1.823529 | ##### |
| 2 IT | 2020-11 | 3 IT-Central   | 1 | 1 | 0        | 0     |
| 2 IT | 2020-11 | 3 IT-Central   | 1 | 2 | 0        | 0     |
| 2 IT | 2020-11 | 3 IT-Central   | 1 | 3 | 0        | 0     |
| 2 IT | 2020-11 | 3 IT-Central   | 1 | 4 | 0        | 0     |
| 2 IT | 2020-11 | 3 IT-Central   | 1 | 5 | 0        | 0     |
| 2 IT | 2020-11 | 3 IT-Central   | 2 | 1 | 0        | 0     |
| 2 IT | 2020-11 | 3 IT-Central   | 2 | 2 | 0        | 0     |
| 2 IT | 2020-11 | 3 IT-Central   | 2 | 3 | 0        | 0     |
| 2 IT | 2020-11 | 3 IT-Central   | 2 | 4 | 0        | 0     |
| 2 IT | 2020-11 | 3 IT-Central   | 2 | 5 | 0        | 0     |
| 2 IT | 2020-11 | 3 IT-Central   | 3 | 1 | 0        | 0     |
| 2 IT | 2020-11 | 3 IT-Central   | 3 | 2 | 0        | 0     |
| 2 IT | 2020-11 | 3 IT-Central   | 3 | 3 | 0        | 0     |
| 2 IT | 2020-11 | 3 IT-Central   | 3 | 4 | 0        | 0     |
| 2 IT | 2020-11 | 3 IT-Central   | 3 | 5 | 0        | 0     |
| 2 IT | 2020-11 | 3 IT-Insular   | 1 | 1 | 0        | 0     |
| 2 IT | 2020-11 | 3 IT-Insular   | 1 | 2 | 0        | 0     |
| 2 IT | 2020-11 | 3 IT-Insular   | 1 | 3 | 0        | 0     |
| 2 IT | 2020-11 | 3 IT-Insular   | 1 | 4 | 0        | 0     |
| 2 IT | 2020-11 | 3 IT-Insular   | 1 | 5 | 0        | 0     |
| 2 IT | 2020-11 | 3 IT-Insular   | 2 | 1 | 0        | 0     |
| 2 IT | 2020-11 | 3 IT-Insular   | 2 | 2 | 0        | 0     |
| 2 IT | 2020-11 | 3 IT-Insular   | 2 | 3 | 0        | 0     |
| 2 IT | 2020-11 | 3 IT-Insular   | 2 | 4 | 0        | 0     |
| 2 IT | 2020-11 | 3 IT-Insular   | 2 | 5 | 0        | 0     |
| 2 IT | 2020-11 | 3 IT-Insular   | 3 | 1 | 0        | 0     |
| 2 IT | 2020-11 | 3 IT-Insular   | 3 | 2 | 0        | 0     |
| 2 IT | 2020-11 | 3 IT-Insular   | 3 | 3 | 0        | 0     |
| 2 IT | 2020-11 | 3 IT-Insular   | 3 | 4 | 0        | 0     |
| 2 IT | 2020-11 | 3 IT-Insular   | 3 | 5 | 0        | 0     |
| 2 IT | 2020-11 | 3 IT-Northeast | 1 | 1 | 0        | 0     |
| 2 IT | 2020-11 | 3 IT-Northeast | 1 | 2 | 0        | 0     |
| 2 IT | 2020-11 | 3 IT-Northeast | 1 | 3 | 0        | 0     |
| 2 IT | 2020-11 | 3 IT-Northeast | 1 | 4 | 0        | 0     |

|    |      |         |                |   |   |   |   |
|----|------|---------|----------------|---|---|---|---|
| 1  |      |         |                |   |   |   |   |
| 2  |      |         |                |   |   |   |   |
| 3  | 2 IT | 2020-11 | 3 IT-Northeast | 1 | 5 | 0 | 0 |
| 4  | 2 IT | 2020-11 | 3 IT-Northeast | 2 | 1 | 0 | 0 |
| 5  | 2 IT | 2020-11 | 3 IT-Northeast | 2 | 2 | 0 | 0 |
| 6  | 2 IT | 2020-11 | 3 IT-Northeast | 2 | 3 | 0 | 0 |
| 7  | 2 IT | 2020-11 | 3 IT-Northeast | 2 | 4 | 0 | 0 |
| 8  | 2 IT | 2020-11 | 3 IT-Northeast | 2 | 5 | 0 | 0 |
| 9  | 2 IT | 2020-11 | 3 IT-Northeast | 3 | 1 | 0 | 0 |
| 10 | 2 IT | 2020-11 | 3 IT-Northeast | 3 | 2 | 0 | 0 |
| 11 | 2 IT | 2020-11 | 3 IT-Northeast | 3 | 3 | 0 | 0 |
| 12 | 2 IT | 2020-11 | 3 IT-Northeast | 3 | 4 | 0 | 0 |
| 13 | 2 IT | 2020-11 | 3 IT-Northeast | 3 | 5 | 0 | 0 |
| 14 | 2 IT | 2020-11 | 3 IT-Northwest | 1 | 1 | 0 | 0 |
| 15 | 2 IT | 2020-11 | 3 IT-Northwest | 1 | 2 | 0 | 0 |
| 16 | 2 IT | 2020-11 | 3 IT-Northwest | 1 | 3 | 0 | 0 |
| 17 | 2 IT | 2020-11 | 3 IT-Northwest | 1 | 4 | 0 | 0 |
| 18 | 2 IT | 2020-11 | 3 IT-Northwest | 1 | 5 | 0 | 0 |
| 19 | 2 IT | 2020-11 | 3 IT-Northwest | 2 | 1 | 0 | 0 |
| 20 | 2 IT | 2020-11 | 3 IT-Northwest | 2 | 2 | 0 | 0 |
| 21 | 2 IT | 2020-11 | 3 IT-Northwest | 2 | 3 | 0 | 0 |
| 22 | 2 IT | 2020-11 | 3 IT-Northwest | 2 | 4 | 0 | 0 |
| 23 | 2 IT | 2020-11 | 3 IT-Northwest | 2 | 5 | 0 | 0 |
| 24 | 2 IT | 2020-11 | 3 IT-Northwest | 2 | 5 | 0 | 0 |
| 25 | 2 IT | 2020-11 | 3 IT-Northwest | 3 | 1 | 0 | 0 |
| 26 | 2 IT | 2020-11 | 3 IT-Northwest | 3 | 2 | 0 | 0 |
| 27 | 2 IT | 2020-11 | 3 IT-Northwest | 3 | 3 | 0 | 0 |
| 28 | 2 IT | 2020-11 | 3 IT-Northwest | 3 | 4 | 0 | 0 |
| 29 | 2 IT | 2020-11 | 3 IT-Northwest | 3 | 5 | 0 | 0 |
| 30 | 2 IT | 2020-11 | 3 IT-Overall   | 1 | 1 | 0 | 0 |
| 31 | 2 IT | 2020-11 | 3 IT-Overall   | 1 | 2 | 0 | 0 |
| 32 | 2 IT | 2020-11 | 3 IT-Overall   | 1 | 3 | 0 | 0 |
| 33 | 2 IT | 2020-11 | 3 IT-Overall   | 1 | 4 | 0 | 0 |
| 34 | 2 IT | 2020-11 | 3 IT-Overall   | 1 | 5 | 0 | 0 |
| 35 | 2 IT | 2020-11 | 3 IT-Overall   | 2 | 1 | 0 | 0 |
| 36 | 2 IT | 2020-11 | 3 IT-Overall   | 2 | 2 | 0 | 0 |
| 37 | 2 IT | 2020-11 | 3 IT-Overall   | 2 | 3 | 0 | 0 |
| 38 | 2 IT | 2020-11 | 3 IT-Overall   | 2 | 4 | 0 | 0 |
| 39 | 2 IT | 2020-11 | 3 IT-Overall   | 2 | 5 | 0 | 0 |
| 40 | 2 IT | 2020-11 | 3 IT-Overall   | 3 | 1 | 0 | 0 |
| 41 | 2 IT | 2020-11 | 3 IT-Overall   | 3 | 2 | 0 | 0 |
| 42 | 2 IT | 2020-11 | 3 IT-Overall   | 3 | 3 | 0 | 0 |
| 43 | 2 IT | 2020-11 | 3 IT-Overall   | 3 | 4 | 0 | 0 |
| 44 | 2 IT | 2020-11 | 3 IT-Overall   | 3 | 5 | 0 | 0 |
| 45 | 2 IT | 2020-11 | 3 IT-South     | 1 | 1 | 0 | 0 |
| 46 | 2 IT | 2020-11 | 3 IT-South     | 1 | 2 | 0 | 0 |
| 47 | 2 IT | 2020-11 | 3 IT-South     | 1 | 3 | 0 | 0 |
| 48 | 2 IT | 2020-11 | 3 IT-South     | 1 | 4 | 0 | 0 |
| 49 | 2 IT | 2020-11 | 3 IT-South     | 1 | 5 | 0 | 0 |
| 50 | 2 IT | 2020-11 | 3 IT-South     | 2 | 1 | 0 | 0 |
| 51 | 2 IT | 2020-11 | 3 IT-South     | 2 | 2 | 0 | 0 |
| 52 | 2 IT | 2020-11 | 3 IT-South     | 2 | 3 | 0 | 0 |
| 53 | 2 IT | 2020-11 | 3 IT-South     | 2 | 4 | 0 | 0 |
| 54 | 2 IT | 2020-11 | 3 IT-South     | 2 | 5 | 0 | 0 |
| 55 | 2 IT | 2020-11 | 3 IT-South     | 3 | 1 | 0 | 0 |
| 56 | 2 IT | 2020-11 | 3 IT-South     | 3 | 2 | 0 | 0 |
| 57 | 2 IT | 2020-11 | 3 IT-South     | 3 | 3 | 0 | 0 |
| 58 | 2 IT | 2020-11 | 3 IT-South     | 3 | 4 | 0 | 0 |
| 59 | 2 IT | 2020-11 | 3 IT-South     | 3 | 5 | 0 | 0 |
| 60 | 2 IT | 2020-11 | 3 IT-South     | 3 | 5 | 0 | 0 |

1  
2  
3  
4  
5  
6  
7  
8  
9  
10  
11  
12  
13  
14  
15  
16  
17  
18  
19  
20  
21  
22  
23  
24  
25  
26  
27  
28  
29  
30  
31  
32  
33  
34  
35  
36  
37  
38  
39  
40  
41  
42  
43  
44  
45  
46  
47  
48  
49  
50  
51  
52  
53  
54  
55  
56  
57  
58  
59  
60

|   |    |         |                |   |   |          |       |
|---|----|---------|----------------|---|---|----------|-------|
| 2 | IT | 2020-11 | 4 IT-Central   | 1 | 1 | 1.284747 | ##### |
| 2 | IT | 2020-11 | 4 IT-Central   | 1 | 2 | #####    | ##### |
| 2 | IT | 2020-11 | 4 IT-Central   | 1 | 3 | 1.867348 | ##### |
| 2 | IT | 2020-11 | 4 IT-Central   | 1 | 4 | 1.633731 | ##### |
| 2 | IT | 2020-11 | 4 IT-Central   | 1 | 5 | #####    | ##### |
| 2 | IT | 2020-11 | 4 IT-Central   | 2 | 1 | #####    | ##### |
| 2 | IT | 2020-11 | 4 IT-Central   | 2 | 2 | #####    | ##### |
| 2 | IT | 2020-11 | 4 IT-Central   | 2 | 3 | 1.044643 | ##### |
| 2 | IT | 2020-11 | 4 IT-Central   | 2 | 4 | 1.052632 | ##### |
| 2 | IT | 2020-11 | 4 IT-Central   | 2 | 5 | #####    | ##### |
| 2 | IT | 2020-11 | 4 IT-Central   | 3 | 1 | 1.625218 | ##### |
| 2 | IT | 2020-11 | 4 IT-Central   | 3 | 2 | #####    | ##### |
| 2 | IT | 2020-11 | 4 IT-Central   | 3 | 3 | 2.371795 | ##### |
| 2 | IT | 2020-11 | 4 IT-Central   | 3 | 4 | 2.014493 | ##### |
| 2 | IT | 2020-11 | 4 IT-Central   | 3 | 5 | #####    | ##### |
| 2 | IT | 2020-11 | 4 IT-Insular   | 1 | 1 | #####    | ##### |
| 2 | IT | 2020-11 | 4 IT-Insular   | 1 | 2 | #####    | ##### |
| 2 | IT | 2020-11 | 4 IT-Insular   | 1 | 3 | #####    | ##### |
| 2 | IT | 2020-11 | 4 IT-Insular   | 1 | 4 | 1.600279 | ##### |
| 2 | IT | 2020-11 | 4 IT-Insular   | 1 | 5 | #####    | ##### |
| 2 | IT | 2020-11 | 4 IT-Insular   | 2 | 1 | #####    | ##### |
| 2 | IT | 2020-11 | 4 IT-Insular   | 2 | 2 | #####    | ##### |
| 2 | IT | 2020-11 | 4 IT-Insular   | 2 | 3 | #####    | ##### |
| 2 | IT | 2020-11 | 4 IT-Insular   | 2 | 4 | 2.02     | ##### |
| 2 | IT | 2020-11 | 4 IT-Insular   | 2 | 5 | 0        | 0     |
| 2 | IT | 2020-11 | 4 IT-Insular   | 3 | 1 | #####    | ##### |
| 2 | IT | 2020-11 | 4 IT-Insular   | 3 | 2 | 1.066667 | ##### |
| 2 | IT | 2020-11 | 4 IT-Insular   | 3 | 3 | 1.372093 | ##### |
| 2 | IT | 2020-11 | 4 IT-Insular   | 3 | 4 | 1.290323 | ##### |
| 2 | IT | 2020-11 | 4 IT-Insular   | 3 | 5 | #####    | ##### |
| 2 | IT | 2020-11 | 4 IT-Northeast | 1 | 1 | 1.645036 | ##### |
| 2 | IT | 2020-11 | 4 IT-Northeast | 1 | 2 | 1.079522 | ##### |
| 2 | IT | 2020-11 | 4 IT-Northeast | 1 | 3 | 2.632368 | ##### |
| 2 | IT | 2020-11 | 4 IT-Northeast | 1 | 4 | 2.20673  | ##### |
| 2 | IT | 2020-11 | 4 IT-Northeast | 1 | 5 | 0        | 0     |
| 2 | IT | 2020-11 | 4 IT-Northeast | 2 | 1 | 1.028256 | ##### |
| 2 | IT | 2020-11 | 4 IT-Northeast | 2 | 2 | 1.294118 | ##### |
| 2 | IT | 2020-11 | 4 IT-Northeast | 2 | 3 | 1.299145 | ##### |
| 2 | IT | 2020-11 | 4 IT-Northeast | 2 | 4 | 1.692308 | ##### |
| 2 | IT | 2020-11 | 4 IT-Northeast | 2 | 5 | 0        | 0     |
| 2 | IT | 2020-11 | 4 IT-Northeast | 3 | 1 | 2.095206 | ##### |
| 2 | IT | 2020-11 | 4 IT-Northeast | 3 | 2 | #####    | ##### |
| 2 | IT | 2020-11 | 4 IT-Northeast | 3 | 3 | 3.536842 | ##### |
| 2 | IT | 2020-11 | 4 IT-Northeast | 3 | 4 | 2.5      | ##### |
| 2 | IT | 2020-11 | 4 IT-Northeast | 3 | 5 | 0        | 0     |
| 2 | IT | 2020-11 | 4 IT-Northwest | 1 | 1 | 1.459486 | ##### |
| 2 | IT | 2020-11 | 4 IT-Northwest | 1 | 2 | #####    | ##### |
| 2 | IT | 2020-11 | 4 IT-Northwest | 1 | 3 | 2.429272 | ##### |
| 2 | IT | 2020-11 | 4 IT-Northwest | 1 | 4 | 2.093167 | ##### |
| 2 | IT | 2020-11 | 4 IT-Northwest | 1 | 5 | #####    | ##### |
| 2 | IT | 2020-11 | 4 IT-Northwest | 2 | 1 | 1.044512 | ##### |
| 2 | IT | 2020-11 | 4 IT-Northwest | 2 | 2 | #####    | ##### |
| 2 | IT | 2020-11 | 4 IT-Northwest | 2 | 3 | 1.68     | ##### |
| 2 | IT | 2020-11 | 4 IT-Northwest | 2 | 4 | 1.814433 | ##### |
| 2 | IT | 2020-11 | 4 IT-Northwest | 2 | 5 | #####    | ##### |
| 2 | IT | 2020-11 | 4 IT-Northwest | 3 | 1 | 1.778377 | ##### |

|    |      |         |              |   |   |          |       |  |
|----|------|---------|--------------|---|---|----------|-------|--|
| 1  |      |         |              |   |   |          |       |  |
| 2  |      |         |              |   |   |          |       |  |
| 3  | 2 IT | 2020-11 | 4 IT-Northwe | 3 | 2 | 0.5      | ##### |  |
| 4  | 2 IT | 2020-11 | 4 IT-Northwe | 3 | 3 | 2.813725 | ##### |  |
| 5  | 2 IT | 2020-11 | 4 IT-Northwe | 3 | 4 | 2.296296 | ##### |  |
| 6  | 2 IT | 2020-11 | 4 IT-Northwe | 3 | 5 | #####    | ##### |  |
| 7  | 2 IT | 2020-11 | 4 IT-Overall | 1 | 1 | 1.169193 | ##### |  |
| 8  | 2 IT | 2020-11 | 4 IT-Overall | 1 | 2 | #####    | ##### |  |
| 9  | 2 IT | 2020-11 | 4 IT-Overall | 1 | 3 | 1.864018 | ##### |  |
| 10 | 2 IT | 2020-11 | 4 IT-Overall | 1 | 4 | 1.535543 | ##### |  |
| 11 | 2 IT | 2020-11 | 4 IT-Overall | 1 | 5 | #####    | ##### |  |
| 12 | 2 IT | 2020-11 | 4 IT-Overall | 2 | 1 | #####    | ##### |  |
| 13 | 2 IT | 2020-11 | 4 IT-Overall | 2 | 2 | #####    | ##### |  |
| 14 | 2 IT | 2020-11 | 4 IT-Overall | 2 | 3 | 1.05063  | ##### |  |
| 15 | 2 IT | 2020-11 | 4 IT-Overall | 2 | 4 | 1.440801 | ##### |  |
| 16 | 2 IT | 2020-11 | 4 IT-Overall | 2 | 5 | #####    | ##### |  |
| 17 | 2 IT | 2020-11 | 4 IT-Overall | 3 | 1 | 1.388851 | ##### |  |
| 18 | 2 IT | 2020-11 | 4 IT-Overall | 3 | 2 | #####    | ##### |  |
| 19 | 2 IT | 2020-11 | 4 IT-Overall | 3 | 3 | 2.348076 | ##### |  |
| 20 | 2 IT | 2020-11 | 4 IT-Overall | 3 | 4 | 1.594421 | ##### |  |
| 21 | 2 IT | 2020-11 | 4 IT-Overall | 3 | 5 | #####    | ##### |  |
| 22 | 2 IT | 2020-11 | 4 IT-South   | 1 | 1 | #####    | ##### |  |
| 23 | 2 IT | 2020-11 | 4 IT-South   | 1 | 2 | #####    | ##### |  |
| 24 | 2 IT | 2020-11 | 4 IT-South   | 1 | 3 | 1.456186 | ##### |  |
| 25 | 2 IT | 2020-11 | 4 IT-South   | 1 | 4 | #####    | ##### |  |
| 26 | 2 IT | 2020-11 | 4 IT-South   | 1 | 5 | #####    | ##### |  |
| 27 | 2 IT | 2020-11 | 4 IT-South   | 2 | 1 | #####    | ##### |  |
| 28 | 2 IT | 2020-11 | 4 IT-South   | 2 | 2 | 0.625    | ##### |  |
| 29 | 2 IT | 2020-11 | 4 IT-South   | 2 | 3 | 0.890625 | ##### |  |
| 30 | 2 IT | 2020-11 | 4 IT-South   | 2 | 4 | 0.9      | ##### |  |
| 31 | 2 IT | 2020-11 | 4 IT-South   | 2 | 5 | 0        | 0     |  |
| 32 | 2 IT | 2020-11 | 4 IT-South   | 3 | 1 | #####    | ##### |  |
| 33 | 2 IT | 2020-11 | 4 IT-South   | 3 | 2 | #####    | ##### |  |
| 34 | 2 IT | 2020-11 | 4 IT-South   | 3 | 3 | 1.765957 | ##### |  |
| 35 | 2 IT | 2020-11 | 4 IT-South   | 3 | 4 | 0.575    | ##### |  |
| 36 | 2 IT | 2020-11 | 4 IT-South   | 3 | 5 | #####    | ##### |  |
| 37 | 2 IT | 2020-11 | 5 IT-Central | 1 | 1 | #####    | ##### |  |
| 38 | 2 IT | 2020-11 | 5 IT-Central | 1 | 2 | #####    | ##### |  |
| 39 | 2 IT | 2020-11 | 5 IT-Central | 1 | 3 | #####    | ##### |  |
| 40 | 2 IT | 2020-11 | 5 IT-Central | 1 | 4 | #####    | ##### |  |
| 41 | 2 IT | 2020-11 | 5 IT-Central | 1 | 5 | #####    | ##### |  |
| 42 | 2 IT | 2020-11 | 5 IT-Central | 2 | 1 | #####    | ##### |  |
| 43 | 2 IT | 2020-11 | 5 IT-Central | 2 | 2 | 0.3      | ##### |  |
| 44 | 2 IT | 2020-11 | 5 IT-Central | 2 | 3 | #####    | ##### |  |
| 45 | 2 IT | 2020-11 | 5 IT-Central | 2 | 4 | #####    | ##### |  |
| 46 | 2 IT | 2020-11 | 5 IT-Central | 2 | 5 | #####    | ##### |  |
| 47 | 2 IT | 2020-11 | 5 IT-Central | 3 | 1 | #####    | ##### |  |
| 48 | 2 IT | 2020-11 | 5 IT-Central | 3 | 2 | #####    | ##### |  |
| 49 | 2 IT | 2020-11 | 5 IT-Central | 3 | 3 | #####    | ##### |  |
| 50 | 2 IT | 2020-11 | 5 IT-Central | 3 | 4 | #####    | ##### |  |
| 51 | 2 IT | 2020-11 | 5 IT-Central | 3 | 5 | #####    | ##### |  |
| 52 | 2 IT | 2020-11 | 5 IT-Insular | 1 | 1 | #####    | ##### |  |
| 53 | 2 IT | 2020-11 | 5 IT-Insular | 1 | 2 | #####    | ##### |  |
| 54 | 2 IT | 2020-11 | 5 IT-Insular | 1 | 3 | #####    | ##### |  |
| 55 | 2 IT | 2020-11 | 5 IT-Insular | 1 | 4 | #####    | ##### |  |
| 56 | 2 IT | 2020-11 | 5 IT-Insular | 1 | 5 | #####    | ##### |  |
| 57 | 2 IT | 2020-11 | 5 IT-Insular | 2 | 1 | #####    | ##### |  |
| 58 | 2 IT | 2020-11 | 5 IT-Insular | 2 | 2 | #####    | ##### |  |
| 59 | 2 IT | 2020-11 | 5 IT-Insular | 2 | 3 | #####    | ##### |  |
| 60 | 2 IT | 2020-11 | 5 IT-Insular | 2 | 4 | #####    | ##### |  |

1  
2  
3  
4  
5  
6  
7  
8  
9  
10  
11  
12  
13  
14  
15  
16  
17  
18  
19  
20  
21  
22  
23  
24  
25  
26  
27  
28  
29  
30  
31  
32  
33  
34  
35  
36  
37  
38  
39  
40  
41  
42  
43  
44  
45  
46  
47  
48  
49  
50  
51  
52  
53  
54  
55  
56  
57  
58  
59  
60

|   |    |         |                |   |   |          |          |
|---|----|---------|----------------|---|---|----------|----------|
| 2 | IT | 2020-11 | 5 IT-Insular   | 2 | 3 | #####    | #####    |
| 2 | IT | 2020-11 | 5 IT-Insular   | 2 | 4 | 0.74     | #####    |
| 2 | IT | 2020-11 | 5 IT-Insular   | 2 | 5 | #####    | #####    |
| 2 | IT | 2020-11 | 5 IT-Insular   | 3 | 1 | #####    | #####    |
| 2 | IT | 2020-11 | 5 IT-Insular   | 3 | 2 | #####    | #####    |
| 2 | IT | 2020-11 | 5 IT-Insular   | 3 | 3 | #####    | #####    |
| 2 | IT | 2020-11 | 5 IT-Insular   | 3 | 4 | 1.16129  | #####    |
| 2 | IT | 2020-11 | 5 IT-Insular   | 3 | 5 | 1.181818 | #####    |
| 2 | IT | 2020-11 | 5 IT-Northeast | 1 | 1 | #####    | #####    |
| 2 | IT | 2020-11 | 5 IT-Northeast | 1 | 2 | #####    | #####    |
| 2 | IT | 2020-11 | 5 IT-Northeast | 1 | 3 | #####    | #####    |
| 2 | IT | 2020-11 | 5 IT-Northeast | 1 | 4 | #####    | #####    |
| 2 | IT | 2020-11 | 5 IT-Northeast | 1 | 5 | #####    | #####    |
| 2 | IT | 2020-11 | 5 IT-Northeast | 2 | 1 | #####    | #####    |
| 2 | IT | 2020-11 | 5 IT-Northeast | 2 | 2 | #####    | #####    |
| 2 | IT | 2020-11 | 5 IT-Northeast | 2 | 3 | #####    | #####    |
| 2 | IT | 2020-11 | 5 IT-Northeast | 2 | 4 | #####    | #####    |
| 2 | IT | 2020-11 | 5 IT-Northeast | 2 | 5 | 0.65625  | #####    |
| 2 | IT | 2020-11 | 5 IT-Northeast | 3 | 1 | #####    | #####    |
| 2 | IT | 2020-11 | 5 IT-Northeast | 3 | 2 | #####    | #####    |
| 2 | IT | 2020-11 | 5 IT-Northeast | 3 | 3 | #####    | #####    |
| 2 | IT | 2020-11 | 5 IT-Northeast | 3 | 4 | #####    | #####    |
| 2 | IT | 2020-11 | 5 IT-Northeast | 3 | 5 | 1.259259 | #####    |
| 2 | IT | 2020-11 | 5 IT-Northwest | 1 | 1 | #####    | #####    |
| 2 | IT | 2020-11 | 5 IT-Northwest | 1 | 2 | #####    | #####    |
| 2 | IT | 2020-11 | 5 IT-Northwest | 1 | 3 | #####    | #####    |
| 2 | IT | 2020-11 | 5 IT-Northwest | 1 | 4 | #####    | #####    |
| 2 | IT | 2020-11 | 5 IT-Northwest | 1 | 5 | #####    | #####    |
| 2 | IT | 2020-11 | 5 IT-Northwest | 2 | 1 | #####    | #####    |
| 2 | IT | 2020-11 | 5 IT-Northwest | 2 | 2 | #####    | #####    |
| 2 | IT | 2020-11 | 5 IT-Northwest | 2 | 3 | #####    | #####    |
| 2 | IT | 2020-11 | 5 IT-Northwest | 2 | 4 | #####    | #####    |
| 2 | IT | 2020-11 | 5 IT-Northwest | 2 | 5 | #####    | #####    |
| 2 | IT | 2020-11 | 5 IT-Northwest | 3 | 1 | #####    | #####    |
| 2 | IT | 2020-11 | 5 IT-Northwest | 3 | 2 | #####    | #####    |
| 2 | IT | 2020-11 | 5 IT-Northwest | 3 | 3 | 0.72     | #####    |
| 2 | IT | 2020-11 | 5 IT-Northwest | 3 | 4 | #####    | #####    |
| 2 | IT | 2020-11 | 5 IT-Northwest | 3 | 5 | 1.266667 | #####    |
| 2 | IT | 2020-11 | 5 IT-Overall   | 1 | 1 | #####    | #####    |
| 2 | IT | 2020-11 | 5 IT-Overall   | 1 | 2 | #####    | #####    |
| 2 | IT | 2020-11 | 5 IT-Overall   | 1 | 3 | #####    | #####    |
| 2 | IT | 2020-11 | 5 IT-Overall   | 1 | 4 | #####    | #####    |
| 2 | IT | 2020-11 | 5 IT-Overall   | 1 | 5 | #####    | #####    |
| 2 | IT | 2020-11 | 5 IT-Overall   | 2 | 1 | #####    | #####    |
| 2 | IT | 2020-11 | 5 IT-Overall   | 2 | 2 | #####    | #####    |
| 2 | IT | 2020-11 | 5 IT-Overall   | 2 | 3 | #####    | #####    |
| 2 | IT | 2020-11 | 5 IT-Overall   | 2 | 4 | #####    | #####    |
| 2 | IT | 2020-11 | 5 IT-Overall   | 2 | 5 | #####    | 0.095522 |
| 2 | IT | 2020-11 | 5 IT-Overall   | 3 | 1 | #####    | #####    |
| 2 | IT | 2020-11 | 5 IT-Overall   | 3 | 2 | #####    | #####    |
| 2 | IT | 2020-11 | 5 IT-Overall   | 3 | 3 | #####    | #####    |
| 2 | IT | 2020-11 | 5 IT-Overall   | 3 | 4 | #####    | #####    |
| 2 | IT | 2020-11 | 5 IT-Overall   | 3 | 5 | 1.105135 | #####    |
| 2 | IT | 2020-11 | 5 IT-South     | 1 | 1 | #####    | #####    |
| 2 | IT | 2020-11 | 5 IT-South     | 1 | 2 | #####    | #####    |
| 2 | IT | 2020-11 | 5 IT-South     | 1 | 3 | #####    | #####    |

|    |      |         |                |   |   |          |          |
|----|------|---------|----------------|---|---|----------|----------|
| 1  |      |         |                |   |   |          |          |
| 2  |      |         |                |   |   |          |          |
| 3  | 2 IT | 2020-11 | 5 IT-South     | 1 | 4 | #####    | #####    |
| 4  | 2 IT | 2020-11 | 5 IT-South     | 1 | 5 | 1.072462 | #####    |
| 5  | 2 IT | 2020-11 | 5 IT-South     | 2 | 1 | #####    | #####    |
| 6  | 2 IT | 2020-11 | 5 IT-South     | 2 | 2 | 0.55     | #####    |
| 7  | 2 IT | 2020-11 | 5 IT-South     | 2 | 3 | #####    | #####    |
| 8  | 2 IT | 2020-11 | 5 IT-South     | 2 | 4 | #####    | #####    |
| 9  | 2 IT | 2020-11 | 5 IT-South     | 2 | 5 | #####    | #####    |
| 10 | 2 IT | 2020-11 | 5 IT-South     | 3 | 1 | 1.068184 | #####    |
| 11 | 2 IT | 2020-11 | 5 IT-South     | 3 | 2 | #####    | #####    |
| 12 | 2 IT | 2020-11 | 5 IT-South     | 3 | 3 | 1.043478 | #####    |
| 13 | 2 IT | 2020-11 | 5 IT-South     | 3 | 4 | 1.131579 | #####    |
| 14 | 2 IT | 2020-11 | 5 IT-South     | 3 | 5 | 1.352941 | #####    |
| 15 | 2 IT | 2020-12 | 1 IT-Central   | 1 | 1 | 2.99956  | #####    |
| 16 | 2 IT | 2020-12 | 1 IT-Central   | 1 | 2 | 3.813595 | #####    |
| 17 | 2 IT | 2020-12 | 1 IT-Central   | 1 | 3 | 3.233483 | #####    |
| 18 | 2 IT | 2020-12 | 1 IT-Central   | 1 | 4 | 3.265746 | #####    |
| 19 | 2 IT | 2020-12 | 1 IT-Central   | 1 | 5 | 2.029483 | #####    |
| 20 | 2 IT | 2020-12 | 1 IT-Central   | 2 | 1 | 2.539012 | #####    |
| 21 | 2 IT | 2020-12 | 1 IT-Central   | 2 | 2 | 3.36     | #####    |
| 22 | 2 IT | 2020-12 | 1 IT-Central   | 2 | 3 | 3.132075 | #####    |
| 23 | 2 IT | 2020-12 | 1 IT-Central   | 2 | 4 | 2.935484 | #####    |
| 24 | 2 IT | 2020-12 | 1 IT-Central   | 2 | 5 | 1.235294 | #####    |
| 25 | 2 IT | 2020-12 | 1 IT-Central   | 3 | 1 | 3.319955 | #####    |
| 26 | 2 IT | 2020-12 | 1 IT-Central   | 3 | 2 | 4.052632 | #####    |
| 27 | 2 IT | 2020-12 | 1 IT-Central   | 3 | 3 | 3.30303  | #####    |
| 28 | 2 IT | 2020-12 | 1 IT-Central   | 3 | 4 | 3.5      | #####    |
| 29 | 2 IT | 2020-12 | 1 IT-Central   | 3 | 5 | 2.666667 | #####    |
| 30 | 2 IT | 2020-12 | 1 IT-Insular   | 1 | 1 | 2.781965 | #####    |
| 31 | 2 IT | 2020-12 | 1 IT-Insular   | 1 | 2 | 3.378405 | #####    |
| 32 | 2 IT | 2020-12 | 1 IT-Insular   | 1 | 3 | 3.202352 | #####    |
| 33 | 2 IT | 2020-12 | 1 IT-Insular   | 1 | 4 | 3.563991 | #####    |
| 34 | 2 IT | 2020-12 | 1 IT-Insular   | 1 | 5 | 1.327994 | #####    |
| 35 | 2 IT | 2020-12 | 1 IT-Insular   | 2 | 1 | 2.389672 | #####    |
| 36 | 2 IT | 2020-12 | 1 IT-Insular   | 2 | 2 | 2.852941 | #####    |
| 37 | 2 IT | 2020-12 | 1 IT-Insular   | 2 | 3 | 2.4      | #####    |
| 38 | 2 IT | 2020-12 | 1 IT-Insular   | 2 | 4 | 2.157895 | #####    |
| 39 | 2 IT | 2020-12 | 1 IT-Insular   | 2 | 5 | 2.142857 | #####    |
| 40 | 2 IT | 2020-12 | 1 IT-Insular   | 3 | 1 | 3.078701 | #####    |
| 41 | 2 IT | 2020-12 | 1 IT-Insular   | 3 | 2 | 4.285714 | 1.892258 |
| 42 | 2 IT | 2020-12 | 1 IT-Insular   | 3 | 3 | 3.9375   | #####    |
| 43 | 2 IT | 2020-12 | 1 IT-Insular   | 3 | 4 | 4.583333 | 1.163514 |
| 44 | 2 IT | 2020-12 | 1 IT-Insular   | 3 | 5 | 1        | #####    |
| 45 | 2 IT | 2020-12 | 1 IT-Northeast | 1 | 1 | 2.806877 | #####    |
| 46 | 2 IT | 2020-12 | 1 IT-Northeast | 1 | 2 | 3.964648 | #####    |
| 47 | 2 IT | 2020-12 | 1 IT-Northeast | 1 | 3 | 3.219838 | #####    |
| 48 | 2 IT | 2020-12 | 1 IT-Northeast | 1 | 4 | 2.609962 | #####    |
| 49 | 2 IT | 2020-12 | 1 IT-Northeast | 1 | 5 | 1.968967 | #####    |
| 50 | 2 IT | 2020-12 | 1 IT-Northeast | 2 | 1 | 2.300378 | #####    |
| 51 | 2 IT | 2020-12 | 1 IT-Northeast | 2 | 2 | 2.441176 | #####    |
| 52 | 2 IT | 2020-12 | 1 IT-Northeast | 2 | 3 | 3.183333 | #####    |
| 53 | 2 IT | 2020-12 | 1 IT-Northeast | 2 | 4 | 2.4      | #####    |
| 54 | 2 IT | 2020-12 | 1 IT-Northeast | 2 | 5 | 1.521739 | #####    |
| 55 | 2 IT | 2020-12 | 1 IT-Northeast | 3 | 1 | 3.342569 | #####    |
| 56 | 2 IT | 2020-12 | 1 IT-Northeast | 3 | 2 | 4.772727 | #####    |
| 57 | 2 IT | 2020-12 | 1 IT-Northeast | 3 | 3 | 3.25     | #####    |
| 58 | 2 IT | 2020-12 | 1 IT-Northeast | 3 | 4 | 2.9      | #####    |
| 59 | 2 IT | 2020-12 | 1 IT-Northeast | 3 |   |          |          |
| 60 | 2 IT | 2020-12 | 1 IT-Northeast | 3 |   |          |          |

1  
2  
3  
4  
5  
6  
7  
8  
9  
10  
11  
12  
13  
14  
15  
16  
17  
18  
19  
20  
21  
22  
23  
24  
25  
26  
27  
28  
29  
30  
31  
32  
33  
34  
35  
36  
37  
38  
39  
40  
41  
42  
43  
44  
45  
46  
47  
48  
49  
50  
51  
52  
53  
54  
55  
56  
57  
58  
59  
60

|      |         |                |   |   |          |          |
|------|---------|----------------|---|---|----------|----------|
| 2 IT | 2020-12 | 1 IT-Northeast | 3 | 5 | 2.642857 | #####    |
| 2 IT | 2020-12 | 1 IT-Northwest | 1 | 1 | 2.524965 | #####    |
| 2 IT | 2020-12 | 1 IT-Northwest | 1 | 2 | 2.926174 | #####    |
| 2 IT | 2020-12 | 1 IT-Northwest | 1 | 3 | 3.470975 | #####    |
| 2 IT | 2020-12 | 1 IT-Northwest | 1 | 4 | 2.111063 | #####    |
| 2 IT | 2020-12 | 1 IT-Northwest | 1 | 5 | 1.874999 | #####    |
| 2 IT | 2020-12 | 1 IT-Northwest | 2 | 1 | 2.232052 | #####    |
| 2 IT | 2020-12 | 1 IT-Northwest | 2 | 2 | 2.803922 | #####    |
| 2 IT | 2020-12 | 1 IT-Northwest | 2 | 3 | 2.535714 | #####    |
| 2 IT | 2020-12 | 1 IT-Northwest | 2 | 4 | 2.447368 | #####    |
| 2 IT | 2020-12 | 1 IT-Northwest | 2 | 5 | 1.6      | #####    |
| 2 IT | 2020-12 | 1 IT-Northwest | 3 | 1 | 2.840779 | #####    |
| 2 IT | 2020-12 | 1 IT-Northwest | 3 | 2 | 3.05     | #####    |
| 2 IT | 2020-12 | 1 IT-Northwest | 3 | 3 | 4.15625  | #####    |
| 2 IT | 2020-12 | 1 IT-Northwest | 3 | 4 | 1.625    | #####    |
| 2 IT | 2020-12 | 1 IT-Northwest | 3 | 5 | 2.210526 | #####    |
| 2 IT | 2020-12 | 1 IT-Overall   | 1 | 1 | 2.857414 | #####    |
| 2 IT | 2020-12 | 1 IT-Overall   | 1 | 2 | 3.482688 | #####    |
| 2 IT | 2020-12 | 1 IT-Overall   | 1 | 3 | 3.551999 | #####    |
| 2 IT | 2020-12 | 1 IT-Overall   | 1 | 4 | 2.881091 | #####    |
| 2 IT | 2020-12 | 1 IT-Overall   | 1 | 5 | 1.809511 | #####    |
| 2 IT | 2020-12 | 1 IT-Overall   | 2 | 1 | 2.389838 | #####    |
| 2 IT | 2020-12 | 1 IT-Overall   | 2 | 2 | 2.770855 | #####    |
| 2 IT | 2020-12 | 1 IT-Overall   | 2 | 3 | 3.017575 | #####    |
| 2 IT | 2020-12 | 1 IT-Overall   | 2 | 4 | 2.524332 | #####    |
| 2 IT | 2020-12 | 1 IT-Overall   | 2 | 5 | 1.50103  | #####    |
| 2 IT | 2020-12 | 1 IT-Overall   | 3 | 1 | 3.29965  | #####    |
| 2 IT | 2020-12 | 1 IT-Overall   | 3 | 2 | 4.027289 | #####    |
| 2 IT | 2020-12 | 1 IT-Overall   | 3 | 3 | 3.987364 | #####    |
| 2 IT | 2020-12 | 1 IT-Overall   | 3 | 4 | 3.321919 | #####    |
| 2 IT | 2020-12 | 1 IT-Overall   | 3 | 5 | 2.105612 | #####    |
| 2 IT | 2020-12 | 1 IT-South     | 1 | 1 | 3.049762 | #####    |
| 2 IT | 2020-12 | 1 IT-South     | 1 | 2 | 3.460188 | #####    |
| 2 IT | 2020-12 | 1 IT-South     | 1 | 3 | 4.180238 | #####    |
| 2 IT | 2020-12 | 1 IT-South     | 1 | 4 | 2.841059 | #####    |
| 2 IT | 2020-12 | 1 IT-South     | 1 | 5 | 1.766522 | #####    |
| 2 IT | 2020-12 | 1 IT-South     | 2 | 1 | 2.465719 | #####    |
| 2 IT | 2020-12 | 1 IT-South     | 2 | 2 | 2.5      | #####    |
| 2 IT | 2020-12 | 1 IT-South     | 2 | 3 | 3.395349 | #####    |
| 2 IT | 2020-12 | 1 IT-South     | 2 | 4 | 2.567568 | #####    |
| 2 IT | 2020-12 | 1 IT-South     | 2 | 5 | 1.357143 | #####    |
| 2 IT | 2020-12 | 1 IT-South     | 3 | 1 | 3.705811 | #####    |
| 2 IT | 2020-12 | 1 IT-South     | 3 | 2 | 4.066667 | #####    |
| 2 IT | 2020-12 | 1 IT-South     | 3 | 3 | 4.894737 | 1.286912 |
| 2 IT | 2020-12 | 1 IT-South     | 3 | 4 | 3.428571 | #####    |
| 2 IT | 2020-12 | 1 IT-South     | 3 | 5 | 2.2      | #####    |
| 2 IT | 2020-12 | 2 IT-Central   | 1 | 1 | 1.690631 | #####    |
| 2 IT | 2020-12 | 2 IT-Central   | 1 | 2 | 2.441222 | #####    |
| 2 IT | 2020-12 | 2 IT-Central   | 1 | 3 | 1.715111 | #####    |
| 2 IT | 2020-12 | 2 IT-Central   | 1 | 4 | 1.858486 | #####    |
| 2 IT | 2020-12 | 2 IT-Central   | 1 | 5 | 1.088687 | #####    |
| 2 IT | 2020-12 | 2 IT-Central   | 2 | 1 | 1.56245  | #####    |
| 2 IT | 2020-12 | 2 IT-Central   | 2 | 2 | 2.08     | #####    |
| 2 IT | 2020-12 | 2 IT-Central   | 2 | 3 | 1.62963  | #####    |
| 2 IT | 2020-12 | 2 IT-Central   | 2 | 4 | 2.193548 | #####    |
| 2 IT | 2020-12 | 2 IT-Central   | 2 | 5 | #####    | #####    |



|    |      |         |                |   |   |          |       |  |
|----|------|---------|----------------|---|---|----------|-------|--|
| 1  |      |         |                |   |   |          |       |  |
| 2  |      |         |                |   |   |          |       |  |
| 3  | 2 IT | 2020-12 | 2 IT-Central   | 3 | 1 | 1.779329 | ##### |  |
| 4  | 2 IT | 2020-12 | 2 IT-Central   | 3 | 2 | 2.631579 | ##### |  |
| 5  | 2 IT | 2020-12 | 2 IT-Central   | 3 | 3 | 1.771429 | ##### |  |
| 6  | 2 IT | 2020-12 | 2 IT-Central   | 3 | 4 | 1.62963  | ##### |  |
| 7  | 2 IT | 2020-12 | 2 IT-Central   | 3 | 5 | 1.4      | ##### |  |
| 8  | 2 IT | 2020-12 | 2 IT-Insular   | 1 | 1 | 1.597351 | ##### |  |
| 9  | 2 IT | 2020-12 | 2 IT-Insular   | 1 | 2 | 2.244538 | ##### |  |
| 10 | 2 IT | 2020-12 | 2 IT-Insular   | 1 | 3 | 1.954829 | ##### |  |
| 11 | 2 IT | 2020-12 | 2 IT-Insular   | 1 | 4 | 1.607681 | ##### |  |
| 12 | 2 IT | 2020-12 | 2 IT-Insular   | 1 | 5 | #####    | ##### |  |
| 13 | 2 IT | 2020-12 | 2 IT-Insular   | 2 | 1 | 1.733559 | ##### |  |
| 14 | 2 IT | 2020-12 | 2 IT-Insular   | 2 | 2 | 2.542857 | ##### |  |
| 15 | 2 IT | 2020-12 | 2 IT-Insular   | 2 | 3 | 1.837838 | ##### |  |
| 16 | 2 IT | 2020-12 | 2 IT-Insular   | 2 | 4 | 1.526316 | ##### |  |
| 17 | 2 IT | 2020-12 | 2 IT-Insular   | 2 | 5 | #####    | ##### |  |
| 18 | 2 IT | 2020-12 | 2 IT-Insular   | 3 | 1 | 1.495019 | ##### |  |
| 19 | 2 IT | 2020-12 | 2 IT-Insular   | 3 | 2 | 1.714286 | ##### |  |
| 20 | 2 IT | 2020-12 | 2 IT-Insular   | 3 | 3 | 2.055556 | ##### |  |
| 21 | 2 IT | 2020-12 | 2 IT-Insular   | 3 | 4 | 1.666667 | ##### |  |
| 22 | 2 IT | 2020-12 | 2 IT-Insular   | 3 | 5 | 0.875    | ##### |  |
| 23 | 2 IT | 2020-12 | 2 IT-Northeast | 1 | 1 | 1.428345 | ##### |  |
| 24 | 2 IT | 2020-12 | 2 IT-Northeast | 1 | 2 | 2.453383 | ##### |  |
| 25 | 2 IT | 2020-12 | 2 IT-Northeast | 1 | 3 | 1.405366 | ##### |  |
| 26 | 2 IT | 2020-12 | 2 IT-Northeast | 1 | 4 | 1.266837 | ##### |  |
| 27 | 2 IT | 2020-12 | 2 IT-Northeast | 1 | 5 | 1.028494 | ##### |  |
| 28 | 2 IT | 2020-12 | 2 IT-Northeast | 2 | 1 | 1.318597 | ##### |  |
| 29 | 2 IT | 2020-12 | 2 IT-Northeast | 2 | 2 | 2.083333 | ##### |  |
| 30 | 2 IT | 2020-12 | 2 IT-Northeast | 2 | 3 | 1.523077 | ##### |  |
| 31 | 2 IT | 2020-12 | 2 IT-Northeast | 2 | 4 | 1.217391 | ##### |  |
| 32 | 2 IT | 2020-12 | 2 IT-Northeast | 2 | 5 | 1        | ##### |  |
| 33 | 2 IT | 2020-12 | 2 IT-Northeast | 3 | 1 | 1.545798 | ##### |  |
| 34 | 2 IT | 2020-12 | 2 IT-Northeast | 3 | 2 | 2.652174 | ##### |  |
| 35 | 2 IT | 2020-12 | 2 IT-Northeast | 3 | 3 | 1.3      | ##### |  |
| 36 | 2 IT | 2020-12 | 2 IT-Northeast | 3 | 4 | 1.333333 | ##### |  |
| 37 | 2 IT | 2020-12 | 2 IT-Northeast | 3 | 5 | 1.071429 | ##### |  |
| 38 | 2 IT | 2020-12 | 2 IT-Northwest | 1 | 1 | 1.581057 | ##### |  |
| 39 | 2 IT | 2020-12 | 2 IT-Northwest | 1 | 2 | 2.179798 | ##### |  |
| 40 | 2 IT | 2020-12 | 2 IT-Northwest | 1 | 3 | 1.650787 | ##### |  |
| 41 | 2 IT | 2020-12 | 2 IT-Northwest | 1 | 4 | 1.5015   | ##### |  |
| 42 | 2 IT | 2020-12 | 2 IT-Northwest | 1 | 5 | 1.231896 | ##### |  |
| 43 | 2 IT | 2020-12 | 2 IT-Northwest | 2 | 1 | 1.622458 | ##### |  |
| 44 | 2 IT | 2020-12 | 2 IT-Northwest | 2 | 2 | 2.264151 | ##### |  |
| 45 | 2 IT | 2020-12 | 2 IT-Northwest | 2 | 3 | 1.786885 | ##### |  |
| 46 | 2 IT | 2020-12 | 2 IT-Northwest | 2 | 4 | 1.692308 | ##### |  |
| 47 | 2 IT | 2020-12 | 2 IT-Northwest | 2 | 5 | 1.12     | ##### |  |
| 48 | 2 IT | 2020-12 | 2 IT-Northwest | 3 | 1 | 1.537414 | ##### |  |
| 49 | 2 IT | 2020-12 | 2 IT-Northwest | 3 | 2 | 2.095238 | ##### |  |
| 50 | 2 IT | 2020-12 | 2 IT-Northwest | 3 | 3 | 1.545455 | ##### |  |
| 51 | 2 IT | 2020-12 | 2 IT-Northwest | 3 | 4 | 1.263158 | ##### |  |
| 52 | 2 IT | 2020-12 | 2 IT-Northwest | 3 | 5 | 1.368421 | ##### |  |
| 53 | 2 IT | 2020-12 | 2 IT-Overall   | 1 | 1 | 1.638589 | ##### |  |
| 54 | 2 IT | 2020-12 | 2 IT-Overall   | 1 | 2 | 2.415386 | ##### |  |
| 55 | 2 IT | 2020-12 | 2 IT-Overall   | 1 | 3 | 1.793195 | ##### |  |
| 56 | 2 IT | 2020-12 | 2 IT-Overall   | 1 | 4 | 1.514    | ##### |  |
| 57 | 2 IT | 2020-12 | 2 IT-Overall   | 1 | 5 | 1.151706 | ##### |  |
| 58 | 2 IT | 2020-12 | 2 IT-Overall   | 2 | 1 | 1.553492 | ##### |  |

|    |      |         |                |   |   |          |       |  |  |
|----|------|---------|----------------|---|---|----------|-------|--|--|
| 1  |      |         |                |   |   |          |       |  |  |
| 2  |      |         |                |   |   |          |       |  |  |
| 3  | 2 IT | 2020-12 | 2 IT-Overall   | 2 | 2 | 2.243496 | ##### |  |  |
| 4  | 2 IT | 2020-12 | 2 IT-Overall   | 2 | 3 | 1.819396 | ##### |  |  |
| 5  | 2 IT | 2020-12 | 2 IT-Overall   | 2 | 4 | 1.527189 | ##### |  |  |
| 6  | 2 IT | 2020-12 | 2 IT-Overall   | 2 | 5 | #####    | ##### |  |  |
| 7  | 2 IT | 2020-12 | 2 IT-Overall   | 3 | 1 | 1.717988 | ##### |  |  |
| 8  | 2 IT | 2020-12 | 2 IT-Overall   | 3 | 2 | 2.545035 | ##### |  |  |
| 9  | 2 IT | 2020-12 | 2 IT-Overall   | 3 | 3 | 1.77159  | ##### |  |  |
| 10 | 2 IT | 2020-12 | 2 IT-Overall   | 3 | 4 | 1.498728 | ##### |  |  |
| 11 | 2 IT | 2020-12 | 2 IT-Overall   | 3 | 5 | 1.312575 | ##### |  |  |
| 12 | 2 IT | 2020-12 | 2 IT-South     | 1 | 1 | 1.793799 | ##### |  |  |
| 13 | 2 IT | 2020-12 | 2 IT-South     | 1 | 2 | 2.644615 | ##### |  |  |
| 14 | 2 IT | 2020-12 | 2 IT-South     | 1 | 3 | 2.082052 | ##### |  |  |
| 15 | 2 IT | 2020-12 | 2 IT-South     | 1 | 4 | 1.38533  | ##### |  |  |
| 16 | 2 IT | 2020-12 | 2 IT-South     | 1 | 5 | 1.376728 | ##### |  |  |
| 17 | 2 IT | 2020-12 | 2 IT-South     | 2 | 1 | 1.569642 | ##### |  |  |
| 18 | 2 IT | 2020-12 | 2 IT-South     | 2 | 2 | 2.15     | ##### |  |  |
| 19 | 2 IT | 2020-12 | 2 IT-South     | 2 | 3 | 2.113636 | ##### |  |  |
| 20 | 2 IT | 2020-12 | 2 IT-South     | 2 | 4 | 1.324324 | ##### |  |  |
| 21 | 2 IT | 2020-12 | 2 IT-South     | 2 | 5 | 1.071429 | ##### |  |  |
| 22 | 2 IT | 2020-12 | 2 IT-South     | 3 | 1 | 2.037246 | ##### |  |  |
| 23 | 2 IT | 2020-12 | 2 IT-South     | 3 | 2 | 2.9375   | ##### |  |  |
| 24 | 2 IT | 2020-12 | 2 IT-South     | 3 | 3 | 2.052632 | ##### |  |  |
| 25 | 2 IT | 2020-12 | 2 IT-South     | 3 | 4 | 1.5      | ##### |  |  |
| 26 | 2 IT | 2020-12 | 2 IT-South     | 3 | 5 | 1.7      | ##### |  |  |
| 27 | 2 IT | 2020-12 | 3 IT-Central   | 1 | 1 | 0        | 0     |  |  |
| 28 | 2 IT | 2020-12 | 3 IT-Central   | 1 | 2 | 0        | 0     |  |  |
| 29 | 2 IT | 2020-12 | 3 IT-Central   | 1 | 3 | 0        | 0     |  |  |
| 30 | 2 IT | 2020-12 | 3 IT-Central   | 1 | 4 | 0        | 0     |  |  |
| 31 | 2 IT | 2020-12 | 3 IT-Central   | 1 | 5 | 0        | 0     |  |  |
| 32 | 2 IT | 2020-12 | 3 IT-Central   | 2 | 1 | 0        | 0     |  |  |
| 33 | 2 IT | 2020-12 | 3 IT-Central   | 2 | 2 | 0        | 0     |  |  |
| 34 | 2 IT | 2020-12 | 3 IT-Central   | 2 | 3 | 0        | 0     |  |  |
| 35 | 2 IT | 2020-12 | 3 IT-Central   | 2 | 4 | 0        | 0     |  |  |
| 36 | 2 IT | 2020-12 | 3 IT-Central   | 2 | 5 | 0        | 0     |  |  |
| 37 | 2 IT | 2020-12 | 3 IT-Central   | 3 | 1 | 0        | 0     |  |  |
| 38 | 2 IT | 2020-12 | 3 IT-Central   | 3 | 2 | 0        | 0     |  |  |
| 39 | 2 IT | 2020-12 | 3 IT-Central   | 3 | 3 | 0        | 0     |  |  |
| 40 | 2 IT | 2020-12 | 3 IT-Central   | 3 | 4 | 0        | 0     |  |  |
| 41 | 2 IT | 2020-12 | 3 IT-Central   | 3 | 5 | 0        | 0     |  |  |
| 42 | 2 IT | 2020-12 | 3 IT-Insular   | 1 | 1 | 0        | 0     |  |  |
| 43 | 2 IT | 2020-12 | 3 IT-Insular   | 1 | 2 | 0        | 0     |  |  |
| 44 | 2 IT | 2020-12 | 3 IT-Insular   | 1 | 3 | 0        | 0     |  |  |
| 45 | 2 IT | 2020-12 | 3 IT-Insular   | 1 | 4 | 0        | 0     |  |  |
| 46 | 2 IT | 2020-12 | 3 IT-Insular   | 1 | 5 | 0        | 0     |  |  |
| 47 | 2 IT | 2020-12 | 3 IT-Insular   | 2 | 1 | 0        | 0     |  |  |
| 48 | 2 IT | 2020-12 | 3 IT-Insular   | 2 | 2 | 0        | 0     |  |  |
| 49 | 2 IT | 2020-12 | 3 IT-Insular   | 2 | 3 | 0        | 0     |  |  |
| 50 | 2 IT | 2020-12 | 3 IT-Insular   | 2 | 4 | 0        | 0     |  |  |
| 51 | 2 IT | 2020-12 | 3 IT-Insular   | 2 | 5 | 0        | 0     |  |  |
| 52 | 2 IT | 2020-12 | 3 IT-Insular   | 3 | 1 | 0        | 0     |  |  |
| 53 | 2 IT | 2020-12 | 3 IT-Insular   | 3 | 2 | 0        | 0     |  |  |
| 54 | 2 IT | 2020-12 | 3 IT-Insular   | 3 | 3 | 0        | 0     |  |  |
| 55 | 2 IT | 2020-12 | 3 IT-Insular   | 3 | 4 | 0        | 0     |  |  |
| 56 | 2 IT | 2020-12 | 3 IT-Insular   | 3 | 5 | 0        | 0     |  |  |
| 57 | 2 IT | 2020-12 | 3 IT-Northeast | 1 | 1 | 0        | 0     |  |  |
| 58 | 2 IT | 2020-12 | 3 IT-Northeast | 1 | 2 | 0        | 0     |  |  |
| 59 | 2 IT | 2020-12 | 3 IT-Northeast | 1 | 3 | 0        | 0     |  |  |
| 60 | 2 IT | 2020-12 | 3 IT-Northeast | 1 | 4 | 0        | 0     |  |  |

|    |      |         |                |   |   |   |   |
|----|------|---------|----------------|---|---|---|---|
| 1  |      |         |                |   |   |   |   |
| 2  |      |         |                |   |   |   |   |
| 3  | 2 IT | 2020-12 | 3 IT-Northeast | 1 | 3 | 0 | 0 |
| 4  | 2 IT | 2020-12 | 3 IT-Northeast | 1 | 4 | 0 | 0 |
| 5  | 2 IT | 2020-12 | 3 IT-Northeast | 1 | 5 | 0 | 0 |
| 6  | 2 IT | 2020-12 | 3 IT-Northeast | 2 | 1 | 0 | 0 |
| 7  | 2 IT | 2020-12 | 3 IT-Northeast | 2 | 2 | 0 | 0 |
| 8  | 2 IT | 2020-12 | 3 IT-Northeast | 2 | 3 | 0 | 0 |
| 9  | 2 IT | 2020-12 | 3 IT-Northeast | 2 | 4 | 0 | 0 |
| 10 | 2 IT | 2020-12 | 3 IT-Northeast | 2 | 5 | 0 | 0 |
| 11 | 2 IT | 2020-12 | 3 IT-Northeast | 3 | 1 | 0 | 0 |
| 12 | 2 IT | 2020-12 | 3 IT-Northeast | 3 | 2 | 0 | 0 |
| 13 | 2 IT | 2020-12 | 3 IT-Northeast | 3 | 3 | 0 | 0 |
| 14 | 2 IT | 2020-12 | 3 IT-Northeast | 3 | 4 | 0 | 0 |
| 15 | 2 IT | 2020-12 | 3 IT-Northeast | 3 | 5 | 0 | 0 |
| 16 | 2 IT | 2020-12 | 3 IT-Northwest | 1 | 1 | 0 | 0 |
| 17 | 2 IT | 2020-12 | 3 IT-Northwest | 1 | 2 | 0 | 0 |
| 18 | 2 IT | 2020-12 | 3 IT-Northwest | 1 | 3 | 0 | 0 |
| 19 | 2 IT | 2020-12 | 3 IT-Northwest | 1 | 4 | 0 | 0 |
| 20 | 2 IT | 2020-12 | 3 IT-Northwest | 1 | 5 | 0 | 0 |
| 21 | 2 IT | 2020-12 | 3 IT-Northwest | 2 | 1 | 0 | 0 |
| 22 | 2 IT | 2020-12 | 3 IT-Northwest | 2 | 2 | 0 | 0 |
| 23 | 2 IT | 2020-12 | 3 IT-Northwest | 2 | 3 | 0 | 0 |
| 24 | 2 IT | 2020-12 | 3 IT-Northwest | 2 | 4 | 0 | 0 |
| 25 | 2 IT | 2020-12 | 3 IT-Northwest | 2 | 5 | 0 | 0 |
| 26 | 2 IT | 2020-12 | 3 IT-Northwest | 3 | 1 | 0 | 0 |
| 27 | 2 IT | 2020-12 | 3 IT-Northwest | 3 | 2 | 0 | 0 |
| 28 | 2 IT | 2020-12 | 3 IT-Northwest | 3 | 3 | 0 | 0 |
| 29 | 2 IT | 2020-12 | 3 IT-Northwest | 3 | 4 | 0 | 0 |
| 30 | 2 IT | 2020-12 | 3 IT-Northwest | 3 | 5 | 0 | 0 |
| 31 | 2 IT | 2020-12 | 3 IT-Northwest | 3 | 5 | 0 | 0 |
| 32 | 2 IT | 2020-12 | 3 IT-Overall   | 1 | 1 | 0 | 0 |
| 33 | 2 IT | 2020-12 | 3 IT-Overall   | 1 | 2 | 0 | 0 |
| 34 | 2 IT | 2020-12 | 3 IT-Overall   | 1 | 3 | 0 | 0 |
| 35 | 2 IT | 2020-12 | 3 IT-Overall   | 1 | 4 | 0 | 0 |
| 36 | 2 IT | 2020-12 | 3 IT-Overall   | 1 | 5 | 0 | 0 |
| 37 | 2 IT | 2020-12 | 3 IT-Overall   | 2 | 1 | 0 | 0 |
| 38 | 2 IT | 2020-12 | 3 IT-Overall   | 2 | 2 | 0 | 0 |
| 39 | 2 IT | 2020-12 | 3 IT-Overall   | 2 | 3 | 0 | 0 |
| 40 | 2 IT | 2020-12 | 3 IT-Overall   | 2 | 4 | 0 | 0 |
| 41 | 2 IT | 2020-12 | 3 IT-Overall   | 2 | 5 | 0 | 0 |
| 42 | 2 IT | 2020-12 | 3 IT-Overall   | 3 | 1 | 0 | 0 |
| 43 | 2 IT | 2020-12 | 3 IT-Overall   | 3 | 2 | 0 | 0 |
| 44 | 2 IT | 2020-12 | 3 IT-Overall   | 3 | 3 | 0 | 0 |
| 45 | 2 IT | 2020-12 | 3 IT-Overall   | 3 | 4 | 0 | 0 |
| 46 | 2 IT | 2020-12 | 3 IT-Overall   | 3 | 5 | 0 | 0 |
| 47 | 2 IT | 2020-12 | 3 IT-South     | 1 | 1 | 0 | 0 |
| 48 | 2 IT | 2020-12 | 3 IT-South     | 1 | 2 | 0 | 0 |
| 49 | 2 IT | 2020-12 | 3 IT-South     | 1 | 3 | 0 | 0 |
| 50 | 2 IT | 2020-12 | 3 IT-South     | 1 | 4 | 0 | 0 |
| 51 | 2 IT | 2020-12 | 3 IT-South     | 1 | 5 | 0 | 0 |
| 52 | 2 IT | 2020-12 | 3 IT-South     | 2 | 1 | 0 | 0 |
| 53 | 2 IT | 2020-12 | 3 IT-South     | 2 | 2 | 0 | 0 |
| 54 | 2 IT | 2020-12 | 3 IT-South     | 2 | 3 | 0 | 0 |
| 55 | 2 IT | 2020-12 | 3 IT-South     | 2 | 4 | 0 | 0 |
| 56 | 2 IT | 2020-12 | 3 IT-South     | 2 | 5 | 0 | 0 |
| 57 | 2 IT | 2020-12 | 3 IT-South     | 3 | 1 | 0 | 0 |
| 58 | 2 IT | 2020-12 | 3 IT-South     | 3 | 2 | 0 | 0 |
| 59 | 2 IT | 2020-12 | 3 IT-South     | 3 | 3 | 0 | 0 |
| 60 | 2 IT | 2020-12 | 3 IT-South     | 3 | 3 | 0 | 0 |

1  
2  
3  
4  
5  
6  
7  
8  
9  
10  
11  
12  
13  
14  
15  
16  
17  
18  
19  
20  
21  
22  
23  
24  
25  
26  
27  
28  
29  
30  
31  
32  
33  
34  
35  
36  
37  
38  
39  
40  
41  
42  
43  
44  
45  
46  
47  
48  
49  
50  
51  
52  
53  
54  
55  
56  
57  
58  
59  
60

|      |         |                |   |   |          |          |
|------|---------|----------------|---|---|----------|----------|
| 2 IT | 2020-12 | 3 IT-South     | 3 | 4 | 0        | 0        |
| 2 IT | 2020-12 | 3 IT-South     | 3 | 5 | 0        | 0        |
| 2 IT | 2020-12 | 4 IT-Central   | 1 | 1 | #####    | #####    |
| 2 IT | 2020-12 | 4 IT-Central   | 1 | 2 | #####    | #####    |
| 2 IT | 2020-12 | 4 IT-Central   | 1 | 3 | #####    | #####    |
| 2 IT | 2020-12 | 4 IT-Central   | 1 | 4 | #####    | #####    |
| 2 IT | 2020-12 | 4 IT-Central   | 1 | 5 | #####    | #####    |
| 2 IT | 2020-12 | 4 IT-Central   | 2 | 1 | #####    | #####    |
| 2 IT | 2020-12 | 4 IT-Central   | 2 | 2 | #####    | #####    |
| 2 IT | 2020-12 | 4 IT-Central   | 2 | 3 | #####    | #####    |
| 2 IT | 2020-12 | 4 IT-Central   | 2 | 4 | 0.09375  | #####    |
| 2 IT | 2020-12 | 4 IT-Central   | 2 | 5 | #####    | #####    |
| 2 IT | 2020-12 | 4 IT-Central   | 3 | 1 | #####    | #####    |
| 2 IT | 2020-12 | 4 IT-Central   | 3 | 2 | #####    | #####    |
| 2 IT | 2020-12 | 4 IT-Central   | 3 | 3 | #####    | #####    |
| 2 IT | 2020-12 | 4 IT-Central   | 3 | 4 | 1.37037  | #####    |
| 2 IT | 2020-12 | 4 IT-Central   | 3 | 5 | 0        | 0        |
| 2 IT | 2020-12 | 4 IT-Insular   | 1 | 1 | #####    | #####    |
| 2 IT | 2020-12 | 4 IT-Insular   | 1 | 2 | #####    | #####    |
| 2 IT | 2020-12 | 4 IT-Insular   | 1 | 3 | #####    | #####    |
| 2 IT | 2020-12 | 4 IT-Insular   | 1 | 4 | 1.178883 | #####    |
| 2 IT | 2020-12 | 4 IT-Insular   | 1 | 5 | #####    | #####    |
| 2 IT | 2020-12 | 4 IT-Insular   | 2 | 1 | #####    | #####    |
| 2 IT | 2020-12 | 4 IT-Insular   | 2 | 2 | 0        | 0        |
| 2 IT | 2020-12 | 4 IT-Insular   | 2 | 3 | 0        | 0        |
| 2 IT | 2020-12 | 4 IT-Insular   | 2 | 4 | 0.45     | #####    |
| 2 IT | 2020-12 | 4 IT-Insular   | 2 | 5 | #####    | #####    |
| 2 IT | 2020-12 | 4 IT-Insular   | 3 | 1 | 1.009213 | #####    |
| 2 IT | 2020-12 | 4 IT-Insular   | 3 | 2 | 1.545455 | 1.086148 |
| 2 IT | 2020-12 | 4 IT-Insular   | 3 | 3 | 1.238095 | #####    |
| 2 IT | 2020-12 | 4 IT-Insular   | 3 | 4 | 1.692308 | #####    |
| 2 IT | 2020-12 | 4 IT-Insular   | 3 | 5 | 0        | 0        |
| 2 IT | 2020-12 | 4 IT-Northeast | 1 | 1 | #####    | #####    |
| 2 IT | 2020-12 | 4 IT-Northeast | 1 | 2 | #####    | #####    |
| 2 IT | 2020-12 | 4 IT-Northeast | 1 | 3 | 1.042875 | #####    |
| 2 IT | 2020-12 | 4 IT-Northeast | 1 | 4 | #####    | #####    |
| 2 IT | 2020-12 | 4 IT-Northeast | 1 | 5 | 0        | 0        |
| 2 IT | 2020-12 | 4 IT-Northeast | 2 | 1 | #####    | #####    |
| 2 IT | 2020-12 | 4 IT-Northeast | 2 | 2 | #####    | #####    |
| 2 IT | 2020-12 | 4 IT-Northeast | 2 | 3 | #####    | #####    |
| 2 IT | 2020-12 | 4 IT-Northeast | 2 | 4 | #####    | #####    |
| 2 IT | 2020-12 | 4 IT-Northeast | 2 | 5 | 0        | 0        |
| 2 IT | 2020-12 | 4 IT-Northeast | 3 | 1 | #####    | #####    |
| 2 IT | 2020-12 | 4 IT-Northeast | 3 | 2 | 1.434783 | #####    |
| 2 IT | 2020-12 | 4 IT-Northeast | 3 | 3 | 1.146341 | #####    |
| 2 IT | 2020-12 | 4 IT-Northeast | 3 | 4 | #####    | #####    |
| 2 IT | 2020-12 | 4 IT-Northeast | 3 | 5 | 0        | 0        |
| 2 IT | 2020-12 | 4 IT-Northwest | 1 | 1 | #####    | #####    |
| 2 IT | 2020-12 | 4 IT-Northwest | 1 | 2 | #####    | #####    |
| 2 IT | 2020-12 | 4 IT-Northwest | 1 | 3 | 1.381176 | #####    |
| 2 IT | 2020-12 | 4 IT-Northwest | 1 | 4 | #####    | #####    |
| 2 IT | 2020-12 | 4 IT-Northwest | 1 | 5 | 0        | 0        |
| 2 IT | 2020-12 | 4 IT-Northwest | 2 | 1 | #####    | #####    |
| 2 IT | 2020-12 | 4 IT-Northwest | 2 | 2 | #####    | #####    |
| 2 IT | 2020-12 | 4 IT-Northwest | 2 | 3 | #####    | #####    |
| 2 IT | 2020-12 | 4 IT-Northwest | 2 | 4 | #####    | #####    |

|    |      |         |              |   |   |          |          |  |
|----|------|---------|--------------|---|---|----------|----------|--|
| 1  |      |         |              |   |   |          |          |  |
| 2  |      |         |              |   |   |          |          |  |
| 3  | 2 IT | 2020-12 | 4 IT-Northwe | 2 | 5 | 0        | 0        |  |
| 4  | 2 IT | 2020-12 | 4 IT-Northwe | 3 | 1 | #####    | #####    |  |
| 5  | 2 IT | 2020-12 | 4 IT-Northwe | 3 | 2 | #####    | #####    |  |
| 6  | 2 IT | 2020-12 | 4 IT-Northwe | 3 | 3 | 2        | #####    |  |
| 7  | 2 IT | 2020-12 | 4 IT-Northwe | 3 | 4 | #####    | #####    |  |
| 8  | 2 IT | 2020-12 | 4 IT-Northwe | 3 | 5 | 0        | 0        |  |
| 9  | 2 IT | 2020-12 | 4 IT-Overall | 1 | 1 | #####    | #####    |  |
| 10 | 2 IT | 2020-12 | 4 IT-Overall | 1 | 2 | #####    | #####    |  |
| 11 | 2 IT | 2020-12 | 4 IT-Overall | 1 | 3 | 1.157113 | #####    |  |
| 12 | 2 IT | 2020-12 | 4 IT-Overall | 1 | 4 | #####    | #####    |  |
| 13 | 2 IT | 2020-12 | 4 IT-Overall | 1 | 5 | #####    | #####    |  |
| 14 | 2 IT | 2020-12 | 4 IT-Overall | 2 | 1 | #####    | #####    |  |
| 15 | 2 IT | 2020-12 | 4 IT-Overall | 2 | 2 | #####    | #####    |  |
| 16 | 2 IT | 2020-12 | 4 IT-Overall | 2 | 3 | #####    | #####    |  |
| 17 | 2 IT | 2020-12 | 4 IT-Overall | 2 | 4 | #####    | #####    |  |
| 18 | 2 IT | 2020-12 | 4 IT-Overall | 2 | 5 | #####    | #####    |  |
| 19 | 2 IT | 2020-12 | 4 IT-Overall | 3 | 1 | #####    | #####    |  |
| 20 | 2 IT | 2020-12 | 4 IT-Overall | 3 | 2 | #####    | #####    |  |
| 21 | 2 IT | 2020-12 | 4 IT-Overall | 3 | 3 | 1.59205  | #####    |  |
| 22 | 2 IT | 2020-12 | 4 IT-Overall | 3 | 4 | #####    | #####    |  |
| 23 | 2 IT | 2020-12 | 4 IT-Overall | 3 | 5 | 0        | 0        |  |
| 24 | 2 IT | 2020-12 | 4 IT-Overall | 3 | 5 | 0        | 0        |  |
| 25 | 2 IT | 2020-12 | 4 IT-South   | 1 | 1 | #####    | #####    |  |
| 26 | 2 IT | 2020-12 | 4 IT-South   | 1 | 2 | 0        | 0        |  |
| 27 | 2 IT | 2020-12 | 4 IT-South   | 1 | 3 | 1.502814 | #####    |  |
| 28 | 2 IT | 2020-12 | 4 IT-South   | 1 | 4 | #####    | #####    |  |
| 29 | 2 IT | 2020-12 | 4 IT-South   | 1 | 5 | 0        | 0        |  |
| 30 | 2 IT | 2020-12 | 4 IT-South   | 2 | 1 | #####    | #####    |  |
| 31 | 2 IT | 2020-12 | 4 IT-South   | 2 | 2 | 0        | 0        |  |
| 32 | 2 IT | 2020-12 | 4 IT-South   | 2 | 3 | #####    | #####    |  |
| 33 | 2 IT | 2020-12 | 4 IT-South   | 2 | 4 | #####    | #####    |  |
| 34 | 2 IT | 2020-12 | 4 IT-South   | 2 | 5 | 0        | 0        |  |
| 35 | 2 IT | 2020-12 | 4 IT-South   | 3 | 1 | #####    | #####    |  |
| 36 | 2 IT | 2020-12 | 4 IT-South   | 3 | 2 | 0        | 0        |  |
| 37 | 2 IT | 2020-12 | 4 IT-South   | 3 | 3 | 2.3      | 1.245272 |  |
| 38 | 2 IT | 2020-12 | 4 IT-South   | 3 | 4 | 0        | 0        |  |
| 39 | 2 IT | 2020-12 | 4 IT-South   | 3 | 5 | 0        | 0        |  |
| 40 | 2 IT | 2020-12 | 5 IT-Central | 1 | 1 | #####    | #####    |  |
| 41 | 2 IT | 2020-12 | 5 IT-Central | 1 | 2 | #####    | #####    |  |
| 42 | 2 IT | 2020-12 | 5 IT-Central | 1 | 3 | #####    | #####    |  |
| 43 | 2 IT | 2020-12 | 5 IT-Central | 1 | 4 | #####    | #####    |  |
| 44 | 2 IT | 2020-12 | 5 IT-Central | 1 | 5 | #####    | #####    |  |
| 45 | 2 IT | 2020-12 | 5 IT-Central | 2 | 1 | #####    | #####    |  |
| 46 | 2 IT | 2020-12 | 5 IT-Central | 2 | 2 | #####    | #####    |  |
| 47 | 2 IT | 2020-12 | 5 IT-Central | 2 | 3 | #####    | #####    |  |
| 48 | 2 IT | 2020-12 | 5 IT-Central | 2 | 4 | 0.625    | #####    |  |
| 49 | 2 IT | 2020-12 | 5 IT-Central | 2 | 5 | #####    | #####    |  |
| 50 | 2 IT | 2020-12 | 5 IT-Central | 3 | 1 | #####    | #####    |  |
| 51 | 2 IT | 2020-12 | 5 IT-Central | 3 | 2 | #####    | #####    |  |
| 52 | 2 IT | 2020-12 | 5 IT-Central | 3 | 3 | #####    | #####    |  |
| 53 | 2 IT | 2020-12 | 5 IT-Central | 3 | 4 | #####    | #####    |  |
| 54 | 2 IT | 2020-12 | 5 IT-Central | 3 | 5 | 1.266667 | #####    |  |
| 55 | 2 IT | 2020-12 | 5 IT-Insular | 1 | 1 | #####    | #####    |  |
| 56 | 2 IT | 2020-12 | 5 IT-Insular | 1 | 2 | #####    | #####    |  |
| 57 | 2 IT | 2020-12 | 5 IT-Insular | 1 | 3 | #####    | #####    |  |
| 58 | 2 IT | 2020-12 | 5 IT-Insular | 1 | 4 | #####    | #####    |  |
| 59 | 2 IT | 2020-12 | 5 IT-Insular | 1 | 5 | #####    | #####    |  |
| 60 | 2 IT | 2020-12 | 5 IT-Insular | 1 | 5 | #####    | #####    |  |

1  
2  
3  
4  
5  
6  
7  
8  
9  
10  
11  
12  
13  
14  
15  
16  
17  
18  
19  
20  
21  
22  
23  
24  
25  
26  
27  
28  
29  
30  
31  
32  
33  
34  
35  
36  
37  
38  
39  
40  
41  
42  
43  
44  
45  
46  
47  
48  
49  
50  
51  
52  
53  
54  
55  
56  
57  
58  
59  
60

|      |         |                |   |   |          |       |
|------|---------|----------------|---|---|----------|-------|
| 2 IT | 2020-12 | 5 IT-Insular   | 2 | 1 | #####    | ##### |
| 2 IT | 2020-12 | 5 IT-Insular   | 2 | 2 | #####    | ##### |
| 2 IT | 2020-12 | 5 IT-Insular   | 2 | 3 | #####    | ##### |
| 2 IT | 2020-12 | 5 IT-Insular   | 2 | 4 | 0.15     | ##### |
| 2 IT | 2020-12 | 5 IT-Insular   | 2 | 5 | #####    | ##### |
| 2 IT | 2020-12 | 5 IT-Insular   | 3 | 1 | #####    | ##### |
| 2 IT | 2020-12 | 5 IT-Insular   | 3 | 2 | #####    | ##### |
| 2 IT | 2020-12 | 5 IT-Insular   | 3 | 3 | #####    | ##### |
| 2 IT | 2020-12 | 5 IT-Insular   | 3 | 4 | 1.230769 | ##### |
| 2 IT | 2020-12 | 5 IT-Insular   | 3 | 5 | 0.125    | ##### |
| 2 IT | 2020-12 | 5 IT-Northeast | 1 | 1 | #####    | ##### |
| 2 IT | 2020-12 | 5 IT-Northeast | 1 | 2 | #####    | ##### |
| 2 IT | 2020-12 | 5 IT-Northeast | 1 | 3 | #####    | ##### |
| 2 IT | 2020-12 | 5 IT-Northeast | 1 | 4 | #####    | ##### |
| 2 IT | 2020-12 | 5 IT-Northeast | 1 | 5 | #####    | ##### |
| 2 IT | 2020-12 | 5 IT-Northeast | 2 | 1 | #####    | ##### |
| 2 IT | 2020-12 | 5 IT-Northeast | 2 | 2 | #####    | ##### |
| 2 IT | 2020-12 | 5 IT-Northeast | 2 | 3 | #####    | ##### |
| 2 IT | 2020-12 | 5 IT-Northeast | 2 | 4 | #####    | ##### |
| 2 IT | 2020-12 | 5 IT-Northeast | 2 | 5 | #####    | ##### |
| 2 IT | 2020-12 | 5 IT-Northeast | 3 | 1 | 1.035751 | ##### |
| 2 IT | 2020-12 | 5 IT-Northeast | 3 | 2 | #####    | ##### |
| 2 IT | 2020-12 | 5 IT-Northeast | 3 | 3 | #####    | ##### |
| 2 IT | 2020-12 | 5 IT-Northeast | 3 | 4 | 1.238095 | ##### |
| 2 IT | 2020-12 | 5 IT-Northeast | 3 | 5 | 1.6      | ##### |
| 2 IT | 2020-12 | 5 IT-Northwest | 1 | 1 | #####    | ##### |
| 2 IT | 2020-12 | 5 IT-Northwest | 1 | 2 | #####    | ##### |
| 2 IT | 2020-12 | 5 IT-Northwest | 1 | 3 | #####    | ##### |
| 2 IT | 2020-12 | 5 IT-Northwest | 1 | 4 | #####    | ##### |
| 2 IT | 2020-12 | 5 IT-Northwest | 1 | 5 | #####    | ##### |
| 2 IT | 2020-12 | 5 IT-Northwest | 2 | 1 | #####    | ##### |
| 2 IT | 2020-12 | 5 IT-Northwest | 2 | 2 | #####    | ##### |
| 2 IT | 2020-12 | 5 IT-Northwest | 2 | 3 | 0.375    | ##### |
| 2 IT | 2020-12 | 5 IT-Northwest | 2 | 4 | 0.375    | ##### |
| 2 IT | 2020-12 | 5 IT-Northwest | 2 | 5 | #####    | ##### |
| 2 IT | 2020-12 | 5 IT-Northwest | 3 | 1 | #####    | ##### |
| 2 IT | 2020-12 | 5 IT-Northwest | 3 | 2 | 0.65     | ##### |
| 2 IT | 2020-12 | 5 IT-Northwest | 3 | 3 | #####    | ##### |
| 2 IT | 2020-12 | 5 IT-Northwest | 3 | 4 | #####    | ##### |
| 2 IT | 2020-12 | 5 IT-Northwest | 3 | 5 | 0.8      | ##### |
| 2 IT | 2020-12 | 5 IT-Overall   | 1 | 1 | #####    | ##### |
| 2 IT | 2020-12 | 5 IT-Overall   | 1 | 2 | #####    | ##### |
| 2 IT | 2020-12 | 5 IT-Overall   | 1 | 3 | #####    | ##### |
| 2 IT | 2020-12 | 5 IT-Overall   | 1 | 4 | #####    | ##### |
| 2 IT | 2020-12 | 5 IT-Overall   | 1 | 5 | #####    | ##### |
| 2 IT | 2020-12 | 5 IT-Overall   | 2 | 1 | #####    | ##### |
| 2 IT | 2020-12 | 5 IT-Overall   | 2 | 2 | #####    | ##### |
| 2 IT | 2020-12 | 5 IT-Overall   | 2 | 3 | #####    | ##### |
| 2 IT | 2020-12 | 5 IT-Overall   | 2 | 4 | #####    | ##### |
| 2 IT | 2020-12 | 5 IT-Overall   | 2 | 5 | #####    | ##### |
| 2 IT | 2020-12 | 5 IT-Overall   | 3 | 1 | #####    | ##### |
| 2 IT | 2020-12 | 5 IT-Overall   | 3 | 2 | #####    | ##### |
| 2 IT | 2020-12 | 5 IT-Overall   | 3 | 3 | #####    | ##### |
| 2 IT | 2020-12 | 5 IT-Overall   | 3 | 4 | 1.197748 | ##### |
| 2 IT | 2020-12 | 5 IT-Overall   | 3 | 5 | #####    | ##### |
| 2 IT | 2020-12 | 5 IT-South     | 1 | 1 | #####    | ##### |

|    |      |         |                |   |   |          |          |
|----|------|---------|----------------|---|---|----------|----------|
| 1  |      |         |                |   |   |          |          |
| 2  |      |         |                |   |   |          |          |
| 3  | 2 IT | 2020-12 | 5 IT-South     | 1 | 2 | #####    | #####    |
| 4  | 2 IT | 2020-12 | 5 IT-South     | 1 | 3 | #####    | #####    |
| 5  | 2 IT | 2020-12 | 5 IT-South     | 1 | 4 | 1.193205 | #####    |
| 6  | 2 IT | 2020-12 | 5 IT-South     | 1 | 5 | #####    | #####    |
| 7  | 2 IT | 2020-12 | 5 IT-South     | 2 | 1 | #####    | #####    |
| 8  | 2 IT | 2020-12 | 5 IT-South     | 2 | 2 | #####    | #####    |
| 9  | 2 IT | 2020-12 | 5 IT-South     | 2 | 3 | #####    | #####    |
| 10 | 2 IT | 2020-12 | 5 IT-South     | 2 | 4 | #####    | #####    |
| 11 | 2 IT | 2020-12 | 5 IT-South     | 2 | 5 | #####    | #####    |
| 12 | 2 IT | 2020-12 | 5 IT-South     | 3 | 1 | #####    | #####    |
| 13 | 2 IT | 2020-12 | 5 IT-South     | 3 | 2 | 1.125    | #####    |
| 14 | 2 IT | 2020-12 | 5 IT-South     | 3 | 3 | 0.4      | #####    |
| 15 | 2 IT | 2020-12 | 5 IT-South     | 3 | 4 | 2.125    | #####    |
| 16 | 2 IT | 2020-12 | 5 IT-South     | 3 | 5 | #####    | #####    |
| 17 | 2 IT | 2020-13 | 1 IT-Central   | 1 | 1 | 2.816135 | #####    |
| 18 | 2 IT | 2020-13 | 1 IT-Central   | 1 | 2 | 2.893107 | #####    |
| 19 | 2 IT | 2020-13 | 1 IT-Central   | 1 | 3 | 3.787928 | #####    |
| 20 | 2 IT | 2020-13 | 1 IT-Central   | 1 | 4 | 2.888705 | #####    |
| 21 | 2 IT | 2020-13 | 1 IT-Central   | 1 | 5 | 1.663103 | #####    |
| 22 | 2 IT | 2020-13 | 1 IT-Central   | 2 | 1 | 2.528952 | #####    |
| 23 | 2 IT | 2020-13 | 1 IT-Central   | 2 | 2 | 3        | #####    |
| 24 | 2 IT | 2020-13 | 1 IT-Central   | 2 | 3 | 2.876106 | #####    |
| 25 | 2 IT | 2020-13 | 1 IT-Central   | 2 | 4 | 2.506024 | #####    |
| 26 | 2 IT | 2020-13 | 1 IT-Central   | 2 | 5 | 1.928571 | #####    |
| 27 | 2 IT | 2020-13 | 1 IT-Central   | 3 | 1 | 3.162142 | #####    |
| 28 | 2 IT | 2020-13 | 1 IT-Central   | 3 | 2 | 2.809524 | #####    |
| 29 | 2 IT | 2020-13 | 1 IT-Central   | 3 | 3 | 5.121212 | 1.084019 |
| 30 | 2 IT | 2020-13 | 1 IT-Central   | 3 | 4 | 3.428571 | #####    |
| 31 | 2 IT | 2020-13 | 1 IT-Central   | 3 | 5 | 1.4      | #####    |
| 32 | 2 IT | 2020-13 | 1 IT-Insular   | 1 | 1 | 2.509241 | #####    |
| 33 | 2 IT | 2020-13 | 1 IT-Insular   | 1 | 2 | 4.381854 | 1.755922 |
| 34 | 2 IT | 2020-13 | 1 IT-Insular   | 1 | 3 | 2.957753 | #####    |
| 35 | 2 IT | 2020-13 | 1 IT-Insular   | 1 | 4 | 2.313861 | #####    |
| 36 | 2 IT | 2020-13 | 1 IT-Insular   | 1 | 5 | 1.172934 | #####    |
| 37 | 2 IT | 2020-13 | 1 IT-Insular   | 2 | 1 | 2.168345 | #####    |
| 38 | 2 IT | 2020-13 | 1 IT-Insular   | 2 | 2 | 2.4      | #####    |
| 39 | 2 IT | 2020-13 | 1 IT-Insular   | 2 | 3 | 3.145455 | #####    |
| 40 | 2 IT | 2020-13 | 1 IT-Insular   | 2 | 4 | 1.852941 | #####    |
| 41 | 2 IT | 2020-13 | 1 IT-Insular   | 2 | 5 | 1.230769 | #####    |
| 42 | 2 IT | 2020-13 | 1 IT-Insular   | 3 | 1 | 3.110465 | #####    |
| 43 | 2 IT | 2020-13 | 1 IT-Insular   | 3 | 2 | 7.2      | 3.984227 |
| 44 | 2 IT | 2020-13 | 1 IT-Insular   | 3 | 3 | 2.6875   | #####    |
| 45 | 2 IT | 2020-13 | 1 IT-Insular   | 3 | 4 | 3.111111 | #####    |
| 46 | 2 IT | 2020-13 | 1 IT-Insular   | 3 | 5 | 1        | #####    |
| 47 | 2 IT | 2020-13 | 1 IT-Northeast | 1 | 1 | 2.957508 | #####    |
| 48 | 2 IT | 2020-13 | 1 IT-Northeast | 1 | 2 | 3.185679 | #####    |
| 49 | 2 IT | 2020-13 | 1 IT-Northeast | 1 | 3 | 3.611016 | #####    |
| 50 | 2 IT | 2020-13 | 1 IT-Northeast | 1 | 4 | 3.048041 | #####    |
| 51 | 2 IT | 2020-13 | 1 IT-Northeast | 1 | 5 | 1.788897 | #####    |
| 52 | 2 IT | 2020-13 | 1 IT-Northeast | 2 | 1 | 3.001405 | #####    |
| 53 | 2 IT | 2020-13 | 1 IT-Northeast | 2 | 2 | 2.984127 | #####    |
| 54 | 2 IT | 2020-13 | 1 IT-Northeast | 2 | 3 | 3.688406 | #####    |
| 55 | 2 IT | 2020-13 | 1 IT-Northeast | 2 | 4 | 3.339286 | #####    |
| 56 | 2 IT | 2020-13 | 1 IT-Northeast | 2 | 5 | 1.705882 | #####    |
| 57 | 2 IT | 2020-13 | 1 IT-Northeast | 3 | 1 | 2.903988 | #####    |
| 58 | 2 IT | 2020-13 | 1 IT-Northeast | 3 | 2 | 3.36     | #####    |
| 59 | 2 IT | 2020-13 | 1 IT-Northeast | 3 | 3 | 3.36     | #####    |
| 60 | 2 IT | 2020-13 | 1 IT-Northeast | 3 | 4 | 3.36     | #####    |

1  
2  
3  
4  
5  
6  
7  
8  
9  
10  
11  
12  
13  
14  
15  
16  
17  
18  
19  
20  
21  
22  
23  
24  
25  
26  
27  
28  
29  
30  
31  
32  
33  
34  
35  
36  
37  
38  
39  
40  
41  
42  
43  
44  
45  
46  
47  
48  
49  
50  
51  
52  
53  
54  
55  
56  
57  
58  
59  
60

|      |         |                |   |   |          |       |
|------|---------|----------------|---|---|----------|-------|
| 2 IT | 2020-13 | 1 IT-Northeast | 3 | 3 | 3.516129 | ##### |
| 2 IT | 2020-13 | 1 IT-Northeast | 3 | 4 | 2.730159 | ##### |
| 2 IT | 2020-13 | 1 IT-Northeast | 3 | 5 | 1.941176 | ##### |
| 2 IT | 2020-13 | 1 IT-Northwest | 1 | 1 | 2.818487 | ##### |
| 2 IT | 2020-13 | 1 IT-Northwest | 1 | 2 | 2.643129 | ##### |
| 2 IT | 2020-13 | 1 IT-Northwest | 1 | 3 | 3.724963 | ##### |
| 2 IT | 2020-13 | 1 IT-Northwest | 1 | 4 | 2.875988 | ##### |
| 2 IT | 2020-13 | 1 IT-Northwest | 1 | 5 | 1.296453 | ##### |
| 2 IT | 2020-13 | 1 IT-Northwest | 2 | 1 | 2.38633  | ##### |
| 2 IT | 2020-13 | 1 IT-Northwest | 2 | 2 | 2.929577 | ##### |
| 2 IT | 2020-13 | 1 IT-Northwest | 2 | 3 | 3.253659 | ##### |
| 2 IT | 2020-13 | 1 IT-Northwest | 2 | 4 | 2.354331 | ##### |
| 2 IT | 2020-13 | 1 IT-Northwest | 2 | 5 | 1.139535 | ##### |
| 2 IT | 2020-13 | 1 IT-Northwest | 3 | 1 | 3.409535 | ##### |
| 2 IT | 2020-13 | 1 IT-Northwest | 3 | 2 | 2.32     | ##### |
| 2 IT | 2020-13 | 1 IT-Northwest | 3 | 3 | 4.24359  | ##### |
| 2 IT | 2020-13 | 1 IT-Northwest | 3 | 4 | 3.559322 | ##### |
| 2 IT | 2020-13 | 1 IT-Northwest | 3 | 5 | 1.6875   | ##### |
| 2 IT | 2020-13 | 1 IT-Overall   | 1 | 1 | 2.736405 | ##### |
| 2 IT | 2020-13 | 1 IT-Overall   | 1 | 2 | 3.018573 | ##### |
| 2 IT | 2020-13 | 1 IT-Overall   | 1 | 3 | 3.390971 | ##### |
| 2 IT | 2020-13 | 1 IT-Overall   | 1 | 4 | 2.787063 | ##### |
| 2 IT | 2020-13 | 1 IT-Overall   | 1 | 5 | 1.442008 | ##### |
| 2 IT | 2020-13 | 1 IT-Overall   | 2 | 1 | 2.529455 | ##### |
| 2 IT | 2020-13 | 1 IT-Overall   | 2 | 2 | 3.066618 | ##### |
| 2 IT | 2020-13 | 1 IT-Overall   | 2 | 3 | 3.164005 | ##### |
| 2 IT | 2020-13 | 1 IT-Overall   | 2 | 4 | 2.567816 | ##### |
| 2 IT | 2020-13 | 1 IT-Overall   | 2 | 5 | 1.381584 | ##### |
| 2 IT | 2020-13 | 1 IT-Overall   | 3 | 1 | 3.001646 | ##### |
| 2 IT | 2020-13 | 1 IT-Overall   | 3 | 2 | 2.967654 | ##### |
| 2 IT | 2020-13 | 1 IT-Overall   | 3 | 3 | 3.644054 | ##### |
| 2 IT | 2020-13 | 1 IT-Overall   | 3 | 4 | 3.075569 | ##### |
| 2 IT | 2020-13 | 1 IT-Overall   | 3 | 5 | 1.545457 | ##### |
| 2 IT | 2020-13 | 1 IT-South     | 1 | 1 | 2.491154 | ##### |
| 2 IT | 2020-13 | 1 IT-South     | 1 | 2 | 2.904539 | ##### |
| 2 IT | 2020-13 | 1 IT-South     | 1 | 3 | 2.925627 | ##### |
| 2 IT | 2020-13 | 1 IT-South     | 1 | 4 | 2.520575 | ##### |
| 2 IT | 2020-13 | 1 IT-South     | 1 | 5 | 1.122304 | ##### |
| 2 IT | 2020-13 | 1 IT-South     | 2 | 1 | 2.446196 | ##### |
| 2 IT | 2020-13 | 1 IT-South     | 2 | 2 | 3.6      | ##### |
| 2 IT | 2020-13 | 1 IT-South     | 2 | 3 | 2.928571 | ##### |
| 2 IT | 2020-13 | 1 IT-South     | 2 | 4 | 2.444444 | ##### |
| 2 IT | 2020-13 | 1 IT-South     | 2 | 5 | #####    | ##### |
| 2 IT | 2020-13 | 1 IT-South     | 3 | 1 | 2.543855 | ##### |
| 2 IT | 2020-13 | 1 IT-South     | 3 | 2 | 1.875    | ##### |
| 2 IT | 2020-13 | 1 IT-South     | 3 | 3 | 2.923077 | ##### |
| 2 IT | 2020-13 | 1 IT-South     | 3 | 4 | 2.625    | ##### |
| 2 IT | 2020-13 | 1 IT-South     | 3 | 5 | 1.428571 | ##### |
| 2 IT | 2020-13 | 2 IT-Central   | 1 | 1 | 1.544147 | ##### |
| 2 IT | 2020-13 | 2 IT-Central   | 1 | 2 | 2.301565 | ##### |
| 2 IT | 2020-13 | 2 IT-Central   | 1 | 3 | 1.718832 | ##### |
| 2 IT | 2020-13 | 2 IT-Central   | 1 | 4 | 1.548473 | ##### |
| 2 IT | 2020-13 | 2 IT-Central   | 1 | 5 | #####    | ##### |
| 2 IT | 2020-13 | 2 IT-Central   | 2 | 1 | 1.577135 | ##### |
| 2 IT | 2020-13 | 2 IT-Central   | 2 | 2 | 2.261905 | ##### |
| 2 IT | 2020-13 | 2 IT-Central   | 2 | 3 | 1.825    | ##### |



|    |      |         |                |   |   |          |       |  |
|----|------|---------|----------------|---|---|----------|-------|--|
| 1  |      |         |                |   |   |          |       |  |
| 2  |      |         |                |   |   |          |       |  |
| 3  | 2 IT | 2020-13 | 2 IT-Central   | 2 | 4 | 1.545455 | ##### |  |
| 4  | 2 IT | 2020-13 | 2 IT-Central   | 2 | 5 | 1        | ##### |  |
| 5  | 2 IT | 2020-13 | 2 IT-Central   | 3 | 1 | 1.504069 | ##### |  |
| 6  | 2 IT | 2020-13 | 2 IT-Central   | 3 | 2 | 2.333333 | ##### |  |
| 7  | 2 IT | 2020-13 | 2 IT-Central   | 3 | 3 | 1.558824 | ##### |  |
| 8  | 2 IT | 2020-13 | 2 IT-Central   | 3 | 4 | 1.552632 | ##### |  |
| 9  | 2 IT | 2020-13 | 2 IT-Central   | 3 | 5 | 0.95     | ##### |  |
| 10 | 2 IT | 2020-13 | 2 IT-Insular   | 1 | 1 | 1.513636 | ##### |  |
| 11 | 2 IT | 2020-13 | 2 IT-Insular   | 1 | 2 | 2.418376 | ##### |  |
| 12 | 2 IT | 2020-13 | 2 IT-Insular   | 1 | 3 | 1.828745 | ##### |  |
| 13 | 2 IT | 2020-13 | 2 IT-Insular   | 1 | 4 | 1.312944 | ##### |  |
| 14 | 2 IT | 2020-13 | 2 IT-Insular   | 1 | 5 | #####    | ##### |  |
| 15 | 2 IT | 2020-13 | 2 IT-Insular   | 2 | 1 | 1.427439 | ##### |  |
| 16 | 2 IT | 2020-13 | 2 IT-Insular   | 2 | 2 | 2.15     | ##### |  |
| 17 | 2 IT | 2020-13 | 2 IT-Insular   | 2 | 3 | 2        | ##### |  |
| 18 | 2 IT | 2020-13 | 2 IT-Insular   | 2 | 4 | 1.114286 | ##### |  |
| 19 | 2 IT | 2020-13 | 2 IT-Insular   | 2 | 5 | #####    | ##### |  |
| 20 | 2 IT | 2020-13 | 2 IT-Insular   | 3 | 1 | 1.668018 | ##### |  |
| 21 | 2 IT | 2020-13 | 2 IT-Insular   | 3 | 2 | 2.8      | ##### |  |
| 22 | 2 IT | 2020-13 | 2 IT-Insular   | 3 | 3 | 1.588235 | ##### |  |
| 23 | 2 IT | 2020-13 | 2 IT-Insular   | 3 | 4 | 1.666667 | ##### |  |
| 24 | 2 IT | 2020-13 | 2 IT-Insular   | 3 | 5 | 1        | ##### |  |
| 25 | 2 IT | 2020-13 | 2 IT-Northeast | 1 | 1 | 1.486676 | ##### |  |
| 26 | 2 IT | 2020-13 | 2 IT-Northeast | 1 | 2 | 2.174559 | ##### |  |
| 27 | 2 IT | 2020-13 | 2 IT-Northeast | 1 | 3 | 1.604092 | ##### |  |
| 28 | 2 IT | 2020-13 | 2 IT-Northeast | 1 | 4 | 1.408846 | ##### |  |
| 29 | 2 IT | 2020-13 | 2 IT-Northeast | 1 | 5 | 1.103103 | ##### |  |
| 30 | 2 IT | 2020-13 | 2 IT-Northeast | 2 | 1 | 1.375746 | ##### |  |
| 31 | 2 IT | 2020-13 | 2 IT-Northeast | 2 | 2 | 2.0625   | ##### |  |
| 32 | 2 IT | 2020-13 | 2 IT-Northeast | 2 | 3 | 1.669014 | ##### |  |
| 33 | 2 IT | 2020-13 | 2 IT-Northeast | 2 | 4 | 1.269565 | ##### |  |
| 34 | 2 IT | 2020-13 | 2 IT-Northeast | 2 | 5 | #####    | ##### |  |
| 35 | 2 IT | 2020-13 | 2 IT-Northeast | 3 | 1 | 1.61915  | ##### |  |
| 36 | 2 IT | 2020-13 | 2 IT-Northeast | 3 | 2 | 2.269231 | ##### |  |
| 37 | 2 IT | 2020-13 | 2 IT-Northeast | 3 | 3 | 1.529412 | ##### |  |
| 38 | 2 IT | 2020-13 | 2 IT-Northeast | 3 | 4 | 1.5625   | ##### |  |
| 39 | 2 IT | 2020-13 | 2 IT-Northeast | 3 | 5 | 1.388889 | ##### |  |
| 40 | 2 IT | 2020-13 | 2 IT-Northwest | 1 | 1 | 1.506224 | ##### |  |
| 41 | 2 IT | 2020-13 | 2 IT-Northwest | 1 | 2 | 2.30149  | ##### |  |
| 42 | 2 IT | 2020-13 | 2 IT-Northwest | 1 | 3 | 1.506769 | ##### |  |
| 43 | 2 IT | 2020-13 | 2 IT-Northwest | 1 | 4 | 1.612007 | ##### |  |
| 44 | 2 IT | 2020-13 | 2 IT-Northwest | 1 | 5 | #####    | ##### |  |
| 45 | 2 IT | 2020-13 | 2 IT-Northwest | 2 | 1 | 1.484256 | ##### |  |
| 46 | 2 IT | 2020-13 | 2 IT-Northwest | 2 | 2 | 2.373333 | ##### |  |
| 47 | 2 IT | 2020-13 | 2 IT-Northwest | 2 | 3 | 1.609524 | ##### |  |
| 48 | 2 IT | 2020-13 | 2 IT-Northwest | 2 | 4 | 1.633588 | ##### |  |
| 49 | 2 IT | 2020-13 | 2 IT-Northwest | 2 | 5 | #####    | ##### |  |
| 50 | 2 IT | 2020-13 | 2 IT-Northwest | 3 | 1 | 1.536532 | ##### |  |
| 51 | 2 IT | 2020-13 | 2 IT-Northwest | 3 | 2 | 2.222222 | ##### |  |
| 52 | 2 IT | 2020-13 | 2 IT-Northwest | 3 | 3 | 1.392405 | ##### |  |
| 53 | 2 IT | 2020-13 | 2 IT-Northwest | 3 | 4 | 1.583333 | ##### |  |
| 54 | 2 IT | 2020-13 | 2 IT-Northwest | 3 | 5 | 1.125    | ##### |  |
| 55 | 2 IT | 2020-13 | 2 IT-Overall   | 1 | 1 | 1.576711 | ##### |  |
| 56 | 2 IT | 2020-13 | 2 IT-Overall   | 1 | 2 | 2.270442 | ##### |  |
| 57 | 2 IT | 2020-13 | 2 IT-Overall   | 1 | 3 | 1.708067 | ##### |  |
| 58 | 2 IT | 2020-13 | 2 IT-Overall   | 1 | 4 | 1.587596 | ##### |  |
| 59 | 2 IT | 2020-13 | 2 IT-Overall   | 1 |   |          |       |  |
| 60 | 2 IT | 2020-13 | 2 IT-Overall   | 1 |   |          |       |  |

|    |      |         |              |   |   |          |       |  |  |
|----|------|---------|--------------|---|---|----------|-------|--|--|
| 1  |      |         |              |   |   |          |       |  |  |
| 2  |      |         |              |   |   |          |       |  |  |
| 3  | 2 IT | 2020-13 | 2 IT-Overall | 1 | 5 | #####    | ##### |  |  |
| 4  | 2 IT | 2020-13 | 2 IT-Overall | 2 | 1 | 1.542423 | ##### |  |  |
| 5  | 2 IT | 2020-13 | 2 IT-Overall | 2 | 2 | 2.322261 | ##### |  |  |
| 6  | 2 IT | 2020-13 | 2 IT-Overall | 2 | 3 | 1.801459 | ##### |  |  |
| 7  | 2 IT | 2020-13 | 2 IT-Overall | 2 | 4 | 1.535206 | ##### |  |  |
| 8  | 2 IT | 2020-13 | 2 IT-Overall | 2 | 5 | #####    | ##### |  |  |
| 9  | 2 IT | 2020-13 | 2 IT-Overall | 3 | 1 | 1.620956 | ##### |  |  |
| 10 | 2 IT | 2020-13 | 2 IT-Overall | 3 | 2 | 2.216524 | ##### |  |  |
| 11 | 2 IT | 2020-13 | 2 IT-Overall | 3 | 3 | 1.603813 | ##### |  |  |
| 12 | 2 IT | 2020-13 | 2 IT-Overall | 3 | 4 | 1.657434 | ##### |  |  |
| 13 | 2 IT | 2020-13 | 2 IT-Overall | 3 | 5 | 1.149044 | ##### |  |  |
| 14 | 2 IT | 2020-13 | 2 IT-South   | 1 | 1 | 1.772481 | ##### |  |  |
| 15 | 2 IT | 2020-13 | 2 IT-South   | 1 | 2 | 2.23952  | ##### |  |  |
| 16 | 2 IT | 2020-13 | 2 IT-South   | 1 | 3 | 1.893367 | ##### |  |  |
| 17 | 2 IT | 2020-13 | 2 IT-South   | 1 | 4 | 1.869343 | ##### |  |  |
| 18 | 2 IT | 2020-13 | 2 IT-South   | 1 | 5 | 1.025513 | ##### |  |  |
| 19 | 2 IT | 2020-13 | 2 IT-South   | 2 | 1 | 1.766839 | ##### |  |  |
| 20 | 2 IT | 2020-13 | 2 IT-South   | 2 | 2 | 2.576923 | ##### |  |  |
| 21 | 2 IT | 2020-13 | 2 IT-South   | 2 | 3 | 1.976471 | ##### |  |  |
| 22 | 2 IT | 2020-13 | 2 IT-South   | 2 | 4 | 1.821429 | ##### |  |  |
| 23 | 2 IT | 2020-13 | 2 IT-South   | 2 | 5 | 0.875    | ##### |  |  |
| 24 | 2 IT | 2020-13 | 2 IT-South   | 3 | 1 | 1.779252 | ##### |  |  |
| 25 | 2 IT | 2020-13 | 2 IT-South   | 3 | 2 | 1.777778 | ##### |  |  |
| 26 | 2 IT | 2020-13 | 2 IT-South   | 3 | 3 | 1.820513 | ##### |  |  |
| 27 | 2 IT | 2020-13 | 2 IT-South   | 3 | 4 | 1.9375   | ##### |  |  |
| 28 | 2 IT | 2020-13 | 2 IT-South   | 3 | 5 | 1.285714 | ##### |  |  |
| 29 | 2 IT | 2020-13 | 3 IT-Central | 1 | 1 | 0        | 0     |  |  |
| 30 | 2 IT | 2020-13 | 3 IT-Central | 1 | 2 | 0        | 0     |  |  |
| 31 | 2 IT | 2020-13 | 3 IT-Central | 1 | 3 | 0        | 0     |  |  |
| 32 | 2 IT | 2020-13 | 3 IT-Central | 1 | 4 | 0        | 0     |  |  |
| 33 | 2 IT | 2020-13 | 3 IT-Central | 1 | 5 | 0        | 0     |  |  |
| 34 | 2 IT | 2020-13 | 3 IT-Central | 2 | 1 | 0        | 0     |  |  |
| 35 | 2 IT | 2020-13 | 3 IT-Central | 2 | 2 | 0        | 0     |  |  |
| 36 | 2 IT | 2020-13 | 3 IT-Central | 2 | 3 | 0        | 0     |  |  |
| 37 | 2 IT | 2020-13 | 3 IT-Central | 2 | 4 | 0        | 0     |  |  |
| 38 | 2 IT | 2020-13 | 3 IT-Central | 2 | 5 | 0        | 0     |  |  |
| 39 | 2 IT | 2020-13 | 3 IT-Central | 3 | 1 | 0        | 0     |  |  |
| 40 | 2 IT | 2020-13 | 3 IT-Central | 3 | 2 | 0        | 0     |  |  |
| 41 | 2 IT | 2020-13 | 3 IT-Central | 3 | 3 | 0        | 0     |  |  |
| 42 | 2 IT | 2020-13 | 3 IT-Central | 3 | 4 | 0        | 0     |  |  |
| 43 | 2 IT | 2020-13 | 3 IT-Central | 3 | 5 | 0        | 0     |  |  |
| 44 | 2 IT | 2020-13 | 3 IT-Insular | 1 | 1 | 0        | 0     |  |  |
| 45 | 2 IT | 2020-13 | 3 IT-Insular | 1 | 2 | 0        | 0     |  |  |
| 46 | 2 IT | 2020-13 | 3 IT-Insular | 1 | 3 | 0        | 0     |  |  |
| 47 | 2 IT | 2020-13 | 3 IT-Insular | 1 | 4 | 0        | 0     |  |  |
| 48 | 2 IT | 2020-13 | 3 IT-Insular | 1 | 5 | 0        | 0     |  |  |
| 49 | 2 IT | 2020-13 | 3 IT-Insular | 2 | 1 | 0        | 0     |  |  |
| 50 | 2 IT | 2020-13 | 3 IT-Insular | 2 | 2 | 0        | 0     |  |  |
| 51 | 2 IT | 2020-13 | 3 IT-Insular | 2 | 3 | 0        | 0     |  |  |
| 52 | 2 IT | 2020-13 | 3 IT-Insular | 2 | 4 | 0        | 0     |  |  |
| 53 | 2 IT | 2020-13 | 3 IT-Insular | 2 | 5 | 0        | 0     |  |  |
| 54 | 2 IT | 2020-13 | 3 IT-Insular | 3 | 1 | 0        | 0     |  |  |
| 55 | 2 IT | 2020-13 | 3 IT-Insular | 3 | 2 | 0        | 0     |  |  |
| 56 | 2 IT | 2020-13 | 3 IT-Insular | 3 | 3 | 0        | 0     |  |  |
| 57 | 2 IT | 2020-13 | 3 IT-Insular | 3 | 4 | 0        | 0     |  |  |
| 58 | 2 IT | 2020-13 | 3 IT-Insular | 3 | 5 | 0        | 0     |  |  |
| 59 | 2 IT | 2020-13 | 3 IT-Insular | 3 | 5 | 0        | 0     |  |  |
| 60 | 2 IT | 2020-13 | 3 IT-Insular | 3 | 5 | 0        | 0     |  |  |

|    |      |         |                |   |   |   |   |
|----|------|---------|----------------|---|---|---|---|
| 1  |      |         |                |   |   |   |   |
| 2  |      |         |                |   |   |   |   |
| 3  | 2 IT | 2020-13 | 3 IT-Northeast | 1 | 1 | 0 | 0 |
| 4  | 2 IT | 2020-13 | 3 IT-Northeast | 1 | 2 | 0 | 0 |
| 5  | 2 IT | 2020-13 | 3 IT-Northeast | 1 | 3 | 0 | 0 |
| 6  | 2 IT | 2020-13 | 3 IT-Northeast | 1 | 4 | 0 | 0 |
| 7  | 2 IT | 2020-13 | 3 IT-Northeast | 1 | 5 | 0 | 0 |
| 8  | 2 IT | 2020-13 | 3 IT-Northeast | 2 | 1 | 0 | 0 |
| 9  | 2 IT | 2020-13 | 3 IT-Northeast | 2 | 2 | 0 | 0 |
| 10 | 2 IT | 2020-13 | 3 IT-Northeast | 2 | 3 | 0 | 0 |
| 11 | 2 IT | 2020-13 | 3 IT-Northeast | 2 | 4 | 0 | 0 |
| 12 | 2 IT | 2020-13 | 3 IT-Northeast | 2 | 5 | 0 | 0 |
| 13 | 2 IT | 2020-13 | 3 IT-Northeast | 3 | 1 | 0 | 0 |
| 14 | 2 IT | 2020-13 | 3 IT-Northeast | 3 | 2 | 0 | 0 |
| 15 | 2 IT | 2020-13 | 3 IT-Northeast | 3 | 3 | 0 | 0 |
| 16 | 2 IT | 2020-13 | 3 IT-Northeast | 3 | 4 | 0 | 0 |
| 17 | 2 IT | 2020-13 | 3 IT-Northeast | 3 | 5 | 0 | 0 |
| 18 | 2 IT | 2020-13 | 3 IT-Northeast | 3 | 5 | 0 | 0 |
| 19 | 2 IT | 2020-13 | 3 IT-Northeast | 1 | 1 | 0 | 0 |
| 20 | 2 IT | 2020-13 | 3 IT-Northeast | 1 | 2 | 0 | 0 |
| 21 | 2 IT | 2020-13 | 3 IT-Northeast | 1 | 3 | 0 | 0 |
| 22 | 2 IT | 2020-13 | 3 IT-Northeast | 1 | 4 | 0 | 0 |
| 23 | 2 IT | 2020-13 | 3 IT-Northeast | 1 | 5 | 0 | 0 |
| 24 | 2 IT | 2020-13 | 3 IT-Northeast | 2 | 1 | 0 | 0 |
| 25 | 2 IT | 2020-13 | 3 IT-Northeast | 2 | 2 | 0 | 0 |
| 26 | 2 IT | 2020-13 | 3 IT-Northeast | 2 | 3 | 0 | 0 |
| 27 | 2 IT | 2020-13 | 3 IT-Northeast | 2 | 4 | 0 | 0 |
| 28 | 2 IT | 2020-13 | 3 IT-Northeast | 2 | 5 | 0 | 0 |
| 29 | 2 IT | 2020-13 | 3 IT-Northeast | 3 | 1 | 0 | 0 |
| 30 | 2 IT | 2020-13 | 3 IT-Northeast | 3 | 2 | 0 | 0 |
| 31 | 2 IT | 2020-13 | 3 IT-Northeast | 3 | 3 | 0 | 0 |
| 32 | 2 IT | 2020-13 | 3 IT-Northeast | 3 | 4 | 0 | 0 |
| 33 | 2 IT | 2020-13 | 3 IT-Northeast | 3 | 5 | 0 | 0 |
| 34 | 2 IT | 2020-13 | 3 IT-Overall   | 1 | 1 | 0 | 0 |
| 35 | 2 IT | 2020-13 | 3 IT-Overall   | 1 | 2 | 0 | 0 |
| 36 | 2 IT | 2020-13 | 3 IT-Overall   | 1 | 3 | 0 | 0 |
| 37 | 2 IT | 2020-13 | 3 IT-Overall   | 1 | 4 | 0 | 0 |
| 38 | 2 IT | 2020-13 | 3 IT-Overall   | 1 | 5 | 0 | 0 |
| 39 | 2 IT | 2020-13 | 3 IT-Overall   | 2 | 1 | 0 | 0 |
| 40 | 2 IT | 2020-13 | 3 IT-Overall   | 2 | 2 | 0 | 0 |
| 41 | 2 IT | 2020-13 | 3 IT-Overall   | 2 | 3 | 0 | 0 |
| 42 | 2 IT | 2020-13 | 3 IT-Overall   | 2 | 4 | 0 | 0 |
| 43 | 2 IT | 2020-13 | 3 IT-Overall   | 2 | 5 | 0 | 0 |
| 44 | 2 IT | 2020-13 | 3 IT-Overall   | 3 | 1 | 0 | 0 |
| 45 | 2 IT | 2020-13 | 3 IT-Overall   | 3 | 2 | 0 | 0 |
| 46 | 2 IT | 2020-13 | 3 IT-Overall   | 3 | 3 | 0 | 0 |
| 47 | 2 IT | 2020-13 | 3 IT-Overall   | 3 | 4 | 0 | 0 |
| 48 | 2 IT | 2020-13 | 3 IT-Overall   | 3 | 5 | 0 | 0 |
| 49 | 2 IT | 2020-13 | 3 IT-South     | 1 | 1 | 0 | 0 |
| 50 | 2 IT | 2020-13 | 3 IT-South     | 1 | 2 | 0 | 0 |
| 51 | 2 IT | 2020-13 | 3 IT-South     | 1 | 3 | 0 | 0 |
| 52 | 2 IT | 2020-13 | 3 IT-South     | 1 | 4 | 0 | 0 |
| 53 | 2 IT | 2020-13 | 3 IT-South     | 1 | 5 | 0 | 0 |
| 54 | 2 IT | 2020-13 | 3 IT-South     | 2 | 1 | 0 | 0 |
| 55 | 2 IT | 2020-13 | 3 IT-South     | 2 | 2 | 0 | 0 |
| 56 | 2 IT | 2020-13 | 3 IT-South     | 2 | 3 | 0 | 0 |
| 57 | 2 IT | 2020-13 | 3 IT-South     | 2 | 4 | 0 | 0 |
| 58 | 2 IT | 2020-13 | 3 IT-South     | 2 | 5 | 0 | 0 |
| 59 | 2 IT | 2020-13 | 3 IT-South     | 2 | 5 | 0 | 0 |
| 60 | 2 IT | 2020-13 | 3 IT-South     | 3 | 1 | 0 | 0 |

|    |      |         |                |   |   |          |          |  |
|----|------|---------|----------------|---|---|----------|----------|--|
| 1  |      |         |                |   |   |          |          |  |
| 2  |      |         |                |   |   |          |          |  |
| 3  | 2 IT | 2020-13 | 3 IT-South     | 3 | 2 | 0        | 0        |  |
| 4  | 2 IT | 2020-13 | 3 IT-South     | 3 | 3 | 0        | 0        |  |
| 5  | 2 IT | 2020-13 | 3 IT-South     | 3 | 4 | 0        | 0        |  |
| 6  | 2 IT | 2020-13 | 3 IT-South     | 3 | 5 | 0        | 0        |  |
| 7  | 2 IT | 2020-13 | 4 IT-Central   | 1 | 1 | #####    | #####    |  |
| 8  | 2 IT | 2020-13 | 4 IT-Central   | 1 | 2 | #####    | #####    |  |
| 9  | 2 IT | 2020-13 | 4 IT-Central   | 1 | 3 | 1.519217 | #####    |  |
| 10 | 2 IT | 2020-13 | 4 IT-Central   | 1 | 4 | #####    | #####    |  |
| 11 | 2 IT | 2020-13 | 4 IT-Central   | 1 | 5 | 0        | 0        |  |
| 12 | 2 IT | 2020-13 | 4 IT-Central   | 2 | 1 | #####    | #####    |  |
| 13 | 2 IT | 2020-13 | 4 IT-Central   | 2 | 2 | #####    | #####    |  |
| 14 | 2 IT | 2020-13 | 4 IT-Central   | 2 | 3 | #####    | #####    |  |
| 15 | 2 IT | 2020-13 | 4 IT-Central   | 2 | 4 | #####    | #####    |  |
| 16 | 2 IT | 2020-13 | 4 IT-Central   | 2 | 5 | 0        | 0        |  |
| 17 | 2 IT | 2020-13 | 4 IT-Central   | 3 | 1 | 1.107135 | #####    |  |
| 18 | 2 IT | 2020-13 | 4 IT-Central   | 3 | 2 | 0.52     | #####    |  |
| 19 | 2 IT | 2020-13 | 4 IT-Central   | 3 | 3 | 2.833333 | #####    |  |
| 20 | 2 IT | 2020-13 | 4 IT-Central   | 3 | 4 | 1.055556 | #####    |  |
| 21 | 2 IT | 2020-13 | 4 IT-Central   | 3 | 5 | 0        | 0        |  |
| 22 | 2 IT | 2020-13 | 4 IT-Central   | 3 | 5 | 0        | 0        |  |
| 23 | 2 IT | 2020-13 | 4 IT-Insular   | 1 | 1 | #####    | #####    |  |
| 24 | 2 IT | 2020-13 | 4 IT-Insular   | 1 | 2 | 1.447088 | 1.373876 |  |
| 25 | 2 IT | 2020-13 | 4 IT-Insular   | 1 | 3 | #####    | #####    |  |
| 26 | 2 IT | 2020-13 | 4 IT-Insular   | 1 | 4 | #####    | #####    |  |
| 27 | 2 IT | 2020-13 | 4 IT-Insular   | 1 | 5 | #####    | #####    |  |
| 28 | 2 IT | 2020-13 | 4 IT-Insular   | 2 | 1 | #####    | #####    |  |
| 29 | 2 IT | 2020-13 | 4 IT-Insular   | 2 | 2 | 0        | 0        |  |
| 30 | 2 IT | 2020-13 | 4 IT-Insular   | 2 | 3 | #####    | #####    |  |
| 31 | 2 IT | 2020-13 | 4 IT-Insular   | 2 | 4 | #####    | #####    |  |
| 32 | 2 IT | 2020-13 | 4 IT-Insular   | 2 | 5 | #####    | #####    |  |
| 33 | 2 IT | 2020-13 | 4 IT-Insular   | 3 | 1 | #####    | #####    |  |
| 34 | 2 IT | 2020-13 | 4 IT-Insular   | 3 | 2 | 3.333333 | 3.043101 |  |
| 35 | 2 IT | 2020-13 | 4 IT-Insular   | 3 | 3 | #####    | #####    |  |
| 36 | 2 IT | 2020-13 | 4 IT-Insular   | 3 | 4 | 0        | 0        |  |
| 37 | 2 IT | 2020-13 | 4 IT-Insular   | 3 | 5 | 0        | 0        |  |
| 38 | 2 IT | 2020-13 | 4 IT-Northeast | 1 | 1 | #####    | #####    |  |
| 39 | 2 IT | 2020-13 | 4 IT-Northeast | 1 | 2 | #####    | #####    |  |
| 40 | 2 IT | 2020-13 | 4 IT-Northeast | 1 | 3 | 1.546788 | #####    |  |
| 41 | 2 IT | 2020-13 | 4 IT-Northeast | 1 | 4 | 1.014712 | #####    |  |
| 42 | 2 IT | 2020-13 | 4 IT-Northeast | 1 | 5 | #####    | #####    |  |
| 43 | 2 IT | 2020-13 | 4 IT-Northeast | 2 | 1 | 1.113168 | #####    |  |
| 44 | 2 IT | 2020-13 | 4 IT-Northeast | 2 | 2 | #####    | #####    |  |
| 45 | 2 IT | 2020-13 | 4 IT-Northeast | 2 | 3 | 1.493243 | #####    |  |
| 46 | 2 IT | 2020-13 | 4 IT-Northeast | 2 | 4 | 1.495652 | #####    |  |
| 47 | 2 IT | 2020-13 | 4 IT-Northeast | 2 | 5 | #####    | #####    |  |
| 48 | 2 IT | 2020-13 | 4 IT-Northeast | 3 | 1 | #####    | #####    |  |
| 49 | 2 IT | 2020-13 | 4 IT-Northeast | 3 | 2 | 1.037037 | #####    |  |
| 50 | 2 IT | 2020-13 | 4 IT-Northeast | 3 | 3 | 1.61194  | #####    |  |
| 51 | 2 IT | 2020-13 | 4 IT-Northeast | 3 | 4 | #####    | #####    |  |
| 52 | 2 IT | 2020-13 | 4 IT-Northeast | 3 | 5 | 0        | 0        |  |
| 53 | 2 IT | 2020-13 | 4 IT-Northwest | 1 | 1 | #####    | #####    |  |
| 54 | 2 IT | 2020-13 | 4 IT-Northwest | 1 | 2 | #####    | #####    |  |
| 55 | 2 IT | 2020-13 | 4 IT-Northwest | 1 | 3 | 1.880995 | #####    |  |
| 56 | 2 IT | 2020-13 | 4 IT-Northwest | 1 | 4 | #####    | #####    |  |
| 57 | 2 IT | 2020-13 | 4 IT-Northwest | 1 | 5 | #####    | #####    |  |
| 58 | 2 IT | 2020-13 | 4 IT-Northwest | 2 | 1 | #####    | #####    |  |
| 59 | 2 IT | 2020-13 | 4 IT-Northwest | 2 | 2 | #####    | #####    |  |
| 60 | 2 IT | 2020-13 | 4 IT-Northwest | 2 | 2 | #####    | #####    |  |

|    |      |         |              |   |   |          |       |  |
|----|------|---------|--------------|---|---|----------|-------|--|
| 1  |      |         |              |   |   |          |       |  |
| 2  |      |         |              |   |   |          |       |  |
| 3  | 2 IT | 2020-13 | 4 IT-Northwe | 2 | 3 | 1.246512 | ##### |  |
| 4  | 2 IT | 2020-13 | 4 IT-Northwe | 2 | 4 | #####    | ##### |  |
| 5  | 2 IT | 2020-13 | 4 IT-Northwe | 2 | 5 | 0.2      | ##### |  |
| 6  | 2 IT | 2020-13 | 4 IT-Northwe | 3 | 1 | 1.492441 | ##### |  |
| 7  | 2 IT | 2020-13 | 4 IT-Northwe | 3 | 2 | #####    | ##### |  |
| 8  | 2 IT | 2020-13 | 4 IT-Northwe | 3 | 3 | 2.552941 | ##### |  |
| 9  | 2 IT | 2020-13 | 4 IT-Northwe | 3 | 4 | 1.453125 | ##### |  |
| 10 | 2 IT | 2020-13 | 4 IT-Northwe | 3 | 5 | 0        | 0     |  |
| 11 | 2 IT | 2020-13 | 4 IT-Overall | 1 | 1 | #####    | ##### |  |
| 12 | 2 IT | 2020-13 | 4 IT-Overall | 1 | 2 | #####    | ##### |  |
| 13 | 2 IT | 2020-13 | 4 IT-Overall | 1 | 3 | 1.295162 | ##### |  |
| 14 | 2 IT | 2020-13 | 4 IT-Overall | 1 | 4 | #####    | ##### |  |
| 15 | 2 IT | 2020-13 | 4 IT-Overall | 1 | 5 | #####    | ##### |  |
| 16 | 2 IT | 2020-13 | 4 IT-Overall | 2 | 1 | #####    | ##### |  |
| 17 | 2 IT | 2020-13 | 4 IT-Overall | 2 | 2 | #####    | ##### |  |
| 18 | 2 IT | 2020-13 | 4 IT-Overall | 2 | 3 | #####    | ##### |  |
| 19 | 2 IT | 2020-13 | 4 IT-Overall | 2 | 4 | #####    | ##### |  |
| 20 | 2 IT | 2020-13 | 4 IT-Overall | 2 | 5 | #####    | ##### |  |
| 21 | 2 IT | 2020-13 | 4 IT-Overall | 3 | 1 | #####    | ##### |  |
| 22 | 2 IT | 2020-13 | 4 IT-Overall | 3 | 2 | #####    | ##### |  |
| 23 | 2 IT | 2020-13 | 4 IT-Overall | 3 | 3 | 1.652397 | ##### |  |
| 24 | 2 IT | 2020-13 | 4 IT-Overall | 3 | 4 | #####    | ##### |  |
| 25 | 2 IT | 2020-13 | 4 IT-Overall | 3 | 5 | 0        | 0     |  |
| 26 | 2 IT | 2020-13 | 4 IT-Overall | 3 | 5 | 0        | 0     |  |
| 27 | 2 IT | 2020-13 | 4 IT-South   | 1 | 1 | #####    | ##### |  |
| 28 | 2 IT | 2020-13 | 4 IT-South   | 1 | 2 | #####    | ##### |  |
| 29 | 2 IT | 2020-13 | 4 IT-South   | 1 | 3 | #####    | ##### |  |
| 30 | 2 IT | 2020-13 | 4 IT-South   | 1 | 4 | #####    | ##### |  |
| 31 | 2 IT | 2020-13 | 4 IT-South   | 1 | 5 | 0        | 0     |  |
| 32 | 2 IT | 2020-13 | 4 IT-South   | 2 | 1 | #####    | ##### |  |
| 33 | 2 IT | 2020-13 | 4 IT-South   | 2 | 2 | #####    | ##### |  |
| 34 | 2 IT | 2020-13 | 4 IT-South   | 2 | 3 | #####    | ##### |  |
| 35 | 2 IT | 2020-13 | 4 IT-South   | 2 | 4 | #####    | ##### |  |
| 36 | 2 IT | 2020-13 | 4 IT-South   | 2 | 5 | 0        | 0     |  |
| 37 | 2 IT | 2020-13 | 4 IT-South   | 3 | 1 | #####    | ##### |  |
| 38 | 2 IT | 2020-13 | 4 IT-South   | 3 | 2 | 0        | 0     |  |
| 39 | 2 IT | 2020-13 | 4 IT-South   | 3 | 3 | 0.7      | ##### |  |
| 40 | 2 IT | 2020-13 | 4 IT-South   | 3 | 4 | 0        | 0     |  |
| 41 | 2 IT | 2020-13 | 4 IT-South   | 3 | 5 | 0        | 0     |  |
| 42 | 2 IT | 2020-13 | 5 IT-Central | 1 | 1 | #####    | ##### |  |
| 43 | 2 IT | 2020-13 | 5 IT-Central | 1 | 2 | #####    | ##### |  |
| 44 | 2 IT | 2020-13 | 5 IT-Central | 1 | 3 | #####    | ##### |  |
| 45 | 2 IT | 2020-13 | 5 IT-Central | 1 | 4 | #####    | ##### |  |
| 46 | 2 IT | 2020-13 | 5 IT-Central | 1 | 5 | #####    | ##### |  |
| 47 | 2 IT | 2020-13 | 5 IT-Central | 2 | 1 | #####    | ##### |  |
| 48 | 2 IT | 2020-13 | 5 IT-Central | 2 | 2 | 0.2      | ##### |  |
| 49 | 2 IT | 2020-13 | 5 IT-Central | 2 | 3 | 0.464    | ##### |  |
| 50 | 2 IT | 2020-13 | 5 IT-Central | 2 | 4 | #####    | ##### |  |
| 51 | 2 IT | 2020-13 | 5 IT-Central | 2 | 5 | #####    | ##### |  |
| 52 | 2 IT | 2020-13 | 5 IT-Central | 3 | 1 | #####    | ##### |  |
| 53 | 2 IT | 2020-13 | 5 IT-Central | 3 | 2 | 0.28     | ##### |  |
| 54 | 2 IT | 2020-13 | 5 IT-Central | 3 | 3 | #####    | ##### |  |
| 55 | 2 IT | 2020-13 | 5 IT-Central | 3 | 4 | #####    | ##### |  |
| 56 | 2 IT | 2020-13 | 5 IT-Central | 3 | 5 | 0.45     | ##### |  |
| 57 | 2 IT | 2020-13 | 5 IT-Central | 3 | 5 | 0.45     | ##### |  |
| 58 | 2 IT | 2020-13 | 5 IT-Insular | 1 | 1 | #####    | ##### |  |
| 59 | 2 IT | 2020-13 | 5 IT-Insular | 1 | 2 | #####    | ##### |  |
| 60 | 2 IT | 2020-13 | 5 IT-Insular | 1 | 3 | #####    | ##### |  |

1  
2  
3  
4  
5  
6  
7  
8  
9  
10  
11  
12  
13  
14  
15  
16  
17  
18  
19  
20  
21  
22  
23  
24  
25  
26  
27  
28  
29  
30  
31  
32  
33  
34  
35  
36  
37  
38  
39  
40  
41  
42  
43  
44  
45  
46  
47  
48  
49  
50  
51  
52  
53  
54  
55  
56  
57  
58  
59  
60

|      |         |                |   |   |          |       |
|------|---------|----------------|---|---|----------|-------|
| 2 IT | 2020-13 | 5 IT-Insular   | 1 | 4 | #####    | ##### |
| 2 IT | 2020-13 | 5 IT-Insular   | 1 | 5 | #####    | ##### |
| 2 IT | 2020-13 | 5 IT-Insular   | 2 | 1 | #####    | ##### |
| 2 IT | 2020-13 | 5 IT-Insular   | 2 | 2 | #####    | ##### |
| 2 IT | 2020-13 | 5 IT-Insular   | 2 | 3 | #####    | ##### |
| 2 IT | 2020-13 | 5 IT-Insular   | 2 | 4 | #####    | ##### |
| 2 IT | 2020-13 | 5 IT-Insular   | 2 | 5 | 0.8      | ##### |
| 2 IT | 2020-13 | 5 IT-Insular   | 3 | 1 | #####    | ##### |
| 2 IT | 2020-13 | 5 IT-Insular   | 3 | 2 | 0.5      | ##### |
| 2 IT | 2020-13 | 5 IT-Insular   | 3 | 3 | #####    | ##### |
| 2 IT | 2020-13 | 5 IT-Insular   | 3 | 4 | 1.444444 | ##### |
| 2 IT | 2020-13 | 5 IT-Insular   | 3 | 5 | 0        | 0     |
| 2 IT | 2020-13 | 5 IT-Northeast | 1 | 1 | #####    | ##### |
| 2 IT | 2020-13 | 5 IT-Northeast | 1 | 2 | #####    | ##### |
| 2 IT | 2020-13 | 5 IT-Northeast | 1 | 3 | #####    | ##### |
| 2 IT | 2020-13 | 5 IT-Northeast | 1 | 4 | #####    | ##### |
| 2 IT | 2020-13 | 5 IT-Northeast | 1 | 5 | #####    | ##### |
| 2 IT | 2020-13 | 5 IT-Northeast | 2 | 1 | #####    | ##### |
| 2 IT | 2020-13 | 5 IT-Northeast | 2 | 2 | #####    | ##### |
| 2 IT | 2020-13 | 5 IT-Northeast | 2 | 3 | #####    | ##### |
| 2 IT | 2020-13 | 5 IT-Northeast | 2 | 4 | #####    | ##### |
| 2 IT | 2020-13 | 5 IT-Northeast | 2 | 5 | #####    | ##### |
| 2 IT | 2020-13 | 5 IT-Northeast | 3 | 1 | #####    | ##### |
| 2 IT | 2020-13 | 5 IT-Northeast | 3 | 2 | #####    | ##### |
| 2 IT | 2020-13 | 5 IT-Northeast | 3 | 3 | #####    | ##### |
| 2 IT | 2020-13 | 5 IT-Northeast | 3 | 4 | #####    | ##### |
| 2 IT | 2020-13 | 5 IT-Northeast | 3 | 5 | #####    | ##### |
| 2 IT | 2020-13 | 5 IT-Northwest | 1 | 1 | #####    | ##### |
| 2 IT | 2020-13 | 5 IT-Northwest | 1 | 2 | #####    | ##### |
| 2 IT | 2020-13 | 5 IT-Northwest | 1 | 3 | #####    | ##### |
| 2 IT | 2020-13 | 5 IT-Northwest | 1 | 4 | #####    | ##### |
| 2 IT | 2020-13 | 5 IT-Northwest | 1 | 5 | #####    | ##### |
| 2 IT | 2020-13 | 5 IT-Northwest | 2 | 1 | #####    | ##### |
| 2 IT | 2020-13 | 5 IT-Northwest | 2 | 2 | #####    | ##### |
| 2 IT | 2020-13 | 5 IT-Northwest | 2 | 3 | #####    | ##### |
| 2 IT | 2020-13 | 5 IT-Northwest | 2 | 4 | #####    | ##### |
| 2 IT | 2020-13 | 5 IT-Northwest | 2 | 5 | #####    | ##### |
| 2 IT | 2020-13 | 5 IT-Northwest | 3 | 1 | #####    | ##### |
| 2 IT | 2020-13 | 5 IT-Northwest | 3 | 2 | #####    | ##### |
| 2 IT | 2020-13 | 5 IT-Northwest | 3 | 3 | #####    | ##### |
| 2 IT | 2020-13 | 5 IT-Northwest | 3 | 4 | #####    | ##### |
| 2 IT | 2020-13 | 5 IT-Northwest | 3 | 5 | 0.5625   | ##### |
| 2 IT | 2020-13 | 5 IT-Overall   | 1 | 1 | #####    | ##### |
| 2 IT | 2020-13 | 5 IT-Overall   | 1 | 2 | #####    | ##### |
| 2 IT | 2020-13 | 5 IT-Overall   | 1 | 3 | #####    | ##### |
| 2 IT | 2020-13 | 5 IT-Overall   | 1 | 4 | #####    | ##### |
| 2 IT | 2020-13 | 5 IT-Overall   | 1 | 5 | #####    | ##### |
| 2 IT | 2020-13 | 5 IT-Overall   | 2 | 1 | #####    | ##### |
| 2 IT | 2020-13 | 5 IT-Overall   | 2 | 2 | #####    | ##### |
| 2 IT | 2020-13 | 5 IT-Overall   | 2 | 3 | #####    | ##### |
| 2 IT | 2020-13 | 5 IT-Overall   | 2 | 4 | #####    | ##### |
| 2 IT | 2020-13 | 5 IT-Overall   | 2 | 5 | #####    | ##### |
| 2 IT | 2020-13 | 5 IT-Overall   | 3 | 1 | #####    | ##### |
| 2 IT | 2020-13 | 5 IT-Overall   | 3 | 2 | #####    | ##### |
| 2 IT | 2020-13 | 5 IT-Overall   | 3 | 3 | #####    | ##### |
| 2 IT | 2020-13 | 5 IT-Overall   | 3 | 4 | #####    | ##### |

|    |      |         |                |   |   |          |          |
|----|------|---------|----------------|---|---|----------|----------|
| 1  |      |         |                |   |   |          |          |
| 2  |      |         |                |   |   |          |          |
| 3  | 2 IT | 2020-13 | 5 IT-Overall   | 3 | 5 | #####    | #####    |
| 4  | 2 IT | 2020-13 | 5 IT-South     | 1 | 1 | #####    | #####    |
| 5  | 2 IT | 2020-13 | 5 IT-South     | 1 | 2 | #####    | #####    |
| 6  | 2 IT | 2020-13 | 5 IT-South     | 1 | 3 | #####    | #####    |
| 7  | 2 IT | 2020-13 | 5 IT-South     | 1 | 4 | #####    | #####    |
| 8  | 2 IT | 2020-13 | 5 IT-South     | 1 | 5 | #####    | #####    |
| 9  | 2 IT | 2020-13 | 5 IT-South     | 2 | 1 | #####    | #####    |
| 10 | 2 IT | 2020-13 | 5 IT-South     | 2 | 2 | #####    | #####    |
| 11 | 2 IT | 2020-13 | 5 IT-South     | 2 | 3 | #####    | #####    |
| 12 | 2 IT | 2020-13 | 5 IT-South     | 2 | 4 | #####    | #####    |
| 13 | 2 IT | 2020-13 | 5 IT-South     | 2 | 5 | 0.125    | #####    |
| 14 | 2 IT | 2020-13 | 5 IT-South     | 3 | 1 | #####    | #####    |
| 15 | 2 IT | 2020-13 | 5 IT-South     | 3 | 2 | #####    | #####    |
| 16 | 2 IT | 2020-13 | 5 IT-South     | 3 | 3 | 0.375    | #####    |
| 17 | 2 IT | 2020-13 | 5 IT-South     | 3 | 4 | 0.6875   | #####    |
| 18 | 2 IT | 2020-13 | 5 IT-South     | 3 | 5 | #####    | #####    |
| 19 | 2 IT | 2020-14 | 1 IT-Central   | 1 | 1 | 2.922157 | #####    |
| 20 | 2 IT | 2020-14 | 1 IT-Central   | 1 | 2 | 3.229585 | #####    |
| 21 | 2 IT | 2020-14 | 1 IT-Central   | 1 | 3 | 3.200657 | #####    |
| 22 | 2 IT | 2020-14 | 1 IT-Central   | 1 | 4 | 3.144645 | #####    |
| 23 | 2 IT | 2020-14 | 1 IT-Central   | 1 | 5 | 1.883234 | #####    |
| 24 | 2 IT | 2020-14 | 1 IT-Central   | 2 | 1 | 2.488799 | #####    |
| 25 | 2 IT | 2020-14 | 1 IT-Central   | 2 | 2 | 2.291667 | #####    |
| 26 | 2 IT | 2020-14 | 1 IT-Central   | 2 | 3 | 3.074074 | #####    |
| 27 | 2 IT | 2020-14 | 1 IT-Central   | 2 | 4 | 2.911111 | #####    |
| 28 | 2 IT | 2020-14 | 1 IT-Central   | 2 | 5 | 1.380952 | #####    |
| 29 | 2 IT | 2020-14 | 1 IT-Central   | 3 | 1 | 3.517579 | #####    |
| 30 | 2 IT | 2020-14 | 1 IT-Central   | 3 | 2 | 3.923077 | #####    |
| 31 | 2 IT | 2020-14 | 1 IT-Central   | 3 | 3 | 3.333333 | #####    |
| 32 | 2 IT | 2020-14 | 1 IT-Central   | 3 | 4 | 3.473684 | 1.346815 |
| 33 | 2 IT | 2020-14 | 1 IT-Central   | 3 | 5 | 3.75     | 1.243815 |
| 34 | 2 IT | 2020-14 | 1 IT-Insular   | 1 | 1 | 3.028993 | #####    |
| 35 | 2 IT | 2020-14 | 1 IT-Insular   | 1 | 2 | 2.30205  | #####    |
| 36 | 2 IT | 2020-14 | 1 IT-Insular   | 1 | 3 | 4.587888 | 1.095422 |
| 37 | 2 IT | 2020-14 | 1 IT-Insular   | 1 | 4 | 2.323951 | #####    |
| 38 | 2 IT | 2020-14 | 1 IT-Insular   | 1 | 5 | 1        | 0        |
| 39 | 2 IT | 2020-14 | 1 IT-Insular   | 2 | 1 | 2.593279 | #####    |
| 40 | 2 IT | 2020-14 | 1 IT-Insular   | 2 | 2 | 2        | #####    |
| 41 | 2 IT | 2020-14 | 1 IT-Insular   | 2 | 3 | 4        | #####    |
| 42 | 2 IT | 2020-14 | 1 IT-Insular   | 2 | 4 | 1.733333 | #####    |
| 43 | 2 IT | 2020-14 | 1 IT-Insular   | 2 | 5 | 1        | 0        |
| 44 | 2 IT | 2020-14 | 1 IT-Insular   | 3 | 1 | 3.865619 | 1.214888 |
| 45 | 2 IT | 2020-14 | 1 IT-Insular   | 3 | 2 | 3        | #####    |
| 46 | 2 IT | 2020-14 | 1 IT-Insular   | 3 | 3 | 6.25     | 3.228503 |
| 47 | 2 IT | 2020-14 | 1 IT-Insular   | 3 | 4 | 3        | 1.2473   |
| 48 | 2 IT | 2020-14 | 1 IT-Northeast | 1 | 1 | 2.607905 | #####    |
| 49 | 2 IT | 2020-14 | 1 IT-Northeast | 1 | 2 | 3.117752 | #####    |
| 50 | 2 IT | 2020-14 | 1 IT-Northeast | 1 | 3 | 3.046393 | #####    |
| 51 | 2 IT | 2020-14 | 1 IT-Northeast | 1 | 4 | 2.688838 | #####    |
| 52 | 2 IT | 2020-14 | 1 IT-Northeast | 1 | 5 | 1.845331 | #####    |
| 53 | 2 IT | 2020-14 | 1 IT-Northeast | 2 | 1 | 2.703174 | #####    |
| 54 | 2 IT | 2020-14 | 1 IT-Northeast | 2 | 2 | 2.717949 | #####    |
| 55 | 2 IT | 2020-14 | 1 IT-Northeast | 2 | 3 | 3.757576 | #####    |
| 56 | 2 IT | 2020-14 | 1 IT-Northeast | 2 | 4 | 2.755556 | #####    |
| 57 | 2 IT | 2020-14 | 1 IT-Northeast | 2 | 5 | 1.555556 | #####    |
| 58 | 2 IT | 2020-14 | 1 IT-Northeast | 3 | 1 | 2.513071 | #####    |
| 59 | 2 IT | 2020-14 | 1 IT-Northeast | 3 |   |          |          |
| 60 | 2 IT | 2020-14 | 1 IT-Northeast | 3 |   |          |          |

1  
2  
3  
4  
5  
6  
7  
8  
9  
10  
11  
12  
13  
14  
15  
16  
17  
18  
19  
20  
21  
22  
23  
24  
25  
26  
27  
28  
29  
30  
31  
32  
33  
34  
35  
36  
37  
38  
39  
40  
41  
42  
43  
44  
45  
46  
47  
48  
49  
50  
51  
52  
53  
54  
55  
56  
57  
58  
59  
60

|      |         |                |   |   |          |       |
|------|---------|----------------|---|---|----------|-------|
| 2 IT | 2020-14 | 1 IT-Northeast | 3 | 2 | 3.5      | ##### |
| 2 IT | 2020-14 | 1 IT-Northeast | 3 | 3 | 2.4      | ##### |
| 2 IT | 2020-14 | 1 IT-Northeast | 3 | 4 | 2.608696 | ##### |
| 2 IT | 2020-14 | 1 IT-Northeast | 3 | 5 | 2.111111 | ##### |
| 2 IT | 2020-14 | 1 IT-Northwest | 1 | 1 | 2.534727 | ##### |
| 2 IT | 2020-14 | 1 IT-Northwest | 1 | 2 | 2.82344  | ##### |
| 2 IT | 2020-14 | 1 IT-Northwest | 1 | 3 | 3.152054 | ##### |
| 2 IT | 2020-14 | 1 IT-Northwest | 1 | 4 | 2.484523 | ##### |
| 2 IT | 2020-14 | 1 IT-Northwest | 1 | 5 | 1.606403 | ##### |
| 2 IT | 2020-14 | 1 IT-Northwest | 2 | 1 | 2.396712 | ##### |
| 2 IT | 2020-14 | 1 IT-Northwest | 2 | 2 | 3.367347 | ##### |
| 2 IT | 2020-14 | 1 IT-Northwest | 2 | 3 | 2.855856 | ##### |
| 2 IT | 2020-14 | 1 IT-Northwest | 2 | 4 | 2.134615 | ##### |
| 2 IT | 2020-14 | 1 IT-Northwest | 2 | 5 | 1.421053 | ##### |
| 2 IT | 2020-14 | 1 IT-Northwest | 3 | 1 | 2.660758 | ##### |
| 2 IT | 2020-14 | 1 IT-Northwest | 3 | 2 | 2.4      | ##### |
| 2 IT | 2020-14 | 1 IT-Northwest | 3 | 3 | 3.487805 | ##### |
| 2 IT | 2020-14 | 1 IT-Northwest | 3 | 4 | 2.783784 | ##### |
| 2 IT | 2020-14 | 1 IT-Northwest | 3 | 5 | 1.761905 | ##### |
| 2 IT | 2020-14 | 1 IT-Overall   | 1 | 1 | 2.594612 | ##### |
| 2 IT | 2020-14 | 1 IT-Overall   | 1 | 2 | 2.922067 | ##### |
| 2 IT | 2020-14 | 1 IT-Overall   | 1 | 3 | 3.192824 | ##### |
| 2 IT | 2020-14 | 1 IT-Overall   | 1 | 4 | 2.57384  | ##### |
| 2 IT | 2020-14 | 1 IT-Overall   | 1 | 5 | 1.535904 | ##### |
| 2 IT | 2020-14 | 1 IT-Overall   | 2 | 1 | 2.404532 | ##### |
| 2 IT | 2020-14 | 1 IT-Overall   | 2 | 2 | 2.834876 | ##### |
| 2 IT | 2020-14 | 1 IT-Overall   | 2 | 3 | 3.157202 | ##### |
| 2 IT | 2020-14 | 1 IT-Overall   | 2 | 4 | 2.381619 | ##### |
| 2 IT | 2020-14 | 1 IT-Overall   | 2 | 5 | 1.191088 | ##### |
| 2 IT | 2020-14 | 1 IT-Overall   | 3 | 1 | 2.813899 | ##### |
| 2 IT | 2020-14 | 1 IT-Overall   | 3 | 2 | 3.022318 | ##### |
| 2 IT | 2020-14 | 1 IT-Overall   | 3 | 3 | 3.232628 | ##### |
| 2 IT | 2020-14 | 1 IT-Overall   | 3 | 4 | 2.769101 | ##### |
| 2 IT | 2020-14 | 1 IT-Overall   | 3 | 5 | 2.028102 | ##### |
| 2 IT | 2020-14 | 1 IT-South     | 1 | 1 | 2.172413 | ##### |
| 2 IT | 2020-14 | 1 IT-South     | 1 | 2 | 2.815694 | ##### |
| 2 IT | 2020-14 | 1 IT-South     | 1 | 3 | 2.941599 | ##### |
| 2 IT | 2020-14 | 1 IT-South     | 1 | 4 | 1.831673 | ##### |
| 2 IT | 2020-14 | 1 IT-South     | 1 | 5 | #####    | ##### |
| 2 IT | 2020-14 | 1 IT-South     | 2 | 1 | 1.990124 | ##### |
| 2 IT | 2020-14 | 1 IT-South     | 2 | 2 | 2.954545 | ##### |
| 2 IT | 2020-14 | 1 IT-South     | 2 | 3 | 2.825    | ##### |
| 2 IT | 2020-14 | 1 IT-South     | 2 | 4 | 1.555556 | ##### |
| 2 IT | 2020-14 | 1 IT-South     | 2 | 5 | #####    | ##### |
| 2 IT | 2020-14 | 1 IT-South     | 3 | 1 | 2.411996 | ##### |
| 2 IT | 2020-14 | 1 IT-South     | 3 | 2 | 2.333333 | ##### |
| 2 IT | 2020-14 | 1 IT-South     | 3 | 3 | 3.066667 | ##### |
| 2 IT | 2020-14 | 1 IT-South     | 3 | 4 | 2        | ##### |
| 2 IT | 2020-14 | 1 IT-South     | 3 | 5 | 1.5      | ##### |
| 2 IT | 2020-14 | 2 IT-Central   | 1 | 1 | 1.51578  | ##### |
| 2 IT | 2020-14 | 2 IT-Central   | 1 | 2 | 2.471903 | ##### |
| 2 IT | 2020-14 | 2 IT-Central   | 1 | 3 | 1.661853 | ##### |
| 2 IT | 2020-14 | 2 IT-Central   | 1 | 4 | 1.304633 | ##### |
| 2 IT | 2020-14 | 2 IT-Central   | 1 | 5 | #####    | ##### |
| 2 IT | 2020-14 | 2 IT-Central   | 2 | 1 | 1.465629 | ##### |
| 2 IT | 2020-14 | 2 IT-Central   | 2 | 2 | 2.28     | ##### |



|    |      |         |                |   |   |          |       |  |
|----|------|---------|----------------|---|---|----------|-------|--|
| 1  |      |         |                |   |   |          |       |  |
| 2  |      |         |                |   |   |          |       |  |
| 3  | 2 IT | 2020-14 | 2 IT-Central   | 2 | 3 | 1.797753 | ##### |  |
| 4  | 2 IT | 2020-14 | 2 IT-Central   | 2 | 4 | 1.282609 | ##### |  |
| 5  | 2 IT | 2020-14 | 2 IT-Central   | 2 | 5 | 1        | ##### |  |
| 6  | 2 IT | 2020-14 | 2 IT-Central   | 3 | 1 | 1.58376  | ##### |  |
| 7  | 2 IT | 2020-14 | 2 IT-Central   | 3 | 2 | 2.6      | ##### |  |
| 8  | 2 IT | 2020-14 | 2 IT-Central   | 3 | 3 | 1.514286 | ##### |  |
| 9  | 2 IT | 2020-14 | 2 IT-Central   | 3 | 4 | 1.333333 | ##### |  |
| 10 | 2 IT | 2020-14 | 2 IT-Central   | 3 | 5 | 0.75     | ##### |  |
| 11 | 2 IT | 2020-14 | 2 IT-Insular   | 1 | 1 | 1.785172 | ##### |  |
| 12 | 2 IT | 2020-14 | 2 IT-Insular   | 1 | 2 | 2.248362 | ##### |  |
| 13 | 2 IT | 2020-14 | 2 IT-Insular   | 1 | 3 | 2.049184 | ##### |  |
| 14 | 2 IT | 2020-14 | 2 IT-Insular   | 1 | 4 | 1.495309 | ##### |  |
| 15 | 2 IT | 2020-14 | 2 IT-Insular   | 1 | 5 | 1.333333 | ##### |  |
| 16 | 2 IT | 2020-14 | 2 IT-Insular   | 2 | 1 | 1.823304 | ##### |  |
| 17 | 2 IT | 2020-14 | 2 IT-Insular   | 2 | 2 | 1.923077 | ##### |  |
| 18 | 2 IT | 2020-14 | 2 IT-Insular   | 2 | 3 | 2.466667 | ##### |  |
| 19 | 2 IT | 2020-14 | 2 IT-Insular   | 2 | 4 | 1.2      | ##### |  |
| 20 | 2 IT | 2020-14 | 2 IT-Insular   | 2 | 5 | 1.333333 | ##### |  |
| 21 | 2 IT | 2020-14 | 2 IT-Insular   | 3 | 1 | 1.710295 | ##### |  |
| 22 | 2 IT | 2020-14 | 2 IT-Insular   | 3 | 2 | 3        | ##### |  |
| 23 | 2 IT | 2020-14 | 2 IT-Insular   | 3 | 3 | 1        | ##### |  |
| 24 | 2 IT | 2020-14 | 2 IT-Insular   | 3 | 4 | 1.833333 | ##### |  |
| 25 | 2 IT | 2020-14 | 2 IT-Northeast | 1 | 1 | 1.449345 | ##### |  |
| 26 | 2 IT | 2020-14 | 2 IT-Northeast | 1 | 2 | 2.489117 | ##### |  |
| 27 | 2 IT | 2020-14 | 2 IT-Northeast | 1 | 3 | 1.435784 | ##### |  |
| 28 | 2 IT | 2020-14 | 2 IT-Northeast | 1 | 4 | 1.270229 | ##### |  |
| 29 | 2 IT | 2020-14 | 2 IT-Northeast | 1 | 5 | 1.176376 | ##### |  |
| 30 | 2 IT | 2020-14 | 2 IT-Northeast | 2 | 1 | 1.324721 | ##### |  |
| 31 | 2 IT | 2020-14 | 2 IT-Northeast | 2 | 2 | 2.102564 | ##### |  |
| 32 | 2 IT | 2020-14 | 2 IT-Northeast | 2 | 3 | 1.422535 | ##### |  |
| 33 | 2 IT | 2020-14 | 2 IT-Northeast | 2 | 4 | 1.36     | ##### |  |
| 34 | 2 IT | 2020-14 | 2 IT-Northeast | 2 | 5 | #####    | ##### |  |
| 35 | 2 IT | 2020-14 | 2 IT-Northeast | 3 | 1 | 1.570764 | ##### |  |
| 36 | 2 IT | 2020-14 | 2 IT-Northeast | 3 | 2 | 2.8125   | ##### |  |
| 37 | 2 IT | 2020-14 | 2 IT-Northeast | 3 | 3 | 1.446809 | ##### |  |
| 38 | 2 IT | 2020-14 | 2 IT-Northeast | 3 | 4 | 1.16     | ##### |  |
| 39 | 2 IT | 2020-14 | 2 IT-Northeast | 3 | 5 | 1.5      | ##### |  |
| 40 | 2 IT | 2020-14 | 2 IT-Northwest | 1 | 1 | 1.568335 | ##### |  |
| 41 | 2 IT | 2020-14 | 2 IT-Northwest | 1 | 2 | 2.370442 | ##### |  |
| 42 | 2 IT | 2020-14 | 2 IT-Northwest | 1 | 3 | 1.730722 | ##### |  |
| 43 | 2 IT | 2020-14 | 2 IT-Northwest | 1 | 4 | 1.460412 | ##### |  |
| 44 | 2 IT | 2020-14 | 2 IT-Northwest | 1 | 5 | #####    | ##### |  |
| 45 | 2 IT | 2020-14 | 2 IT-Northwest | 2 | 1 | 1.489007 | ##### |  |
| 46 | 2 IT | 2020-14 | 2 IT-Northwest | 2 | 2 | 2.45098  | ##### |  |
| 47 | 2 IT | 2020-14 | 2 IT-Northwest | 2 | 3 | 1.62931  | ##### |  |
| 48 | 2 IT | 2020-14 | 2 IT-Northwest | 2 | 4 | 1.320755 | ##### |  |
| 49 | 2 IT | 2020-14 | 2 IT-Northwest | 2 | 5 | #####    | ##### |  |
| 50 | 2 IT | 2020-14 | 2 IT-Northwest | 3 | 1 | 1.637655 | ##### |  |
| 51 | 2 IT | 2020-14 | 2 IT-Northwest | 3 | 2 | 2.307692 | ##### |  |
| 52 | 2 IT | 2020-14 | 2 IT-Northwest | 3 | 3 | 1.833333 | ##### |  |
| 53 | 2 IT | 2020-14 | 2 IT-Northwest | 3 | 4 | 1.578947 | ##### |  |
| 54 | 2 IT | 2020-14 | 2 IT-Northwest | 3 | 5 | 1        | ##### |  |
| 55 | 2 IT | 2020-14 | 2 IT-Overall   | 1 | 1 | 1.551048 | ##### |  |
| 56 | 2 IT | 2020-14 | 2 IT-Overall   | 1 | 2 | 2.461128 | ##### |  |
| 57 | 2 IT | 2020-14 | 2 IT-Overall   | 1 | 3 | 1.742564 | ##### |  |
| 58 | 2 IT | 2020-14 | 2 IT-Overall   | 1 | 4 | 1.368089 | ##### |  |
| 59 | 2 IT | 2020-14 | 2 IT-Overall   | 1 |   |          |       |  |
| 60 | 2 IT | 2020-14 | 2 IT-Overall   | 1 |   |          |       |  |

1  
2  
3  
4  
5  
6  
7  
8  
9  
10  
11  
12  
13  
14  
15  
16  
17  
18  
19  
20  
21  
22  
23  
24  
25  
26  
27  
28  
29  
30  
31  
32  
33  
34  
35  
36  
37  
38  
39  
40  
41  
42  
43  
44  
45  
46  
47  
48  
49  
50  
51  
52  
53  
54  
55  
56  
57  
58  
59  
60

|      |         |                |   |   |          |       |   |  |
|------|---------|----------------|---|---|----------|-------|---|--|
| 2 IT | 2020-14 | 2 IT-Overall   | 1 | 5 | #####    | ##### |   |  |
| 2 IT | 2020-14 | 2 IT-Overall   | 2 | 1 | 1.504    | ##### |   |  |
| 2 IT | 2020-14 | 2 IT-Overall   | 2 | 2 | 2.401374 | ##### |   |  |
| 2 IT | 2020-14 | 2 IT-Overall   | 2 | 3 | 1.832575 | ##### |   |  |
| 2 IT | 2020-14 | 2 IT-Overall   | 2 | 4 | 1.282669 | ##### |   |  |
| 2 IT | 2020-14 | 2 IT-Overall   | 2 | 5 | #####    | ##### |   |  |
| 2 IT | 2020-14 | 2 IT-Overall   | 3 | 1 | 1.604863 | ##### |   |  |
| 2 IT | 2020-14 | 2 IT-Overall   | 3 | 2 | 2.52566  | ##### |   |  |
| 2 IT | 2020-14 | 2 IT-Overall   | 3 | 3 | 1.645549 | ##### |   |  |
| 2 IT | 2020-14 | 2 IT-Overall   | 3 | 4 | 1.455025 | ##### |   |  |
| 2 IT | 2020-14 | 2 IT-Overall   | 3 | 5 | 1.089942 | ##### |   |  |
| 2 IT | 2020-14 | 2 IT-South     | 1 | 1 | 1.591934 | ##### |   |  |
| 2 IT | 2020-14 | 2 IT-South     | 1 | 2 | 2.639221 | ##### |   |  |
| 2 IT | 2020-14 | 2 IT-South     | 1 | 3 | 1.987582 | ##### |   |  |
| 2 IT | 2020-14 | 2 IT-South     | 1 | 4 | 1.33847  | ##### |   |  |
| 2 IT | 2020-14 | 2 IT-South     | 1 | 5 | #####    | ##### |   |  |
| 2 IT | 2020-14 | 2 IT-South     | 2 | 1 | 1.59824  | ##### |   |  |
| 2 IT | 2020-14 | 2 IT-South     | 2 | 2 | 2.727273 | ##### |   |  |
| 2 IT | 2020-14 | 2 IT-South     | 2 | 3 | 2.097561 | ##### |   |  |
| 2 IT | 2020-14 | 2 IT-South     | 2 | 4 | 1.1      | ##### |   |  |
| 2 IT | 2020-14 | 2 IT-South     | 2 | 5 | #####    | ##### |   |  |
| 2 IT | 2020-14 | 2 IT-South     | 3 | 1 | 1.583219 | ##### |   |  |
| 2 IT | 2020-14 | 2 IT-South     | 3 | 2 | 2.333333 | ##### |   |  |
| 2 IT | 2020-14 | 2 IT-South     | 3 | 3 | 1.866667 | ##### |   |  |
| 2 IT | 2020-14 | 2 IT-South     | 3 | 4 | 1.5      | ##### |   |  |
| 2 IT | 2020-14 | 2 IT-South     | 3 | 5 | 0.75     | ##### |   |  |
| 2 IT | 2020-14 | 3 IT-Central   | 1 | 1 | 0        |       | 0 |  |
| 2 IT | 2020-14 | 3 IT-Central   | 1 | 2 | 0        |       | 0 |  |
| 2 IT | 2020-14 | 3 IT-Central   | 1 | 3 | 0        |       | 0 |  |
| 2 IT | 2020-14 | 3 IT-Central   | 1 | 4 | 0        |       | 0 |  |
| 2 IT | 2020-14 | 3 IT-Central   | 1 | 5 | 0        |       | 0 |  |
| 2 IT | 2020-14 | 3 IT-Central   | 2 | 1 | 0        |       | 0 |  |
| 2 IT | 2020-14 | 3 IT-Central   | 2 | 2 | 0        |       | 0 |  |
| 2 IT | 2020-14 | 3 IT-Central   | 2 | 3 | 0        |       | 0 |  |
| 2 IT | 2020-14 | 3 IT-Central   | 2 | 4 | 0        |       | 0 |  |
| 2 IT | 2020-14 | 3 IT-Central   | 2 | 5 | 0        |       | 0 |  |
| 2 IT | 2020-14 | 3 IT-Central   | 3 | 1 | 0        |       | 0 |  |
| 2 IT | 2020-14 | 3 IT-Central   | 3 | 2 | 0        |       | 0 |  |
| 2 IT | 2020-14 | 3 IT-Central   | 3 | 3 | 0        |       | 0 |  |
| 2 IT | 2020-14 | 3 IT-Central   | 3 | 4 | 0        |       | 0 |  |
| 2 IT | 2020-14 | 3 IT-Central   | 3 | 5 | 0        |       | 0 |  |
| 2 IT | 2020-14 | 3 IT-Insular   | 1 | 1 | 0        |       | 0 |  |
| 2 IT | 2020-14 | 3 IT-Insular   | 1 | 2 | 0        |       | 0 |  |
| 2 IT | 2020-14 | 3 IT-Insular   | 1 | 3 | 0        |       | 0 |  |
| 2 IT | 2020-14 | 3 IT-Insular   | 1 | 4 | 0        |       | 0 |  |
| 2 IT | 2020-14 | 3 IT-Insular   | 1 | 5 | 0        |       | 0 |  |
| 2 IT | 2020-14 | 3 IT-Insular   | 2 | 1 | 0        |       | 0 |  |
| 2 IT | 2020-14 | 3 IT-Insular   | 2 | 2 | 0        |       | 0 |  |
| 2 IT | 2020-14 | 3 IT-Insular   | 2 | 3 | 0        |       | 0 |  |
| 2 IT | 2020-14 | 3 IT-Insular   | 2 | 4 | 0        |       | 0 |  |
| 2 IT | 2020-14 | 3 IT-Insular   | 2 | 5 | 0        |       | 0 |  |
| 2 IT | 2020-14 | 3 IT-Insular   | 3 | 1 | 0        |       | 0 |  |
| 2 IT | 2020-14 | 3 IT-Insular   | 3 | 2 | 0        |       | 0 |  |
| 2 IT | 2020-14 | 3 IT-Insular   | 3 | 3 | 0        |       | 0 |  |
| 2 IT | 2020-14 | 3 IT-Insular   | 3 | 4 | 0        |       | 0 |  |
| 2 IT | 2020-14 | 3 IT-Northeast | 1 | 1 | 0        |       | 0 |  |

|    |      |         |                |   |   |   |   |
|----|------|---------|----------------|---|---|---|---|
| 1  |      |         |                |   |   |   |   |
| 2  |      |         |                |   |   |   |   |
| 3  | 2 IT | 2020-14 | 3 IT-Northeast | 1 | 2 | 0 | 0 |
| 4  | 2 IT | 2020-14 | 3 IT-Northeast | 1 | 3 | 0 | 0 |
| 5  | 2 IT | 2020-14 | 3 IT-Northeast | 1 | 4 | 0 | 0 |
| 6  | 2 IT | 2020-14 | 3 IT-Northeast | 1 | 5 | 0 | 0 |
| 7  | 2 IT | 2020-14 | 3 IT-Northeast | 2 | 1 | 0 | 0 |
| 8  | 2 IT | 2020-14 | 3 IT-Northeast | 2 | 2 | 0 | 0 |
| 9  | 2 IT | 2020-14 | 3 IT-Northeast | 2 | 3 | 0 | 0 |
| 10 | 2 IT | 2020-14 | 3 IT-Northeast | 2 | 4 | 0 | 0 |
| 11 | 2 IT | 2020-14 | 3 IT-Northeast | 2 | 5 | 0 | 0 |
| 12 | 2 IT | 2020-14 | 3 IT-Northeast | 3 | 1 | 0 | 0 |
| 13 | 2 IT | 2020-14 | 3 IT-Northeast | 3 | 2 | 0 | 0 |
| 14 | 2 IT | 2020-14 | 3 IT-Northeast | 3 | 3 | 0 | 0 |
| 15 | 2 IT | 2020-14 | 3 IT-Northeast | 3 | 4 | 0 | 0 |
| 16 | 2 IT | 2020-14 | 3 IT-Northeast | 3 | 5 | 0 | 0 |
| 17 | 2 IT | 2020-14 | 3 IT-Northeast | 3 | 5 | 0 | 0 |
| 18 | 2 IT | 2020-14 | 3 IT-Northeast | 3 | 5 | 0 | 0 |
| 19 | 2 IT | 2020-14 | 3 IT-Northeast | 3 | 5 | 0 | 0 |
| 20 | 2 IT | 2020-14 | 3 IT-Northeast | 3 | 5 | 0 | 0 |
| 21 | 2 IT | 2020-14 | 3 IT-Northeast | 3 | 5 | 0 | 0 |
| 22 | 2 IT | 2020-14 | 3 IT-Northeast | 3 | 5 | 0 | 0 |
| 23 | 2 IT | 2020-14 | 3 IT-Northeast | 3 | 5 | 0 | 0 |
| 24 | 2 IT | 2020-14 | 3 IT-Northeast | 3 | 5 | 0 | 0 |
| 25 | 2 IT | 2020-14 | 3 IT-Northeast | 3 | 5 | 0 | 0 |
| 26 | 2 IT | 2020-14 | 3 IT-Northeast | 3 | 5 | 0 | 0 |
| 27 | 2 IT | 2020-14 | 3 IT-Northeast | 3 | 5 | 0 | 0 |
| 28 | 2 IT | 2020-14 | 3 IT-Northeast | 3 | 5 | 0 | 0 |
| 29 | 2 IT | 2020-14 | 3 IT-Northeast | 3 | 5 | 0 | 0 |
| 30 | 2 IT | 2020-14 | 3 IT-Northeast | 3 | 5 | 0 | 0 |
| 31 | 2 IT | 2020-14 | 3 IT-Northeast | 3 | 5 | 0 | 0 |
| 32 | 2 IT | 2020-14 | 3 IT-Northeast | 3 | 5 | 0 | 0 |
| 33 | 2 IT | 2020-14 | 3 IT-Overall   | 1 | 1 | 0 | 0 |
| 34 | 2 IT | 2020-14 | 3 IT-Overall   | 1 | 2 | 0 | 0 |
| 35 | 2 IT | 2020-14 | 3 IT-Overall   | 1 | 3 | 0 | 0 |
| 36 | 2 IT | 2020-14 | 3 IT-Overall   | 1 | 4 | 0 | 0 |
| 37 | 2 IT | 2020-14 | 3 IT-Overall   | 1 | 5 | 0 | 0 |
| 38 | 2 IT | 2020-14 | 3 IT-Overall   | 2 | 1 | 0 | 0 |
| 39 | 2 IT | 2020-14 | 3 IT-Overall   | 2 | 2 | 0 | 0 |
| 40 | 2 IT | 2020-14 | 3 IT-Overall   | 2 | 3 | 0 | 0 |
| 41 | 2 IT | 2020-14 | 3 IT-Overall   | 2 | 4 | 0 | 0 |
| 42 | 2 IT | 2020-14 | 3 IT-Overall   | 2 | 5 | 0 | 0 |
| 43 | 2 IT | 2020-14 | 3 IT-Overall   | 3 | 1 | 0 | 0 |
| 44 | 2 IT | 2020-14 | 3 IT-Overall   | 3 | 2 | 0 | 0 |
| 45 | 2 IT | 2020-14 | 3 IT-Overall   | 3 | 3 | 0 | 0 |
| 46 | 2 IT | 2020-14 | 3 IT-Overall   | 3 | 4 | 0 | 0 |
| 47 | 2 IT | 2020-14 | 3 IT-Overall   | 3 | 5 | 0 | 0 |
| 48 | 2 IT | 2020-14 | 3 IT-South     | 1 | 1 | 0 | 0 |
| 49 | 2 IT | 2020-14 | 3 IT-South     | 1 | 2 | 0 | 0 |
| 50 | 2 IT | 2020-14 | 3 IT-South     | 1 | 3 | 0 | 0 |
| 51 | 2 IT | 2020-14 | 3 IT-South     | 1 | 4 | 0 | 0 |
| 52 | 2 IT | 2020-14 | 3 IT-South     | 1 | 5 | 0 | 0 |
| 53 | 2 IT | 2020-14 | 3 IT-South     | 2 | 1 | 0 | 0 |
| 54 | 2 IT | 2020-14 | 3 IT-South     | 2 | 2 | 0 | 0 |
| 55 | 2 IT | 2020-14 | 3 IT-South     | 2 | 3 | 0 | 0 |
| 56 | 2 IT | 2020-14 | 3 IT-South     | 2 | 4 | 0 | 0 |
| 57 | 2 IT | 2020-14 | 3 IT-South     | 2 | 5 | 0 | 0 |
| 58 | 2 IT | 2020-14 | 3 IT-South     | 3 | 1 | 0 | 0 |
| 59 | 2 IT | 2020-14 | 3 IT-South     | 3 | 2 | 0 | 0 |
| 60 | 2 IT | 2020-14 | 3 IT-South     | 3 | 2 | 0 | 0 |

|    |      |         |                |   |   |          |          |  |
|----|------|---------|----------------|---|---|----------|----------|--|
| 1  |      |         |                |   |   |          |          |  |
| 2  |      |         |                |   |   |          |          |  |
| 3  | 2 IT | 2020-14 | 3 IT-South     | 3 | 3 | 0        | 0        |  |
| 4  | 2 IT | 2020-14 | 3 IT-South     | 3 | 4 | 0        | 0        |  |
| 5  | 2 IT | 2020-14 | 3 IT-South     | 3 | 5 | 0        | 0        |  |
| 6  | 2 IT | 2020-14 | 4 IT-Central   | 1 | 1 | #####    | #####    |  |
| 7  | 2 IT | 2020-14 | 4 IT-Central   | 1 | 2 | #####    | #####    |  |
| 8  | 2 IT | 2020-14 | 4 IT-Central   | 1 | 3 | #####    | #####    |  |
| 9  | 2 IT | 2020-14 | 4 IT-Central   | 1 | 4 | 1.251589 | #####    |  |
| 10 | 2 IT | 2020-14 | 4 IT-Central   | 1 | 5 | #####    | #####    |  |
| 11 | 2 IT | 2020-14 | 4 IT-Central   | 2 | 1 | #####    | #####    |  |
| 12 | 2 IT | 2020-14 | 4 IT-Central   | 2 | 2 | 0        | 0        |  |
| 13 | 2 IT | 2020-14 | 4 IT-Central   | 2 | 3 | #####    | #####    |  |
| 14 | 2 IT | 2020-14 | 4 IT-Central   | 2 | 4 | 1.12766  | #####    |  |
| 15 | 2 IT | 2020-14 | 4 IT-Central   | 2 | 5 | 0        | 0        |  |
| 16 | 2 IT | 2020-14 | 4 IT-Central   | 3 | 1 | 1.245374 | #####    |  |
| 17 | 2 IT | 2020-14 | 4 IT-Central   | 3 | 2 | 0.9375   | #####    |  |
| 18 | 2 IT | 2020-14 | 4 IT-Central   | 3 | 3 | 1.147059 | #####    |  |
| 19 | 2 IT | 2020-14 | 4 IT-Central   | 3 | 4 | 1.409091 | #####    |  |
| 20 | 2 IT | 2020-14 | 4 IT-Central   | 3 | 5 | 1.75     | 1.515643 |  |
| 21 | 2 IT | 2020-14 | 4 IT-Insular   | 1 | 1 | 1.10487  | #####    |  |
| 22 | 2 IT | 2020-14 | 4 IT-Insular   | 1 | 2 | #####    | #####    |  |
| 23 | 2 IT | 2020-14 | 4 IT-Insular   | 1 | 3 | 2.327746 | 1.112049 |  |
| 24 | 2 IT | 2020-14 | 4 IT-Insular   | 1 | 4 | #####    | #####    |  |
| 25 | 2 IT | 2020-14 | 4 IT-Insular   | 1 | 5 | 0        | 0        |  |
| 26 | 2 IT | 2020-14 | 4 IT-Insular   | 2 | 1 | #####    | #####    |  |
| 27 | 2 IT | 2020-14 | 4 IT-Insular   | 2 | 2 | 0.5      | #####    |  |
| 28 | 2 IT | 2020-14 | 4 IT-Insular   | 2 | 3 | 1.172414 | #####    |  |
| 29 | 2 IT | 2020-14 | 4 IT-Insular   | 2 | 4 | #####    | #####    |  |
| 30 | 2 IT | 2020-14 | 4 IT-Insular   | 2 | 5 | 0        | 0        |  |
| 31 | 2 IT | 2020-14 | 4 IT-Insular   | 3 | 1 | 2.003195 | 1.128477 |  |
| 32 | 2 IT | 2020-14 | 4 IT-Insular   | 3 | 2 | 0        | 0        |  |
| 33 | 2 IT | 2020-14 | 4 IT-Insular   | 3 | 3 | 4.666667 | 2.704767 |  |
| 34 | 2 IT | 2020-14 | 4 IT-Insular   | 3 | 4 | #####    | #####    |  |
| 35 | 2 IT | 2020-14 | 4 IT-Northeast | 1 | 1 | #####    | #####    |  |
| 36 | 2 IT | 2020-14 | 4 IT-Northeast | 1 | 2 | #####    | #####    |  |
| 37 | 2 IT | 2020-14 | 4 IT-Northeast | 1 | 3 | 1.281844 | #####    |  |
| 38 | 2 IT | 2020-14 | 4 IT-Northeast | 1 | 4 | #####    | #####    |  |
| 39 | 2 IT | 2020-14 | 4 IT-Northeast | 1 | 5 | 0        | 0        |  |
| 40 | 2 IT | 2020-14 | 4 IT-Northeast | 2 | 1 | #####    | #####    |  |
| 41 | 2 IT | 2020-14 | 4 IT-Northeast | 2 | 2 | #####    | #####    |  |
| 42 | 2 IT | 2020-14 | 4 IT-Northeast | 2 | 3 | 1.635135 | #####    |  |
| 43 | 2 IT | 2020-14 | 4 IT-Northeast | 2 | 4 | 1.081633 | #####    |  |
| 44 | 2 IT | 2020-14 | 4 IT-Northeast | 2 | 5 | 0        | 0        |  |
| 45 | 2 IT | 2020-14 | 4 IT-Northeast | 3 | 1 | #####    | #####    |  |
| 46 | 2 IT | 2020-14 | 4 IT-Northeast | 3 | 2 | 0.4      | #####    |  |
| 47 | 2 IT | 2020-14 | 4 IT-Northeast | 3 | 3 | #####    | #####    |  |
| 48 | 2 IT | 2020-14 | 4 IT-Northeast | 3 | 4 | #####    | #####    |  |
| 49 | 2 IT | 2020-14 | 4 IT-Northeast | 3 | 5 | 0        | 0        |  |
| 50 | 2 IT | 2020-14 | 4 IT-Northwest | 1 | 1 | #####    | #####    |  |
| 51 | 2 IT | 2020-14 | 4 IT-Northwest | 1 | 2 | #####    | #####    |  |
| 52 | 2 IT | 2020-14 | 4 IT-Northwest | 1 | 3 | #####    | #####    |  |
| 53 | 2 IT | 2020-14 | 4 IT-Northwest | 1 | 4 | #####    | #####    |  |
| 54 | 2 IT | 2020-14 | 4 IT-Northwest | 1 | 5 | #####    | #####    |  |
| 55 | 2 IT | 2020-14 | 4 IT-Northwest | 2 | 1 | #####    | #####    |  |
| 56 | 2 IT | 2020-14 | 4 IT-Northwest | 2 | 2 | #####    | #####    |  |
| 57 | 2 IT | 2020-14 | 4 IT-Northwest | 2 | 3 | #####    | #####    |  |
| 58 | 2 IT | 2020-14 | 4 IT-Northwest | 2 | 4 | 0.5      | #####    |  |
| 59 | 2 IT | 2020-14 | 4 IT-Northwest | 2 | 5 | #####    | #####    |  |
| 60 | 2 IT | 2020-14 | 4 IT-Northwest | 2 | 4 | 0.5      | #####    |  |

|    |      |         |              |   |   |          |       |  |
|----|------|---------|--------------|---|---|----------|-------|--|
| 1  |      |         |              |   |   |          |       |  |
| 2  |      |         |              |   |   |          |       |  |
| 3  | 2 IT | 2020-14 | 4 IT-Northwe | 2 | 5 | 0        | 0     |  |
| 4  | 2 IT | 2020-14 | 4 IT-Northwe | 3 | 1 | #####    | ##### |  |
| 5  | 2 IT | 2020-14 | 4 IT-Northwe | 3 | 2 | 0.04     | ##### |  |
| 6  | 2 IT | 2020-14 | 4 IT-Northwe | 3 | 3 | #####    | ##### |  |
| 7  | 2 IT | 2020-14 | 4 IT-Northwe | 3 | 4 | #####    | ##### |  |
| 8  | 2 IT | 2020-14 | 4 IT-Northwe | 3 | 5 | #####    | ##### |  |
| 9  | 2 IT | 2020-14 | 4 IT-Overall | 1 | 1 | #####    | ##### |  |
| 10 | 2 IT | 2020-14 | 4 IT-Overall | 1 | 2 | #####    | ##### |  |
| 11 | 2 IT | 2020-14 | 4 IT-Overall | 1 | 3 | #####    | ##### |  |
| 12 | 2 IT | 2020-14 | 4 IT-Overall | 1 | 4 | #####    | ##### |  |
| 13 | 2 IT | 2020-14 | 4 IT-Overall | 1 | 5 | #####    | ##### |  |
| 14 | 2 IT | 2020-14 | 4 IT-Overall | 2 | 1 | #####    | ##### |  |
| 15 | 2 IT | 2020-14 | 4 IT-Overall | 2 | 2 | #####    | ##### |  |
| 16 | 2 IT | 2020-14 | 4 IT-Overall | 2 | 3 | #####    | ##### |  |
| 17 | 2 IT | 2020-14 | 4 IT-Overall | 2 | 4 | #####    | ##### |  |
| 18 | 2 IT | 2020-14 | 4 IT-Overall | 2 | 5 | 0        | 0     |  |
| 19 | 2 IT | 2020-14 | 4 IT-Overall | 3 | 1 | #####    | ##### |  |
| 20 | 2 IT | 2020-14 | 4 IT-Overall | 3 | 2 | #####    | ##### |  |
| 21 | 2 IT | 2020-14 | 4 IT-Overall | 3 | 3 | #####    | ##### |  |
| 22 | 2 IT | 2020-14 | 4 IT-Overall | 3 | 4 | #####    | ##### |  |
| 23 | 2 IT | 2020-14 | 4 IT-Overall | 3 | 5 | #####    | ##### |  |
| 24 | 2 IT | 2020-14 | 4 IT-Overall | 3 | 5 | #####    | ##### |  |
| 25 | 2 IT | 2020-14 | 4 IT-South   | 1 | 1 | #####    | ##### |  |
| 26 | 2 IT | 2020-14 | 4 IT-South   | 1 | 2 | 0        | 0     |  |
| 27 | 2 IT | 2020-14 | 4 IT-South   | 1 | 3 | #####    | ##### |  |
| 28 | 2 IT | 2020-14 | 4 IT-South   | 1 | 4 | #####    | ##### |  |
| 29 | 2 IT | 2020-14 | 4 IT-South   | 1 | 5 | 0        | 0     |  |
| 30 | 2 IT | 2020-14 | 4 IT-South   | 2 | 1 | #####    | ##### |  |
| 31 | 2 IT | 2020-14 | 4 IT-South   | 2 | 2 | 0        | 0     |  |
| 32 | 2 IT | 2020-14 | 4 IT-South   | 2 | 3 | #####    | ##### |  |
| 33 | 2 IT | 2020-14 | 4 IT-South   | 2 | 4 | #####    | ##### |  |
| 34 | 2 IT | 2020-14 | 4 IT-South   | 2 | 5 | 0        | 0     |  |
| 35 | 2 IT | 2020-14 | 4 IT-South   | 3 | 1 | #####    | ##### |  |
| 36 | 2 IT | 2020-14 | 4 IT-South   | 3 | 2 | 0        | 0     |  |
| 37 | 2 IT | 2020-14 | 4 IT-South   | 3 | 3 | #####    | ##### |  |
| 38 | 2 IT | 2020-14 | 4 IT-South   | 3 | 4 | 0        | 0     |  |
| 39 | 2 IT | 2020-14 | 4 IT-South   | 3 | 5 | 0        | 0     |  |
| 40 | 2 IT | 2020-14 | 5 IT-Central | 1 | 1 | #####    | ##### |  |
| 41 | 2 IT | 2020-14 | 5 IT-Central | 1 | 2 | #####    | ##### |  |
| 42 | 2 IT | 2020-14 | 5 IT-Central | 1 | 3 | #####    | ##### |  |
| 43 | 2 IT | 2020-14 | 5 IT-Central | 1 | 4 | #####    | ##### |  |
| 44 | 2 IT | 2020-14 | 5 IT-Central | 1 | 5 | #####    | ##### |  |
| 45 | 2 IT | 2020-14 | 5 IT-Central | 2 | 1 | #####    | ##### |  |
| 46 | 2 IT | 2020-14 | 5 IT-Central | 2 | 2 | #####    | ##### |  |
| 47 | 2 IT | 2020-14 | 5 IT-Central | 2 | 3 | #####    | ##### |  |
| 48 | 2 IT | 2020-14 | 5 IT-Central | 2 | 4 | 0.5625   | ##### |  |
| 49 | 2 IT | 2020-14 | 5 IT-Central | 2 | 5 | #####    | ##### |  |
| 50 | 2 IT | 2020-14 | 5 IT-Central | 3 | 1 | #####    | ##### |  |
| 51 | 2 IT | 2020-14 | 5 IT-Central | 3 | 2 | #####    | ##### |  |
| 52 | 2 IT | 2020-14 | 5 IT-Central | 3 | 3 | #####    | ##### |  |
| 53 | 2 IT | 2020-14 | 5 IT-Central | 3 | 4 | #####    | ##### |  |
| 54 | 2 IT | 2020-14 | 5 IT-Central | 3 | 5 | 1.25     | ##### |  |
| 55 | 2 IT | 2020-14 | 5 IT-Insular | 1 | 1 | #####    | ##### |  |
| 56 | 2 IT | 2020-14 | 5 IT-Insular | 1 | 2 | #####    | ##### |  |
| 57 | 2 IT | 2020-14 | 5 IT-Insular | 1 | 3 | 1.031591 | ##### |  |
| 58 | 2 IT | 2020-14 | 5 IT-Insular | 1 | 4 | #####    | ##### |  |
| 59 | 2 IT | 2020-14 | 5 IT-Insular | 1 | 5 | 0        | 0     |  |
| 60 | 2 IT | 2020-14 | 5 IT-Insular | 1 | 5 | 0        | 0     |  |

1  
2  
3  
4  
5  
6  
7  
8  
9  
10  
11  
12  
13  
14  
15  
16  
17  
18  
19  
20  
21  
22  
23  
24  
25  
26  
27  
28  
29  
30  
31  
32  
33  
34  
35  
36  
37  
38  
39  
40  
41  
42  
43  
44  
45  
46  
47  
48  
49  
50  
51  
52  
53  
54  
55  
56  
57  
58  
59  
60

|      |         |                |   |   |       |       |
|------|---------|----------------|---|---|-------|-------|
| 2 IT | 2020-14 | 5 IT-Insular   | 2 | 1 | ##### | ##### |
| 2 IT | 2020-14 | 5 IT-Insular   | 2 | 2 | ##### | ##### |
| 2 IT | 2020-14 | 5 IT-Insular   | 2 | 3 | ##### | ##### |
| 2 IT | 2020-14 | 5 IT-Insular   | 2 | 4 | ##### | ##### |
| 2 IT | 2020-14 | 5 IT-Insular   | 2 | 5 | 0     | 0     |
| 2 IT | 2020-14 | 5 IT-Insular   | 3 | 1 | ##### | ##### |
| 2 IT | 2020-14 | 5 IT-Insular   | 3 | 2 | 0     | 0     |
| 2 IT | 2020-14 | 5 IT-Insular   | 3 | 3 | 2.2   | ##### |
| 2 IT | 2020-14 | 5 IT-Insular   | 3 | 4 | 0.5   | ##### |
| 2 IT | 2020-14 | 5 IT-Northeast | 1 | 1 | ##### | ##### |
| 2 IT | 2020-14 | 5 IT-Northeast | 1 | 2 | ##### | ##### |
| 2 IT | 2020-14 | 5 IT-Northeast | 1 | 3 | ##### | ##### |
| 2 IT | 2020-14 | 5 IT-Northeast | 1 | 4 | ##### | ##### |
| 2 IT | 2020-14 | 5 IT-Northeast | 1 | 5 | ##### | ##### |
| 2 IT | 2020-14 | 5 IT-Northeast | 2 | 1 | ##### | ##### |
| 2 IT | 2020-14 | 5 IT-Northeast | 2 | 2 | ##### | ##### |
| 2 IT | 2020-14 | 5 IT-Northeast | 2 | 3 | ##### | ##### |
| 2 IT | 2020-14 | 5 IT-Northeast | 2 | 4 | 0.46  | ##### |
| 2 IT | 2020-14 | 5 IT-Northeast | 2 | 5 | ##### | ##### |
| 2 IT | 2020-14 | 5 IT-Northeast | 3 | 1 | ##### | ##### |
| 2 IT | 2020-14 | 5 IT-Northeast | 3 | 2 | ##### | ##### |
| 2 IT | 2020-14 | 5 IT-Northeast | 3 | 3 | 0.5   | ##### |
| 2 IT | 2020-14 | 5 IT-Northeast | 3 | 4 | 0.76  | ##### |
| 2 IT | 2020-14 | 5 IT-Northeast | 3 | 5 | ##### | ##### |
| 2 IT | 2020-14 | 5 IT-Northwest | 1 | 1 | ##### | ##### |
| 2 IT | 2020-14 | 5 IT-Northwest | 1 | 2 | ##### | ##### |
| 2 IT | 2020-14 | 5 IT-Northwest | 1 | 3 | ##### | ##### |
| 2 IT | 2020-14 | 5 IT-Northwest | 1 | 4 | ##### | ##### |
| 2 IT | 2020-14 | 5 IT-Northwest | 1 | 5 | ##### | ##### |
| 2 IT | 2020-14 | 5 IT-Northwest | 2 | 1 | ##### | ##### |
| 2 IT | 2020-14 | 5 IT-Northwest | 2 | 2 | ##### | ##### |
| 2 IT | 2020-14 | 5 IT-Northwest | 2 | 3 | ##### | ##### |
| 2 IT | 2020-14 | 5 IT-Northwest | 2 | 4 | ##### | ##### |
| 2 IT | 2020-14 | 5 IT-Northwest | 2 | 5 | 0.55  | ##### |
| 2 IT | 2020-14 | 5 IT-Northwest | 3 | 1 | ##### | ##### |
| 2 IT | 2020-14 | 5 IT-Northwest | 3 | 2 | ##### | ##### |
| 2 IT | 2020-14 | 5 IT-Northwest | 3 | 3 | ##### | ##### |
| 2 IT | 2020-14 | 5 IT-Northwest | 3 | 4 | ##### | ##### |
| 2 IT | 2020-14 | 5 IT-Northwest | 3 | 5 | ##### | ##### |
| 2 IT | 2020-14 | 5 IT-Overall   | 1 | 1 | ##### | ##### |
| 2 IT | 2020-14 | 5 IT-Overall   | 1 | 2 | ##### | ##### |
| 2 IT | 2020-14 | 5 IT-Overall   | 1 | 3 | ##### | ##### |
| 2 IT | 2020-14 | 5 IT-Overall   | 1 | 4 | ##### | ##### |
| 2 IT | 2020-14 | 5 IT-Overall   | 1 | 5 | ##### | ##### |
| 2 IT | 2020-14 | 5 IT-Overall   | 2 | 1 | ##### | ##### |
| 2 IT | 2020-14 | 5 IT-Overall   | 2 | 2 | ##### | ##### |
| 2 IT | 2020-14 | 5 IT-Overall   | 2 | 3 | ##### | ##### |
| 2 IT | 2020-14 | 5 IT-Overall   | 2 | 4 | ##### | ##### |
| 2 IT | 2020-14 | 5 IT-Overall   | 2 | 5 | ##### | ##### |
| 2 IT | 2020-14 | 5 IT-Overall   | 3 | 1 | ##### | ##### |
| 2 IT | 2020-14 | 5 IT-Overall   | 3 | 2 | ##### | ##### |
| 2 IT | 2020-14 | 5 IT-Overall   | 3 | 3 | ##### | ##### |
| 2 IT | 2020-14 | 5 IT-Overall   | 3 | 4 | ##### | ##### |
| 2 IT | 2020-14 | 5 IT-Overall   | 3 | 5 | ##### | ##### |
| 2 IT | 2020-14 | 5 IT-South     | 1 | 1 | ##### | ##### |
| 2 IT | 2020-14 | 5 IT-South     | 1 | 2 | ##### | ##### |

|    |      |         |                |   |   |          |          |  |
|----|------|---------|----------------|---|---|----------|----------|--|
| 1  |      |         |                |   |   |          |          |  |
| 2  |      |         |                |   |   |          |          |  |
| 3  | 2 IT | 2020-14 | 5 IT-South     | 1 | 3 | #####    | #####    |  |
| 4  | 2 IT | 2020-14 | 5 IT-South     | 1 | 4 | #####    | #####    |  |
| 5  | 2 IT | 2020-14 | 5 IT-South     | 1 | 5 | #####    | #####    |  |
| 6  | 2 IT | 2020-14 | 5 IT-South     | 2 | 1 | #####    | #####    |  |
| 7  | 2 IT | 2020-14 | 5 IT-South     | 2 | 2 | #####    | #####    |  |
| 8  | 2 IT | 2020-14 | 5 IT-South     | 2 | 3 | #####    | #####    |  |
| 9  | 2 IT | 2020-14 | 5 IT-South     | 2 | 4 | #####    | #####    |  |
| 10 | 2 IT | 2020-14 | 5 IT-South     | 2 | 5 | #####    | #####    |  |
| 11 | 2 IT | 2020-14 | 5 IT-South     | 3 | 1 | #####    | #####    |  |
| 12 | 2 IT | 2020-14 | 5 IT-South     | 3 | 2 | 0        | 0        |  |
| 13 | 2 IT | 2020-14 | 5 IT-South     | 3 | 3 | 1.133333 | #####    |  |
| 14 | 2 IT | 2020-14 | 5 IT-South     | 3 | 4 | 0.5      | #####    |  |
| 15 | 2 IT | 2020-14 | 5 IT-South     | 3 | 5 | 0.75     | #####    |  |
| 16 | 2 IT | 2020-15 | 1 IT-Central   | 1 | 1 | 2.842326 | #####    |  |
| 17 | 2 IT | 2020-15 | 1 IT-Central   | 1 | 2 | 2.649289 | #####    |  |
| 18 | 2 IT | 2020-15 | 1 IT-Central   | 1 | 3 | 3.164198 | #####    |  |
| 19 | 2 IT | 2020-15 | 1 IT-Central   | 1 | 4 | 3.27437  | #####    |  |
| 20 | 2 IT | 2020-15 | 1 IT-Central   | 1 | 5 | 1.837981 | #####    |  |
| 21 | 2 IT | 2020-15 | 1 IT-Central   | 2 | 1 | 3.064014 | #####    |  |
| 22 | 2 IT | 2020-15 | 1 IT-Central   | 2 | 2 | 2.576923 | #####    |  |
| 23 | 2 IT | 2020-15 | 1 IT-Central   | 2 | 3 | 3.238806 | #####    |  |
| 24 | 2 IT | 2020-15 | 1 IT-Central   | 2 | 4 | 3.875    | #####    |  |
| 25 | 2 IT | 2020-15 | 1 IT-Central   | 2 | 5 | 1.857143 | #####    |  |
| 26 | 2 IT | 2020-15 | 1 IT-Central   | 3 | 1 | 2.385282 | #####    |  |
| 27 | 2 IT | 2020-15 | 1 IT-Central   | 3 | 2 | 2.8      | #####    |  |
| 28 | 2 IT | 2020-15 | 1 IT-Central   | 3 | 3 | 3        | 1.24519  |  |
| 29 | 2 IT | 2020-15 | 1 IT-Central   | 3 | 4 | 2.083333 | #####    |  |
| 30 | 2 IT | 2020-15 | 1 IT-Central   | 3 | 5 | 1.8      | #####    |  |
| 31 | 2 IT | 2020-15 | 1 IT-Insular   | 1 | 1 | 2.308237 | #####    |  |
| 32 | 2 IT | 2020-15 | 1 IT-Insular   | 1 | 2 | 3.130079 | #####    |  |
| 33 | 2 IT | 2020-15 | 1 IT-Insular   | 1 | 3 | 2.394382 | #####    |  |
| 34 | 2 IT | 2020-15 | 1 IT-Insular   | 1 | 4 | 2.523633 | #####    |  |
| 35 | 2 IT | 2020-15 | 1 IT-Insular   | 1 | 5 | 1.367025 | #####    |  |
| 36 | 2 IT | 2020-15 | 1 IT-Insular   | 2 | 1 | 2.514973 | #####    |  |
| 37 | 2 IT | 2020-15 | 1 IT-Insular   | 2 | 2 | 3.357143 | #####    |  |
| 38 | 2 IT | 2020-15 | 1 IT-Insular   | 2 | 3 | 2.588235 | #####    |  |
| 39 | 2 IT | 2020-15 | 1 IT-Insular   | 2 | 4 | 2.777778 | #####    |  |
| 40 | 2 IT | 2020-15 | 1 IT-Insular   | 2 | 5 | 1.5      | #####    |  |
| 41 | 2 IT | 2020-15 | 1 IT-Insular   | 3 | 1 | 1.825912 | #####    |  |
| 42 | 2 IT | 2020-15 | 1 IT-Insular   | 3 | 2 | 2        | 0        |  |
| 43 | 2 IT | 2020-15 | 1 IT-Insular   | 3 | 3 | 2        | 1.049849 |  |
| 44 | 2 IT | 2020-15 | 1 IT-Insular   | 3 | 4 | 2        | 1.000065 |  |
| 45 | 2 IT | 2020-15 | 1 IT-Insular   | 3 | 5 | 1        | 0        |  |
| 46 | 2 IT | 2020-15 | 1 IT-Northeast | 1 | 1 | 3.406142 | #####    |  |
| 47 | 2 IT | 2020-15 | 1 IT-Northeast | 1 | 2 | 3.774012 | #####    |  |
| 48 | 2 IT | 2020-15 | 1 IT-Northeast | 1 | 3 | 3.60287  | #####    |  |
| 49 | 2 IT | 2020-15 | 1 IT-Northeast | 1 | 4 | 3.193611 | #####    |  |
| 50 | 2 IT | 2020-15 | 1 IT-Northeast | 1 | 5 | 3.137124 | #####    |  |
| 51 | 2 IT | 2020-15 | 1 IT-Northeast | 2 | 1 | 3.627305 | #####    |  |
| 52 | 2 IT | 2020-15 | 1 IT-Northeast | 2 | 2 | 3.027027 | #####    |  |
| 53 | 2 IT | 2020-15 | 1 IT-Northeast | 2 | 3 | 3.932203 | #####    |  |
| 54 | 2 IT | 2020-15 | 1 IT-Northeast | 2 | 4 | 3.589744 | #####    |  |
| 55 | 2 IT | 2020-15 | 1 IT-Northeast | 2 | 5 | 3.666667 | 1.186419 |  |
| 56 | 2 IT | 2020-15 | 1 IT-Northeast | 3 | 1 | 3.176415 | #####    |  |
| 57 | 2 IT | 2020-15 | 1 IT-Northeast | 3 | 2 | 4.636364 | 1.350158 |  |
| 58 | 2 IT | 2020-15 | 1 IT-Northeast | 3 | 3 | 3.305556 | #####    |  |
| 59 | 2 IT | 2020-15 | 1 IT-Northeast | 3 | 3 | 3.305556 | #####    |  |
| 60 | 2 IT | 2020-15 | 1 IT-Northeast | 3 | 3 | 3.305556 | #####    |  |

1  
2  
3  
4  
5  
6  
7  
8  
9  
10  
11  
12  
13  
14  
15  
16  
17  
18  
19  
20  
21  
22  
23  
24  
25  
26  
27  
28  
29  
30  
31  
32  
33  
34  
35  
36  
37  
38  
39  
40  
41  
42  
43  
44  
45  
46  
47  
48  
49  
50  
51  
52  
53  
54  
55  
56  
57  
58  
59  
60

|      |         |                |   |   |          |          |
|------|---------|----------------|---|---|----------|----------|
| 2 IT | 2020-15 | 1 IT-Northeast | 3 | 4 | 2.666667 | #####    |
| 2 IT | 2020-15 | 1 IT-Northeast | 3 | 5 | 2.7      | #####    |
| 2 IT | 2020-15 | 1 IT-Northwest | 1 | 1 | 2.61085  | #####    |
| 2 IT | 2020-15 | 1 IT-Northwest | 1 | 2 | 2.697192 | #####    |
| 2 IT | 2020-15 | 1 IT-Northwest | 1 | 3 | 3.080106 | #####    |
| 2 IT | 2020-15 | 1 IT-Northwest | 1 | 4 | 3.202006 | #####    |
| 2 IT | 2020-15 | 1 IT-Northwest | 1 | 5 | 1.714232 | #####    |
| 2 IT | 2020-15 | 1 IT-Northwest | 2 | 1 | 2.394649 | #####    |
| 2 IT | 2020-15 | 1 IT-Northwest | 2 | 2 | 3.030303 | #####    |
| 2 IT | 2020-15 | 1 IT-Northwest | 2 | 3 | 2.752809 | #####    |
| 2 IT | 2020-15 | 1 IT-Northwest | 2 | 4 | 2.837209 | #####    |
| 2 IT | 2020-15 | 1 IT-Northwest | 2 | 5 | 1.48     | #####    |
| 2 IT | 2020-15 | 1 IT-Northwest | 3 | 1 | 2.82265  | #####    |
| 2 IT | 2020-15 | 1 IT-Northwest | 3 | 2 | 2.333333 | #####    |
| 2 IT | 2020-15 | 1 IT-Northwest | 3 | 3 | 3.428571 | #####    |
| 2 IT | 2020-15 | 1 IT-Northwest | 3 | 4 | 3.555556 | #####    |
| 2 IT | 2020-15 | 1 IT-Northwest | 3 | 5 | 1.923077 | #####    |
| 2 IT | 2020-15 | 1 IT-Overall   | 1 | 1 | 2.954053 | #####    |
| 2 IT | 2020-15 | 1 IT-Overall   | 1 | 2 | 3.253425 | #####    |
| 2 IT | 2020-15 | 1 IT-Overall   | 1 | 3 | 3.354725 | #####    |
| 2 IT | 2020-15 | 1 IT-Overall   | 1 | 4 | 3.212217 | #####    |
| 2 IT | 2020-15 | 1 IT-Overall   | 1 | 5 | 2.032436 | #####    |
| 2 IT | 2020-15 | 1 IT-Overall   | 2 | 1 | 2.906051 | #####    |
| 2 IT | 2020-15 | 1 IT-Overall   | 2 | 2 | 2.903775 | #####    |
| 2 IT | 2020-15 | 1 IT-Overall   | 2 | 3 | 3.306574 | #####    |
| 2 IT | 2020-15 | 1 IT-Overall   | 2 | 4 | 3.23075  | #####    |
| 2 IT | 2020-15 | 1 IT-Overall   | 2 | 5 | 1.93923  | #####    |
| 2 IT | 2020-15 | 1 IT-Overall   | 3 | 1 | 3.021106 | #####    |
| 2 IT | 2020-15 | 1 IT-Overall   | 3 | 2 | 3.664583 | #####    |
| 2 IT | 2020-15 | 1 IT-Overall   | 3 | 3 | 3.434866 | #####    |
| 2 IT | 2020-15 | 1 IT-Overall   | 3 | 4 | 3.185621 | #####    |
| 2 IT | 2020-15 | 1 IT-Overall   | 3 | 5 | 2.143829 | #####    |
| 2 IT | 2020-15 | 1 IT-South     | 1 | 1 | 3.42276  | #####    |
| 2 IT | 2020-15 | 1 IT-South     | 1 | 2 | 3.887773 | 1.302951 |
| 2 IT | 2020-15 | 1 IT-South     | 1 | 3 | 4.271584 | #####    |
| 2 IT | 2020-15 | 1 IT-South     | 1 | 4 | 3.494776 | #####    |
| 2 IT | 2020-15 | 1 IT-South     | 1 | 5 | 2.254087 | #####    |
| 2 IT | 2020-15 | 1 IT-South     | 2 | 1 | 3.014467 | #####    |
| 2 IT | 2020-15 | 1 IT-South     | 2 | 2 | 2.625    | #####    |
| 2 IT | 2020-15 | 1 IT-South     | 2 | 3 | 3.825    | #####    |
| 2 IT | 2020-15 | 1 IT-South     | 2 | 4 | 2.956522 | #####    |
| 2 IT | 2020-15 | 1 IT-South     | 2 | 5 | 2        | #####    |
| 2 IT | 2020-15 | 1 IT-South     | 3 | 1 | 4.122842 | #####    |
| 2 IT | 2020-15 | 1 IT-South     | 3 | 2 | 4.571429 | 1.967796 |
| 2 IT | 2020-15 | 1 IT-South     | 3 | 3 | 6.666667 | 3.030904 |
| 2 IT | 2020-15 | 1 IT-South     | 3 | 4 | 4.333333 | 1.539701 |
| 2 IT | 2020-15 | 1 IT-South     | 3 | 5 | 2.6      | #####    |
| 2 IT | 2020-15 | 2 IT-Central   | 1 | 1 | 1.650002 | #####    |
| 2 IT | 2020-15 | 2 IT-Central   | 1 | 2 | 2.642696 | #####    |
| 2 IT | 2020-15 | 2 IT-Central   | 1 | 3 | 1.509922 | #####    |
| 2 IT | 2020-15 | 2 IT-Central   | 1 | 4 | 1.64407  | #####    |
| 2 IT | 2020-15 | 2 IT-Central   | 1 | 5 | 1.321407 | #####    |
| 2 IT | 2020-15 | 2 IT-Central   | 2 | 1 | 1.695189 | #####    |
| 2 IT | 2020-15 | 2 IT-Central   | 2 | 2 | 2.444444 | #####    |
| 2 IT | 2020-15 | 2 IT-Central   | 2 | 3 | 1.514706 | #####    |
| 2 IT | 2020-15 | 2 IT-Central   | 2 | 4 | 1.833333 | #####    |



|    |      |         |                |   |   |          |       |  |
|----|------|---------|----------------|---|---|----------|-------|--|
| 1  |      |         |                |   |   |          |       |  |
| 2  |      |         |                |   |   |          |       |  |
| 3  | 2 IT | 2020-15 | 2 IT-Central   | 2 | 5 | 1.375    | ##### |  |
| 4  | 2 IT | 2020-15 | 2 IT-Central   | 3 | 1 | 1.555931 | ##### |  |
| 5  | 2 IT | 2020-15 | 2 IT-Central   | 3 | 2 | 3        | ##### |  |
| 6  | 2 IT | 2020-15 | 2 IT-Central   | 3 | 3 | 1.5      | ##### |  |
| 7  | 2 IT | 2020-15 | 2 IT-Central   | 3 | 4 | 1.25     | ##### |  |
| 8  | 2 IT | 2020-15 | 2 IT-Central   | 3 | 5 | 1.2      | ##### |  |
| 9  | 2 IT | 2020-15 | 2 IT-Insular   | 1 | 1 | 1.587041 | ##### |  |
| 10 | 2 IT | 2020-15 | 2 IT-Insular   | 1 | 2 | 2.594778 | ##### |  |
| 11 | 2 IT | 2020-15 | 2 IT-Insular   | 1 | 3 | 1.534266 | ##### |  |
| 12 | 2 IT | 2020-15 | 2 IT-Insular   | 1 | 4 | 1.768701 | ##### |  |
| 13 | 2 IT | 2020-15 | 2 IT-Insular   | 1 | 5 | #####    | ##### |  |
| 14 | 2 IT | 2020-15 | 2 IT-Insular   | 2 | 1 | 1.623221 | ##### |  |
| 15 | 2 IT | 2020-15 | 2 IT-Insular   | 2 | 2 | 2.714286 | ##### |  |
| 16 | 2 IT | 2020-15 | 2 IT-Insular   | 2 | 3 | 1.583333 | ##### |  |
| 17 | 2 IT | 2020-15 | 2 IT-Insular   | 2 | 4 | 1.777778 | ##### |  |
| 18 | 2 IT | 2020-15 | 2 IT-Insular   | 2 | 5 | #####    | ##### |  |
| 19 | 2 IT | 2020-15 | 2 IT-Insular   | 3 | 1 | 1.500846 | ##### |  |
| 20 | 2 IT | 2020-15 | 2 IT-Insular   | 3 | 2 | 2        | 0     |  |
| 21 | 2 IT | 2020-15 | 2 IT-Insular   | 3 | 3 | 1.428571 | ##### |  |
| 22 | 2 IT | 2020-15 | 2 IT-Insular   | 3 | 4 | 1.75     | ##### |  |
| 23 | 2 IT | 2020-15 | 2 IT-Insular   | 3 | 5 | 1        | 0     |  |
| 24 | 2 IT | 2020-15 | 2 IT-Northeast | 1 | 1 | 1.651565 | ##### |  |
| 25 | 2 IT | 2020-15 | 2 IT-Northeast | 1 | 2 | 2.536305 | ##### |  |
| 26 | 2 IT | 2020-15 | 2 IT-Northeast | 1 | 3 | 1.583383 | ##### |  |
| 27 | 2 IT | 2020-15 | 2 IT-Northeast | 1 | 4 | 1.265917 | ##### |  |
| 28 | 2 IT | 2020-15 | 2 IT-Northeast | 1 | 5 | 1.809915 | ##### |  |
| 29 | 2 IT | 2020-15 | 2 IT-Northeast | 2 | 1 | 1.701999 | ##### |  |
| 30 | 2 IT | 2020-15 | 2 IT-Northeast | 2 | 2 | 2.605263 | ##### |  |
| 31 | 2 IT | 2020-15 | 2 IT-Northeast | 2 | 3 | 1.571429 | ##### |  |
| 32 | 2 IT | 2020-15 | 2 IT-Northeast | 2 | 4 | 1.422222 | ##### |  |
| 33 | 2 IT | 2020-15 | 2 IT-Northeast | 2 | 5 | 1.8      | ##### |  |
| 34 | 2 IT | 2020-15 | 2 IT-Northeast | 3 | 1 | 1.597365 | ##### |  |
| 35 | 2 IT | 2020-15 | 2 IT-Northeast | 3 | 2 | 2.454545 | ##### |  |
| 36 | 2 IT | 2020-15 | 2 IT-Northeast | 3 | 3 | 1.594595 | ##### |  |
| 37 | 2 IT | 2020-15 | 2 IT-Northeast | 3 | 4 | 1.05     | ##### |  |
| 38 | 2 IT | 2020-15 | 2 IT-Northeast | 3 | 5 | 1.818182 | ##### |  |
| 39 | 2 IT | 2020-15 | 2 IT-Northwest | 1 | 1 | 1.397464 | ##### |  |
| 40 | 2 IT | 2020-15 | 2 IT-Northwest | 1 | 2 | 2.179843 | ##### |  |
| 41 | 2 IT | 2020-15 | 2 IT-Northwest | 1 | 3 | 1.424878 | ##### |  |
| 42 | 2 IT | 2020-15 | 2 IT-Northwest | 1 | 4 | 1.366257 | ##### |  |
| 43 | 2 IT | 2020-15 | 2 IT-Northwest | 1 | 5 | 1.144049 | ##### |  |
| 44 | 2 IT | 2020-15 | 2 IT-Northwest | 2 | 1 | 1.312608 | ##### |  |
| 45 | 2 IT | 2020-15 | 2 IT-Northwest | 2 | 2 | 2.512821 | ##### |  |
| 46 | 2 IT | 2020-15 | 2 IT-Northwest | 2 | 3 | 1.438776 | ##### |  |
| 47 | 2 IT | 2020-15 | 2 IT-Northwest | 2 | 4 | 1.133333 | ##### |  |
| 48 | 2 IT | 2020-15 | 2 IT-Northwest | 2 | 5 | #####    | ##### |  |
| 49 | 2 IT | 2020-15 | 2 IT-Northwest | 3 | 1 | 1.482466 | ##### |  |
| 50 | 2 IT | 2020-15 | 2 IT-Northwest | 3 | 2 | 1.75     | ##### |  |
| 51 | 2 IT | 2020-15 | 2 IT-Northwest | 3 | 3 | 1.410256 | ##### |  |
| 52 | 2 IT | 2020-15 | 2 IT-Northwest | 3 | 4 | 1.586207 | ##### |  |
| 53 | 2 IT | 2020-15 | 2 IT-Northwest | 3 | 5 | 1.384615 | ##### |  |
| 54 | 2 IT | 2020-15 | 2 IT-Overall   | 1 | 1 | 1.602045 | ##### |  |
| 55 | 2 IT | 2020-15 | 2 IT-Overall   | 1 | 2 | 2.431676 | ##### |  |
| 56 | 2 IT | 2020-15 | 2 IT-Overall   | 1 | 3 | 1.573723 | ##### |  |
| 57 | 2 IT | 2020-15 | 2 IT-Overall   | 1 | 4 | 1.563566 | ##### |  |
| 58 | 2 IT | 2020-15 | 2 IT-Overall   | 1 | 5 | 1.292868 | ##### |  |
| 59 | 2 IT | 2020-15 | 2 IT-Overall   | 1 |   |          |       |  |
| 60 | 2 IT | 2020-15 | 2 IT-Overall   | 1 |   |          |       |  |

|    |      |         |                |   |   |          |          |  |  |
|----|------|---------|----------------|---|---|----------|----------|--|--|
| 1  |      |         |                |   |   |          |          |  |  |
| 2  |      |         |                |   |   |          |          |  |  |
| 3  | 2 IT | 2020-15 | 2 IT-Overall   | 2 | 1 | 1.595479 | #####    |  |  |
| 4  | 2 IT | 2020-15 | 2 IT-Overall   | 2 | 2 | 2.566804 | #####    |  |  |
| 5  | 2 IT | 2020-15 | 2 IT-Overall   | 2 | 3 | 1.634993 | #####    |  |  |
| 6  | 2 IT | 2020-15 | 2 IT-Overall   | 2 | 4 | 1.553131 | #####    |  |  |
| 7  | 2 IT | 2020-15 | 2 IT-Overall   | 2 | 5 | 1.149132 | #####    |  |  |
| 8  | 2 IT | 2020-15 | 2 IT-Overall   | 3 | 1 | 1.611222 | #####    |  |  |
| 9  | 2 IT | 2020-15 | 2 IT-Overall   | 3 | 2 | 2.271952 | #####    |  |  |
| 10 | 2 IT | 2020-15 | 2 IT-Overall   | 3 | 3 | 1.472675 | #####    |  |  |
| 11 | 2 IT | 2020-15 | 2 IT-Overall   | 3 | 4 | 1.578213 | #####    |  |  |
| 12 | 2 IT | 2020-15 | 2 IT-Overall   | 3 | 5 | 1.470991 | #####    |  |  |
| 13 | 2 IT | 2020-15 | 2 IT-South     | 1 | 1 | 1.800797 | #####    |  |  |
| 14 | 2 IT | 2020-15 | 2 IT-South     | 1 | 2 | 2.394857 | #####    |  |  |
| 15 | 2 IT | 2020-15 | 2 IT-South     | 1 | 3 | 1.876755 | #####    |  |  |
| 16 | 2 IT | 2020-15 | 2 IT-South     | 1 | 4 | 1.865625 | #####    |  |  |
| 17 | 2 IT | 2020-15 | 2 IT-South     | 1 | 5 | 1.318145 | #####    |  |  |
| 18 | 2 IT | 2020-15 | 2 IT-South     | 2 | 1 | 1.721963 | #####    |  |  |
| 19 | 2 IT | 2020-15 | 2 IT-South     | 2 | 2 | 2.666667 | 0.351387 |  |  |
| 20 | 2 IT | 2020-15 | 2 IT-South     | 2 | 3 | 1.97561  | #####    |  |  |
| 21 | 2 IT | 2020-15 | 2 IT-South     | 2 | 4 | 1.666667 | #####    |  |  |
| 22 | 2 IT | 2020-15 | 2 IT-South     | 2 | 5 | 1.111111 | #####    |  |  |
| 23 | 2 IT | 2020-15 | 2 IT-South     | 3 | 1 | 1.928649 | #####    |  |  |
| 24 | 2 IT | 2020-15 | 2 IT-South     | 3 | 2 | 2.25     | #####    |  |  |
| 25 | 2 IT | 2020-15 | 2 IT-South     | 3 | 3 | 1.333333 | 1.088733 |  |  |
| 26 | 2 IT | 2020-15 | 2 IT-South     | 3 | 4 | 2.142857 | #####    |  |  |
| 27 | 2 IT | 2020-15 | 2 IT-South     | 3 | 5 | 1.6      | #####    |  |  |
| 28 | 2 IT | 2020-15 | 3 IT-Central   | 1 | 1 | 0        | 0        |  |  |
| 29 | 2 IT | 2020-15 | 3 IT-Central   | 1 | 2 | 0        | 0        |  |  |
| 30 | 2 IT | 2020-15 | 3 IT-Central   | 1 | 3 | 0        | 0        |  |  |
| 31 | 2 IT | 2020-15 | 3 IT-Central   | 1 | 4 | 0        | 0        |  |  |
| 32 | 2 IT | 2020-15 | 3 IT-Central   | 1 | 5 | 0        | 0        |  |  |
| 33 | 2 IT | 2020-15 | 3 IT-Central   | 2 | 1 | 0        | 0        |  |  |
| 34 | 2 IT | 2020-15 | 3 IT-Central   | 2 | 2 | 0        | 0        |  |  |
| 35 | 2 IT | 2020-15 | 3 IT-Central   | 2 | 3 | 0        | 0        |  |  |
| 36 | 2 IT | 2020-15 | 3 IT-Central   | 2 | 4 | 0        | 0        |  |  |
| 37 | 2 IT | 2020-15 | 3 IT-Central   | 2 | 5 | 0        | 0        |  |  |
| 38 | 2 IT | 2020-15 | 3 IT-Central   | 3 | 1 | 0        | 0        |  |  |
| 39 | 2 IT | 2020-15 | 3 IT-Central   | 3 | 2 | 0        | 0        |  |  |
| 40 | 2 IT | 2020-15 | 3 IT-Central   | 3 | 3 | 0        | 0        |  |  |
| 41 | 2 IT | 2020-15 | 3 IT-Central   | 3 | 4 | 0        | 0        |  |  |
| 42 | 2 IT | 2020-15 | 3 IT-Central   | 3 | 5 | 0        | 0        |  |  |
| 43 | 2 IT | 2020-15 | 3 IT-Insular   | 1 | 1 | 0        | 0        |  |  |
| 44 | 2 IT | 2020-15 | 3 IT-Insular   | 1 | 2 | 0        | 0        |  |  |
| 45 | 2 IT | 2020-15 | 3 IT-Insular   | 1 | 3 | 0        | 0        |  |  |
| 46 | 2 IT | 2020-15 | 3 IT-Insular   | 1 | 4 | 0        | 0        |  |  |
| 47 | 2 IT | 2020-15 | 3 IT-Insular   | 1 | 5 | 0        | 0        |  |  |
| 48 | 2 IT | 2020-15 | 3 IT-Insular   | 2 | 1 | 0        | 0        |  |  |
| 49 | 2 IT | 2020-15 | 3 IT-Insular   | 2 | 2 | 0        | 0        |  |  |
| 50 | 2 IT | 2020-15 | 3 IT-Insular   | 2 | 3 | 0        | 0        |  |  |
| 51 | 2 IT | 2020-15 | 3 IT-Insular   | 2 | 4 | 0        | 0        |  |  |
| 52 | 2 IT | 2020-15 | 3 IT-Insular   | 2 | 5 | 0        | 0        |  |  |
| 53 | 2 IT | 2020-15 | 3 IT-Insular   | 3 | 1 | 0        | 0        |  |  |
| 54 | 2 IT | 2020-15 | 3 IT-Insular   | 3 | 2 | 0        | 0        |  |  |
| 55 | 2 IT | 2020-15 | 3 IT-Insular   | 3 | 3 | 0        | 0        |  |  |
| 56 | 2 IT | 2020-15 | 3 IT-Insular   | 3 | 4 | 0        | 0        |  |  |
| 57 | 2 IT | 2020-15 | 3 IT-Insular   | 3 | 5 | 0        | 0        |  |  |
| 58 | 2 IT | 2020-15 | 3 IT-Insular   | 3 | 5 | 0        | 0        |  |  |
| 59 | 2 IT | 2020-15 | 3 IT-Northeast | 1 | 1 | 0        | 0        |  |  |
| 60 | 2 IT | 2020-15 | 3 IT-Northeast | 1 | 1 | 0        | 0        |  |  |

|    |      |         |                |   |   |   |   |
|----|------|---------|----------------|---|---|---|---|
| 1  |      |         |                |   |   |   |   |
| 2  |      |         |                |   |   |   |   |
| 3  | 2 IT | 2020-15 | 3 IT-Northeast | 1 | 2 | 0 | 0 |
| 4  | 2 IT | 2020-15 | 3 IT-Northeast | 1 | 3 | 0 | 0 |
| 5  | 2 IT | 2020-15 | 3 IT-Northeast | 1 | 4 | 0 | 0 |
| 6  | 2 IT | 2020-15 | 3 IT-Northeast | 1 | 5 | 0 | 0 |
| 7  | 2 IT | 2020-15 | 3 IT-Northeast | 2 | 1 | 0 | 0 |
| 8  | 2 IT | 2020-15 | 3 IT-Northeast | 2 | 2 | 0 | 0 |
| 9  | 2 IT | 2020-15 | 3 IT-Northeast | 2 | 3 | 0 | 0 |
| 10 | 2 IT | 2020-15 | 3 IT-Northeast | 2 | 4 | 0 | 0 |
| 11 | 2 IT | 2020-15 | 3 IT-Northeast | 2 | 5 | 0 | 0 |
| 12 | 2 IT | 2020-15 | 3 IT-Northeast | 3 | 1 | 0 | 0 |
| 13 | 2 IT | 2020-15 | 3 IT-Northeast | 3 | 2 | 0 | 0 |
| 14 | 2 IT | 2020-15 | 3 IT-Northeast | 3 | 3 | 0 | 0 |
| 15 | 2 IT | 2020-15 | 3 IT-Northeast | 3 | 4 | 0 | 0 |
| 16 | 2 IT | 2020-15 | 3 IT-Northeast | 3 | 5 | 0 | 0 |
| 17 | 2 IT | 2020-15 | 3 IT-Northeast | 3 | 5 | 0 | 0 |
| 18 | 2 IT | 2020-15 | 3 IT-Northeast | 3 | 5 | 0 | 0 |
| 19 | 2 IT | 2020-15 | 3 IT-Northeast | 3 | 5 | 0 | 0 |
| 20 | 2 IT | 2020-15 | 3 IT-Northeast | 3 | 5 | 0 | 0 |
| 21 | 2 IT | 2020-15 | 3 IT-Northeast | 3 | 5 | 0 | 0 |
| 22 | 2 IT | 2020-15 | 3 IT-Northeast | 3 | 5 | 0 | 0 |
| 23 | 2 IT | 2020-15 | 3 IT-Northeast | 3 | 5 | 0 | 0 |
| 24 | 2 IT | 2020-15 | 3 IT-Northeast | 3 | 5 | 0 | 0 |
| 25 | 2 IT | 2020-15 | 3 IT-Northeast | 3 | 5 | 0 | 0 |
| 26 | 2 IT | 2020-15 | 3 IT-Northeast | 3 | 5 | 0 | 0 |
| 27 | 2 IT | 2020-15 | 3 IT-Northeast | 3 | 5 | 0 | 0 |
| 28 | 2 IT | 2020-15 | 3 IT-Northeast | 3 | 5 | 0 | 0 |
| 29 | 2 IT | 2020-15 | 3 IT-Northeast | 3 | 5 | 0 | 0 |
| 30 | 2 IT | 2020-15 | 3 IT-Northeast | 3 | 5 | 0 | 0 |
| 31 | 2 IT | 2020-15 | 3 IT-Northeast | 3 | 5 | 0 | 0 |
| 32 | 2 IT | 2020-15 | 3 IT-Northeast | 3 | 5 | 0 | 0 |
| 33 | 2 IT | 2020-15 | 3 IT-Overall   | 1 | 1 | 0 | 0 |
| 34 | 2 IT | 2020-15 | 3 IT-Overall   | 1 | 2 | 0 | 0 |
| 35 | 2 IT | 2020-15 | 3 IT-Overall   | 1 | 3 | 0 | 0 |
| 36 | 2 IT | 2020-15 | 3 IT-Overall   | 1 | 4 | 0 | 0 |
| 37 | 2 IT | 2020-15 | 3 IT-Overall   | 1 | 5 | 0 | 0 |
| 38 | 2 IT | 2020-15 | 3 IT-Overall   | 2 | 1 | 0 | 0 |
| 39 | 2 IT | 2020-15 | 3 IT-Overall   | 2 | 2 | 0 | 0 |
| 40 | 2 IT | 2020-15 | 3 IT-Overall   | 2 | 3 | 0 | 0 |
| 41 | 2 IT | 2020-15 | 3 IT-Overall   | 2 | 4 | 0 | 0 |
| 42 | 2 IT | 2020-15 | 3 IT-Overall   | 2 | 5 | 0 | 0 |
| 43 | 2 IT | 2020-15 | 3 IT-Overall   | 3 | 1 | 0 | 0 |
| 44 | 2 IT | 2020-15 | 3 IT-Overall   | 3 | 2 | 0 | 0 |
| 45 | 2 IT | 2020-15 | 3 IT-Overall   | 3 | 3 | 0 | 0 |
| 46 | 2 IT | 2020-15 | 3 IT-Overall   | 3 | 4 | 0 | 0 |
| 47 | 2 IT | 2020-15 | 3 IT-Overall   | 3 | 5 | 0 | 0 |
| 48 | 2 IT | 2020-15 | 3 IT-South     | 1 | 1 | 0 | 0 |
| 49 | 2 IT | 2020-15 | 3 IT-South     | 1 | 2 | 0 | 0 |
| 50 | 2 IT | 2020-15 | 3 IT-South     | 1 | 3 | 0 | 0 |
| 51 | 2 IT | 2020-15 | 3 IT-South     | 1 | 4 | 0 | 0 |
| 52 | 2 IT | 2020-15 | 3 IT-South     | 1 | 5 | 0 | 0 |
| 53 | 2 IT | 2020-15 | 3 IT-South     | 2 | 1 | 0 | 0 |
| 54 | 2 IT | 2020-15 | 3 IT-South     | 2 | 2 | 0 | 0 |
| 55 | 2 IT | 2020-15 | 3 IT-South     | 2 | 3 | 0 | 0 |
| 56 | 2 IT | 2020-15 | 3 IT-South     | 2 | 4 | 0 | 0 |
| 57 | 2 IT | 2020-15 | 3 IT-South     | 2 | 5 | 0 | 0 |
| 58 | 2 IT | 2020-15 | 3 IT-South     | 3 | 1 | 0 | 0 |
| 59 | 2 IT | 2020-15 | 3 IT-South     | 3 | 2 | 0 | 0 |
| 60 | 2 IT | 2020-15 | 3 IT-South     | 3 | 2 | 0 | 0 |

|    |      |         |                |   |   |          |         |  |
|----|------|---------|----------------|---|---|----------|---------|--|
| 1  |      |         |                |   |   |          |         |  |
| 2  |      |         |                |   |   |          |         |  |
| 3  | 2 IT | 2020-15 | 3 IT-South     | 3 | 3 | 0        | 0       |  |
| 4  | 2 IT | 2020-15 | 3 IT-South     | 3 | 4 | 0        | 0       |  |
| 5  | 2 IT | 2020-15 | 3 IT-South     | 3 | 5 | 0        | 0       |  |
| 6  | 2 IT | 2020-15 | 4 IT-Central   | 1 | 1 | #####    | #####   |  |
| 7  | 2 IT | 2020-15 | 4 IT-Central   | 1 | 2 | 0        | 0       |  |
| 8  | 2 IT | 2020-15 | 4 IT-Central   | 1 | 3 | #####    | #####   |  |
| 9  | 2 IT | 2020-15 | 4 IT-Central   | 1 | 4 | 1.019781 | #####   |  |
| 10 | 2 IT | 2020-15 | 4 IT-Central   | 1 | 5 | #####    | #####   |  |
| 11 | 2 IT | 2020-15 | 4 IT-Central   | 2 | 1 | #####    | #####   |  |
| 12 | 2 IT | 2020-15 | 4 IT-Central   | 2 | 2 | 0        | 0       |  |
| 13 | 2 IT | 2020-15 | 4 IT-Central   | 2 | 3 | #####    | #####   |  |
| 14 | 2 IT | 2020-15 | 4 IT-Central   | 2 | 4 | 1.45     | #####   |  |
| 15 | 2 IT | 2020-15 | 4 IT-Central   | 2 | 5 | 0.125    | #####   |  |
| 16 | 2 IT | 2020-15 | 4 IT-Central   | 3 | 1 | #####    | #####   |  |
| 17 | 2 IT | 2020-15 | 4 IT-Central   | 3 | 2 | 0        | 0       |  |
| 18 | 2 IT | 2020-15 | 4 IT-Central   | 3 | 3 | 1        | #####   |  |
| 19 | 2 IT | 2020-15 | 4 IT-Central   | 3 | 4 | #####    | #####   |  |
| 20 | 2 IT | 2020-15 | 4 IT-Central   | 3 | 5 | 0        | 0       |  |
| 21 | 2 IT | 2020-15 | 4 IT-Insular   | 1 | 1 | #####    | #####   |  |
| 22 | 2 IT | 2020-15 | 4 IT-Insular   | 1 | 2 | 0        | 0       |  |
| 23 | 2 IT | 2020-15 | 4 IT-Insular   | 1 | 3 | #####    | #####   |  |
| 24 | 2 IT | 2020-15 | 4 IT-Insular   | 1 | 4 | #####    | #####   |  |
| 25 | 2 IT | 2020-15 | 4 IT-Insular   | 1 | 5 | 0        | 0       |  |
| 26 | 2 IT | 2020-15 | 4 IT-Insular   | 2 | 1 | #####    | #####   |  |
| 27 | 2 IT | 2020-15 | 4 IT-Insular   | 2 | 2 | 0        | 0       |  |
| 28 | 2 IT | 2020-15 | 4 IT-Insular   | 2 | 3 | #####    | #####   |  |
| 29 | 2 IT | 2020-15 | 4 IT-Insular   | 2 | 4 | #####    | #####   |  |
| 30 | 2 IT | 2020-15 | 4 IT-Insular   | 2 | 5 | 0        | 0       |  |
| 31 | 2 IT | 2020-15 | 4 IT-Insular   | 3 | 1 | #####    | #####   |  |
| 32 | 2 IT | 2020-15 | 4 IT-Insular   | 3 | 2 | 0        | 0       |  |
| 33 | 2 IT | 2020-15 | 4 IT-Insular   | 3 | 3 | 0.5      | #####   |  |
| 34 | 2 IT | 2020-15 | 4 IT-Insular   | 3 | 4 | 0        | 0       |  |
| 35 | 2 IT | 2020-15 | 4 IT-Insular   | 3 | 5 | 0        | 0       |  |
| 36 | 2 IT | 2020-15 | 4 IT-Northeast | 1 | 1 | 1.114851 | #####   |  |
| 37 | 2 IT | 2020-15 | 4 IT-Northeast | 1 | 2 | 1.186221 | #####   |  |
| 38 | 2 IT | 2020-15 | 4 IT-Northeast | 1 | 3 | 1.325514 | #####   |  |
| 39 | 2 IT | 2020-15 | 4 IT-Northeast | 1 | 4 | 1.272357 | #####   |  |
| 40 | 2 IT | 2020-15 | 4 IT-Northeast | 1 | 5 | #####    | #####   |  |
| 41 | 2 IT | 2020-15 | 4 IT-Northeast | 2 | 1 | 1.38571  | #####   |  |
| 42 | 2 IT | 2020-15 | 4 IT-Northeast | 2 | 2 | #####    | #####   |  |
| 43 | 2 IT | 2020-15 | 4 IT-Northeast | 2 | 3 | 1.777778 | #####   |  |
| 44 | 2 IT | 2020-15 | 4 IT-Northeast | 2 | 4 | 1.659091 | #####   |  |
| 45 | 2 IT | 2020-15 | 4 IT-Northeast | 2 | 5 | 1.1      | #####   |  |
| 46 | 2 IT | 2020-15 | 4 IT-Northeast | 3 | 1 | #####    | #####   |  |
| 47 | 2 IT | 2020-15 | 4 IT-Northeast | 3 | 2 | 2.25     | 1.36495 |  |
| 48 | 2 IT | 2020-15 | 4 IT-Northeast | 3 | 3 | #####    | #####   |  |
| 49 | 2 IT | 2020-15 | 4 IT-Northeast | 3 | 4 | 0.75     | #####   |  |
| 50 | 2 IT | 2020-15 | 4 IT-Northeast | 3 | 5 | 0        | 0       |  |
| 51 | 2 IT | 2020-15 | 4 IT-Northwest | 1 | 1 | #####    | #####   |  |
| 52 | 2 IT | 2020-15 | 4 IT-Northwest | 1 | 2 | #####    | #####   |  |
| 53 | 2 IT | 2020-15 | 4 IT-Northwest | 1 | 3 | 1.151673 | #####   |  |
| 54 | 2 IT | 2020-15 | 4 IT-Northwest | 1 | 4 | 1.131852 | #####   |  |
| 55 | 2 IT | 2020-15 | 4 IT-Northwest | 1 | 5 | #####    | #####   |  |
| 56 | 2 IT | 2020-15 | 4 IT-Northwest | 2 | 1 | #####    | #####   |  |
| 57 | 2 IT | 2020-15 | 4 IT-Northwest | 2 | 2 | #####    | #####   |  |
| 58 | 2 IT | 2020-15 | 4 IT-Northwest | 2 | 3 | #####    | #####   |  |
| 59 | 2 IT | 2020-15 | 4 IT-Northwest | 2 | 4 | #####    | #####   |  |
| 60 | 2 IT | 2020-15 | 4 IT-Northwest | 2 | 5 | #####    | #####   |  |

|    |      |         |              |   |   |          |          |  |
|----|------|---------|--------------|---|---|----------|----------|--|
| 1  |      |         |              |   |   |          |          |  |
| 2  |      |         |              |   |   |          |          |  |
| 3  | 2 IT | 2020-15 | 4 IT-Northwe | 2 | 4 | 1.266667 | #####    |  |
| 4  | 2 IT | 2020-15 | 4 IT-Northwe | 2 | 5 | #####    | #####    |  |
| 5  | 2 IT | 2020-15 | 4 IT-Northwe | 3 | 1 | #####    | #####    |  |
| 6  | 2 IT | 2020-15 | 4 IT-Northwe | 3 | 2 | 0        | 0        |  |
| 7  | 2 IT | 2020-15 | 4 IT-Northwe | 3 | 3 | 1.324324 | #####    |  |
| 8  | 2 IT | 2020-15 | 4 IT-Northwe | 3 | 4 | 1        | #####    |  |
| 9  | 2 IT | 2020-15 | 4 IT-Northwe | 3 | 5 | #####    | #####    |  |
| 10 | 2 IT | 2020-15 | 4 IT-Overall | 1 | 1 | #####    | #####    |  |
| 11 | 2 IT | 2020-15 | 4 IT-Overall | 1 | 2 | #####    | #####    |  |
| 12 | 2 IT | 2020-15 | 4 IT-Overall | 1 | 3 | 1.195166 | #####    |  |
| 13 | 2 IT | 2020-15 | 4 IT-Overall | 1 | 4 | 1.243552 | #####    |  |
| 14 | 2 IT | 2020-15 | 4 IT-Overall | 1 | 5 | #####    | #####    |  |
| 15 | 2 IT | 2020-15 | 4 IT-Overall | 2 | 1 | #####    | #####    |  |
| 16 | 2 IT | 2020-15 | 4 IT-Overall | 2 | 2 | #####    | #####    |  |
| 17 | 2 IT | 2020-15 | 4 IT-Overall | 2 | 3 | 1.154395 | #####    |  |
| 18 | 2 IT | 2020-15 | 4 IT-Overall | 2 | 4 | 1.193912 | #####    |  |
| 19 | 2 IT | 2020-15 | 4 IT-Overall | 2 | 5 | #####    | #####    |  |
| 20 | 2 IT | 2020-15 | 4 IT-Overall | 3 | 1 | #####    | #####    |  |
| 21 | 2 IT | 2020-15 | 4 IT-Overall | 3 | 2 | 1.039471 | #####    |  |
| 22 | 2 IT | 2020-15 | 4 IT-Overall | 3 | 3 | 1.261242 | #####    |  |
| 23 | 2 IT | 2020-15 | 4 IT-Overall | 3 | 4 | 1.315109 | #####    |  |
| 24 | 2 IT | 2020-15 | 4 IT-Overall | 3 | 5 | #####    | #####    |  |
| 25 | 2 IT | 2020-15 | 4 IT-South   | 1 | 1 | 1.283521 | #####    |  |
| 26 | 2 IT | 2020-15 | 4 IT-South   | 1 | 2 | #####    | #####    |  |
| 27 | 2 IT | 2020-15 | 4 IT-South   | 1 | 3 | 1.877001 | #####    |  |
| 28 | 2 IT | 2020-15 | 4 IT-South   | 1 | 4 | 1.890215 | 1.079932 |  |
| 29 | 2 IT | 2020-15 | 4 IT-South   | 1 | 5 | #####    | #####    |  |
| 30 | 2 IT | 2020-15 | 4 IT-South   | 2 | 1 | #####    | #####    |  |
| 31 | 2 IT | 2020-15 | 4 IT-South   | 2 | 2 | 0        | 0        |  |
| 32 | 2 IT | 2020-15 | 4 IT-South   | 2 | 3 | 1.5      | #####    |  |
| 33 | 2 IT | 2020-15 | 4 IT-South   | 2 | 4 | 1        | #####    |  |
| 34 | 2 IT | 2020-15 | 4 IT-South   | 2 | 5 | 0        | 0        |  |
| 35 | 2 IT | 2020-15 | 4 IT-South   | 3 | 1 | 1.97005  | 1.080202 |  |
| 36 | 2 IT | 2020-15 | 4 IT-South   | 3 | 2 | 1.5      | 1.159278 |  |
| 37 | 2 IT | 2020-15 | 4 IT-South   | 3 | 3 | 4        | 3.266198 |  |
| 38 | 2 IT | 2020-15 | 4 IT-South   | 3 | 4 | 3.285714 | 2.608745 |  |
| 39 | 2 IT | 2020-15 | 4 IT-South   | 3 | 5 | #####    | #####    |  |
| 40 | 2 IT | 2020-15 | 5 IT-Central | 1 | 1 | #####    | #####    |  |
| 41 | 2 IT | 2020-15 | 5 IT-Central | 1 | 2 | #####    | #####    |  |
| 42 | 2 IT | 2020-15 | 5 IT-Central | 1 | 3 | #####    | #####    |  |
| 43 | 2 IT | 2020-15 | 5 IT-Central | 1 | 4 | #####    | #####    |  |
| 44 | 2 IT | 2020-15 | 5 IT-Central | 1 | 5 | #####    | #####    |  |
| 45 | 2 IT | 2020-15 | 5 IT-Central | 2 | 1 | #####    | #####    |  |
| 46 | 2 IT | 2020-15 | 5 IT-Central | 2 | 2 | 0.28125  | #####    |  |
| 47 | 2 IT | 2020-15 | 5 IT-Central | 2 | 3 | #####    | #####    |  |
| 48 | 2 IT | 2020-15 | 5 IT-Central | 2 | 4 | #####    | #####    |  |
| 49 | 2 IT | 2020-15 | 5 IT-Central | 2 | 5 | #####    | #####    |  |
| 50 | 2 IT | 2020-15 | 5 IT-Central | 3 | 1 | #####    | #####    |  |
| 51 | 2 IT | 2020-15 | 5 IT-Central | 3 | 2 | 0        | 0        |  |
| 52 | 2 IT | 2020-15 | 5 IT-Central | 3 | 3 | 0.75     | #####    |  |
| 53 | 2 IT | 2020-15 | 5 IT-Central | 3 | 4 | #####    | #####    |  |
| 54 | 2 IT | 2020-15 | 5 IT-Central | 3 | 5 | 0.6      | #####    |  |
| 55 | 2 IT | 2020-15 | 5 IT-Insular | 1 | 1 | #####    | #####    |  |
| 56 | 2 IT | 2020-15 | 5 IT-Insular | 1 | 2 | #####    | #####    |  |
| 57 | 2 IT | 2020-15 | 5 IT-Insular | 1 | 3 | #####    | #####    |  |
| 58 | 2 IT | 2020-15 | 5 IT-Insular | 1 | 4 | #####    | #####    |  |
| 59 | 2 IT | 2020-15 | 5 IT-Insular | 1 | 4 | #####    | #####    |  |
| 60 | 2 IT | 2020-15 | 5 IT-Insular | 1 | 4 | #####    | #####    |  |

1  
2  
3  
4  
5  
6  
7  
8  
9  
10  
11  
12  
13  
14  
15  
16  
17  
18  
19  
20  
21  
22  
23  
24  
25  
26  
27  
28  
29  
30  
31  
32  
33  
34  
35  
36  
37  
38  
39  
40  
41  
42  
43  
44  
45  
46  
47  
48  
49  
50  
51  
52  
53  
54  
55  
56  
57  
58  
59  
60

|      |         |                |   |   |          |       |
|------|---------|----------------|---|---|----------|-------|
| 2 IT | 2020-15 | 5 IT-Insular   | 1 | 5 | #####    | ##### |
| 2 IT | 2020-15 | 5 IT-Insular   | 2 | 1 | #####    | ##### |
| 2 IT | 2020-15 | 5 IT-Insular   | 2 | 2 | 1        | ##### |
| 2 IT | 2020-15 | 5 IT-Insular   | 2 | 3 | #####    | ##### |
| 2 IT | 2020-15 | 5 IT-Insular   | 2 | 4 | #####    | ##### |
| 2 IT | 2020-15 | 5 IT-Insular   | 2 | 5 | #####    | ##### |
| 2 IT | 2020-15 | 5 IT-Insular   | 3 | 1 | #####    | ##### |
| 2 IT | 2020-15 | 5 IT-Insular   | 3 | 2 | 0        | 0     |
| 2 IT | 2020-15 | 5 IT-Insular   | 3 | 3 | 0        | 0     |
| 2 IT | 2020-15 | 5 IT-Insular   | 3 | 4 | 0.25     | ##### |
| 2 IT | 2020-15 | 5 IT-Insular   | 3 | 5 | 0        | 0     |
| 2 IT | 2020-15 | 5 IT-Northeast | 1 | 1 | #####    | ##### |
| 2 IT | 2020-15 | 5 IT-Northeast | 1 | 2 | #####    | ##### |
| 2 IT | 2020-15 | 5 IT-Northeast | 1 | 3 | #####    | ##### |
| 2 IT | 2020-15 | 5 IT-Northeast | 1 | 4 | #####    | ##### |
| 2 IT | 2020-15 | 5 IT-Northeast | 1 | 5 | #####    | ##### |
| 2 IT | 2020-15 | 5 IT-Northeast | 2 | 1 | #####    | ##### |
| 2 IT | 2020-15 | 5 IT-Northeast | 2 | 2 | #####    | ##### |
| 2 IT | 2020-15 | 5 IT-Northeast | 2 | 3 | #####    | ##### |
| 2 IT | 2020-15 | 5 IT-Northeast | 2 | 4 | #####    | ##### |
| 2 IT | 2020-15 | 5 IT-Northeast | 2 | 5 | 0.5      | ##### |
| 2 IT | 2020-15 | 5 IT-Northeast | 3 | 1 | #####    | ##### |
| 2 IT | 2020-15 | 5 IT-Northeast | 3 | 2 | #####    | ##### |
| 2 IT | 2020-15 | 5 IT-Northeast | 3 | 3 | #####    | ##### |
| 2 IT | 2020-15 | 5 IT-Northeast | 3 | 4 | #####    | ##### |
| 2 IT | 2020-15 | 5 IT-Northeast | 3 | 5 | 1        | ##### |
| 2 IT | 2020-15 | 5 IT-Northwest | 1 | 1 | #####    | ##### |
| 2 IT | 2020-15 | 5 IT-Northwest | 1 | 2 | #####    | ##### |
| 2 IT | 2020-15 | 5 IT-Northwest | 1 | 3 | #####    | ##### |
| 2 IT | 2020-15 | 5 IT-Northwest | 1 | 4 | #####    | ##### |
| 2 IT | 2020-15 | 5 IT-Northwest | 1 | 5 | #####    | ##### |
| 2 IT | 2020-15 | 5 IT-Northwest | 2 | 1 | #####    | ##### |
| 2 IT | 2020-15 | 5 IT-Northwest | 2 | 2 | 0.275    | ##### |
| 2 IT | 2020-15 | 5 IT-Northwest | 2 | 3 | #####    | ##### |
| 2 IT | 2020-15 | 5 IT-Northwest | 2 | 4 | #####    | ##### |
| 2 IT | 2020-15 | 5 IT-Northwest | 2 | 5 | #####    | ##### |
| 2 IT | 2020-15 | 5 IT-Northwest | 3 | 1 | #####    | ##### |
| 2 IT | 2020-15 | 5 IT-Northwest | 3 | 2 | #####    | ##### |
| 2 IT | 2020-15 | 5 IT-Northwest | 3 | 3 | #####    | ##### |
| 2 IT | 2020-15 | 5 IT-Northwest | 3 | 4 | 1.137931 | ##### |
| 2 IT | 2020-15 | 5 IT-Northwest | 3 | 5 | #####    | ##### |
| 2 IT | 2020-15 | 5 IT-Overall   | 1 | 1 | #####    | ##### |
| 2 IT | 2020-15 | 5 IT-Overall   | 1 | 2 | #####    | ##### |
| 2 IT | 2020-15 | 5 IT-Overall   | 1 | 3 | #####    | ##### |
| 2 IT | 2020-15 | 5 IT-Overall   | 1 | 4 | #####    | ##### |
| 2 IT | 2020-15 | 5 IT-Overall   | 1 | 5 | #####    | ##### |
| 2 IT | 2020-15 | 5 IT-Overall   | 2 | 1 | #####    | ##### |
| 2 IT | 2020-15 | 5 IT-Overall   | 2 | 2 | #####    | ##### |
| 2 IT | 2020-15 | 5 IT-Overall   | 2 | 3 | #####    | ##### |
| 2 IT | 2020-15 | 5 IT-Overall   | 2 | 4 | #####    | ##### |
| 2 IT | 2020-15 | 5 IT-Overall   | 2 | 5 | #####    | ##### |
| 2 IT | 2020-15 | 5 IT-Overall   | 3 | 1 | #####    | ##### |
| 2 IT | 2020-15 | 5 IT-Overall   | 3 | 2 | #####    | ##### |
| 2 IT | 2020-15 | 5 IT-Overall   | 3 | 3 | #####    | ##### |
| 2 IT | 2020-15 | 5 IT-Overall   | 3 | 4 | 1.015857 | ##### |
| 2 IT | 2020-15 | 5 IT-Overall   | 3 | 5 | #####    | ##### |

|    |      |         |              |   |   |          |          |  |
|----|------|---------|--------------|---|---|----------|----------|--|
| 1  |      |         |              |   |   |          |          |  |
| 2  |      |         |              |   |   |          |          |  |
| 3  | 2 IT | 2020-15 | 5 IT-South   | 1 | 1 | #####    | #####    |  |
| 4  | 2 IT | 2020-15 | 5 IT-South   | 1 | 2 | #####    | #####    |  |
| 5  | 2 IT | 2020-15 | 5 IT-South   | 1 | 3 | #####    | #####    |  |
| 6  | 2 IT | 2020-15 | 5 IT-South   | 1 | 4 | 1.167851 | #####    |  |
| 7  | 2 IT | 2020-15 | 5 IT-South   | 1 | 5 | 1.175191 | #####    |  |
| 8  | 2 IT | 2020-15 | 5 IT-South   | 2 | 1 | #####    | #####    |  |
| 9  | 2 IT | 2020-15 | 5 IT-South   | 2 | 2 | #####    | #####    |  |
| 10 | 2 IT | 2020-15 | 5 IT-South   | 2 | 3 | 0.5      | #####    |  |
| 11 | 2 IT | 2020-15 | 5 IT-South   | 2 | 4 | #####    | #####    |  |
| 12 | 2 IT | 2020-15 | 5 IT-South   | 2 | 5 | #####    | #####    |  |
| 13 | 2 IT | 2020-15 | 5 IT-South   | 3 | 1 | 1.450694 | #####    |  |
| 14 | 2 IT | 2020-15 | 5 IT-South   | 3 | 2 | 1.125    | #####    |  |
| 15 | 2 IT | 2020-15 | 5 IT-South   | 3 | 3 | 1.333333 | #####    |  |
| 16 | 2 IT | 2020-15 | 5 IT-South   | 3 | 4 | 1.666667 | 1.071586 |  |
| 17 | 2 IT | 2020-15 | 5 IT-South   | 3 | 5 | 1.5      | #####    |  |
| 18 | 2 NL | 2020-14 | 1 NL-East Ne | 1 | 1 | 5.01194  | #####    |  |
| 19 | 2 NL | 2020-14 | 1 NL-East Ne | 1 | 2 | 6.789533 | 1.246562 |  |
| 20 | 2 NL | 2020-14 | 1 NL-East Ne | 1 | 3 | 6.639763 | #####    |  |
| 21 | 2 NL | 2020-14 | 1 NL-East Ne | 1 | 4 | 4.614527 | #####    |  |
| 22 | 2 NL | 2020-14 | 1 NL-East Ne | 1 | 5 | 1.723978 | #####    |  |
| 23 | 2 NL | 2020-14 | 1 NL-East Ne | 2 | 1 | 4.057935 | #####    |  |
| 24 | 2 NL | 2020-14 | 1 NL-East Ne | 2 | 2 | 5.190476 | #####    |  |
| 25 | 2 NL | 2020-14 | 1 NL-East Ne | 2 | 3 | 5.4125   | #####    |  |
| 26 | 2 NL | 2020-14 | 1 NL-East Ne | 2 | 4 | 4.171429 | #####    |  |
| 27 | 2 NL | 2020-14 | 1 NL-East Ne | 2 | 5 | 1.338983 | #####    |  |
| 28 | 2 NL | 2020-14 | 1 NL-East Ne | 3 | 1 | 6.07518  | #####    |  |
| 29 | 2 NL | 2020-14 | 1 NL-East Ne | 3 | 2 | 8.333333 | 2.237419 |  |
| 30 | 2 NL | 2020-14 | 1 NL-East Ne | 3 | 3 | 7.885714 | 1.165495 |  |
| 31 | 2 NL | 2020-14 | 1 NL-East Ne | 3 | 4 | 5.127273 | #####    |  |
| 32 | 2 NL | 2020-14 | 1 NL-East Ne | 3 | 5 | 2.25     | #####    |  |
| 33 | 2 NL | 2020-14 | 1 NL-North N | 1 | 1 | 4.314391 | #####    |  |
| 34 | 2 NL | 2020-14 | 1 NL-North N | 1 | 2 | 5.49137  | #####    |  |
| 35 | 2 NL | 2020-14 | 1 NL-North N | 1 | 3 | 4.880047 | #####    |  |
| 36 | 2 NL | 2020-14 | 1 NL-North N | 1 | 4 | 4.785978 | #####    |  |
| 37 | 2 NL | 2020-14 | 1 NL-North N | 1 | 5 | 2.024531 | #####    |  |
| 38 | 2 NL | 2020-14 | 1 NL-North N | 2 | 1 | 4.486428 | #####    |  |
| 39 | 2 NL | 2020-14 | 1 NL-North N | 2 | 2 | 6.047619 | #####    |  |
| 40 | 2 NL | 2020-14 | 1 NL-North N | 2 | 3 | 5.245614 | #####    |  |
| 41 | 2 NL | 2020-14 | 1 NL-North N | 2 | 4 | 4.952941 | #####    |  |
| 42 | 2 NL | 2020-14 | 1 NL-North N | 2 | 5 | 1.886364 | #####    |  |
| 43 | 2 NL | 2020-14 | 1 NL-North N | 3 | 1 | 4.131839 | #####    |  |
| 44 | 2 NL | 2020-14 | 1 NL-North N | 3 | 2 | 4.9      | 1.519754 |  |
| 45 | 2 NL | 2020-14 | 1 NL-North N | 3 | 3 | 4.5      | 1.030922 |  |
| 46 | 2 NL | 2020-14 | 1 NL-North N | 3 | 4 | 4.622642 | #####    |  |
| 47 | 2 NL | 2020-14 | 1 NL-North N | 3 | 5 | 2.193548 | #####    |  |
| 48 | 2 NL | 2020-14 | 1 NL-Overall | 1 | 1 | 4.230147 | #####    |  |
| 49 | 2 NL | 2020-14 | 1 NL-Overall | 1 | 2 | 5.179614 | #####    |  |
| 50 | 2 NL | 2020-14 | 1 NL-Overall | 1 | 3 | 4.851608 | #####    |  |
| 51 | 2 NL | 2020-14 | 1 NL-Overall | 1 | 4 | 4.598337 | #####    |  |
| 52 | 2 NL | 2020-14 | 1 NL-Overall | 1 | 5 | 2.130455 | #####    |  |
| 53 | 2 NL | 2020-14 | 1 NL-Overall | 2 | 1 | 3.950862 | #####    |  |
| 54 | 2 NL | 2020-14 | 1 NL-Overall | 2 | 2 | 5.19993  | #####    |  |
| 55 | 2 NL | 2020-14 | 1 NL-Overall | 2 | 3 | 4.484161 | #####    |  |
| 56 | 2 NL | 2020-14 | 1 NL-Overall | 2 | 4 | 4.33611  | #####    |  |
| 57 | 2 NL | 2020-14 | 1 NL-Overall | 2 | 5 | 1.845916 | #####    |  |
| 58 | 2 NL | 2020-14 | 1 NL-Overall | 3 | 1 | 4.559076 | #####    |  |
| 59 | 2 NL | 2020-14 | 1 NL-Overall | 3 |   |          |          |  |
| 60 | 2 NL | 2020-14 | 1 NL-Overall | 3 |   |          |          |  |

1  
2  
3  
4  
5  
6  
7  
8  
9  
10  
11  
12  
13  
14  
15  
16  
17  
18  
19  
20  
21  
22  
23  
24  
25  
26  
27  
28  
29  
30  
31  
32  
33  
34  
35  
36  
37  
38  
39  
40  
41  
42  
43  
44  
45  
46  
47  
48  
49  
50  
51  
52  
53  
54  
55  
56  
57  
58  
59  
60

|      |         |              |   |   |          |          |
|------|---------|--------------|---|---|----------|----------|
| 2 NL | 2020-14 | 1 NL-Overall | 3 | 2 | 5.157677 | #####    |
| 2 NL | 2020-14 | 1 NL-Overall | 3 | 3 | 5.300658 | #####    |
| 2 NL | 2020-14 | 1 NL-Overall | 3 | 4 | 4.889419 | #####    |
| 2 NL | 2020-14 | 1 NL-Overall | 3 | 5 | 2.504491 | #####    |
| 2 NL | 2020-14 | 1 NL-South N | 1 | 1 | 4.586391 | #####    |
| 2 NL | 2020-14 | 1 NL-South N | 1 | 2 | 5.929751 | #####    |
| 2 NL | 2020-14 | 1 NL-South N | 1 | 3 | 5.353853 | #####    |
| 2 NL | 2020-14 | 1 NL-South N | 1 | 4 | 5.023083 | #####    |
| 2 NL | 2020-14 | 1 NL-South N | 1 | 5 | 2.294112 | #####    |
| 2 NL | 2020-14 | 1 NL-South N | 2 | 1 | 4.175613 | #####    |
| 2 NL | 2020-14 | 1 NL-South N | 2 | 2 | 6.333333 | 1.01634  |
| 2 NL | 2020-14 | 1 NL-South N | 2 | 3 | 4.246753 | #####    |
| 2 NL | 2020-14 | 1 NL-South N | 2 | 4 | 4.862745 | #####    |
| 2 NL | 2020-14 | 1 NL-South N | 2 | 5 | 2        | #####    |
| 2 NL | 2020-14 | 1 NL-South N | 3 | 1 | 5.109738 | #####    |
| 2 NL | 2020-14 | 1 NL-South N | 3 | 2 | 5.5      | 1.3585   |
| 2 NL | 2020-14 | 1 NL-South N | 3 | 3 | 6.818182 | 1.547859 |
| 2 NL | 2020-14 | 1 NL-South N | 3 | 4 | 5.217391 | #####    |
| 2 NL | 2020-14 | 1 NL-South N | 3 | 5 | 2.731707 | #####    |
| 2 NL | 2020-14 | 1 NL-West N  | 1 | 1 | 3.611904 | #####    |
| 2 NL | 2020-14 | 1 NL-West N  | 1 | 2 | 3.816241 | #####    |
| 2 NL | 2020-14 | 1 NL-West N  | 1 | 3 | 3.62211  | #####    |
| 2 NL | 2020-14 | 1 NL-West N  | 1 | 4 | 4.352874 | #####    |
| 2 NL | 2020-14 | 1 NL-West N  | 1 | 5 | 2.274615 | #####    |
| 2 NL | 2020-14 | 1 NL-West N  | 2 | 1 | 3.652187 | #####    |
| 2 NL | 2020-14 | 1 NL-West N  | 2 | 2 | 4.404255 | #####    |
| 2 NL | 2020-14 | 1 NL-West N  | 2 | 3 | 3.983871 | #####    |
| 2 NL | 2020-14 | 1 NL-West N  | 2 | 4 | 4.026786 | #####    |
| 2 NL | 2020-14 | 1 NL-West N  | 2 | 5 | 2.013699 | #####    |
| 2 NL | 2020-14 | 1 NL-West N  | 3 | 1 | 3.563616 | #####    |
| 2 NL | 2020-14 | 1 NL-West N  | 3 | 2 | 3.133333 | #####    |
| 2 NL | 2020-14 | 1 NL-West N  | 3 | 3 | 3.130435 | #####    |
| 2 NL | 2020-14 | 1 NL-West N  | 3 | 4 | 4.704918 | #####    |
| 2 NL | 2020-14 | 1 NL-West N  | 3 | 5 | 2.59322  | #####    |
| 2 NL | 2020-14 | 2 NL-East Ne | 1 | 1 | 1.583381 | #####    |
| 2 NL | 2020-14 | 2 NL-East Ne | 1 | 2 | 2.023757 | #####    |
| 2 NL | 2020-14 | 2 NL-East Ne | 1 | 3 | 1.84599  | #####    |
| 2 NL | 2020-14 | 2 NL-East Ne | 1 | 4 | 1.505591 | #####    |
| 2 NL | 2020-14 | 2 NL-East Ne | 1 | 5 | #####    | #####    |
| 2 NL | 2020-14 | 2 NL-East Ne | 2 | 1 | 1.546668 | #####    |
| 2 NL | 2020-14 | 2 NL-East Ne | 2 | 2 | 1.652174 | #####    |
| 2 NL | 2020-14 | 2 NL-East Ne | 2 | 3 | 2.022989 | #####    |
| 2 NL | 2020-14 | 2 NL-East Ne | 2 | 4 | 1.5625   | #####    |
| 2 NL | 2020-14 | 2 NL-East Ne | 2 | 5 | #####    | #####    |
| 2 NL | 2020-14 | 2 NL-East Ne | 3 | 1 | 1.623118 | #####    |
| 2 NL | 2020-14 | 2 NL-East Ne | 3 | 2 | 2.416667 | #####    |
| 2 NL | 2020-14 | 2 NL-East Ne | 3 | 3 | 1.675    | #####    |
| 2 NL | 2020-14 | 2 NL-East Ne | 3 | 4 | 1.446154 | #####    |
| 2 NL | 2020-14 | 2 NL-East Ne | 3 | 5 | 1.055556 | #####    |
| 2 NL | 2020-14 | 2 NL-North N | 1 | 1 | 1.466829 | #####    |
| 2 NL | 2020-14 | 2 NL-North N | 1 | 2 | 1.978292 | #####    |
| 2 NL | 2020-14 | 2 NL-North N | 1 | 3 | 1.511913 | #####    |
| 2 NL | 2020-14 | 2 NL-North N | 1 | 4 | 1.495059 | #####    |
| 2 NL | 2020-14 | 2 NL-North N | 1 | 5 | #####    | #####    |
| 2 NL | 2020-14 | 2 NL-North N | 2 | 1 | 1.486379 | #####    |
| 2 NL | 2020-14 | 2 NL-North N | 2 | 2 | 1.87234  | #####    |



|    |      |         |              |   |   |          |       |  |
|----|------|---------|--------------|---|---|----------|-------|--|
| 1  |      |         |              |   |   |          |       |  |
| 2  |      |         |              |   |   |          |       |  |
| 3  | 2 NL | 2020-14 | 2 NL-North N | 2 | 3 | 1.698413 | ##### |  |
| 4  | 2 NL | 2020-14 | 2 NL-North N | 2 | 4 | 1.542553 | ##### |  |
| 5  | 2 NL | 2020-14 | 2 NL-North N | 2 | 5 | #####    | ##### |  |
| 6  | 2 NL | 2020-14 | 2 NL-North N | 3 | 1 | 1.446588 | ##### |  |
| 7  | 2 NL | 2020-14 | 2 NL-North N | 3 | 2 | 2.083333 | ##### |  |
| 8  | 2 NL | 2020-14 | 2 NL-North N | 3 | 3 | 1.333333 | ##### |  |
| 9  | 2 NL | 2020-14 | 2 NL-North N | 3 | 4 | 1.446429 | ##### |  |
| 10 | 2 NL | 2020-14 | 2 NL-North N | 3 | 5 | 0.96875  | ##### |  |
| 11 | 2 NL | 2020-14 | 2 NL-Overall | 1 | 1 | 1.594602 | ##### |  |
| 12 | 2 NL | 2020-14 | 2 NL-Overall | 1 | 2 | 2.169945 | ##### |  |
| 13 | 2 NL | 2020-14 | 2 NL-Overall | 1 | 3 | 1.768298 | ##### |  |
| 14 | 2 NL | 2020-14 | 2 NL-Overall | 1 | 4 | 1.484285 | ##### |  |
| 15 | 2 NL | 2020-14 | 2 NL-Overall | 1 | 5 | 1.049265 | ##### |  |
| 16 | 2 NL | 2020-14 | 2 NL-Overall | 2 | 1 | 1.596942 | ##### |  |
| 17 | 2 NL | 2020-14 | 2 NL-Overall | 2 | 2 | 1.982005 | ##### |  |
| 18 | 2 NL | 2020-14 | 2 NL-Overall | 2 | 3 | 1.905    | ##### |  |
| 19 | 2 NL | 2020-14 | 2 NL-Overall | 2 | 4 | 1.555398 | ##### |  |
| 20 | 2 NL | 2020-14 | 2 NL-Overall | 2 | 5 | #####    | ##### |  |
| 21 | 2 NL | 2020-14 | 2 NL-Overall | 3 | 1 | 1.591833 | ##### |  |
| 22 | 2 NL | 2020-14 | 2 NL-Overall | 3 | 2 | 2.375693 | ##### |  |
| 23 | 2 NL | 2020-14 | 2 NL-Overall | 3 | 3 | 1.606553 | ##### |  |
| 24 | 2 NL | 2020-14 | 2 NL-Overall | 3 | 4 | 1.403697 | ##### |  |
| 25 | 2 NL | 2020-14 | 2 NL-Overall | 3 | 5 | 1.159523 | ##### |  |
| 26 | 2 NL | 2020-14 | 2 NL-Overall | 3 | 5 | 1.159523 | ##### |  |
| 27 | 2 NL | 2020-14 | 2 NL-South N | 1 | 1 | 1.704132 | ##### |  |
| 28 | 2 NL | 2020-14 | 2 NL-South N | 1 | 2 | 2.634944 | ##### |  |
| 29 | 2 NL | 2020-14 | 2 NL-South N | 1 | 3 | 1.796013 | ##### |  |
| 30 | 2 NL | 2020-14 | 2 NL-South N | 1 | 4 | 1.481355 | ##### |  |
| 31 | 2 NL | 2020-14 | 2 NL-South N | 1 | 5 | 1.196083 | ##### |  |
| 32 | 2 NL | 2020-14 | 2 NL-South N | 2 | 1 | 1.687783 | ##### |  |
| 33 | 2 NL | 2020-14 | 2 NL-South N | 2 | 2 | 2.219512 | ##### |  |
| 34 | 2 NL | 2020-14 | 2 NL-South N | 2 | 3 | 2.023529 | ##### |  |
| 35 | 2 NL | 2020-14 | 2 NL-South N | 2 | 4 | 1.529915 | ##### |  |
| 36 | 2 NL | 2020-14 | 2 NL-South N | 2 | 5 | 1.184211 | ##### |  |
| 37 | 2 NL | 2020-14 | 2 NL-South N | 3 | 1 | 1.726244 | ##### |  |
| 38 | 2 NL | 2020-14 | 2 NL-South N | 3 | 2 | 3.1      | ##### |  |
| 39 | 2 NL | 2020-14 | 2 NL-South N | 3 | 3 | 1.478261 | ##### |  |
| 40 | 2 NL | 2020-14 | 2 NL-South N | 3 | 4 | 1.416667 | ##### |  |
| 41 | 2 NL | 2020-14 | 2 NL-South N | 3 | 5 | 1.214286 | ##### |  |
| 42 | 2 NL | 2020-14 | 2 NL-West N  | 1 | 1 | 1.580344 | ##### |  |
| 43 | 2 NL | 2020-14 | 2 NL-West N  | 1 | 2 | 2.061822 | ##### |  |
| 44 | 2 NL | 2020-14 | 2 NL-West N  | 1 | 3 | 1.773404 | ##### |  |
| 45 | 2 NL | 2020-14 | 2 NL-West N  | 1 | 4 | 1.471551 | ##### |  |
| 46 | 2 NL | 2020-14 | 2 NL-West N  | 1 | 5 | 1.073918 | ##### |  |
| 47 | 2 NL | 2020-14 | 2 NL-West N  | 2 | 1 | 1.602784 | ##### |  |
| 48 | 2 NL | 2020-14 | 2 NL-West N  | 2 | 2 | 2.061224 | ##### |  |
| 49 | 2 NL | 2020-14 | 2 NL-West N  | 2 | 3 | 1.835821 | ##### |  |
| 50 | 2 NL | 2020-14 | 2 NL-West N  | 2 | 4 | 1.566929 | ##### |  |
| 51 | 2 NL | 2020-14 | 2 NL-West N  | 2 | 5 | #####    | ##### |  |
| 52 | 2 NL | 2020-14 | 2 NL-West N  | 3 | 1 | 1.553284 | ##### |  |
| 53 | 2 NL | 2020-14 | 2 NL-West N  | 3 | 2 | 2.0625   | ##### |  |
| 54 | 2 NL | 2020-14 | 2 NL-West N  | 3 | 3 | 1.692308 | ##### |  |
| 55 | 2 NL | 2020-14 | 2 NL-West N  | 3 | 4 | 1.363636 | ##### |  |
| 56 | 2 NL | 2020-14 | 2 NL-West N  | 3 | 5 | 1.233333 | ##### |  |
| 57 | 2 NL | 2020-14 | 2 NL-West N  | 3 | 5 | 1.233333 | ##### |  |
| 58 | 2 NL | 2020-14 | 3 NL-East Ne | 1 | 1 | 0        | 0     |  |
| 59 | 2 NL | 2020-14 | 3 NL-East Ne | 1 | 2 | 0        | 0     |  |
| 60 | 2 NL | 2020-14 | 3 NL-East Ne | 1 | 3 | 0        | 0     |  |

|    |      |         |              |   |   |   |   |
|----|------|---------|--------------|---|---|---|---|
| 1  |      |         |              |   |   |   |   |
| 2  |      |         |              |   |   |   |   |
| 3  | 2 NL | 2020-14 | 3 NL-East Ne | 1 | 4 | 0 | 0 |
| 4  | 2 NL | 2020-14 | 3 NL-East Ne | 1 | 5 | 0 | 0 |
| 5  | 2 NL | 2020-14 | 3 NL-East Ne | 2 | 1 | 0 | 0 |
| 6  | 2 NL | 2020-14 | 3 NL-East Ne | 2 | 2 | 0 | 0 |
| 7  | 2 NL | 2020-14 | 3 NL-East Ne | 2 | 3 | 0 | 0 |
| 8  | 2 NL | 2020-14 | 3 NL-East Ne | 2 | 4 | 0 | 0 |
| 9  | 2 NL | 2020-14 | 3 NL-East Ne | 2 | 5 | 0 | 0 |
| 10 | 2 NL | 2020-14 | 3 NL-East Ne | 3 | 1 | 0 | 0 |
| 11 | 2 NL | 2020-14 | 3 NL-East Ne | 3 | 2 | 0 | 0 |
| 12 | 2 NL | 2020-14 | 3 NL-East Ne | 3 | 3 | 0 | 0 |
| 13 | 2 NL | 2020-14 | 3 NL-East Ne | 3 | 4 | 0 | 0 |
| 14 | 2 NL | 2020-14 | 3 NL-East Ne | 3 | 5 | 0 | 0 |
| 15 | 2 NL | 2020-14 | 3 NL-North N | 1 | 1 | 0 | 0 |
| 16 | 2 NL | 2020-14 | 3 NL-North N | 1 | 2 | 0 | 0 |
| 17 | 2 NL | 2020-14 | 3 NL-North N | 1 | 3 | 0 | 0 |
| 18 | 2 NL | 2020-14 | 3 NL-North N | 1 | 4 | 0 | 0 |
| 19 | 2 NL | 2020-14 | 3 NL-North N | 1 | 5 | 0 | 0 |
| 20 | 2 NL | 2020-14 | 3 NL-North N | 2 | 1 | 0 | 0 |
| 21 | 2 NL | 2020-14 | 3 NL-North N | 2 | 2 | 0 | 0 |
| 22 | 2 NL | 2020-14 | 3 NL-North N | 2 | 3 | 0 | 0 |
| 23 | 2 NL | 2020-14 | 3 NL-North N | 2 | 4 | 0 | 0 |
| 24 | 2 NL | 2020-14 | 3 NL-North N | 2 | 5 | 0 | 0 |
| 25 | 2 NL | 2020-14 | 3 NL-North N | 3 | 1 | 0 | 0 |
| 26 | 2 NL | 2020-14 | 3 NL-North N | 3 | 2 | 0 | 0 |
| 27 | 2 NL | 2020-14 | 3 NL-North N | 3 | 3 | 0 | 0 |
| 28 | 2 NL | 2020-14 | 3 NL-North N | 3 | 4 | 0 | 0 |
| 29 | 2 NL | 2020-14 | 3 NL-North N | 3 | 5 | 0 | 0 |
| 30 | 2 NL | 2020-14 | 3 NL-North N | 3 | 5 | 0 | 0 |
| 31 | 2 NL | 2020-14 | 3 NL-Overall | 1 | 1 | 0 | 0 |
| 32 | 2 NL | 2020-14 | 3 NL-Overall | 1 | 2 | 0 | 0 |
| 33 | 2 NL | 2020-14 | 3 NL-Overall | 1 | 3 | 0 | 0 |
| 34 | 2 NL | 2020-14 | 3 NL-Overall | 1 | 4 | 0 | 0 |
| 35 | 2 NL | 2020-14 | 3 NL-Overall | 1 | 5 | 0 | 0 |
| 36 | 2 NL | 2020-14 | 3 NL-Overall | 2 | 1 | 0 | 0 |
| 37 | 2 NL | 2020-14 | 3 NL-Overall | 2 | 2 | 0 | 0 |
| 38 | 2 NL | 2020-14 | 3 NL-Overall | 2 | 3 | 0 | 0 |
| 39 | 2 NL | 2020-14 | 3 NL-Overall | 2 | 4 | 0 | 0 |
| 40 | 2 NL | 2020-14 | 3 NL-Overall | 2 | 5 | 0 | 0 |
| 41 | 2 NL | 2020-14 | 3 NL-Overall | 3 | 1 | 0 | 0 |
| 42 | 2 NL | 2020-14 | 3 NL-Overall | 3 | 2 | 0 | 0 |
| 43 | 2 NL | 2020-14 | 3 NL-Overall | 3 | 3 | 0 | 0 |
| 44 | 2 NL | 2020-14 | 3 NL-Overall | 3 | 4 | 0 | 0 |
| 45 | 2 NL | 2020-14 | 3 NL-Overall | 3 | 5 | 0 | 0 |
| 46 | 2 NL | 2020-14 | 3 NL-South N | 1 | 1 | 0 | 0 |
| 47 | 2 NL | 2020-14 | 3 NL-South N | 1 | 2 | 0 | 0 |
| 48 | 2 NL | 2020-14 | 3 NL-South N | 1 | 3 | 0 | 0 |
| 49 | 2 NL | 2020-14 | 3 NL-South N | 1 | 4 | 0 | 0 |
| 50 | 2 NL | 2020-14 | 3 NL-South N | 1 | 5 | 0 | 0 |
| 51 | 2 NL | 2020-14 | 3 NL-South N | 2 | 1 | 0 | 0 |
| 52 | 2 NL | 2020-14 | 3 NL-South N | 2 | 2 | 0 | 0 |
| 53 | 2 NL | 2020-14 | 3 NL-South N | 2 | 3 | 0 | 0 |
| 54 | 2 NL | 2020-14 | 3 NL-South N | 2 | 4 | 0 | 0 |
| 55 | 2 NL | 2020-14 | 3 NL-South N | 2 | 5 | 0 | 0 |
| 56 | 2 NL | 2020-14 | 3 NL-South N | 3 | 1 | 0 | 0 |
| 57 | 2 NL | 2020-14 | 3 NL-South N | 3 | 2 | 0 | 0 |
| 58 | 2 NL | 2020-14 | 3 NL-South N | 3 | 3 | 0 | 0 |
| 59 | 2 NL | 2020-14 | 3 NL-South N | 3 | 4 | 0 | 0 |
| 60 | 2 NL | 2020-14 | 3 NL-South N | 3 | 4 | 0 | 0 |

|    |      |         |              |   |   |          |          |  |
|----|------|---------|--------------|---|---|----------|----------|--|
| 1  |      |         |              |   |   |          |          |  |
| 2  |      |         |              |   |   |          |          |  |
| 3  | 2 NL | 2020-14 | 3 NL-South N | 3 | 5 | 0        | 0        |  |
| 4  | 2 NL | 2020-14 | 3 NL-West N  | 1 | 1 | 0        | 0        |  |
| 5  | 2 NL | 2020-14 | 3 NL-West N  | 1 | 2 | 0        | 0        |  |
| 6  | 2 NL | 2020-14 | 3 NL-West N  | 1 | 3 | 0        | 0        |  |
| 7  | 2 NL | 2020-14 | 3 NL-West N  | 1 | 4 | 0        | 0        |  |
| 8  | 2 NL | 2020-14 | 3 NL-West N  | 1 | 5 | 0        | 0        |  |
| 9  | 2 NL | 2020-14 | 3 NL-West N  | 2 | 1 | 0        | 0        |  |
| 10 | 2 NL | 2020-14 | 3 NL-West N  | 2 | 2 | 0        | 0        |  |
| 11 | 2 NL | 2020-14 | 3 NL-West N  | 2 | 3 | 0        | 0        |  |
| 12 | 2 NL | 2020-14 | 3 NL-West N  | 2 | 4 | 0        | 0        |  |
| 13 | 2 NL | 2020-14 | 3 NL-West N  | 2 | 5 | 0        | 0        |  |
| 14 | 2 NL | 2020-14 | 3 NL-West N  | 3 | 1 | 0        | 0        |  |
| 15 | 2 NL | 2020-14 | 3 NL-West N  | 3 | 2 | 0        | 0        |  |
| 16 | 2 NL | 2020-14 | 3 NL-West N  | 3 | 3 | 0        | 0        |  |
| 17 | 2 NL | 2020-14 | 3 NL-West N  | 3 | 4 | 0        | 0        |  |
| 18 | 2 NL | 2020-14 | 3 NL-West N  | 3 | 5 | 0        | 0        |  |
| 19 | 2 NL | 2020-14 | 4 NL-East Ne | 1 | 1 | 2.585914 | #####    |  |
| 20 | 2 NL | 2020-14 | 4 NL-East Ne | 1 | 2 | 4.000066 | 1.0271   |  |
| 21 | 2 NL | 2020-14 | 4 NL-East Ne | 1 | 3 | 3.568611 | #####    |  |
| 22 | 2 NL | 2020-14 | 4 NL-East Ne | 1 | 4 | 2.239865 | #####    |  |
| 23 | 2 NL | 2020-14 | 4 NL-East Ne | 1 | 5 | #####    | #####    |  |
| 24 | 2 NL | 2020-14 | 4 NL-East Ne | 2 | 1 | 1.779294 | #####    |  |
| 25 | 2 NL | 2020-14 | 4 NL-East Ne | 2 | 2 | 2.22449  | #####    |  |
| 26 | 2 NL | 2020-14 | 4 NL-East Ne | 2 | 3 | 2.782609 | #####    |  |
| 27 | 2 NL | 2020-14 | 4 NL-East Ne | 2 | 4 | 1.762712 | #####    |  |
| 28 | 2 NL | 2020-14 | 4 NL-East Ne | 2 | 5 | #####    | #####    |  |
| 29 | 2 NL | 2020-14 | 4 NL-East Ne | 3 | 1 | 3.464248 | #####    |  |
| 30 | 2 NL | 2020-14 | 4 NL-East Ne | 3 | 2 | 5.714286 | 1.830918 |  |
| 31 | 2 NL | 2020-14 | 4 NL-East Ne | 3 | 3 | 4.333333 | #####    |  |
| 32 | 2 NL | 2020-14 | 4 NL-East Ne | 3 | 4 | 2.790323 | #####    |  |
| 33 | 2 NL | 2020-14 | 4 NL-East Ne | 3 | 5 | #####    | #####    |  |
| 34 | 2 NL | 2020-14 | 4 NL-North N | 1 | 1 | 2.047614 | #####    |  |
| 35 | 2 NL | 2020-14 | 4 NL-North N | 1 | 2 | 2.738633 | #####    |  |
| 36 | 2 NL | 2020-14 | 4 NL-North N | 1 | 3 | 2.312315 | #####    |  |
| 37 | 2 NL | 2020-14 | 4 NL-North N | 1 | 4 | 2.611991 | #####    |  |
| 38 | 2 NL | 2020-14 | 4 NL-North N | 1 | 5 | #####    | #####    |  |
| 39 | 2 NL | 2020-14 | 4 NL-North N | 2 | 1 | 1.958945 | #####    |  |
| 40 | 2 NL | 2020-14 | 4 NL-North N | 2 | 2 | 2.862745 | #####    |  |
| 41 | 2 NL | 2020-14 | 4 NL-North N | 2 | 3 | 2.507937 | #####    |  |
| 42 | 2 NL | 2020-14 | 4 NL-North N | 2 | 4 | 2.378947 | #####    |  |
| 43 | 2 NL | 2020-14 | 4 NL-North N | 2 | 5 | 0        | 0        |  |
| 44 | 2 NL | 2020-14 | 4 NL-North N | 3 | 1 | 2.138476 | #####    |  |
| 45 | 2 NL | 2020-14 | 4 NL-North N | 3 | 2 | 2.615385 | 1.453781 |  |
| 46 | 2 NL | 2020-14 | 4 NL-North N | 3 | 3 | 2.125    | #####    |  |
| 47 | 2 NL | 2020-14 | 4 NL-North N | 3 | 4 | 2.844828 | #####    |  |
| 48 | 2 NL | 2020-14 | 4 NL-North N | 3 | 5 | 0.5      | #####    |  |
| 49 | 2 NL | 2020-14 | 4 NL-Overall | 1 | 1 | 1.920645 | #####    |  |
| 50 | 2 NL | 2020-14 | 4 NL-Overall | 1 | 2 | 2.201775 | #####    |  |
| 51 | 2 NL | 2020-14 | 4 NL-Overall | 1 | 3 | 2.442382 | #####    |  |
| 52 | 2 NL | 2020-14 | 4 NL-Overall | 1 | 4 | 2.412162 | #####    |  |
| 53 | 2 NL | 2020-14 | 4 NL-Overall | 1 | 5 | #####    | #####    |  |
| 54 | 2 NL | 2020-14 | 4 NL-Overall | 2 | 1 | 1.640728 | #####    |  |
| 55 | 2 NL | 2020-14 | 4 NL-Overall | 2 | 2 | 2.011248 | #####    |  |
| 56 | 2 NL | 2020-14 | 4 NL-Overall | 2 | 3 | 2.225506 | #####    |  |
| 57 | 2 NL | 2020-14 | 4 NL-Overall | 2 | 4 | 2.009376 | #####    |  |
| 58 | 2 NL | 2020-14 | 4 NL-Overall | 2 | 5 | #####    | #####    |  |
| 59 | 2 NL | 2020-14 | 4 NL-Overall | 2 | 5 | #####    | #####    |  |
| 60 | 2 NL | 2020-14 | 4 NL-Overall | 2 | 5 | #####    | #####    |  |

|    |      |         |              |   |   |          |          |  |
|----|------|---------|--------------|---|---|----------|----------|--|
| 1  |      |         |              |   |   |          |          |  |
| 2  |      |         |              |   |   |          |          |  |
| 3  | 2 NL | 2020-14 | 4 NL-Overall | 3 | 1 | 2.24882  | #####    |  |
| 4  | 2 NL | 2020-14 | 4 NL-Overall | 3 | 2 | 2.40431  | #####    |  |
| 5  | 2 NL | 2020-14 | 4 NL-Overall | 3 | 3 | 2.711554 | 0.443343 |  |
| 6  | 2 NL | 2020-14 | 4 NL-Overall | 3 | 4 | 2.859088 | #####    |  |
| 7  | 2 NL | 2020-14 | 4 NL-Overall | 3 | 5 | #####    | #####    |  |
| 8  | 2 NL | 2020-14 | 4 NL-South N | 1 | 1 | 1.944039 | #####    |  |
| 9  | 2 NL | 2020-14 | 4 NL-South N | 1 | 2 | 2.252402 | #####    |  |
| 10 | 2 NL | 2020-14 | 4 NL-South N | 1 | 3 | 2.755921 | #####    |  |
| 11 | 2 NL | 2020-14 | 4 NL-South N | 1 | 4 | 2.488184 | #####    |  |
| 12 | 2 NL | 2020-14 | 4 NL-South N | 1 | 5 | #####    | #####    |  |
| 13 | 2 NL | 2020-14 | 4 NL-South N | 2 | 1 | 1.589225 | #####    |  |
| 14 | 2 NL | 2020-14 | 4 NL-South N | 2 | 2 | 2.795455 | #####    |  |
| 15 | 2 NL | 2020-14 | 4 NL-South N | 2 | 3 | 1.813953 | #####    |  |
| 16 | 2 NL | 2020-14 | 4 NL-South N | 2 | 4 | 2.106195 | #####    |  |
| 17 | 2 NL | 2020-14 | 4 NL-South N | 2 | 5 | 0        | 0        |  |
| 18 | 2 NL | 2020-14 | 4 NL-South N | 3 | 1 | 2.4134   | #####    |  |
| 19 | 2 NL | 2020-14 | 4 NL-South N | 3 | 2 | 1.6      | #####    |  |
| 20 | 2 NL | 2020-14 | 4 NL-South N | 3 | 3 | 4.086957 | 1.206507 |  |
| 21 | 2 NL | 2020-14 | 4 NL-South N | 3 | 4 | 2.96     | #####    |  |
| 22 | 2 NL | 2020-14 | 4 NL-South N | 3 | 5 | #####    | #####    |  |
| 23 | 2 NL | 2020-14 | 4 NL-South N | 3 | 5 | #####    | #####    |  |
| 24 | 2 NL | 2020-14 | 4 NL-West N  | 1 | 1 | 1.521128 | #####    |  |
| 25 | 2 NL | 2020-14 | 4 NL-West N  | 1 | 2 | 1.145608 | #####    |  |
| 26 | 2 NL | 2020-14 | 4 NL-West N  | 1 | 3 | 1.651651 | #####    |  |
| 27 | 2 NL | 2020-14 | 4 NL-West N  | 1 | 4 | 2.418786 | #####    |  |
| 28 | 2 NL | 2020-14 | 4 NL-West N  | 1 | 5 | #####    | #####    |  |
| 29 | 2 NL | 2020-14 | 4 NL-West N  | 2 | 1 | 1.519693 | #####    |  |
| 30 | 2 NL | 2020-14 | 4 NL-West N  | 2 | 2 | 1.327586 | #####    |  |
| 31 | 2 NL | 2020-14 | 4 NL-West N  | 2 | 3 | 2.072464 | #####    |  |
| 32 | 2 NL | 2020-14 | 4 NL-West N  | 2 | 4 | 2.007874 | #####    |  |
| 33 | 2 NL | 2020-14 | 4 NL-West N  | 2 | 5 | #####    | #####    |  |
| 34 | 2 NL | 2020-14 | 4 NL-West N  | 3 | 1 | 1.52284  | #####    |  |
| 35 | 2 NL | 2020-14 | 4 NL-West N  | 3 | 2 | 0.95     | #####    |  |
| 36 | 2 NL | 2020-14 | 4 NL-West N  | 3 | 3 | 1.041667 | #####    |  |
| 37 | 2 NL | 2020-14 | 4 NL-West N  | 3 | 4 | 2.857143 | #####    |  |
| 38 | 2 NL | 2020-14 | 4 NL-West N  | 3 | 5 | 0.375    | #####    |  |
| 39 | 2 NL | 2020-14 | 5 NL-East Ne | 1 | 1 | 1.044268 | #####    |  |
| 40 | 2 NL | 2020-14 | 5 NL-East Ne | 1 | 2 | 1.206368 | #####    |  |
| 41 | 2 NL | 2020-14 | 5 NL-East Ne | 1 | 3 | 1.310407 | #####    |  |
| 42 | 2 NL | 2020-14 | 5 NL-East Ne | 1 | 4 | #####    | #####    |  |
| 43 | 2 NL | 2020-14 | 5 NL-East Ne | 1 | 5 | #####    | #####    |  |
| 44 | 2 NL | 2020-14 | 5 NL-East Ne | 2 | 1 | #####    | #####    |  |
| 45 | 2 NL | 2020-14 | 5 NL-East Ne | 2 | 2 | 1.254902 | #####    |  |
| 46 | 2 NL | 2020-14 | 5 NL-East Ne | 2 | 3 | #####    | #####    |  |
| 47 | 2 NL | 2020-14 | 5 NL-East Ne | 2 | 4 | #####    | #####    |  |
| 48 | 2 NL | 2020-14 | 5 NL-East Ne | 2 | 5 | #####    | #####    |  |
| 49 | 2 NL | 2020-14 | 5 NL-East Ne | 3 | 1 | 1.274158 | #####    |  |
| 50 | 2 NL | 2020-14 | 5 NL-East Ne | 3 | 2 | 1.153846 | #####    |  |
| 51 | 2 NL | 2020-14 | 5 NL-East Ne | 3 | 3 | 1.837838 | #####    |  |
| 52 | 2 NL | 2020-14 | 5 NL-East Ne | 3 | 4 | 1.032787 | #####    |  |
| 53 | 2 NL | 2020-14 | 5 NL-East Ne | 3 | 5 | #####    | #####    |  |
| 54 | 2 NL | 2020-14 | 5 NL-North N | 1 | 1 | 1.070516 | #####    |  |
| 55 | 2 NL | 2020-14 | 5 NL-North N | 1 | 2 | 1.090745 | #####    |  |
| 56 | 2 NL | 2020-14 | 5 NL-North N | 1 | 3 | 1.144884 | #####    |  |
| 57 | 2 NL | 2020-14 | 5 NL-North N | 1 | 4 | 1.017955 | #####    |  |
| 58 | 2 NL | 2020-14 | 5 NL-North N | 1 | 5 | 1.04306  | #####    |  |
| 59 | 2 NL | 2020-14 | 5 NL-North N | 1 | 5 | 1.04306  | #####    |  |
| 60 | 2 NL | 2020-14 | 5 NL-North N | 2 | 1 | 1.111778 | #####    |  |

|    |      |         |              |   |   |          |       |  |
|----|------|---------|--------------|---|---|----------|-------|--|
| 1  |      |         |              |   |   |          |       |  |
| 2  |      |         |              |   |   |          |       |  |
| 3  | 2 NL | 2020-14 | 5 NL-North N | 2 | 2 | 1.5      | ##### |  |
| 4  | 2 NL | 2020-14 | 5 NL-North N | 2 | 3 | #####    | ##### |  |
| 5  | 2 NL | 2020-14 | 5 NL-North N | 2 | 4 | 1.105263 | ##### |  |
| 6  | 2 NL | 2020-14 | 5 NL-North N | 2 | 5 | 1.130435 | ##### |  |
| 7  | 2 NL | 2020-14 | 5 NL-North N | 3 | 1 | 1.027538 | ##### |  |
| 8  | 2 NL | 2020-14 | 5 NL-North N | 3 | 2 | #####    | ##### |  |
| 9  | 2 NL | 2020-14 | 5 NL-North N | 3 | 3 | 1.5      | ##### |  |
| 10 | 2 NL | 2020-14 | 5 NL-North N | 3 | 4 | #####    | ##### |  |
| 11 | 2 NL | 2020-14 | 5 NL-North N | 3 | 5 | #####    | ##### |  |
| 12 | 2 NL | 2020-14 | 5 NL-Overall | 1 | 1 | #####    | ##### |  |
| 13 | 2 NL | 2020-14 | 5 NL-Overall | 1 | 2 | #####    | ##### |  |
| 14 | 2 NL | 2020-14 | 5 NL-Overall | 1 | 3 | #####    | ##### |  |
| 15 | 2 NL | 2020-14 | 5 NL-Overall | 1 | 4 | #####    | ##### |  |
| 16 | 2 NL | 2020-14 | 5 NL-Overall | 1 | 5 | #####    | ##### |  |
| 17 | 2 NL | 2020-14 | 5 NL-Overall | 2 | 1 | #####    | ##### |  |
| 18 | 2 NL | 2020-14 | 5 NL-Overall | 2 | 2 | 1.110228 | ##### |  |
| 19 | 2 NL | 2020-14 | 5 NL-Overall | 2 | 3 | #####    | ##### |  |
| 20 | 2 NL | 2020-14 | 5 NL-Overall | 2 | 4 | #####    | ##### |  |
| 21 | 2 NL | 2020-14 | 5 NL-Overall | 2 | 5 | #####    | ##### |  |
| 22 | 2 NL | 2020-14 | 5 NL-Overall | 3 | 1 | #####    | ##### |  |
| 23 | 2 NL | 2020-14 | 5 NL-Overall | 3 | 2 | #####    | ##### |  |
| 24 | 2 NL | 2020-14 | 5 NL-Overall | 3 | 3 | 1.045296 | ##### |  |
| 25 | 2 NL | 2020-14 | 5 NL-Overall | 3 | 4 | #####    | ##### |  |
| 26 | 2 NL | 2020-14 | 5 NL-Overall | 3 | 5 | #####    | ##### |  |
| 27 | 2 NL | 2020-14 | 5 NL-Overall | 3 | 5 | #####    | ##### |  |
| 28 | 2 NL | 2020-14 | 5 NL-South N | 1 | 1 | #####    | ##### |  |
| 29 | 2 NL | 2020-14 | 5 NL-South N | 1 | 2 | #####    | ##### |  |
| 30 | 2 NL | 2020-14 | 5 NL-South N | 1 | 3 | #####    | ##### |  |
| 31 | 2 NL | 2020-14 | 5 NL-South N | 1 | 4 | 1.156796 | ##### |  |
| 32 | 2 NL | 2020-14 | 5 NL-South N | 1 | 5 | #####    | ##### |  |
| 33 | 2 NL | 2020-14 | 5 NL-South N | 2 | 1 | #####    | ##### |  |
| 34 | 2 NL | 2020-14 | 5 NL-South N | 2 | 2 | 1.022727 | ##### |  |
| 35 | 2 NL | 2020-14 | 5 NL-South N | 2 | 3 | #####    | ##### |  |
| 36 | 2 NL | 2020-14 | 5 NL-South N | 2 | 4 | 1.201835 | ##### |  |
| 37 | 2 NL | 2020-14 | 5 NL-South N | 2 | 5 | #####    | ##### |  |
| 38 | 2 NL | 2020-14 | 5 NL-South N | 3 | 1 | #####    | ##### |  |
| 39 | 2 NL | 2020-14 | 5 NL-South N | 3 | 2 | #####    | ##### |  |
| 40 | 2 NL | 2020-14 | 5 NL-South N | 3 | 3 | 1        | ##### |  |
| 41 | 2 NL | 2020-14 | 5 NL-South N | 3 | 4 | 1.102041 | ##### |  |
| 42 | 2 NL | 2020-14 | 5 NL-South N | 3 | 5 | #####    | ##### |  |
| 43 | 2 NL | 2020-14 | 5 NL-West N  | 1 | 1 | #####    | ##### |  |
| 44 | 2 NL | 2020-14 | 5 NL-West N  | 1 | 2 | #####    | ##### |  |
| 45 | 2 NL | 2020-14 | 5 NL-West N  | 1 | 3 | #####    | ##### |  |
| 46 | 2 NL | 2020-14 | 5 NL-West N  | 1 | 4 | #####    | ##### |  |
| 47 | 2 NL | 2020-14 | 5 NL-West N  | 1 | 5 | #####    | ##### |  |
| 48 | 2 NL | 2020-14 | 5 NL-West N  | 2 | 1 | #####    | ##### |  |
| 49 | 2 NL | 2020-14 | 5 NL-West N  | 2 | 2 | #####    | ##### |  |
| 50 | 2 NL | 2020-14 | 5 NL-West N  | 2 | 3 | #####    | ##### |  |
| 51 | 2 NL | 2020-14 | 5 NL-West N  | 2 | 4 | #####    | ##### |  |
| 52 | 2 NL | 2020-14 | 5 NL-West N  | 2 | 5 | #####    | ##### |  |
| 53 | 2 NL | 2020-14 | 5 NL-West N  | 3 | 1 | #####    | ##### |  |
| 54 | 2 NL | 2020-14 | 5 NL-West N  | 3 | 2 | #####    | ##### |  |
| 55 | 2 NL | 2020-14 | 5 NL-West N  | 3 | 3 | #####    | ##### |  |
| 56 | 2 NL | 2020-14 | 5 NL-West N  | 3 | 4 | #####    | ##### |  |
| 57 | 2 NL | 2020-14 | 5 NL-West N  | 3 | 5 | #####    | ##### |  |
| 58 | 2 NL | 2020-14 | 5 NL-West N  | 3 | 5 | #####    | ##### |  |
| 59 | 2 NL | 2020-15 | 1 NL-East Ne | 1 | 1 | 4.957313 | ##### |  |
| 60 | 2 NL | 2020-15 | 1 NL-East Ne | 1 | 2 | 6.72775  | ##### |  |

1  
2  
3  
4  
5  
6  
7  
8  
9  
10  
11  
12  
13  
14  
15  
16  
17  
18  
19  
20  
21  
22  
23  
24  
25  
26  
27  
28  
29  
30  
31  
32  
33  
34  
35  
36  
37  
38  
39  
40  
41  
42  
43  
44  
45  
46  
47  
48  
49  
50  
51  
52  
53  
54  
55  
56  
57  
58  
59  
60

|      |         |              |   |   |          |          |
|------|---------|--------------|---|---|----------|----------|
| 2 NL | 2020-15 | 1 NL-East Ne | 1 | 3 | 5.001736 | #####    |
| 2 NL | 2020-15 | 1 NL-East Ne | 1 | 4 | 5.251567 | #####    |
| 2 NL | 2020-15 | 1 NL-East Ne | 1 | 5 | 2.578776 | #####    |
| 2 NL | 2020-15 | 1 NL-East Ne | 2 | 1 | 4.786899 | #####    |
| 2 NL | 2020-15 | 1 NL-East Ne | 2 | 2 | 5.457143 | 1.017819 |
| 2 NL | 2020-15 | 1 NL-East Ne | 2 | 3 | 5.83871  | #####    |
| 2 NL | 2020-15 | 1 NL-East Ne | 2 | 4 | 4.906667 | #####    |
| 2 NL | 2020-15 | 1 NL-East Ne | 2 | 5 | 2.410256 | #####    |
| 2 NL | 2020-15 | 1 NL-East Ne | 3 | 1 | 5.120583 | #####    |
| 2 NL | 2020-15 | 1 NL-East Ne | 3 | 2 | 7.75     | 1.555341 |
| 2 NL | 2020-15 | 1 NL-East Ne | 3 | 3 | 4.178571 | 1.02913  |
| 2 NL | 2020-15 | 1 NL-East Ne | 3 | 4 | 5.6      | #####    |
| 2 NL | 2020-15 | 1 NL-East Ne | 3 | 5 | 2.75     | #####    |
| 2 NL | 2020-15 | 1 NL-North N | 1 | 1 | 4.148466 | #####    |
| 2 NL | 2020-15 | 1 NL-North N | 1 | 2 | 3.918654 | #####    |
| 2 NL | 2020-15 | 1 NL-North N | 1 | 3 | 4.864986 | #####    |
| 2 NL | 2020-15 | 1 NL-North N | 1 | 4 | 5.101651 | #####    |
| 2 NL | 2020-15 | 1 NL-North N | 1 | 5 | 2.360883 | #####    |
| 2 NL | 2020-15 | 1 NL-North N | 2 | 1 | 3.952434 | #####    |
| 2 NL | 2020-15 | 1 NL-North N | 2 | 2 | 4.733333 | #####    |
| 2 NL | 2020-15 | 1 NL-North N | 2 | 3 | 4.857143 | #####    |
| 2 NL | 2020-15 | 1 NL-North N | 2 | 4 | 3.864407 | #####    |
| 2 NL | 2020-15 | 1 NL-North N | 2 | 5 | 2.242424 | #####    |
| 2 NL | 2020-15 | 1 NL-North N | 3 | 1 | 4.326808 | #####    |
| 2 NL | 2020-15 | 1 NL-North N | 3 | 2 | 3.3      | #####    |
| 2 NL | 2020-15 | 1 NL-North N | 3 | 3 | 4.875    | 1.071347 |
| 2 NL | 2020-15 | 1 NL-North N | 3 | 4 | 6.113636 | #####    |
| 2 NL | 2020-15 | 1 NL-North N | 3 | 5 | 2.457143 | #####    |
| 2 NL | 2020-15 | 1 NL-Overall | 1 | 1 | 4.455509 | #####    |
| 2 NL | 2020-15 | 1 NL-Overall | 1 | 2 | 5.592704 | #####    |
| 2 NL | 2020-15 | 1 NL-Overall | 1 | 3 | 4.788515 | #####    |
| 2 NL | 2020-15 | 1 NL-Overall | 1 | 4 | 4.997228 | #####    |
| 2 NL | 2020-15 | 1 NL-Overall | 1 | 5 | 2.344629 | #####    |
| 2 NL | 2020-15 | 1 NL-Overall | 2 | 1 | 4.523879 | #####    |
| 2 NL | 2020-15 | 1 NL-Overall | 2 | 2 | 5.796294 | #####    |
| 2 NL | 2020-15 | 1 NL-Overall | 2 | 3 | 5.155683 | #####    |
| 2 NL | 2020-15 | 1 NL-Overall | 2 | 4 | 4.812369 | #####    |
| 2 NL | 2020-15 | 1 NL-Overall | 2 | 5 | 2.216249 | #####    |
| 2 NL | 2020-15 | 1 NL-Overall | 3 | 1 | 4.373794 | #####    |
| 2 NL | 2020-15 | 1 NL-Overall | 3 | 2 | 5.392491 | #####    |
| 2 NL | 2020-15 | 1 NL-Overall | 3 | 3 | 4.277359 | #####    |
| 2 NL | 2020-15 | 1 NL-Overall | 3 | 4 | 5.214737 | #####    |
| 2 NL | 2020-15 | 1 NL-Overall | 3 | 5 | 2.493043 | #####    |
| 2 NL | 2020-15 | 1 NL-South N | 1 | 1 | 4.344815 | #####    |
| 2 NL | 2020-15 | 1 NL-South N | 1 | 2 | 5.681519 | 1.089614 |
| 2 NL | 2020-15 | 1 NL-South N | 1 | 3 | 4.174199 | #####    |
| 2 NL | 2020-15 | 1 NL-South N | 1 | 4 | 5.042596 | #####    |
| 2 NL | 2020-15 | 1 NL-South N | 1 | 5 | 2.923963 | #####    |
| 2 NL | 2020-15 | 1 NL-South N | 2 | 1 | 4.468411 | #####    |
| 2 NL | 2020-15 | 1 NL-South N | 2 | 2 | 6.208333 | 1.329582 |
| 2 NL | 2020-15 | 1 NL-South N | 2 | 3 | 4.824324 | #####    |
| 2 NL | 2020-15 | 1 NL-South N | 2 | 4 | 4.824324 | #####    |
| 2 NL | 2020-15 | 1 NL-South N | 2 | 5 | 2.862069 | #####    |
| 2 NL | 2020-15 | 1 NL-South N | 3 | 1 | 4.221334 | #####    |
| 2 NL | 2020-15 | 1 NL-South N | 3 | 2 | 5.25     | 1.646725 |
| 2 NL | 2020-15 | 1 NL-South N | 3 | 3 | 3.416667 | #####    |

|    |      |         |              |   |   |          |          |  |
|----|------|---------|--------------|---|---|----------|----------|--|
| 1  |      |         |              |   |   |          |          |  |
| 2  |      |         |              |   |   |          |          |  |
| 3  | 2 NL | 2020-15 | 1 NL-South N | 3 | 4 | 5.215686 | #####    |  |
| 4  | 2 NL | 2020-15 | 1 NL-South N | 3 | 5 | 3        | #####    |  |
| 5  | 2 NL | 2020-15 | 1 NL-West N  | 1 | 1 | 4.349363 | #####    |  |
| 6  | 2 NL | 2020-15 | 1 NL-West N  | 1 | 2 | 5.363476 | #####    |  |
| 7  | 2 NL | 2020-15 | 1 NL-West N  | 1 | 3 | 4.949125 | #####    |  |
| 8  | 2 NL | 2020-15 | 1 NL-West N  | 1 | 4 | 4.823568 | #####    |  |
| 9  | 2 NL | 2020-15 | 1 NL-West N  | 1 | 5 | 1.920983 | #####    |  |
| 10 | 2 NL | 2020-15 | 1 NL-West N  | 2 | 1 | 4.551583 | #####    |  |
| 11 | 2 NL | 2020-15 | 1 NL-West N  | 2 | 2 | 6        | #####    |  |
| 12 | 2 NL | 2020-15 | 1 NL-West N  | 2 | 3 | 5.108108 | #####    |  |
| 13 | 2 NL | 2020-15 | 1 NL-West N  | 2 | 4 | 4.936364 | #####    |  |
| 14 | 2 NL | 2020-15 | 1 NL-West N  | 2 | 5 | 1.788732 | #####    |  |
| 15 | 2 NL | 2020-15 | 1 NL-West N  | 3 | 1 | 4.038441 | #####    |  |
| 16 | 2 NL | 2020-15 | 1 NL-West N  | 3 | 2 | 4.571429 | 1.44198  |  |
| 17 | 2 NL | 2020-15 | 1 NL-West N  | 3 | 3 | 4.666667 | 1.352662 |  |
| 18 | 2 NL | 2020-15 | 1 NL-West N  | 3 | 4 | 4.631579 | #####    |  |
| 19 | 2 NL | 2020-15 | 1 NL-West N  | 3 | 5 | 2.092593 | #####    |  |
| 20 | 2 NL | 2020-15 | 2 NL-East Ne | 1 | 1 | 1.676676 | #####    |  |
| 21 | 2 NL | 2020-15 | 2 NL-East Ne | 1 | 2 | 1.995437 | #####    |  |
| 22 | 2 NL | 2020-15 | 2 NL-East Ne | 1 | 3 | 1.691903 | #####    |  |
| 23 | 2 NL | 2020-15 | 2 NL-East Ne | 1 | 4 | 1.668309 | #####    |  |
| 24 | 2 NL | 2020-15 | 2 NL-East Ne | 1 | 5 | 1.344512 | #####    |  |
| 25 | 2 NL | 2020-15 | 2 NL-East Ne | 2 | 1 | 1.760288 | #####    |  |
| 26 | 2 NL | 2020-15 | 2 NL-East Ne | 2 | 2 | 1.885714 | #####    |  |
| 27 | 2 NL | 2020-15 | 2 NL-East Ne | 2 | 3 | 2.106061 | #####    |  |
| 28 | 2 NL | 2020-15 | 2 NL-East Ne | 2 | 4 | 1.613636 | #####    |  |
| 29 | 2 NL | 2020-15 | 2 NL-East Ne | 2 | 5 | 1.409091 | #####    |  |
| 30 | 2 NL | 2020-15 | 2 NL-East Ne | 3 | 1 | 1.597022 | #####    |  |
| 31 | 2 NL | 2020-15 | 2 NL-East Ne | 3 | 2 | 2.076923 | #####    |  |
| 32 | 2 NL | 2020-15 | 2 NL-East Ne | 3 | 3 | 1.3125   | #####    |  |
| 33 | 2 NL | 2020-15 | 2 NL-East Ne | 3 | 4 | 1.72549  | #####    |  |
| 34 | 2 NL | 2020-15 | 2 NL-East Ne | 3 | 5 | 1.272727 | #####    |  |
| 35 | 2 NL | 2020-15 | 2 NL-North N | 1 | 1 | 1.541304 | #####    |  |
| 36 | 2 NL | 2020-15 | 2 NL-North N | 1 | 2 | 1.475787 | #####    |  |
| 37 | 2 NL | 2020-15 | 2 NL-North N | 1 | 3 | 1.553238 | #####    |  |
| 38 | 2 NL | 2020-15 | 2 NL-North N | 1 | 4 | 1.757563 | #####    |  |
| 39 | 2 NL | 2020-15 | 2 NL-North N | 1 | 5 | 1.295892 | #####    |  |
| 40 | 2 NL | 2020-15 | 2 NL-North N | 2 | 1 | 1.643823 | #####    |  |
| 41 | 2 NL | 2020-15 | 2 NL-North N | 2 | 2 | 1.875    | #####    |  |
| 42 | 2 NL | 2020-15 | 2 NL-North N | 2 | 3 | 1.765625 | #####    |  |
| 43 | 2 NL | 2020-15 | 2 NL-North N | 2 | 4 | 1.636364 | #####    |  |
| 44 | 2 NL | 2020-15 | 2 NL-North N | 2 | 5 | 1.294118 | #####    |  |
| 45 | 2 NL | 2020-15 | 2 NL-North N | 3 | 1 | 1.448165 | #####    |  |
| 46 | 2 NL | 2020-15 | 2 NL-North N | 3 | 2 | 1.181818 | #####    |  |
| 47 | 2 NL | 2020-15 | 2 NL-North N | 3 | 3 | 1.277778 | #####    |  |
| 48 | 2 NL | 2020-15 | 2 NL-North N | 3 | 4 | 1.857143 | #####    |  |
| 49 | 2 NL | 2020-15 | 2 NL-North N | 3 | 5 | 1.297297 | #####    |  |
| 50 | 2 NL | 2020-15 | 2 NL-Overall | 1 | 1 | 1.584903 | #####    |  |
| 51 | 2 NL | 2020-15 | 2 NL-Overall | 1 | 2 | 1.98879  | #####    |  |
| 52 | 2 NL | 2020-15 | 2 NL-Overall | 1 | 3 | 1.710827 | #####    |  |
| 53 | 2 NL | 2020-15 | 2 NL-Overall | 1 | 4 | 1.506004 | #####    |  |
| 54 | 2 NL | 2020-15 | 2 NL-Overall | 1 | 5 | 1.160716 | #####    |  |
| 55 | 2 NL | 2020-15 | 2 NL-Overall | 2 | 1 | 1.641358 | #####    |  |
| 56 | 2 NL | 2020-15 | 2 NL-Overall | 2 | 2 | 2.044707 | #####    |  |
| 57 | 2 NL | 2020-15 | 2 NL-Overall | 2 | 3 | 1.915166 | #####    |  |
| 58 | 2 NL | 2020-15 | 2 NL-Overall | 2 | 4 | 1.477885 | #####    |  |
| 59 | 2 NL | 2020-15 | 2 NL-Overall | 2 |   |          |          |  |
| 60 | 2 NL | 2020-15 | 2 NL-Overall | 2 |   |          |          |  |

|    |      |         |              |   |   |          |       |  |  |
|----|------|---------|--------------|---|---|----------|-------|--|--|
| 1  |      |         |              |   |   |          |       |  |  |
| 2  |      |         |              |   |   |          |       |  |  |
| 3  | 2 NL | 2020-15 | 2 NL-Overall | 2 | 5 | 1.109968 | ##### |  |  |
| 4  | 2 NL | 2020-15 | 2 NL-Overall | 3 | 1 | 1.517591 | ##### |  |  |
| 5  | 2 NL | 2020-15 | 2 NL-Overall | 3 | 2 | 1.932536 | ##### |  |  |
| 6  | 2 NL | 2020-15 | 2 NL-Overall | 3 | 3 | 1.439283 | ##### |  |  |
| 7  | 2 NL | 2020-15 | 2 NL-Overall | 3 | 4 | 1.539714 | ##### |  |  |
| 8  | 2 NL | 2020-15 | 2 NL-Overall | 3 | 5 | 1.219498 | ##### |  |  |
| 9  | 2 NL | 2020-15 | 2 NL-South N | 1 | 1 | 1.69157  | ##### |  |  |
| 10 | 2 NL | 2020-15 | 2 NL-South N | 1 | 2 | 2.351098 | ##### |  |  |
| 11 | 2 NL | 2020-15 | 2 NL-South N | 1 | 3 | 1.830781 | ##### |  |  |
| 12 | 2 NL | 2020-15 | 2 NL-South N | 1 | 4 | 1.489937 | ##### |  |  |
| 13 | 2 NL | 2020-15 | 2 NL-South N | 1 | 5 | 1.322776 | ##### |  |  |
| 14 | 2 NL | 2020-15 | 2 NL-South N | 2 | 1 | 1.764341 | ##### |  |  |
| 15 | 2 NL | 2020-15 | 2 NL-South N | 2 | 2 | 2.423077 | ##### |  |  |
| 16 | 2 NL | 2020-15 | 2 NL-South N | 2 | 3 | 2.160494 | ##### |  |  |
| 17 | 2 NL | 2020-15 | 2 NL-South N | 2 | 4 | 1.488372 | ##### |  |  |
| 18 | 2 NL | 2020-15 | 2 NL-South N | 2 | 5 | 1.220339 | ##### |  |  |
| 19 | 2 NL | 2020-15 | 2 NL-South N | 3 | 1 | 1.623007 | ##### |  |  |
| 20 | 2 NL | 2020-15 | 2 NL-South N | 3 | 2 | 2.3      | ##### |  |  |
| 21 | 2 NL | 2020-15 | 2 NL-South N | 3 | 3 | 1.482759 | ##### |  |  |
| 22 | 2 NL | 2020-15 | 2 NL-South N | 3 | 4 | 1.491228 | ##### |  |  |
| 23 | 2 NL | 2020-15 | 2 NL-South N | 3 | 5 | 1.44186  | ##### |  |  |
| 24 | 2 NL | 2020-15 | 2 NL-South N | 3 | 5 | 1.44186  | ##### |  |  |
| 25 | 2 NL | 2020-15 | 2 NL-West N  | 1 | 1 | 1.503225 | ##### |  |  |
| 26 | 2 NL | 2020-15 | 2 NL-West N  | 1 | 2 | 1.952616 | ##### |  |  |
| 27 | 2 NL | 2020-15 | 2 NL-West N  | 1 | 3 | 1.69684  | ##### |  |  |
| 28 | 2 NL | 2020-15 | 2 NL-West N  | 1 | 4 | 1.369336 | ##### |  |  |
| 29 | 2 NL | 2020-15 | 2 NL-West N  | 1 | 5 | #####    | ##### |  |  |
| 30 | 2 NL | 2020-15 | 2 NL-West N  | 2 | 1 | 1.552336 | ##### |  |  |
| 31 | 2 NL | 2020-15 | 2 NL-West N  | 2 | 2 | 2.018182 | ##### |  |  |
| 32 | 2 NL | 2020-15 | 2 NL-West N  | 2 | 3 | 1.8      | ##### |  |  |
| 33 | 2 NL | 2020-15 | 2 NL-West N  | 2 | 4 | 1.390244 | ##### |  |  |
| 34 | 2 NL | 2020-15 | 2 NL-West N  | 2 | 5 | #####    | ##### |  |  |
| 35 | 2 NL | 2020-15 | 2 NL-West N  | 3 | 1 | 1.425734 | ##### |  |  |
| 36 | 2 NL | 2020-15 | 2 NL-West N  | 3 | 2 | 1.857143 | ##### |  |  |
| 37 | 2 NL | 2020-15 | 2 NL-West N  | 3 | 3 | 1.52     | ##### |  |  |
| 38 | 2 NL | 2020-15 | 2 NL-West N  | 3 | 4 | 1.333333 | ##### |  |  |
| 39 | 2 NL | 2020-15 | 2 NL-West N  | 3 | 5 | 1.035714 | ##### |  |  |
| 40 | 2 NL | 2020-15 | 3 NL-East Ne | 1 | 1 | 0        | 0     |  |  |
| 41 | 2 NL | 2020-15 | 3 NL-East Ne | 1 | 2 | 0        | 0     |  |  |
| 42 | 2 NL | 2020-15 | 3 NL-East Ne | 1 | 3 | 0        | 0     |  |  |
| 43 | 2 NL | 2020-15 | 3 NL-East Ne | 1 | 4 | 0        | 0     |  |  |
| 44 | 2 NL | 2020-15 | 3 NL-East Ne | 1 | 5 | 0        | 0     |  |  |
| 45 | 2 NL | 2020-15 | 3 NL-East Ne | 2 | 1 | 0        | 0     |  |  |
| 46 | 2 NL | 2020-15 | 3 NL-East Ne | 2 | 2 | 0        | 0     |  |  |
| 47 | 2 NL | 2020-15 | 3 NL-East Ne | 2 | 3 | 0        | 0     |  |  |
| 48 | 2 NL | 2020-15 | 3 NL-East Ne | 2 | 4 | 0        | 0     |  |  |
| 49 | 2 NL | 2020-15 | 3 NL-East Ne | 2 | 5 | 0        | 0     |  |  |
| 50 | 2 NL | 2020-15 | 3 NL-East Ne | 3 | 1 | 0        | 0     |  |  |
| 51 | 2 NL | 2020-15 | 3 NL-East Ne | 3 | 2 | 0        | 0     |  |  |
| 52 | 2 NL | 2020-15 | 3 NL-East Ne | 3 | 3 | 0        | 0     |  |  |
| 53 | 2 NL | 2020-15 | 3 NL-East Ne | 3 | 4 | 0        | 0     |  |  |
| 54 | 2 NL | 2020-15 | 3 NL-East Ne | 3 | 5 | 0        | 0     |  |  |
| 55 | 2 NL | 2020-15 | 3 NL-North N | 1 | 1 | 0        | 0     |  |  |
| 56 | 2 NL | 2020-15 | 3 NL-North N | 1 | 2 | 0        | 0     |  |  |
| 57 | 2 NL | 2020-15 | 3 NL-North N | 1 | 3 | 0        | 0     |  |  |
| 58 | 2 NL | 2020-15 | 3 NL-North N | 1 | 4 | 0        | 0     |  |  |
| 59 | 2 NL | 2020-15 | 3 NL-North N | 1 | 4 | 0        | 0     |  |  |
| 60 | 2 NL | 2020-15 | 3 NL-North N | 1 | 5 | 0        | 0     |  |  |



|    |      |         |              |   |   |          |       |
|----|------|---------|--------------|---|---|----------|-------|
| 1  |      |         |              |   |   |          |       |
| 2  |      |         |              |   |   |          |       |
| 3  | 2 NL | 2020-15 | 3 NL-North N | 2 | 1 | 0        | 0     |
| 4  | 2 NL | 2020-15 | 3 NL-North N | 2 | 2 | 0        | 0     |
| 5  | 2 NL | 2020-15 | 3 NL-North N | 2 | 3 | 0        | 0     |
| 6  | 2 NL | 2020-15 | 3 NL-North N | 2 | 4 | 0        | 0     |
| 7  | 2 NL | 2020-15 | 3 NL-North N | 2 | 5 | 0        | 0     |
| 8  | 2 NL | 2020-15 | 3 NL-North N | 3 | 1 | 0        | 0     |
| 9  | 2 NL | 2020-15 | 3 NL-North N | 3 | 2 | 0        | 0     |
| 10 | 2 NL | 2020-15 | 3 NL-North N | 3 | 3 | 0        | 0     |
| 11 | 2 NL | 2020-15 | 3 NL-North N | 3 | 4 | 0        | 0     |
| 12 | 2 NL | 2020-15 | 3 NL-North N | 3 | 5 | 0        | 0     |
| 13 | 2 NL | 2020-15 | 3 NL-Overall | 1 | 1 | 0        | 0     |
| 14 | 2 NL | 2020-15 | 3 NL-Overall | 1 | 2 | 0        | 0     |
| 15 | 2 NL | 2020-15 | 3 NL-Overall | 1 | 3 | 0        | 0     |
| 16 | 2 NL | 2020-15 | 3 NL-Overall | 1 | 4 | 0        | 0     |
| 17 | 2 NL | 2020-15 | 3 NL-Overall | 1 | 5 | 0        | 0     |
| 18 | 2 NL | 2020-15 | 3 NL-Overall | 2 | 1 | 0        | 0     |
| 19 | 2 NL | 2020-15 | 3 NL-Overall | 2 | 2 | 0        | 0     |
| 20 | 2 NL | 2020-15 | 3 NL-Overall | 2 | 3 | 0        | 0     |
| 21 | 2 NL | 2020-15 | 3 NL-Overall | 2 | 4 | 0        | 0     |
| 22 | 2 NL | 2020-15 | 3 NL-Overall | 2 | 5 | 0        | 0     |
| 23 | 2 NL | 2020-15 | 3 NL-Overall | 3 | 1 | 0        | 0     |
| 24 | 2 NL | 2020-15 | 3 NL-Overall | 3 | 2 | 0        | 0     |
| 25 | 2 NL | 2020-15 | 3 NL-Overall | 3 | 3 | 0        | 0     |
| 26 | 2 NL | 2020-15 | 3 NL-Overall | 3 | 4 | 0        | 0     |
| 27 | 2 NL | 2020-15 | 3 NL-Overall | 3 | 5 | 0        | 0     |
| 28 | 2 NL | 2020-15 | 3 NL-South N | 1 | 1 | 0        | 0     |
| 29 | 2 NL | 2020-15 | 3 NL-South N | 1 | 2 | 0        | 0     |
| 30 | 2 NL | 2020-15 | 3 NL-South N | 1 | 3 | 0        | 0     |
| 31 | 2 NL | 2020-15 | 3 NL-South N | 1 | 4 | 0        | 0     |
| 32 | 2 NL | 2020-15 | 3 NL-South N | 1 | 5 | 0        | 0     |
| 33 | 2 NL | 2020-15 | 3 NL-South N | 2 | 1 | 0        | 0     |
| 34 | 2 NL | 2020-15 | 3 NL-South N | 2 | 2 | 0        | 0     |
| 35 | 2 NL | 2020-15 | 3 NL-South N | 2 | 3 | 0        | 0     |
| 36 | 2 NL | 2020-15 | 3 NL-South N | 2 | 4 | 0        | 0     |
| 37 | 2 NL | 2020-15 | 3 NL-South N | 2 | 5 | 0        | 0     |
| 38 | 2 NL | 2020-15 | 3 NL-South N | 3 | 1 | 0        | 0     |
| 39 | 2 NL | 2020-15 | 3 NL-South N | 3 | 2 | 0        | 0     |
| 40 | 2 NL | 2020-15 | 3 NL-South N | 3 | 3 | 0        | 0     |
| 41 | 2 NL | 2020-15 | 3 NL-South N | 3 | 4 | 0        | 0     |
| 42 | 2 NL | 2020-15 | 3 NL-South N | 3 | 5 | 0        | 0     |
| 43 | 2 NL | 2020-15 | 3 NL-West N  | 1 | 1 | 0        | 0     |
| 44 | 2 NL | 2020-15 | 3 NL-West N  | 1 | 2 | 0        | 0     |
| 45 | 2 NL | 2020-15 | 3 NL-West N  | 1 | 3 | 0        | 0     |
| 46 | 2 NL | 2020-15 | 3 NL-West N  | 1 | 4 | 0        | 0     |
| 47 | 2 NL | 2020-15 | 3 NL-West N  | 1 | 5 | 0        | 0     |
| 48 | 2 NL | 2020-15 | 3 NL-West N  | 2 | 1 | 0        | 0     |
| 49 | 2 NL | 2020-15 | 3 NL-West N  | 2 | 2 | 0        | 0     |
| 50 | 2 NL | 2020-15 | 3 NL-West N  | 2 | 3 | 0        | 0     |
| 51 | 2 NL | 2020-15 | 3 NL-West N  | 2 | 4 | 0        | 0     |
| 52 | 2 NL | 2020-15 | 3 NL-West N  | 2 | 5 | 0        | 0     |
| 53 | 2 NL | 2020-15 | 3 NL-West N  | 3 | 1 | 0        | 0     |
| 54 | 2 NL | 2020-15 | 3 NL-West N  | 3 | 2 | 0        | 0     |
| 55 | 2 NL | 2020-15 | 3 NL-West N  | 3 | 3 | 0        | 0     |
| 56 | 2 NL | 2020-15 | 3 NL-West N  | 3 | 4 | 0        | 0     |
| 57 | 2 NL | 2020-15 | 3 NL-West N  | 3 | 5 | 0        | 0     |
| 58 | 2 NL | 2020-15 | 4 NL-East Ne | 1 | 1 | 2.307279 | ##### |

|    |      |         |              |   |   |          |          |  |
|----|------|---------|--------------|---|---|----------|----------|--|
| 1  |      |         |              |   |   |          |          |  |
| 2  |      |         |              |   |   |          |          |  |
| 3  | 2 NL | 2020-15 | 4 NL-East Ne | 1 | 2 | 3.076847 | #####    |  |
| 4  | 2 NL | 2020-15 | 4 NL-East Ne | 1 | 3 | 2.668897 | #####    |  |
| 5  | 2 NL | 2020-15 | 4 NL-East Ne | 1 | 4 | 2.618613 | #####    |  |
| 6  | 2 NL | 2020-15 | 4 NL-East Ne | 1 | 5 | #####    | #####    |  |
| 7  | 2 NL | 2020-15 | 4 NL-East Ne | 2 | 1 | 2.08571  | #####    |  |
| 8  | 2 NL | 2020-15 | 4 NL-East Ne | 2 | 2 | 2.275    | #####    |  |
| 9  | 2 NL | 2020-15 | 4 NL-East Ne | 2 | 3 | 2.928571 | #####    |  |
| 10 | 2 NL | 2020-15 | 4 NL-East Ne | 2 | 4 | 2.443182 | #####    |  |
| 11 | 2 NL | 2020-15 | 4 NL-East Ne | 2 | 5 | #####    | #####    |  |
| 12 | 2 NL | 2020-15 | 4 NL-East Ne | 3 | 1 | 2.512267 | #####    |  |
| 13 | 2 NL | 2020-15 | 4 NL-East Ne | 3 | 2 | 3.666667 | 1.235458 |  |
| 14 | 2 NL | 2020-15 | 4 NL-East Ne | 3 | 3 | 2.424242 | #####    |  |
| 15 | 2 NL | 2020-15 | 4 NL-East Ne | 3 | 4 | 2.785714 | #####    |  |
| 16 | 2 NL | 2020-15 | 4 NL-East Ne | 3 | 5 | #####    | #####    |  |
| 17 | 2 NL | 2020-15 | 4 NL-North N | 1 | 1 | 1.989505 | #####    |  |
| 18 | 2 NL | 2020-15 | 4 NL-North N | 1 | 2 | 2.666482 | #####    |  |
| 19 | 2 NL | 2020-15 | 4 NL-North N | 1 | 3 | 2.373653 | #####    |  |
| 20 | 2 NL | 2020-15 | 4 NL-North N | 1 | 4 | 2.647075 | #####    |  |
| 21 | 2 NL | 2020-15 | 4 NL-North N | 1 | 5 | #####    | #####    |  |
| 22 | 2 NL | 2020-15 | 4 NL-North N | 2 | 1 | 1.753345 | #####    |  |
| 23 | 2 NL | 2020-15 | 4 NL-North N | 2 | 2 | 2.631579 | 1.008021 |  |
| 24 | 2 NL | 2020-15 | 4 NL-North N | 2 | 3 | 2.38806  | #####    |  |
| 25 | 2 NL | 2020-15 | 4 NL-North N | 2 | 4 | 1.757143 | #####    |  |
| 26 | 2 NL | 2020-15 | 4 NL-North N | 2 | 5 | 0        | 0        |  |
| 27 | 2 NL | 2020-15 | 4 NL-North N | 3 | 1 | 2.211002 | #####    |  |
| 28 | 2 NL | 2020-15 | 4 NL-North N | 3 | 2 | 2.692308 | 1.505173 |  |
| 29 | 2 NL | 2020-15 | 4 NL-North N | 3 | 3 | 2.352941 | #####    |  |
| 30 | 2 NL | 2020-15 | 4 NL-North N | 3 | 4 | 3.392157 | #####    |  |
| 31 | 2 NL | 2020-15 | 4 NL-North N | 3 | 5 | #####    | #####    |  |
| 32 | 2 NL | 2020-15 | 4 NL-North N | 3 | 5 | #####    | #####    |  |
| 33 | 2 NL | 2020-15 | 4 NL-Overall | 1 | 1 | 2.063426 | #####    |  |
| 34 | 2 NL | 2020-15 | 4 NL-Overall | 1 | 2 | 2.473652 | #####    |  |
| 35 | 2 NL | 2020-15 | 4 NL-Overall | 1 | 3 | 2.455428 | #####    |  |
| 36 | 2 NL | 2020-15 | 4 NL-Overall | 1 | 4 | 2.689863 | #####    |  |
| 37 | 2 NL | 2020-15 | 4 NL-Overall | 1 | 5 | #####    | #####    |  |
| 38 | 2 NL | 2020-15 | 4 NL-Overall | 2 | 1 | 1.95901  | #####    |  |
| 39 | 2 NL | 2020-15 | 4 NL-Overall | 2 | 2 | 2.542521 | #####    |  |
| 40 | 2 NL | 2020-15 | 4 NL-Overall | 2 | 3 | 2.219619 | #####    |  |
| 41 | 2 NL | 2020-15 | 4 NL-Overall | 2 | 4 | 2.543083 | #####    |  |
| 42 | 2 NL | 2020-15 | 4 NL-Overall | 2 | 5 | #####    | #####    |  |
| 43 | 2 NL | 2020-15 | 4 NL-Overall | 3 | 1 | 2.18637  | #####    |  |
| 44 | 2 NL | 2020-15 | 4 NL-Overall | 3 | 2 | 2.405019 | #####    |  |
| 45 | 2 NL | 2020-15 | 4 NL-Overall | 3 | 3 | 2.760095 | #####    |  |
| 46 | 2 NL | 2020-15 | 4 NL-Overall | 3 | 4 | 2.864616 | #####    |  |
| 47 | 2 NL | 2020-15 | 4 NL-Overall | 3 | 5 | #####    | #####    |  |
| 48 | 2 NL | 2020-15 | 4 NL-South N | 1 | 1 | 2.018753 | #####    |  |
| 49 | 2 NL | 2020-15 | 4 NL-South N | 1 | 2 | 2.42539  | #####    |  |
| 50 | 2 NL | 2020-15 | 4 NL-South N | 1 | 3 | 2.279715 | #####    |  |
| 51 | 2 NL | 2020-15 | 4 NL-South N | 1 | 4 | 2.73184  | #####    |  |
| 52 | 2 NL | 2020-15 | 4 NL-South N | 1 | 5 | #####    | #####    |  |
| 53 | 2 NL | 2020-15 | 4 NL-South N | 2 | 1 | 1.870957 | #####    |  |
| 54 | 2 NL | 2020-15 | 4 NL-South N | 2 | 2 | 2.741935 | 1.087368 |  |
| 55 | 2 NL | 2020-15 | 4 NL-South N | 2 | 3 | 1.735632 | #####    |  |
| 56 | 2 NL | 2020-15 | 4 NL-South N | 2 | 4 | 2.658537 | #####    |  |
| 57 | 2 NL | 2020-15 | 4 NL-South N | 2 | 5 | #####    | #####    |  |
| 58 | 2 NL | 2020-15 | 4 NL-South N | 3 | 1 | 2.161143 | #####    |  |
| 59 | 2 NL | 2020-15 | 4 NL-South N | 3 | 2 | 2.181818 | 1.163077 |  |
| 60 | 2 NL | 2020-15 | 4 NL-South N | 3 | 2 | 2.181818 | 1.163077 |  |

|    |      |         |              |   |   |          |          |
|----|------|---------|--------------|---|---|----------|----------|
| 1  |      |         |              |   |   |          |          |
| 2  |      |         |              |   |   |          |          |
| 3  | 2 NL | 2020-15 | 4 NL-South N | 3 | 3 | 2.896552 | 1.145223 |
| 4  | 2 NL | 2020-15 | 4 NL-South N | 3 | 4 | 2.789474 | #####    |
| 5  | 2 NL | 2020-15 | 4 NL-South N | 3 | 5 | #####    | #####    |
| 6  | 2 NL | 2020-15 | 4 NL-West N  | 1 | 1 | 1.988443 | #####    |
| 7  | 2 NL | 2020-15 | 4 NL-West N  | 1 | 2 | 2.101502 | #####    |
| 8  | 2 NL | 2020-15 | 4 NL-West N  | 1 | 3 | 2.460506 | #####    |
| 9  | 2 NL | 2020-15 | 4 NL-West N  | 1 | 4 | 2.718661 | #####    |
| 10 | 2 NL | 2020-15 | 4 NL-West N  | 1 | 5 | 0        | 0        |
| 11 | 2 NL | 2020-15 | 4 NL-West N  | 2 | 1 | 1.984237 | #####    |
| 12 | 2 NL | 2020-15 | 4 NL-West N  | 2 | 2 | 2.563636 | #####    |
| 13 | 2 NL | 2020-15 | 4 NL-West N  | 2 | 3 | 2.149425 | #####    |
| 14 | 2 NL | 2020-15 | 4 NL-West N  | 2 | 4 | 2.688    | #####    |
| 15 | 2 NL | 2020-15 | 4 NL-West N  | 2 | 5 | 0        | 0        |
| 16 | 2 NL | 2020-15 | 4 NL-West N  | 3 | 1 | 1.994901 | #####    |
| 17 | 2 NL | 2020-15 | 4 NL-West N  | 3 | 2 | 1.428571 | 1.376801 |
| 18 | 2 NL | 2020-15 | 4 NL-West N  | 3 | 3 | 2.931034 | #####    |
| 19 | 2 NL | 2020-15 | 4 NL-West N  | 3 | 4 | 2.775    | #####    |
| 20 | 2 NL | 2020-15 | 4 NL-West N  | 3 | 5 | 0        | 0        |
| 21 | 2 NL | 2020-15 | 4 NL-West N  | 3 | 5 | 0        | 0        |
| 22 | 2 NL | 2020-15 | 5 NL-East Ne | 1 | 1 | 1.099826 | #####    |
| 23 | 2 NL | 2020-15 | 5 NL-East Ne | 1 | 2 | 1.04324  | #####    |
| 24 | 2 NL | 2020-15 | 5 NL-East Ne | 1 | 3 | 1.171073 | #####    |
| 25 | 2 NL | 2020-15 | 5 NL-East Ne | 1 | 4 | 1.138796 | #####    |
| 26 | 2 NL | 2020-15 | 5 NL-East Ne | 1 | 5 | #####    | #####    |
| 27 | 2 NL | 2020-15 | 5 NL-East Ne | 2 | 1 | 1.122773 | #####    |
| 28 | 2 NL | 2020-15 | 5 NL-East Ne | 2 | 2 | 1.365854 | #####    |
| 29 | 2 NL | 2020-15 | 5 NL-East Ne | 2 | 3 | 1.028986 | #####    |
| 30 | 2 NL | 2020-15 | 5 NL-East Ne | 2 | 4 | 1.120482 | #####    |
| 31 | 2 NL | 2020-15 | 5 NL-East Ne | 2 | 5 | 1.02439  | #####    |
| 32 | 2 NL | 2020-15 | 5 NL-East Ne | 3 | 1 | 1.078563 | #####    |
| 33 | 2 NL | 2020-15 | 5 NL-East Ne | 3 | 2 | 0.8      | #####    |
| 34 | 2 NL | 2020-15 | 5 NL-East Ne | 3 | 3 | 1.30303  | #####    |
| 35 | 2 NL | 2020-15 | 5 NL-East Ne | 3 | 4 | 1.156863 | #####    |
| 36 | 2 NL | 2020-15 | 5 NL-East Ne | 3 | 5 | 0.9375   | #####    |
| 37 | 2 NL | 2020-15 | 5 NL-North N | 1 | 1 | 1.307112 | #####    |
| 38 | 2 NL | 2020-15 | 5 NL-North N | 1 | 2 | 1.562818 | #####    |
| 39 | 2 NL | 2020-15 | 5 NL-North N | 1 | 3 | 1.286051 | #####    |
| 40 | 2 NL | 2020-15 | 5 NL-North N | 1 | 4 | 1.334437 | #####    |
| 41 | 2 NL | 2020-15 | 5 NL-North N | 1 | 5 | 1.073481 | #####    |
| 42 | 2 NL | 2020-15 | 5 NL-North N | 2 | 1 | 1.020683 | #####    |
| 43 | 2 NL | 2020-15 | 5 NL-North N | 2 | 2 | 1.216216 | #####    |
| 44 | 2 NL | 2020-15 | 5 NL-North N | 2 | 3 | 0.9375   | #####    |
| 45 | 2 NL | 2020-15 | 5 NL-North N | 2 | 4 | #####    | #####    |
| 46 | 2 NL | 2020-15 | 5 NL-North N | 2 | 5 | 1.028571 | #####    |
| 47 | 2 NL | 2020-15 | 5 NL-North N | 3 | 1 | 1.575375 | #####    |
| 48 | 2 NL | 2020-15 | 5 NL-North N | 3 | 2 | 1.833333 | #####    |
| 49 | 2 NL | 2020-15 | 5 NL-North N | 3 | 3 | 1.764706 | #####    |
| 50 | 2 NL | 2020-15 | 5 NL-North N | 3 | 4 | 1.62     | #####    |
| 51 | 2 NL | 2020-15 | 5 NL-North N | 3 | 5 | 1.111111 | #####    |
| 52 | 2 NL | 2020-15 | 5 NL-Overall | 1 | 1 | 1.102657 | #####    |
| 53 | 2 NL | 2020-15 | 5 NL-Overall | 1 | 2 | 1.215927 | #####    |
| 54 | 2 NL | 2020-15 | 5 NL-Overall | 1 | 3 | 1.067092 | #####    |
| 55 | 2 NL | 2020-15 | 5 NL-Overall | 1 | 4 | 1.1197   | #####    |
| 56 | 2 NL | 2020-15 | 5 NL-Overall | 1 | 5 | 1.027264 | #####    |
| 57 | 2 NL | 2020-15 | 5 NL-Overall | 2 | 1 | 1.050956 | #####    |
| 58 | 2 NL | 2020-15 | 5 NL-Overall | 2 | 2 | 1.09273  | #####    |
| 59 | 2 NL | 2020-15 | 5 NL-Overall | 2 | 3 | 1.136967 | #####    |
| 60 | 2 NL | 2020-15 | 5 NL-Overall | 2 | 3 | 1.136967 | #####    |

1  
2  
3  
4  
5  
6  
7  
8  
9  
10  
11  
12  
13  
14  
15  
16  
17  
18  
19  
20  
21  
22  
23  
24  
25  
26  
27  
28  
29  
30  
31  
32  
33  
34  
35  
36  
37  
38  
39  
40  
41  
42  
43  
44  
45  
46  
47  
48  
49  
50  
51  
52  
53  
54  
55  
56  
57  
58  
59  
60

|      |         |              |   |   |          |          |
|------|---------|--------------|---|---|----------|----------|
| 2 NL | 2020-15 | 5 NL-Overall | 2 | 4 | #####    | #####    |
| 2 NL | 2020-15 | 5 NL-Overall | 2 | 5 | #####    | #####    |
| 2 NL | 2020-15 | 5 NL-Overall | 3 | 1 | 1.16407  | #####    |
| 2 NL | 2020-15 | 5 NL-Overall | 3 | 2 | 1.334352 | #####    |
| 2 NL | 2020-15 | 5 NL-Overall | 3 | 3 | #####    | #####    |
| 2 NL | 2020-15 | 5 NL-Overall | 3 | 4 | 1.268004 | #####    |
| 2 NL | 2020-15 | 5 NL-Overall | 3 | 5 | 1.119507 | #####    |
| 2 NL | 2020-15 | 5 NL-South M | 1 | 1 | 1.047523 | #####    |
| 2 NL | 2020-15 | 5 NL-South M | 1 | 2 | 1.153227 | #####    |
| 2 NL | 2020-15 | 5 NL-South M | 1 | 3 | #####    | #####    |
| 2 NL | 2020-15 | 5 NL-South M | 1 | 4 | 1.175687 | #####    |
| 2 NL | 2020-15 | 5 NL-South M | 1 | 5 | 1.142425 | #####    |
| 2 NL | 2020-15 | 5 NL-South M | 2 | 1 | #####    | #####    |
| 2 NL | 2020-15 | 5 NL-South M | 2 | 2 | 0.5625   | #####    |
| 2 NL | 2020-15 | 5 NL-South M | 2 | 3 | #####    | #####    |
| 2 NL | 2020-15 | 5 NL-South M | 2 | 4 | 1        | #####    |
| 2 NL | 2020-15 | 5 NL-South M | 2 | 5 | #####    | #####    |
| 2 NL | 2020-15 | 5 NL-South M | 3 | 1 | 1.219967 | #####    |
| 2 NL | 2020-15 | 5 NL-South M | 3 | 2 | 1.583333 | #####    |
| 2 NL | 2020-15 | 5 NL-South M | 3 | 3 | #####    | #####    |
| 2 NL | 2020-15 | 5 NL-South M | 3 | 4 | 1.321429 | #####    |
| 2 NL | 2020-15 | 5 NL-South M | 3 | 5 | 1.47619  | #####    |
| 2 NL | 2020-15 | 5 NL-West N  | 1 | 1 | 1.083743 | #####    |
| 2 NL | 2020-15 | 5 NL-West N  | 1 | 2 | 1.256038 | #####    |
| 2 NL | 2020-15 | 5 NL-West N  | 1 | 3 | 1.103121 | #####    |
| 2 NL | 2020-15 | 5 NL-West N  | 1 | 4 | 1.030015 | #####    |
| 2 NL | 2020-15 | 5 NL-West N  | 1 | 5 | #####    | #####    |
| 2 NL | 2020-15 | 5 NL-West N  | 2 | 1 | 1.100839 | #####    |
| 2 NL | 2020-15 | 5 NL-West N  | 2 | 2 | 1.148148 | #####    |
| 2 NL | 2020-15 | 5 NL-West N  | 2 | 3 | 1.282353 | #####    |
| 2 NL | 2020-15 | 5 NL-West N  | 2 | 4 | #####    | #####    |
| 2 NL | 2020-15 | 5 NL-West N  | 2 | 5 | #####    | #####    |
| 2 NL | 2020-15 | 5 NL-West N  | 3 | 1 | 1.057193 | #####    |
| 2 NL | 2020-15 | 5 NL-West N  | 3 | 2 | 1.4      | #####    |
| 2 NL | 2020-15 | 5 NL-West N  | 3 | 3 | #####    | #####    |
| 2 NL | 2020-15 | 5 NL-West N  | 3 | 4 | 1.170732 | #####    |
| 2 NL | 2020-15 | 5 NL-West N  | 3 | 5 | 1        | #####    |
| 2 UK | 2020-11 | 1 UK-Englan  | 1 | 1 | 5.616689 | #####    |
| 2 UK | 2020-11 | 1 UK-Englan  | 1 | 2 | 6.011901 | 1.072499 |
| 2 UK | 2020-11 | 1 UK-Englan  | 1 | 3 | 6.878364 | #####    |
| 2 UK | 2020-11 | 1 UK-Englan  | 1 | 4 | 5.154708 | #####    |
| 2 UK | 2020-11 | 1 UK-Englan  | 1 | 5 | 3.738201 | #####    |
| 2 UK | 2020-11 | 1 UK-Englan  | 2 | 1 | 6.140661 | #####    |
| 2 UK | 2020-11 | 1 UK-Englan  | 2 | 2 | 9.666667 | 2.197228 |
| 2 UK | 2020-11 | 1 UK-Englan  | 2 | 3 | 7.195652 | 1.010234 |
| 2 UK | 2020-11 | 1 UK-Englan  | 2 | 4 | 4.945946 | #####    |
| 2 UK | 2020-11 | 1 UK-Englan  | 2 | 5 | 3.5      | #####    |
| 2 UK | 2020-11 | 1 UK-Englan  | 3 | 1 | 5.211217 | #####    |
| 2 UK | 2020-11 | 1 UK-Englan  | 3 | 2 | 3.769231 | #####    |
| 2 UK | 2020-11 | 1 UK-Englan  | 3 | 3 | 6.653846 | 1.248684 |
| 2 UK | 2020-11 | 1 UK-Englan  | 3 | 4 | 5.32     | #####    |
| 2 UK | 2020-11 | 1 UK-Englan  | 3 | 5 | 4        | #####    |
| 2 UK | 2020-11 | 1 UK-London  | 1 | 1 | 5.739265 | #####    |
| 2 UK | 2020-11 | 1 UK-London  | 1 | 2 | 6.338015 | 2.27352  |
| 2 UK | 2020-11 | 1 UK-London  | 1 | 3 | 6.231242 | 1.401324 |
| 2 UK | 2020-11 | 1 UK-London  | 1 | 4 | 5.215736 | #####    |

|    |      |         |              |   |   |          |          |  |
|----|------|---------|--------------|---|---|----------|----------|--|
| 1  |      |         |              |   |   |          |          |  |
| 2  |      |         |              |   |   |          |          |  |
| 3  | 2 UK | 2020-11 | 1 UK-London  | 1 | 5 | 3.365622 | #####    |  |
| 4  | 2 UK | 2020-11 | 1 UK-London  | 2 | 1 | 5.474599 | #####    |  |
| 5  | 2 UK | 2020-11 | 1 UK-London  | 2 | 2 | 5.636364 | 2.050225 |  |
| 6  | 2 UK | 2020-11 | 1 UK-London  | 2 | 3 | 5.5      | 1.313011 |  |
| 7  | 2 UK | 2020-11 | 1 UK-London  | 2 | 4 | 5.894737 | #####    |  |
| 8  | 2 UK | 2020-11 | 1 UK-London  | 2 | 5 | 2.8      | #####    |  |
| 9  | 2 UK | 2020-11 | 1 UK-London  | 3 | 1 | 6.010892 | 1.52763  |  |
| 10 | 2 UK | 2020-11 | 1 UK-London  | 3 | 2 | 7        | 3.958381 |  |
| 11 | 2 UK | 2020-11 | 1 UK-London  | 3 | 3 | 7        | 2.500169 |  |
| 12 | 2 UK | 2020-11 | 1 UK-London  | 3 | 4 | 4.1      | 1.59039  |  |
| 13 | 2 UK | 2020-11 | 1 UK-London  | 3 | 5 | 3.6      | #####    |  |
| 14 | 2 UK | 2020-11 | 1 UK-Norther | 1 | 1 | 5.335417 | #####    |  |
| 15 | 2 UK | 2020-11 | 1 UK-Norther | 1 | 2 | 4.370252 | #####    |  |
| 16 | 2 UK | 2020-11 | 1 UK-Norther | 1 | 3 | 6.629279 | #####    |  |
| 17 | 2 UK | 2020-11 | 1 UK-Norther | 1 | 4 | 7.194829 | 2.388316 |  |
| 18 | 2 UK | 2020-11 | 1 UK-Norther | 1 | 5 | 3.377784 | #####    |  |
| 19 | 2 UK | 2020-11 | 1 UK-Norther | 2 | 1 | 5.696427 | #####    |  |
| 20 | 2 UK | 2020-11 | 1 UK-Norther | 2 | 2 | 6        | 1.699788 |  |
| 21 | 2 UK | 2020-11 | 1 UK-Norther | 2 | 3 | 6.272727 | 1.647001 |  |
| 22 | 2 UK | 2020-11 | 1 UK-Norther | 2 | 4 | 6        | 2.237542 |  |
| 23 | 2 UK | 2020-11 | 1 UK-Norther | 2 | 5 | 4        | #####    |  |
| 24 | 2 UK | 2020-11 | 1 UK-Norther | 3 | 1 | 5.130341 | #####    |  |
| 25 | 2 UK | 2020-11 | 1 UK-Norther | 3 | 2 | 3.666667 | #####    |  |
| 26 | 2 UK | 2020-11 | 1 UK-Norther | 3 | 3 | 6.833333 | 1.09086  |  |
| 27 | 2 UK | 2020-11 | 1 UK-Norther | 3 | 4 | 8.285714 | 4.05457  |  |
| 28 | 2 UK | 2020-11 | 1 UK-Norther | 3 | 5 | 3        | #####    |  |
| 29 | 2 UK | 2020-11 | 1 UK-Overall | 1 | 1 | 5.655687 | #####    |  |
| 30 | 2 UK | 2020-11 | 1 UK-Overall | 1 | 2 | 5.929458 | #####    |  |
| 31 | 2 UK | 2020-11 | 1 UK-Overall | 1 | 3 | 6.744255 | #####    |  |
| 32 | 2 UK | 2020-11 | 1 UK-Overall | 1 | 4 | 5.350998 | #####    |  |
| 33 | 2 UK | 2020-11 | 1 UK-Overall | 1 | 5 | 3.645248 | #####    |  |
| 34 | 2 UK | 2020-11 | 1 UK-Overall | 2 | 1 | 6.012819 | #####    |  |
| 35 | 2 UK | 2020-11 | 1 UK-Overall | 2 | 2 | 8.091884 | 1.365038 |  |
| 36 | 2 UK | 2020-11 | 1 UK-Overall | 2 | 3 | 6.780817 | #####    |  |
| 37 | 2 UK | 2020-11 | 1 UK-Overall | 2 | 4 | 5.353614 | #####    |  |
| 38 | 2 UK | 2020-11 | 1 UK-Overall | 2 | 5 | 3.539612 | #####    |  |
| 39 | 2 UK | 2020-11 | 1 UK-Overall | 3 | 1 | 5.361015 | #####    |  |
| 40 | 2 UK | 2020-11 | 1 UK-Overall | 3 | 2 | 4.463376 | #####    |  |
| 41 | 2 UK | 2020-11 | 1 UK-Overall | 3 | 3 | 6.716056 | #####    |  |
| 42 | 2 UK | 2020-11 | 1 UK-Overall | 3 | 4 | 5.348522 | #####    |  |
| 43 | 2 UK | 2020-11 | 1 UK-Overall | 3 | 5 | 3.74845  | #####    |  |
| 44 | 2 UK | 2020-11 | 1 UK-Scotlan | 1 | 1 | 5.860434 | #####    |  |
| 45 | 2 UK | 2020-11 | 1 UK-Scotlan | 1 | 2 | 6.107917 | 1.852874 |  |
| 46 | 2 UK | 2020-11 | 1 UK-Scotlan | 1 | 3 | 6.841701 | #####    |  |
| 47 | 2 UK | 2020-11 | 1 UK-Scotlan | 1 | 4 | 6.104963 | #####    |  |
| 48 | 2 UK | 2020-11 | 1 UK-Scotlan | 1 | 5 | 3.764976 | #####    |  |
| 49 | 2 UK | 2020-11 | 1 UK-Scotlan | 2 | 1 | 6.334754 | #####    |  |
| 50 | 2 UK | 2020-11 | 1 UK-Scotlan | 2 | 2 | 5.727273 | 2.398822 |  |
| 51 | 2 UK | 2020-11 | 1 UK-Scotlan | 2 | 3 | 8.517241 | 1.46845  |  |
| 52 | 2 UK | 2020-11 | 1 UK-Scotlan | 2 | 4 | 6.395833 | #####    |  |
| 53 | 2 UK | 2020-11 | 1 UK-Scotlan | 2 | 5 | 4.151515 | #####    |  |
| 54 | 2 UK | 2020-11 | 1 UK-Scotlan | 3 | 1 | 5.285373 | #####    |  |
| 55 | 2 UK | 2020-11 | 1 UK-Scotlan | 3 | 2 | 6.375    | 2.663222 |  |
| 56 | 2 UK | 2020-11 | 1 UK-Scotlan | 3 | 3 | 5        | 1.05242  |  |
| 57 | 2 UK | 2020-11 | 1 UK-Scotlan | 3 | 4 | 5.666667 | 1.094967 |  |
| 58 | 2 UK | 2020-11 | 1 UK-Scotlan | 3 | 5 | 3        | 1.014753 |  |
| 59 | 2 UK | 2020-11 | 1 UK-Scotlan | 3 | 5 | 3        | 1.014753 |  |
| 60 | 2 UK | 2020-11 | 1 UK-Scotlan | 3 | 5 | 3        | 1.014753 |  |

|    |      |         |              |   |   |          |          |  |
|----|------|---------|--------------|---|---|----------|----------|--|
| 1  |      |         |              |   |   |          |          |  |
| 2  |      |         |              |   |   |          |          |  |
| 3  | 2 UK | 2020-11 | 1 UK-Wales   | 1 | 1 | 5.747229 | #####    |  |
| 4  | 2 UK | 2020-11 | 1 UK-Wales   | 1 | 2 | 5.371401 | 1.559338 |  |
| 5  | 2 UK | 2020-11 | 1 UK-Wales   | 1 | 3 | 6.94661  | 1.10284  |  |
| 6  | 2 UK | 2020-11 | 1 UK-Wales   | 1 | 4 | 5.8611   | #####    |  |
| 7  | 2 UK | 2020-11 | 1 UK-Wales   | 1 | 5 | 2.915897 | #####    |  |
| 8  | 2 UK | 2020-11 | 1 UK-Wales   | 2 | 1 | 5.777801 | #####    |  |
| 9  | 2 UK | 2020-11 | 1 UK-Wales   | 2 | 2 | 8.125    | 2.426822 |  |
| 10 | 2 UK | 2020-11 | 1 UK-Wales   | 2 | 3 | 5.090909 | #####    |  |
| 11 | 2 UK | 2020-11 | 1 UK-Wales   | 2 | 4 | 5.5      | #####    |  |
| 12 | 2 UK | 2020-11 | 1 UK-Wales   | 2 | 5 | 2        | #####    |  |
| 13 | 2 UK | 2020-11 | 1 UK-Wales   | 3 | 1 | 5.727876 | #####    |  |
| 14 | 2 UK | 2020-11 | 1 UK-Wales   | 3 | 2 | 2.666667 | #####    |  |
| 15 | 2 UK | 2020-11 | 1 UK-Wales   | 3 | 3 | 7.933333 | 1.615223 |  |
| 16 | 2 UK | 2020-11 | 1 UK-Wales   | 3 | 4 | 6.214286 | 1.641969 |  |
| 17 | 2 UK | 2020-11 | 1 UK-Wales   | 3 | 5 | 3.166667 | #####    |  |
| 18 | 2 UK | 2020-11 | 2 UK-England | 1 | 1 | 1.795619 | #####    |  |
| 19 | 2 UK | 2020-11 | 2 UK-England | 1 | 2 | 2.105619 | #####    |  |
| 20 | 2 UK | 2020-11 | 2 UK-England | 1 | 3 | 1.956141 | #####    |  |
| 21 | 2 UK | 2020-11 | 2 UK-England | 1 | 4 | 1.508167 | #####    |  |
| 22 | 2 UK | 2020-11 | 2 UK-England | 1 | 5 | 1.455963 | #####    |  |
| 23 | 2 UK | 2020-11 | 2 UK-England | 2 | 1 | 1.744871 | #####    |  |
| 24 | 2 UK | 2020-11 | 2 UK-England | 2 | 2 | 2.029412 | #####    |  |
| 25 | 2 UK | 2020-11 | 2 UK-England | 2 | 3 | 1.934211 | #####    |  |
| 26 | 2 UK | 2020-11 | 2 UK-England | 2 | 4 | 1.579439 | #####    |  |
| 27 | 2 UK | 2020-11 | 2 UK-England | 2 | 5 | 1.352113 | #####    |  |
| 28 | 2 UK | 2020-11 | 2 UK-England | 3 | 1 | 1.834507 | #####    |  |
| 29 | 2 UK | 2020-11 | 2 UK-England | 3 | 2 | 2.148148 | #####    |  |
| 30 | 2 UK | 2020-11 | 2 UK-England | 3 | 3 | 1.973684 | #####    |  |
| 31 | 2 UK | 2020-11 | 2 UK-England | 3 | 4 | 1.450704 | #####    |  |
| 32 | 2 UK | 2020-11 | 2 UK-England | 3 | 5 | 1.563636 | #####    |  |
| 33 | 2 UK | 2020-11 | 2 UK-London  | 1 | 1 | 1.619178 | #####    |  |
| 34 | 2 UK | 2020-11 | 2 UK-London  | 1 | 2 | 2.145792 | #####    |  |
| 35 | 2 UK | 2020-11 | 2 UK-London  | 1 | 3 | 1.415956 | #####    |  |
| 36 | 2 UK | 2020-11 | 2 UK-London  | 1 | 4 | 1.629026 | #####    |  |
| 37 | 2 UK | 2020-11 | 2 UK-London  | 1 | 5 | 1.116137 | #####    |  |
| 38 | 2 UK | 2020-11 | 2 UK-London  | 2 | 1 | 1.794729 | #####    |  |
| 39 | 2 UK | 2020-11 | 2 UK-London  | 2 | 2 | 2.105263 | #####    |  |
| 40 | 2 UK | 2020-11 | 2 UK-London  | 2 | 3 | 1.391304 | #####    |  |
| 41 | 2 UK | 2020-11 | 2 UK-London  | 2 | 4 | 2.173913 | #####    |  |
| 42 | 2 UK | 2020-11 | 2 UK-London  | 2 | 5 | 1.555556 | #####    |  |
| 43 | 2 UK | 2020-11 | 2 UK-London  | 3 | 1 | 1.500335 | #####    |  |
| 44 | 2 UK | 2020-11 | 2 UK-London  | 3 | 2 | 2.181818 | #####    |  |
| 45 | 2 UK | 2020-11 | 2 UK-London  | 3 | 3 | 1.428571 | #####    |  |
| 46 | 2 UK | 2020-11 | 2 UK-London  | 3 | 4 | 1.136364 | #####    |  |
| 47 | 2 UK | 2020-11 | 2 UK-London  | 3 | 5 | #####    | #####    |  |
| 48 | 2 UK | 2020-11 | 2 UK-Norther | 1 | 1 | 2.427783 | #####    |  |
| 49 | 2 UK | 2020-11 | 2 UK-Norther | 1 | 2 | 2.778613 | #####    |  |
| 50 | 2 UK | 2020-11 | 2 UK-Norther | 1 | 3 | 2.661201 | #####    |  |
| 51 | 2 UK | 2020-11 | 2 UK-Norther | 1 | 4 | 2.00247  | #####    |  |
| 52 | 2 UK | 2020-11 | 2 UK-Norther | 1 | 5 | 1.589962 | #####    |  |
| 53 | 2 UK | 2020-11 | 2 UK-Norther | 2 | 1 | 2.43633  | #####    |  |
| 54 | 2 UK | 2020-11 | 2 UK-Norther | 2 | 2 | 2.6      | 0.357795 |  |
| 55 | 2 UK | 2020-11 | 2 UK-Norther | 2 | 3 | 2.833333 | #####    |  |
| 56 | 2 UK | 2020-11 | 2 UK-Norther | 2 | 4 | 1.647059 | #####    |  |
| 57 | 2 UK | 2020-11 | 2 UK-Norther | 2 | 5 | 2        | #####    |  |
| 58 | 2 UK | 2020-11 | 2 UK-Norther | 3 | 1 | 2.422036 | #####    |  |
| 59 | 2 UK | 2020-11 | 2 UK-Norther | 3 |   |          |          |  |
| 60 | 2 UK | 2020-11 | 2 UK-Norther | 3 |   |          |          |  |

|    |      |         |              |   |   |          |       |  |  |
|----|------|---------|--------------|---|---|----------|-------|--|--|
| 1  |      |         |              |   |   |          |       |  |  |
| 2  |      |         |              |   |   |          |       |  |  |
| 3  | 2 UK | 2020-11 | 2 UK-Norther | 3 | 2 | 2.875    | ##### |  |  |
| 4  | 2 UK | 2020-11 | 2 UK-Norther | 3 | 3 | 2.5      | ##### |  |  |
| 5  | 2 UK | 2020-11 | 2 UK-Norther | 3 | 4 | 2.25     | ##### |  |  |
| 6  | 2 UK | 2020-11 | 2 UK-Norther | 3 | 5 | 1.363636 | ##### |  |  |
| 7  | 2 UK | 2020-11 | 2 UK-Overall | 1 | 1 | 1.79876  | ##### |  |  |
| 8  | 2 UK | 2020-11 | 2 UK-Overall | 1 | 2 | 2.131249 | ##### |  |  |
| 9  | 2 UK | 2020-11 | 2 UK-Overall | 1 | 3 | 1.854804 | ##### |  |  |
| 10 | 2 UK | 2020-11 | 2 UK-Overall | 1 | 4 | 1.596671 | ##### |  |  |
| 11 | 2 UK | 2020-11 | 2 UK-Overall | 1 | 5 | 1.405234 | ##### |  |  |
| 12 | 2 UK | 2020-11 | 2 UK-Overall | 2 | 1 | 1.80544  | ##### |  |  |
| 13 | 2 UK | 2020-11 | 2 UK-Overall | 2 | 2 | 2.050094 | ##### |  |  |
| 14 | 2 UK | 2020-11 | 2 UK-Overall | 2 | 3 | 1.904487 | ##### |  |  |
| 15 | 2 UK | 2020-11 | 2 UK-Overall | 2 | 4 | 1.742456 | ##### |  |  |
| 16 | 2 UK | 2020-11 | 2 UK-Overall | 2 | 5 | 1.380354 | ##### |  |  |
| 17 | 2 UK | 2020-11 | 2 UK-Overall | 3 | 1 | 1.793706 | ##### |  |  |
| 18 | 2 UK | 2020-11 | 2 UK-Overall | 3 | 2 | 2.180605 | ##### |  |  |
| 19 | 2 UK | 2020-11 | 2 UK-Overall | 3 | 3 | 1.819148 | ##### |  |  |
| 20 | 2 UK | 2020-11 | 2 UK-Overall | 3 | 4 | 1.468711 | ##### |  |  |
| 21 | 2 UK | 2020-11 | 2 UK-Overall | 3 | 5 | 1.429573 | ##### |  |  |
| 22 | 2 UK | 2020-11 | 2 UK-Scotlan | 1 | 1 | 1.897577 | ##### |  |  |
| 23 | 2 UK | 2020-11 | 2 UK-Scotlan | 1 | 2 | 2.014399 | ##### |  |  |
| 24 | 2 UK | 2020-11 | 2 UK-Scotlan | 1 | 3 | 2.017413 | ##### |  |  |
| 25 | 2 UK | 2020-11 | 2 UK-Scotlan | 1 | 4 | 1.93109  | ##### |  |  |
| 26 | 2 UK | 2020-11 | 2 UK-Scotlan | 1 | 5 | 1.409601 | ##### |  |  |
| 27 | 2 UK | 2020-11 | 2 UK-Scotlan | 2 | 1 | 1.825862 | ##### |  |  |
| 28 | 2 UK | 2020-11 | 2 UK-Scotlan | 2 | 2 | 1.666667 | ##### |  |  |
| 29 | 2 UK | 2020-11 | 2 UK-Scotlan | 2 | 3 | 2.090909 | ##### |  |  |
| 30 | 2 UK | 2020-11 | 2 UK-Scotlan | 2 | 4 | 1.986301 | ##### |  |  |
| 31 | 2 UK | 2020-11 | 2 UK-Scotlan | 2 | 5 | 1.365854 | ##### |  |  |
| 32 | 2 UK | 2020-11 | 2 UK-Scotlan | 3 | 1 | 1.967025 | ##### |  |  |
| 33 | 2 UK | 2020-11 | 2 UK-Scotlan | 3 | 2 | 2.210526 | ##### |  |  |
| 34 | 2 UK | 2020-11 | 2 UK-Scotlan | 3 | 3 | 1.95     | ##### |  |  |
| 35 | 2 UK | 2020-11 | 2 UK-Scotlan | 3 | 4 | 1.852941 | ##### |  |  |
| 36 | 2 UK | 2020-11 | 2 UK-Scotlan | 3 | 5 | 1.47619  | ##### |  |  |
| 37 | 2 UK | 2020-11 | 2 UK-Wales   | 1 | 1 | 1.79724  | ##### |  |  |
| 38 | 2 UK | 2020-11 | 2 UK-Wales   | 1 | 2 | 2.041451 | ##### |  |  |
| 39 | 2 UK | 2020-11 | 2 UK-Wales   | 1 | 3 | 1.922814 | ##### |  |  |
| 40 | 2 UK | 2020-11 | 2 UK-Wales   | 1 | 4 | 1.704277 | ##### |  |  |
| 41 | 2 UK | 2020-11 | 2 UK-Wales   | 1 | 5 | 1.06845  | ##### |  |  |
| 42 | 2 UK | 2020-11 | 2 UK-Wales   | 2 | 1 | 2.116657 | ##### |  |  |
| 43 | 2 UK | 2020-11 | 2 UK-Wales   | 2 | 2 | 2.333333 | ##### |  |  |
| 44 | 2 UK | 2020-11 | 2 UK-Wales   | 2 | 3 | 2.352941 | ##### |  |  |
| 45 | 2 UK | 2020-11 | 2 UK-Wales   | 2 | 4 | 1.923077 | ##### |  |  |
| 46 | 2 UK | 2020-11 | 2 UK-Wales   | 2 | 5 | 1.214286 | ##### |  |  |
| 47 | 2 UK | 2020-11 | 2 UK-Wales   | 3 | 1 | 1.59746  | ##### |  |  |
| 48 | 2 UK | 2020-11 | 2 UK-Wales   | 3 | 2 | 1.857143 | ##### |  |  |
| 49 | 2 UK | 2020-11 | 2 UK-Wales   | 3 | 3 | 1.681818 | ##### |  |  |
| 50 | 2 UK | 2020-11 | 2 UK-Wales   | 3 | 4 | 1.5      | ##### |  |  |
| 51 | 2 UK | 2020-11 | 2 UK-Wales   | 3 | 5 | 1        | ##### |  |  |
| 52 | 2 UK | 2020-11 | 3 UK-Englan  | 1 | 1 | 0        | 0     |  |  |
| 53 | 2 UK | 2020-11 | 3 UK-Englan  | 1 | 2 | 0        | 0     |  |  |
| 54 | 2 UK | 2020-11 | 3 UK-Englan  | 1 | 3 | 0        | 0     |  |  |
| 55 | 2 UK | 2020-11 | 3 UK-Englan  | 1 | 4 | 0        | 0     |  |  |
| 56 | 2 UK | 2020-11 | 3 UK-Englan  | 1 | 5 | 0        | 0     |  |  |
| 57 | 2 UK | 2020-11 | 3 UK-Englan  | 2 | 1 | 0        | 0     |  |  |
| 58 | 2 UK | 2020-11 | 3 UK-Englan  | 2 | 2 | 0        | 0     |  |  |
| 59 | 2 UK | 2020-11 | 3 UK-Englan  | 2 | 2 | 0        | 0     |  |  |
| 60 | 2 UK | 2020-11 | 3 UK-Englan  | 2 | 2 | 0        | 0     |  |  |

|    |      |         |               |   |   |   |   |
|----|------|---------|---------------|---|---|---|---|
| 1  |      |         |               |   |   |   |   |
| 2  |      |         |               |   |   |   |   |
| 3  | 2 UK | 2020-11 | 3 UK-England  | 2 | 3 | 0 | 0 |
| 4  | 2 UK | 2020-11 | 3 UK-England  | 2 | 4 | 0 | 0 |
| 5  | 2 UK | 2020-11 | 3 UK-England  | 2 | 5 | 0 | 0 |
| 6  | 2 UK | 2020-11 | 3 UK-England  | 3 | 1 | 0 | 0 |
| 7  | 2 UK | 2020-11 | 3 UK-England  | 3 | 2 | 0 | 0 |
| 8  | 2 UK | 2020-11 | 3 UK-England  | 3 | 3 | 0 | 0 |
| 9  | 2 UK | 2020-11 | 3 UK-England  | 3 | 4 | 0 | 0 |
| 10 | 2 UK | 2020-11 | 3 UK-England  | 3 | 5 | 0 | 0 |
| 11 | 2 UK | 2020-11 | 3 UK-London   | 1 | 1 | 0 | 0 |
| 12 | 2 UK | 2020-11 | 3 UK-London   | 1 | 2 | 0 | 0 |
| 13 | 2 UK | 2020-11 | 3 UK-London   | 1 | 3 | 0 | 0 |
| 14 | 2 UK | 2020-11 | 3 UK-London   | 1 | 4 | 0 | 0 |
| 15 | 2 UK | 2020-11 | 3 UK-London   | 1 | 5 | 0 | 0 |
| 16 | 2 UK | 2020-11 | 3 UK-London   | 2 | 1 | 0 | 0 |
| 17 | 2 UK | 2020-11 | 3 UK-London   | 2 | 2 | 0 | 0 |
| 18 | 2 UK | 2020-11 | 3 UK-London   | 2 | 3 | 0 | 0 |
| 19 | 2 UK | 2020-11 | 3 UK-London   | 2 | 4 | 0 | 0 |
| 20 | 2 UK | 2020-11 | 3 UK-London   | 2 | 5 | 0 | 0 |
| 21 | 2 UK | 2020-11 | 3 UK-London   | 3 | 1 | 0 | 0 |
| 22 | 2 UK | 2020-11 | 3 UK-London   | 3 | 2 | 0 | 0 |
| 23 | 2 UK | 2020-11 | 3 UK-London   | 3 | 3 | 0 | 0 |
| 24 | 2 UK | 2020-11 | 3 UK-London   | 3 | 4 | 0 | 0 |
| 25 | 2 UK | 2020-11 | 3 UK-London   | 3 | 5 | 0 | 0 |
| 26 | 2 UK | 2020-11 | 3 UK-London   | 3 | 5 | 0 | 0 |
| 27 | 2 UK | 2020-11 | 3 UK-Norther  | 1 | 1 | 0 | 0 |
| 28 | 2 UK | 2020-11 | 3 UK-Norther  | 1 | 2 | 0 | 0 |
| 29 | 2 UK | 2020-11 | 3 UK-Norther  | 1 | 3 | 0 | 0 |
| 30 | 2 UK | 2020-11 | 3 UK-Norther  | 1 | 4 | 0 | 0 |
| 31 | 2 UK | 2020-11 | 3 UK-Norther  | 1 | 5 | 0 | 0 |
| 32 | 2 UK | 2020-11 | 3 UK-Norther  | 2 | 1 | 0 | 0 |
| 33 | 2 UK | 2020-11 | 3 UK-Norther  | 2 | 2 | 0 | 0 |
| 34 | 2 UK | 2020-11 | 3 UK-Norther  | 2 | 3 | 0 | 0 |
| 35 | 2 UK | 2020-11 | 3 UK-Norther  | 2 | 4 | 0 | 0 |
| 36 | 2 UK | 2020-11 | 3 UK-Norther  | 2 | 5 | 0 | 0 |
| 37 | 2 UK | 2020-11 | 3 UK-Norther  | 3 | 1 | 0 | 0 |
| 38 | 2 UK | 2020-11 | 3 UK-Norther  | 3 | 2 | 0 | 0 |
| 39 | 2 UK | 2020-11 | 3 UK-Norther  | 3 | 3 | 0 | 0 |
| 40 | 2 UK | 2020-11 | 3 UK-Norther  | 3 | 4 | 0 | 0 |
| 41 | 2 UK | 2020-11 | 3 UK-Norther  | 3 | 5 | 0 | 0 |
| 42 | 2 UK | 2020-11 | 3 UK-Overall  | 1 | 1 | 0 | 0 |
| 43 | 2 UK | 2020-11 | 3 UK-Overall  | 1 | 2 | 0 | 0 |
| 44 | 2 UK | 2020-11 | 3 UK-Overall  | 1 | 3 | 0 | 0 |
| 45 | 2 UK | 2020-11 | 3 UK-Overall  | 1 | 4 | 0 | 0 |
| 46 | 2 UK | 2020-11 | 3 UK-Overall  | 1 | 5 | 0 | 0 |
| 47 | 2 UK | 2020-11 | 3 UK-Overall  | 2 | 1 | 0 | 0 |
| 48 | 2 UK | 2020-11 | 3 UK-Overall  | 2 | 2 | 0 | 0 |
| 49 | 2 UK | 2020-11 | 3 UK-Overall  | 2 | 3 | 0 | 0 |
| 50 | 2 UK | 2020-11 | 3 UK-Overall  | 2 | 4 | 0 | 0 |
| 51 | 2 UK | 2020-11 | 3 UK-Overall  | 2 | 5 | 0 | 0 |
| 52 | 2 UK | 2020-11 | 3 UK-Overall  | 3 | 1 | 0 | 0 |
| 53 | 2 UK | 2020-11 | 3 UK-Overall  | 3 | 2 | 0 | 0 |
| 54 | 2 UK | 2020-11 | 3 UK-Overall  | 3 | 3 | 0 | 0 |
| 55 | 2 UK | 2020-11 | 3 UK-Overall  | 3 | 4 | 0 | 0 |
| 56 | 2 UK | 2020-11 | 3 UK-Overall  | 3 | 5 | 0 | 0 |
| 57 | 2 UK | 2020-11 | 3 UK-Scotland | 1 | 1 | 0 | 0 |
| 58 | 2 UK | 2020-11 | 3 UK-Scotland | 1 | 2 | 0 | 0 |
| 59 | 2 UK | 2020-11 | 3 UK-Scotland | 1 | 3 | 0 | 0 |
| 60 | 2 UK | 2020-11 | 3 UK-Scotland | 1 | 3 | 0 | 0 |



|    |      |         |              |   |   |          |          |  |
|----|------|---------|--------------|---|---|----------|----------|--|
| 1  |      |         |              |   |   |          |          |  |
| 2  |      |         |              |   |   |          |          |  |
| 3  | 2 UK | 2020-11 | 3 UK-Scotlan | 1 | 4 | 0        | 0        |  |
| 4  | 2 UK | 2020-11 | 3 UK-Scotlan | 1 | 5 | 0        | 0        |  |
| 5  | 2 UK | 2020-11 | 3 UK-Scotlan | 2 | 1 | 0        | 0        |  |
| 6  | 2 UK | 2020-11 | 3 UK-Scotlan | 2 | 2 | 0        | 0        |  |
| 7  | 2 UK | 2020-11 | 3 UK-Scotlan | 2 | 3 | 0        | 0        |  |
| 8  | 2 UK | 2020-11 | 3 UK-Scotlan | 2 | 4 | 0        | 0        |  |
| 9  | 2 UK | 2020-11 | 3 UK-Scotlan | 2 | 5 | 0        | 0        |  |
| 10 | 2 UK | 2020-11 | 3 UK-Scotlan | 3 | 1 | 0        | 0        |  |
| 11 | 2 UK | 2020-11 | 3 UK-Scotlan | 3 | 2 | 0        | 0        |  |
| 12 | 2 UK | 2020-11 | 3 UK-Scotlan | 3 | 3 | 0        | 0        |  |
| 13 | 2 UK | 2020-11 | 3 UK-Scotlan | 3 | 4 | 0        | 0        |  |
| 14 | 2 UK | 2020-11 | 3 UK-Scotlan | 3 | 5 | 0        | 0        |  |
| 15 | 2 UK | 2020-11 | 3 UK-Wales   | 1 | 1 | 0        | 0        |  |
| 16 | 2 UK | 2020-11 | 3 UK-Wales   | 1 | 2 | 0        | 0        |  |
| 17 | 2 UK | 2020-11 | 3 UK-Wales   | 1 | 3 | 0        | 0        |  |
| 18 | 2 UK | 2020-11 | 3 UK-Wales   | 1 | 4 | 0        | 0        |  |
| 19 | 2 UK | 2020-11 | 3 UK-Wales   | 1 | 5 | 0        | 0        |  |
| 20 | 2 UK | 2020-11 | 3 UK-Wales   | 2 | 1 | 0        | 0        |  |
| 21 | 2 UK | 2020-11 | 3 UK-Wales   | 2 | 2 | 0        | 0        |  |
| 22 | 2 UK | 2020-11 | 3 UK-Wales   | 2 | 3 | 0        | 0        |  |
| 23 | 2 UK | 2020-11 | 3 UK-Wales   | 2 | 4 | 0        | 0        |  |
| 24 | 2 UK | 2020-11 | 3 UK-Wales   | 2 | 5 | 0        | 0        |  |
| 25 | 2 UK | 2020-11 | 3 UK-Wales   | 3 | 1 | 0        | 0        |  |
| 26 | 2 UK | 2020-11 | 3 UK-Wales   | 3 | 2 | 0        | 0        |  |
| 27 | 2 UK | 2020-11 | 3 UK-Wales   | 3 | 3 | 0        | 0        |  |
| 28 | 2 UK | 2020-11 | 3 UK-Wales   | 3 | 4 | 0        | 0        |  |
| 29 | 2 UK | 2020-11 | 3 UK-Wales   | 3 | 5 | 0        | 0        |  |
| 30 | 2 UK | 2020-11 | 4 UK-Englan  | 1 | 1 | 2.824332 | #####    |  |
| 31 | 2 UK | 2020-11 | 4 UK-Englan  | 1 | 2 | 2.336509 | #####    |  |
| 32 | 2 UK | 2020-11 | 4 UK-Englan  | 1 | 3 | 4.901934 | #####    |  |
| 33 | 2 UK | 2020-11 | 4 UK-Englan  | 1 | 4 | 2.788113 | #####    |  |
| 34 | 2 UK | 2020-11 | 4 UK-Englan  | 1 | 5 | #####    | #####    |  |
| 35 | 2 UK | 2020-11 | 4 UK-Englan  | 2 | 1 | 2.602697 | #####    |  |
| 36 | 2 UK | 2020-11 | 4 UK-Englan  | 2 | 2 | 3.382353 | 1.191177 |  |
| 37 | 2 UK | 2020-11 | 4 UK-Englan  | 2 | 3 | 4.079365 | #####    |  |
| 38 | 2 UK | 2020-11 | 4 UK-Englan  | 2 | 4 | 2.428571 | #####    |  |
| 39 | 2 UK | 2020-11 | 4 UK-Englan  | 2 | 5 | #####    | #####    |  |
| 40 | 2 UK | 2020-11 | 4 UK-Englan  | 3 | 1 | 2.982175 | #####    |  |
| 41 | 2 UK | 2020-11 | 4 UK-Englan  | 3 | 2 | 1.793103 | #####    |  |
| 42 | 2 UK | 2020-11 | 4 UK-Englan  | 3 | 3 | 5.447368 | 1.255377 |  |
| 43 | 2 UK | 2020-11 | 4 UK-Englan  | 3 | 4 | 3.089552 | #####    |  |
| 44 | 2 UK | 2020-11 | 4 UK-Englan  | 3 | 5 | 0.546875 | #####    |  |
| 45 | 2 UK | 2020-11 | 4 UK-London  | 1 | 1 | 3.30637  | #####    |  |
| 46 | 2 UK | 2020-11 | 4 UK-London  | 1 | 2 | 2.870702 | 1.455252 |  |
| 47 | 2 UK | 2020-11 | 4 UK-London  | 1 | 3 | 4.779142 | 1.470114 |  |
| 48 | 2 UK | 2020-11 | 4 UK-London  | 1 | 4 | 2.552761 | #####    |  |
| 49 | 2 UK | 2020-11 | 4 UK-London  | 1 | 5 | #####    | #####    |  |
| 50 | 2 UK | 2020-11 | 4 UK-London  | 2 | 1 | 1.809692 | #####    |  |
| 51 | 2 UK | 2020-11 | 4 UK-London  | 2 | 2 | 1.25     | #####    |  |
| 52 | 2 UK | 2020-11 | 4 UK-London  | 2 | 3 | 2.727273 | 1.130391 |  |
| 53 | 2 UK | 2020-11 | 4 UK-London  | 2 | 4 | 1.666667 | #####    |  |
| 54 | 2 UK | 2020-11 | 4 UK-London  | 2 | 5 | 0        | 0        |  |
| 55 | 2 UK | 2020-11 | 4 UK-London  | 3 | 1 | 4.477953 | 1.254547 |  |
| 56 | 2 UK | 2020-11 | 4 UK-London  | 3 | 2 | 4.153846 | 2.475719 |  |
| 57 | 2 UK | 2020-11 | 4 UK-London  | 3 | 3 | 6.285714 | 2.354981 |  |
| 58 | 2 UK | 2020-11 | 4 UK-London  | 3 | 4 | 3.428571 | 1.224497 |  |
| 59 | 2 UK | 2020-11 | 4 UK-London  | 3 |   |          |          |  |
| 60 | 2 UK | 2020-11 | 4 UK-London  | 3 |   |          |          |  |

|    |      |         |              |   |   |          |          |
|----|------|---------|--------------|---|---|----------|----------|
| 1  |      |         |              |   |   |          |          |
| 2  |      |         |              |   |   |          |          |
| 3  | 2 UK | 2020-11 | 4 UK-London  | 3 | 5 | #####    | #####    |
| 4  | 2 UK | 2020-11 | 4 UK-Norther | 1 | 1 | 2.333533 | #####    |
| 5  | 2 UK | 2020-11 | 4 UK-Norther | 1 | 2 | 1.180922 | #####    |
| 6  | 2 UK | 2020-11 | 4 UK-Norther | 1 | 3 | 3.847623 | 1.327049 |
| 7  | 2 UK | 2020-11 | 4 UK-Norther | 1 | 4 | 3.847171 | 1.386623 |
| 8  | 2 UK | 2020-11 | 4 UK-Norther | 1 | 5 | #####    | #####    |
| 9  | 2 UK | 2020-11 | 4 UK-Norther | 2 | 1 | 2.456727 | #####    |
| 10 | 2 UK | 2020-11 | 4 UK-Norther | 2 | 2 | 1.6      | 1.43118  |
| 11 | 2 UK | 2020-11 | 4 UK-Norther | 2 | 3 | 3.333333 | 1.318601 |
| 12 | 2 UK | 2020-11 | 4 UK-Norther | 2 | 4 | 4.222222 | 1.634153 |
| 13 | 2 UK | 2020-11 | 4 UK-Norther | 2 | 5 | #####    | #####    |
| 14 | 2 UK | 2020-11 | 4 UK-Norther | 3 | 1 | 2.257594 | #####    |
| 15 | 2 UK | 2020-11 | 4 UK-Norther | 3 | 2 | 1        | #####    |
| 16 | 2 UK | 2020-11 | 4 UK-Norther | 3 | 3 | 4.222222 | 2.077518 |
| 17 | 2 UK | 2020-11 | 4 UK-Norther | 3 | 4 | 3.545455 | 2.125798 |
| 18 | 2 UK | 2020-11 | 4 UK-Norther | 3 | 5 | #####    | #####    |
| 19 | 2 UK | 2020-11 | 4 UK-Overall | 1 | 1 | 2.804125 | #####    |
| 20 | 2 UK | 2020-11 | 4 UK-Overall | 1 | 2 | 2.29611  | #####    |
| 21 | 2 UK | 2020-11 | 4 UK-Overall | 1 | 3 | 4.592833 | #####    |
| 22 | 2 UK | 2020-11 | 4 UK-Overall | 1 | 4 | 2.762923 | #####    |
| 23 | 2 UK | 2020-11 | 4 UK-Overall | 1 | 5 | #####    | #####    |
| 24 | 2 UK | 2020-11 | 4 UK-Overall | 2 | 1 | 2.455621 | #####    |
| 25 | 2 UK | 2020-11 | 4 UK-Overall | 2 | 2 | 2.72677  | #####    |
| 26 | 2 UK | 2020-11 | 4 UK-Overall | 2 | 3 | 3.641707 | #####    |
| 27 | 2 UK | 2020-11 | 4 UK-Overall | 2 | 4 | 2.459735 | #####    |
| 28 | 2 UK | 2020-11 | 4 UK-Overall | 2 | 5 | #####    | #####    |
| 29 | 2 UK | 2020-11 | 4 UK-Overall | 3 | 1 | 3.061431 | #####    |
| 30 | 2 UK | 2020-11 | 4 UK-Overall | 3 | 2 | 2.047089 | #####    |
| 31 | 2 UK | 2020-11 | 4 UK-Overall | 3 | 3 | 5.245721 | #####    |
| 32 | 2 UK | 2020-11 | 4 UK-Overall | 3 | 4 | 3.039779 | #####    |
| 33 | 2 UK | 2020-11 | 4 UK-Overall | 3 | 5 | #####    | #####    |
| 34 | 2 UK | 2020-11 | 4 UK-Overall | 3 | 5 | #####    | #####    |
| 35 | 2 UK | 2020-11 | 4 UK-Scotlan | 1 | 1 | 2.458729 | #####    |
| 36 | 2 UK | 2020-11 | 4 UK-Scotlan | 1 | 2 | 2.459539 | #####    |
| 37 | 2 UK | 2020-11 | 4 UK-Scotlan | 1 | 3 | 3.754928 | #####    |
| 38 | 2 UK | 2020-11 | 4 UK-Scotlan | 1 | 4 | 2.514325 | #####    |
| 39 | 2 UK | 2020-11 | 4 UK-Scotlan | 1 | 5 | #####    | #####    |
| 40 | 2 UK | 2020-11 | 4 UK-Scotlan | 2 | 1 | 2.708548 | #####    |
| 41 | 2 UK | 2020-11 | 4 UK-Scotlan | 2 | 2 | 2.6      | 1.364643 |
| 42 | 2 UK | 2020-11 | 4 UK-Scotlan | 2 | 3 | 3.977273 | 1.074997 |
| 43 | 2 UK | 2020-11 | 4 UK-Scotlan | 2 | 4 | 3.044776 | #####    |
| 44 | 2 UK | 2020-11 | 4 UK-Scotlan | 2 | 5 | #####    | #####    |
| 45 | 2 UK | 2020-11 | 4 UK-Scotlan | 3 | 1 | 2.178657 | #####    |
| 46 | 2 UK | 2020-11 | 4 UK-Scotlan | 3 | 2 | 2.357143 | 1.197898 |
| 47 | 2 UK | 2020-11 | 4 UK-Scotlan | 3 | 3 | 3.5      | 1.52848  |
| 48 | 2 UK | 2020-11 | 4 UK-Scotlan | 3 | 4 | 1.733333 | #####    |
| 49 | 2 UK | 2020-11 | 4 UK-Scotlan | 3 | 5 | 0.25     | #####    |
| 50 | 2 UK | 2020-11 | 4 UK-Wales   | 1 | 1 | 2.228657 | #####    |
| 51 | 2 UK | 2020-11 | 4 UK-Wales   | 1 | 2 | 1.334329 | #####    |
| 52 | 2 UK | 2020-11 | 4 UK-Wales   | 1 | 3 | 3.269335 | #####    |
| 53 | 2 UK | 2020-11 | 4 UK-Wales   | 1 | 4 | 3.035128 | #####    |
| 54 | 2 UK | 2020-11 | 4 UK-Wales   | 1 | 5 | #####    | #####    |
| 55 | 2 UK | 2020-11 | 4 UK-Wales   | 2 | 1 | 2.205185 | #####    |
| 56 | 2 UK | 2020-11 | 4 UK-Wales   | 2 | 2 | 2.75     | 1.367972 |
| 57 | 2 UK | 2020-11 | 4 UK-Wales   | 2 | 3 | 2.225806 | #####    |
| 58 | 2 UK | 2020-11 | 4 UK-Wales   | 2 | 4 | 2.852941 | #####    |
| 59 | 2 UK | 2020-11 | 4 UK-Wales   | 2 | 5 | 0.1      | #####    |
| 60 | 2 UK | 2020-11 | 4 UK-Wales   | 2 | 5 | 0.1      | #####    |

|    |      |         |              |   |   |          |          |  |
|----|------|---------|--------------|---|---|----------|----------|--|
| 1  |      |         |              |   |   |          |          |  |
| 2  |      |         |              |   |   |          |          |  |
| 3  | 2 UK | 2020-11 | 4 UK-Wales   | 3 | 1 | 2.24169  | #####    |  |
| 4  | 2 UK | 2020-11 | 4 UK-Wales   | 3 | 2 | 0.5      | #####    |  |
| 5  | 2 UK | 2020-11 | 4 UK-Wales   | 3 | 3 | 3.703704 | 1.039505 |  |
| 6  | 2 UK | 2020-11 | 4 UK-Wales   | 3 | 4 | 3.190476 | 1.421696 |  |
| 7  | 2 UK | 2020-11 | 4 UK-Wales   | 3 | 5 | #####    | #####    |  |
| 8  | 2 UK | 2020-11 | 5 UK-England | 1 | 1 | 1.727896 | #####    |  |
| 9  | 2 UK | 2020-11 | 5 UK-England | 1 | 2 | 1.611949 | #####    |  |
| 10 | 2 UK | 2020-11 | 5 UK-England | 1 | 3 | 1.581076 | #####    |  |
| 11 | 2 UK | 2020-11 | 5 UK-England | 1 | 4 | 1.702517 | #####    |  |
| 12 | 2 UK | 2020-11 | 5 UK-England | 1 | 5 | 2.239965 | #####    |  |
| 13 | 2 UK | 2020-11 | 5 UK-England | 2 | 1 | 1.780392 | #####    |  |
| 14 | 2 UK | 2020-11 | 5 UK-England | 2 | 2 | 1.5625   | #####    |  |
| 15 | 2 UK | 2020-11 | 5 UK-England | 2 | 3 | 1.676471 | #####    |  |
| 16 | 2 UK | 2020-11 | 5 UK-England | 2 | 4 | 1.911111 | #####    |  |
| 17 | 2 UK | 2020-11 | 5 UK-England | 2 | 5 | 2.050847 | #####    |  |
| 18 | 2 UK | 2020-11 | 5 UK-England | 3 | 1 | 1.686644 | #####    |  |
| 19 | 2 UK | 2020-11 | 5 UK-England | 3 | 2 | 1.64     | #####    |  |
| 20 | 2 UK | 2020-11 | 5 UK-England | 3 | 3 | 1.5      | #####    |  |
| 21 | 2 UK | 2020-11 | 5 UK-England | 3 | 4 | 1.526316 | #####    |  |
| 22 | 2 UK | 2020-11 | 5 UK-England | 3 | 5 | 2.434783 | #####    |  |
| 23 | 2 UK | 2020-11 | 5 UK-England | 3 | 5 | 2.434783 | #####    |  |
| 24 | 2 UK | 2020-11 | 5 UK-London  | 1 | 1 | 1.914964 | #####    |  |
| 25 | 2 UK | 2020-11 | 5 UK-London  | 1 | 2 | 1.197125 | #####    |  |
| 26 | 2 UK | 2020-11 | 5 UK-London  | 1 | 3 | 2.352549 | #####    |  |
| 27 | 2 UK | 2020-11 | 5 UK-London  | 1 | 4 | 1.937218 | #####    |  |
| 28 | 2 UK | 2020-11 | 5 UK-London  | 1 | 5 | 2.073329 | #####    |  |
| 29 | 2 UK | 2020-11 | 5 UK-London  | 2 | 1 | 1.934065 | #####    |  |
| 30 | 2 UK | 2020-11 | 5 UK-London  | 2 | 2 | 1.866667 | #####    |  |
| 31 | 2 UK | 2020-11 | 5 UK-London  | 2 | 3 | 1.894737 | #####    |  |
| 32 | 2 UK | 2020-11 | 5 UK-London  | 2 | 4 | 2.095238 | #####    |  |
| 33 | 2 UK | 2020-11 | 5 UK-London  | 2 | 5 | 1.833333 | #####    |  |
| 34 | 2 UK | 2020-11 | 5 UK-London  | 3 | 1 | 1.901554 | #####    |  |
| 35 | 2 UK | 2020-11 | 5 UK-London  | 3 | 2 | #####    | #####    |  |
| 36 | 2 UK | 2020-11 | 5 UK-London  | 3 | 3 | 2.642857 | #####    |  |
| 37 | 2 UK | 2020-11 | 5 UK-London  | 3 | 4 | 1.777778 | #####    |  |
| 38 | 2 UK | 2020-11 | 5 UK-London  | 3 | 5 | 2.181818 | #####    |  |
| 39 | 2 UK | 2020-11 | 5 UK-Norther | 1 | 1 | 1.780091 | #####    |  |
| 40 | 2 UK | 2020-11 | 5 UK-Norther | 1 | 2 | 2.08476  | #####    |  |
| 41 | 2 UK | 2020-11 | 5 UK-Norther | 1 | 3 | 1.573006 | #####    |  |
| 42 | 2 UK | 2020-11 | 5 UK-Norther | 1 | 4 | 1.580913 | #####    |  |
| 43 | 2 UK | 2020-11 | 5 UK-Norther | 1 | 5 | 1.675632 | #####    |  |
| 44 | 2 UK | 2020-11 | 5 UK-Norther | 2 | 1 | 2.155291 | #####    |  |
| 45 | 2 UK | 2020-11 | 5 UK-Norther | 2 | 2 | 3.4      | 1.186672 |  |
| 46 | 2 UK | 2020-11 | 5 UK-Norther | 2 | 3 | 1.375    | #####    |  |
| 47 | 2 UK | 2020-11 | 5 UK-Norther | 2 | 4 | 1.333333 | #####    |  |
| 48 | 2 UK | 2020-11 | 5 UK-Norther | 2 | 5 | 2.181818 | #####    |  |
| 49 | 2 UK | 2020-11 | 5 UK-Norther | 3 | 1 | 1.527942 | #####    |  |
| 50 | 2 UK | 2020-11 | 5 UK-Norther | 3 | 2 | 1.375    | #####    |  |
| 51 | 2 UK | 2020-11 | 5 UK-Norther | 3 | 3 | 1.714286 | #####    |  |
| 52 | 2 UK | 2020-11 | 5 UK-Norther | 3 | 4 | 1.8      | #####    |  |
| 53 | 2 UK | 2020-11 | 5 UK-Norther | 3 | 5 | 1.3      | #####    |  |
| 54 | 2 UK | 2020-11 | 5 UK-Overall | 1 | 1 | 1.766405 | #####    |  |
| 55 | 2 UK | 2020-11 | 5 UK-Overall | 1 | 2 | 1.592187 | #####    |  |
| 56 | 2 UK | 2020-11 | 5 UK-Overall | 1 | 3 | 1.770584 | #####    |  |
| 57 | 2 UK | 2020-11 | 5 UK-Overall | 1 | 4 | 1.750293 | #####    |  |
| 58 | 2 UK | 2020-11 | 5 UK-Overall | 1 | 5 | 2.10968  | #####    |  |
| 59 | 2 UK | 2020-11 | 5 UK-Overall | 1 | 5 | 2.10968  | #####    |  |
| 60 | 2 UK | 2020-11 | 5 UK-Overall | 2 | 1 | 1.857418 | #####    |  |

|    |      |         |              |   |   |          |          |  |
|----|------|---------|--------------|---|---|----------|----------|--|
| 1  |      |         |              |   |   |          |          |  |
| 2  |      |         |              |   |   |          |          |  |
| 3  | 2 UK | 2020-11 | 5 UK-Overall | 2 | 2 | 1.841427 | #####    |  |
| 4  | 2 UK | 2020-11 | 5 UK-Overall | 2 | 3 | 1.731449 | #####    |  |
| 5  | 2 UK | 2020-11 | 5 UK-Overall | 2 | 4 | 1.918205 | #####    |  |
| 6  | 2 UK | 2020-11 | 5 UK-Overall | 2 | 5 | 2.046099 | #####    |  |
| 7  | 2 UK | 2020-11 | 5 UK-Overall | 3 | 1 | 1.694107 | #####    |  |
| 8  | 2 UK | 2020-11 | 5 UK-Overall | 3 | 2 | 1.437045 | #####    |  |
| 9  | 2 UK | 2020-11 | 5 UK-Overall | 3 | 3 | 1.802138 | #####    |  |
| 10 | 2 UK | 2020-11 | 5 UK-Overall | 3 | 4 | 1.593525 | #####    |  |
| 11 | 2 UK | 2020-11 | 5 UK-Overall | 3 | 5 | 2.169521 | #####    |  |
| 12 | 2 UK | 2020-11 | 5 UK-Scotlan | 1 | 1 | 1.951926 | #####    |  |
| 13 | 2 UK | 2020-11 | 5 UK-Scotlan | 1 | 2 | 2.02586  | #####    |  |
| 14 | 2 UK | 2020-11 | 5 UK-Scotlan | 1 | 3 | 2.146105 | #####    |  |
| 15 | 2 UK | 2020-11 | 5 UK-Scotlan | 1 | 4 | 1.705953 | #####    |  |
| 16 | 2 UK | 2020-11 | 5 UK-Scotlan | 1 | 5 | 1.902403 | #####    |  |
| 17 | 2 UK | 2020-11 | 5 UK-Scotlan | 2 | 1 | 2.116113 | #####    |  |
| 18 | 2 UK | 2020-11 | 5 UK-Scotlan | 2 | 2 | 2.52381  | #####    |  |
| 19 | 2 UK | 2020-11 | 5 UK-Scotlan | 2 | 3 | 2.073171 | #####    |  |
| 20 | 2 UK | 2020-11 | 5 UK-Scotlan | 2 | 4 | 1.783333 | #####    |  |
| 21 | 2 UK | 2020-11 | 5 UK-Scotlan | 2 | 5 | 2.171429 | #####    |  |
| 22 | 2 UK | 2020-11 | 5 UK-Scotlan | 3 | 1 | 1.747878 | #####    |  |
| 23 | 2 UK | 2020-11 | 5 UK-Scotlan | 3 | 2 | 1.615385 | #####    |  |
| 24 | 2 UK | 2020-11 | 5 UK-Scotlan | 3 | 3 | 2.25     | #####    |  |
| 25 | 2 UK | 2020-11 | 5 UK-Scotlan | 3 | 4 | 1.592593 | #####    |  |
| 26 | 2 UK | 2020-11 | 5 UK-Scotlan | 3 | 5 | 1.470588 | #####    |  |
| 27 | 2 UK | 2020-11 | 5 UK-Wales   | 1 | 1 | 1.468999 | #####    |  |
| 28 | 2 UK | 2020-11 | 5 UK-Wales   | 1 | 2 | 1.282875 | #####    |  |
| 29 | 2 UK | 2020-11 | 5 UK-Wales   | 1 | 3 | 1.403198 | #####    |  |
| 30 | 2 UK | 2020-11 | 5 UK-Wales   | 1 | 4 | 2.065746 | #####    |  |
| 31 | 2 UK | 2020-11 | 5 UK-Wales   | 1 | 5 | 1.327092 | #####    |  |
| 32 | 2 UK | 2020-11 | 5 UK-Wales   | 2 | 1 | 1.756758 | #####    |  |
| 33 | 2 UK | 2020-11 | 5 UK-Wales   | 2 | 2 | 1.846154 | #####    |  |
| 34 | 2 UK | 2020-11 | 5 UK-Wales   | 2 | 3 | 1.428571 | #####    |  |
| 35 | 2 UK | 2020-11 | 5 UK-Wales   | 2 | 4 | 2.1875   | #####    |  |
| 36 | 2 UK | 2020-11 | 5 UK-Wales   | 2 | 5 | 1.666667 | #####    |  |
| 37 | 2 UK | 2020-11 | 5 UK-Wales   | 3 | 1 | 1.277108 | #####    |  |
| 38 | 2 UK | 2020-11 | 5 UK-Wales   | 3 | 2 | #####    | #####    |  |
| 39 | 2 UK | 2020-11 | 5 UK-Wales   | 3 | 3 | 1.388889 | #####    |  |
| 40 | 2 UK | 2020-11 | 5 UK-Wales   | 3 | 4 | 1.9375   | #####    |  |
| 41 | 2 UK | 2020-11 | 5 UK-Wales   | 3 | 5 | 1.190476 | #####    |  |
| 42 | 2 UK | 2020-12 | 1 UK-Englan  | 1 | 1 | 5.610742 | #####    |  |
| 43 | 2 UK | 2020-12 | 1 UK-Englan  | 1 | 2 | 7.083901 | 1.747582 |  |
| 44 | 2 UK | 2020-12 | 1 UK-Englan  | 1 | 3 | 5.85105  | 1.143275 |  |
| 45 | 2 UK | 2020-12 | 1 UK-Englan  | 1 | 4 | 5.121857 | #####    |  |
| 46 | 2 UK | 2020-12 | 1 UK-Englan  | 1 | 5 | 3.687634 | #####    |  |
| 47 | 2 UK | 2020-12 | 1 UK-Englan  | 2 | 1 | 4.683044 | #####    |  |
| 48 | 2 UK | 2020-12 | 1 UK-Englan  | 2 | 2 | 4.5      | #####    |  |
| 49 | 2 UK | 2020-12 | 1 UK-Englan  | 2 | 3 | 6.136364 | 1.268415 |  |
| 50 | 2 UK | 2020-12 | 1 UK-Englan  | 2 | 4 | 4.230769 | 1.346371 |  |
| 51 | 2 UK | 2020-12 | 1 UK-Englan  | 2 | 5 | 2.863636 | #####    |  |
| 52 | 2 UK | 2020-12 | 1 UK-Englan  | 3 | 1 | 6.12916  | #####    |  |
| 53 | 2 UK | 2020-12 | 1 UK-Englan  | 3 | 2 | 8        | 2.302328 |  |
| 54 | 2 UK | 2020-12 | 1 UK-Englan  | 3 | 3 | 5.6      | 1.834245 |  |
| 55 | 2 UK | 2020-12 | 1 UK-Englan  | 3 | 4 | 5.391304 | 1.015524 |  |
| 56 | 2 UK | 2020-12 | 1 UK-Englan  | 3 | 5 | 4.380952 | #####    |  |
| 57 | 2 UK | 2020-12 | 1 UK-London  | 1 | 1 | 3.551142 | #####    |  |
| 58 | 2 UK | 2020-12 | 1 UK-London  | 1 | 2 | 5.938616 | 2.756669 |  |

|    |      |         |              |   |   |          |          |  |
|----|------|---------|--------------|---|---|----------|----------|--|
| 1  |      |         |              |   |   |          |          |  |
| 2  |      |         |              |   |   |          |          |  |
| 3  | 2 UK | 2020-12 | 1 UK-London  | 1 | 3 | 2.805113 | #####    |  |
| 4  | 2 UK | 2020-12 | 1 UK-London  | 1 | 4 | 4.320529 | #####    |  |
| 5  | 2 UK | 2020-12 | 1 UK-London  | 1 | 5 | 1.982827 | #####    |  |
| 6  | 2 UK | 2020-12 | 1 UK-London  | 2 | 1 | 5.083659 | 1.238624 |  |
| 7  | 2 UK | 2020-12 | 1 UK-London  | 2 | 2 | 9        | 4.176404 |  |
| 8  | 2 UK | 2020-12 | 1 UK-London  | 2 | 3 | 3.857143 | #####    |  |
| 9  | 2 UK | 2020-12 | 1 UK-London  | 2 | 4 | 5        | 1.333423 |  |
| 10 | 2 UK | 2020-12 | 1 UK-London  | 2 | 5 | 2.166667 | #####    |  |
| 11 | 2 UK | 2020-12 | 1 UK-London  | 3 | 1 | 2.662716 | #####    |  |
| 12 | 2 UK | 2020-12 | 1 UK-London  | 3 | 2 | 2        | 0        |  |
| 13 | 2 UK | 2020-12 | 1 UK-London  | 3 | 3 | 2.375    | 1.074455 |  |
| 14 | 2 UK | 2020-12 | 1 UK-London  | 3 | 4 | 4        | 1.311198 |  |
| 15 | 2 UK | 2020-12 | 1 UK-London  | 3 | 5 | 1.8      | #####    |  |
| 16 | 2 UK | 2020-12 | 1 UK-Norther | 1 | 1 | 8.908324 | 2.019627 |  |
| 17 | 2 UK | 2020-12 | 1 UK-Norther | 1 | 2 | 10.19078 | 4.707044 |  |
| 18 | 2 UK | 2020-12 | 1 UK-Norther | 1 | 3 | 11.92207 | 2.805014 |  |
| 19 | 2 UK | 2020-12 | 1 UK-Norther | 1 | 4 | 4.778133 | #####    |  |
| 20 | 2 UK | 2020-12 | 1 UK-Norther | 1 | 5 | 2.338594 | 1.075805 |  |
| 21 | 2 UK | 2020-12 | 1 UK-Norther | 2 | 1 | 5.463808 | 1.120909 |  |
| 22 | 2 UK | 2020-12 | 1 UK-Norther | 2 | 2 | 6        | 0        |  |
| 23 | 2 UK | 2020-12 | 1 UK-Norther | 2 | 3 | 6.333333 | 3.53839  |  |
| 24 | 2 UK | 2020-12 | 1 UK-Norther | 2 | 4 | 5.833333 | 1.706584 |  |
| 25 | 2 UK | 2020-12 | 1 UK-Norther | 2 | 5 | 3        | 1.414309 |  |
| 26 | 2 UK | 2020-12 | 1 UK-Norther | 3 | 1 | 10.68383 | 2.770355 |  |
| 27 | 2 UK | 2020-12 | 1 UK-Norther | 3 | 2 | 12       | 6.36439  |  |
| 28 | 2 UK | 2020-12 | 1 UK-Norther | 3 | 3 | 13.66667 | 3.209001 |  |
| 29 | 2 UK | 2020-12 | 1 UK-Norther | 3 | 4 | 4        | #####    |  |
| 30 | 2 UK | 2020-12 | 1 UK-Norther | 3 | 5 | 1        | 0        |  |
| 31 | 2 UK | 2020-12 | 1 UK-Overall | 1 | 1 | 5.218111 | #####    |  |
| 32 | 2 UK | 2020-12 | 1 UK-Overall | 1 | 2 | 6.986216 | 1.397875 |  |
| 33 | 2 UK | 2020-12 | 1 UK-Overall | 1 | 3 | 5.230122 | #####    |  |
| 34 | 2 UK | 2020-12 | 1 UK-Overall | 1 | 4 | 4.952384 | #####    |  |
| 35 | 2 UK | 2020-12 | 1 UK-Overall | 1 | 5 | 3.234817 | #####    |  |
| 36 | 2 UK | 2020-12 | 1 UK-Overall | 2 | 1 | 4.847605 | #####    |  |
| 37 | 2 UK | 2020-12 | 1 UK-Overall | 2 | 2 | 6.163439 | 1.351537 |  |
| 38 | 2 UK | 2020-12 | 1 UK-Overall | 2 | 3 | 5.617938 | #####    |  |
| 39 | 2 UK | 2020-12 | 1 UK-Overall | 2 | 4 | 4.505373 | #####    |  |
| 40 | 2 UK | 2020-12 | 1 UK-Overall | 2 | 5 | 2.711946 | #####    |  |
| 41 | 2 UK | 2020-12 | 1 UK-Overall | 3 | 1 | 5.431553 | #####    |  |
| 42 | 2 UK | 2020-12 | 1 UK-Overall | 3 | 2 | 7.355551 | 1.920143 |  |
| 43 | 2 UK | 2020-12 | 1 UK-Overall | 3 | 3 | 4.979497 | 1.051156 |  |
| 44 | 2 UK | 2020-12 | 1 UK-Overall | 3 | 4 | 5.145303 | #####    |  |
| 45 | 2 UK | 2020-12 | 1 UK-Overall | 3 | 5 | 3.682469 | #####    |  |
| 46 | 2 UK | 2020-12 | 1 UK-Scotlan | 1 | 1 | 5.098704 | #####    |  |
| 47 | 2 UK | 2020-12 | 1 UK-Scotlan | 1 | 2 | 5.756203 | 2.53397  |  |
| 48 | 2 UK | 2020-12 | 1 UK-Scotlan | 1 | 3 | 5.920871 | 1.265194 |  |
| 49 | 2 UK | 2020-12 | 1 UK-Scotlan | 1 | 4 | 4.728235 | #####    |  |
| 50 | 2 UK | 2020-12 | 1 UK-Scotlan | 1 | 5 | 2.357809 | #####    |  |
| 51 | 2 UK | 2020-12 | 1 UK-Scotlan | 2 | 1 | 6.025453 | 1.217165 |  |
| 52 | 2 UK | 2020-12 | 1 UK-Scotlan | 2 | 2 | 20       | 0        |  |
| 53 | 2 UK | 2020-12 | 1 UK-Scotlan | 2 | 3 | 6.285714 | 1.685672 |  |
| 54 | 2 UK | 2020-12 | 1 UK-Scotlan | 2 | 4 | 4.846154 | 1.522504 |  |
| 55 | 2 UK | 2020-12 | 1 UK-Scotlan | 2 | 5 | 3        | #####    |  |
| 56 | 2 UK | 2020-12 | 1 UK-Scotlan | 3 | 1 | 4.588729 | #####    |  |
| 57 | 2 UK | 2020-12 | 1 UK-Scotlan | 3 | 2 | 3.333333 | #####    |  |
| 58 | 2 UK | 2020-12 | 1 UK-Scotlan | 3 | 3 | 5.727273 | 1.715823 |  |

1  
2  
3  
4  
5  
6  
7  
8  
9  
10  
11  
12  
13  
14  
15  
16  
17  
18  
19  
20  
21  
22  
23  
24  
25  
26  
27  
28  
29  
30  
31  
32  
33  
34  
35  
36  
37  
38  
39  
40  
41  
42  
43  
44  
45  
46  
47  
48  
49  
50  
51  
52  
53  
54  
55  
56  
57  
58  
59  
60

|      |         |              |   |   |          |          |
|------|---------|--------------|---|---|----------|----------|
| 2 UK | 2020-12 | 1 UK-Scotlan | 3 | 4 | 4.636364 | #####    |
| 2 UK | 2020-12 | 1 UK-Scotlan | 3 | 5 | 1.857143 | #####    |
| 2 UK | 2020-12 | 1 UK-Wales   | 1 | 1 | 4.728371 | 1.055754 |
| 2 UK | 2020-12 | 1 UK-Wales   | 1 | 2 | 6.5      | 3.182195 |
| 2 UK | 2020-12 | 1 UK-Wales   | 1 | 3 | 5.794722 | 3.61819  |
| 2 UK | 2020-12 | 1 UK-Wales   | 1 | 4 | 5.627611 | 1.296515 |
| 2 UK | 2020-12 | 1 UK-Wales   | 1 | 5 | 2.410787 | #####    |
| 2 UK | 2020-12 | 1 UK-Wales   | 2 | 1 | 3.745078 | #####    |
| 2 UK | 2020-12 | 1 UK-Wales   | 2 | 2 | 6.5      | 3.182195 |
| 2 UK | 2020-12 | 1 UK-Wales   | 2 | 3 | 3.8      | #####    |
| 2 UK | 2020-12 | 1 UK-Wales   | 2 | 4 | 3.85     | #####    |
| 2 UK | 2020-12 | 1 UK-Wales   | 2 | 5 | 2        | #####    |
| 2 UK | 2020-12 | 1 UK-Wales   | 3 | 1 | 5.654502 | 1.930885 |
| 2 UK | 2020-12 | 1 UK-Wales   | 3 | 3 | 7        | 5.715861 |
| 2 UK | 2020-12 | 1 UK-Wales   | 3 | 4 | 7.5      | 2.462888 |
| 2 UK | 2020-12 | 1 UK-Wales   | 3 | 5 | 2.7      | #####    |
| 2 UK | 2020-12 | 2 UK-Englan  | 1 | 1 | 1.813513 | #####    |
| 2 UK | 2020-12 | 2 UK-Englan  | 1 | 2 | 2.182537 | #####    |
| 2 UK | 2020-12 | 2 UK-Englan  | 1 | 3 | 1.897632 | #####    |
| 2 UK | 2020-12 | 2 UK-Englan  | 1 | 4 | 1.749141 | #####    |
| 2 UK | 2020-12 | 2 UK-Englan  | 1 | 5 | 1.2423   | #####    |
| 2 UK | 2020-12 | 2 UK-Englan  | 2 | 1 | 1.626786 | #####    |
| 2 UK | 2020-12 | 2 UK-Englan  | 2 | 2 | 1.363636 | #####    |
| 2 UK | 2020-12 | 2 UK-Englan  | 2 | 3 | 2.038462 | #####    |
| 2 UK | 2020-12 | 2 UK-Englan  | 2 | 4 | 1.7      | #####    |
| 2 UK | 2020-12 | 2 UK-Englan  | 2 | 5 | 1.166667 | #####    |
| 2 UK | 2020-12 | 2 UK-Englan  | 3 | 1 | 1.914824 | #####    |
| 2 UK | 2020-12 | 2 UK-Englan  | 3 | 2 | 2.545455 | #####    |
| 2 UK | 2020-12 | 2 UK-Englan  | 3 | 3 | 1.8      | #####    |
| 2 UK | 2020-12 | 2 UK-Englan  | 3 | 4 | 1.766667 | #####    |
| 2 UK | 2020-12 | 2 UK-Englan  | 3 | 5 | 1.296296 | #####    |
| 2 UK | 2020-12 | 2 UK-London  | 1 | 1 | 1.432521 | #####    |
| 2 UK | 2020-12 | 2 UK-London  | 1 | 2 | 2.413065 | #####    |
| 2 UK | 2020-12 | 2 UK-London  | 1 | 3 | 1.354509 | #####    |
| 2 UK | 2020-12 | 2 UK-London  | 1 | 4 | 1.260512 | #####    |
| 2 UK | 2020-12 | 2 UK-London  | 1 | 5 | #####    | #####    |
| 2 UK | 2020-12 | 2 UK-London  | 2 | 1 | 1.826605 | #####    |
| 2 UK | 2020-12 | 2 UK-London  | 2 | 2 | 2.166667 | #####    |
| 2 UK | 2020-12 | 2 UK-London  | 2 | 3 | 2        | #####    |
| 2 UK | 2020-12 | 2 UK-London  | 2 | 4 | 1.75     | #####    |
| 2 UK | 2020-12 | 2 UK-London  | 2 | 5 | #####    | #####    |
| 2 UK | 2020-12 | 2 UK-London  | 3 | 1 | 1.237927 | #####    |
| 2 UK | 2020-12 | 2 UK-London  | 3 | 2 | 2.666667 | #####    |
| 2 UK | 2020-12 | 2 UK-London  | 3 | 3 | 1.133333 | #####    |
| 2 UK | 2020-12 | 2 UK-London  | 3 | 4 | 1        | #####    |
| 2 UK | 2020-12 | 2 UK-London  | 3 | 5 | #####    | #####    |
| 2 UK | 2020-12 | 2 UK-Norther | 1 | 1 | 2.389149 | #####    |
| 2 UK | 2020-12 | 2 UK-Norther | 1 | 2 | 2.741163 | #####    |
| 2 UK | 2020-12 | 2 UK-Norther | 1 | 3 | 2.333333 | #####    |
| 2 UK | 2020-12 | 2 UK-Norther | 1 | 4 | 2.218671 | #####    |
| 2 UK | 2020-12 | 2 UK-Norther | 1 | 5 | 1.561693 | #####    |
| 2 UK | 2020-12 | 2 UK-Norther | 2 | 1 | 2.591466 | #####    |
| 2 UK | 2020-12 | 2 UK-Norther | 2 | 2 | 3        | 0        |
| 2 UK | 2020-12 | 2 UK-Norther | 2 | 3 | 2.333333 | #####    |
| 2 UK | 2020-12 | 2 UK-Norther | 2 | 4 | 2.6      | #####    |
| 2 UK | 2020-12 | 2 UK-Norther | 2 | 5 | 2.333333 | #####    |

|    |      |         |              |   |   |          |       |  |
|----|------|---------|--------------|---|---|----------|-------|--|
| 1  |      |         |              |   |   |          |       |  |
| 2  |      |         |              |   |   |          |       |  |
| 3  | 2 UK | 2020-12 | 2 UK-Norther | 3 | 1 | 2.283754 | ##### |  |
| 4  | 2 UK | 2020-12 | 2 UK-Norther | 3 | 2 | 2.666667 | ##### |  |
| 5  | 2 UK | 2020-12 | 2 UK-Norther | 3 | 3 | 2.333333 | ##### |  |
| 6  | 2 UK | 2020-12 | 2 UK-Norther | 3 | 4 | 1.75     | ##### |  |
| 7  | 2 UK | 2020-12 | 2 UK-Norther | 3 | 5 | 0        | 0     |  |
| 8  | 2 UK | 2020-12 | 2 UK-Overall | 1 | 1 | 1.704664 | ##### |  |
| 9  | 2 UK | 2020-12 | 2 UK-Overall | 1 | 2 | 2.193222 | ##### |  |
| 10 | 2 UK | 2020-12 | 2 UK-Overall | 1 | 3 | 1.666578 | ##### |  |
| 11 | 2 UK | 2020-12 | 2 UK-Overall | 1 | 4 | 1.689415 | ##### |  |
| 12 | 2 UK | 2020-12 | 2 UK-Overall | 1 | 5 | 1.139314 | ##### |  |
| 13 | 2 UK | 2020-12 | 2 UK-Overall | 2 | 1 | 1.739158 | ##### |  |
| 14 | 2 UK | 2020-12 | 2 UK-Overall | 2 | 2 | 1.642144 | ##### |  |
| 15 | 2 UK | 2020-12 | 2 UK-Overall | 2 | 3 | 2.069005 | ##### |  |
| 16 | 2 UK | 2020-12 | 2 UK-Overall | 2 | 4 | 1.794217 | ##### |  |
| 17 | 2 UK | 2020-12 | 2 UK-Overall | 2 | 5 | 1.162982 | ##### |  |
| 18 | 2 UK | 2020-12 | 2 UK-Overall | 3 | 1 | 1.685796 | ##### |  |
| 19 | 2 UK | 2020-12 | 2 UK-Overall | 3 | 2 | 2.47127  | ##### |  |
| 20 | 2 UK | 2020-12 | 2 UK-Overall | 3 | 3 | 1.454524 | ##### |  |
| 21 | 2 UK | 2020-12 | 2 UK-Overall | 3 | 4 | 1.638685 | ##### |  |
| 22 | 2 UK | 2020-12 | 2 UK-Overall | 3 | 5 | 1.121052 | ##### |  |
| 23 | 2 UK | 2020-12 | 2 UK-Scotlan | 1 | 1 | 1.529652 | ##### |  |
| 24 | 2 UK | 2020-12 | 2 UK-Scotlan | 1 | 2 | 1.598906 | ##### |  |
| 25 | 2 UK | 2020-12 | 2 UK-Scotlan | 1 | 3 | 1.529804 | ##### |  |
| 26 | 2 UK | 2020-12 | 2 UK-Scotlan | 1 | 4 | 1.721911 | ##### |  |
| 27 | 2 UK | 2020-12 | 2 UK-Scotlan | 1 | 5 | 1.0256   | ##### |  |
| 28 | 2 UK | 2020-12 | 2 UK-Scotlan | 2 | 1 | 1.881105 | ##### |  |
| 29 | 2 UK | 2020-12 | 2 UK-Scotlan | 2 | 2 | 1.333333 | ##### |  |
| 30 | 2 UK | 2020-12 | 2 UK-Scotlan | 2 | 3 | 2.294118 | ##### |  |
| 31 | 2 UK | 2020-12 | 2 UK-Scotlan | 2 | 4 | 1.777778 | ##### |  |
| 32 | 2 UK | 2020-12 | 2 UK-Scotlan | 2 | 5 | 1.375    | ##### |  |
| 33 | 2 UK | 2020-12 | 2 UK-Scotlan | 3 | 1 | 1.333162 | ##### |  |
| 34 | 2 UK | 2020-12 | 2 UK-Scotlan | 3 | 2 | 1.666667 | ##### |  |
| 35 | 2 UK | 2020-12 | 2 UK-Scotlan | 3 | 3 | 1.142857 | ##### |  |
| 36 | 2 UK | 2020-12 | 2 UK-Scotlan | 3 | 4 | 1.666667 | ##### |  |
| 37 | 2 UK | 2020-12 | 2 UK-Scotlan | 3 | 5 | #####    | ##### |  |
| 38 | 2 UK | 2020-12 | 2 UK-Wales   | 1 | 1 | 1.561881 | ##### |  |
| 39 | 2 UK | 2020-12 | 2 UK-Wales   | 1 | 2 | 2.333333 | ##### |  |
| 40 | 2 UK | 2020-12 | 2 UK-Wales   | 1 | 3 | 1.380475 | ##### |  |
| 41 | 2 UK | 2020-12 | 2 UK-Wales   | 1 | 4 | 1.997916 | ##### |  |
| 42 | 2 UK | 2020-12 | 2 UK-Wales   | 1 | 5 | #####    | ##### |  |
| 43 | 2 UK | 2020-12 | 2 UK-Wales   | 2 | 1 | 1.894927 | ##### |  |
| 44 | 2 UK | 2020-12 | 2 UK-Wales   | 2 | 2 | 2.333333 | ##### |  |
| 45 | 2 UK | 2020-12 | 2 UK-Wales   | 2 | 3 | 2.25     | ##### |  |
| 46 | 2 UK | 2020-12 | 2 UK-Wales   | 2 | 4 | 1.909091 | ##### |  |
| 47 | 2 UK | 2020-12 | 2 UK-Wales   | 2 | 5 | 1.181818 | ##### |  |
| 48 | 2 UK | 2020-12 | 2 UK-Wales   | 3 | 1 | 1.245195 | ##### |  |
| 49 | 2 UK | 2020-12 | 2 UK-Wales   | 3 | 3 | 0.75     | ##### |  |
| 50 | 2 UK | 2020-12 | 2 UK-Wales   | 3 | 4 | 2.071429 | ##### |  |
| 51 | 2 UK | 2020-12 | 2 UK-Wales   | 3 | 5 | 0.6      | ##### |  |
| 52 | 2 UK | 2020-12 | 3 UK-Englan  | 1 | 1 | 0        | 0     |  |
| 53 | 2 UK | 2020-12 | 3 UK-Englan  | 1 | 2 | 0        | 0     |  |
| 54 | 2 UK | 2020-12 | 3 UK-Englan  | 1 | 3 | 0        | 0     |  |
| 55 | 2 UK | 2020-12 | 3 UK-Englan  | 1 | 4 | 0        | 0     |  |
| 56 | 2 UK | 2020-12 | 3 UK-Englan  | 1 | 5 | 0        | 0     |  |
| 57 | 2 UK | 2020-12 | 3 UK-Englan  | 2 | 1 | 0        | 0     |  |
| 58 | 2 UK | 2020-12 | 3 UK-Englan  | 2 | 2 | 0        | 0     |  |
| 59 | 2 UK | 2020-12 | 3 UK-Englan  | 2 | 3 | 0        | 0     |  |
| 60 | 2 UK | 2020-12 | 3 UK-Englan  | 2 | 4 | 0        | 0     |  |

|    |      |         |               |   |   |   |   |
|----|------|---------|---------------|---|---|---|---|
| 1  |      |         |               |   |   |   |   |
| 2  |      |         |               |   |   |   |   |
| 3  | 2 UK | 2020-12 | 3 UK-England  | 2 | 3 | 0 | 0 |
| 4  | 2 UK | 2020-12 | 3 UK-England  | 2 | 4 | 0 | 0 |
| 5  | 2 UK | 2020-12 | 3 UK-England  | 2 | 5 | 0 | 0 |
| 6  | 2 UK | 2020-12 | 3 UK-England  | 3 | 1 | 0 | 0 |
| 7  | 2 UK | 2020-12 | 3 UK-England  | 3 | 2 | 0 | 0 |
| 8  | 2 UK | 2020-12 | 3 UK-England  | 3 | 3 | 0 | 0 |
| 9  | 2 UK | 2020-12 | 3 UK-England  | 3 | 4 | 0 | 0 |
| 10 | 2 UK | 2020-12 | 3 UK-England  | 3 | 5 | 0 | 0 |
| 11 | 2 UK | 2020-12 | 3 UK-London   | 1 | 1 | 0 | 0 |
| 12 | 2 UK | 2020-12 | 3 UK-London   | 1 | 2 | 0 | 0 |
| 13 | 2 UK | 2020-12 | 3 UK-London   | 1 | 3 | 0 | 0 |
| 14 | 2 UK | 2020-12 | 3 UK-London   | 1 | 4 | 0 | 0 |
| 15 | 2 UK | 2020-12 | 3 UK-London   | 1 | 5 | 0 | 0 |
| 16 | 2 UK | 2020-12 | 3 UK-London   | 2 | 1 | 0 | 0 |
| 17 | 2 UK | 2020-12 | 3 UK-London   | 2 | 2 | 0 | 0 |
| 18 | 2 UK | 2020-12 | 3 UK-London   | 2 | 3 | 0 | 0 |
| 19 | 2 UK | 2020-12 | 3 UK-London   | 2 | 4 | 0 | 0 |
| 20 | 2 UK | 2020-12 | 3 UK-London   | 2 | 5 | 0 | 0 |
| 21 | 2 UK | 2020-12 | 3 UK-London   | 3 | 1 | 0 | 0 |
| 22 | 2 UK | 2020-12 | 3 UK-London   | 3 | 2 | 0 | 0 |
| 23 | 2 UK | 2020-12 | 3 UK-London   | 3 | 3 | 0 | 0 |
| 24 | 2 UK | 2020-12 | 3 UK-London   | 3 | 4 | 0 | 0 |
| 25 | 2 UK | 2020-12 | 3 UK-London   | 3 | 5 | 0 | 0 |
| 26 | 2 UK | 2020-12 | 3 UK-London   | 3 | 5 | 0 | 0 |
| 27 | 2 UK | 2020-12 | 3 UK-Norther  | 1 | 1 | 0 | 0 |
| 28 | 2 UK | 2020-12 | 3 UK-Norther  | 1 | 2 | 0 | 0 |
| 29 | 2 UK | 2020-12 | 3 UK-Norther  | 1 | 3 | 0 | 0 |
| 30 | 2 UK | 2020-12 | 3 UK-Norther  | 1 | 4 | 0 | 0 |
| 31 | 2 UK | 2020-12 | 3 UK-Norther  | 1 | 5 | 0 | 0 |
| 32 | 2 UK | 2020-12 | 3 UK-Norther  | 2 | 1 | 0 | 0 |
| 33 | 2 UK | 2020-12 | 3 UK-Norther  | 2 | 2 | 0 | 0 |
| 34 | 2 UK | 2020-12 | 3 UK-Norther  | 2 | 3 | 0 | 0 |
| 35 | 2 UK | 2020-12 | 3 UK-Norther  | 2 | 4 | 0 | 0 |
| 36 | 2 UK | 2020-12 | 3 UK-Norther  | 2 | 5 | 0 | 0 |
| 37 | 2 UK | 2020-12 | 3 UK-Norther  | 3 | 1 | 0 | 0 |
| 38 | 2 UK | 2020-12 | 3 UK-Norther  | 3 | 2 | 0 | 0 |
| 39 | 2 UK | 2020-12 | 3 UK-Norther  | 3 | 3 | 0 | 0 |
| 40 | 2 UK | 2020-12 | 3 UK-Norther  | 3 | 4 | 0 | 0 |
| 41 | 2 UK | 2020-12 | 3 UK-Norther  | 3 | 5 | 0 | 0 |
| 42 | 2 UK | 2020-12 | 3 UK-Overall  | 1 | 1 | 0 | 0 |
| 43 | 2 UK | 2020-12 | 3 UK-Overall  | 1 | 2 | 0 | 0 |
| 44 | 2 UK | 2020-12 | 3 UK-Overall  | 1 | 3 | 0 | 0 |
| 45 | 2 UK | 2020-12 | 3 UK-Overall  | 1 | 4 | 0 | 0 |
| 46 | 2 UK | 2020-12 | 3 UK-Overall  | 1 | 5 | 0 | 0 |
| 47 | 2 UK | 2020-12 | 3 UK-Overall  | 2 | 1 | 0 | 0 |
| 48 | 2 UK | 2020-12 | 3 UK-Overall  | 2 | 2 | 0 | 0 |
| 49 | 2 UK | 2020-12 | 3 UK-Overall  | 2 | 3 | 0 | 0 |
| 50 | 2 UK | 2020-12 | 3 UK-Overall  | 2 | 4 | 0 | 0 |
| 51 | 2 UK | 2020-12 | 3 UK-Overall  | 2 | 5 | 0 | 0 |
| 52 | 2 UK | 2020-12 | 3 UK-Overall  | 3 | 1 | 0 | 0 |
| 53 | 2 UK | 2020-12 | 3 UK-Overall  | 3 | 2 | 0 | 0 |
| 54 | 2 UK | 2020-12 | 3 UK-Overall  | 3 | 3 | 0 | 0 |
| 55 | 2 UK | 2020-12 | 3 UK-Overall  | 3 | 4 | 0 | 0 |
| 56 | 2 UK | 2020-12 | 3 UK-Overall  | 3 | 5 | 0 | 0 |
| 57 | 2 UK | 2020-12 | 3 UK-Scotland | 1 | 1 | 0 | 0 |
| 58 | 2 UK | 2020-12 | 3 UK-Scotland | 1 | 2 | 0 | 0 |
| 59 | 2 UK | 2020-12 | 3 UK-Scotland | 1 | 3 | 0 | 0 |
| 60 | 2 UK | 2020-12 | 3 UK-Scotland | 1 | 3 | 0 | 0 |



|    |      |         |              |   |   |          |          |  |
|----|------|---------|--------------|---|---|----------|----------|--|
| 1  |      |         |              |   |   |          |          |  |
| 2  |      |         |              |   |   |          |          |  |
| 3  | 2 UK | 2020-12 | 3 UK-Scotlan | 1 | 4 | 0        | 0        |  |
| 4  | 2 UK | 2020-12 | 3 UK-Scotlan | 1 | 5 | 0        | 0        |  |
| 5  | 2 UK | 2020-12 | 3 UK-Scotlan | 2 | 1 | 0        | 0        |  |
| 6  | 2 UK | 2020-12 | 3 UK-Scotlan | 2 | 2 | 0        | 0        |  |
| 7  | 2 UK | 2020-12 | 3 UK-Scotlan | 2 | 3 | 0        | 0        |  |
| 8  | 2 UK | 2020-12 | 3 UK-Scotlan | 2 | 4 | 0        | 0        |  |
| 9  | 2 UK | 2020-12 | 3 UK-Scotlan | 2 | 5 | 0        | 0        |  |
| 10 | 2 UK | 2020-12 | 3 UK-Scotlan | 3 | 1 | 0        | 0        |  |
| 11 | 2 UK | 2020-12 | 3 UK-Scotlan | 3 | 2 | 0        | 0        |  |
| 12 | 2 UK | 2020-12 | 3 UK-Scotlan | 3 | 3 | 0        | 0        |  |
| 13 | 2 UK | 2020-12 | 3 UK-Scotlan | 3 | 4 | 0        | 0        |  |
| 14 | 2 UK | 2020-12 | 3 UK-Scotlan | 3 | 5 | 0        | 0        |  |
| 15 | 2 UK | 2020-12 | 3 UK-Wales   | 1 | 1 | 0        | 0        |  |
| 16 | 2 UK | 2020-12 | 3 UK-Wales   | 1 | 2 | 0        | 0        |  |
| 17 | 2 UK | 2020-12 | 3 UK-Wales   | 1 | 3 | 0        | 0        |  |
| 18 | 2 UK | 2020-12 | 3 UK-Wales   | 1 | 4 | 0        | 0        |  |
| 19 | 2 UK | 2020-12 | 3 UK-Wales   | 1 | 5 | 0        | 0        |  |
| 20 | 2 UK | 2020-12 | 3 UK-Wales   | 2 | 1 | 0        | 0        |  |
| 21 | 2 UK | 2020-12 | 3 UK-Wales   | 2 | 2 | 0        | 0        |  |
| 22 | 2 UK | 2020-12 | 3 UK-Wales   | 2 | 3 | 0        | 0        |  |
| 23 | 2 UK | 2020-12 | 3 UK-Wales   | 2 | 4 | 0        | 0        |  |
| 24 | 2 UK | 2020-12 | 3 UK-Wales   | 2 | 5 | 0        | 0        |  |
| 25 | 2 UK | 2020-12 | 3 UK-Wales   | 3 | 1 | 0        | 0        |  |
| 26 | 2 UK | 2020-12 | 3 UK-Wales   | 3 | 3 | 0        | 0        |  |
| 27 | 2 UK | 2020-12 | 3 UK-Wales   | 3 | 4 | 0        | 0        |  |
| 28 | 2 UK | 2020-12 | 3 UK-Wales   | 3 | 5 | 0        | 0        |  |
| 29 | 2 UK | 2020-12 | 4 UK-Englan  | 1 | 1 | 2.602098 | #####    |  |
| 30 | 2 UK | 2020-12 | 4 UK-Englan  | 1 | 2 | 3.222947 | 1.418446 |  |
| 31 | 2 UK | 2020-12 | 4 UK-Englan  | 1 | 3 | 2.786248 | #####    |  |
| 32 | 2 UK | 2020-12 | 4 UK-Englan  | 1 | 4 | 3.141649 | #####    |  |
| 33 | 2 UK | 2020-12 | 4 UK-Englan  | 1 | 5 | #####    | #####    |  |
| 34 | 2 UK | 2020-12 | 4 UK-Englan  | 2 | 1 | 2.110317 | #####    |  |
| 35 | 2 UK | 2020-12 | 4 UK-Englan  | 2 | 2 | 3.2      | 1.927823 |  |
| 36 | 2 UK | 2020-12 | 4 UK-Englan  | 2 | 3 | 3.035714 | 1.174294 |  |
| 37 | 2 UK | 2020-12 | 4 UK-Englan  | 2 | 4 | 1.478261 | #####    |  |
| 38 | 2 UK | 2020-12 | 4 UK-Englan  | 2 | 5 | 0        | 0        |  |
| 39 | 2 UK | 2020-12 | 4 UK-Englan  | 3 | 1 | 2.855402 | #####    |  |
| 40 | 2 UK | 2020-12 | 4 UK-Englan  | 3 | 2 | 3.230769 | 1.784848 |  |
| 41 | 2 UK | 2020-12 | 4 UK-Englan  | 3 | 3 | 2.6      | 1.381879 |  |
| 42 | 2 UK | 2020-12 | 4 UK-Englan  | 3 | 4 | 3.78125  | 1.262318 |  |
| 43 | 2 UK | 2020-12 | 4 UK-Englan  | 3 | 5 | 1.333333 | #####    |  |
| 44 | 2 UK | 2020-12 | 4 UK-London  | 1 | 1 | 2.527593 | #####    |  |
| 45 | 2 UK | 2020-12 | 4 UK-London  | 1 | 2 | 2.030768 | 1.466555 |  |
| 46 | 2 UK | 2020-12 | 4 UK-London  | 1 | 3 | 3.362788 | 1.484361 |  |
| 47 | 2 UK | 2020-12 | 4 UK-London  | 1 | 4 | 1.867802 | #####    |  |
| 48 | 2 UK | 2020-12 | 4 UK-London  | 1 | 5 | 0        | 0        |  |
| 49 | 2 UK | 2020-12 | 4 UK-London  | 2 | 1 | 1.434163 | #####    |  |
| 50 | 2 UK | 2020-12 | 4 UK-London  | 2 | 2 | 4.285714 | 2.753397 |  |
| 51 | 2 UK | 2020-12 | 4 UK-London  | 2 | 3 | 0        | 0        |  |
| 52 | 2 UK | 2020-12 | 4 UK-London  | 2 | 4 | 1.8      | #####    |  |
| 53 | 2 UK | 2020-12 | 4 UK-London  | 2 | 5 | 0        | 0        |  |
| 54 | 2 UK | 2020-12 | 4 UK-London  | 3 | 1 | 3.141378 | 1.264216 |  |
| 55 | 2 UK | 2020-12 | 4 UK-London  | 3 | 2 | 0        | 0        |  |
| 56 | 2 UK | 2020-12 | 4 UK-London  | 3 | 3 | 4.692308 | 1.998313 |  |
| 57 | 2 UK | 2020-12 | 4 UK-London  | 3 | 4 | 1.916667 | 1.003245 |  |
| 58 | 2 UK | 2020-12 | 4 UK-London  | 3 | 5 | 0        | 0        |  |
| 59 | 2 UK | 2020-12 | 4 UK-London  | 3 | 5 | 0        | 0        |  |
| 60 | 2 UK | 2020-12 | 4 UK-London  | 3 | 5 | 0        | 0        |  |

|    |      |         |              |   |   |          |          |
|----|------|---------|--------------|---|---|----------|----------|
| 1  |      |         |              |   |   |          |          |
| 2  |      |         |              |   |   |          |          |
| 3  | 2 UK | 2020-12 | 4 UK-Norther | 1 | 1 | 4.34044  | 1.618164 |
| 4  | 2 UK | 2020-12 | 4 UK-Norther | 1 | 2 | 4.400236 | 3.768209 |
| 5  | 2 UK | 2020-12 | 4 UK-Norther | 1 | 3 | 5.57933  | 2.69988  |
| 6  | 2 UK | 2020-12 | 4 UK-Norther | 1 | 4 | 3.491678 | 1.785866 |
| 7  | 2 UK | 2020-12 | 4 UK-Norther | 1 | 5 | 0        | 0        |
| 8  | 2 UK | 2020-12 | 4 UK-Norther | 2 | 1 | 1.442288 | #####    |
| 9  | 2 UK | 2020-12 | 4 UK-Norther | 2 | 2 | 0        | 0        |
| 10 | 2 UK | 2020-12 | 4 UK-Norther | 2 | 3 | 3.333333 | 2.721839 |
| 11 | 2 UK | 2020-12 | 4 UK-Norther | 2 | 4 | 1.818182 | 1.225287 |
| 12 | 2 UK | 2020-12 | 4 UK-Norther | 2 | 5 | 0        | 0        |
| 13 | 2 UK | 2020-12 | 4 UK-Norther | 3 | 1 | 5.521008 | 2.173935 |
| 14 | 2 UK | 2020-12 | 4 UK-Norther | 3 | 2 | 5.666667 | 4.627126 |
| 15 | 2 UK | 2020-12 | 4 UK-Norther | 3 | 3 | 6        | 3.149816 |
| 16 | 2 UK | 2020-12 | 4 UK-Norther | 3 | 4 | 5        | 3.118258 |
| 17 | 2 UK | 2020-12 | 4 UK-Norther | 3 | 5 | 0        | 0        |
| 18 | 2 UK | 2020-12 | 4 UK-Overall | 1 | 1 | 2.675698 | #####    |
| 19 | 2 UK | 2020-12 | 4 UK-Overall | 1 | 2 | 3.082947 | 1.053367 |
| 20 | 2 UK | 2020-12 | 4 UK-Overall | 1 | 3 | 3.251734 | #####    |
| 21 | 2 UK | 2020-12 | 4 UK-Overall | 1 | 4 | 2.788474 | #####    |
| 22 | 2 UK | 2020-12 | 4 UK-Overall | 1 | 5 | #####    | #####    |
| 23 | 2 UK | 2020-12 | 4 UK-Overall | 2 | 1 | 1.964585 | #####    |
| 24 | 2 UK | 2020-12 | 4 UK-Overall | 2 | 2 | 3.258746 | 1.339782 |
| 25 | 2 UK | 2020-12 | 4 UK-Overall | 2 | 3 | 2.278369 | #####    |
| 26 | 2 UK | 2020-12 | 4 UK-Overall | 2 | 4 | 1.866098 | #####    |
| 27 | 2 UK | 2020-12 | 4 UK-Overall | 2 | 5 | #####    | #####    |
| 28 | 2 UK | 2020-12 | 4 UK-Overall | 3 | 1 | 3.06851  | #####    |
| 29 | 2 UK | 2020-12 | 4 UK-Overall | 3 | 2 | 3.004774 | 1.40012  |
| 30 | 2 UK | 2020-12 | 4 UK-Overall | 3 | 3 | 3.819103 | 1.010526 |
| 31 | 2 UK | 2020-12 | 4 UK-Overall | 3 | 4 | 3.278057 | #####    |
| 32 | 2 UK | 2020-12 | 4 UK-Overall | 3 | 5 | 1.026439 | #####    |
| 33 | 2 UK | 2020-12 | 4 UK-Scotlan | 1 | 1 | 3.024065 | #####    |
| 34 | 2 UK | 2020-12 | 4 UK-Scotlan | 1 | 2 | 3.927527 | 2.709785 |
| 35 | 2 UK | 2020-12 | 4 UK-Scotlan | 1 | 3 | 3.510464 | #####    |
| 36 | 2 UK | 2020-12 | 4 UK-Scotlan | 1 | 4 | 2.799984 | #####    |
| 37 | 2 UK | 2020-12 | 4 UK-Scotlan | 1 | 5 | #####    | #####    |
| 38 | 2 UK | 2020-12 | 4 UK-Scotlan | 2 | 1 | 3.294443 | #####    |
| 39 | 2 UK | 2020-12 | 4 UK-Scotlan | 2 | 2 | 3.75     | 3.247814 |
| 40 | 2 UK | 2020-12 | 4 UK-Scotlan | 2 | 3 | 3.526316 | 1.424786 |
| 41 | 2 UK | 2020-12 | 4 UK-Scotlan | 2 | 4 | 4.15     | 1.402369 |
| 42 | 2 UK | 2020-12 | 4 UK-Scotlan | 2 | 5 | 0.125    | #####    |
| 43 | 2 UK | 2020-12 | 4 UK-Scotlan | 3 | 1 | 2.829734 | 1.1213   |
| 44 | 2 UK | 2020-12 | 4 UK-Scotlan | 3 | 2 | 4        | 3.57795  |
| 45 | 2 UK | 2020-12 | 4 UK-Scotlan | 3 | 3 | 3.5      | 1.330816 |
| 46 | 2 UK | 2020-12 | 4 UK-Scotlan | 3 | 4 | 1.181818 | #####    |
| 47 | 2 UK | 2020-12 | 4 UK-Scotlan | 3 | 5 | 0        | 0        |
| 48 | 2 UK | 2020-12 | 4 UK-Wales   | 1 | 1 | 2.424875 | 1.025542 |
| 49 | 2 UK | 2020-12 | 4 UK-Wales   | 1 | 2 | 1        | #####    |
| 50 | 2 UK | 2020-12 | 4 UK-Wales   | 1 | 3 | 6.229189 | 3.385481 |
| 51 | 2 UK | 2020-12 | 4 UK-Wales   | 1 | 4 | 1.881351 | #####    |
| 52 | 2 UK | 2020-12 | 4 UK-Wales   | 1 | 5 | #####    | #####    |
| 53 | 2 UK | 2020-12 | 4 UK-Wales   | 2 | 1 | #####    | #####    |
| 54 | 2 UK | 2020-12 | 4 UK-Wales   | 2 | 2 | 1        | #####    |
| 55 | 2 UK | 2020-12 | 4 UK-Wales   | 2 | 3 | #####    | #####    |
| 56 | 2 UK | 2020-12 | 4 UK-Wales   | 2 | 4 | #####    | #####    |
| 57 | 2 UK | 2020-12 | 4 UK-Wales   | 2 | 5 | 0        | 0        |
| 58 | 2 UK | 2020-12 | 4 UK-Wales   | 3 | 1 | 4.186264 | 1.828423 |
| 59 | 2 UK | 2020-12 | 4 UK-Wales   | 3 |   |          |          |
| 60 | 2 UK | 2020-12 | 4 UK-Wales   | 3 |   |          |          |

|    |      |         |              |   |   |          |          |  |
|----|------|---------|--------------|---|---|----------|----------|--|
| 1  |      |         |              |   |   |          |          |  |
| 2  |      |         |              |   |   |          |          |  |
| 3  | 2 UK | 2020-12 | 4 UK-Wales   | 3 | 3 | 10       | 5.000337 |  |
| 4  | 2 UK | 2020-12 | 4 UK-Wales   | 3 | 4 | 2.75     | 1.432151 |  |
| 5  | 2 UK | 2020-12 | 4 UK-Wales   | 3 | 5 | 0.3      | #####    |  |
| 6  | 2 UK | 2020-12 | 5 UK-England | 1 | 1 | 1.542302 | #####    |  |
| 7  | 2 UK | 2020-12 | 5 UK-England | 1 | 2 | 1.269359 | #####    |  |
| 8  | 2 UK | 2020-12 | 5 UK-England | 1 | 3 | 1.696744 | #####    |  |
| 9  | 2 UK | 2020-12 | 5 UK-England | 1 | 4 | 1.153403 | #####    |  |
| 10 | 2 UK | 2020-12 | 5 UK-England | 1 | 5 | 2.201158 | #####    |  |
| 11 | 2 UK | 2020-12 | 5 UK-England | 2 | 1 | 1.453516 | #####    |  |
| 12 | 2 UK | 2020-12 | 5 UK-England | 2 | 2 | 1.727273 | #####    |  |
| 13 | 2 UK | 2020-12 | 5 UK-England | 2 | 3 | 1.192308 | #####    |  |
| 14 | 2 UK | 2020-12 | 5 UK-England | 2 | 4 | 1.266667 | #####    |  |
| 15 | 2 UK | 2020-12 | 5 UK-England | 2 | 5 | 1.727273 | #####    |  |
| 16 | 2 UK | 2020-12 | 5 UK-England | 3 | 1 | 1.587734 | #####    |  |
| 17 | 2 UK | 2020-12 | 5 UK-England | 3 | 2 | 1.083333 | #####    |  |
| 18 | 2 UK | 2020-12 | 5 UK-England | 3 | 3 | 2.071429 | #####    |  |
| 19 | 2 UK | 2020-12 | 5 UK-England | 3 | 4 | 1.125    | #####    |  |
| 20 | 2 UK | 2020-12 | 5 UK-England | 3 | 5 | 2.565217 | #####    |  |
| 21 | 2 UK | 2020-12 | 5 UK-London  | 1 | 1 | 1.13652  | #####    |  |
| 22 | 2 UK | 2020-12 | 5 UK-London  | 1 | 2 | #####    | #####    |  |
| 23 | 2 UK | 2020-12 | 5 UK-London  | 1 | 3 | 1.136045 | #####    |  |
| 24 | 2 UK | 2020-12 | 5 UK-London  | 1 | 4 | 1.416289 | #####    |  |
| 25 | 2 UK | 2020-12 | 5 UK-London  | 1 | 5 | 1.266483 | #####    |  |
| 26 | 2 UK | 2020-12 | 5 UK-London  | 2 | 1 | 1.456707 | #####    |  |
| 27 | 2 UK | 2020-12 | 5 UK-London  | 2 | 2 | 1.428571 | #####    |  |
| 28 | 2 UK | 2020-12 | 5 UK-London  | 2 | 3 | 1.5      | #####    |  |
| 29 | 2 UK | 2020-12 | 5 UK-London  | 2 | 4 | 1.5      | #####    |  |
| 30 | 2 UK | 2020-12 | 5 UK-London  | 2 | 5 | 1.333333 | 1.045342 |  |
| 31 | 2 UK | 2020-12 | 5 UK-London  | 3 | 1 | #####    | #####    |  |
| 32 | 2 UK | 2020-12 | 5 UK-London  | 3 | 2 | 0        | 0        |  |
| 33 | 2 UK | 2020-12 | 5 UK-London  | 3 | 3 | 1        | #####    |  |
| 34 | 2 UK | 2020-12 | 5 UK-London  | 3 | 4 | 1.363636 | #####    |  |
| 35 | 2 UK | 2020-12 | 5 UK-London  | 3 | 5 | 1.2      | #####    |  |
| 36 | 2 UK | 2020-12 | 5 UK-Norther | 1 | 1 | 1.309906 | #####    |  |
| 37 | 2 UK | 2020-12 | 5 UK-Norther | 1 | 2 | 1.603073 | #####    |  |
| 38 | 2 UK | 2020-12 | 5 UK-Norther | 1 | 3 | #####    | #####    |  |
| 39 | 2 UK | 2020-12 | 5 UK-Norther | 1 | 4 | 1.753387 | #####    |  |
| 40 | 2 UK | 2020-12 | 5 UK-Norther | 1 | 5 | #####    | #####    |  |
| 41 | 2 UK | 2020-12 | 5 UK-Norther | 2 | 1 | 1.494854 | #####    |  |
| 42 | 2 UK | 2020-12 | 5 UK-Norther | 2 | 2 | 3        | 0        |  |
| 43 | 2 UK | 2020-12 | 5 UK-Norther | 2 | 3 | #####    | #####    |  |
| 44 | 2 UK | 2020-12 | 5 UK-Norther | 2 | 4 | 1.416667 | #####    |  |
| 45 | 2 UK | 2020-12 | 5 UK-Norther | 2 | 5 | #####    | #####    |  |
| 46 | 2 UK | 2020-12 | 5 UK-Norther | 3 | 1 | 1.204285 | #####    |  |
| 47 | 2 UK | 2020-12 | 5 UK-Norther | 3 | 2 | 1        | #####    |  |
| 48 | 2 UK | 2020-12 | 5 UK-Norther | 3 | 3 | 1        | #####    |  |
| 49 | 2 UK | 2020-12 | 5 UK-Norther | 3 | 4 | 2.25     | 1.243818 |  |
| 50 | 2 UK | 2020-12 | 5 UK-Norther | 3 | 5 | 1        | 0        |  |
| 51 | 2 UK | 2020-12 | 5 UK-Overall | 1 | 1 | 1.424291 | #####    |  |
| 52 | 2 UK | 2020-12 | 5 UK-Overall | 1 | 2 | 1.310339 | #####    |  |
| 53 | 2 UK | 2020-12 | 5 UK-Overall | 1 | 3 | 1.373816 | #####    |  |
| 54 | 2 UK | 2020-12 | 5 UK-Overall | 1 | 4 | 1.290149 | #####    |  |
| 55 | 2 UK | 2020-12 | 5 UK-Overall | 1 | 5 | 1.92297  | #####    |  |
| 56 | 2 UK | 2020-12 | 5 UK-Overall | 2 | 1 | 1.440478 | #####    |  |
| 57 | 2 UK | 2020-12 | 5 UK-Overall | 2 | 2 | 1.779858 | #####    |  |
| 58 | 2 UK | 2020-12 | 5 UK-Overall | 2 | 3 | 1.24396  | #####    |  |
| 59 | 2 UK | 2020-12 | 5 UK-Overall | 2 |   |          |          |  |
| 60 | 2 UK | 2020-12 | 5 UK-Overall | 2 |   |          |          |  |

|    |      |         |              |   |   |          |          |  |
|----|------|---------|--------------|---|---|----------|----------|--|
| 1  |      |         |              |   |   |          |          |  |
| 2  |      |         |              |   |   |          |          |  |
| 3  | 2 UK | 2020-12 | 5 UK-Overall | 2 | 4 | 1.289652 | #####    |  |
| 4  | 2 UK | 2020-12 | 5 UK-Overall | 2 | 5 | 1.546054 | #####    |  |
| 5  | 2 UK | 2020-12 | 5 UK-Overall | 3 | 1 | 1.415183 | #####    |  |
| 6  | 2 UK | 2020-12 | 5 UK-Overall | 3 | 2 | 1.063675 | #####    |  |
| 7  | 2 UK | 2020-12 | 5 UK-Overall | 3 | 3 | 1.451396 | #####    |  |
| 8  | 2 UK | 2020-12 | 5 UK-Overall | 3 | 4 | 1.290358 | #####    |  |
| 9  | 2 UK | 2020-12 | 5 UK-Overall | 3 | 5 | 2.225511 | #####    |  |
| 10 | 2 UK | 2020-12 | 5 UK-Scotlan | 1 | 1 | 1.244044 | #####    |  |
| 11 | 2 UK | 2020-12 | 5 UK-Scotlan | 1 | 2 | 2.142021 | #####    |  |
| 12 | 2 UK | 2020-12 | 5 UK-Scotlan | 1 | 3 | #####    | #####    |  |
| 13 | 2 UK | 2020-12 | 5 UK-Scotlan | 1 | 4 | 1.236862 | #####    |  |
| 14 | 2 UK | 2020-12 | 5 UK-Scotlan | 1 | 5 | 1.268024 | #####    |  |
| 15 | 2 UK | 2020-12 | 5 UK-Scotlan | 2 | 1 | 1.346024 | #####    |  |
| 16 | 2 UK | 2020-12 | 5 UK-Scotlan | 2 | 2 | 2        | #####    |  |
| 17 | 2 UK | 2020-12 | 5 UK-Scotlan | 2 | 3 | 1.333333 | #####    |  |
| 18 | 2 UK | 2020-12 | 5 UK-Scotlan | 2 | 4 | 0.9375   | #####    |  |
| 19 | 2 UK | 2020-12 | 5 UK-Scotlan | 2 | 5 | 1.428571 | #####    |  |
| 20 | 2 UK | 2020-12 | 5 UK-Scotlan | 3 | 1 | 1.181443 | #####    |  |
| 21 | 2 UK | 2020-12 | 5 UK-Scotlan | 3 | 2 | 2.2      | #####    |  |
| 22 | 2 UK | 2020-12 | 5 UK-Scotlan | 3 | 3 | #####    | #####    |  |
| 23 | 2 UK | 2020-12 | 5 UK-Scotlan | 3 | 4 | 1.5      | #####    |  |
| 24 | 2 UK | 2020-12 | 5 UK-Scotlan | 3 | 5 | 1.142857 | #####    |  |
| 25 | 2 UK | 2020-12 | 5 UK-Wales   | 1 | 1 | 1.491751 | #####    |  |
| 26 | 2 UK | 2020-12 | 5 UK-Wales   | 1 | 2 | 2.75     | 1.386411 |  |
| 27 | 2 UK | 2020-12 | 5 UK-Wales   | 1 | 3 | #####    | #####    |  |
| 28 | 2 UK | 2020-12 | 5 UK-Wales   | 1 | 4 | 1.919451 | #####    |  |
| 29 | 2 UK | 2020-12 | 5 UK-Wales   | 1 | 5 | 1.345522 | #####    |  |
| 30 | 2 UK | 2020-12 | 5 UK-Wales   | 2 | 1 | 1.398342 | #####    |  |
| 31 | 2 UK | 2020-12 | 5 UK-Wales   | 2 | 2 | 2.75     | 1.386411 |  |
| 32 | 2 UK | 2020-12 | 5 UK-Wales   | 2 | 3 | 0.9      | #####    |  |
| 33 | 2 UK | 2020-12 | 5 UK-Wales   | 2 | 4 | 1.318182 | #####    |  |
| 34 | 2 UK | 2020-12 | 5 UK-Wales   | 2 | 5 | 0.7      | #####    |  |
| 35 | 2 UK | 2020-12 | 5 UK-Wales   | 3 | 1 | 1.60434  | #####    |  |
| 36 | 2 UK | 2020-12 | 5 UK-Wales   | 3 | 3 | 0        | 0        |  |
| 37 | 2 UK | 2020-12 | 5 UK-Wales   | 3 | 4 | 2.5      | #####    |  |
| 38 | 2 UK | 2020-12 | 5 UK-Wales   | 3 | 5 | 1.8      | #####    |  |
| 39 | 2 UK | 2020-12 | 5 UK-Wales   | 3 | 5 | 1.8      | #####    |  |
| 40 | 2 UK | 2020-13 | 1 UK-Englan  | 1 | 1 | 3.282625 | #####    |  |
| 41 | 2 UK | 2020-13 | 1 UK-Englan  | 1 | 2 | 4.554909 | #####    |  |
| 42 | 2 UK | 2020-13 | 1 UK-Englan  | 1 | 3 | 3.925919 | #####    |  |
| 43 | 2 UK | 2020-13 | 1 UK-Englan  | 1 | 4 | 3.099774 | #####    |  |
| 44 | 2 UK | 2020-13 | 1 UK-Englan  | 1 | 5 | 1.837462 | #####    |  |
| 45 | 2 UK | 2020-13 | 1 UK-Englan  | 2 | 1 | 2.980474 | #####    |  |
| 46 | 2 UK | 2020-13 | 1 UK-Englan  | 2 | 2 | 4.307692 | #####    |  |
| 47 | 2 UK | 2020-13 | 1 UK-Englan  | 2 | 3 | 3.323404 | #####    |  |
| 48 | 2 UK | 2020-13 | 1 UK-Englan  | 2 | 4 | 3.038363 | #####    |  |
| 49 | 2 UK | 2020-13 | 1 UK-Englan  | 2 | 5 | 1.621399 | #####    |  |
| 50 | 2 UK | 2020-13 | 1 UK-Englan  | 3 | 1 | 3.610241 | #####    |  |
| 51 | 2 UK | 2020-13 | 1 UK-Englan  | 3 | 2 | 5        | 1.656067 |  |
| 52 | 2 UK | 2020-13 | 1 UK-Englan  | 3 | 3 | 4.475728 | #####    |  |
| 53 | 2 UK | 2020-13 | 1 UK-Englan  | 3 | 4 | 3.163366 | #####    |  |
| 54 | 2 UK | 2020-13 | 1 UK-Englan  | 3 | 5 | 2.099379 | #####    |  |
| 55 | 2 UK | 2020-13 | 1 UK-London  | 1 | 1 | 2.49386  | #####    |  |
| 56 | 2 UK | 2020-13 | 1 UK-London  | 1 | 2 | 2.70383  | #####    |  |
| 57 | 2 UK | 2020-13 | 1 UK-London  | 1 | 3 | 2.575646 | #####    |  |
| 58 | 2 UK | 2020-13 | 1 UK-London  | 1 | 4 | 2.73457  | #####    |  |
| 59 | 2 UK | 2020-13 | 1 UK-London  | 1 | 5 | 1.474965 | #####    |  |
| 60 | 2 UK | 2020-13 | 1 UK-London  | 1 | 5 | 1.474965 | #####    |  |

|    |      |         |              |   |   |          |          |  |
|----|------|---------|--------------|---|---|----------|----------|--|
| 1  |      |         |              |   |   |          |          |  |
| 2  |      |         |              |   |   |          |          |  |
| 3  | 2 UK | 2020-13 | 1 UK-London  | 2 | 1 | 2.458155 | #####    |  |
| 4  | 2 UK | 2020-13 | 1 UK-London  | 2 | 2 | 2.65     | #####    |  |
| 5  | 2 UK | 2020-13 | 1 UK-London  | 2 | 3 | 2.639344 | #####    |  |
| 6  | 2 UK | 2020-13 | 1 UK-London  | 2 | 4 | 2.571429 | #####    |  |
| 7  | 2 UK | 2020-13 | 1 UK-London  | 2 | 5 | 1.568182 | #####    |  |
| 8  | 2 UK | 2020-13 | 1 UK-London  | 3 | 1 | 2.53567  | #####    |  |
| 9  | 2 UK | 2020-13 | 1 UK-London  | 3 | 2 | 2.75     | #####    |  |
| 10 | 2 UK | 2020-13 | 1 UK-London  | 3 | 3 | 2.5      | #####    |  |
| 11 | 2 UK | 2020-13 | 1 UK-London  | 3 | 4 | 2.928571 | #####    |  |
| 12 | 2 UK | 2020-13 | 1 UK-London  | 3 | 5 | 1.333333 | #####    |  |
| 13 | 2 UK | 2020-13 | 1 UK-Norther | 1 | 1 | 3.687485 | #####    |  |
| 14 | 2 UK | 2020-13 | 1 UK-Norther | 1 | 2 | 5.788954 | 1.910702 |  |
| 15 | 2 UK | 2020-13 | 1 UK-Norther | 1 | 3 | 3.533214 | #####    |  |
| 16 | 2 UK | 2020-13 | 1 UK-Norther | 1 | 4 | 3.899199 | #####    |  |
| 17 | 2 UK | 2020-13 | 1 UK-Norther | 1 | 5 | 1.764829 | #####    |  |
| 18 | 2 UK | 2020-13 | 1 UK-Norther | 2 | 1 | 4.076009 | #####    |  |
| 19 | 2 UK | 2020-13 | 1 UK-Norther | 2 | 2 | 6.222222 | 2.566709 |  |
| 20 | 2 UK | 2020-13 | 1 UK-Norther | 2 | 3 | 4.787234 | #####    |  |
| 21 | 2 UK | 2020-13 | 1 UK-Norther | 2 | 4 | 3.341176 | #####    |  |
| 22 | 2 UK | 2020-13 | 1 UK-Norther | 2 | 5 | 1.484848 | #####    |  |
| 23 | 2 UK | 2020-13 | 1 UK-Norther | 3 | 1 | 3.08881  | #####    |  |
| 24 | 2 UK | 2020-13 | 1 UK-Norther | 3 | 2 | 4.666667 | 1.515456 |  |
| 25 | 2 UK | 2020-13 | 1 UK-Norther | 3 | 3 | 2        | #####    |  |
| 26 | 2 UK | 2020-13 | 1 UK-Norther | 3 | 4 | 4.913043 | 1.269045 |  |
| 27 | 2 UK | 2020-13 | 1 UK-Norther | 3 | 5 | 2.111111 | #####    |  |
| 28 | 2 UK | 2020-13 | 1 UK-Overall | 1 | 1 | 3.169341 | #####    |  |
| 29 | 2 UK | 2020-13 | 1 UK-Overall | 1 | 2 | 4.148649 | #####    |  |
| 30 | 2 UK | 2020-13 | 1 UK-Overall | 1 | 3 | 3.689426 | #####    |  |
| 31 | 2 UK | 2020-13 | 1 UK-Overall | 1 | 4 | 3.112238 | #####    |  |
| 32 | 2 UK | 2020-13 | 1 UK-Overall | 1 | 5 | 1.775456 | #####    |  |
| 33 | 2 UK | 2020-13 | 1 UK-Overall | 2 | 1 | 2.931305 | #####    |  |
| 34 | 2 UK | 2020-13 | 1 UK-Overall | 2 | 2 | 3.979814 | #####    |  |
| 35 | 2 UK | 2020-13 | 1 UK-Overall | 2 | 3 | 3.285709 | #####    |  |
| 36 | 2 UK | 2020-13 | 1 UK-Overall | 2 | 4 | 3.027506 | #####    |  |
| 37 | 2 UK | 2020-13 | 1 UK-Overall | 2 | 5 | 1.593915 | #####    |  |
| 38 | 2 UK | 2020-13 | 1 UK-Overall | 3 | 1 | 3.436346 | #####    |  |
| 39 | 2 UK | 2020-13 | 1 UK-Overall | 3 | 2 | 4.398915 | 1.012328 |  |
| 40 | 2 UK | 2020-13 | 1 UK-Overall | 3 | 3 | 4.087213 | #####    |  |
| 41 | 2 UK | 2020-13 | 1 UK-Overall | 3 | 4 | 3.205676 | #####    |  |
| 42 | 2 UK | 2020-13 | 1 UK-Overall | 3 | 5 | 2.002632 | #####    |  |
| 43 | 2 UK | 2020-13 | 1 UK-Scotlan | 1 | 1 | 3.214916 | #####    |  |
| 44 | 2 UK | 2020-13 | 1 UK-Scotlan | 1 | 2 | 3.946007 | 1.352883 |  |
| 45 | 2 UK | 2020-13 | 1 UK-Scotlan | 1 | 3 | 3.546213 | #####    |  |
| 46 | 2 UK | 2020-13 | 1 UK-Scotlan | 1 | 4 | 3.478551 | #####    |  |
| 47 | 2 UK | 2020-13 | 1 UK-Scotlan | 1 | 5 | 1.820183 | #####    |  |
| 48 | 2 UK | 2020-13 | 1 UK-Scotlan | 2 | 1 | 2.953258 | #####    |  |
| 49 | 2 UK | 2020-13 | 1 UK-Scotlan | 2 | 2 | 1.863636 | #####    |  |
| 50 | 2 UK | 2020-13 | 1 UK-Scotlan | 2 | 3 | 3.420635 | #####    |  |
| 51 | 2 UK | 2020-13 | 1 UK-Scotlan | 2 | 4 | 3.564246 | #####    |  |
| 52 | 2 UK | 2020-13 | 1 UK-Scotlan | 2 | 5 | 1.631579 | #####    |  |
| 53 | 2 UK | 2020-13 | 1 UK-Scotlan | 3 | 1 | 3.52816  | #####    |  |
| 54 | 2 UK | 2020-13 | 1 UK-Scotlan | 3 | 2 | 7.285714 | 3.173536 |  |
| 55 | 2 UK | 2020-13 | 1 UK-Scotlan | 3 | 3 | 3.673077 | #####    |  |
| 56 | 2 UK | 2020-13 | 1 UK-Scotlan | 3 | 4 | 3.363636 | #####    |  |
| 57 | 2 UK | 2020-13 | 1 UK-Scotlan | 3 | 5 | 2.04918  | #####    |  |
| 58 | 2 UK | 2020-13 | 1 UK-Wales   | 1 | 1 | 3.087319 | #####    |  |
| 59 | 2 UK | 2020-13 | 1 UK-Wales   | 1 | 1 | 3.087319 | #####    |  |
| 60 | 2 UK | 2020-13 | 1 UK-Wales   | 1 | 1 | 3.087319 | #####    |  |

1  
2  
3  
4  
5  
6  
7  
8  
9  
10  
11  
12  
13  
14  
15  
16  
17  
18  
19  
20  
21  
22  
23  
24  
25  
26  
27  
28  
29  
30  
31  
32  
33  
34  
35  
36  
37  
38  
39  
40  
41  
42  
43  
44  
45  
46  
47  
48  
49  
50  
51  
52  
53  
54  
55  
56  
57  
58  
59  
60

|      |         |              |   |   |          |          |
|------|---------|--------------|---|---|----------|----------|
| 2 UK | 2020-13 | 1 UK-Wales   | 1 | 2 | 2.717594 | #####    |
| 2 UK | 2020-13 | 1 UK-Wales   | 1 | 3 | 4.450641 | #####    |
| 2 UK | 2020-13 | 1 UK-Wales   | 1 | 4 | 3.174292 | #####    |
| 2 UK | 2020-13 | 1 UK-Wales   | 1 | 5 | 1.43524  | #####    |
| 2 UK | 2020-13 | 1 UK-Wales   | 2 | 1 | 2.786696 | #####    |
| 2 UK | 2020-13 | 1 UK-Wales   | 2 | 2 | 3.5      | #####    |
| 2 UK | 2020-13 | 1 UK-Wales   | 2 | 3 | 3.783133 | #####    |
| 2 UK | 2020-13 | 1 UK-Wales   | 2 | 4 | 2.847682 | #####    |
| 2 UK | 2020-13 | 1 UK-Wales   | 2 | 5 | 1.329787 | #####    |
| 2 UK | 2020-13 | 1 UK-Wales   | 3 | 1 | 3.440361 | #####    |
| 2 UK | 2020-13 | 1 UK-Wales   | 3 | 2 | 2.333333 | #####    |
| 2 UK | 2020-13 | 1 UK-Wales   | 3 | 3 | 5.363636 | 1.315203 |
| 2 UK | 2020-13 | 1 UK-Wales   | 3 | 4 | 3.550725 | #####    |
| 2 UK | 2020-13 | 1 UK-Wales   | 3 | 5 | 1.586957 | #####    |
| 2 UK | 2020-13 | 2 UK-England | 1 | 1 | 1.521442 | #####    |
| 2 UK | 2020-13 | 2 UK-England | 1 | 2 | 1.892157 | #####    |
| 2 UK | 2020-13 | 2 UK-England | 1 | 3 | 1.800899 | #####    |
| 2 UK | 2020-13 | 2 UK-England | 1 | 4 | 1.385926 | #####    |
| 2 UK | 2020-13 | 2 UK-England | 1 | 5 | 1.015917 | #####    |
| 2 UK | 2020-13 | 2 UK-England | 2 | 1 | 1.604644 | #####    |
| 2 UK | 2020-13 | 2 UK-England | 2 | 2 | 2.115942 | #####    |
| 2 UK | 2020-13 | 2 UK-England | 2 | 3 | 1.992308 | #####    |
| 2 UK | 2020-13 | 2 UK-England | 2 | 4 | 1.384798 | #####    |
| 2 UK | 2020-13 | 2 UK-England | 2 | 5 | 1.003984 | #####    |
| 2 UK | 2020-13 | 2 UK-England | 3 | 1 | 1.433007 | #####    |
| 2 UK | 2020-13 | 2 UK-England | 3 | 2 | 1.55     | #####    |
| 2 UK | 2020-13 | 2 UK-England | 3 | 3 | 1.62931  | #####    |
| 2 UK | 2020-13 | 2 UK-England | 3 | 4 | 1.387097 | #####    |
| 2 UK | 2020-13 | 2 UK-England | 3 | 5 | 1.030675 | #####    |
| 2 UK | 2020-13 | 2 UK-London  | 1 | 1 | 1.43797  | #####    |
| 2 UK | 2020-13 | 2 UK-London  | 1 | 2 | 2.332051 | #####    |
| 2 UK | 2020-13 | 2 UK-London  | 1 | 3 | 1.4678   | #####    |
| 2 UK | 2020-13 | 2 UK-London  | 1 | 4 | 1.328311 | #####    |
| 2 UK | 2020-13 | 2 UK-London  | 1 | 5 | #####    | #####    |
| 2 UK | 2020-13 | 2 UK-London  | 2 | 1 | 1.528974 | #####    |
| 2 UK | 2020-13 | 2 UK-London  | 2 | 2 | 2.238095 | #####    |
| 2 UK | 2020-13 | 2 UK-London  | 2 | 3 | 1.661765 | #####    |
| 2 UK | 2020-13 | 2 UK-London  | 2 | 4 | 1.481928 | #####    |
| 2 UK | 2020-13 | 2 UK-London  | 2 | 5 | 0.6875   | #####    |
| 2 UK | 2020-13 | 2 UK-London  | 3 | 1 | 1.330309 | #####    |
| 2 UK | 2020-13 | 2 UK-London  | 3 | 2 | 2.416667 | #####    |
| 2 UK | 2020-13 | 2 UK-London  | 3 | 3 | 1.230769 | #####    |
| 2 UK | 2020-13 | 2 UK-London  | 3 | 4 | 1.147541 | #####    |
| 2 UK | 2020-13 | 2 UK-London  | 3 | 5 | 0.75     | #####    |
| 2 UK | 2020-13 | 2 UK-Norther | 1 | 1 | 1.714378 | #####    |
| 2 UK | 2020-13 | 2 UK-Norther | 1 | 2 | 2.092843 | #####    |
| 2 UK | 2020-13 | 2 UK-Norther | 1 | 3 | 1.942994 | #####    |
| 2 UK | 2020-13 | 2 UK-Norther | 1 | 4 | 1.676303 | #####    |
| 2 UK | 2020-13 | 2 UK-Norther | 1 | 5 | #####    | #####    |
| 2 UK | 2020-13 | 2 UK-Norther | 2 | 1 | 1.618493 | #####    |
| 2 UK | 2020-13 | 2 UK-Norther | 2 | 2 | 2        | #####    |
| 2 UK | 2020-13 | 2 UK-Norther | 2 | 3 | 2.02     | #####    |
| 2 UK | 2020-13 | 2 UK-Norther | 2 | 4 | 1.393617 | #####    |
| 2 UK | 2020-13 | 2 UK-Norther | 2 | 5 | #####    | #####    |
| 2 UK | 2020-13 | 2 UK-Norther | 3 | 1 | 1.849881 | #####    |
| 2 UK | 2020-13 | 2 UK-Norther | 3 | 2 | 2.333333 | #####    |

|    |      |         |              |   |   |          |       |  |  |
|----|------|---------|--------------|---|---|----------|-------|--|--|
| 1  |      |         |              |   |   |          |       |  |  |
| 2  |      |         |              |   |   |          |       |  |  |
| 3  | 2 UK | 2020-13 | 2 UK-Norther | 3 | 3 | 1.857143 | ##### |  |  |
| 4  | 2 UK | 2020-13 | 2 UK-Norther | 3 | 4 | 2.142857 | ##### |  |  |
| 5  | 2 UK | 2020-13 | 2 UK-Norther | 3 | 5 | 1.2      | ##### |  |  |
| 6  | 2 UK | 2020-13 | 2 UK-Overall | 1 | 1 | 1.509035 | ##### |  |  |
| 7  | 2 UK | 2020-13 | 2 UK-Overall | 1 | 2 | 1.972286 | ##### |  |  |
| 8  | 2 UK | 2020-13 | 2 UK-Overall | 1 | 3 | 1.734814 | ##### |  |  |
| 9  | 2 UK | 2020-13 | 2 UK-Overall | 1 | 4 | 1.394325 | ##### |  |  |
| 10 | 2 UK | 2020-13 | 2 UK-Overall | 1 | 5 | #####    | ##### |  |  |
| 11 | 2 UK | 2020-13 | 2 UK-Overall | 2 | 1 | 1.580094 | ##### |  |  |
| 12 | 2 UK | 2020-13 | 2 UK-Overall | 2 | 2 | 2.089358 | ##### |  |  |
| 13 | 2 UK | 2020-13 | 2 UK-Overall | 2 | 3 | 1.917009 | ##### |  |  |
| 14 | 2 UK | 2020-13 | 2 UK-Overall | 2 | 4 | 1.407311 | ##### |  |  |
| 15 | 2 UK | 2020-13 | 2 UK-Overall | 2 | 5 | #####    | ##### |  |  |
| 16 | 2 UK | 2020-13 | 2 UK-Overall | 3 | 1 | 1.430687 | ##### |  |  |
| 17 | 2 UK | 2020-13 | 2 UK-Overall | 3 | 2 | 1.814873 | ##### |  |  |
| 18 | 2 UK | 2020-13 | 2 UK-Overall | 3 | 3 | 1.557148 | ##### |  |  |
| 19 | 2 UK | 2020-13 | 2 UK-Overall | 3 | 4 | 1.380116 | ##### |  |  |
| 20 | 2 UK | 2020-13 | 2 UK-Overall | 3 | 5 | 1.01993  | ##### |  |  |
| 21 | 2 UK | 2020-13 | 2 UK-Overall | 3 | 5 | 1.01993  | ##### |  |  |
| 22 | 2 UK | 2020-13 | 2 UK-Scotlan | 1 | 1 | 1.412742 | ##### |  |  |
| 23 | 2 UK | 2020-13 | 2 UK-Scotlan | 1 | 2 | 1.730302 | ##### |  |  |
| 24 | 2 UK | 2020-13 | 2 UK-Scotlan | 1 | 3 | 1.494158 | ##### |  |  |
| 25 | 2 UK | 2020-13 | 2 UK-Scotlan | 1 | 4 | 1.460511 | ##### |  |  |
| 26 | 2 UK | 2020-13 | 2 UK-Scotlan | 1 | 5 | 1.007842 | ##### |  |  |
| 27 | 2 UK | 2020-13 | 2 UK-Scotlan | 2 | 1 | 1.468737 | ##### |  |  |
| 28 | 2 UK | 2020-13 | 2 UK-Scotlan | 2 | 2 | 1.608696 | ##### |  |  |
| 29 | 2 UK | 2020-13 | 2 UK-Scotlan | 2 | 3 | 1.735294 | ##### |  |  |
| 30 | 2 UK | 2020-13 | 2 UK-Scotlan | 2 | 4 | 1.497354 | ##### |  |  |
| 31 | 2 UK | 2020-13 | 2 UK-Scotlan | 2 | 5 | #####    | ##### |  |  |
| 32 | 2 UK | 2020-13 | 2 UK-Scotlan | 3 | 1 | 1.347985 | ##### |  |  |
| 33 | 2 UK | 2020-13 | 2 UK-Scotlan | 3 | 2 | 1.888889 | ##### |  |  |
| 34 | 2 UK | 2020-13 | 2 UK-Scotlan | 3 | 3 | 1.25     | ##### |  |  |
| 35 | 2 UK | 2020-13 | 2 UK-Scotlan | 3 | 4 | 1.414141 | ##### |  |  |
| 36 | 2 UK | 2020-13 | 2 UK-Scotlan | 3 | 5 | 1.193548 | ##### |  |  |
| 37 | 2 UK | 2020-13 | 2 UK-Wales   | 1 | 1 | 1.586434 | ##### |  |  |
| 38 | 2 UK | 2020-13 | 2 UK-Wales   | 1 | 2 | 2.146895 | ##### |  |  |
| 39 | 2 UK | 2020-13 | 2 UK-Wales   | 1 | 3 | 2.040945 | ##### |  |  |
| 40 | 2 UK | 2020-13 | 2 UK-Wales   | 1 | 4 | 1.400843 | ##### |  |  |
| 41 | 2 UK | 2020-13 | 2 UK-Wales   | 1 | 5 | 1.019293 | ##### |  |  |
| 42 | 2 UK | 2020-13 | 2 UK-Wales   | 2 | 1 | 1.573369 | ##### |  |  |
| 43 | 2 UK | 2020-13 | 2 UK-Wales   | 2 | 2 | 2.111111 | ##### |  |  |
| 44 | 2 UK | 2020-13 | 2 UK-Wales   | 2 | 3 | 2.101124 | ##### |  |  |
| 45 | 2 UK | 2020-13 | 2 UK-Wales   | 2 | 4 | 1.3375   | ##### |  |  |
| 46 | 2 UK | 2020-13 | 2 UK-Wales   | 2 | 5 | 1.061856 | ##### |  |  |
| 47 | 2 UK | 2020-13 | 2 UK-Wales   | 3 | 1 | 1.602046 | ##### |  |  |
| 48 | 2 UK | 2020-13 | 2 UK-Wales   | 3 | 2 | 2.166667 | ##### |  |  |
| 49 | 2 UK | 2020-13 | 2 UK-Wales   | 3 | 3 | 1.956522 | ##### |  |  |
| 50 | 2 UK | 2020-13 | 2 UK-Wales   | 3 | 4 | 1.472973 | ##### |  |  |
| 51 | 2 UK | 2020-13 | 2 UK-Wales   | 3 | 5 | #####    | ##### |  |  |
| 52 | 2 UK | 2020-13 | 3 UK-Englan  | 1 | 1 | 0        | 0     |  |  |
| 53 | 2 UK | 2020-13 | 3 UK-Englan  | 1 | 2 | 0        | 0     |  |  |
| 54 | 2 UK | 2020-13 | 3 UK-Englan  | 1 | 3 | 0        | 0     |  |  |
| 55 | 2 UK | 2020-13 | 3 UK-Englan  | 1 | 4 | 0        | 0     |  |  |
| 56 | 2 UK | 2020-13 | 3 UK-Englan  | 1 | 5 | 0        | 0     |  |  |
| 57 | 2 UK | 2020-13 | 3 UK-Englan  | 2 | 1 | 0        | 0     |  |  |
| 58 | 2 UK | 2020-13 | 3 UK-Englan  | 2 | 2 | 0        | 0     |  |  |
| 59 | 2 UK | 2020-13 | 3 UK-Englan  | 2 | 3 | 0        | 0     |  |  |
| 60 | 2 UK | 2020-13 | 3 UK-Englan  | 2 | 3 | 0        | 0     |  |  |

|    |      |         |              |   |   |   |   |
|----|------|---------|--------------|---|---|---|---|
| 1  |      |         |              |   |   |   |   |
| 2  |      |         |              |   |   |   |   |
| 3  | 2 UK | 2020-13 | 3 UK-England | 2 | 4 | 0 | 0 |
| 4  | 2 UK | 2020-13 | 3 UK-England | 2 | 5 | 0 | 0 |
| 5  | 2 UK | 2020-13 | 3 UK-England | 3 | 1 | 0 | 0 |
| 6  | 2 UK | 2020-13 | 3 UK-England | 3 | 2 | 0 | 0 |
| 7  | 2 UK | 2020-13 | 3 UK-England | 3 | 3 | 0 | 0 |
| 8  | 2 UK | 2020-13 | 3 UK-England | 3 | 4 | 0 | 0 |
| 9  | 2 UK | 2020-13 | 3 UK-England | 3 | 5 | 0 | 0 |
| 10 | 2 UK | 2020-13 | 3 UK-London  | 1 | 1 | 0 | 0 |
| 11 | 2 UK | 2020-13 | 3 UK-London  | 1 | 2 | 0 | 0 |
| 12 | 2 UK | 2020-13 | 3 UK-London  | 1 | 3 | 0 | 0 |
| 13 | 2 UK | 2020-13 | 3 UK-London  | 1 | 4 | 0 | 0 |
| 14 | 2 UK | 2020-13 | 3 UK-London  | 1 | 5 | 0 | 0 |
| 15 | 2 UK | 2020-13 | 3 UK-London  | 2 | 1 | 0 | 0 |
| 16 | 2 UK | 2020-13 | 3 UK-London  | 2 | 2 | 0 | 0 |
| 17 | 2 UK | 2020-13 | 3 UK-London  | 2 | 3 | 0 | 0 |
| 18 | 2 UK | 2020-13 | 3 UK-London  | 2 | 4 | 0 | 0 |
| 19 | 2 UK | 2020-13 | 3 UK-London  | 2 | 5 | 0 | 0 |
| 20 | 2 UK | 2020-13 | 3 UK-London  | 3 | 1 | 0 | 0 |
| 21 | 2 UK | 2020-13 | 3 UK-London  | 3 | 2 | 0 | 0 |
| 22 | 2 UK | 2020-13 | 3 UK-London  | 3 | 3 | 0 | 0 |
| 23 | 2 UK | 2020-13 | 3 UK-London  | 3 | 4 | 0 | 0 |
| 24 | 2 UK | 2020-13 | 3 UK-London  | 3 | 5 | 0 | 0 |
| 25 | 2 UK | 2020-13 | 3 UK-London  | 3 | 5 | 0 | 0 |
| 26 | 2 UK | 2020-13 | 3 UK-Norther | 1 | 1 | 0 | 0 |
| 27 | 2 UK | 2020-13 | 3 UK-Norther | 1 | 2 | 0 | 0 |
| 28 | 2 UK | 2020-13 | 3 UK-Norther | 1 | 3 | 0 | 0 |
| 29 | 2 UK | 2020-13 | 3 UK-Norther | 1 | 4 | 0 | 0 |
| 30 | 2 UK | 2020-13 | 3 UK-Norther | 1 | 5 | 0 | 0 |
| 31 | 2 UK | 2020-13 | 3 UK-Norther | 2 | 1 | 0 | 0 |
| 32 | 2 UK | 2020-13 | 3 UK-Norther | 2 | 2 | 0 | 0 |
| 33 | 2 UK | 2020-13 | 3 UK-Norther | 2 | 3 | 0 | 0 |
| 34 | 2 UK | 2020-13 | 3 UK-Norther | 2 | 4 | 0 | 0 |
| 35 | 2 UK | 2020-13 | 3 UK-Norther | 2 | 5 | 0 | 0 |
| 36 | 2 UK | 2020-13 | 3 UK-Norther | 3 | 1 | 0 | 0 |
| 37 | 2 UK | 2020-13 | 3 UK-Norther | 3 | 2 | 0 | 0 |
| 38 | 2 UK | 2020-13 | 3 UK-Norther | 3 | 3 | 0 | 0 |
| 39 | 2 UK | 2020-13 | 3 UK-Norther | 3 | 4 | 0 | 0 |
| 40 | 2 UK | 2020-13 | 3 UK-Norther | 3 | 5 | 0 | 0 |
| 41 | 2 UK | 2020-13 | 3 UK-Overall | 1 | 1 | 0 | 0 |
| 42 | 2 UK | 2020-13 | 3 UK-Overall | 1 | 2 | 0 | 0 |
| 43 | 2 UK | 2020-13 | 3 UK-Overall | 1 | 3 | 0 | 0 |
| 44 | 2 UK | 2020-13 | 3 UK-Overall | 1 | 4 | 0 | 0 |
| 45 | 2 UK | 2020-13 | 3 UK-Overall | 1 | 5 | 0 | 0 |
| 46 | 2 UK | 2020-13 | 3 UK-Overall | 2 | 1 | 0 | 0 |
| 47 | 2 UK | 2020-13 | 3 UK-Overall | 2 | 2 | 0 | 0 |
| 48 | 2 UK | 2020-13 | 3 UK-Overall | 2 | 3 | 0 | 0 |
| 49 | 2 UK | 2020-13 | 3 UK-Overall | 2 | 4 | 0 | 0 |
| 50 | 2 UK | 2020-13 | 3 UK-Overall | 2 | 5 | 0 | 0 |
| 51 | 2 UK | 2020-13 | 3 UK-Overall | 3 | 1 | 0 | 0 |
| 52 | 2 UK | 2020-13 | 3 UK-Overall | 3 | 2 | 0 | 0 |
| 53 | 2 UK | 2020-13 | 3 UK-Overall | 3 | 3 | 0 | 0 |
| 54 | 2 UK | 2020-13 | 3 UK-Overall | 3 | 4 | 0 | 0 |
| 55 | 2 UK | 2020-13 | 3 UK-Overall | 3 | 5 | 0 | 0 |
| 56 | 2 UK | 2020-13 | 3 UK-Scotlan | 1 | 1 | 0 | 0 |
| 57 | 2 UK | 2020-13 | 3 UK-Scotlan | 1 | 2 | 0 | 0 |
| 58 | 2 UK | 2020-13 | 3 UK-Scotlan | 1 | 3 | 0 | 0 |
| 59 | 2 UK | 2020-13 | 3 UK-Scotlan | 1 | 4 | 0 | 0 |
| 60 | 2 UK | 2020-13 | 3 UK-Scotlan | 1 | 4 | 0 | 0 |



|    |      |         |              |   |   |          |        |  |
|----|------|---------|--------------|---|---|----------|--------|--|
| 1  |      |         |              |   |   |          |        |  |
| 2  |      |         |              |   |   |          |        |  |
| 3  | 2 UK | 2020-13 | 3 UK-Scotlan | 1 | 5 | 0        | 0      |  |
| 4  | 2 UK | 2020-13 | 3 UK-Scotlan | 2 | 1 | 0        | 0      |  |
| 5  | 2 UK | 2020-13 | 3 UK-Scotlan | 2 | 2 | 0        | 0      |  |
| 6  | 2 UK | 2020-13 | 3 UK-Scotlan | 2 | 3 | 0        | 0      |  |
| 7  | 2 UK | 2020-13 | 3 UK-Scotlan | 2 | 4 | 0        | 0      |  |
| 8  | 2 UK | 2020-13 | 3 UK-Scotlan | 2 | 5 | 0        | 0      |  |
| 9  | 2 UK | 2020-13 | 3 UK-Scotlan | 3 | 1 | 0        | 0      |  |
| 10 | 2 UK | 2020-13 | 3 UK-Scotlan | 3 | 2 | 0        | 0      |  |
| 11 | 2 UK | 2020-13 | 3 UK-Scotlan | 3 | 3 | 0        | 0      |  |
| 12 | 2 UK | 2020-13 | 3 UK-Scotlan | 3 | 4 | 0        | 0      |  |
| 13 | 2 UK | 2020-13 | 3 UK-Scotlan | 3 | 5 | 0        | 0      |  |
| 14 | 2 UK | 2020-13 | 3 UK-Wales   | 1 | 1 | 0        | 0      |  |
| 15 | 2 UK | 2020-13 | 3 UK-Wales   | 1 | 2 | 0        | 0      |  |
| 16 | 2 UK | 2020-13 | 3 UK-Wales   | 1 | 3 | 0        | 0      |  |
| 17 | 2 UK | 2020-13 | 3 UK-Wales   | 1 | 4 | 0        | 0      |  |
| 18 | 2 UK | 2020-13 | 3 UK-Wales   | 1 | 5 | 0        | 0      |  |
| 19 | 2 UK | 2020-13 | 3 UK-Wales   | 2 | 1 | 0        | 0      |  |
| 20 | 2 UK | 2020-13 | 3 UK-Wales   | 2 | 2 | 0        | 0      |  |
| 21 | 2 UK | 2020-13 | 3 UK-Wales   | 2 | 3 | 0        | 0      |  |
| 22 | 2 UK | 2020-13 | 3 UK-Wales   | 2 | 4 | 0        | 0      |  |
| 23 | 2 UK | 2020-13 | 3 UK-Wales   | 2 | 5 | 0        | 0      |  |
| 24 | 2 UK | 2020-13 | 3 UK-Wales   | 3 | 1 | 0        | 0      |  |
| 25 | 2 UK | 2020-13 | 3 UK-Wales   | 3 | 2 | 0        | 0      |  |
| 26 | 2 UK | 2020-13 | 3 UK-Wales   | 3 | 3 | 0        | 0      |  |
| 27 | 2 UK | 2020-13 | 3 UK-Wales   | 3 | 4 | 0        | 0      |  |
| 28 | 2 UK | 2020-13 | 3 UK-Wales   | 3 | 5 | 0        | 0      |  |
| 29 | 2 UK | 2020-13 | 3 UK-Wales   | 3 | 5 | 0        | 0      |  |
| 30 | 2 UK | 2020-13 | 4 UK-Englan  | 1 | 1 | 1.191811 | #####  |  |
| 31 | 2 UK | 2020-13 | 4 UK-Englan  | 1 | 2 | 2.111543 | #####  |  |
| 32 | 2 UK | 2020-13 | 4 UK-Englan  | 1 | 3 | 1.600219 | #####  |  |
| 33 | 2 UK | 2020-13 | 4 UK-Englan  | 1 | 4 | 1.095591 | #####  |  |
| 34 | 2 UK | 2020-13 | 4 UK-Englan  | 1 | 5 | #####    | #####  |  |
| 35 | 2 UK | 2020-13 | 4 UK-Englan  | 2 | 1 | #####    | #####  |  |
| 36 | 2 UK | 2020-13 | 4 UK-Englan  | 2 | 2 | 1.728571 | #####  |  |
| 37 | 2 UK | 2020-13 | 4 UK-Englan  | 2 | 3 | #####    | #####  |  |
| 38 | 2 UK | 2020-13 | 4 UK-Englan  | 2 | 4 | 1.066826 | #####  |  |
| 39 | 2 UK | 2020-13 | 4 UK-Englan  | 2 | 5 | #####    | #####  |  |
| 40 | 2 UK | 2020-13 | 4 UK-Englan  | 3 | 1 | 1.51468  | #####  |  |
| 41 | 2 UK | 2020-13 | 4 UK-Englan  | 3 | 2 | 2.736842 | 1.2911 |  |
| 42 | 2 UK | 2020-13 | 4 UK-Englan  | 3 | 3 | 2.209091 | #####  |  |
| 43 | 2 UK | 2020-13 | 4 UK-Englan  | 3 | 4 | 1.125581 | #####  |  |
| 44 | 2 UK | 2020-13 | 4 UK-Englan  | 3 | 5 | #####    | #####  |  |
| 45 | 2 UK | 2020-13 | 4 UK-London  | 1 | 1 | #####    | #####  |  |
| 46 | 2 UK | 2020-13 | 4 UK-London  | 1 | 2 | #####    | #####  |  |
| 47 | 2 UK | 2020-13 | 4 UK-London  | 1 | 3 | #####    | #####  |  |
| 48 | 2 UK | 2020-13 | 4 UK-London  | 1 | 4 | #####    | #####  |  |
| 49 | 2 UK | 2020-13 | 4 UK-London  | 1 | 5 | 0        | 0      |  |
| 50 | 2 UK | 2020-13 | 4 UK-London  | 2 | 1 | #####    | #####  |  |
| 51 | 2 UK | 2020-13 | 4 UK-London  | 2 | 2 | #####    | #####  |  |
| 52 | 2 UK | 2020-13 | 4 UK-London  | 2 | 3 | 1.041667 | #####  |  |
| 53 | 2 UK | 2020-13 | 4 UK-London  | 2 | 4 | #####    | #####  |  |
| 54 | 2 UK | 2020-13 | 4 UK-London  | 2 | 5 | 0        | 0      |  |
| 55 | 2 UK | 2020-13 | 4 UK-London  | 3 | 1 | #####    | #####  |  |
| 56 | 2 UK | 2020-13 | 4 UK-London  | 3 | 2 | 0        | 0      |  |
| 57 | 2 UK | 2020-13 | 4 UK-London  | 3 | 3 | 0.72     | #####  |  |
| 58 | 2 UK | 2020-13 | 4 UK-London  | 3 | 4 | 0.796875 | #####  |  |
| 59 | 2 UK | 2020-13 | 4 UK-London  | 3 | 5 | 0        | 0      |  |
| 60 | 2 UK | 2020-13 | 4 UK-London  | 3 | 5 | 0        | 0      |  |

|    |      |         |              |   |   |          |          |  |
|----|------|---------|--------------|---|---|----------|----------|--|
| 1  |      |         |              |   |   |          |          |  |
| 2  |      |         |              |   |   |          |          |  |
| 3  | 2 UK | 2020-13 | 4 UK-Norther | 1 | 1 | 1.294253 | #####    |  |
| 4  | 2 UK | 2020-13 | 4 UK-Norther | 1 | 2 | 2.645393 | 1.606476 |  |
| 5  | 2 UK | 2020-13 | 4 UK-Norther | 1 | 3 | 1.095807 | #####    |  |
| 6  | 2 UK | 2020-13 | 4 UK-Norther | 1 | 4 | 1.625279 | #####    |  |
| 7  | 2 UK | 2020-13 | 4 UK-Norther | 1 | 5 | #####    | #####    |  |
| 8  | 2 UK | 2020-13 | 4 UK-Norther | 2 | 1 | 1.833305 | #####    |  |
| 9  | 2 UK | 2020-13 | 4 UK-Norther | 2 | 2 | 3.666667 | 2.120008 |  |
| 10 | 2 UK | 2020-13 | 4 UK-Norther | 2 | 3 | 1.910714 | #####    |  |
| 11 | 2 UK | 2020-13 | 4 UK-Norther | 2 | 4 | 1.597826 | #####    |  |
| 12 | 2 UK | 2020-13 | 4 UK-Norther | 2 | 5 | #####    | #####    |  |
| 13 | 2 UK | 2020-13 | 4 UK-Norther | 3 | 1 | #####    | #####    |  |
| 14 | 2 UK | 2020-13 | 4 UK-Norther | 3 | 2 | 0        | 0        |  |
| 15 | 2 UK | 2020-13 | 4 UK-Norther | 3 | 3 | 0        | 0        |  |
| 16 | 2 UK | 2020-13 | 4 UK-Norther | 3 | 4 | 1.666667 | #####    |  |
| 17 | 2 UK | 2020-13 | 4 UK-Norther | 3 | 5 | 0        | 0        |  |
| 18 | 2 UK | 2020-13 | 4 UK-Overall | 1 | 1 | 1.1049   | #####    |  |
| 19 | 2 UK | 2020-13 | 4 UK-Overall | 1 | 2 | 1.702065 | #####    |  |
| 20 | 2 UK | 2020-13 | 4 UK-Overall | 1 | 3 | 1.484432 | #####    |  |
| 21 | 2 UK | 2020-13 | 4 UK-Overall | 1 | 4 | 1.065087 | #####    |  |
| 22 | 2 UK | 2020-13 | 4 UK-Overall | 1 | 5 | #####    | #####    |  |
| 23 | 2 UK | 2020-13 | 4 UK-Overall | 2 | 1 | #####    | #####    |  |
| 24 | 2 UK | 2020-13 | 4 UK-Overall | 2 | 2 | 1.492899 | #####    |  |
| 25 | 2 UK | 2020-13 | 4 UK-Overall | 2 | 3 | 1.04127  | #####    |  |
| 26 | 2 UK | 2020-13 | 4 UK-Overall | 2 | 4 | 1.006804 | #####    |  |
| 27 | 2 UK | 2020-13 | 4 UK-Overall | 2 | 5 | #####    | #####    |  |
| 28 | 2 UK | 2020-13 | 4 UK-Overall | 3 | 1 | 1.355633 | #####    |  |
| 29 | 2 UK | 2020-13 | 4 UK-Overall | 3 | 2 | 2.000822 | #####    |  |
| 30 | 2 UK | 2020-13 | 4 UK-Overall | 3 | 3 | 1.948425 | #####    |  |
| 31 | 2 UK | 2020-13 | 4 UK-Overall | 3 | 4 | 1.128081 | #####    |  |
| 32 | 2 UK | 2020-13 | 4 UK-Overall | 3 | 5 | #####    | #####    |  |
| 33 | 2 UK | 2020-13 | 4 UK-Scotlan | 1 | 1 | 1.299764 | #####    |  |
| 34 | 2 UK | 2020-13 | 4 UK-Scotlan | 1 | 2 | 1.902604 | 1.234947 |  |
| 35 | 2 UK | 2020-13 | 4 UK-Scotlan | 1 | 3 | 1.702497 | #####    |  |
| 36 | 2 UK | 2020-13 | 4 UK-Scotlan | 1 | 4 | 1.365915 | #####    |  |
| 37 | 2 UK | 2020-13 | 4 UK-Scotlan | 1 | 5 | #####    | #####    |  |
| 38 | 2 UK | 2020-13 | 4 UK-Scotlan | 2 | 1 | #####    | #####    |  |
| 39 | 2 UK | 2020-13 | 4 UK-Scotlan | 2 | 2 | #####    | #####    |  |
| 40 | 2 UK | 2020-13 | 4 UK-Scotlan | 2 | 3 | 1.23913  | #####    |  |
| 41 | 2 UK | 2020-13 | 4 UK-Scotlan | 2 | 4 | 1.344086 | #####    |  |
| 42 | 2 UK | 2020-13 | 4 UK-Scotlan | 2 | 5 | #####    | #####    |  |
| 43 | 2 UK | 2020-13 | 4 UK-Scotlan | 3 | 1 | 1.717278 | #####    |  |
| 44 | 2 UK | 2020-13 | 4 UK-Scotlan | 3 | 2 | 4.375    | 2.855765 |  |
| 45 | 2 UK | 2020-13 | 4 UK-Scotlan | 3 | 3 | 2.178571 | #####    |  |
| 46 | 2 UK | 2020-13 | 4 UK-Scotlan | 3 | 4 | 1.392157 | #####    |  |
| 47 | 2 UK | 2020-13 | 4 UK-Scotlan | 3 | 5 | #####    | #####    |  |
| 48 | 2 UK | 2020-13 | 4 UK-Wales   | 1 | 1 | #####    | #####    |  |
| 49 | 2 UK | 2020-13 | 4 UK-Wales   | 1 | 2 | #####    | #####    |  |
| 50 | 2 UK | 2020-13 | 4 UK-Wales   | 1 | 3 | 1.621753 | #####    |  |
| 51 | 2 UK | 2020-13 | 4 UK-Wales   | 1 | 4 | 1.124531 | #####    |  |
| 52 | 2 UK | 2020-13 | 4 UK-Wales   | 1 | 5 | #####    | #####    |  |
| 53 | 2 UK | 2020-13 | 4 UK-Wales   | 2 | 1 | #####    | #####    |  |
| 54 | 2 UK | 2020-13 | 4 UK-Wales   | 2 | 2 | 0.875    | #####    |  |
| 55 | 2 UK | 2020-13 | 4 UK-Wales   | 2 | 3 | 1.054945 | #####    |  |
| 56 | 2 UK | 2020-13 | 4 UK-Wales   | 2 | 4 | #####    | #####    |  |
| 57 | 2 UK | 2020-13 | 4 UK-Wales   | 2 | 5 | #####    | #####    |  |
| 58 | 2 UK | 2020-13 | 4 UK-Wales   | 2 | 1 | 1.144867 | #####    |  |
| 59 | 2 UK | 2020-13 | 4 UK-Wales   | 3 |   |          |          |  |
| 60 | 2 UK | 2020-13 | 4 UK-Wales   | 3 |   |          |          |  |

|    |      |         |              |   |   |          |          |
|----|------|---------|--------------|---|---|----------|----------|
| 1  |      |         |              |   |   |          |          |
| 2  |      |         |              |   |   |          |          |
| 3  | 2 UK | 2020-13 | 4 UK-Wales   | 3 | 2 | 0        | 0        |
| 4  | 2 UK | 2020-13 | 4 UK-Wales   | 3 | 3 | 2.434783 | 1.204713 |
| 5  | 2 UK | 2020-13 | 4 UK-Wales   | 3 | 4 | 1.310811 | #####    |
| 6  | 2 UK | 2020-13 | 4 UK-Wales   | 3 | 5 | 0        | 0        |
| 7  | 2 UK | 2020-13 | 5 UK-England | 1 | 1 | #####    | #####    |
| 8  | 2 UK | 2020-13 | 5 UK-England | 1 | 2 | #####    | #####    |
| 9  | 2 UK | 2020-13 | 5 UK-England | 1 | 3 | #####    | #####    |
| 10 | 2 UK | 2020-13 | 5 UK-England | 1 | 4 | #####    | #####    |
| 11 | 2 UK | 2020-13 | 5 UK-England | 1 | 5 | #####    | #####    |
| 12 | 2 UK | 2020-13 | 5 UK-England | 2 | 1 | #####    | #####    |
| 13 | 2 UK | 2020-13 | 5 UK-England | 2 | 2 | #####    | #####    |
| 14 | 2 UK | 2020-13 | 5 UK-England | 2 | 3 | #####    | #####    |
| 15 | 2 UK | 2020-13 | 5 UK-England | 2 | 4 | #####    | #####    |
| 16 | 2 UK | 2020-13 | 5 UK-England | 2 | 5 | #####    | #####    |
| 17 | 2 UK | 2020-13 | 5 UK-England | 3 | 1 | #####    | #####    |
| 18 | 2 UK | 2020-13 | 5 UK-England | 3 | 2 | 0.2      | #####    |
| 19 | 2 UK | 2020-13 | 5 UK-England | 3 | 3 | #####    | #####    |
| 20 | 2 UK | 2020-13 | 5 UK-England | 3 | 4 | #####    | #####    |
| 21 | 2 UK | 2020-13 | 5 UK-England | 3 | 5 | #####    | #####    |
| 22 | 2 UK | 2020-13 | 5 UK-England | 3 | 5 | #####    | #####    |
| 23 | 2 UK | 2020-13 | 5 UK-London  | 1 | 1 | #####    | #####    |
| 24 | 2 UK | 2020-13 | 5 UK-London  | 1 | 2 | #####    | #####    |
| 25 | 2 UK | 2020-13 | 5 UK-London  | 1 | 3 | #####    | #####    |
| 26 | 2 UK | 2020-13 | 5 UK-London  | 1 | 4 | #####    | #####    |
| 27 | 2 UK | 2020-13 | 5 UK-London  | 1 | 5 | #####    | #####    |
| 28 | 2 UK | 2020-13 | 5 UK-London  | 2 | 1 | #####    | #####    |
| 29 | 2 UK | 2020-13 | 5 UK-London  | 2 | 2 | #####    | #####    |
| 30 | 2 UK | 2020-13 | 5 UK-London  | 2 | 3 | #####    | #####    |
| 31 | 2 UK | 2020-13 | 5 UK-London  | 2 | 4 | #####    | #####    |
| 32 | 2 UK | 2020-13 | 5 UK-London  | 2 | 5 | #####    | #####    |
| 33 | 2 UK | 2020-13 | 5 UK-London  | 3 | 1 | #####    | #####    |
| 34 | 2 UK | 2020-13 | 5 UK-London  | 3 | 2 | #####    | #####    |
| 35 | 2 UK | 2020-13 | 5 UK-London  | 3 | 3 | #####    | #####    |
| 36 | 2 UK | 2020-13 | 5 UK-London  | 3 | 4 | 1.031746 | #####    |
| 37 | 2 UK | 2020-13 | 5 UK-London  | 3 | 5 | #####    | #####    |
| 38 | 2 UK | 2020-13 | 5 UK-Norther | 1 | 1 | #####    | #####    |
| 39 | 2 UK | 2020-13 | 5 UK-Norther | 1 | 2 | 1.050719 | #####    |
| 40 | 2 UK | 2020-13 | 5 UK-Norther | 1 | 3 | #####    | #####    |
| 41 | 2 UK | 2020-13 | 5 UK-Norther | 1 | 4 | #####    | #####    |
| 42 | 2 UK | 2020-13 | 5 UK-Norther | 1 | 5 | #####    | #####    |
| 43 | 2 UK | 2020-13 | 5 UK-Norther | 2 | 1 | #####    | #####    |
| 44 | 2 UK | 2020-13 | 5 UK-Norther | 2 | 2 | #####    | #####    |
| 45 | 2 UK | 2020-13 | 5 UK-Norther | 2 | 3 | #####    | #####    |
| 46 | 2 UK | 2020-13 | 5 UK-Norther | 2 | 4 | #####    | #####    |
| 47 | 2 UK | 2020-13 | 5 UK-Norther | 2 | 5 | 0.6      | #####    |
| 48 | 2 UK | 2020-13 | 5 UK-Norther | 3 | 1 | #####    | #####    |
| 49 | 2 UK | 2020-13 | 5 UK-Norther | 3 | 2 | 2.333333 | 1.186422 |
| 50 | 2 UK | 2020-13 | 5 UK-Norther | 3 | 3 | #####    | #####    |
| 51 | 2 UK | 2020-13 | 5 UK-Norther | 3 | 4 | 1.185185 | #####    |
| 52 | 2 UK | 2020-13 | 5 UK-Norther | 3 | 5 | 1        | #####    |
| 53 | 2 UK | 2020-13 | 5 UK-Overall | 1 | 1 | #####    | #####    |
| 54 | 2 UK | 2020-13 | 5 UK-Overall | 1 | 2 | #####    | 0.08396  |
| 55 | 2 UK | 2020-13 | 5 UK-Overall | 1 | 3 | #####    | #####    |
| 56 | 2 UK | 2020-13 | 5 UK-Overall | 1 | 4 | #####    | #####    |
| 57 | 2 UK | 2020-13 | 5 UK-Overall | 1 | 5 | #####    | #####    |
| 58 | 2 UK | 2020-13 | 5 UK-Overall | 1 | 5 | #####    | #####    |
| 59 | 2 UK | 2020-13 | 5 UK-Overall | 2 | 1 | #####    | #####    |
| 60 | 2 UK | 2020-13 | 5 UK-Overall | 2 | 2 | #####    | #####    |

|    |      |         |              |   |   |          |          |
|----|------|---------|--------------|---|---|----------|----------|
| 1  |      |         |              |   |   |          |          |
| 2  |      |         |              |   |   |          |          |
| 3  | 2 UK | 2020-13 | 5 UK-Overall | 2 | 3 | #####    | #####    |
| 4  | 2 UK | 2020-13 | 5 UK-Overall | 2 | 4 | #####    | #####    |
| 5  | 2 UK | 2020-13 | 5 UK-Overall | 2 | 5 | #####    | #####    |
| 6  | 2 UK | 2020-13 | 5 UK-Overall | 3 | 1 | #####    | #####    |
| 7  | 2 UK | 2020-13 | 5 UK-Overall | 3 | 2 | #####    | #####    |
| 8  | 2 UK | 2020-13 | 5 UK-Overall | 3 | 3 | #####    | #####    |
| 9  | 2 UK | 2020-13 | 5 UK-Overall | 3 | 4 | #####    | #####    |
| 10 | 2 UK | 2020-13 | 5 UK-Overall | 3 | 5 | #####    | #####    |
| 11 | 2 UK | 2020-13 | 5 UK-Scotlan | 1 | 1 | #####    | #####    |
| 12 | 2 UK | 2020-13 | 5 UK-Scotlan | 1 | 2 | #####    | #####    |
| 13 | 2 UK | 2020-13 | 5 UK-Scotlan | 1 | 3 | #####    | #####    |
| 14 | 2 UK | 2020-13 | 5 UK-Scotlan | 1 | 4 | #####    | #####    |
| 15 | 2 UK | 2020-13 | 5 UK-Scotlan | 1 | 5 | #####    | #####    |
| 16 | 2 UK | 2020-13 | 5 UK-Scotlan | 2 | 1 | #####    | #####    |
| 17 | 2 UK | 2020-13 | 5 UK-Scotlan | 2 | 2 | #####    | #####    |
| 18 | 2 UK | 2020-13 | 5 UK-Scotlan | 2 | 3 | #####    | #####    |
| 19 | 2 UK | 2020-13 | 5 UK-Scotlan | 2 | 4 | #####    | #####    |
| 20 | 2 UK | 2020-13 | 5 UK-Scotlan | 2 | 5 | #####    | #####    |
| 21 | 2 UK | 2020-13 | 5 UK-Scotlan | 3 | 1 | #####    | #####    |
| 22 | 2 UK | 2020-13 | 5 UK-Scotlan | 3 | 2 | 0.2      | #####    |
| 23 | 2 UK | 2020-13 | 5 UK-Scotlan | 3 | 3 | #####    | #####    |
| 24 | 2 UK | 2020-13 | 5 UK-Scotlan | 3 | 4 | #####    | #####    |
| 25 | 2 UK | 2020-13 | 5 UK-Scotlan | 3 | 5 | #####    | #####    |
| 26 | 2 UK | 2020-13 | 5 UK-Scotlan | 3 | 5 | #####    | #####    |
| 27 | 2 UK | 2020-13 | 5 UK-Wales   | 1 | 1 | #####    | #####    |
| 28 | 2 UK | 2020-13 | 5 UK-Wales   | 1 | 2 | #####    | #####    |
| 29 | 2 UK | 2020-13 | 5 UK-Wales   | 1 | 3 | #####    | #####    |
| 30 | 2 UK | 2020-13 | 5 UK-Wales   | 1 | 4 | #####    | #####    |
| 31 | 2 UK | 2020-13 | 5 UK-Wales   | 1 | 5 | #####    | #####    |
| 32 | 2 UK | 2020-13 | 5 UK-Wales   | 2 | 1 | #####    | #####    |
| 33 | 2 UK | 2020-13 | 5 UK-Wales   | 2 | 2 | #####    | #####    |
| 34 | 2 UK | 2020-13 | 5 UK-Wales   | 2 | 3 | #####    | #####    |
| 35 | 2 UK | 2020-13 | 5 UK-Wales   | 2 | 4 | #####    | #####    |
| 36 | 2 UK | 2020-13 | 5 UK-Wales   | 2 | 5 | #####    | #####    |
| 37 | 2 UK | 2020-13 | 5 UK-Wales   | 3 | 1 | #####    | #####    |
| 38 | 2 UK | 2020-13 | 5 UK-Wales   | 3 | 2 | #####    | #####    |
| 39 | 2 UK | 2020-13 | 5 UK-Wales   | 3 | 3 | 1.125    | #####    |
| 40 | 2 UK | 2020-13 | 5 UK-Wales   | 3 | 4 | #####    | #####    |
| 41 | 2 UK | 2020-13 | 5 UK-Wales   | 3 | 5 | #####    | #####    |
| 42 | 2 UK | 2020-14 | 1 UK-Englan  | 1 | 1 | 2.548572 | #####    |
| 43 | 2 UK | 2020-14 | 1 UK-Englan  | 1 | 2 | 2.7921   | #####    |
| 44 | 2 UK | 2020-14 | 1 UK-Englan  | 1 | 3 | 3.236592 | #####    |
| 45 | 2 UK | 2020-14 | 1 UK-Englan  | 1 | 4 | 2.497425 | #####    |
| 46 | 2 UK | 2020-14 | 1 UK-Englan  | 1 | 5 | 1.696421 | #####    |
| 47 | 2 UK | 2020-14 | 1 UK-Englan  | 2 | 1 | 2.588628 | #####    |
| 48 | 2 UK | 2020-14 | 1 UK-Englan  | 2 | 2 | 2.96875  | #####    |
| 49 | 2 UK | 2020-14 | 1 UK-Englan  | 2 | 3 | 3.247525 | #####    |
| 50 | 2 UK | 2020-14 | 1 UK-Englan  | 2 | 4 | 2.378698 | #####    |
| 51 | 2 UK | 2020-14 | 1 UK-Englan  | 2 | 5 | 1.723214 | #####    |
| 52 | 2 UK | 2020-14 | 1 UK-Englan  | 3 | 1 | 2.499659 | #####    |
| 53 | 2 UK | 2020-14 | 1 UK-Englan  | 3 | 2 | 2.583333 | #####    |
| 54 | 2 UK | 2020-14 | 1 UK-Englan  | 3 | 3 | 3.217391 | #####    |
| 55 | 2 UK | 2020-14 | 1 UK-Englan  | 3 | 4 | 2.615385 | #####    |
| 56 | 2 UK | 2020-14 | 1 UK-Englan  | 3 | 5 | 1.666667 | #####    |
| 57 | 2 UK | 2020-14 | 1 UK-London  | 1 | 1 | 2.335228 | #####    |
| 58 | 2 UK | 2020-14 | 1 UK-London  | 1 | 2 | 2.83652  | 1.106494 |
| 59 | 2 UK | 2020-14 | 1 UK-London  | 1 | 3 | 1.35918  | #####    |
| 60 | 2 UK | 2020-14 | 1 UK-London  | 1 | 3 | 1.35918  | #####    |

|    |      |         |              |   |   |          |          |  |
|----|------|---------|--------------|---|---|----------|----------|--|
| 1  |      |         |              |   |   |          |          |  |
| 2  |      |         |              |   |   |          |          |  |
| 3  | 2 UK | 2020-14 | 1 UK-London  | 1 | 4 | 3.47899  | #####    |  |
| 4  | 2 UK | 2020-14 | 1 UK-London  | 1 | 5 | 1.788804 | #####    |  |
| 5  | 2 UK | 2020-14 | 1 UK-London  | 2 | 1 | 2.299339 | #####    |  |
| 6  | 2 UK | 2020-14 | 1 UK-London  | 2 | 2 | 3        | 1.62991  |  |
| 7  | 2 UK | 2020-14 | 1 UK-London  | 2 | 3 | 1.666667 | #####    |  |
| 8  | 2 UK | 2020-14 | 1 UK-London  | 2 | 4 | 3.05     | 1.219662 |  |
| 9  | 2 UK | 2020-14 | 1 UK-London  | 2 | 5 | 1.733333 | #####    |  |
| 10 | 2 UK | 2020-14 | 1 UK-London  | 3 | 1 | 2.378101 | #####    |  |
| 11 | 2 UK | 2020-14 | 1 UK-London  | 3 | 2 | 2.5      | #####    |  |
| 12 | 2 UK | 2020-14 | 1 UK-London  | 3 | 3 | 1        | #####    |  |
| 13 | 2 UK | 2020-14 | 1 UK-London  | 3 | 4 | 3.85     | 1.06138  |  |
| 14 | 2 UK | 2020-14 | 1 UK-London  | 3 | 5 | 1.875    | 1.006881 |  |
| 15 | 2 UK | 2020-14 | 1 UK-Norther | 1 | 1 | 2.576595 | #####    |  |
| 16 | 2 UK | 2020-14 | 1 UK-Norther | 1 | 2 | 3        | 0        |  |
| 17 | 2 UK | 2020-14 | 1 UK-Norther | 1 | 3 | 2.60053  | #####    |  |
| 18 | 2 UK | 2020-14 | 1 UK-Norther | 1 | 4 | 2.650413 | #####    |  |
| 19 | 2 UK | 2020-14 | 1 UK-Norther | 1 | 5 | 1.965242 | #####    |  |
| 20 | 2 UK | 2020-14 | 1 UK-Norther | 2 | 1 | 3.326364 | #####    |  |
| 21 | 2 UK | 2020-14 | 1 UK-Norther | 2 | 2 | 3        | 0        |  |
| 22 | 2 UK | 2020-14 | 1 UK-Norther | 2 | 3 | 4.266667 | 1.234647 |  |
| 23 | 2 UK | 2020-14 | 1 UK-Norther | 2 | 4 | 2.96     | #####    |  |
| 24 | 2 UK | 2020-14 | 1 UK-Norther | 2 | 5 | 1.666667 | #####    |  |
| 25 | 2 UK | 2020-14 | 1 UK-Norther | 3 | 1 | 1.682132 | #####    |  |
| 26 | 2 UK | 2020-14 | 1 UK-Norther | 3 | 2 | 3        | 4.44E-16 |  |
| 27 | 2 UK | 2020-14 | 1 UK-Norther | 3 | 3 | 0        | 0        |  |
| 28 | 2 UK | 2020-14 | 1 UK-Norther | 3 | 4 | 2.333333 | #####    |  |
| 29 | 2 UK | 2020-14 | 1 UK-Norther | 3 | 5 | 2.166667 | #####    |  |
| 30 | 2 UK | 2020-14 | 1 UK-Overall | 1 | 1 | 2.511593 | #####    |  |
| 31 | 2 UK | 2020-14 | 1 UK-Overall | 1 | 2 | 2.692686 | #####    |  |
| 32 | 2 UK | 2020-14 | 1 UK-Overall | 1 | 3 | 2.89281  | #####    |  |
| 33 | 2 UK | 2020-14 | 1 UK-Overall | 1 | 4 | 2.687763 | #####    |  |
| 34 | 2 UK | 2020-14 | 1 UK-Overall | 1 | 5 | 1.699785 | #####    |  |
| 35 | 2 UK | 2020-14 | 1 UK-Overall | 2 | 1 | 2.521698 | #####    |  |
| 36 | 2 UK | 2020-14 | 1 UK-Overall | 2 | 2 | 2.800442 | #####    |  |
| 37 | 2 UK | 2020-14 | 1 UK-Overall | 2 | 3 | 2.976775 | #####    |  |
| 38 | 2 UK | 2020-14 | 1 UK-Overall | 2 | 4 | 2.555577 | #####    |  |
| 39 | 2 UK | 2020-14 | 1 UK-Overall | 2 | 5 | 1.654889 | #####    |  |
| 40 | 2 UK | 2020-14 | 1 UK-Overall | 3 | 1 | 2.498591 | #####    |  |
| 41 | 2 UK | 2020-14 | 1 UK-Overall | 3 | 2 | 2.534336 | #####    |  |
| 42 | 2 UK | 2020-14 | 1 UK-Overall | 3 | 3 | 2.751755 | #####    |  |
| 43 | 2 UK | 2020-14 | 1 UK-Overall | 3 | 4 | 2.826462 | #####    |  |
| 44 | 2 UK | 2020-14 | 1 UK-Overall | 3 | 5 | 1.751893 | #####    |  |
| 45 | 2 UK | 2020-14 | 1 UK-Scotlan | 1 | 1 | 2.37776  | #####    |  |
| 46 | 2 UK | 2020-14 | 1 UK-Scotlan | 1 | 2 | 1.336931 | #####    |  |
| 47 | 2 UK | 2020-14 | 1 UK-Scotlan | 1 | 3 | 2.450194 | #####    |  |
| 48 | 2 UK | 2020-14 | 1 UK-Scotlan | 1 | 4 | 3.110275 | #####    |  |
| 49 | 2 UK | 2020-14 | 1 UK-Scotlan | 1 | 5 | 1.698729 | #####    |  |
| 50 | 2 UK | 2020-14 | 1 UK-Scotlan | 2 | 1 | 2.152373 | #####    |  |
| 51 | 2 UK | 2020-14 | 1 UK-Scotlan | 2 | 2 | 1.538462 | #####    |  |
| 52 | 2 UK | 2020-14 | 1 UK-Scotlan | 2 | 3 | 2.131579 | #####    |  |
| 53 | 2 UK | 2020-14 | 1 UK-Scotlan | 2 | 4 | 3.161765 | #####    |  |
| 54 | 2 UK | 2020-14 | 1 UK-Scotlan | 2 | 5 | 1.05     | #####    |  |
| 55 | 2 UK | 2020-14 | 1 UK-Scotlan | 3 | 1 | 2.742773 | #####    |  |
| 56 | 2 UK | 2020-14 | 1 UK-Scotlan | 3 | 2 | 0        | 0        |  |
| 57 | 2 UK | 2020-14 | 1 UK-Scotlan | 3 | 3 | 2.909091 | #####    |  |
| 58 | 2 UK | 2020-14 | 1 UK-Scotlan | 3 | 4 | 3.033333 | #####    |  |
| 59 | 2 UK | 2020-14 | 1 UK-Scotlan | 3 |   |          |          |  |
| 60 | 2 UK | 2020-14 | 1 UK-Scotlan | 3 |   |          |          |  |

|    |      |         |              |   |   |          |          |  |
|----|------|---------|--------------|---|---|----------|----------|--|
| 1  |      |         |              |   |   |          |          |  |
| 2  |      |         |              |   |   |          |          |  |
| 3  | 2 UK | 2020-14 | 1 UK-Scotlan | 3 | 5 | 2.541667 | #####    |  |
| 4  | 2 UK | 2020-14 | 1 UK-Wales   | 1 | 1 | 2.488962 | #####    |  |
| 5  | 2 UK | 2020-14 | 1 UK-Wales   | 1 | 2 | 2.3      | #####    |  |
| 6  | 2 UK | 2020-14 | 1 UK-Wales   | 1 | 3 | 2.696281 | #####    |  |
| 7  | 2 UK | 2020-14 | 1 UK-Wales   | 1 | 4 | 3.362995 | #####    |  |
| 8  | 2 UK | 2020-14 | 1 UK-Wales   | 1 | 5 | 1.583085 | #####    |  |
| 9  | 2 UK | 2020-14 | 1 UK-Wales   | 2 | 1 | 2.293409 | #####    |  |
| 10 | 2 UK | 2020-14 | 1 UK-Wales   | 2 | 2 | 2.3      | #####    |  |
| 11 | 2 UK | 2020-14 | 1 UK-Wales   | 2 | 3 | 2.448276 | #####    |  |
| 12 | 2 UK | 2020-14 | 1 UK-Wales   | 2 | 4 | 2.8125   | #####    |  |
| 13 | 2 UK | 2020-14 | 1 UK-Wales   | 2 | 5 | 1.55814  | #####    |  |
| 14 | 2 UK | 2020-14 | 1 UK-Wales   | 3 | 1 | 3.01756  | #####    |  |
| 15 | 2 UK | 2020-14 | 1 UK-Wales   | 3 | 2 | 0        | 0        |  |
| 16 | 2 UK | 2020-14 | 1 UK-Wales   | 3 | 3 | 4        | 2.828618 |  |
| 17 | 2 UK | 2020-14 | 1 UK-Wales   | 3 | 4 | 4.6      | 1.260773 |  |
| 18 | 2 UK | 2020-14 | 1 UK-Wales   | 3 | 5 | 1.619048 | #####    |  |
| 19 | 2 UK | 2020-14 | 2 UK-Englan  | 1 | 1 | 1.535169 | #####    |  |
| 20 | 2 UK | 2020-14 | 2 UK-Englan  | 1 | 2 | 2.120527 | #####    |  |
| 21 | 2 UK | 2020-14 | 2 UK-Englan  | 1 | 3 | 1.917401 | #####    |  |
| 22 | 2 UK | 2020-14 | 2 UK-Englan  | 1 | 4 | 1.350867 | #####    |  |
| 23 | 2 UK | 2020-14 | 2 UK-Englan  | 1 | 5 | #####    | #####    |  |
| 24 | 2 UK | 2020-14 | 2 UK-Englan  | 2 | 1 | 1.553454 | #####    |  |
| 25 | 2 UK | 2020-14 | 2 UK-Englan  | 2 | 2 | 2.090909 | #####    |  |
| 26 | 2 UK | 2020-14 | 2 UK-Englan  | 2 | 3 | 1.962617 | #####    |  |
| 27 | 2 UK | 2020-14 | 2 UK-Englan  | 2 | 4 | 1.336957 | #####    |  |
| 28 | 2 UK | 2020-14 | 2 UK-Englan  | 2 | 5 | #####    | #####    |  |
| 29 | 2 UK | 2020-14 | 2 UK-Englan  | 3 | 1 | 1.512531 | #####    |  |
| 30 | 2 UK | 2020-14 | 2 UK-Englan  | 3 | 2 | 2.153846 | #####    |  |
| 31 | 2 UK | 2020-14 | 2 UK-Englan  | 3 | 3 | 1.84     | #####    |  |
| 32 | 2 UK | 2020-14 | 2 UK-Englan  | 3 | 4 | 1.365591 | #####    |  |
| 33 | 2 UK | 2020-14 | 2 UK-Englan  | 3 | 5 | 1.012346 | #####    |  |
| 34 | 2 UK | 2020-14 | 2 UK-London  | 1 | 1 | 1.249881 | #####    |  |
| 35 | 2 UK | 2020-14 | 2 UK-London  | 1 | 2 | 1.57457  | #####    |  |
| 36 | 2 UK | 2020-14 | 2 UK-London  | 1 | 3 | 1.24639  | #####    |  |
| 37 | 2 UK | 2020-14 | 2 UK-London  | 1 | 4 | 1.314701 | #####    |  |
| 38 | 2 UK | 2020-14 | 2 UK-London  | 1 | 5 | #####    | #####    |  |
| 39 | 2 UK | 2020-14 | 2 UK-London  | 2 | 1 | 1.258045 | #####    |  |
| 40 | 2 UK | 2020-14 | 2 UK-London  | 2 | 2 | 1.125    | #####    |  |
| 41 | 2 UK | 2020-14 | 2 UK-London  | 2 | 3 | 1.6      | #####    |  |
| 42 | 2 UK | 2020-14 | 2 UK-London  | 2 | 4 | 1.238095 | #####    |  |
| 43 | 2 UK | 2020-14 | 2 UK-London  | 2 | 5 | #####    | #####    |  |
| 44 | 2 UK | 2020-14 | 2 UK-London  | 3 | 1 | 1.240181 | #####    |  |
| 45 | 2 UK | 2020-14 | 2 UK-London  | 3 | 2 | 2.5      | #####    |  |
| 46 | 2 UK | 2020-14 | 2 UK-London  | 3 | 3 | #####    | #####    |  |
| 47 | 2 UK | 2020-14 | 2 UK-London  | 3 | 4 | 1.380952 | #####    |  |
| 48 | 2 UK | 2020-14 | 2 UK-London  | 3 | 5 | 1        | #####    |  |
| 49 | 2 UK | 2020-14 | 2 UK-Norther | 1 | 1 | 1.490768 | #####    |  |
| 50 | 2 UK | 2020-14 | 2 UK-Norther | 1 | 2 | 3        | 0        |  |
| 51 | 2 UK | 2020-14 | 2 UK-Norther | 1 | 3 | 1.085915 | #####    |  |
| 52 | 2 UK | 2020-14 | 2 UK-Norther | 1 | 4 | 1.491275 | #####    |  |
| 53 | 2 UK | 2020-14 | 2 UK-Norther | 1 | 5 | 1.131908 | #####    |  |
| 54 | 2 UK | 2020-14 | 2 UK-Norther | 2 | 1 | 1.741633 | #####    |  |
| 55 | 2 UK | 2020-14 | 2 UK-Norther | 2 | 2 | 3        | 0        |  |
| 56 | 2 UK | 2020-14 | 2 UK-Norther | 2 | 3 | 1.8      | #####    |  |
| 57 | 2 UK | 2020-14 | 2 UK-Norther | 2 | 4 | 1.36     | #####    |  |
| 58 | 2 UK | 2020-14 | 2 UK-Norther | 2 | 5 | #####    | #####    |  |
| 59 | 2 UK | 2020-14 | 2 UK-Norther | 2 | 5 | #####    | #####    |  |
| 60 | 2 UK | 2020-14 | 2 UK-Norther | 2 | 5 | #####    | #####    |  |

|    |      |         |              |   |   |          |          |  |
|----|------|---------|--------------|---|---|----------|----------|--|
| 1  |      |         |              |   |   |          |          |  |
| 2  |      |         |              |   |   |          |          |  |
| 3  | 2 UK | 2020-14 | 2 UK-Norther | 3 | 1 | 1.226207 | #####    |  |
| 4  | 2 UK | 2020-14 | 2 UK-Norther | 3 | 2 | 3        | 4.44E-16 |  |
| 5  | 2 UK | 2020-14 | 2 UK-Norther | 3 | 3 | 0.25     | #####    |  |
| 6  | 2 UK | 2020-14 | 2 UK-Norther | 3 | 4 | 1.615385 | #####    |  |
| 7  | 2 UK | 2020-14 | 2 UK-Norther | 3 | 5 | 1.333333 | #####    |  |
| 8  | 2 UK | 2020-14 | 2 UK-Overall | 1 | 1 | 1.477958 | #####    |  |
| 9  | 2 UK | 2020-14 | 2 UK-Overall | 1 | 2 | 2.018027 | #####    |  |
| 10 | 2 UK | 2020-14 | 2 UK-Overall | 1 | 3 | 1.755941 | #####    |  |
| 11 | 2 UK | 2020-14 | 2 UK-Overall | 1 | 4 | 1.356291 | #####    |  |
| 12 | 2 UK | 2020-14 | 2 UK-Overall | 1 | 5 | #####    | #####    |  |
| 13 | 2 UK | 2020-14 | 2 UK-Overall | 2 | 1 | 1.497825 | #####    |  |
| 14 | 2 UK | 2020-14 | 2 UK-Overall | 2 | 2 | 1.933318 | #####    |  |
| 15 | 2 UK | 2020-14 | 2 UK-Overall | 2 | 3 | 1.86636  | #####    |  |
| 16 | 2 UK | 2020-14 | 2 UK-Overall | 2 | 4 | 1.321146 | #####    |  |
| 17 | 2 UK | 2020-14 | 2 UK-Overall | 2 | 5 | #####    | #####    |  |
| 18 | 2 UK | 2020-14 | 2 UK-Overall | 3 | 1 | 1.452242 | #####    |  |
| 19 | 2 UK | 2020-14 | 2 UK-Overall | 3 | 2 | 2.1352   | #####    |  |
| 20 | 2 UK | 2020-14 | 2 UK-Overall | 3 | 3 | 1.574829 | #####    |  |
| 21 | 2 UK | 2020-14 | 2 UK-Overall | 3 | 4 | 1.394996 | #####    |  |
| 22 | 2 UK | 2020-14 | 2 UK-Overall | 3 | 5 | 1.017836 | #####    |  |
| 23 | 2 UK | 2020-14 | 2 UK-Scotlan | 1 | 1 | 1.201145 | #####    |  |
| 24 | 2 UK | 2020-14 | 2 UK-Scotlan | 1 | 2 | 1.002386 | #####    |  |
| 25 | 2 UK | 2020-14 | 2 UK-Scotlan | 1 | 3 | 1.308636 | #####    |  |
| 26 | 2 UK | 2020-14 | 2 UK-Scotlan | 1 | 4 | 1.387087 | #####    |  |
| 27 | 2 UK | 2020-14 | 2 UK-Scotlan | 1 | 5 | #####    | #####    |  |
| 28 | 2 UK | 2020-14 | 2 UK-Scotlan | 2 | 1 | 1.191044 | #####    |  |
| 29 | 2 UK | 2020-14 | 2 UK-Scotlan | 2 | 2 | 1.153846 | #####    |  |
| 30 | 2 UK | 2020-14 | 2 UK-Scotlan | 2 | 3 | 1.390244 | #####    |  |
| 31 | 2 UK | 2020-14 | 2 UK-Scotlan | 2 | 4 | 1.253333 | #####    |  |
| 32 | 2 UK | 2020-14 | 2 UK-Scotlan | 2 | 5 | #####    | #####    |  |
| 33 | 2 UK | 2020-14 | 2 UK-Scotlan | 3 | 1 | 1.217586 | #####    |  |
| 34 | 2 UK | 2020-14 | 2 UK-Scotlan | 3 | 2 | 0.5      | #####    |  |
| 35 | 2 UK | 2020-14 | 2 UK-Scotlan | 3 | 3 | 1.181818 | #####    |  |
| 36 | 2 UK | 2020-14 | 2 UK-Scotlan | 3 | 4 | 1.59375  | #####    |  |
| 37 | 2 UK | 2020-14 | 2 UK-Scotlan | 3 | 5 | #####    | #####    |  |
| 38 | 2 UK | 2020-14 | 2 UK-Wales   | 1 | 1 | 1.502355 | #####    |  |
| 39 | 2 UK | 2020-14 | 2 UK-Wales   | 1 | 2 | 2.181818 | #####    |  |
| 40 | 2 UK | 2020-14 | 2 UK-Wales   | 1 | 3 | 1.751538 | #####    |  |
| 41 | 2 UK | 2020-14 | 2 UK-Wales   | 1 | 4 | 1.4057   | #####    |  |
| 42 | 2 UK | 2020-14 | 2 UK-Wales   | 1 | 5 | 1.1382   | #####    |  |
| 43 | 2 UK | 2020-14 | 2 UK-Wales   | 2 | 1 | 1.555006 | #####    |  |
| 44 | 2 UK | 2020-14 | 2 UK-Wales   | 2 | 2 | 2.181818 | #####    |  |
| 45 | 2 UK | 2020-14 | 2 UK-Wales   | 2 | 3 | 1.774194 | #####    |  |
| 46 | 2 UK | 2020-14 | 2 UK-Wales   | 2 | 4 | 1.347826 | #####    |  |
| 47 | 2 UK | 2020-14 | 2 UK-Wales   | 2 | 5 | 1.139535 | #####    |  |
| 48 | 2 UK | 2020-14 | 2 UK-Wales   | 3 | 1 | 1.369867 | #####    |  |
| 49 | 2 UK | 2020-14 | 2 UK-Wales   | 3 | 2 | 0        | 0        |  |
| 50 | 2 UK | 2020-14 | 2 UK-Wales   | 3 | 3 | 1.666667 | #####    |  |
| 51 | 2 UK | 2020-14 | 2 UK-Wales   | 3 | 4 | 1.529412 | #####    |  |
| 52 | 2 UK | 2020-14 | 2 UK-Wales   | 3 | 5 | 1.136364 | #####    |  |
| 53 | 2 UK | 2020-14 | 3 UK-Englan  | 1 | 1 | 0        | 0        |  |
| 54 | 2 UK | 2020-14 | 3 UK-Englan  | 1 | 2 | 0        | 0        |  |
| 55 | 2 UK | 2020-14 | 3 UK-Englan  | 1 | 3 | 0        | 0        |  |
| 56 | 2 UK | 2020-14 | 3 UK-Englan  | 1 | 4 | 0        | 0        |  |
| 57 | 2 UK | 2020-14 | 3 UK-Englan  | 1 | 5 | 0        | 0        |  |
| 58 | 2 UK | 2020-14 | 3 UK-Englan  | 2 | 1 | 0        | 0        |  |
| 59 | 2 UK | 2020-14 | 3 UK-Englan  | 2 |   |          |          |  |
| 60 | 2 UK | 2020-14 | 3 UK-Englan  | 2 |   |          |          |  |

|    |      |         |               |   |   |   |   |
|----|------|---------|---------------|---|---|---|---|
| 1  |      |         |               |   |   |   |   |
| 2  |      |         |               |   |   |   |   |
| 3  | 2 UK | 2020-14 | 3 UK-England  | 2 | 2 | 0 | 0 |
| 4  | 2 UK | 2020-14 | 3 UK-England  | 2 | 3 | 0 | 0 |
| 5  | 2 UK | 2020-14 | 3 UK-England  | 2 | 4 | 0 | 0 |
| 6  | 2 UK | 2020-14 | 3 UK-England  | 2 | 5 | 0 | 0 |
| 7  | 2 UK | 2020-14 | 3 UK-England  | 3 | 1 | 0 | 0 |
| 8  | 2 UK | 2020-14 | 3 UK-England  | 3 | 2 | 0 | 0 |
| 9  | 2 UK | 2020-14 | 3 UK-England  | 3 | 3 | 0 | 0 |
| 10 | 2 UK | 2020-14 | 3 UK-England  | 3 | 4 | 0 | 0 |
| 11 | 2 UK | 2020-14 | 3 UK-England  | 3 | 5 | 0 | 0 |
| 12 | 2 UK | 2020-14 | 3 UK-London   | 1 | 1 | 0 | 0 |
| 13 | 2 UK | 2020-14 | 3 UK-London   | 1 | 2 | 0 | 0 |
| 14 | 2 UK | 2020-14 | 3 UK-London   | 1 | 3 | 0 | 0 |
| 15 | 2 UK | 2020-14 | 3 UK-London   | 1 | 4 | 0 | 0 |
| 16 | 2 UK | 2020-14 | 3 UK-London   | 1 | 5 | 0 | 0 |
| 17 | 2 UK | 2020-14 | 3 UK-London   | 2 | 1 | 0 | 0 |
| 18 | 2 UK | 2020-14 | 3 UK-London   | 2 | 2 | 0 | 0 |
| 19 | 2 UK | 2020-14 | 3 UK-London   | 2 | 3 | 0 | 0 |
| 20 | 2 UK | 2020-14 | 3 UK-London   | 2 | 4 | 0 | 0 |
| 21 | 2 UK | 2020-14 | 3 UK-London   | 2 | 5 | 0 | 0 |
| 22 | 2 UK | 2020-14 | 3 UK-London   | 3 | 1 | 0 | 0 |
| 23 | 2 UK | 2020-14 | 3 UK-London   | 3 | 2 | 0 | 0 |
| 24 | 2 UK | 2020-14 | 3 UK-London   | 3 | 3 | 0 | 0 |
| 25 | 2 UK | 2020-14 | 3 UK-London   | 3 | 4 | 0 | 0 |
| 26 | 2 UK | 2020-14 | 3 UK-London   | 3 | 5 | 0 | 0 |
| 27 | 2 UK | 2020-14 | 3 UK-Norther  | 1 | 1 | 0 | 0 |
| 28 | 2 UK | 2020-14 | 3 UK-Norther  | 1 | 2 | 0 | 0 |
| 29 | 2 UK | 2020-14 | 3 UK-Norther  | 1 | 3 | 0 | 0 |
| 30 | 2 UK | 2020-14 | 3 UK-Norther  | 1 | 4 | 0 | 0 |
| 31 | 2 UK | 2020-14 | 3 UK-Norther  | 1 | 5 | 0 | 0 |
| 32 | 2 UK | 2020-14 | 3 UK-Norther  | 2 | 1 | 0 | 0 |
| 33 | 2 UK | 2020-14 | 3 UK-Norther  | 2 | 2 | 0 | 0 |
| 34 | 2 UK | 2020-14 | 3 UK-Norther  | 2 | 3 | 0 | 0 |
| 35 | 2 UK | 2020-14 | 3 UK-Norther  | 2 | 4 | 0 | 0 |
| 36 | 2 UK | 2020-14 | 3 UK-Norther  | 2 | 5 | 0 | 0 |
| 37 | 2 UK | 2020-14 | 3 UK-Norther  | 3 | 1 | 0 | 0 |
| 38 | 2 UK | 2020-14 | 3 UK-Norther  | 3 | 2 | 0 | 0 |
| 39 | 2 UK | 2020-14 | 3 UK-Norther  | 3 | 3 | 0 | 0 |
| 40 | 2 UK | 2020-14 | 3 UK-Norther  | 3 | 4 | 0 | 0 |
| 41 | 2 UK | 2020-14 | 3 UK-Norther  | 3 | 5 | 0 | 0 |
| 42 | 2 UK | 2020-14 | 3 UK-Overall  | 1 | 1 | 0 | 0 |
| 43 | 2 UK | 2020-14 | 3 UK-Overall  | 1 | 2 | 0 | 0 |
| 44 | 2 UK | 2020-14 | 3 UK-Overall  | 1 | 3 | 0 | 0 |
| 45 | 2 UK | 2020-14 | 3 UK-Overall  | 1 | 4 | 0 | 0 |
| 46 | 2 UK | 2020-14 | 3 UK-Overall  | 1 | 5 | 0 | 0 |
| 47 | 2 UK | 2020-14 | 3 UK-Overall  | 2 | 1 | 0 | 0 |
| 48 | 2 UK | 2020-14 | 3 UK-Overall  | 2 | 2 | 0 | 0 |
| 49 | 2 UK | 2020-14 | 3 UK-Overall  | 2 | 3 | 0 | 0 |
| 50 | 2 UK | 2020-14 | 3 UK-Overall  | 2 | 4 | 0 | 0 |
| 51 | 2 UK | 2020-14 | 3 UK-Overall  | 2 | 5 | 0 | 0 |
| 52 | 2 UK | 2020-14 | 3 UK-Overall  | 3 | 1 | 0 | 0 |
| 53 | 2 UK | 2020-14 | 3 UK-Overall  | 3 | 2 | 0 | 0 |
| 54 | 2 UK | 2020-14 | 3 UK-Overall  | 3 | 3 | 0 | 0 |
| 55 | 2 UK | 2020-14 | 3 UK-Overall  | 3 | 4 | 0 | 0 |
| 56 | 2 UK | 2020-14 | 3 UK-Overall  | 3 | 5 | 0 | 0 |
| 57 | 2 UK | 2020-14 | 3 UK-Scotland | 1 | 1 | 0 | 0 |
| 58 | 2 UK | 2020-14 | 3 UK-Scotland | 1 | 2 | 0 | 0 |
| 59 | 2 UK | 2020-14 | 3 UK-Scotland | 1 | 2 | 0 | 0 |
| 60 | 2 UK | 2020-14 | 3 UK-Scotland | 1 | 2 | 0 | 0 |



|    |      |         |              |   |   |          |          |  |
|----|------|---------|--------------|---|---|----------|----------|--|
| 1  |      |         |              |   |   |          |          |  |
| 2  |      |         |              |   |   |          |          |  |
| 3  | 2 UK | 2020-14 | 3 UK-Scotlan | 1 | 3 | 0        | 0        |  |
| 4  | 2 UK | 2020-14 | 3 UK-Scotlan | 1 | 4 | 0        | 0        |  |
| 5  | 2 UK | 2020-14 | 3 UK-Scotlan | 1 | 5 | 0        | 0        |  |
| 6  | 2 UK | 2020-14 | 3 UK-Scotlan | 2 | 1 | 0        | 0        |  |
| 7  | 2 UK | 2020-14 | 3 UK-Scotlan | 2 | 2 | 0        | 0        |  |
| 8  | 2 UK | 2020-14 | 3 UK-Scotlan | 2 | 3 | 0        | 0        |  |
| 9  | 2 UK | 2020-14 | 3 UK-Scotlan | 2 | 4 | 0        | 0        |  |
| 10 | 2 UK | 2020-14 | 3 UK-Scotlan | 2 | 5 | 0        | 0        |  |
| 11 | 2 UK | 2020-14 | 3 UK-Scotlan | 3 | 1 | 0        | 0        |  |
| 12 | 2 UK | 2020-14 | 3 UK-Scotlan | 3 | 2 | 0        | 0        |  |
| 13 | 2 UK | 2020-14 | 3 UK-Scotlan | 3 | 3 | 0        | 0        |  |
| 14 | 2 UK | 2020-14 | 3 UK-Scotlan | 3 | 4 | 0        | 0        |  |
| 15 | 2 UK | 2020-14 | 3 UK-Scotlan | 3 | 5 | 0        | 0        |  |
| 16 | 2 UK | 2020-14 | 3 UK-Wales   | 1 | 1 | 0        | 0        |  |
| 17 | 2 UK | 2020-14 | 3 UK-Wales   | 1 | 2 | 0        | 0        |  |
| 18 | 2 UK | 2020-14 | 3 UK-Wales   | 1 | 3 | 0        | 0        |  |
| 19 | 2 UK | 2020-14 | 3 UK-Wales   | 1 | 4 | 0        | 0        |  |
| 20 | 2 UK | 2020-14 | 3 UK-Wales   | 1 | 5 | 0        | 0        |  |
| 21 | 2 UK | 2020-14 | 3 UK-Wales   | 2 | 1 | 0        | 0        |  |
| 22 | 2 UK | 2020-14 | 3 UK-Wales   | 2 | 2 | 0        | 0        |  |
| 23 | 2 UK | 2020-14 | 3 UK-Wales   | 2 | 3 | 0        | 0        |  |
| 24 | 2 UK | 2020-14 | 3 UK-Wales   | 2 | 4 | 0        | 0        |  |
| 25 | 2 UK | 2020-14 | 3 UK-Wales   | 2 | 5 | 0        | 0        |  |
| 26 | 2 UK | 2020-14 | 3 UK-Wales   | 3 | 1 | 0        | 0        |  |
| 27 | 2 UK | 2020-14 | 3 UK-Wales   | 3 | 2 | 0        | 0        |  |
| 28 | 2 UK | 2020-14 | 3 UK-Wales   | 3 | 3 | 0        | 0        |  |
| 29 | 2 UK | 2020-14 | 3 UK-Wales   | 3 | 4 | 0        | 0        |  |
| 30 | 2 UK | 2020-14 | 3 UK-Wales   | 3 | 5 | 0        | 0        |  |
| 31 | 2 UK | 2020-14 | 4 UK-Englan  | 1 | 1 | #####    | #####    |  |
| 32 | 2 UK | 2020-14 | 4 UK-Englan  | 1 | 2 | #####    | #####    |  |
| 33 | 2 UK | 2020-14 | 4 UK-Englan  | 1 | 3 | #####    | #####    |  |
| 34 | 2 UK | 2020-14 | 4 UK-Englan  | 1 | 4 | #####    | #####    |  |
| 35 | 2 UK | 2020-14 | 4 UK-Englan  | 1 | 5 | #####    | #####    |  |
| 36 | 2 UK | 2020-14 | 4 UK-Englan  | 2 | 1 | #####    | #####    |  |
| 37 | 2 UK | 2020-14 | 4 UK-Englan  | 2 | 2 | #####    | #####    |  |
| 38 | 2 UK | 2020-14 | 4 UK-Englan  | 2 | 3 | #####    | #####    |  |
| 39 | 2 UK | 2020-14 | 4 UK-Englan  | 2 | 4 | #####    | #####    |  |
| 40 | 2 UK | 2020-14 | 4 UK-Englan  | 2 | 5 | #####    | #####    |  |
| 41 | 2 UK | 2020-14 | 4 UK-Englan  | 3 | 1 | #####    | #####    |  |
| 42 | 2 UK | 2020-14 | 4 UK-Englan  | 3 | 2 | #####    | #####    |  |
| 43 | 2 UK | 2020-14 | 4 UK-Englan  | 3 | 3 | 0.56     | #####    |  |
| 44 | 2 UK | 2020-14 | 4 UK-Englan  | 3 | 4 | 0.71875  | #####    |  |
| 45 | 2 UK | 2020-14 | 4 UK-Englan  | 3 | 5 | #####    | #####    |  |
| 46 | 2 UK | 2020-14 | 4 UK-London  | 1 | 1 | #####    | #####    |  |
| 47 | 2 UK | 2020-14 | 4 UK-London  | 1 | 2 | 1.09369  | 1.061466 |  |
| 48 | 2 UK | 2020-14 | 4 UK-London  | 1 | 3 | 0        | 0        |  |
| 49 | 2 UK | 2020-14 | 4 UK-London  | 1 | 4 | 1.435474 | #####    |  |
| 50 | 2 UK | 2020-14 | 4 UK-London  | 1 | 5 | 0        | 0        |  |
| 51 | 2 UK | 2020-14 | 4 UK-London  | 2 | 1 | #####    | #####    |  |
| 52 | 2 UK | 2020-14 | 4 UK-London  | 2 | 2 | 1.625    | 1.520151 |  |
| 53 | 2 UK | 2020-14 | 4 UK-London  | 2 | 3 | 0        | 0        |  |
| 54 | 2 UK | 2020-14 | 4 UK-London  | 2 | 4 | 1.333333 | #####    |  |
| 55 | 2 UK | 2020-14 | 4 UK-London  | 2 | 5 | 0        | 0        |  |
| 56 | 2 UK | 2020-14 | 4 UK-London  | 3 | 1 | #####    | #####    |  |
| 57 | 2 UK | 2020-14 | 4 UK-London  | 3 | 2 | 0        | 0        |  |
| 58 | 2 UK | 2020-14 | 4 UK-London  | 3 | 3 | 0        | 0        |  |
| 59 | 2 UK | 2020-14 | 4 UK-London  | 3 | 3 | 0        | 0        |  |
| 60 | 2 UK | 2020-14 | 4 UK-London  | 3 | 3 | 0        | 0        |  |

|    |      |         |              |   |   |          |          |
|----|------|---------|--------------|---|---|----------|----------|
| 1  |      |         |              |   |   |          |          |
| 2  |      |         |              |   |   |          |          |
| 3  | 2 UK | 2020-14 | 4 UK-London  | 3 | 4 | 1.52381  | 1.016083 |
| 4  | 2 UK | 2020-14 | 4 UK-London  | 3 | 5 | 0        | 0        |
| 5  | 2 UK | 2020-14 | 4 UK-Norther | 1 | 1 | #####    | #####    |
| 6  | 2 UK | 2020-14 | 4 UK-Norther | 1 | 2 | 0        | 0        |
| 7  | 2 UK | 2020-14 | 4 UK-Norther | 1 | 3 | #####    | #####    |
| 8  | 2 UK | 2020-14 | 4 UK-Norther | 1 | 4 | #####    | #####    |
| 9  | 2 UK | 2020-14 | 4 UK-Norther | 1 | 5 | 0        | 0        |
| 10 | 2 UK | 2020-14 | 4 UK-Norther | 2 | 1 | #####    | #####    |
| 11 | 2 UK | 2020-14 | 4 UK-Norther | 2 | 2 | 0        | 0        |
| 12 | 2 UK | 2020-14 | 4 UK-Norther | 2 | 3 | 1.5      | 1.12293  |
| 13 | 2 UK | 2020-14 | 4 UK-Norther | 2 | 4 | 1.038462 | #####    |
| 14 | 2 UK | 2020-14 | 4 UK-Norther | 2 | 5 | 0        | 0        |
| 15 | 2 UK | 2020-14 | 4 UK-Norther | 3 | 1 | #####    | #####    |
| 16 | 2 UK | 2020-14 | 4 UK-Norther | 3 | 2 | 0        | 0        |
| 17 | 2 UK | 2020-14 | 4 UK-Norther | 3 | 3 | 0        | 0        |
| 18 | 2 UK | 2020-14 | 4 UK-Norther | 3 | 4 | #####    | #####    |
| 19 | 2 UK | 2020-14 | 4 UK-Norther | 3 | 5 | 0        | 0        |
| 20 | 2 UK | 2020-14 | 4 UK-Overall | 1 | 1 | #####    | #####    |
| 21 | 2 UK | 2020-14 | 4 UK-Overall | 1 | 2 | #####    | #####    |
| 22 | 2 UK | 2020-14 | 4 UK-Overall | 1 | 3 | #####    | #####    |
| 23 | 2 UK | 2020-14 | 4 UK-Overall | 1 | 4 | #####    | #####    |
| 24 | 2 UK | 2020-14 | 4 UK-Overall | 1 | 5 | #####    | #####    |
| 25 | 2 UK | 2020-14 | 4 UK-Overall | 2 | 1 | #####    | #####    |
| 26 | 2 UK | 2020-14 | 4 UK-Overall | 2 | 2 | #####    | #####    |
| 27 | 2 UK | 2020-14 | 4 UK-Overall | 2 | 3 | #####    | #####    |
| 28 | 2 UK | 2020-14 | 4 UK-Overall | 2 | 4 | #####    | #####    |
| 29 | 2 UK | 2020-14 | 4 UK-Overall | 2 | 5 | #####    | #####    |
| 30 | 2 UK | 2020-14 | 4 UK-Overall | 3 | 1 | #####    | #####    |
| 31 | 2 UK | 2020-14 | 4 UK-Overall | 3 | 2 | #####    | #####    |
| 32 | 2 UK | 2020-14 | 4 UK-Overall | 3 | 3 | #####    | #####    |
| 33 | 2 UK | 2020-14 | 4 UK-Overall | 3 | 4 | #####    | #####    |
| 34 | 2 UK | 2020-14 | 4 UK-Overall | 3 | 5 | #####    | #####    |
| 35 | 2 UK | 2020-14 | 4 UK-Overall | 3 | 5 | #####    | #####    |
| 36 | 2 UK | 2020-14 | 4 UK-Scotlan | 1 | 1 | #####    | #####    |
| 37 | 2 UK | 2020-14 | 4 UK-Scotlan | 1 | 2 | 0        | 0        |
| 38 | 2 UK | 2020-14 | 4 UK-Scotlan | 1 | 3 | #####    | #####    |
| 39 | 2 UK | 2020-14 | 4 UK-Scotlan | 1 | 4 | #####    | #####    |
| 40 | 2 UK | 2020-14 | 4 UK-Scotlan | 1 | 5 | #####    | #####    |
| 41 | 2 UK | 2020-14 | 4 UK-Scotlan | 2 | 1 | #####    | #####    |
| 42 | 2 UK | 2020-14 | 4 UK-Scotlan | 2 | 2 | 0        | 0        |
| 43 | 2 UK | 2020-14 | 4 UK-Scotlan | 2 | 3 | 0.875    | #####    |
| 44 | 2 UK | 2020-14 | 4 UK-Scotlan | 2 | 4 | 1.205479 | #####    |
| 45 | 2 UK | 2020-14 | 4 UK-Scotlan | 2 | 5 | 0        | 0        |
| 46 | 2 UK | 2020-14 | 4 UK-Scotlan | 3 | 1 | #####    | #####    |
| 47 | 2 UK | 2020-14 | 4 UK-Scotlan | 3 | 2 | 0        | 0        |
| 48 | 2 UK | 2020-14 | 4 UK-Scotlan | 3 | 3 | 1        | #####    |
| 49 | 2 UK | 2020-14 | 4 UK-Scotlan | 3 | 4 | #####    | #####    |
| 50 | 2 UK | 2020-14 | 4 UK-Scotlan | 3 | 5 | #####    | #####    |
| 51 | 2 UK | 2020-14 | 4 UK-Wales   | 1 | 1 | #####    | #####    |
| 52 | 2 UK | 2020-14 | 4 UK-Wales   | 1 | 2 | 0        | 0        |
| 53 | 2 UK | 2020-14 | 4 UK-Wales   | 1 | 3 | #####    | #####    |
| 54 | 2 UK | 2020-14 | 4 UK-Wales   | 1 | 4 | 1.513731 | #####    |
| 55 | 2 UK | 2020-14 | 4 UK-Wales   | 1 | 5 | #####    | #####    |
| 56 | 2 UK | 2020-14 | 4 UK-Wales   | 2 | 1 | #####    | #####    |
| 57 | 2 UK | 2020-14 | 4 UK-Wales   | 2 | 2 | 0        | 0        |
| 58 | 2 UK | 2020-14 | 4 UK-Wales   | 2 | 3 | #####    | #####    |
| 59 | 2 UK | 2020-14 | 4 UK-Wales   | 2 | 4 | 1.184615 | #####    |
| 60 | 2 UK | 2020-14 | 4 UK-Wales   | 2 | 4 | 1.184615 | #####    |

|    |      |         |              |   |   |          |          |
|----|------|---------|--------------|---|---|----------|----------|
| 1  |      |         |              |   |   |          |          |
| 2  |      |         |              |   |   |          |          |
| 3  | 2 UK | 2020-14 | 4 UK-Wales   | 2 | 5 | #####    | #####    |
| 4  | 2 UK | 2020-14 | 4 UK-Wales   | 3 | 1 | #####    | #####    |
| 5  | 2 UK | 2020-14 | 4 UK-Wales   | 3 | 2 | 0        | 0        |
| 6  | 2 UK | 2020-14 | 4 UK-Wales   | 3 | 3 | 2        | 1.414309 |
| 7  | 2 UK | 2020-14 | 4 UK-Wales   | 3 | 4 | 2.176471 | 1.116903 |
| 8  | 2 UK | 2020-14 | 4 UK-Wales   | 3 | 5 | 0        | 0        |
| 9  | 2 UK | 2020-14 | 5 UK-England | 1 | 1 | #####    | #####    |
| 10 | 2 UK | 2020-14 | 5 UK-England | 1 | 2 | #####    | #####    |
| 11 | 2 UK | 2020-14 | 5 UK-England | 1 | 3 | #####    | #####    |
| 12 | 2 UK | 2020-14 | 5 UK-England | 1 | 4 | #####    | #####    |
| 13 | 2 UK | 2020-14 | 5 UK-England | 1 | 5 | #####    | #####    |
| 14 | 2 UK | 2020-14 | 5 UK-England | 2 | 1 | #####    | #####    |
| 15 | 2 UK | 2020-14 | 5 UK-England | 2 | 2 | #####    | #####    |
| 16 | 2 UK | 2020-14 | 5 UK-England | 2 | 3 | #####    | #####    |
| 17 | 2 UK | 2020-14 | 5 UK-England | 2 | 4 | #####    | #####    |
| 18 | 2 UK | 2020-14 | 5 UK-England | 2 | 5 | #####    | #####    |
| 19 | 2 UK | 2020-14 | 5 UK-England | 3 | 1 | #####    | #####    |
| 20 | 2 UK | 2020-14 | 5 UK-England | 3 | 2 | #####    | #####    |
| 21 | 2 UK | 2020-14 | 5 UK-England | 3 | 3 | #####    | #####    |
| 22 | 2 UK | 2020-14 | 5 UK-England | 3 | 4 | #####    | #####    |
| 23 | 2 UK | 2020-14 | 5 UK-England | 3 | 5 | #####    | #####    |
| 24 | 2 UK | 2020-14 | 5 UK-England | 3 | 5 | #####    | #####    |
| 25 | 2 UK | 2020-14 | 5 UK-London  | 1 | 1 | #####    | #####    |
| 26 | 2 UK | 2020-14 | 5 UK-London  | 1 | 2 | #####    | #####    |
| 27 | 2 UK | 2020-14 | 5 UK-London  | 1 | 3 | #####    | #####    |
| 28 | 2 UK | 2020-14 | 5 UK-London  | 1 | 4 | #####    | #####    |
| 29 | 2 UK | 2020-14 | 5 UK-London  | 1 | 5 | #####    | #####    |
| 30 | 2 UK | 2020-14 | 5 UK-London  | 2 | 1 | #####    | #####    |
| 31 | 2 UK | 2020-14 | 5 UK-London  | 2 | 2 | 0.25     | #####    |
| 32 | 2 UK | 2020-14 | 5 UK-London  | 2 | 3 | #####    | #####    |
| 33 | 2 UK | 2020-14 | 5 UK-London  | 2 | 4 | 0.45     | #####    |
| 34 | 2 UK | 2020-14 | 5 UK-London  | 2 | 5 | 1        | #####    |
| 35 | 2 UK | 2020-14 | 5 UK-London  | 3 | 1 | #####    | #####    |
| 36 | 2 UK | 2020-14 | 5 UK-London  | 3 | 2 | 0        | 0        |
| 37 | 2 UK | 2020-14 | 5 UK-London  | 3 | 3 | #####    | #####    |
| 38 | 2 UK | 2020-14 | 5 UK-London  | 3 | 4 | 0.85     | #####    |
| 39 | 2 UK | 2020-14 | 5 UK-London  | 3 | 5 | 0.875    | #####    |
| 40 | 2 UK | 2020-14 | 5 UK-Norther | 1 | 1 | #####    | #####    |
| 41 | 2 UK | 2020-14 | 5 UK-Norther | 1 | 2 | 1.07329  | #####    |
| 42 | 2 UK | 2020-14 | 5 UK-Norther | 1 | 3 | #####    | #####    |
| 43 | 2 UK | 2020-14 | 5 UK-Norther | 1 | 4 | #####    | #####    |
| 44 | 2 UK | 2020-14 | 5 UK-Norther | 1 | 5 | #####    | #####    |
| 45 | 2 UK | 2020-14 | 5 UK-Norther | 2 | 1 | #####    | #####    |
| 46 | 2 UK | 2020-14 | 5 UK-Norther | 2 | 2 | 0        | 0        |
| 47 | 2 UK | 2020-14 | 5 UK-Norther | 2 | 3 | #####    | #####    |
| 48 | 2 UK | 2020-14 | 5 UK-Norther | 2 | 4 | 0.5      | #####    |
| 49 | 2 UK | 2020-14 | 5 UK-Norther | 2 | 5 | #####    | #####    |
| 50 | 2 UK | 2020-14 | 5 UK-Norther | 3 | 1 | #####    | #####    |
| 51 | 2 UK | 2020-14 | 5 UK-Norther | 3 | 2 | 2        | 1.414309 |
| 52 | 2 UK | 2020-14 | 5 UK-Norther | 3 | 3 | 0        | 0        |
| 53 | 2 UK | 2020-14 | 5 UK-Norther | 3 | 4 | 0.6875   | #####    |
| 54 | 2 UK | 2020-14 | 5 UK-Norther | 3 | 5 | #####    | #####    |
| 55 | 2 UK | 2020-14 | 5 UK-Overall | 1 | 1 | #####    | #####    |
| 56 | 2 UK | 2020-14 | 5 UK-Overall | 1 | 2 | #####    | #####    |
| 57 | 2 UK | 2020-14 | 5 UK-Overall | 1 | 3 | #####    | #####    |
| 58 | 2 UK | 2020-14 | 5 UK-Overall | 1 | 4 | #####    | #####    |
| 59 | 2 UK | 2020-14 | 5 UK-Overall | 1 | 5 | #####    | #####    |
| 60 | 2 UK | 2020-14 | 5 UK-Overall | 1 | 5 | #####    | #####    |

1  
2  
3  
4  
5  
6  
7  
8  
9  
10  
11  
12  
13  
14  
15  
16  
17  
18  
19  
20  
21  
22  
23  
24  
25  
26  
27  
28  
29  
30  
31  
32  
33  
34  
35  
36  
37  
38  
39  
40  
41  
42  
43  
44  
45  
46  
47  
48  
49  
50  
51  
52  
53  
54  
55  
56  
57  
58  
59  
60

|      |         |              |   |   |          |          |
|------|---------|--------------|---|---|----------|----------|
| 2 UK | 2020-14 | 5 UK-Overall | 2 | 1 | #####    | #####    |
| 2 UK | 2020-14 | 5 UK-Overall | 2 | 2 | #####    | #####    |
| 2 UK | 2020-14 | 5 UK-Overall | 2 | 3 | #####    | #####    |
| 2 UK | 2020-14 | 5 UK-Overall | 2 | 4 | #####    | #####    |
| 2 UK | 2020-14 | 5 UK-Overall | 2 | 5 | #####    | #####    |
| 2 UK | 2020-14 | 5 UK-Overall | 3 | 1 | #####    | #####    |
| 2 UK | 2020-14 | 5 UK-Overall | 3 | 2 | #####    | #####    |
| 2 UK | 2020-14 | 5 UK-Overall | 3 | 3 | #####    | #####    |
| 2 UK | 2020-14 | 5 UK-Overall | 3 | 4 | #####    | #####    |
| 2 UK | 2020-14 | 5 UK-Overall | 3 | 5 | #####    | #####    |
| 2 UK | 2020-14 | 5 UK-Scotlan | 1 | 1 | #####    | #####    |
| 2 UK | 2020-14 | 5 UK-Scotlan | 1 | 2 | #####    | #####    |
| 2 UK | 2020-14 | 5 UK-Scotlan | 1 | 3 | #####    | #####    |
| 2 UK | 2020-14 | 5 UK-Scotlan | 1 | 4 | #####    | #####    |
| 2 UK | 2020-14 | 5 UK-Scotlan | 1 | 5 | #####    | #####    |
| 2 UK | 2020-14 | 5 UK-Scotlan | 2 | 1 | #####    | #####    |
| 2 UK | 2020-14 | 5 UK-Scotlan | 2 | 2 | #####    | #####    |
| 2 UK | 2020-14 | 5 UK-Scotlan | 2 | 3 | #####    | #####    |
| 2 UK | 2020-14 | 5 UK-Scotlan | 2 | 4 | #####    | #####    |
| 2 UK | 2020-14 | 5 UK-Scotlan | 2 | 5 | #####    | #####    |
| 2 UK | 2020-14 | 5 UK-Scotlan | 3 | 1 | #####    | #####    |
| 2 UK | 2020-14 | 5 UK-Scotlan | 3 | 2 | 0        | 0        |
| 2 UK | 2020-14 | 5 UK-Scotlan | 3 | 3 | #####    | #####    |
| 2 UK | 2020-14 | 5 UK-Scotlan | 3 | 4 | #####    | #####    |
| 2 UK | 2020-14 | 5 UK-Scotlan | 3 | 5 | 1.166667 | #####    |
| 2 UK | 2020-14 | 5 UK-Wales   | 1 | 1 | #####    | #####    |
| 2 UK | 2020-14 | 5 UK-Wales   | 1 | 2 | 0.3      | #####    |
| 2 UK | 2020-14 | 5 UK-Wales   | 1 | 3 | #####    | #####    |
| 2 UK | 2020-14 | 5 UK-Wales   | 1 | 4 | #####    | #####    |
| 2 UK | 2020-14 | 5 UK-Wales   | 1 | 5 | #####    | #####    |
| 2 UK | 2020-14 | 5 UK-Wales   | 2 | 1 | #####    | #####    |
| 2 UK | 2020-14 | 5 UK-Wales   | 2 | 2 | 0.3      | #####    |
| 2 UK | 2020-14 | 5 UK-Wales   | 2 | 3 | #####    | #####    |
| 2 UK | 2020-14 | 5 UK-Wales   | 2 | 4 | #####    | #####    |
| 2 UK | 2020-14 | 5 UK-Wales   | 2 | 5 | #####    | #####    |
| 2 UK | 2020-14 | 5 UK-Wales   | 3 | 1 | #####    | #####    |
| 2 UK | 2020-14 | 5 UK-Wales   | 3 | 2 | 0        | 0        |
| 2 UK | 2020-14 | 5 UK-Wales   | 3 | 3 | #####    | #####    |
| 2 UK | 2020-14 | 5 UK-Wales   | 3 | 4 | 0.625    | #####    |
| 2 UK | 2020-14 | 5 UK-Wales   | 3 | 5 | #####    | #####    |
| 2 UK | 2020-15 | 1 UK-Englan  | 1 | 1 | 3.072947 | #####    |
| 2 UK | 2020-15 | 1 UK-Englan  | 1 | 2 | 3.983192 | #####    |
| 2 UK | 2020-15 | 1 UK-Englan  | 1 | 3 | 3.484963 | #####    |
| 2 UK | 2020-15 | 1 UK-Englan  | 1 | 4 | 3.385898 | #####    |
| 2 UK | 2020-15 | 1 UK-Englan  | 1 | 5 | 1.724271 | #####    |
| 2 UK | 2020-15 | 1 UK-Englan  | 2 | 1 | 3.171234 | #####    |
| 2 UK | 2020-15 | 1 UK-Englan  | 2 | 2 | 4.153846 | 1.132822 |
| 2 UK | 2020-15 | 1 UK-Englan  | 2 | 3 | 3.474359 | #####    |
| 2 UK | 2020-15 | 1 UK-Englan  | 2 | 4 | 3.390909 | #####    |
| 2 UK | 2020-15 | 1 UK-Englan  | 2 | 5 | 1.611111 | #####    |
| 2 UK | 2020-15 | 1 UK-Englan  | 3 | 1 | 2.937581 | #####    |
| 2 UK | 2020-15 | 1 UK-Englan  | 3 | 2 | 3        | 0        |
| 2 UK | 2020-15 | 1 UK-Englan  | 3 | 3 | 3.5      | #####    |
| 2 UK | 2020-15 | 1 UK-Englan  | 3 | 4 | 3.38     | #####    |
| 2 UK | 2020-15 | 1 UK-Englan  | 3 | 5 | 1.833333 | #####    |
| 2 UK | 2020-15 | 1 UK-London  | 1 | 1 | 1.802655 | #####    |

|    |      |         |              |   |   |          |          |  |
|----|------|---------|--------------|---|---|----------|----------|--|
| 1  |      |         |              |   |   |          |          |  |
| 2  |      |         |              |   |   |          |          |  |
| 3  | 2 UK | 2020-15 | 1 UK-London  | 1 | 2 | 1.75     | #####    |  |
| 4  | 2 UK | 2020-15 | 1 UK-London  | 1 | 3 | 2.005951 | #####    |  |
| 5  | 2 UK | 2020-15 | 1 UK-London  | 1 | 4 | 1.917414 | #####    |  |
| 6  | 2 UK | 2020-15 | 1 UK-London  | 1 | 5 | 1.261488 | #####    |  |
| 7  | 2 UK | 2020-15 | 1 UK-London  | 2 | 1 | 1.825165 | #####    |  |
| 8  | 2 UK | 2020-15 | 1 UK-London  | 2 | 2 | 1.75     | #####    |  |
| 9  | 2 UK | 2020-15 | 1 UK-London  | 2 | 3 | 1.866667 | #####    |  |
| 10 | 2 UK | 2020-15 | 1 UK-London  | 2 | 4 | 2.5625   | #####    |  |
| 11 | 2 UK | 2020-15 | 1 UK-London  | 2 | 5 | #####    | #####    |  |
| 12 | 2 UK | 2020-15 | 1 UK-London  | 3 | 1 | 1.766617 | #####    |  |
| 13 | 2 UK | 2020-15 | 1 UK-London  | 3 | 3 | 2.25     | #####    |  |
| 14 | 2 UK | 2020-15 | 1 UK-London  | 3 | 4 | 1.230769 | #####    |  |
| 15 | 2 UK | 2020-15 | 1 UK-London  | 3 | 5 | 1.875    | #####    |  |
| 16 | 2 UK | 2020-15 | 1 UK-Norther | 1 | 1 | 2.9274   | #####    |  |
| 17 | 2 UK | 2020-15 | 1 UK-Norther | 1 | 3 | 5        | 1.767886 |  |
| 18 | 2 UK | 2020-15 | 1 UK-Norther | 1 | 4 | 2.966781 | #####    |  |
| 19 | 2 UK | 2020-15 | 1 UK-Norther | 1 | 5 | 1.610782 | #####    |  |
| 20 | 2 UK | 2020-15 | 1 UK-Norther | 2 | 1 | 3.620296 | #####    |  |
| 21 | 2 UK | 2020-15 | 1 UK-Norther | 2 | 3 | 5        | 1.767886 |  |
| 22 | 2 UK | 2020-15 | 1 UK-Norther | 2 | 4 | 3.894737 | #####    |  |
| 23 | 2 UK | 2020-15 | 1 UK-Norther | 2 | 5 | 1.555556 | #####    |  |
| 24 | 2 UK | 2020-15 | 1 UK-Norther | 3 | 1 | 1.932384 | #####    |  |
| 25 | 2 UK | 2020-15 | 1 UK-Norther | 3 | 4 | 2.1      | #####    |  |
| 26 | 2 UK | 2020-15 | 1 UK-Norther | 3 | 5 | 1.666667 | #####    |  |
| 27 | 2 UK | 2020-15 | 1 UK-Overall | 1 | 1 | 2.929581 | #####    |  |
| 28 | 2 UK | 2020-15 | 1 UK-Overall | 1 | 2 | 3.967557 | #####    |  |
| 29 | 2 UK | 2020-15 | 1 UK-Overall | 1 | 3 | 3.27296  | #####    |  |
| 30 | 2 UK | 2020-15 | 1 UK-Overall | 1 | 4 | 3.16872  | #####    |  |
| 31 | 2 UK | 2020-15 | 1 UK-Overall | 1 | 5 | 1.713915 | #####    |  |
| 32 | 2 UK | 2020-15 | 1 UK-Overall | 2 | 1 | 3.053607 | #####    |  |
| 33 | 2 UK | 2020-15 | 1 UK-Overall | 2 | 2 | 4.081976 | #####    |  |
| 34 | 2 UK | 2020-15 | 1 UK-Overall | 2 | 3 | 3.32672  | #####    |  |
| 35 | 2 UK | 2020-15 | 1 UK-Overall | 2 | 4 | 3.313439 | #####    |  |
| 36 | 2 UK | 2020-15 | 1 UK-Overall | 2 | 5 | 1.541458 | #####    |  |
| 37 | 2 UK | 2020-15 | 1 UK-Overall | 3 | 1 | 2.756623 | #####    |  |
| 38 | 2 UK | 2020-15 | 1 UK-Overall | 3 | 2 | 3.317607 | #####    |  |
| 39 | 2 UK | 2020-15 | 1 UK-Overall | 3 | 3 | 3.193491 | #####    |  |
| 40 | 2 UK | 2020-15 | 1 UK-Overall | 3 | 4 | 3.003871 | #####    |  |
| 41 | 2 UK | 2020-15 | 1 UK-Overall | 3 | 5 | 1.893574 | #####    |  |
| 42 | 2 UK | 2020-15 | 1 UK-Scotlan | 1 | 1 | 3.009696 | #####    |  |
| 43 | 2 UK | 2020-15 | 1 UK-Scotlan | 1 | 2 | 5.003125 | 1.358196 |  |
| 44 | 2 UK | 2020-15 | 1 UK-Scotlan | 1 | 3 | 3.112948 | #####    |  |
| 45 | 2 UK | 2020-15 | 1 UK-Scotlan | 1 | 4 | 2.882357 | #####    |  |
| 46 | 2 UK | 2020-15 | 1 UK-Scotlan | 1 | 5 | 1.944145 | #####    |  |
| 47 | 2 UK | 2020-15 | 1 UK-Scotlan | 2 | 1 | 3.422185 | #####    |  |
| 48 | 2 UK | 2020-15 | 1 UK-Scotlan | 2 | 2 | 5.222222 | 1.936002 |  |
| 49 | 2 UK | 2020-15 | 1 UK-Scotlan | 2 | 3 | 3.741935 | #####    |  |
| 50 | 2 UK | 2020-15 | 1 UK-Scotlan | 2 | 4 | 3.368421 | #####    |  |
| 51 | 2 UK | 2020-15 | 1 UK-Scotlan | 2 | 5 | 1.703704 | #####    |  |
| 52 | 2 UK | 2020-15 | 1 UK-Scotlan | 3 | 1 | 2.494304 | #####    |  |
| 53 | 2 UK | 2020-15 | 1 UK-Scotlan | 3 | 2 | 4.5      | #####    |  |
| 54 | 2 UK | 2020-15 | 1 UK-Scotlan | 3 | 3 | 2.3      | #####    |  |
| 55 | 2 UK | 2020-15 | 1 UK-Scotlan | 3 | 4 | 2.375    | #####    |  |
| 56 | 2 UK | 2020-15 | 1 UK-Scotlan | 3 | 5 | 2.210526 | #####    |  |
| 57 | 2 UK | 2020-15 | 1 UK-Wales   | 1 | 1 | 3.213511 | 0.411277 |  |
| 58 | 2 UK | 2020-15 | 1 UK-Wales   | 1 | 2 | 4.75     | 2.161598 |  |

|    |      |         |              |   |   |          |          |
|----|------|---------|--------------|---|---|----------|----------|
| 1  |      |         |              |   |   |          |          |
| 2  |      |         |              |   |   |          |          |
| 3  | 2 UK | 2020-15 | 1 UK-Wales   | 1 | 3 | 3.515477 | 1.039563 |
| 4  | 2 UK | 2020-15 | 1 UK-Wales   | 1 | 4 | 3.473726 | #####    |
| 5  | 2 UK | 2020-15 | 1 UK-Wales   | 1 | 5 | 2.127965 | #####    |
| 6  | 2 UK | 2020-15 | 1 UK-Wales   | 2 | 1 | 3.41502  | #####    |
| 7  | 2 UK | 2020-15 | 1 UK-Wales   | 2 | 2 | 4.75     | 2.161598 |
| 8  | 2 UK | 2020-15 | 1 UK-Wales   | 2 | 3 | 4.692308 | 1.485272 |
| 9  | 2 UK | 2020-15 | 1 UK-Wales   | 2 | 4 | 3.404762 | #####    |
| 10 | 2 UK | 2020-15 | 1 UK-Wales   | 2 | 5 | 1.782609 | #####    |
| 11 | 2 UK | 2020-15 | 1 UK-Wales   | 3 | 1 | 2.910383 | #####    |
| 12 | 2 UK | 2020-15 | 1 UK-Wales   | 3 | 3 | 1.666667 | #####    |
| 13 | 2 UK | 2020-15 | 1 UK-Wales   | 3 | 4 | 3.55     | 1.165143 |
| 14 | 2 UK | 2020-15 | 1 UK-Wales   | 3 | 5 | 2.636364 | #####    |
| 15 | 2 UK | 2020-15 | 2 UK-England | 1 | 1 | 1.578526 | #####    |
| 16 | 2 UK | 2020-15 | 2 UK-England | 1 | 2 | 1.984035 | #####    |
| 17 | 2 UK | 2020-15 | 2 UK-England | 1 | 3 | 1.813372 | #####    |
| 18 | 2 UK | 2020-15 | 2 UK-England | 1 | 4 | 1.541401 | #####    |
| 19 | 2 UK | 2020-15 | 2 UK-England | 1 | 5 | 1.113408 | #####    |
| 20 | 2 UK | 2020-15 | 2 UK-England | 2 | 1 | 1.509933 | #####    |
| 21 | 2 UK | 2020-15 | 2 UK-England | 2 | 2 | 1.807692 | #####    |
| 22 | 2 UK | 2020-15 | 2 UK-England | 2 | 3 | 1.95122  | #####    |
| 23 | 2 UK | 2020-15 | 2 UK-England | 2 | 4 | 1.270492 | #####    |
| 24 | 2 UK | 2020-15 | 2 UK-England | 2 | 5 | #####    | #####    |
| 25 | 2 UK | 2020-15 | 2 UK-England | 3 | 1 | 1.670752 | #####    |
| 26 | 2 UK | 2020-15 | 2 UK-England | 3 | 2 | 3        | 0        |
| 27 | 2 UK | 2020-15 | 2 UK-England | 3 | 3 | 1.625    | #####    |
| 28 | 2 UK | 2020-15 | 2 UK-England | 3 | 4 | 1.857143 | #####    |
| 29 | 2 UK | 2020-15 | 2 UK-England | 3 | 5 | 1.33871  | #####    |
| 30 | 2 UK | 2020-15 | 2 UK-London  | 1 | 1 | 1.199563 | #####    |
| 31 | 2 UK | 2020-15 | 2 UK-London  | 1 | 2 | 1.25     | #####    |
| 32 | 2 UK | 2020-15 | 2 UK-London  | 1 | 3 | 1.61091  | #####    |
| 33 | 2 UK | 2020-15 | 2 UK-London  | 1 | 4 | 1.006618 | #####    |
| 34 | 2 UK | 2020-15 | 2 UK-London  | 1 | 5 | #####    | #####    |
| 35 | 2 UK | 2020-15 | 2 UK-London  | 2 | 1 | 1.212787 | #####    |
| 36 | 2 UK | 2020-15 | 2 UK-London  | 2 | 2 | 1.25     | #####    |
| 37 | 2 UK | 2020-15 | 2 UK-London  | 2 | 3 | 1.333333 | #####    |
| 38 | 2 UK | 2020-15 | 2 UK-London  | 2 | 4 | 1.333333 | #####    |
| 39 | 2 UK | 2020-15 | 2 UK-London  | 2 | 5 | 0.8125   | #####    |
| 40 | 2 UK | 2020-15 | 2 UK-London  | 3 | 1 | 1.179358 | #####    |
| 41 | 2 UK | 2020-15 | 2 UK-London  | 3 | 3 | 2        | #####    |
| 42 | 2 UK | 2020-15 | 2 UK-London  | 3 | 4 | #####    | #####    |
| 43 | 2 UK | 2020-15 | 2 UK-London  | 3 | 5 | 0.375    | #####    |
| 44 | 2 UK | 2020-15 | 2 UK-Norther | 1 | 1 | 1.366463 | #####    |
| 45 | 2 UK | 2020-15 | 2 UK-Norther | 1 | 3 | 1.75     | #####    |
| 46 | 2 UK | 2020-15 | 2 UK-Norther | 1 | 4 | 1.399155 | #####    |
| 47 | 2 UK | 2020-15 | 2 UK-Norther | 1 | 5 | 1.082839 | #####    |
| 48 | 2 UK | 2020-15 | 2 UK-Norther | 2 | 1 | 1.446969 | #####    |
| 49 | 2 UK | 2020-15 | 2 UK-Norther | 2 | 3 | 1.75     | #####    |
| 50 | 2 UK | 2020-15 | 2 UK-Norther | 2 | 4 | 1.5      | #####    |
| 51 | 2 UK | 2020-15 | 2 UK-Norther | 2 | 5 | 1        | #####    |
| 52 | 2 UK | 2020-15 | 2 UK-Norther | 3 | 1 | 1.248426 | #####    |
| 53 | 2 UK | 2020-15 | 2 UK-Norther | 3 | 4 | 1.3      | #####    |
| 54 | 2 UK | 2020-15 | 2 UK-Norther | 3 | 5 | 1.166667 | #####    |
| 55 | 2 UK | 2020-15 | 2 UK-Overall | 1 | 1 | 1.515528 | #####    |
| 56 | 2 UK | 2020-15 | 2 UK-Overall | 1 | 2 | 2.001542 | #####    |
| 57 | 2 UK | 2020-15 | 2 UK-Overall | 1 | 3 | 1.75515  | #####    |
| 58 | 2 UK | 2020-15 | 2 UK-Overall | 1 | 4 | 1.427482 | #####    |
| 59 | 2 UK | 2020-15 | 2 UK-Overall | 1 |   |          |          |
| 60 | 2 UK | 2020-15 | 2 UK-Overall | 1 |   |          |          |

|    |      |         |              |   |   |          |       |  |  |
|----|------|---------|--------------|---|---|----------|-------|--|--|
| 1  |      |         |              |   |   |          |       |  |  |
| 2  |      |         |              |   |   |          |       |  |  |
| 3  | 2 UK | 2020-15 | 2 UK-Overall | 1 | 5 | 1.086979 | ##### |  |  |
| 4  | 2 UK | 2020-15 | 2 UK-Overall | 2 | 1 | 1.481616 | ##### |  |  |
| 5  | 2 UK | 2020-15 | 2 UK-Overall | 2 | 2 | 1.788495 | ##### |  |  |
| 6  | 2 UK | 2020-15 | 2 UK-Overall | 2 | 3 | 1.869325 | ##### |  |  |
| 7  | 2 UK | 2020-15 | 2 UK-Overall | 2 | 4 | 1.284325 | ##### |  |  |
| 8  | 2 UK | 2020-15 | 2 UK-Overall | 2 | 5 | #####    | ##### |  |  |
| 9  | 2 UK | 2020-15 | 2 UK-Overall | 3 | 1 | 1.561836 | ##### |  |  |
| 10 | 2 UK | 2020-15 | 2 UK-Overall | 3 | 2 | 3.211738 | ##### |  |  |
| 11 | 2 UK | 2020-15 | 2 UK-Overall | 3 | 3 | 1.596185 | ##### |  |  |
| 12 | 2 UK | 2020-15 | 2 UK-Overall | 3 | 4 | 1.593475 | ##### |  |  |
| 13 | 2 UK | 2020-15 | 2 UK-Overall | 3 | 5 | 1.27047  | ##### |  |  |
| 14 | 2 UK | 2020-15 | 2 UK-Scotlan | 1 | 1 | 1.459193 | ##### |  |  |
| 15 | 2 UK | 2020-15 | 2 UK-Scotlan | 1 | 2 | 2.761539 | ##### |  |  |
| 16 | 2 UK | 2020-15 | 2 UK-Scotlan | 1 | 3 | 1.500192 | ##### |  |  |
| 17 | 2 UK | 2020-15 | 2 UK-Scotlan | 1 | 4 | 1.044998 | ##### |  |  |
| 18 | 2 UK | 2020-15 | 2 UK-Scotlan | 1 | 5 | 1.260117 | ##### |  |  |
| 19 | 2 UK | 2020-15 | 2 UK-Scotlan | 2 | 1 | 1.629481 | ##### |  |  |
| 20 | 2 UK | 2020-15 | 2 UK-Scotlan | 2 | 2 | 2.222222 | ##### |  |  |
| 21 | 2 UK | 2020-15 | 2 UK-Scotlan | 2 | 3 | 2.0625   | ##### |  |  |
| 22 | 2 UK | 2020-15 | 2 UK-Scotlan | 2 | 4 | 1.121951 | ##### |  |  |
| 23 | 2 UK | 2020-15 | 2 UK-Scotlan | 2 | 5 | 1.222222 | ##### |  |  |
| 24 | 2 UK | 2020-15 | 2 UK-Scotlan | 3 | 1 | 1.248956 | ##### |  |  |
| 25 | 2 UK | 2020-15 | 2 UK-Scotlan | 3 | 2 | 4        | 0     |  |  |
| 26 | 2 UK | 2020-15 | 2 UK-Scotlan | 3 | 3 | #####    | ##### |  |  |
| 27 | 2 UK | 2020-15 | 2 UK-Scotlan | 3 | 4 | #####    | ##### |  |  |
| 28 | 2 UK | 2020-15 | 2 UK-Scotlan | 3 | 5 | 1.3      | ##### |  |  |
| 29 | 2 UK | 2020-15 | 2 UK-Wales   | 1 | 1 | 1.418394 | ##### |  |  |
| 30 | 2 UK | 2020-15 | 2 UK-Wales   | 1 | 2 | 1.5      | ##### |  |  |
| 31 | 2 UK | 2020-15 | 2 UK-Wales   | 1 | 3 | 1.677051 | ##### |  |  |
| 32 | 2 UK | 2020-15 | 2 UK-Wales   | 1 | 4 | 1.361024 | ##### |  |  |
| 33 | 2 UK | 2020-15 | 2 UK-Wales   | 1 | 5 | 1.276159 | ##### |  |  |
| 34 | 2 UK | 2020-15 | 2 UK-Wales   | 2 | 1 | 1.461672 | ##### |  |  |
| 35 | 2 UK | 2020-15 | 2 UK-Wales   | 2 | 2 | 1.5      | ##### |  |  |
| 36 | 2 UK | 2020-15 | 2 UK-Wales   | 2 | 3 | 1.866667 | ##### |  |  |
| 37 | 2 UK | 2020-15 | 2 UK-Wales   | 2 | 4 | 1.5      | ##### |  |  |
| 38 | 2 UK | 2020-15 | 2 UK-Wales   | 2 | 5 | 1.041667 | ##### |  |  |
| 39 | 2 UK | 2020-15 | 2 UK-Wales   | 3 | 1 | 1.349205 | ##### |  |  |
| 40 | 2 UK | 2020-15 | 2 UK-Wales   | 3 | 3 | 1.333333 | ##### |  |  |
| 41 | 2 UK | 2020-15 | 2 UK-Wales   | 3 | 4 | 1.2      | ##### |  |  |
| 42 | 2 UK | 2020-15 | 2 UK-Wales   | 3 | 5 | 1.636364 | ##### |  |  |
| 43 | 2 UK | 2020-15 | 3 UK-Englan  | 1 | 1 | 0        | 0     |  |  |
| 44 | 2 UK | 2020-15 | 3 UK-Englan  | 1 | 2 | 0        | 0     |  |  |
| 45 | 2 UK | 2020-15 | 3 UK-Englan  | 1 | 3 | 0        | 0     |  |  |
| 46 | 2 UK | 2020-15 | 3 UK-Englan  | 1 | 4 | 0        | 0     |  |  |
| 47 | 2 UK | 2020-15 | 3 UK-Englan  | 1 | 5 | 0        | 0     |  |  |
| 48 | 2 UK | 2020-15 | 3 UK-Englan  | 2 | 1 | 0        | 0     |  |  |
| 49 | 2 UK | 2020-15 | 3 UK-Englan  | 2 | 2 | 0        | 0     |  |  |
| 50 | 2 UK | 2020-15 | 3 UK-Englan  | 2 | 3 | 0        | 0     |  |  |
| 51 | 2 UK | 2020-15 | 3 UK-Englan  | 2 | 4 | 0        | 0     |  |  |
| 52 | 2 UK | 2020-15 | 3 UK-Englan  | 2 | 5 | 0        | 0     |  |  |
| 53 | 2 UK | 2020-15 | 3 UK-Englan  | 3 | 1 | 0        | 0     |  |  |
| 54 | 2 UK | 2020-15 | 3 UK-Englan  | 3 | 2 | 0        | 0     |  |  |
| 55 | 2 UK | 2020-15 | 3 UK-Englan  | 3 | 3 | 0        | 0     |  |  |
| 56 | 2 UK | 2020-15 | 3 UK-Englan  | 3 | 4 | 0        | 0     |  |  |
| 57 | 2 UK | 2020-15 | 3 UK-Englan  | 3 | 5 | 0        | 0     |  |  |
| 58 | 2 UK | 2020-15 | 3 UK-London  | 1 | 1 | 0        | 0     |  |  |

|    |      |         |              |   |   |   |   |
|----|------|---------|--------------|---|---|---|---|
| 1  |      |         |              |   |   |   |   |
| 2  |      |         |              |   |   |   |   |
| 3  | 2 UK | 2020-15 | 3 UK-London  | 1 | 2 | 0 | 0 |
| 4  | 2 UK | 2020-15 | 3 UK-London  | 1 | 3 | 0 | 0 |
| 5  | 2 UK | 2020-15 | 3 UK-London  | 1 | 4 | 0 | 0 |
| 6  | 2 UK | 2020-15 | 3 UK-London  | 1 | 5 | 0 | 0 |
| 7  | 2 UK | 2020-15 | 3 UK-London  | 2 | 1 | 0 | 0 |
| 8  | 2 UK | 2020-15 | 3 UK-London  | 2 | 2 | 0 | 0 |
| 9  | 2 UK | 2020-15 | 3 UK-London  | 2 | 3 | 0 | 0 |
| 10 | 2 UK | 2020-15 | 3 UK-London  | 2 | 4 | 0 | 0 |
| 11 | 2 UK | 2020-15 | 3 UK-London  | 2 | 5 | 0 | 0 |
| 12 | 2 UK | 2020-15 | 3 UK-London  | 3 | 1 | 0 | 0 |
| 13 | 2 UK | 2020-15 | 3 UK-London  | 3 | 3 | 0 | 0 |
| 14 | 2 UK | 2020-15 | 3 UK-London  | 3 | 4 | 0 | 0 |
| 15 | 2 UK | 2020-15 | 3 UK-London  | 3 | 5 | 0 | 0 |
| 16 | 2 UK | 2020-15 | 3 UK-Norther | 1 | 1 | 0 | 0 |
| 17 | 2 UK | 2020-15 | 3 UK-Norther | 1 | 3 | 0 | 0 |
| 18 | 2 UK | 2020-15 | 3 UK-Norther | 1 | 4 | 0 | 0 |
| 19 | 2 UK | 2020-15 | 3 UK-Norther | 1 | 5 | 0 | 0 |
| 20 | 2 UK | 2020-15 | 3 UK-Norther | 2 | 1 | 0 | 0 |
| 21 | 2 UK | 2020-15 | 3 UK-Norther | 2 | 3 | 0 | 0 |
| 22 | 2 UK | 2020-15 | 3 UK-Norther | 2 | 4 | 0 | 0 |
| 23 | 2 UK | 2020-15 | 3 UK-Norther | 2 | 5 | 0 | 0 |
| 24 | 2 UK | 2020-15 | 3 UK-Norther | 3 | 1 | 0 | 0 |
| 25 | 2 UK | 2020-15 | 3 UK-Norther | 3 | 4 | 0 | 0 |
| 26 | 2 UK | 2020-15 | 3 UK-Norther | 3 | 5 | 0 | 0 |
| 27 | 2 UK | 2020-15 | 3 UK-Overall | 1 | 1 | 0 | 0 |
| 28 | 2 UK | 2020-15 | 3 UK-Overall | 1 | 2 | 0 | 0 |
| 29 | 2 UK | 2020-15 | 3 UK-Overall | 1 | 3 | 0 | 0 |
| 30 | 2 UK | 2020-15 | 3 UK-Overall | 1 | 4 | 0 | 0 |
| 31 | 2 UK | 2020-15 | 3 UK-Overall | 1 | 5 | 0 | 0 |
| 32 | 2 UK | 2020-15 | 3 UK-Overall | 2 | 1 | 0 | 0 |
| 33 | 2 UK | 2020-15 | 3 UK-Overall | 2 | 2 | 0 | 0 |
| 34 | 2 UK | 2020-15 | 3 UK-Overall | 2 | 3 | 0 | 0 |
| 35 | 2 UK | 2020-15 | 3 UK-Overall | 2 | 4 | 0 | 0 |
| 36 | 2 UK | 2020-15 | 3 UK-Overall | 2 | 5 | 0 | 0 |
| 37 | 2 UK | 2020-15 | 3 UK-Overall | 3 | 1 | 0 | 0 |
| 38 | 2 UK | 2020-15 | 3 UK-Overall | 3 | 2 | 0 | 0 |
| 39 | 2 UK | 2020-15 | 3 UK-Overall | 3 | 3 | 0 | 0 |
| 40 | 2 UK | 2020-15 | 3 UK-Overall | 3 | 4 | 0 | 0 |
| 41 | 2 UK | 2020-15 | 3 UK-Overall | 3 | 5 | 0 | 0 |
| 42 | 2 UK | 2020-15 | 3 UK-Scotlan | 1 | 1 | 0 | 0 |
| 43 | 2 UK | 2020-15 | 3 UK-Scotlan | 1 | 2 | 0 | 0 |
| 44 | 2 UK | 2020-15 | 3 UK-Scotlan | 1 | 3 | 0 | 0 |
| 45 | 2 UK | 2020-15 | 3 UK-Scotlan | 1 | 4 | 0 | 0 |
| 46 | 2 UK | 2020-15 | 3 UK-Scotlan | 1 | 5 | 0 | 0 |
| 47 | 2 UK | 2020-15 | 3 UK-Scotlan | 2 | 1 | 0 | 0 |
| 48 | 2 UK | 2020-15 | 3 UK-Scotlan | 2 | 2 | 0 | 0 |
| 49 | 2 UK | 2020-15 | 3 UK-Scotlan | 2 | 3 | 0 | 0 |
| 50 | 2 UK | 2020-15 | 3 UK-Scotlan | 2 | 4 | 0 | 0 |
| 51 | 2 UK | 2020-15 | 3 UK-Scotlan | 2 | 5 | 0 | 0 |
| 52 | 2 UK | 2020-15 | 3 UK-Scotlan | 3 | 1 | 0 | 0 |
| 53 | 2 UK | 2020-15 | 3 UK-Scotlan | 3 | 2 | 0 | 0 |
| 54 | 2 UK | 2020-15 | 3 UK-Scotlan | 3 | 3 | 0 | 0 |
| 55 | 2 UK | 2020-15 | 3 UK-Scotlan | 3 | 4 | 0 | 0 |
| 56 | 2 UK | 2020-15 | 3 UK-Scotlan | 3 | 5 | 0 | 0 |
| 57 | 2 UK | 2020-15 | 3 UK-Wales   | 1 | 1 | 0 | 0 |
| 58 | 2 UK | 2020-15 | 3 UK-Wales   | 1 | 2 | 0 | 0 |
| 59 | 2 UK | 2020-15 | 3 UK-Wales   | 1 | 2 | 0 | 0 |
| 60 | 2 UK | 2020-15 | 3 UK-Wales   | 1 | 2 | 0 | 0 |



|    |      |         |              |   |   |          |          |  |
|----|------|---------|--------------|---|---|----------|----------|--|
| 1  |      |         |              |   |   |          |          |  |
| 2  |      |         |              |   |   |          |          |  |
| 3  | 2 UK | 2020-15 | 3 UK-Wales   | 1 | 3 | 0        | 0        |  |
| 4  | 2 UK | 2020-15 | 3 UK-Wales   | 1 | 4 | 0        | 0        |  |
| 5  | 2 UK | 2020-15 | 3 UK-Wales   | 1 | 5 | 0        | 0        |  |
| 6  | 2 UK | 2020-15 | 3 UK-Wales   | 2 | 1 | 0        | 0        |  |
| 7  | 2 UK | 2020-15 | 3 UK-Wales   | 2 | 2 | 0        | 0        |  |
| 8  | 2 UK | 2020-15 | 3 UK-Wales   | 2 | 3 | 0        | 0        |  |
| 9  | 2 UK | 2020-15 | 3 UK-Wales   | 2 | 4 | 0        | 0        |  |
| 10 | 2 UK | 2020-15 | 3 UK-Wales   | 2 | 5 | 0        | 0        |  |
| 11 | 2 UK | 2020-15 | 3 UK-Wales   | 3 | 1 | 0        | 0        |  |
| 12 | 2 UK | 2020-15 | 3 UK-Wales   | 3 | 3 | 0        | 0        |  |
| 13 | 2 UK | 2020-15 | 3 UK-Wales   | 3 | 4 | 0        | 0        |  |
| 14 | 2 UK | 2020-15 | 3 UK-Wales   | 3 | 5 | 0        | 0        |  |
| 15 | 2 UK | 2020-15 | 4 UK-England | 1 | 1 | #####    | #####    |  |
| 16 | 2 UK | 2020-15 | 4 UK-England | 1 | 2 | 1.84881  | #####    |  |
| 17 | 2 UK | 2020-15 | 4 UK-England | 1 | 3 | #####    | #####    |  |
| 18 | 2 UK | 2020-15 | 4 UK-England | 1 | 4 | 1.361443 | #####    |  |
| 19 | 2 UK | 2020-15 | 4 UK-England | 1 | 5 | #####    | #####    |  |
| 20 | 2 UK | 2020-15 | 4 UK-England | 2 | 1 | 1.261871 | #####    |  |
| 21 | 2 UK | 2020-15 | 4 UK-England | 2 | 2 | 2.387097 | 1.147556 |  |
| 22 | 2 UK | 2020-15 | 4 UK-England | 2 | 3 | #####    | #####    |  |
| 23 | 2 UK | 2020-15 | 4 UK-England | 2 | 4 | 1.859504 | #####    |  |
| 24 | 2 UK | 2020-15 | 4 UK-England | 2 | 5 | #####    | #####    |  |
| 25 | 2 UK | 2020-15 | 4 UK-England | 3 | 1 | #####    | #####    |  |
| 26 | 2 UK | 2020-15 | 4 UK-England | 3 | 2 | 0        | 0        |  |
| 27 | 2 UK | 2020-15 | 4 UK-England | 3 | 3 | 1.12     | #####    |  |
| 28 | 2 UK | 2020-15 | 4 UK-England | 3 | 4 | #####    | #####    |  |
| 29 | 2 UK | 2020-15 | 4 UK-England | 3 | 5 | #####    | #####    |  |
| 30 | 2 UK | 2020-15 | 4 UK-England | 3 | 5 | #####    | #####    |  |
| 31 | 2 UK | 2020-15 | 4 UK-London  | 1 | 1 | #####    | #####    |  |
| 32 | 2 UK | 2020-15 | 4 UK-London  | 1 | 2 | 0        | 0        |  |
| 33 | 2 UK | 2020-15 | 4 UK-London  | 1 | 3 | #####    | #####    |  |
| 34 | 2 UK | 2020-15 | 4 UK-London  | 1 | 4 | #####    | #####    |  |
| 35 | 2 UK | 2020-15 | 4 UK-London  | 1 | 5 | 0        | 0        |  |
| 36 | 2 UK | 2020-15 | 4 UK-London  | 2 | 1 | #####    | #####    |  |
| 37 | 2 UK | 2020-15 | 4 UK-London  | 2 | 2 | 0        | 0        |  |
| 38 | 2 UK | 2020-15 | 4 UK-London  | 2 | 3 | 0.1875   | #####    |  |
| 39 | 2 UK | 2020-15 | 4 UK-London  | 2 | 4 | 0.625    | #####    |  |
| 40 | 2 UK | 2020-15 | 4 UK-London  | 2 | 5 | 0        | 0        |  |
| 41 | 2 UK | 2020-15 | 4 UK-London  | 3 | 1 | 0        | 0        |  |
| 42 | 2 UK | 2020-15 | 4 UK-London  | 3 | 3 | 0        | 0        |  |
| 43 | 2 UK | 2020-15 | 4 UK-London  | 3 | 4 | 0        | 0        |  |
| 44 | 2 UK | 2020-15 | 4 UK-London  | 3 | 5 | 0        | 0        |  |
| 45 | 2 UK | 2020-15 | 4 UK-Norther | 1 | 1 | #####    | #####    |  |
| 46 | 2 UK | 2020-15 | 4 UK-Norther | 1 | 3 | 2.222222 | 1.593131 |  |
| 47 | 2 UK | 2020-15 | 4 UK-Norther | 1 | 4 | #####    | #####    |  |
| 48 | 2 UK | 2020-15 | 4 UK-Norther | 1 | 5 | #####    | #####    |  |
| 49 | 2 UK | 2020-15 | 4 UK-Norther | 2 | 1 | 1.502491 | #####    |  |
| 50 | 2 UK | 2020-15 | 4 UK-Norther | 2 | 3 | 2.222222 | 1.593131 |  |
| 51 | 2 UK | 2020-15 | 4 UK-Norther | 2 | 4 | 1.7      | #####    |  |
| 52 | 2 UK | 2020-15 | 4 UK-Norther | 2 | 5 | #####    | #####    |  |
| 53 | 2 UK | 2020-15 | 4 UK-Norther | 3 | 1 | #####    | #####    |  |
| 54 | 2 UK | 2020-15 | 4 UK-Norther | 3 | 4 | #####    | #####    |  |
| 55 | 2 UK | 2020-15 | 4 UK-Norther | 3 | 5 | 0        | 0        |  |
| 56 | 2 UK | 2020-15 | 4 UK-Overall | 1 | 1 | #####    | #####    |  |
| 57 | 2 UK | 2020-15 | 4 UK-Overall | 1 | 2 | 1.731704 | #####    |  |
| 58 | 2 UK | 2020-15 | 4 UK-Overall | 1 | 3 | #####    | #####    |  |
| 59 | 2 UK | 2020-15 | 4 UK-Overall | 1 | 4 | 1.209168 | #####    |  |
| 60 | 2 UK | 2020-15 | 4 UK-Overall | 1 | 4 | 1.209168 | #####    |  |

1  
2  
3  
4  
5  
6  
7  
8  
9  
10  
11  
12  
13  
14  
15  
16  
17  
18  
19  
20  
21  
22  
23  
24  
25  
26  
27  
28  
29  
30  
31  
32  
33  
34  
35  
36  
37  
38  
39  
40  
41  
42  
43  
44  
45  
46  
47  
48  
49  
50  
51  
52  
53  
54  
55  
56  
57  
58  
59  
60

|      |         |              |   |   |          |          |
|------|---------|--------------|---|---|----------|----------|
| 2 UK | 2020-15 | 4 UK-Overall | 1 | 5 | #####    | #####    |
| 2 UK | 2020-15 | 4 UK-Overall | 2 | 1 | 1.155431 | #####    |
| 2 UK | 2020-15 | 4 UK-Overall | 2 | 2 | 2.200353 | #####    |
| 2 UK | 2020-15 | 4 UK-Overall | 2 | 3 | #####    | #####    |
| 2 UK | 2020-15 | 4 UK-Overall | 2 | 4 | 1.669076 | #####    |
| 2 UK | 2020-15 | 4 UK-Overall | 2 | 5 | #####    | #####    |
| 2 UK | 2020-15 | 4 UK-Overall | 3 | 1 | #####    | #####    |
| 2 UK | 2020-15 | 4 UK-Overall | 3 | 2 | 0        | 0        |
| 2 UK | 2020-15 | 4 UK-Overall | 3 | 3 | #####    | #####    |
| 2 UK | 2020-15 | 4 UK-Overall | 3 | 4 | #####    | #####    |
| 2 UK | 2020-15 | 4 UK-Overall | 3 | 5 | #####    | #####    |
| 2 UK | 2020-15 | 4 UK-Scotlan | 1 | 1 | #####    | #####    |
| 2 UK | 2020-15 | 4 UK-Scotlan | 1 | 2 | 1.293172 | 1.2589   |
| 2 UK | 2020-15 | 4 UK-Scotlan | 1 | 3 | 1.33575  | #####    |
| 2 UK | 2020-15 | 4 UK-Scotlan | 1 | 4 | #####    | #####    |
| 2 UK | 2020-15 | 4 UK-Scotlan | 1 | 5 | #####    | #####    |
| 2 UK | 2020-15 | 4 UK-Scotlan | 2 | 1 | 1.233931 | #####    |
| 2 UK | 2020-15 | 4 UK-Scotlan | 2 | 2 | 1.8      | 1.707745 |
| 2 UK | 2020-15 | 4 UK-Scotlan | 2 | 3 | 1.4375   | #####    |
| 2 UK | 2020-15 | 4 UK-Scotlan | 2 | 4 | 1.575    | #####    |
| 2 UK | 2020-15 | 4 UK-Scotlan | 2 | 5 | 0        | 0        |
| 2 UK | 2020-15 | 4 UK-Scotlan | 3 | 1 | #####    | #####    |
| 2 UK | 2020-15 | 4 UK-Scotlan | 3 | 2 | 0        | 0        |
| 2 UK | 2020-15 | 4 UK-Scotlan | 3 | 3 | 1.2      | #####    |
| 2 UK | 2020-15 | 4 UK-Scotlan | 3 | 4 | #####    | #####    |
| 2 UK | 2020-15 | 4 UK-Scotlan | 3 | 5 | 0.25     | #####    |
| 2 UK | 2020-15 | 4 UK-Wales   | 1 | 1 | 1.196106 | #####    |
| 2 UK | 2020-15 | 4 UK-Wales   | 1 | 2 | 3        | 2.598251 |
| 2 UK | 2020-15 | 4 UK-Wales   | 1 | 3 | 1.153453 | #####    |
| 2 UK | 2020-15 | 4 UK-Wales   | 1 | 4 | 1.431949 | #####    |
| 2 UK | 2020-15 | 4 UK-Wales   | 1 | 5 | #####    | #####    |
| 2 UK | 2020-15 | 4 UK-Wales   | 2 | 1 | 1.380903 | #####    |
| 2 UK | 2020-15 | 4 UK-Wales   | 2 | 2 | 3        | 2.598251 |
| 2 UK | 2020-15 | 4 UK-Wales   | 2 | 3 | 1.75     | #####    |
| 2 UK | 2020-15 | 4 UK-Wales   | 2 | 4 | 1.2      | #####    |
| 2 UK | 2020-15 | 4 UK-Wales   | 2 | 5 | #####    | #####    |
| 2 UK | 2020-15 | 4 UK-Wales   | 3 | 1 | #####    | #####    |
| 2 UK | 2020-15 | 4 UK-Wales   | 3 | 3 | 0        | 0        |
| 2 UK | 2020-15 | 4 UK-Wales   | 3 | 4 | 1.681818 | #####    |
| 2 UK | 2020-15 | 4 UK-Wales   | 3 | 5 | 0        | 0        |
| 2 UK | 2020-15 | 5 UK-Englan  | 1 | 1 | #####    | #####    |
| 2 UK | 2020-15 | 5 UK-Englan  | 1 | 2 | #####    | #####    |
| 2 UK | 2020-15 | 5 UK-Englan  | 1 | 3 | #####    | #####    |
| 2 UK | 2020-15 | 5 UK-Englan  | 1 | 4 | #####    | #####    |
| 2 UK | 2020-15 | 5 UK-Englan  | 1 | 5 | #####    | #####    |
| 2 UK | 2020-15 | 5 UK-Englan  | 2 | 1 | #####    | #####    |
| 2 UK | 2020-15 | 5 UK-Englan  | 2 | 2 | #####    | #####    |
| 2 UK | 2020-15 | 5 UK-Englan  | 2 | 3 | #####    | #####    |
| 2 UK | 2020-15 | 5 UK-Englan  | 2 | 4 | #####    | #####    |
| 2 UK | 2020-15 | 5 UK-Englan  | 2 | 5 | #####    | #####    |
| 2 UK | 2020-15 | 5 UK-Englan  | 3 | 1 | #####    | #####    |
| 2 UK | 2020-15 | 5 UK-Englan  | 3 | 2 | 0        | 0        |
| 2 UK | 2020-15 | 5 UK-Englan  | 3 | 3 | #####    | #####    |
| 2 UK | 2020-15 | 5 UK-Englan  | 3 | 4 | #####    | #####    |
| 2 UK | 2020-15 | 5 UK-Englan  | 3 | 5 | #####    | #####    |
| 2 UK | 2020-15 | 5 UK-London  | 1 | 1 | #####    | #####    |

|    |      |         |              |   |   |          |       |  |
|----|------|---------|--------------|---|---|----------|-------|--|
| 1  |      |         |              |   |   |          |       |  |
| 2  |      |         |              |   |   |          |       |  |
| 3  | 2 UK | 2020-15 | 5 UK-London  | 1 | 2 | 0.5      | ##### |  |
| 4  | 2 UK | 2020-15 | 5 UK-London  | 1 | 3 | #####    | ##### |  |
| 5  | 2 UK | 2020-15 | 5 UK-London  | 1 | 4 | #####    | ##### |  |
| 6  | 2 UK | 2020-15 | 5 UK-London  | 1 | 5 | #####    | ##### |  |
| 7  | 2 UK | 2020-15 | 5 UK-London  | 2 | 1 | #####    | ##### |  |
| 8  | 2 UK | 2020-15 | 5 UK-London  | 2 | 2 | 0.5      | ##### |  |
| 9  | 2 UK | 2020-15 | 5 UK-London  | 2 | 3 | 0.75     | ##### |  |
| 10 | 2 UK | 2020-15 | 5 UK-London  | 2 | 4 | 0.5      | ##### |  |
| 11 | 2 UK | 2020-15 | 5 UK-London  | 2 | 5 | #####    | ##### |  |
| 12 | 2 UK | 2020-15 | 5 UK-London  | 3 | 1 | #####    | ##### |  |
| 13 | 2 UK | 2020-15 | 5 UK-London  | 3 | 3 | 0.2      | ##### |  |
| 14 | 2 UK | 2020-15 | 5 UK-London  | 3 | 4 | #####    | ##### |  |
| 15 | 2 UK | 2020-15 | 5 UK-London  | 3 | 5 | 1.5      | ##### |  |
| 16 | 2 UK | 2020-15 | 5 UK-Norther | 1 | 1 | #####    | ##### |  |
| 17 | 2 UK | 2020-15 | 5 UK-Norther | 1 | 3 | #####    | ##### |  |
| 18 | 2 UK | 2020-15 | 5 UK-Norther | 1 | 4 | #####    | ##### |  |
| 19 | 2 UK | 2020-15 | 5 UK-Norther | 1 | 5 | #####    | ##### |  |
| 20 | 2 UK | 2020-15 | 5 UK-Norther | 2 | 1 | #####    | ##### |  |
| 21 | 2 UK | 2020-15 | 5 UK-Norther | 2 | 3 | #####    | ##### |  |
| 22 | 2 UK | 2020-15 | 5 UK-Norther | 2 | 4 | 1.473684 | ##### |  |
| 23 | 2 UK | 2020-15 | 5 UK-Norther | 2 | 5 | #####    | ##### |  |
| 24 | 2 UK | 2020-15 | 5 UK-Norther | 3 | 1 | #####    | ##### |  |
| 25 | 2 UK | 2020-15 | 5 UK-Norther | 3 | 4 | #####    | ##### |  |
| 26 | 2 UK | 2020-15 | 5 UK-Norther | 3 | 5 | 0.375    | ##### |  |
| 27 | 2 UK | 2020-15 | 5 UK-Overall | 1 | 1 | #####    | ##### |  |
| 28 | 2 UK | 2020-15 | 5 UK-Overall | 1 | 2 | #####    | ##### |  |
| 29 | 2 UK | 2020-15 | 5 UK-Overall | 1 | 3 | #####    | ##### |  |
| 30 | 2 UK | 2020-15 | 5 UK-Overall | 1 | 4 | #####    | ##### |  |
| 31 | 2 UK | 2020-15 | 5 UK-Overall | 1 | 5 | #####    | ##### |  |
| 32 | 2 UK | 2020-15 | 5 UK-Overall | 2 | 1 | #####    | ##### |  |
| 33 | 2 UK | 2020-15 | 5 UK-Overall | 2 | 2 | #####    | ##### |  |
| 34 | 2 UK | 2020-15 | 5 UK-Overall | 2 | 3 | #####    | ##### |  |
| 35 | 2 UK | 2020-15 | 5 UK-Overall | 2 | 4 | #####    | ##### |  |
| 36 | 2 UK | 2020-15 | 5 UK-Overall | 2 | 5 | #####    | ##### |  |
| 37 | 2 UK | 2020-15 | 5 UK-Overall | 2 | 5 | #####    | ##### |  |
| 38 | 2 UK | 2020-15 | 5 UK-Overall | 3 | 1 | #####    | ##### |  |
| 39 | 2 UK | 2020-15 | 5 UK-Overall | 3 | 2 | #####    | ##### |  |
| 40 | 2 UK | 2020-15 | 5 UK-Overall | 3 | 3 | #####    | ##### |  |
| 41 | 2 UK | 2020-15 | 5 UK-Overall | 3 | 4 | #####    | ##### |  |
| 42 | 2 UK | 2020-15 | 5 UK-Overall | 3 | 5 | #####    | ##### |  |
| 43 | 2 UK | 2020-15 | 5 UK-Scotlan | 1 | 1 | #####    | ##### |  |
| 44 | 2 UK | 2020-15 | 5 UK-Scotlan | 1 | 2 | #####    | ##### |  |
| 45 | 2 UK | 2020-15 | 5 UK-Scotlan | 1 | 3 | #####    | ##### |  |
| 46 | 2 UK | 2020-15 | 5 UK-Scotlan | 1 | 4 | #####    | ##### |  |
| 47 | 2 UK | 2020-15 | 5 UK-Scotlan | 1 | 5 | #####    | ##### |  |
| 48 | 2 UK | 2020-15 | 5 UK-Scotlan | 2 | 1 | #####    | ##### |  |
| 49 | 2 UK | 2020-15 | 5 UK-Scotlan | 2 | 2 | 0.9      | ##### |  |
| 50 | 2 UK | 2020-15 | 5 UK-Scotlan | 2 | 3 | #####    | ##### |  |
| 51 | 2 UK | 2020-15 | 5 UK-Scotlan | 2 | 4 | #####    | ##### |  |
| 52 | 2 UK | 2020-15 | 5 UK-Scotlan | 2 | 5 | #####    | ##### |  |
| 53 | 2 UK | 2020-15 | 5 UK-Scotlan | 3 | 1 | #####    | ##### |  |
| 54 | 2 UK | 2020-15 | 5 UK-Scotlan | 3 | 2 | 0.5      | ##### |  |
| 55 | 2 UK | 2020-15 | 5 UK-Scotlan | 3 | 3 | #####    | ##### |  |
| 56 | 2 UK | 2020-15 | 5 UK-Scotlan | 3 | 4 | 1.208333 | ##### |  |
| 57 | 2 UK | 2020-15 | 5 UK-Scotlan | 3 | 5 | #####    | ##### |  |
| 58 | 2 UK | 2020-15 | 5 UK-Wales   | 1 | 1 | #####    | ##### |  |
| 59 | 2 UK | 2020-15 | 5 UK-Wales   | 1 | 2 | 0.25     | ##### |  |
| 60 |      |         |              |   |   |          |       |  |

|    |      |         |              |   |   |          |          |  |
|----|------|---------|--------------|---|---|----------|----------|--|
| 1  |      |         |              |   |   |          |          |  |
| 2  |      |         |              |   |   |          |          |  |
| 3  | 2 UK | 2020-15 | 5 UK-Wales   | 1 | 3 | #####    | #####    |  |
| 4  | 2 UK | 2020-15 | 5 UK-Wales   | 1 | 4 | #####    | #####    |  |
| 5  | 2 UK | 2020-15 | 5 UK-Wales   | 1 | 5 | #####    | #####    |  |
| 6  | 2 UK | 2020-15 | 5 UK-Wales   | 2 | 1 | #####    | #####    |  |
| 7  | 2 UK | 2020-15 | 5 UK-Wales   | 2 | 2 | 0.25     | #####    |  |
| 8  | 2 UK | 2020-15 | 5 UK-Wales   | 2 | 3 | #####    | #####    |  |
| 9  | 2 UK | 2020-15 | 5 UK-Wales   | 2 | 4 | #####    | #####    |  |
| 10 | 2 UK | 2020-15 | 5 UK-Wales   | 2 | 5 | #####    | #####    |  |
| 11 | 2 UK | 2020-15 | 5 UK-Wales   | 3 | 1 | #####    | #####    |  |
| 12 | 2 UK | 2020-15 | 5 UK-Wales   | 3 | 3 | #####    | #####    |  |
| 13 | 2 UK | 2020-15 | 5 UK-Wales   | 3 | 4 | #####    | #####    |  |
| 14 | 2 UK | 2020-15 | 5 UK-Wales   | 3 | 5 | 1        | #####    |  |
| 15 | 2 US | 2020-11 | 1 US-Midwes  | 1 | 1 | 6.592824 | #####    |  |
| 16 | 2 US | 2020-11 | 1 US-Midwes  | 1 | 2 | 7.921395 | 1.177134 |  |
| 17 | 2 US | 2020-11 | 1 US-Midwes  | 1 | 3 | 7.645767 | #####    |  |
| 18 | 2 US | 2020-11 | 1 US-Midwes  | 1 | 4 | 6.739977 | #####    |  |
| 19 | 2 US | 2020-11 | 1 US-Midwes  | 1 | 5 | 3.392366 | #####    |  |
| 20 | 2 US | 2020-11 | 1 US-Midwes  | 2 | 1 | 5.475628 | #####    |  |
| 21 | 2 US | 2020-11 | 1 US-Midwes  | 2 | 2 | 6.5      | #####    |  |
| 22 | 2 US | 2020-11 | 1 US-Midwes  | 2 | 3 | 6.52381  | #####    |  |
| 23 | 2 US | 2020-11 | 1 US-Midwes  | 2 | 4 | 6.113208 | #####    |  |
| 24 | 2 US | 2020-11 | 1 US-Midwes  | 2 | 5 | 2.8      | #####    |  |
| 25 | 2 US | 2020-11 | 1 US-Midwes  | 3 | 1 | 7.421298 | #####    |  |
| 26 | 2 US | 2020-11 | 1 US-Midwes  | 3 | 2 | 9.272727 | 2.081449 |  |
| 27 | 2 US | 2020-11 | 1 US-Midwes  | 3 | 3 | 8.25     | 1.309573 |  |
| 28 | 2 US | 2020-11 | 1 US-Midwes  | 3 | 4 | 7.132075 | #####    |  |
| 29 | 2 US | 2020-11 | 1 US-Midwes  | 3 | 5 | 4.069767 | #####    |  |
| 30 | 2 US | 2020-11 | 1 US-Northea | 1 | 1 | 6.082734 | #####    |  |
| 31 | 2 US | 2020-11 | 1 US-Northea | 1 | 2 | 5.751559 | #####    |  |
| 32 | 2 US | 2020-11 | 1 US-Northea | 1 | 3 | 8.390703 | 1.279303 |  |
| 33 | 2 US | 2020-11 | 1 US-Northea | 1 | 4 | 5.067525 | #####    |  |
| 34 | 2 US | 2020-11 | 1 US-Northea | 1 | 5 | 3.818001 | #####    |  |
| 35 | 2 US | 2020-11 | 1 US-Northea | 2 | 1 | 5.583374 | #####    |  |
| 36 | 2 US | 2020-11 | 1 US-Northea | 2 | 2 | 6.761905 | #####    |  |
| 37 | 2 US | 2020-11 | 1 US-Northea | 2 | 3 | 6.891892 | 1.249028 |  |
| 38 | 2 US | 2020-11 | 1 US-Northea | 2 | 4 | 4.6      | #####    |  |
| 39 | 2 US | 2020-11 | 1 US-Northea | 2 | 5 | 3.6      | #####    |  |
| 40 | 2 US | 2020-11 | 1 US-Northea | 3 | 1 | 6.542898 | #####    |  |
| 41 | 2 US | 2020-11 | 1 US-Northea | 3 | 2 | 4.75     | #####    |  |
| 42 | 2 US | 2020-11 | 1 US-Northea | 3 | 3 | 9.611111 | 2.056597 |  |
| 43 | 2 US | 2020-11 | 1 US-Northea | 3 | 4 | 5.375    | #####    |  |
| 44 | 2 US | 2020-11 | 1 US-Northea | 3 | 5 | 4.333333 | #####    |  |
| 45 | 2 US | 2020-11 | 1 US-Overall | 1 | 1 | 5.929241 | #####    |  |
| 46 | 2 US | 2020-11 | 1 US-Overall | 1 | 2 | 6.223083 | #####    |  |
| 47 | 2 US | 2020-11 | 1 US-Overall | 1 | 3 | 7.838044 | #####    |  |
| 48 | 2 US | 2020-11 | 1 US-Overall | 1 | 4 | 5.2859   | #####    |  |
| 49 | 2 US | 2020-11 | 1 US-Overall | 1 | 5 | 3.399676 | #####    |  |
| 50 | 2 US | 2020-11 | 1 US-Overall | 2 | 1 | 5.15582  | #####    |  |
| 51 | 2 US | 2020-11 | 1 US-Overall | 2 | 2 | 6.490719 | #####    |  |
| 52 | 2 US | 2020-11 | 1 US-Overall | 2 | 3 | 6.160036 | #####    |  |
| 53 | 2 US | 2020-11 | 1 US-Overall | 2 | 4 | 4.928312 | #####    |  |
| 54 | 2 US | 2020-11 | 1 US-Overall | 2 | 5 | 3.186434 | #####    |  |
| 55 | 2 US | 2020-11 | 1 US-Overall | 3 | 1 | 6.61624  | #####    |  |
| 56 | 2 US | 2020-11 | 1 US-Overall | 3 | 2 | 6.015127 | 1.199647 |  |
| 57 | 2 US | 2020-11 | 1 US-Overall | 3 | 3 | 8.988083 | #####    |  |
| 58 | 2 US | 2020-11 | 1 US-Overall | 3 | 4 | 5.613019 | #####    |  |
| 59 | 2 US | 2020-11 | 1 US-Overall | 3 |   |          |          |  |
| 60 | 2 US | 2020-11 | 1 US-Overall | 3 |   |          |          |  |

|    |      |         |              |   |   |          |          |  |
|----|------|---------|--------------|---|---|----------|----------|--|
| 1  |      |         |              |   |   |          |          |  |
| 2  |      |         |              |   |   |          |          |  |
| 3  | 2 US | 2020-11 | 1 US-Overall | 3 | 5 | 3.723608 | #####    |  |
| 4  | 2 US | 2020-11 | 1 US-South   | 1 | 1 | 5.716378 | #####    |  |
| 5  | 2 US | 2020-11 | 1 US-South   | 1 | 2 | 6.288236 | 1.672548 |  |
| 6  | 2 US | 2020-11 | 1 US-South   | 1 | 3 | 7.811024 | 1.364215 |  |
| 7  | 2 US | 2020-11 | 1 US-South   | 1 | 4 | 4.624366 | #####    |  |
| 8  | 2 US | 2020-11 | 1 US-South   | 1 | 5 | 3.465471 | #####    |  |
| 9  | 2 US | 2020-11 | 1 US-South   | 2 | 1 | 4.732847 | #####    |  |
| 10 | 2 US | 2020-11 | 1 US-South   | 2 | 2 | 5.9375   | 1.263938 |  |
| 11 | 2 US | 2020-11 | 1 US-South   | 2 | 3 | 5.842105 | 1.002479 |  |
| 12 | 2 US | 2020-11 | 1 US-South   | 2 | 4 | 4.433333 | #####    |  |
| 13 | 2 US | 2020-11 | 1 US-South   | 2 | 5 | 3.147059 | #####    |  |
| 14 | 2 US | 2020-11 | 1 US-South   | 3 | 1 | 6.720163 | 1.101052 |  |
| 15 | 2 US | 2020-11 | 1 US-South   | 3 | 2 | 6.5      | 2.570122 |  |
| 16 | 2 US | 2020-11 | 1 US-South   | 3 | 3 | 9.466667 | 2.311161 |  |
| 17 | 2 US | 2020-11 | 1 US-South   | 3 | 4 | 4.870968 | #####    |  |
| 18 | 2 US | 2020-11 | 1 US-South   | 3 | 5 | 4.028571 | #####    |  |
| 19 | 2 US | 2020-11 | 1 US-West    | 1 | 1 | 5.570283 | #####    |  |
| 20 | 2 US | 2020-11 | 1 US-West    | 1 | 2 | 4.967397 | #####    |  |
| 21 | 2 US | 2020-11 | 1 US-West    | 1 | 3 | 7.698297 | #####    |  |
| 22 | 2 US | 2020-11 | 1 US-West    | 1 | 4 | 5.102884 | #####    |  |
| 23 | 2 US | 2020-11 | 1 US-West    | 1 | 5 | 3.096207 | #####    |  |
| 24 | 2 US | 2020-11 | 1 US-West    | 2 | 1 | 5.299914 | #####    |  |
| 25 | 2 US | 2020-11 | 1 US-West    | 2 | 2 | 7        | 1.745193 |  |
| 26 | 2 US | 2020-11 | 1 US-West    | 2 | 3 | 5.875    | #####    |  |
| 27 | 2 US | 2020-11 | 1 US-West    | 2 | 4 | 5.112903 | #####    |  |
| 28 | 2 US | 2020-11 | 1 US-West    | 2 | 5 | 3.353846 | #####    |  |
| 29 | 2 US | 2020-11 | 1 US-West    | 3 | 1 | 5.793545 | #####    |  |
| 30 | 2 US | 2020-11 | 1 US-West    | 3 | 2 | 3.333333 | #####    |  |
| 31 | 2 US | 2020-11 | 1 US-West    | 3 | 3 | 8.724138 | 1.313929 |  |
| 32 | 2 US | 2020-11 | 1 US-West    | 3 | 4 | 5.093023 | #####    |  |
| 33 | 2 US | 2020-11 | 1 US-West    | 3 | 5 | 2.765957 | #####    |  |
| 34 | 2 US | 2020-11 | 2 US-Midwes  | 1 | 1 | 1.710631 | #####    |  |
| 35 | 2 US | 2020-11 | 2 US-Midwes  | 1 | 2 | 1.812413 | #####    |  |
| 36 | 2 US | 2020-11 | 2 US-Midwes  | 1 | 3 | 1.963607 | #####    |  |
| 37 | 2 US | 2020-11 | 2 US-Midwes  | 1 | 4 | 1.561911 | #####    |  |
| 38 | 2 US | 2020-11 | 2 US-Midwes  | 1 | 5 | 1.396664 | #####    |  |
| 39 | 2 US | 2020-11 | 2 US-Midwes  | 2 | 1 | 1.740077 | #####    |  |
| 40 | 2 US | 2020-11 | 2 US-Midwes  | 2 | 2 | 1.744681 | #####    |  |
| 41 | 2 US | 2020-11 | 2 US-Midwes  | 2 | 3 | 2.235294 | #####    |  |
| 42 | 2 US | 2020-11 | 2 US-Midwes  | 2 | 4 | 1.608696 | #####    |  |
| 43 | 2 US | 2020-11 | 2 US-Midwes  | 2 | 5 | 1.190476 | #####    |  |
| 44 | 2 US | 2020-11 | 2 US-Midwes  | 3 | 1 | 1.687834 | #####    |  |
| 45 | 2 US | 2020-11 | 2 US-Midwes  | 3 | 2 | 1.882353 | #####    |  |
| 46 | 2 US | 2020-11 | 2 US-Midwes  | 3 | 3 | 1.769231 | #####    |  |
| 47 | 2 US | 2020-11 | 2 US-Midwes  | 3 | 4 | 1.534247 | #####    |  |
| 48 | 2 US | 2020-11 | 2 US-Midwes  | 3 | 5 | 1.578125 | #####    |  |
| 49 | 2 US | 2020-11 | 2 US-Northe  | 1 | 1 | 1.77158  | #####    |  |
| 50 | 2 US | 2020-11 | 2 US-Northe  | 1 | 2 | 1.943475 | #####    |  |
| 51 | 2 US | 2020-11 | 2 US-Northe  | 1 | 3 | 2.033308 | #####    |  |
| 52 | 2 US | 2020-11 | 2 US-Northe  | 1 | 4 | 1.508585 | #####    |  |
| 53 | 2 US | 2020-11 | 2 US-Northe  | 1 | 5 | 1.274237 | #####    |  |
| 54 | 2 US | 2020-11 | 2 US-Northe  | 2 | 1 | 1.79063  | #####    |  |
| 55 | 2 US | 2020-11 | 2 US-Northe  | 2 | 2 | 2.105263 | #####    |  |
| 56 | 2 US | 2020-11 | 2 US-Northe  | 2 | 3 | 1.944444 | #####    |  |
| 57 | 2 US | 2020-11 | 2 US-Northe  | 2 | 4 | 1.589286 | #####    |  |
| 58 | 2 US | 2020-11 | 2 US-Northe  | 2 | 5 | 1.27907  | #####    |  |
| 59 | 2 US | 2020-11 | 2 US-Northe  | 2 |   |          |          |  |
| 60 | 2 US | 2020-11 | 2 US-Northe  | 2 |   |          |          |  |

|    |      |         |              |   |   |          |       |  |  |
|----|------|---------|--------------|---|---|----------|-------|--|--|
| 1  |      |         |              |   |   |          |       |  |  |
| 2  |      |         |              |   |   |          |       |  |  |
| 3  | 2 US | 2020-11 | 2 US-Northea | 3 | 1 | 1.754753 | ##### |  |  |
| 4  | 2 US | 2020-11 | 2 US-Northea | 3 | 2 | 1.75     | ##### |  |  |
| 5  | 2 US | 2020-11 | 2 US-Northea | 3 | 3 | 2.090909 | ##### |  |  |
| 6  | 2 US | 2020-11 | 2 US-Northea | 3 | 4 | 1.454545 | ##### |  |  |
| 7  | 2 US | 2020-11 | 2 US-Northea | 3 | 5 | 1.263158 | ##### |  |  |
| 8  | 2 US | 2020-11 | 2 US-Overall | 1 | 1 | 1.702459 | ##### |  |  |
| 9  | 2 US | 2020-11 | 2 US-Overall | 1 | 2 | 1.728178 | ##### |  |  |
| 10 | 2 US | 2020-11 | 2 US-Overall | 1 | 3 | 1.940327 | ##### |  |  |
| 11 | 2 US | 2020-11 | 2 US-Overall | 1 | 4 | 1.621493 | ##### |  |  |
| 12 | 2 US | 2020-11 | 2 US-Overall | 1 | 5 | 1.355694 | ##### |  |  |
| 13 | 2 US | 2020-11 | 2 US-Overall | 2 | 1 | 1.779436 | ##### |  |  |
| 14 | 2 US | 2020-11 | 2 US-Overall | 2 | 2 | 1.932225 | ##### |  |  |
| 15 | 2 US | 2020-11 | 2 US-Overall | 2 | 3 | 2.190784 | ##### |  |  |
| 16 | 2 US | 2020-11 | 2 US-Overall | 2 | 4 | 1.607556 | ##### |  |  |
| 17 | 2 US | 2020-11 | 2 US-Overall | 2 | 5 | 1.265843 | ##### |  |  |
| 18 | 2 US | 2020-11 | 2 US-Overall | 3 | 1 | 1.63631  | ##### |  |  |
| 19 | 2 US | 2020-11 | 2 US-Overall | 3 | 2 | 1.536016 | ##### |  |  |
| 20 | 2 US | 2020-11 | 2 US-Overall | 3 | 3 | 1.768505 | ##### |  |  |
| 21 | 2 US | 2020-11 | 2 US-Overall | 3 | 4 | 1.632979 | ##### |  |  |
| 22 | 2 US | 2020-11 | 2 US-Overall | 3 | 5 | 1.466551 | ##### |  |  |
| 23 | 2 US | 2020-11 | 2 US-South   | 1 | 1 | 1.707214 | ##### |  |  |
| 24 | 2 US | 2020-11 | 2 US-South   | 1 | 2 | 1.697171 | ##### |  |  |
| 25 | 2 US | 2020-11 | 2 US-South   | 1 | 3 | 1.906028 | ##### |  |  |
| 26 | 2 US | 2020-11 | 2 US-South   | 1 | 4 | 1.718171 | ##### |  |  |
| 27 | 2 US | 2020-11 | 2 US-South   | 1 | 5 | 1.382582 | ##### |  |  |
| 28 | 2 US | 2020-11 | 2 US-South   | 2 | 1 | 1.884174 | ##### |  |  |
| 29 | 2 US | 2020-11 | 2 US-South   | 2 | 2 | 2.130435 | ##### |  |  |
| 30 | 2 US | 2020-11 | 2 US-South   | 2 | 3 | 2.444444 | ##### |  |  |
| 31 | 2 US | 2020-11 | 2 US-South   | 2 | 4 | 1.666667 | ##### |  |  |
| 32 | 2 US | 2020-11 | 2 US-South   | 2 | 5 | 1.321839 | ##### |  |  |
| 33 | 2 US | 2020-11 | 2 US-South   | 3 | 1 | 1.555311 | ##### |  |  |
| 34 | 2 US | 2020-11 | 2 US-South   | 3 | 2 | 1.428571 | ##### |  |  |
| 35 | 2 US | 2020-11 | 2 US-South   | 3 | 3 | 1.52     | ##### |  |  |
| 36 | 2 US | 2020-11 | 2 US-South   | 3 | 4 | 1.767857 | ##### |  |  |
| 37 | 2 US | 2020-11 | 2 US-South   | 3 | 5 | 1.465517 | ##### |  |  |
| 38 | 2 US | 2020-11 | 2 US-West    | 1 | 1 | 1.643438 | ##### |  |  |
| 39 | 2 US | 2020-11 | 2 US-West    | 1 | 2 | 1.525405 | ##### |  |  |
| 40 | 2 US | 2020-11 | 2 US-West    | 1 | 3 | 1.91023  | ##### |  |  |
| 41 | 2 US | 2020-11 | 2 US-West    | 1 | 4 | 1.600754 | ##### |  |  |
| 42 | 2 US | 2020-11 | 2 US-West    | 1 | 5 | 1.307823 | ##### |  |  |
| 43 | 2 US | 2020-11 | 2 US-West    | 2 | 1 | 1.651506 | ##### |  |  |
| 44 | 2 US | 2020-11 | 2 US-West    | 2 | 2 | 1.761905 | ##### |  |  |
| 45 | 2 US | 2020-11 | 2 US-West    | 2 | 3 | 1.955224 | ##### |  |  |
| 46 | 2 US | 2020-11 | 2 US-West    | 2 | 4 | 1.527473 | ##### |  |  |
| 47 | 2 US | 2020-11 | 2 US-West    | 2 | 5 | 1.2125   | ##### |  |  |
| 48 | 2 US | 2020-11 | 2 US-West    | 3 | 1 | 1.636012 | ##### |  |  |
| 49 | 2 US | 2020-11 | 2 US-West    | 3 | 2 | 1.214286 | ##### |  |  |
| 50 | 2 US | 2020-11 | 2 US-West    | 3 | 3 | 1.880952 | ##### |  |  |
| 51 | 2 US | 2020-11 | 2 US-West    | 3 | 4 | 1.671875 | ##### |  |  |
| 52 | 2 US | 2020-11 | 2 US-West    | 3 | 5 | 1.411765 | ##### |  |  |
| 53 | 2 US | 2020-11 | 3 US-Midwes  | 1 | 1 | 0        | 0     |  |  |
| 54 | 2 US | 2020-11 | 3 US-Midwes  | 1 | 2 | 0        | 0     |  |  |
| 55 | 2 US | 2020-11 | 3 US-Midwes  | 1 | 3 | 0        | 0     |  |  |
| 56 | 2 US | 2020-11 | 3 US-Midwes  | 1 | 4 | 0        | 0     |  |  |
| 57 | 2 US | 2020-11 | 3 US-Midwes  | 1 | 5 | 0        | 0     |  |  |
| 58 | 2 US | 2020-11 | 3 US-Midwes  | 1 | 5 | 0        | 0     |  |  |
| 59 | 2 US | 2020-11 | 3 US-Midwes  | 2 | 1 | 0        | 0     |  |  |
| 60 | 2 US | 2020-11 | 3 US-Midwes  | 2 | 1 | 0        | 0     |  |  |

|    |      |         |              |   |   |   |   |
|----|------|---------|--------------|---|---|---|---|
| 1  |      |         |              |   |   |   |   |
| 2  |      |         |              |   |   |   |   |
| 3  | 2 US | 2020-11 | 3 US-Midwes  | 2 | 2 | 0 | 0 |
| 4  | 2 US | 2020-11 | 3 US-Midwes  | 2 | 3 | 0 | 0 |
| 5  | 2 US | 2020-11 | 3 US-Midwes  | 2 | 4 | 0 | 0 |
| 6  | 2 US | 2020-11 | 3 US-Midwes  | 2 | 5 | 0 | 0 |
| 7  | 2 US | 2020-11 | 3 US-Midwes  | 3 | 1 | 0 | 0 |
| 8  | 2 US | 2020-11 | 3 US-Midwes  | 3 | 2 | 0 | 0 |
| 9  | 2 US | 2020-11 | 3 US-Midwes  | 3 | 3 | 0 | 0 |
| 10 | 2 US | 2020-11 | 3 US-Midwes  | 3 | 4 | 0 | 0 |
| 11 | 2 US | 2020-11 | 3 US-Midwes  | 3 | 5 | 0 | 0 |
| 12 | 2 US | 2020-11 | 3 US-Northea | 1 | 1 | 0 | 0 |
| 13 | 2 US | 2020-11 | 3 US-Northea | 1 | 2 | 0 | 0 |
| 14 | 2 US | 2020-11 | 3 US-Northea | 1 | 3 | 0 | 0 |
| 15 | 2 US | 2020-11 | 3 US-Northea | 1 | 4 | 0 | 0 |
| 16 | 2 US | 2020-11 | 3 US-Northea | 1 | 5 | 0 | 0 |
| 17 | 2 US | 2020-11 | 3 US-Northea | 2 | 1 | 0 | 0 |
| 18 | 2 US | 2020-11 | 3 US-Northea | 2 | 2 | 0 | 0 |
| 19 | 2 US | 2020-11 | 3 US-Northea | 2 | 3 | 0 | 0 |
| 20 | 2 US | 2020-11 | 3 US-Northea | 2 | 4 | 0 | 0 |
| 21 | 2 US | 2020-11 | 3 US-Northea | 2 | 5 | 0 | 0 |
| 22 | 2 US | 2020-11 | 3 US-Northea | 3 | 1 | 0 | 0 |
| 23 | 2 US | 2020-11 | 3 US-Northea | 3 | 2 | 0 | 0 |
| 24 | 2 US | 2020-11 | 3 US-Northea | 3 | 3 | 0 | 0 |
| 25 | 2 US | 2020-11 | 3 US-Northea | 3 | 4 | 0 | 0 |
| 26 | 2 US | 2020-11 | 3 US-Northea | 3 | 5 | 0 | 0 |
| 27 | 2 US | 2020-11 | 3 US-Overall | 1 | 1 | 0 | 0 |
| 28 | 2 US | 2020-11 | 3 US-Overall | 1 | 2 | 0 | 0 |
| 29 | 2 US | 2020-11 | 3 US-Overall | 1 | 3 | 0 | 0 |
| 30 | 2 US | 2020-11 | 3 US-Overall | 1 | 4 | 0 | 0 |
| 31 | 2 US | 2020-11 | 3 US-Overall | 1 | 5 | 0 | 0 |
| 32 | 2 US | 2020-11 | 3 US-Overall | 2 | 1 | 0 | 0 |
| 33 | 2 US | 2020-11 | 3 US-Overall | 2 | 2 | 0 | 0 |
| 34 | 2 US | 2020-11 | 3 US-Overall | 2 | 3 | 0 | 0 |
| 35 | 2 US | 2020-11 | 3 US-Overall | 2 | 4 | 0 | 0 |
| 36 | 2 US | 2020-11 | 3 US-Overall | 2 | 5 | 0 | 0 |
| 37 | 2 US | 2020-11 | 3 US-Overall | 3 | 1 | 0 | 0 |
| 38 | 2 US | 2020-11 | 3 US-Overall | 3 | 2 | 0 | 0 |
| 39 | 2 US | 2020-11 | 3 US-Overall | 3 | 3 | 0 | 0 |
| 40 | 2 US | 2020-11 | 3 US-Overall | 3 | 4 | 0 | 0 |
| 41 | 2 US | 2020-11 | 3 US-Overall | 3 | 5 | 0 | 0 |
| 42 | 2 US | 2020-11 | 3 US-South   | 1 | 1 | 0 | 0 |
| 43 | 2 US | 2020-11 | 3 US-South   | 1 | 2 | 0 | 0 |
| 44 | 2 US | 2020-11 | 3 US-South   | 1 | 3 | 0 | 0 |
| 45 | 2 US | 2020-11 | 3 US-South   | 1 | 4 | 0 | 0 |
| 46 | 2 US | 2020-11 | 3 US-South   | 1 | 5 | 0 | 0 |
| 47 | 2 US | 2020-11 | 3 US-South   | 2 | 1 | 0 | 0 |
| 48 | 2 US | 2020-11 | 3 US-South   | 2 | 2 | 0 | 0 |
| 49 | 2 US | 2020-11 | 3 US-South   | 2 | 3 | 0 | 0 |
| 50 | 2 US | 2020-11 | 3 US-South   | 2 | 4 | 0 | 0 |
| 51 | 2 US | 2020-11 | 3 US-South   | 2 | 5 | 0 | 0 |
| 52 | 2 US | 2020-11 | 3 US-South   | 3 | 1 | 0 | 0 |
| 53 | 2 US | 2020-11 | 3 US-South   | 3 | 2 | 0 | 0 |
| 54 | 2 US | 2020-11 | 3 US-South   | 3 | 3 | 0 | 0 |
| 55 | 2 US | 2020-11 | 3 US-South   | 3 | 4 | 0 | 0 |
| 56 | 2 US | 2020-11 | 3 US-South   | 3 | 5 | 0 | 0 |
| 57 | 2 US | 2020-11 | 3 US-West    | 1 | 1 | 0 | 0 |
| 58 | 2 US | 2020-11 | 3 US-West    | 1 | 2 | 0 | 0 |
| 59 | 2 US | 2020-11 | 3 US-West    | 1 | 2 | 0 | 0 |
| 60 | 2 US | 2020-11 | 3 US-West    | 1 | 2 | 0 | 0 |

|    |      |         |              |   |   |          |          |  |
|----|------|---------|--------------|---|---|----------|----------|--|
| 1  |      |         |              |   |   |          |          |  |
| 2  |      |         |              |   |   |          |          |  |
| 3  | 2 US | 2020-11 | 3 US-West    | 1 | 3 | 0        | 0        |  |
| 4  | 2 US | 2020-11 | 3 US-West    | 1 | 4 | 0        | 0        |  |
| 5  | 2 US | 2020-11 | 3 US-West    | 1 | 5 | 0        | 0        |  |
| 6  | 2 US | 2020-11 | 3 US-West    | 2 | 1 | 0        | 0        |  |
| 7  | 2 US | 2020-11 | 3 US-West    | 2 | 2 | 0        | 0        |  |
| 8  | 2 US | 2020-11 | 3 US-West    | 2 | 3 | 0        | 0        |  |
| 9  | 2 US | 2020-11 | 3 US-West    | 2 | 4 | 0        | 0        |  |
| 10 | 2 US | 2020-11 | 3 US-West    | 2 | 5 | 0        | 0        |  |
| 11 | 2 US | 2020-11 | 3 US-West    | 3 | 1 | 0        | 0        |  |
| 12 | 2 US | 2020-11 | 3 US-West    | 3 | 2 | 0        | 0        |  |
| 13 | 2 US | 2020-11 | 3 US-West    | 3 | 3 | 0        | 0        |  |
| 14 | 2 US | 2020-11 | 3 US-West    | 3 | 4 | 0        | 0        |  |
| 15 | 2 US | 2020-11 | 3 US-West    | 3 | 5 | 0        | 0        |  |
| 16 | 2 US | 2020-11 | 4 US-Midwes  | 1 | 1 | 3.158607 | #####    |  |
| 17 | 2 US | 2020-11 | 4 US-Midwes  | 1 | 2 | 3.444406 | #####    |  |
| 18 | 2 US | 2020-11 | 4 US-Midwes  | 1 | 3 | 4.258126 | #####    |  |
| 19 | 2 US | 2020-11 | 4 US-Midwes  | 1 | 4 | 3.439187 | #####    |  |
| 20 | 2 US | 2020-11 | 4 US-Midwes  | 1 | 5 | #####    | #####    |  |
| 21 | 2 US | 2020-11 | 4 US-Midwes  | 2 | 1 | 2.348723 | #####    |  |
| 22 | 2 US | 2020-11 | 4 US-Midwes  | 2 | 2 | 2.644444 | #####    |  |
| 23 | 2 US | 2020-11 | 4 US-Midwes  | 2 | 3 | 3.088235 | #####    |  |
| 24 | 2 US | 2020-11 | 4 US-Midwes  | 2 | 4 | 2.72     | #####    |  |
| 25 | 2 US | 2020-11 | 4 US-Midwes  | 2 | 5 | #####    | #####    |  |
| 26 | 2 US | 2020-11 | 4 US-Midwes  | 3 | 1 | 3.748753 | #####    |  |
| 27 | 2 US | 2020-11 | 4 US-Midwes  | 3 | 2 | 4.235294 | 1.610002 |  |
| 28 | 2 US | 2020-11 | 4 US-Midwes  | 3 | 3 | 5        | #####    |  |
| 29 | 2 US | 2020-11 | 4 US-Midwes  | 3 | 4 | 3.871795 | #####    |  |
| 30 | 2 US | 2020-11 | 4 US-Midwes  | 3 | 5 | #####    | #####    |  |
| 31 | 2 US | 2020-11 | 4 US-Northea | 1 | 1 | 3.483875 | #####    |  |
| 32 | 2 US | 2020-11 | 4 US-Northea | 1 | 2 | 2.519947 | #####    |  |
| 33 | 2 US | 2020-11 | 4 US-Northea | 1 | 3 | 5.964754 | 1.084179 |  |
| 34 | 2 US | 2020-11 | 4 US-Northea | 1 | 4 | 2.714946 | #####    |  |
| 35 | 2 US | 2020-11 | 4 US-Northea | 1 | 5 | #####    | #####    |  |
| 36 | 2 US | 2020-11 | 4 US-Northea | 2 | 1 | 2.426936 | #####    |  |
| 37 | 2 US | 2020-11 | 4 US-Northea | 2 | 2 | 2.611111 | #####    |  |
| 38 | 2 US | 2020-11 | 4 US-Northea | 2 | 3 | 3.526316 | #####    |  |
| 39 | 2 US | 2020-11 | 4 US-Northea | 2 | 4 | 1.980769 | #####    |  |
| 40 | 2 US | 2020-11 | 4 US-Northea | 2 | 5 | 1.039216 | #####    |  |
| 41 | 2 US | 2020-11 | 4 US-Northea | 3 | 1 | 4.46385  | #####    |  |
| 42 | 2 US | 2020-11 | 4 US-Northea | 3 | 2 | 2.416667 | 1.578821 |  |
| 43 | 2 US | 2020-11 | 4 US-Northea | 3 | 3 | 7.8      | 1.725951 |  |
| 44 | 2 US | 2020-11 | 4 US-Northea | 3 | 4 | 3.188679 | #####    |  |
| 45 | 2 US | 2020-11 | 4 US-Northea | 3 | 5 | #####    | #####    |  |
| 46 | 2 US | 2020-11 | 4 US-Overall | 1 | 1 | 2.874064 | #####    |  |
| 47 | 2 US | 2020-11 | 4 US-Overall | 1 | 2 | 2.734656 | #####    |  |
| 48 | 2 US | 2020-11 | 4 US-Overall | 1 | 3 | 4.619446 | #####    |  |
| 49 | 2 US | 2020-11 | 4 US-Overall | 1 | 4 | 2.472584 | #####    |  |
| 50 | 2 US | 2020-11 | 4 US-Overall | 1 | 5 | #####    | #####    |  |
| 51 | 2 US | 2020-11 | 4 US-Overall | 2 | 1 | 2.001162 | #####    |  |
| 52 | 2 US | 2020-11 | 4 US-Overall | 2 | 2 | 2.638839 | #####    |  |
| 53 | 2 US | 2020-11 | 4 US-Overall | 2 | 3 | 2.74817  | #####    |  |
| 54 | 2 US | 2020-11 | 4 US-Overall | 2 | 4 | 1.725956 | #####    |  |
| 55 | 2 US | 2020-11 | 4 US-Overall | 2 | 5 | #####    | #####    |  |
| 56 | 2 US | 2020-11 | 4 US-Overall | 3 | 1 | 3.645009 | #####    |  |
| 57 | 2 US | 2020-11 | 4 US-Overall | 3 | 2 | 2.819252 | #####    |  |
| 58 | 2 US | 2020-11 | 4 US-Overall | 3 | 3 | 6.124459 | #####    |  |
| 59 | 2 US | 2020-11 | 4 US-Overall | 3 | 3 | 6.124459 | #####    |  |
| 60 | 2 US | 2020-11 | 4 US-Overall | 3 | 3 | 6.124459 | #####    |  |



|    |      |         |              |   |   |          |          |  |
|----|------|---------|--------------|---|---|----------|----------|--|
| 1  |      |         |              |   |   |          |          |  |
| 2  |      |         |              |   |   |          |          |  |
| 3  | 2 US | 2020-11 | 4 US-Overall | 3 | 4 | 3.073748 | #####    |  |
| 4  | 2 US | 2020-11 | 4 US-Overall | 3 | 5 | #####    | #####    |  |
| 5  | 2 US | 2020-11 | 4 US-South   | 1 | 1 | 2.528924 | #####    |  |
| 6  | 2 US | 2020-11 | 4 US-South   | 1 | 2 | 2.783143 | #####    |  |
| 7  | 2 US | 2020-11 | 4 US-South   | 1 | 3 | 4.551177 | 1.050013 |  |
| 8  | 2 US | 2020-11 | 4 US-South   | 1 | 4 | 1.62563  | #####    |  |
| 9  | 2 US | 2020-11 | 4 US-South   | 1 | 5 | #####    | #####    |  |
| 10 | 2 US | 2020-11 | 4 US-South   | 2 | 1 | 1.496356 | #####    |  |
| 11 | 2 US | 2020-11 | 4 US-South   | 2 | 2 | 2.148148 | #####    |  |
| 12 | 2 US | 2020-11 | 4 US-South   | 2 | 3 | 2.290323 | #####    |  |
| 13 | 2 US | 2020-11 | 4 US-South   | 2 | 4 | 1.084337 | #####    |  |
| 14 | 2 US | 2020-11 | 4 US-South   | 2 | 5 | #####    | #####    |  |
| 15 | 2 US | 2020-11 | 4 US-South   | 3 | 1 | 3.528431 | #####    |  |
| 16 | 2 US | 2020-11 | 4 US-South   | 3 | 2 | 3.1875   | 1.384169 |  |
| 17 | 2 US | 2020-11 | 4 US-South   | 3 | 3 | 7        | 1.935317 |  |
| 18 | 2 US | 2020-11 | 4 US-South   | 3 | 4 | 2.160714 | #####    |  |
| 19 | 2 US | 2020-11 | 4 US-South   | 3 | 5 | 1.130435 | #####    |  |
| 20 | 2 US | 2020-11 | 4 US-West    | 1 | 1 | 2.773326 | #####    |  |
| 21 | 2 US | 2020-11 | 4 US-West    | 1 | 2 | 2.187287 | #####    |  |
| 22 | 2 US | 2020-11 | 4 US-West    | 1 | 3 | 4.172147 | #####    |  |
| 23 | 2 US | 2020-11 | 4 US-West    | 1 | 4 | 2.77502  | #####    |  |
| 24 | 2 US | 2020-11 | 4 US-West    | 1 | 5 | #####    | #####    |  |
| 25 | 2 US | 2020-11 | 4 US-West    | 2 | 1 | 2.262124 | #####    |  |
| 26 | 2 US | 2020-11 | 4 US-West    | 2 | 2 | 3.243902 | 1.119225 |  |
| 27 | 2 US | 2020-11 | 4 US-West    | 2 | 3 | 2.72     | #####    |  |
| 28 | 2 US | 2020-11 | 4 US-West    | 2 | 4 | 1.940476 | #####    |  |
| 29 | 2 US | 2020-11 | 4 US-West    | 2 | 5 | #####    | #####    |  |
| 30 | 2 US | 2020-11 | 4 US-West    | 3 | 1 | 3.220345 | #####    |  |
| 31 | 2 US | 2020-11 | 4 US-West    | 3 | 2 | 1        | #####    |  |
| 32 | 2 US | 2020-11 | 4 US-West    | 3 | 3 | 5.181818 | #####    |  |
| 33 | 2 US | 2020-11 | 4 US-West    | 3 | 4 | 3.5      | #####    |  |
| 34 | 2 US | 2020-11 | 4 US-West    | 3 | 5 | 0.375    | #####    |  |
| 35 | 2 US | 2020-11 | 5 US-Midwes  | 1 | 1 | 1.951742 | #####    |  |
| 36 | 2 US | 2020-11 | 5 US-Midwes  | 1 | 2 | 2.405633 | #####    |  |
| 37 | 2 US | 2020-11 | 5 US-Midwes  | 1 | 3 | 1.71931  | #####    |  |
| 38 | 2 US | 2020-11 | 5 US-Midwes  | 1 | 4 | 1.919114 | #####    |  |
| 39 | 2 US | 2020-11 | 5 US-Midwes  | 1 | 5 | 1.714603 | #####    |  |
| 40 | 2 US | 2020-11 | 5 US-Midwes  | 2 | 1 | 1.702034 | #####    |  |
| 41 | 2 US | 2020-11 | 5 US-Midwes  | 2 | 2 | 2.225    | #####    |  |
| 42 | 2 US | 2020-11 | 5 US-Midwes  | 2 | 3 | 1.436364 | #####    |  |
| 43 | 2 US | 2020-11 | 5 US-Midwes  | 2 | 4 | 1.575758 | #####    |  |
| 44 | 2 US | 2020-11 | 5 US-Midwes  | 2 | 5 | 1.5      | #####    |  |
| 45 | 2 US | 2020-11 | 5 US-Midwes  | 3 | 1 | 2.1383   | #####    |  |
| 46 | 2 US | 2020-11 | 5 US-Midwes  | 3 | 2 | 2.555556 | #####    |  |
| 47 | 2 US | 2020-11 | 5 US-Midwes  | 3 | 3 | 1.891892 | #####    |  |
| 48 | 2 US | 2020-11 | 5 US-Midwes  | 3 | 4 | 2.140625 | #####    |  |
| 49 | 2 US | 2020-11 | 5 US-Midwes  | 3 | 5 | 1.956522 | #####    |  |
| 50 | 2 US | 2020-11 | 5 US-Northe  | 1 | 1 | 1.903519 | #####    |  |
| 51 | 2 US | 2020-11 | 5 US-Northe  | 1 | 2 | 2.226806 | #####    |  |
| 52 | 2 US | 2020-11 | 5 US-Northe  | 1 | 3 | 1.707168 | #####    |  |
| 53 | 2 US | 2020-11 | 5 US-Northe  | 1 | 4 | 1.869197 | #####    |  |
| 54 | 2 US | 2020-11 | 5 US-Northe  | 1 | 5 | 1.759791 | #####    |  |
| 55 | 2 US | 2020-11 | 5 US-Northe  | 2 | 1 | 1.639011 | #####    |  |
| 56 | 2 US | 2020-11 | 5 US-Northe  | 2 | 2 | 2.171429 | #####    |  |
| 57 | 2 US | 2020-11 | 5 US-Northe  | 2 | 3 | 1.26     | #####    |  |
| 58 | 2 US | 2020-11 | 5 US-Northe  | 2 | 4 | 1.577778 | #####    |  |
| 59 | 2 US | 2020-11 | 5 US-Northe  | 2 |   |          |          |  |
| 60 | 2 US | 2020-11 | 5 US-Northe  | 2 |   |          |          |  |

|    |      |         |              |   |   |          |       |  |
|----|------|---------|--------------|---|---|----------|-------|--|
| 1  |      |         |              |   |   |          |       |  |
| 2  |      |         |              |   |   |          |       |  |
| 3  | 2 US | 2020-11 | 5 US-Northea | 2 | 5 | 1.439024 | ##### |  |
| 4  | 2 US | 2020-11 | 5 US-Northea | 3 | 1 | 2.189148 | ##### |  |
| 5  | 2 US | 2020-11 | 5 US-Northea | 3 | 2 | 2.3      | ##### |  |
| 6  | 2 US | 2020-11 | 5 US-Northea | 3 | 3 | 2.15     | ##### |  |
| 7  | 2 US | 2020-11 | 5 US-Northea | 3 | 4 | 2.069767 | ##### |  |
| 8  | 2 US | 2020-11 | 5 US-Northea | 3 | 5 | 2.5      | ##### |  |
| 9  | 2 US | 2020-11 | 5 US-Overall | 1 | 1 | 1.819432 | ##### |  |
| 10 | 2 US | 2020-11 | 5 US-Overall | 1 | 2 | 1.866044 | ##### |  |
| 11 | 2 US | 2020-11 | 5 US-Overall | 1 | 3 | 1.855483 | ##### |  |
| 12 | 2 US | 2020-11 | 5 US-Overall | 1 | 4 | 1.814397 | ##### |  |
| 13 | 2 US | 2020-11 | 5 US-Overall | 1 | 5 | 1.685418 | ##### |  |
| 14 | 2 US | 2020-11 | 5 US-Overall | 2 | 1 | 1.703512 | ##### |  |
| 15 | 2 US | 2020-11 | 5 US-Overall | 2 | 2 | 1.910763 | ##### |  |
| 16 | 2 US | 2020-11 | 5 US-Overall | 2 | 3 | 1.626543 | ##### |  |
| 17 | 2 US | 2020-11 | 5 US-Overall | 2 | 4 | 1.754576 | ##### |  |
| 18 | 2 US | 2020-11 | 5 US-Overall | 2 | 5 | 1.502224 | ##### |  |
| 19 | 2 US | 2020-11 | 5 US-Overall | 3 | 1 | 1.922707 | ##### |  |
| 20 | 2 US | 2020-11 | 5 US-Overall | 3 | 2 | 1.828051 | ##### |  |
| 21 | 2 US | 2020-11 | 5 US-Overall | 3 | 3 | 2.021301 | ##### |  |
| 22 | 2 US | 2020-11 | 5 US-Overall | 3 | 4 | 1.866558 | ##### |  |
| 23 | 2 US | 2020-11 | 5 US-Overall | 3 | 5 | 1.957133 | ##### |  |
| 24 | 2 US | 2020-11 | 5 US-South   | 1 | 1 | 1.809722 | ##### |  |
| 25 | 2 US | 2020-11 | 5 US-South   | 1 | 2 | 1.513944 | ##### |  |
| 26 | 2 US | 2020-11 | 5 US-South   | 1 | 3 | 2.086024 | ##### |  |
| 27 | 2 US | 2020-11 | 5 US-South   | 1 | 4 | 1.782276 | ##### |  |
| 28 | 2 US | 2020-11 | 5 US-South   | 1 | 5 | 1.764592 | ##### |  |
| 29 | 2 US | 2020-11 | 5 US-South   | 2 | 1 | 1.728297 | ##### |  |
| 30 | 2 US | 2020-11 | 5 US-South   | 2 | 2 | 1.826087 | ##### |  |
| 31 | 2 US | 2020-11 | 5 US-South   | 2 | 3 | 1.784314 | ##### |  |
| 32 | 2 US | 2020-11 | 5 US-South   | 2 | 4 | 1.859375 | ##### |  |
| 33 | 2 US | 2020-11 | 5 US-South   | 2 | 5 | 1.443038 | ##### |  |
| 34 | 2 US | 2020-11 | 5 US-South   | 3 | 1 | 1.882703 | ##### |  |
| 35 | 2 US | 2020-11 | 5 US-South   | 3 | 2 | 1.333333 | ##### |  |
| 36 | 2 US | 2020-11 | 5 US-South   | 3 | 3 | 2.318182 | ##### |  |
| 37 | 2 US | 2020-11 | 5 US-South   | 3 | 4 | 1.7      | ##### |  |
| 38 | 2 US | 2020-11 | 5 US-South   | 3 | 5 | 2.302326 | ##### |  |
| 39 | 2 US | 2020-11 | 5 US-West    | 1 | 1 | 1.67153  | ##### |  |
| 40 | 2 US | 2020-11 | 5 US-West    | 1 | 2 | 1.674329 | ##### |  |
| 41 | 2 US | 2020-11 | 5 US-West    | 1 | 3 | 1.71465  | ##### |  |
| 42 | 2 US | 2020-11 | 5 US-West    | 1 | 4 | 1.727246 | ##### |  |
| 43 | 2 US | 2020-11 | 5 US-West    | 1 | 5 | 1.470195 | ##### |  |
| 44 | 2 US | 2020-11 | 5 US-West    | 2 | 1 | 1.710584 | ##### |  |
| 45 | 2 US | 2020-11 | 5 US-West    | 2 | 2 | 1.564103 | ##### |  |
| 46 | 2 US | 2020-11 | 5 US-West    | 2 | 3 | 1.762712 | ##### |  |
| 47 | 2 US | 2020-11 | 5 US-West    | 2 | 4 | 1.826667 | ##### |  |
| 48 | 2 US | 2020-11 | 5 US-West    | 2 | 5 | 1.671642 | ##### |  |
| 49 | 2 US | 2020-11 | 5 US-West    | 3 | 1 | 1.636006 | ##### |  |
| 50 | 2 US | 2020-11 | 5 US-West    | 3 | 2 | 1.8      | ##### |  |
| 51 | 2 US | 2020-11 | 5 US-West    | 3 | 3 | 1.684211 | ##### |  |
| 52 | 2 US | 2020-11 | 5 US-West    | 3 | 4 | 1.627451 | ##### |  |
| 53 | 2 US | 2020-11 | 5 US-West    | 3 | 5 | 1.22     | ##### |  |
| 54 | 2 US | 2020-12 | 1 US-Midwes  | 1 | 1 | 4.819652 | ##### |  |
| 55 | 2 US | 2020-12 | 1 US-Midwes  | 1 | 2 | 5.91531  | ##### |  |
| 56 | 2 US | 2020-12 | 1 US-Midwes  | 1 | 3 | 5.932828 | ##### |  |
| 57 | 2 US | 2020-12 | 1 US-Midwes  | 1 | 4 | 3.011957 | ##### |  |
| 58 | 2 US | 2020-12 | 1 US-Midwes  | 1 | 5 | 2.738753 | ##### |  |
| 59 | 2 US | 2020-12 | 1 US-Midwes  | 1 |   |          |       |  |
| 60 | 2 US | 2020-12 | 1 US-Midwes  | 1 |   |          |       |  |

|    |      |         |              |   |   |          |          |  |
|----|------|---------|--------------|---|---|----------|----------|--|
| 1  |      |         |              |   |   |          |          |  |
| 2  |      |         |              |   |   |          |          |  |
| 3  | 2 US | 2020-12 | 1 US-Midwes  | 2 | 1 | 4.319814 | #####    |  |
| 4  | 2 US | 2020-12 | 1 US-Midwes  | 2 | 2 | 4.882353 | #####    |  |
| 5  | 2 US | 2020-12 | 1 US-Midwes  | 2 | 3 | 5.848101 | #####    |  |
| 6  | 2 US | 2020-12 | 1 US-Midwes  | 2 | 4 | 2.808824 | #####    |  |
| 7  | 2 US | 2020-12 | 1 US-Midwes  | 2 | 5 | 2.781818 | #####    |  |
| 8  | 2 US | 2020-12 | 1 US-Midwes  | 3 | 1 | 5.313194 | #####    |  |
| 9  | 2 US | 2020-12 | 1 US-Midwes  | 3 | 2 | 6.44     | 1.262531 |  |
| 10 | 2 US | 2020-12 | 1 US-Midwes  | 3 | 3 | 6.038462 | 1.345087 |  |
| 11 | 2 US | 2020-12 | 1 US-Midwes  | 3 | 4 | 3.3      | #####    |  |
| 12 | 2 US | 2020-12 | 1 US-Midwes  | 3 | 5 | 2.676471 | #####    |  |
| 13 | 2 US | 2020-12 | 1 US-Northea | 1 | 1 | 4.502168 | #####    |  |
| 14 | 2 US | 2020-12 | 1 US-Northea | 1 | 2 | 5.630539 | 1.154573 |  |
| 15 | 2 US | 2020-12 | 1 US-Northea | 1 | 3 | 4.959313 | #####    |  |
| 16 | 2 US | 2020-12 | 1 US-Northea | 1 | 4 | 4.062515 | #####    |  |
| 17 | 2 US | 2020-12 | 1 US-Northea | 1 | 5 | 2.141738 | #####    |  |
| 18 | 2 US | 2020-12 | 1 US-Northea | 2 | 1 | 4.167084 | #####    |  |
| 19 | 2 US | 2020-12 | 1 US-Northea | 2 | 2 | 4.342857 | #####    |  |
| 20 | 2 US | 2020-12 | 1 US-Northea | 2 | 3 | 5.285714 | #####    |  |
| 21 | 2 US | 2020-12 | 1 US-Northea | 2 | 4 | 3.519481 | #####    |  |
| 22 | 2 US | 2020-12 | 1 US-Northea | 2 | 5 | 2.214286 | #####    |  |
| 23 | 2 US | 2020-12 | 1 US-Northea | 3 | 1 | 4.835412 | #####    |  |
| 24 | 2 US | 2020-12 | 1 US-Northea | 3 | 2 | 6.526316 | 1.880678 |  |
| 25 | 2 US | 2020-12 | 1 US-Northea | 3 | 3 | 4.571429 | #####    |  |
| 26 | 2 US | 2020-12 | 1 US-Northea | 3 | 4 | 4.75     | #####    |  |
| 27 | 2 US | 2020-12 | 1 US-Northea | 3 | 5 | 2.08     | #####    |  |
| 28 | 2 US | 2020-12 | 1 US-Overall | 1 | 1 | 4.74759  | #####    |  |
| 29 | 2 US | 2020-12 | 1 US-Overall | 1 | 2 | 5.204146 | #####    |  |
| 30 | 2 US | 2020-12 | 1 US-Overall | 1 | 3 | 5.457423 | #####    |  |
| 31 | 2 US | 2020-12 | 1 US-Overall | 1 | 4 | 4.484272 | #####    |  |
| 32 | 2 US | 2020-12 | 1 US-Overall | 1 | 5 | 2.428018 | #####    |  |
| 33 | 2 US | 2020-12 | 1 US-Overall | 2 | 1 | 4.384389 | #####    |  |
| 34 | 2 US | 2020-12 | 1 US-Overall | 2 | 2 | 4.983472 | #####    |  |
| 35 | 2 US | 2020-12 | 1 US-Overall | 2 | 3 | 4.915352 | #####    |  |
| 36 | 2 US | 2020-12 | 1 US-Overall | 2 | 4 | 4.4025   | #####    |  |
| 37 | 2 US | 2020-12 | 1 US-Overall | 2 | 5 | 2.436818 | #####    |  |
| 38 | 2 US | 2020-12 | 1 US-Overall | 3 | 1 | 5.080968 | #####    |  |
| 39 | 2 US | 2020-12 | 1 US-Overall | 3 | 2 | 5.368537 | #####    |  |
| 40 | 2 US | 2020-12 | 1 US-Overall | 3 | 3 | 5.869659 | #####    |  |
| 41 | 2 US | 2020-12 | 1 US-Overall | 3 | 4 | 4.583962 | #####    |  |
| 42 | 2 US | 2020-12 | 1 US-Overall | 3 | 5 | 2.415688 | #####    |  |
| 43 | 2 US | 2020-12 | 1 US-South   | 1 | 1 | 4.525741 | #####    |  |
| 44 | 2 US | 2020-12 | 1 US-South   | 1 | 2 | 4.148102 | #####    |  |
| 45 | 2 US | 2020-12 | 1 US-South   | 1 | 3 | 5.121848 | #####    |  |
| 46 | 2 US | 2020-12 | 1 US-South   | 1 | 4 | 5.031471 | #####    |  |
| 47 | 2 US | 2020-12 | 1 US-South   | 1 | 5 | 2.527119 | #####    |  |
| 48 | 2 US | 2020-12 | 1 US-South   | 2 | 1 | 4.369975 | #####    |  |
| 49 | 2 US | 2020-12 | 1 US-South   | 2 | 2 | 4.928571 | #####    |  |
| 50 | 2 US | 2020-12 | 1 US-South   | 2 | 3 | 3.642857 | #####    |  |
| 51 | 2 US | 2020-12 | 1 US-South   | 2 | 4 | 5.566265 | #####    |  |
| 52 | 2 US | 2020-12 | 1 US-South   | 2 | 5 | 2.575758 | #####    |  |
| 53 | 2 US | 2020-12 | 1 US-South   | 3 | 1 | 4.658672 | #####    |  |
| 54 | 2 US | 2020-12 | 1 US-South   | 3 | 2 | 3.375    | #####    |  |
| 55 | 2 US | 2020-12 | 1 US-South   | 3 | 3 | 5.864865 | 1.00344  |  |
| 56 | 2 US | 2020-12 | 1 US-South   | 3 | 4 | 4.45098  | #####    |  |
| 57 | 2 US | 2020-12 | 1 US-South   | 3 | 5 | 2.441176 | #####    |  |
| 58 | 2 US | 2020-12 | 1 US-South   | 3 | 5 | 2.441176 | #####    |  |
| 59 | 2 US | 2020-12 | 1 US-South   | 3 | 5 | 2.441176 | #####    |  |
| 60 | 2 US | 2020-12 | 1 US-West    | 1 | 1 | 5.397587 | #####    |  |

|    |      |         |              |   |   |          |          |  |
|----|------|---------|--------------|---|---|----------|----------|--|
| 1  |      |         |              |   |   |          |          |  |
| 2  |      |         |              |   |   |          |          |  |
| 3  | 2 US | 2020-12 | 1 US-West    | 1 | 2 | 6.252042 | #####    |  |
| 4  | 2 US | 2020-12 | 1 US-West    | 1 | 3 | 6.263667 | #####    |  |
| 5  | 2 US | 2020-12 | 1 US-West    | 1 | 4 | 4.860879 | #####    |  |
| 6  | 2 US | 2020-12 | 1 US-West    | 1 | 5 | 2.231571 | #####    |  |
| 7  | 2 US | 2020-12 | 1 US-West    | 2 | 1 | 4.691777 | #####    |  |
| 8  | 2 US | 2020-12 | 1 US-West    | 2 | 2 | 5.862069 | 1.056953 |  |
| 9  | 2 US | 2020-12 | 1 US-West    | 2 | 3 | 5.677419 | #####    |  |
| 10 | 2 US | 2020-12 | 1 US-West    | 2 | 4 | 4.181818 | #####    |  |
| 11 | 2 US | 2020-12 | 1 US-West    | 2 | 5 | 2        | #####    |  |
| 12 | 2 US | 2020-12 | 1 US-West    | 3 | 1 | 6.053731 | #####    |  |
| 13 | 2 US | 2020-12 | 1 US-West    | 3 | 2 | 6.5      | 1.450058 |  |
| 14 | 2 US | 2020-12 | 1 US-West    | 3 | 3 | 6.741935 | #####    |  |
| 15 | 2 US | 2020-12 | 1 US-West    | 3 | 4 | 5.787879 | 1.1609   |  |
| 16 | 2 US | 2020-12 | 1 US-West    | 3 | 5 | 2.583333 | #####    |  |
| 17 | 2 US | 2020-12 | 2 US-Midwes  | 1 | 1 | 1.705075 | #####    |  |
| 18 | 2 US | 2020-12 | 2 US-Midwes  | 1 | 2 | 1.798197 | #####    |  |
| 19 | 2 US | 2020-12 | 2 US-Midwes  | 1 | 3 | 1.918459 | #####    |  |
| 20 | 2 US | 2020-12 | 2 US-Midwes  | 1 | 4 | 1.537266 | #####    |  |
| 21 | 2 US | 2020-12 | 2 US-Midwes  | 1 | 5 | 1.265735 | #####    |  |
| 22 | 2 US | 2020-12 | 2 US-Midwes  | 2 | 1 | 1.755987 | #####    |  |
| 23 | 2 US | 2020-12 | 2 US-Midwes  | 2 | 2 | 2.044444 | #####    |  |
| 24 | 2 US | 2020-12 | 2 US-Midwes  | 2 | 3 | 2.032609 | #####    |  |
| 25 | 2 US | 2020-12 | 2 US-Midwes  | 2 | 4 | 1.488095 | #####    |  |
| 26 | 2 US | 2020-12 | 2 US-Midwes  | 2 | 5 | 1.172414 | #####    |  |
| 27 | 2 US | 2020-12 | 2 US-Midwes  | 3 | 1 | 1.658933 | #####    |  |
| 28 | 2 US | 2020-12 | 2 US-Midwes  | 3 | 2 | 1.676471 | #####    |  |
| 29 | 2 US | 2020-12 | 2 US-Midwes  | 3 | 3 | 1.787879 | #####    |  |
| 30 | 2 US | 2020-12 | 2 US-Midwes  | 3 | 4 | 1.605263 | #####    |  |
| 31 | 2 US | 2020-12 | 2 US-Midwes  | 3 | 5 | 1.380952 | #####    |  |
| 32 | 2 US | 2020-12 | 2 US-Northea | 1 | 1 | 1.835847 | #####    |  |
| 33 | 2 US | 2020-12 | 2 US-Northea | 1 | 2 | 2.036815 | #####    |  |
| 34 | 2 US | 2020-12 | 2 US-Northea | 1 | 3 | 2.120791 | #####    |  |
| 35 | 2 US | 2020-12 | 2 US-Northea | 1 | 4 | 1.681386 | #####    |  |
| 36 | 2 US | 2020-12 | 2 US-Northea | 1 | 5 | 1.068071 | #####    |  |
| 37 | 2 US | 2020-12 | 2 US-Northea | 2 | 1 | 1.831044 | #####    |  |
| 38 | 2 US | 2020-12 | 2 US-Northea | 2 | 2 | 2.2      | #####    |  |
| 39 | 2 US | 2020-12 | 2 US-Northea | 2 | 3 | 2.166667 | #####    |  |
| 40 | 2 US | 2020-12 | 2 US-Northea | 2 | 4 | 1.5      | #####    |  |
| 41 | 2 US | 2020-12 | 2 US-Northea | 2 | 5 | #####    | #####    |  |
| 42 | 2 US | 2020-12 | 2 US-Northea | 3 | 1 | 1.840961 | #####    |  |
| 43 | 2 US | 2020-12 | 2 US-Northea | 3 | 2 | 1.904762 | #####    |  |
| 44 | 2 US | 2020-12 | 2 US-Northea | 3 | 3 | 2.064516 | #####    |  |
| 45 | 2 US | 2020-12 | 2 US-Northea | 3 | 4 | 1.914894 | #####    |  |
| 46 | 2 US | 2020-12 | 2 US-Northea | 3 | 5 | 1.150943 | #####    |  |
| 47 | 2 US | 2020-12 | 2 US-Overall | 1 | 1 | 1.755234 | #####    |  |
| 48 | 2 US | 2020-12 | 2 US-Overall | 1 | 2 | 1.908197 | #####    |  |
| 49 | 2 US | 2020-12 | 2 US-Overall | 1 | 3 | 1.865839 | #####    |  |
| 50 | 2 US | 2020-12 | 2 US-Overall | 1 | 4 | 1.66485  | #####    |  |
| 51 | 2 US | 2020-12 | 2 US-Overall | 1 | 5 | 1.252402 | #####    |  |
| 52 | 2 US | 2020-12 | 2 US-Overall | 2 | 1 | 1.766125 | #####    |  |
| 53 | 2 US | 2020-12 | 2 US-Overall | 2 | 2 | 1.998626 | #####    |  |
| 54 | 2 US | 2020-12 | 2 US-Overall | 2 | 3 | 2.045028 | #####    |  |
| 55 | 2 US | 2020-12 | 2 US-Overall | 2 | 4 | 1.536815 | #####    |  |
| 56 | 2 US | 2020-12 | 2 US-Overall | 2 | 5 | 1.156025 | #####    |  |
| 57 | 2 US | 2020-12 | 2 US-Overall | 3 | 1 | 1.745591 | #####    |  |
| 58 | 2 US | 2020-12 | 2 US-Overall | 3 | 2 | 1.842361 | #####    |  |
| 59 | 2 US | 2020-12 | 2 US-Overall | 3 |   |          |          |  |
| 60 | 2 US | 2020-12 | 2 US-Overall | 3 |   |          |          |  |

|    |      |         |              |   |   |          |       |  |  |
|----|------|---------|--------------|---|---|----------|-------|--|--|
| 1  |      |         |              |   |   |          |       |  |  |
| 2  |      |         |              |   |   |          |       |  |  |
| 3  | 2 US | 2020-12 | 2 US-Overall | 3 | 3 | 1.728492 | ##### |  |  |
| 4  | 2 US | 2020-12 | 2 US-Overall | 3 | 4 | 1.816464 | ##### |  |  |
| 5  | 2 US | 2020-12 | 2 US-Overall | 3 | 5 | 1.371225 | ##### |  |  |
| 6  | 2 US | 2020-12 | 2 US-South   | 1 | 1 | 1.75552  | ##### |  |  |
| 7  | 2 US | 2020-12 | 2 US-South   | 1 | 2 | 1.893589 | ##### |  |  |
| 8  | 2 US | 2020-12 | 2 US-South   | 1 | 3 | 1.771585 | ##### |  |  |
| 9  | 2 US | 2020-12 | 2 US-South   | 1 | 4 | 1.736659 | ##### |  |  |
| 10 | 2 US | 2020-12 | 2 US-South   | 1 | 5 | 1.38051  | ##### |  |  |
| 11 | 2 US | 2020-12 | 2 US-South   | 2 | 1 | 1.779585 | ##### |  |  |
| 12 | 2 US | 2020-12 | 2 US-South   | 2 | 2 | 1.925926 | ##### |  |  |
| 13 | 2 US | 2020-12 | 2 US-South   | 2 | 3 | 2.057143 | ##### |  |  |
| 14 | 2 US | 2020-12 | 2 US-South   | 2 | 4 | 1.577778 | ##### |  |  |
| 15 | 2 US | 2020-12 | 2 US-South   | 2 | 5 | 1.279412 | ##### |  |  |
| 16 | 2 US | 2020-12 | 2 US-South   | 3 | 1 | 1.735371 | ##### |  |  |
| 17 | 2 US | 2020-12 | 2 US-South   | 3 | 2 | 1.863636 | ##### |  |  |
| 18 | 2 US | 2020-12 | 2 US-South   | 3 | 3 | 1.609756 | ##### |  |  |
| 19 | 2 US | 2020-12 | 2 US-South   | 3 | 4 | 1.898305 | ##### |  |  |
| 20 | 2 US | 2020-12 | 2 US-South   | 3 | 5 | 1.522727 | ##### |  |  |
| 21 | 2 US | 2020-12 | 2 US-South   | 3 | 5 | 1.522727 | ##### |  |  |
| 22 | 2 US | 2020-12 | 2 US-West    | 1 | 1 | 1.726267 | ##### |  |  |
| 23 | 2 US | 2020-12 | 2 US-West    | 1 | 2 | 1.940036 | ##### |  |  |
| 24 | 2 US | 2020-12 | 2 US-West    | 1 | 3 | 1.804991 | ##### |  |  |
| 25 | 2 US | 2020-12 | 2 US-West    | 1 | 4 | 1.597037 | ##### |  |  |
| 26 | 2 US | 2020-12 | 2 US-West    | 1 | 5 | 1.193084 | ##### |  |  |
| 27 | 2 US | 2020-12 | 2 US-West    | 2 | 1 | 1.681731 | ##### |  |  |
| 28 | 2 US | 2020-12 | 2 US-West    | 2 | 2 | 1.95122  | ##### |  |  |
| 29 | 2 US | 2020-12 | 2 US-West    | 2 | 3 | 1.893939 | ##### |  |  |
| 30 | 2 US | 2020-12 | 2 US-West    | 2 | 4 | 1.538462 | ##### |  |  |
| 31 | 2 US | 2020-12 | 2 US-West    | 2 | 5 | 1.061538 | ##### |  |  |
| 32 | 2 US | 2020-12 | 2 US-West    | 3 | 1 | 1.762892 | ##### |  |  |
| 33 | 2 US | 2020-12 | 2 US-West    | 3 | 2 | 1.933333 | ##### |  |  |
| 34 | 2 US | 2020-12 | 2 US-West    | 3 | 3 | 1.74359  | ##### |  |  |
| 35 | 2 US | 2020-12 | 2 US-West    | 3 | 4 | 1.675    | ##### |  |  |
| 36 | 2 US | 2020-12 | 2 US-West    | 3 | 5 | 1.361702 | ##### |  |  |
| 37 | 2 US | 2020-12 | 3 US-Midwes  | 1 | 1 | 0        | 0     |  |  |
| 38 | 2 US | 2020-12 | 3 US-Midwes  | 1 | 2 | 0        | 0     |  |  |
| 39 | 2 US | 2020-12 | 3 US-Midwes  | 1 | 3 | 0        | 0     |  |  |
| 40 | 2 US | 2020-12 | 3 US-Midwes  | 1 | 4 | 0        | 0     |  |  |
| 41 | 2 US | 2020-12 | 3 US-Midwes  | 1 | 5 | 0        | 0     |  |  |
| 42 | 2 US | 2020-12 | 3 US-Midwes  | 2 | 1 | 0        | 0     |  |  |
| 43 | 2 US | 2020-12 | 3 US-Midwes  | 2 | 2 | 0        | 0     |  |  |
| 44 | 2 US | 2020-12 | 3 US-Midwes  | 2 | 3 | 0        | 0     |  |  |
| 45 | 2 US | 2020-12 | 3 US-Midwes  | 2 | 4 | 0        | 0     |  |  |
| 46 | 2 US | 2020-12 | 3 US-Midwes  | 2 | 5 | 0        | 0     |  |  |
| 47 | 2 US | 2020-12 | 3 US-Midwes  | 3 | 1 | 0        | 0     |  |  |
| 48 | 2 US | 2020-12 | 3 US-Midwes  | 3 | 2 | 0        | 0     |  |  |
| 49 | 2 US | 2020-12 | 3 US-Midwes  | 3 | 3 | 0        | 0     |  |  |
| 50 | 2 US | 2020-12 | 3 US-Midwes  | 3 | 4 | 0        | 0     |  |  |
| 51 | 2 US | 2020-12 | 3 US-Midwes  | 3 | 5 | 0        | 0     |  |  |
| 52 | 2 US | 2020-12 | 3 US-Northe  | 1 | 1 | 0        | 0     |  |  |
| 53 | 2 US | 2020-12 | 3 US-Northe  | 1 | 2 | 0        | 0     |  |  |
| 54 | 2 US | 2020-12 | 3 US-Northe  | 1 | 3 | 0        | 0     |  |  |
| 55 | 2 US | 2020-12 | 3 US-Northe  | 1 | 4 | 0        | 0     |  |  |
| 56 | 2 US | 2020-12 | 3 US-Northe  | 1 | 5 | 0        | 0     |  |  |
| 57 | 2 US | 2020-12 | 3 US-Northe  | 2 | 1 | 0        | 0     |  |  |
| 58 | 2 US | 2020-12 | 3 US-Northe  | 2 | 2 | 0        | 0     |  |  |
| 59 | 2 US | 2020-12 | 3 US-Northe  | 2 | 3 | 0        | 0     |  |  |
| 60 | 2 US | 2020-12 | 3 US-Northe  | 2 | 3 | 0        | 0     |  |  |

|    |      |         |              |   |   |          |       |  |
|----|------|---------|--------------|---|---|----------|-------|--|
| 1  |      |         |              |   |   |          |       |  |
| 2  |      |         |              |   |   |          |       |  |
| 3  | 2 US | 2020-12 | 3 US-Northe  | 2 | 4 | 0        | 0     |  |
| 4  | 2 US | 2020-12 | 3 US-Northe  | 2 | 5 | 0        | 0     |  |
| 5  | 2 US | 2020-12 | 3 US-Northe  | 3 | 1 | 0        | 0     |  |
| 6  | 2 US | 2020-12 | 3 US-Northe  | 3 | 2 | 0        | 0     |  |
| 7  | 2 US | 2020-12 | 3 US-Northe  | 3 | 3 | 0        | 0     |  |
| 8  | 2 US | 2020-12 | 3 US-Northe  | 3 | 4 | 0        | 0     |  |
| 9  | 2 US | 2020-12 | 3 US-Northe  | 3 | 5 | 0        | 0     |  |
| 10 | 2 US | 2020-12 | 3 US-Overall | 1 | 1 | 0        | 0     |  |
| 11 | 2 US | 2020-12 | 3 US-Overall | 1 | 2 | 0        | 0     |  |
| 12 | 2 US | 2020-12 | 3 US-Overall | 1 | 3 | 0        | 0     |  |
| 13 | 2 US | 2020-12 | 3 US-Overall | 1 | 4 | 0        | 0     |  |
| 14 | 2 US | 2020-12 | 3 US-Overall | 1 | 5 | 0        | 0     |  |
| 15 | 2 US | 2020-12 | 3 US-Overall | 2 | 1 | 0        | 0     |  |
| 16 | 2 US | 2020-12 | 3 US-Overall | 2 | 2 | 0        | 0     |  |
| 17 | 2 US | 2020-12 | 3 US-Overall | 2 | 3 | 0        | 0     |  |
| 18 | 2 US | 2020-12 | 3 US-Overall | 2 | 4 | 0        | 0     |  |
| 19 | 2 US | 2020-12 | 3 US-Overall | 2 | 5 | 0        | 0     |  |
| 20 | 2 US | 2020-12 | 3 US-Overall | 3 | 1 | 0        | 0     |  |
| 21 | 2 US | 2020-12 | 3 US-Overall | 3 | 2 | 0        | 0     |  |
| 22 | 2 US | 2020-12 | 3 US-Overall | 3 | 3 | 0        | 0     |  |
| 23 | 2 US | 2020-12 | 3 US-Overall | 3 | 4 | 0        | 0     |  |
| 24 | 2 US | 2020-12 | 3 US-Overall | 3 | 5 | 0        | 0     |  |
| 25 | 2 US | 2020-12 | 3 US-South   | 1 | 1 | 0        | 0     |  |
| 26 | 2 US | 2020-12 | 3 US-South   | 1 | 2 | 0        | 0     |  |
| 27 | 2 US | 2020-12 | 3 US-South   | 1 | 3 | 0        | 0     |  |
| 28 | 2 US | 2020-12 | 3 US-South   | 1 | 4 | 0        | 0     |  |
| 29 | 2 US | 2020-12 | 3 US-South   | 1 | 5 | 0        | 0     |  |
| 30 | 2 US | 2020-12 | 3 US-South   | 2 | 1 | 0        | 0     |  |
| 31 | 2 US | 2020-12 | 3 US-South   | 2 | 2 | 0        | 0     |  |
| 32 | 2 US | 2020-12 | 3 US-South   | 2 | 3 | 0        | 0     |  |
| 33 | 2 US | 2020-12 | 3 US-South   | 2 | 4 | 0        | 0     |  |
| 34 | 2 US | 2020-12 | 3 US-South   | 2 | 5 | 0        | 0     |  |
| 35 | 2 US | 2020-12 | 3 US-South   | 3 | 1 | 0        | 0     |  |
| 36 | 2 US | 2020-12 | 3 US-South   | 3 | 2 | 0        | 0     |  |
| 37 | 2 US | 2020-12 | 3 US-South   | 3 | 3 | 0        | 0     |  |
| 38 | 2 US | 2020-12 | 3 US-South   | 3 | 4 | 0        | 0     |  |
| 39 | 2 US | 2020-12 | 3 US-South   | 3 | 5 | 0        | 0     |  |
| 40 | 2 US | 2020-12 | 3 US-South   | 3 | 1 | 0        | 0     |  |
| 41 | 2 US | 2020-12 | 3 US-South   | 3 | 2 | 0        | 0     |  |
| 42 | 2 US | 2020-12 | 3 US-South   | 3 | 3 | 0        | 0     |  |
| 43 | 2 US | 2020-12 | 3 US-South   | 3 | 4 | 0        | 0     |  |
| 44 | 2 US | 2020-12 | 3 US-South   | 3 | 5 | 0        | 0     |  |
| 45 | 2 US | 2020-12 | 3 US-South   | 3 | 1 | 0        | 0     |  |
| 46 | 2 US | 2020-12 | 3 US-South   | 3 | 2 | 0        | 0     |  |
| 47 | 2 US | 2020-12 | 3 US-South   | 3 | 3 | 0        | 0     |  |
| 48 | 2 US | 2020-12 | 3 US-South   | 3 | 4 | 0        | 0     |  |
| 49 | 2 US | 2020-12 | 3 US-South   | 3 | 5 | 0        | 0     |  |
| 50 | 2 US | 2020-12 | 3 US-South   | 3 | 1 | 0        | 0     |  |
| 51 | 2 US | 2020-12 | 3 US-South   | 3 | 2 | 0        | 0     |  |
| 52 | 2 US | 2020-12 | 3 US-South   | 3 | 3 | 0        | 0     |  |
| 53 | 2 US | 2020-12 | 3 US-South   | 3 | 4 | 0        | 0     |  |
| 54 | 2 US | 2020-12 | 3 US-South   | 3 | 5 | 0        | 0     |  |
| 55 | 2 US | 2020-12 | 3 US-South   | 3 | 1 | 0        | 0     |  |
| 56 | 2 US | 2020-12 | 3 US-South   | 3 | 2 | 0        | 0     |  |
| 57 | 2 US | 2020-12 | 3 US-South   | 3 | 3 | 0        | 0     |  |
| 58 | 2 US | 2020-12 | 3 US-South   | 3 | 4 | 0        | 0     |  |
| 59 | 2 US | 2020-12 | 3 US-South   | 3 | 5 | 0        | 0     |  |
| 60 | 2 US | 2020-12 | 4 US-Midwes  | 1 | 1 | 2.225994 | ##### |  |
|    | 2 US | 2020-12 | 4 US-Midwes  | 1 | 2 | 2.97971  | ##### |  |
|    | 2 US | 2020-12 | 4 US-Midwes  | 1 | 3 | 2.72454  | ##### |  |
|    | 2 US | 2020-12 | 4 US-Midwes  | 1 | 4 | 1.469038 | ##### |  |

|    |      |         |              |   |   |          |          |
|----|------|---------|--------------|---|---|----------|----------|
| 1  |      |         |              |   |   |          |          |
| 2  |      |         |              |   |   |          |          |
| 3  | 2 US | 2020-12 | 4 US-Midwes  | 1 | 5 | #####    | #####    |
| 4  | 2 US | 2020-12 | 4 US-Midwes  | 2 | 1 | 1.941998 | #####    |
| 5  | 2 US | 2020-12 | 4 US-Midwes  | 2 | 2 | 2.02439  | #####    |
| 6  | 2 US | 2020-12 | 4 US-Midwes  | 2 | 3 | 2.74     | #####    |
| 7  | 2 US | 2020-12 | 4 US-Midwes  | 2 | 4 | 1.617978 | #####    |
| 8  | 2 US | 2020-12 | 4 US-Midwes  | 2 | 5 | #####    | #####    |
| 9  | 2 US | 2020-12 | 4 US-Midwes  | 3 | 1 | 2.494194 | #####    |
| 10 | 2 US | 2020-12 | 4 US-Midwes  | 3 | 2 | 3.451613 | 1.125698 |
| 11 | 2 US | 2020-12 | 4 US-Midwes  | 3 | 3 | 2.705882 | #####    |
| 12 | 2 US | 2020-12 | 4 US-Midwes  | 3 | 4 | 1.25641  | #####    |
| 13 | 2 US | 2020-12 | 4 US-Midwes  | 3 | 5 | #####    | #####    |
| 14 | 2 US | 2020-12 | 4 US-Northea | 1 | 1 | 1.599085 | #####    |
| 15 | 2 US | 2020-12 | 4 US-Northea | 1 | 2 | 2.31012  | #####    |
| 16 | 2 US | 2020-12 | 4 US-Northea | 1 | 3 | 1.787996 | #####    |
| 17 | 2 US | 2020-12 | 4 US-Northea | 1 | 4 | 1.294938 | #####    |
| 18 | 2 US | 2020-12 | 4 US-Northea | 1 | 5 | #####    | #####    |
| 19 | 2 US | 2020-12 | 4 US-Northea | 2 | 1 | 1.525915 | #####    |
| 20 | 2 US | 2020-12 | 4 US-Northea | 2 | 2 | 1.222222 | #####    |
| 21 | 2 US | 2020-12 | 4 US-Northea | 2 | 3 | 2.15625  | #####    |
| 22 | 2 US | 2020-12 | 4 US-Northea | 2 | 4 | 1.406593 | #####    |
| 23 | 2 US | 2020-12 | 4 US-Northea | 2 | 5 | #####    | #####    |
| 24 | 2 US | 2020-12 | 4 US-Northea | 3 | 1 | 1.676291 | #####    |
| 25 | 2 US | 2020-12 | 4 US-Northea | 3 | 2 | 3.190476 | 1.615774 |
| 26 | 2 US | 2020-12 | 4 US-Northea | 3 | 3 | 1.363636 | #####    |
| 27 | 2 US | 2020-12 | 4 US-Northea | 3 | 4 | 1.139535 | #####    |
| 28 | 2 US | 2020-12 | 4 US-Northea | 3 | 5 | #####    | #####    |
| 29 | 2 US | 2020-12 | 4 US-Overall | 1 | 1 | 2.105337 | #####    |
| 30 | 2 US | 2020-12 | 4 US-Overall | 1 | 2 | 2.567548 | #####    |
| 31 | 2 US | 2020-12 | 4 US-Overall | 1 | 3 | 2.534198 | #####    |
| 32 | 2 US | 2020-12 | 4 US-Overall | 1 | 4 | 1.852027 | #####    |
| 33 | 2 US | 2020-12 | 4 US-Overall | 1 | 5 | #####    | #####    |
| 34 | 2 US | 2020-12 | 4 US-Overall | 2 | 1 | 1.878537 | #####    |
| 35 | 2 US | 2020-12 | 4 US-Overall | 2 | 2 | 2.461983 | #####    |
| 36 | 2 US | 2020-12 | 4 US-Overall | 2 | 3 | 1.961333 | #####    |
| 37 | 2 US | 2020-12 | 4 US-Overall | 2 | 4 | 1.990901 | #####    |
| 38 | 2 US | 2020-12 | 4 US-Overall | 2 | 5 | #####    | #####    |
| 39 | 2 US | 2020-12 | 4 US-Overall | 3 | 1 | 2.31155  | #####    |
| 40 | 2 US | 2020-12 | 4 US-Overall | 3 | 2 | 2.648191 | #####    |
| 41 | 2 US | 2020-12 | 4 US-Overall | 3 | 3 | 2.989852 | #####    |
| 42 | 2 US | 2020-12 | 4 US-Overall | 3 | 4 | 1.683852 | #####    |
| 43 | 2 US | 2020-12 | 4 US-Overall | 3 | 5 | #####    | #####    |
| 44 | 2 US | 2020-12 | 4 US-South   | 1 | 1 | 1.945108 | #####    |
| 45 | 2 US | 2020-12 | 4 US-South   | 1 | 2 | 1.930351 | #####    |
| 46 | 2 US | 2020-12 | 4 US-South   | 1 | 3 | 2.432346 | #####    |
| 47 | 2 US | 2020-12 | 4 US-South   | 1 | 4 | 2.042038 | #####    |
| 48 | 2 US | 2020-12 | 4 US-South   | 1 | 5 | #####    | #####    |
| 49 | 2 US | 2020-12 | 4 US-South   | 2 | 1 | 1.902956 | #####    |
| 50 | 2 US | 2020-12 | 4 US-South   | 2 | 2 | 2.5      | #####    |
| 51 | 2 US | 2020-12 | 4 US-South   | 2 | 3 | 1.3625   | #####    |
| 52 | 2 US | 2020-12 | 4 US-South   | 2 | 4 | 2.652174 | #####    |
| 53 | 2 US | 2020-12 | 4 US-South   | 2 | 5 | #####    | #####    |
| 54 | 2 US | 2020-12 | 4 US-South   | 3 | 1 | 1.982022 | #####    |
| 55 | 2 US | 2020-12 | 4 US-South   | 3 | 2 | 1.363636 | #####    |
| 56 | 2 US | 2020-12 | 4 US-South   | 3 | 3 | 3.093023 | #####    |
| 57 | 2 US | 2020-12 | 4 US-South   | 3 | 4 | 1.396552 | #####    |
| 58 | 2 US | 2020-12 | 4 US-South   | 3 | 5 | 0.08     | #####    |
| 59 | 2 US | 2020-12 | 4 US-South   | 3 |   |          |          |
| 60 | 2 US | 2020-12 | 4 US-South   | 3 |   |          |          |

|    |      |         |              |   |   |          |          |  |
|----|------|---------|--------------|---|---|----------|----------|--|
| 1  |      |         |              |   |   |          |          |  |
| 2  |      |         |              |   |   |          |          |  |
| 3  | 2 US | 2020-12 | 4 US-West    | 1 | 1 | 2.771237 | #####    |  |
| 4  | 2 US | 2020-12 | 4 US-West    | 1 | 2 | 3.717216 | #####    |  |
| 5  | 2 US | 2020-12 | 4 US-West    | 1 | 3 | 3.20633  | #####    |  |
| 6  | 2 US | 2020-12 | 4 US-West    | 1 | 4 | 2.328891 | #####    |  |
| 7  | 2 US | 2020-12 | 4 US-West    | 1 | 5 | #####    | #####    |  |
| 8  | 2 US | 2020-12 | 4 US-West    | 2 | 1 | 2.115952 | #####    |  |
| 9  | 2 US | 2020-12 | 4 US-West    | 2 | 2 | 3.897436 | #####    |  |
| 10 | 2 US | 2020-12 | 4 US-West    | 2 | 3 | 2.135135 | #####    |  |
| 11 | 2 US | 2020-12 | 4 US-West    | 2 | 4 | 1.632911 | #####    |  |
| 12 | 2 US | 2020-12 | 4 US-West    | 2 | 5 | 0.25     | #####    |  |
| 13 | 2 US | 2020-12 | 4 US-West    | 3 | 1 | 3.318555 | #####    |  |
| 14 | 2 US | 2020-12 | 4 US-West    | 3 | 2 | 3.607143 | 1.139929 |  |
| 15 | 2 US | 2020-12 | 4 US-West    | 3 | 3 | 3.97619  | #####    |  |
| 16 | 2 US | 2020-12 | 4 US-West    | 3 | 4 | 3.181818 | #####    |  |
| 17 | 2 US | 2020-12 | 4 US-West    | 3 | 5 | #####    | #####    |  |
| 18 | 2 US | 2020-12 | 5 US-Midwes  | 1 | 1 | 1.108239 | #####    |  |
| 19 | 2 US | 2020-12 | 5 US-Midwes  | 1 | 2 | 1.101263 | #####    |  |
| 20 | 2 US | 2020-12 | 5 US-Midwes  | 1 | 3 | 1.20564  | #####    |  |
| 21 | 2 US | 2020-12 | 5 US-Midwes  | 1 | 4 | #####    | #####    |  |
| 22 | 2 US | 2020-12 | 5 US-Midwes  | 1 | 5 | 1.204216 | #####    |  |
| 23 | 2 US | 2020-12 | 5 US-Midwes  | 2 | 1 | #####    | #####    |  |
| 24 | 2 US | 2020-12 | 5 US-Midwes  | 2 | 2 | 0.8      | #####    |  |
| 25 | 2 US | 2020-12 | 5 US-Midwes  | 2 | 3 | #####    | #####    |  |
| 26 | 2 US | 2020-12 | 5 US-Midwes  | 2 | 4 | 0.9375   | #####    |  |
| 27 | 2 US | 2020-12 | 5 US-Midwes  | 2 | 5 | 1.071429 | #####    |  |
| 28 | 2 US | 2020-12 | 5 US-Midwes  | 3 | 1 | 1.332831 | #####    |  |
| 29 | 2 US | 2020-12 | 5 US-Midwes  | 3 | 2 | 1.275862 | #####    |  |
| 30 | 2 US | 2020-12 | 5 US-Midwes  | 3 | 3 | 1.648649 | #####    |  |
| 31 | 2 US | 2020-12 | 5 US-Midwes  | 3 | 4 | #####    | #####    |  |
| 32 | 2 US | 2020-12 | 5 US-Midwes  | 3 | 5 | 1.388889 | #####    |  |
| 33 | 2 US | 2020-12 | 5 US-Northea | 1 | 1 | 1.181531 | #####    |  |
| 34 | 2 US | 2020-12 | 5 US-Northea | 1 | 2 | 1.281303 | #####    |  |
| 35 | 2 US | 2020-12 | 5 US-Northea | 1 | 3 | 1.206212 | #####    |  |
| 36 | 2 US | 2020-12 | 5 US-Northea | 1 | 4 | 1.149193 | #####    |  |
| 37 | 2 US | 2020-12 | 5 US-Northea | 1 | 5 | #####    | #####    |  |
| 38 | 2 US | 2020-12 | 5 US-Northea | 2 | 1 | 1.059461 | #####    |  |
| 39 | 2 US | 2020-12 | 5 US-Northea | 2 | 2 | 1.266667 | #####    |  |
| 40 | 2 US | 2020-12 | 5 US-Northea | 2 | 3 | 1.094737 | #####    |  |
| 41 | 2 US | 2020-12 | 5 US-Northea | 2 | 4 | #####    | #####    |  |
| 42 | 2 US | 2020-12 | 5 US-Northea | 2 | 5 | 1        | #####    |  |
| 43 | 2 US | 2020-12 | 5 US-Northea | 3 | 1 | 1.299932 | #####    |  |
| 44 | 2 US | 2020-12 | 5 US-Northea | 3 | 2 | 1.291667 | #####    |  |
| 45 | 2 US | 2020-12 | 5 US-Northea | 3 | 3 | 1.333333 | #####    |  |
| 46 | 2 US | 2020-12 | 5 US-Northea | 3 | 4 | 1.510638 | #####    |  |
| 47 | 2 US | 2020-12 | 5 US-Northea | 3 | 5 | #####    | #####    |  |
| 48 | 2 US | 2020-12 | 5 US-Overall | 1 | 1 | 1.08526  | #####    |  |
| 49 | 2 US | 2020-12 | 5 US-Overall | 1 | 2 | #####    | #####    |  |
| 50 | 2 US | 2020-12 | 5 US-Overall | 1 | 3 | 1.107599 | #####    |  |
| 51 | 2 US | 2020-12 | 5 US-Overall | 1 | 4 | 1.278211 | #####    |  |
| 52 | 2 US | 2020-12 | 5 US-Overall | 1 | 5 | 1.05487  | #####    |  |
| 53 | 2 US | 2020-12 | 5 US-Overall | 2 | 1 | #####    | #####    |  |
| 54 | 2 US | 2020-12 | 5 US-Overall | 2 | 2 | #####    | #####    |  |
| 55 | 2 US | 2020-12 | 5 US-Overall | 2 | 3 | #####    | #####    |  |
| 56 | 2 US | 2020-12 | 5 US-Overall | 2 | 4 | 1.124651 | #####    |  |
| 57 | 2 US | 2020-12 | 5 US-Overall | 2 | 5 | 1.014129 | #####    |  |
| 58 | 2 US | 2020-12 | 5 US-Overall | 3 | 1 | 1.169591 | #####    |  |
| 59 | 2 US | 2020-12 | 5 US-Overall | 3 |   |          |          |  |
| 60 | 2 US | 2020-12 | 5 US-Overall | 3 |   |          |          |  |



|    |      |         |              |   |   |          |       |
|----|------|---------|--------------|---|---|----------|-------|
| 1  |      |         |              |   |   |          |       |
| 2  |      |         |              |   |   |          |       |
| 3  | 2 US | 2020-12 | 5 US-Overall | 3 | 2 | #####    | ##### |
| 4  | 2 US | 2020-12 | 5 US-Overall | 3 | 3 | 1.226973 | ##### |
| 5  | 2 US | 2020-12 | 5 US-Overall | 3 | 4 | 1.453945 | ##### |
| 6  | 2 US | 2020-12 | 5 US-Overall | 3 | 5 | 1.109407 | ##### |
| 7  | 2 US | 2020-12 | 5 US-South   | 1 | 1 | #####    | ##### |
| 8  | 2 US | 2020-12 | 5 US-South   | 1 | 2 | #####    | ##### |
| 9  | 2 US | 2020-12 | 5 US-South   | 1 | 3 | #####    | ##### |
| 10 | 2 US | 2020-12 | 5 US-South   | 1 | 4 | 1.48742  | ##### |
| 11 | 2 US | 2020-12 | 5 US-South   | 1 | 5 | 1.168722 | ##### |
| 12 | 2 US | 2020-12 | 5 US-South   | 2 | 1 | #####    | ##### |
| 13 | 2 US | 2020-12 | 5 US-South   | 2 | 2 | #####    | ##### |
| 14 | 2 US | 2020-12 | 5 US-South   | 2 | 3 | #####    | ##### |
| 15 | 2 US | 2020-12 | 5 US-South   | 2 | 4 | 1.285714 | ##### |
| 16 | 2 US | 2020-12 | 5 US-South   | 2 | 5 | 1.132353 | ##### |
| 17 | 2 US | 2020-12 | 5 US-South   | 3 | 1 | 1.060964 | ##### |
| 18 | 2 US | 2020-12 | 5 US-South   | 3 | 2 | #####    | ##### |
| 19 | 2 US | 2020-12 | 5 US-South   | 3 | 3 | #####    | ##### |
| 20 | 2 US | 2020-12 | 5 US-South   | 3 | 4 | 1.694915 | ##### |
| 21 | 2 US | 2020-12 | 5 US-South   | 3 | 5 | 1.225    | ##### |
| 22 | 2 US | 2020-12 | 5 US-West    | 1 | 1 | 1.166031 | ##### |
| 23 | 2 US | 2020-12 | 5 US-West    | 1 | 2 | #####    | ##### |
| 24 | 2 US | 2020-12 | 5 US-West    | 1 | 3 | 1.47806  | ##### |
| 25 | 2 US | 2020-12 | 5 US-West    | 1 | 4 | 1.262525 | ##### |
| 26 | 2 US | 2020-12 | 5 US-West    | 1 | 5 | #####    | ##### |
| 27 | 2 US | 2020-12 | 5 US-West    | 2 | 1 | 1.179374 | ##### |
| 28 | 2 US | 2020-12 | 5 US-West    | 2 | 2 | #####    | ##### |
| 29 | 2 US | 2020-12 | 5 US-West    | 2 | 3 | 1.5      | ##### |
| 30 | 2 US | 2020-12 | 5 US-West    | 2 | 4 | 1.243243 | ##### |
| 31 | 2 US | 2020-12 | 5 US-West    | 2 | 5 | #####    | ##### |
| 32 | 2 US | 2020-12 | 5 US-West    | 3 | 1 | 1.155064 | ##### |
| 33 | 2 US | 2020-12 | 5 US-West    | 3 | 2 | 0.875    | ##### |
| 34 | 2 US | 2020-12 | 5 US-West    | 3 | 3 | 1.461538 | ##### |
| 35 | 2 US | 2020-12 | 5 US-West    | 3 | 4 | 1.285714 | ##### |
| 36 | 2 US | 2020-12 | 5 US-West    | 3 | 5 | 0.875    | ##### |
| 37 | 2 US | 2020-12 | 5 US-West    | 3 | 5 | 0.875    | ##### |
| 38 | 2 US | 2020-13 | 1 US-Midwes  | 1 | 1 | 3.816351 | ##### |
| 39 | 2 US | 2020-13 | 1 US-Midwes  | 1 | 2 | 4.446858 | ##### |
| 40 | 2 US | 2020-13 | 1 US-Midwes  | 1 | 3 | 4.769713 | ##### |
| 41 | 2 US | 2020-13 | 1 US-Midwes  | 1 | 4 | 3.413348 | ##### |
| 42 | 2 US | 2020-13 | 1 US-Midwes  | 1 | 5 | 2.059151 | ##### |
| 43 | 2 US | 2020-13 | 1 US-Midwes  | 2 | 1 | 3.462527 | ##### |
| 44 | 2 US | 2020-13 | 1 US-Midwes  | 2 | 2 | 4.706667 | ##### |
| 45 | 2 US | 2020-13 | 1 US-Midwes  | 2 | 3 | 4.070922 | ##### |
| 46 | 2 US | 2020-13 | 1 US-Midwes  | 2 | 4 | 3.305389 | ##### |
| 47 | 2 US | 2020-13 | 1 US-Midwes  | 2 | 5 | 1.794872 | ##### |
| 48 | 2 US | 2020-13 | 1 US-Midwes  | 3 | 1 | 4.240217 | ##### |
| 49 | 2 US | 2020-13 | 1 US-Midwes  | 3 | 2 | 4.130435 | ##### |
| 50 | 2 US | 2020-13 | 1 US-Midwes  | 3 | 3 | 5.373134 | ##### |
| 51 | 2 US | 2020-13 | 1 US-Midwes  | 3 | 4 | 3.547619 | ##### |
| 52 | 2 US | 2020-13 | 1 US-Midwes  | 3 | 5 | 2.585714 | ##### |
| 53 | 2 US | 2020-13 | 1 US-Northe  | 1 | 1 | 3.656426 | ##### |
| 54 | 2 US | 2020-13 | 1 US-Northe  | 1 | 2 | 3.151021 | ##### |
| 55 | 2 US | 2020-13 | 1 US-Northe  | 1 | 3 | 4.257189 | ##### |
| 56 | 2 US | 2020-13 | 1 US-Northe  | 1 | 4 | 4.230359 | ##### |
| 57 | 2 US | 2020-13 | 1 US-Northe  | 1 | 5 | 2.241034 | ##### |
| 58 | 2 US | 2020-13 | 1 US-Northe  | 2 | 1 | 3.192126 | ##### |
| 59 | 2 US | 2020-13 | 1 US-Northe  | 2 | 2 | 3.1875   | ##### |
| 60 | 2 US | 2020-13 | 1 US-Northe  | 2 | 2 | 3.1875   | ##### |

|    |      |         |              |   |   |          |          |  |
|----|------|---------|--------------|---|---|----------|----------|--|
| 1  |      |         |              |   |   |          |          |  |
| 2  |      |         |              |   |   |          |          |  |
| 3  | 2 US | 2020-13 | 1 US-Northe  | 2 | 3 | 3.294118 | #####    |  |
| 4  | 2 US | 2020-13 | 1 US-Northe  | 2 | 4 | 3.978102 | #####    |  |
| 5  | 2 US | 2020-13 | 1 US-Northe  | 2 | 5 | 2.008772 | #####    |  |
| 6  | 2 US | 2020-13 | 1 US-Northe  | 3 | 1 | 4.178594 | #####    |  |
| 7  | 2 US | 2020-13 | 1 US-Northe  | 3 | 2 | 3.090909 | #####    |  |
| 8  | 2 US | 2020-13 | 1 US-Northe  | 3 | 3 | 5.183673 | #####    |  |
| 9  | 2 US | 2020-13 | 1 US-Northe  | 3 | 4 | 4.488636 | #####    |  |
| 10 | 2 US | 2020-13 | 1 US-Northe  | 3 | 5 | 2.532609 | #####    |  |
| 11 | 2 US | 2020-13 | 1 US-Overall | 1 | 1 | 3.914617 | #####    |  |
| 12 | 2 US | 2020-13 | 1 US-Overall | 1 | 2 | 4.404421 | #####    |  |
| 13 | 2 US | 2020-13 | 1 US-Overall | 1 | 3 | 4.757459 | #####    |  |
| 14 | 2 US | 2020-13 | 1 US-Overall | 1 | 4 | 3.614396 | #####    |  |
| 15 | 2 US | 2020-13 | 1 US-Overall | 1 | 5 | 2.185908 | #####    |  |
| 16 | 2 US | 2020-13 | 1 US-Overall | 2 | 1 | 3.503937 | #####    |  |
| 17 | 2 US | 2020-13 | 1 US-Overall | 2 | 2 | 4.201412 | #####    |  |
| 18 | 2 US | 2020-13 | 1 US-Overall | 2 | 3 | 4.069267 | #####    |  |
| 19 | 2 US | 2020-13 | 1 US-Overall | 2 | 4 | 3.519793 | #####    |  |
| 20 | 2 US | 2020-13 | 1 US-Overall | 2 | 5 | 2.045304 | #####    |  |
| 21 | 2 US | 2020-13 | 1 US-Overall | 3 | 1 | 4.348998 | #####    |  |
| 22 | 2 US | 2020-13 | 1 US-Overall | 3 | 2 | 4.618236 | #####    |  |
| 23 | 2 US | 2020-13 | 1 US-Overall | 3 | 3 | 5.295662 | #####    |  |
| 24 | 2 US | 2020-13 | 1 US-Overall | 3 | 4 | 3.733962 | #####    |  |
| 25 | 2 US | 2020-13 | 1 US-Overall | 3 | 5 | 2.395423 | #####    |  |
| 26 | 2 US | 2020-13 | 1 US-South   | 1 | 1 | 4.203193 | #####    |  |
| 27 | 2 US | 2020-13 | 1 US-South   | 1 | 2 | 5.085138 | #####    |  |
| 28 | 2 US | 2020-13 | 1 US-South   | 1 | 3 | 5.124205 | #####    |  |
| 29 | 2 US | 2020-13 | 1 US-South   | 1 | 4 | 3.399582 | #####    |  |
| 30 | 2 US | 2020-13 | 1 US-South   | 1 | 5 | 2.233947 | #####    |  |
| 31 | 2 US | 2020-13 | 1 US-South   | 2 | 1 | 3.507473 | #####    |  |
| 32 | 2 US | 2020-13 | 1 US-South   | 2 | 2 | 4.25     | #####    |  |
| 33 | 2 US | 2020-13 | 1 US-South   | 2 | 3 | 4.053191 | #####    |  |
| 34 | 2 US | 2020-13 | 1 US-South   | 2 | 4 | 3.366906 | #####    |  |
| 35 | 2 US | 2020-13 | 1 US-South   | 2 | 5 | 2.24812  | #####    |  |
| 36 | 2 US | 2020-13 | 1 US-South   | 3 | 1 | 4.836709 | #####    |  |
| 37 | 2 US | 2020-13 | 1 US-South   | 3 | 2 | 5.772727 | 1.467237 |  |
| 38 | 2 US | 2020-13 | 1 US-South   | 3 | 3 | 5.754717 | #####    |  |
| 39 | 2 US | 2020-13 | 1 US-South   | 3 | 4 | 3.442857 | #####    |  |
| 40 | 2 US | 2020-13 | 1 US-South   | 3 | 5 | 2.2125   | #####    |  |
| 41 | 2 US | 2020-13 | 1 US-West    | 1 | 1 | 3.722325 | #####    |  |
| 42 | 2 US | 2020-13 | 1 US-West    | 1 | 2 | 3.582947 | #####    |  |
| 43 | 2 US | 2020-13 | 1 US-West    | 1 | 3 | 4.518463 | #####    |  |
| 44 | 2 US | 2020-13 | 1 US-West    | 1 | 4 | 3.567408 | #####    |  |
| 45 | 2 US | 2020-13 | 1 US-West    | 1 | 5 | 2.185123 | #####    |  |
| 46 | 2 US | 2020-13 | 1 US-West    | 2 | 1 | 3.790165 | #####    |  |
| 47 | 2 US | 2020-13 | 1 US-West    | 2 | 2 | 4.416667 | #####    |  |
| 48 | 2 US | 2020-13 | 1 US-West    | 2 | 3 | 4.597222 | #####    |  |
| 49 | 2 US | 2020-13 | 1 US-West    | 2 | 4 | 3.569697 | #####    |  |
| 50 | 2 US | 2020-13 | 1 US-West    | 2 | 5 | 2.030769 | #####    |  |
| 51 | 2 US | 2020-13 | 1 US-West    | 3 | 1 | 3.64378  | #####    |  |
| 52 | 2 US | 2020-13 | 1 US-West    | 3 | 2 | 2.642857 | #####    |  |
| 53 | 2 US | 2020-13 | 1 US-West    | 3 | 3 | 4.442623 | #####    |  |
| 54 | 2 US | 2020-13 | 1 US-West    | 3 | 4 | 3.564103 | #####    |  |
| 55 | 2 US | 2020-13 | 1 US-West    | 3 | 5 | 2.382979 | #####    |  |
| 56 | 2 US | 2020-13 | 2 US-Midwes  | 1 | 1 | 1.67201  | #####    |  |
| 57 | 2 US | 2020-13 | 2 US-Midwes  | 1 | 2 | 1.93838  | #####    |  |
| 58 | 2 US | 2020-13 | 2 US-Midwes  | 1 | 3 | 1.959184 | #####    |  |
| 59 | 2 US | 2020-13 | 2 US-Midwes  | 1 |   |          |          |  |
| 60 | 2 US | 2020-13 | 2 US-Midwes  | 1 |   |          |          |  |

|    |      |         |              |   |   |          |       |  |
|----|------|---------|--------------|---|---|----------|-------|--|
| 1  |      |         |              |   |   |          |       |  |
| 2  |      |         |              |   |   |          |       |  |
| 3  | 2 US | 2020-13 | 2 US-Midwes  | 1 | 4 | 1.489104 | ##### |  |
| 4  | 2 US | 2020-13 | 2 US-Midwes  | 1 | 5 | 1.116341 | ##### |  |
| 5  | 2 US | 2020-13 | 2 US-Midwes  | 2 | 1 | 1.622445 | ##### |  |
| 6  | 2 US | 2020-13 | 2 US-Midwes  | 2 | 2 | 1.848101 | ##### |  |
| 7  | 2 US | 2020-13 | 2 US-Midwes  | 2 | 3 | 2.12     | ##### |  |
| 8  | 2 US | 2020-13 | 2 US-Midwes  | 2 | 4 | 1.488889 | ##### |  |
| 9  | 2 US | 2020-13 | 2 US-Midwes  | 2 | 5 | #####    | ##### |  |
| 10 | 2 US | 2020-13 | 2 US-Midwes  | 3 | 1 | 1.726868 | ##### |  |
| 11 | 2 US | 2020-13 | 2 US-Midwes  | 3 | 2 | 2.037037 | ##### |  |
| 12 | 2 US | 2020-13 | 2 US-Midwes  | 3 | 3 | 1.828947 | ##### |  |
| 13 | 2 US | 2020-13 | 2 US-Midwes  | 3 | 4 | 1.489362 | ##### |  |
| 14 | 2 US | 2020-13 | 2 US-Midwes  | 3 | 5 | 1.4      | ##### |  |
| 15 | 2 US | 2020-13 | 2 US-Northea | 1 | 1 | 1.651731 | ##### |  |
| 16 | 2 US | 2020-13 | 2 US-Northea | 1 | 2 | 1.737229 | ##### |  |
| 17 | 2 US | 2020-13 | 2 US-Northea | 1 | 3 | 1.98423  | ##### |  |
| 18 | 2 US | 2020-13 | 2 US-Northea | 1 | 4 | 1.606647 | ##### |  |
| 19 | 2 US | 2020-13 | 2 US-Northea | 1 | 5 | 1.115809 | ##### |  |
| 20 | 2 US | 2020-13 | 2 US-Northea | 2 | 1 | 1.667953 | ##### |  |
| 21 | 2 US | 2020-13 | 2 US-Northea | 2 | 2 | 1.98     | ##### |  |
| 22 | 2 US | 2020-13 | 2 US-Northea | 2 | 3 | 2.049587 | ##### |  |
| 23 | 2 US | 2020-13 | 2 US-Northea | 2 | 4 | 1.601351 | ##### |  |
| 24 | 2 US | 2020-13 | 2 US-Northea | 2 | 5 | #####    | ##### |  |
| 25 | 2 US | 2020-13 | 2 US-Northea | 3 | 1 | 1.634935 | ##### |  |
| 26 | 2 US | 2020-13 | 2 US-Northea | 3 | 2 | 1.384615 | ##### |  |
| 27 | 2 US | 2020-13 | 2 US-Northea | 3 | 3 | 1.927273 | ##### |  |
| 28 | 2 US | 2020-13 | 2 US-Northea | 3 | 4 | 1.61165  | ##### |  |
| 29 | 2 US | 2020-13 | 2 US-Northea | 3 | 5 | 1.28866  | ##### |  |
| 30 | 2 US | 2020-13 | 2 US-Overall | 1 | 1 | 1.675935 | ##### |  |
| 31 | 2 US | 2020-13 | 2 US-Overall | 1 | 2 | 1.89618  | ##### |  |
| 32 | 2 US | 2020-13 | 2 US-Overall | 1 | 3 | 1.933422 | ##### |  |
| 33 | 2 US | 2020-13 | 2 US-Overall | 1 | 4 | 1.518103 | ##### |  |
| 34 | 2 US | 2020-13 | 2 US-Overall | 1 | 5 | 1.126684 | ##### |  |
| 35 | 2 US | 2020-13 | 2 US-Overall | 2 | 1 | 1.700991 | ##### |  |
| 36 | 2 US | 2020-13 | 2 US-Overall | 2 | 2 | 1.970177 | ##### |  |
| 37 | 2 US | 2020-13 | 2 US-Overall | 2 | 3 | 2.110941 | ##### |  |
| 38 | 2 US | 2020-13 | 2 US-Overall | 2 | 4 | 1.510177 | ##### |  |
| 39 | 2 US | 2020-13 | 2 US-Overall | 2 | 5 | 1.096533 | ##### |  |
| 40 | 2 US | 2020-13 | 2 US-Overall | 3 | 1 | 1.651547 | ##### |  |
| 41 | 2 US | 2020-13 | 2 US-Overall | 3 | 2 | 1.827614 | ##### |  |
| 42 | 2 US | 2020-13 | 2 US-Overall | 3 | 3 | 1.804007 | ##### |  |
| 43 | 2 US | 2020-13 | 2 US-Overall | 3 | 4 | 1.527497 | ##### |  |
| 44 | 2 US | 2020-13 | 2 US-Overall | 3 | 5 | 1.168452 | ##### |  |
| 45 | 2 US | 2020-13 | 2 US-South   | 1 | 1 | 1.70667  | ##### |  |
| 46 | 2 US | 2020-13 | 2 US-South   | 1 | 2 | 1.933547 | ##### |  |
| 47 | 2 US | 2020-13 | 2 US-South   | 1 | 3 | 1.938722 | ##### |  |
| 48 | 2 US | 2020-13 | 2 US-South   | 1 | 4 | 1.498122 | ##### |  |
| 49 | 2 US | 2020-13 | 2 US-South   | 1 | 5 | 1.148733 | ##### |  |
| 50 | 2 US | 2020-13 | 2 US-South   | 2 | 1 | 1.722552 | ##### |  |
| 51 | 2 US | 2020-13 | 2 US-South   | 2 | 2 | 1.946429 | ##### |  |
| 52 | 2 US | 2020-13 | 2 US-South   | 2 | 3 | 2.116505 | ##### |  |
| 53 | 2 US | 2020-13 | 2 US-South   | 2 | 4 | 1.506849 | ##### |  |
| 54 | 2 US | 2020-13 | 2 US-South   | 2 | 5 | 1.224638 | ##### |  |
| 55 | 2 US | 2020-13 | 2 US-South   | 3 | 1 | 1.693369 | ##### |  |
| 56 | 2 US | 2020-13 | 2 US-South   | 3 | 2 | 1.923077 | ##### |  |
| 57 | 2 US | 2020-13 | 2 US-South   | 3 | 3 | 1.84375  | ##### |  |
| 58 | 2 US | 2020-13 | 2 US-South   | 3 | 4 | 1.4875   | ##### |  |
| 59 | 2 US | 2020-13 | 2 US-South   | 3 |   |          |       |  |
| 60 | 2 US | 2020-13 | 2 US-South   | 3 |   |          |       |  |

|    |      |         |              |   |   |          |       |   |  |
|----|------|---------|--------------|---|---|----------|-------|---|--|
| 1  |      |         |              |   |   |          |       |   |  |
| 2  |      |         |              |   |   |          |       |   |  |
| 3  | 2 US | 2020-13 | 2 US-South   | 3 | 5 | 1.043956 | ##### |   |  |
| 4  | 2 US | 2020-13 | 2 US-West    | 1 | 1 | 1.645246 | ##### |   |  |
| 5  | 2 US | 2020-13 | 2 US-West    | 1 | 2 | 1.874772 | ##### |   |  |
| 6  | 2 US | 2020-13 | 2 US-West    | 1 | 3 | 1.870413 | ##### |   |  |
| 7  | 2 US | 2020-13 | 2 US-West    | 1 | 4 | 1.493165 | ##### |   |  |
| 8  | 2 US | 2020-13 | 2 US-West    | 1 | 5 | 1.110027 | ##### |   |  |
| 9  | 2 US | 2020-13 | 2 US-West    | 2 | 1 | 1.767145 | ##### |   |  |
| 10 | 2 US | 2020-13 | 2 US-West    | 2 | 2 | 2.186047 | ##### |   |  |
| 11 | 2 US | 2020-13 | 2 US-West    | 2 | 3 | 2.136364 | ##### |   |  |
| 12 | 2 US | 2020-13 | 2 US-West    | 2 | 4 | 1.463687 | ##### |   |  |
| 13 | 2 US | 2020-13 | 2 US-West    | 2 | 5 | 1.159091 | ##### |   |  |
| 14 | 2 US | 2020-13 | 2 US-West    | 3 | 1 | 1.51497  | ##### |   |  |
| 15 | 2 US | 2020-13 | 2 US-West    | 3 | 2 | 1.64     | ##### |   |  |
| 16 | 2 US | 2020-13 | 2 US-West    | 3 | 3 | 1.609375 | ##### |   |  |
| 17 | 2 US | 2020-13 | 2 US-West    | 3 | 4 | 1.534091 | ##### |   |  |
| 18 | 2 US | 2020-13 | 2 US-West    | 3 | 5 | 1.05     | ##### |   |  |
| 19 | 2 US | 2020-13 | 3 US-Midwes  | 1 | 1 | 0        |       | 0 |  |
| 20 | 2 US | 2020-13 | 3 US-Midwes  | 1 | 2 | 0        |       | 0 |  |
| 21 | 2 US | 2020-13 | 3 US-Midwes  | 1 | 3 | 0        |       | 0 |  |
| 22 | 2 US | 2020-13 | 3 US-Midwes  | 1 | 4 | 0        |       | 0 |  |
| 23 | 2 US | 2020-13 | 3 US-Midwes  | 1 | 5 | 0        |       | 0 |  |
| 24 | 2 US | 2020-13 | 3 US-Midwes  | 2 | 1 | 0        |       | 0 |  |
| 25 | 2 US | 2020-13 | 3 US-Midwes  | 2 | 2 | 0        |       | 0 |  |
| 26 | 2 US | 2020-13 | 3 US-Midwes  | 2 | 3 | 0        |       | 0 |  |
| 27 | 2 US | 2020-13 | 3 US-Midwes  | 2 | 4 | 0        |       | 0 |  |
| 28 | 2 US | 2020-13 | 3 US-Midwes  | 2 | 5 | 0        |       | 0 |  |
| 29 | 2 US | 2020-13 | 3 US-Midwes  | 3 | 1 | 0        |       | 0 |  |
| 30 | 2 US | 2020-13 | 3 US-Midwes  | 3 | 2 | 0        |       | 0 |  |
| 31 | 2 US | 2020-13 | 3 US-Midwes  | 3 | 3 | 0        |       | 0 |  |
| 32 | 2 US | 2020-13 | 3 US-Midwes  | 3 | 4 | 0        |       | 0 |  |
| 33 | 2 US | 2020-13 | 3 US-Midwes  | 3 | 5 | 0        |       | 0 |  |
| 34 | 2 US | 2020-13 | 3 US-Northea | 1 | 1 | 0        |       | 0 |  |
| 35 | 2 US | 2020-13 | 3 US-Northea | 1 | 2 | 0        |       | 0 |  |
| 36 | 2 US | 2020-13 | 3 US-Northea | 1 | 3 | 0        |       | 0 |  |
| 37 | 2 US | 2020-13 | 3 US-Northea | 1 | 4 | 0        |       | 0 |  |
| 38 | 2 US | 2020-13 | 3 US-Northea | 1 | 5 | 0        |       | 0 |  |
| 39 | 2 US | 2020-13 | 3 US-Northea | 2 | 1 | 0        |       | 0 |  |
| 40 | 2 US | 2020-13 | 3 US-Northea | 2 | 2 | 0        |       | 0 |  |
| 41 | 2 US | 2020-13 | 3 US-Northea | 2 | 3 | 0        |       | 0 |  |
| 42 | 2 US | 2020-13 | 3 US-Northea | 2 | 4 | 0        |       | 0 |  |
| 43 | 2 US | 2020-13 | 3 US-Northea | 2 | 5 | 0        |       | 0 |  |
| 44 | 2 US | 2020-13 | 3 US-Northea | 3 | 1 | 0        |       | 0 |  |
| 45 | 2 US | 2020-13 | 3 US-Northea | 3 | 2 | 0        |       | 0 |  |
| 46 | 2 US | 2020-13 | 3 US-Northea | 3 | 3 | 0        |       | 0 |  |
| 47 | 2 US | 2020-13 | 3 US-Northea | 3 | 4 | 0        |       | 0 |  |
| 48 | 2 US | 2020-13 | 3 US-Northea | 3 | 5 | 0        |       | 0 |  |
| 49 | 2 US | 2020-13 | 3 US-Overall | 1 | 1 | 0        |       | 0 |  |
| 50 | 2 US | 2020-13 | 3 US-Overall | 1 | 2 | 0        |       | 0 |  |
| 51 | 2 US | 2020-13 | 3 US-Overall | 1 | 3 | 0        |       | 0 |  |
| 52 | 2 US | 2020-13 | 3 US-Overall | 1 | 4 | 0        |       | 0 |  |
| 53 | 2 US | 2020-13 | 3 US-Overall | 1 | 5 | 0        |       | 0 |  |
| 54 | 2 US | 2020-13 | 3 US-Overall | 2 | 1 | 0        |       | 0 |  |
| 55 | 2 US | 2020-13 | 3 US-Overall | 2 | 2 | 0        |       | 0 |  |
| 56 | 2 US | 2020-13 | 3 US-Overall | 2 | 3 | 0        |       | 0 |  |
| 57 | 2 US | 2020-13 | 3 US-Overall | 2 | 4 | 0        |       | 0 |  |
| 58 | 2 US | 2020-13 | 3 US-Overall | 2 | 5 | 0        |       | 0 |  |
| 59 | 2 US | 2020-13 | 3 US-Overall | 2 | 5 | 0        |       | 0 |  |
| 60 | 2 US | 2020-13 | 3 US-Overall | 2 | 5 | 0        |       | 0 |  |

|    |      |         |              |   |   |          |       |  |
|----|------|---------|--------------|---|---|----------|-------|--|
| 1  |      |         |              |   |   |          |       |  |
| 2  |      |         |              |   |   |          |       |  |
| 3  | 2 US | 2020-13 | 3 US-Overall | 3 | 1 | 0        | 0     |  |
| 4  | 2 US | 2020-13 | 3 US-Overall | 3 | 2 | 0        | 0     |  |
| 5  | 2 US | 2020-13 | 3 US-Overall | 3 | 3 | 0        | 0     |  |
| 6  | 2 US | 2020-13 | 3 US-Overall | 3 | 4 | 0        | 0     |  |
| 7  | 2 US | 2020-13 | 3 US-Overall | 3 | 5 | 0        | 0     |  |
| 8  | 2 US | 2020-13 | 3 US-South   | 1 | 1 | 0        | 0     |  |
| 9  | 2 US | 2020-13 | 3 US-South   | 1 | 2 | 0        | 0     |  |
| 10 | 2 US | 2020-13 | 3 US-South   | 1 | 3 | 0        | 0     |  |
| 11 | 2 US | 2020-13 | 3 US-South   | 1 | 4 | 0        | 0     |  |
| 12 | 2 US | 2020-13 | 3 US-South   | 1 | 5 | 0        | 0     |  |
| 13 | 2 US | 2020-13 | 3 US-South   | 2 | 1 | 0        | 0     |  |
| 14 | 2 US | 2020-13 | 3 US-South   | 2 | 2 | 0        | 0     |  |
| 15 | 2 US | 2020-13 | 3 US-South   | 2 | 3 | 0        | 0     |  |
| 16 | 2 US | 2020-13 | 3 US-South   | 2 | 4 | 0        | 0     |  |
| 17 | 2 US | 2020-13 | 3 US-South   | 2 | 5 | 0        | 0     |  |
| 18 | 2 US | 2020-13 | 3 US-South   | 3 | 1 | 0        | 0     |  |
| 19 | 2 US | 2020-13 | 3 US-South   | 3 | 2 | 0        | 0     |  |
| 20 | 2 US | 2020-13 | 3 US-South   | 3 | 3 | 0        | 0     |  |
| 21 | 2 US | 2020-13 | 3 US-South   | 3 | 4 | 0        | 0     |  |
| 22 | 2 US | 2020-13 | 3 US-South   | 3 | 5 | 0        | 0     |  |
| 23 | 2 US | 2020-13 | 3 US-South   | 3 | 5 | 0        | 0     |  |
| 24 | 2 US | 2020-13 | 3 US-West    | 1 | 1 | 0        | 0     |  |
| 25 | 2 US | 2020-13 | 3 US-West    | 1 | 2 | 0        | 0     |  |
| 26 | 2 US | 2020-13 | 3 US-West    | 1 | 3 | 0        | 0     |  |
| 27 | 2 US | 2020-13 | 3 US-West    | 1 | 4 | 0        | 0     |  |
| 28 | 2 US | 2020-13 | 3 US-West    | 1 | 5 | 0        | 0     |  |
| 29 | 2 US | 2020-13 | 3 US-West    | 2 | 1 | 0        | 0     |  |
| 30 | 2 US | 2020-13 | 3 US-West    | 2 | 2 | 0        | 0     |  |
| 31 | 2 US | 2020-13 | 3 US-West    | 2 | 3 | 0        | 0     |  |
| 32 | 2 US | 2020-13 | 3 US-West    | 2 | 4 | 0        | 0     |  |
| 33 | 2 US | 2020-13 | 3 US-West    | 2 | 5 | 0        | 0     |  |
| 34 | 2 US | 2020-13 | 3 US-West    | 3 | 1 | 0        | 0     |  |
| 35 | 2 US | 2020-13 | 3 US-West    | 3 | 2 | 0        | 0     |  |
| 36 | 2 US | 2020-13 | 3 US-West    | 3 | 3 | 0        | 0     |  |
| 37 | 2 US | 2020-13 | 3 US-West    | 3 | 4 | 0        | 0     |  |
| 38 | 2 US | 2020-13 | 3 US-West    | 3 | 5 | 0        | 0     |  |
| 39 | 2 US | 2020-13 | 4 US-Midwes  | 1 | 1 | 1.620205 | ##### |  |
| 40 | 2 US | 2020-13 | 4 US-Midwes  | 1 | 2 | 1.898506 | ##### |  |
| 41 | 2 US | 2020-13 | 4 US-Midwes  | 1 | 3 | 2.589176 | ##### |  |
| 42 | 2 US | 2020-13 | 4 US-Midwes  | 1 | 4 | 1.183529 | ##### |  |
| 43 | 2 US | 2020-13 | 4 US-Midwes  | 1 | 5 | #####    | ##### |  |
| 44 | 2 US | 2020-13 | 4 US-Midwes  | 2 | 1 | 1.115713 | ##### |  |
| 45 | 2 US | 2020-13 | 4 US-Midwes  | 2 | 2 | 1.8      | ##### |  |
| 46 | 2 US | 2020-13 | 4 US-Midwes  | 2 | 3 | 1.53125  | ##### |  |
| 47 | 2 US | 2020-13 | 4 US-Midwes  | 2 | 4 | #####    | ##### |  |
| 48 | 2 US | 2020-13 | 4 US-Midwes  | 2 | 5 | #####    | ##### |  |
| 49 | 2 US | 2020-13 | 4 US-Midwes  | 3 | 1 | 2.170236 | ##### |  |
| 50 | 2 US | 2020-13 | 4 US-Midwes  | 3 | 2 | 2        | ##### |  |
| 51 | 2 US | 2020-13 | 4 US-Midwes  | 3 | 3 | 3.468354 | ##### |  |
| 52 | 2 US | 2020-13 | 4 US-Midwes  | 3 | 4 | 1.431579 | ##### |  |
| 53 | 2 US | 2020-13 | 4 US-Midwes  | 3 | 5 | #####    | ##### |  |
| 54 | 2 US | 2020-13 | 4 US-Northe  | 1 | 1 | 1.382929 | ##### |  |
| 55 | 2 US | 2020-13 | 4 US-Northe  | 1 | 2 | #####    | ##### |  |
| 56 | 2 US | 2020-13 | 4 US-Northe  | 1 | 3 | 1.815537 | ##### |  |
| 57 | 2 US | 2020-13 | 4 US-Northe  | 1 | 4 | 1.925432 | ##### |  |
| 58 | 2 US | 2020-13 | 4 US-Northe  | 1 | 5 | #####    | ##### |  |
| 59 | 2 US | 2020-13 | 4 US-Northe  | 1 | 5 | #####    | ##### |  |
| 60 | 2 US | 2020-13 | 4 US-Northe  | 2 | 1 | #####    | ##### |  |

|    |   |    |         |              |   |   |          |          |
|----|---|----|---------|--------------|---|---|----------|----------|
| 1  |   |    |         |              |   |   |          |          |
| 2  |   |    |         |              |   |   |          |          |
| 3  | 2 | US | 2020-13 | 4 US-Northea | 2 | 2 | 1        | #####    |
| 4  | 2 | US | 2020-13 | 4 US-Northea | 2 | 3 | #####    | #####    |
| 5  | 2 | US | 2020-13 | 4 US-Northea | 2 | 4 | 1.585526 | #####    |
| 6  | 2 | US | 2020-13 | 4 US-Northea | 2 | 5 | #####    | #####    |
| 7  | 2 | US | 2020-13 | 4 US-Northea | 3 | 1 | 1.912077 | #####    |
| 8  | 2 | US | 2020-13 | 4 US-Northea | 3 | 2 | #####    | #####    |
| 9  | 2 | US | 2020-13 | 4 US-Northea | 3 | 3 | 2.95     | #####    |
| 10 | 2 | US | 2020-13 | 4 US-Northea | 3 | 4 | 2.242991 | #####    |
| 11 | 2 | US | 2020-13 | 4 US-Northea | 3 | 5 | #####    | #####    |
| 12 | 2 | US | 2020-13 | 4 US-Overall | 1 | 1 | 1.532458 | #####    |
| 13 | 2 | US | 2020-13 | 4 US-Overall | 1 | 2 | 1.757464 | #####    |
| 14 | 2 | US | 2020-13 | 4 US-Overall | 1 | 3 | 2.204333 | #####    |
| 15 | 2 | US | 2020-13 | 4 US-Overall | 1 | 4 | 1.293804 | #####    |
| 16 | 2 | US | 2020-13 | 4 US-Overall | 1 | 5 | #####    | #####    |
| 17 | 2 | US | 2020-13 | 4 US-Overall | 2 | 1 | 1.13501  | #####    |
| 18 | 2 | US | 2020-13 | 4 US-Overall | 2 | 2 | 1.602828 | #####    |
| 19 | 2 | US | 2020-13 | 4 US-Overall | 2 | 3 | 1.373134 | #####    |
| 20 | 2 | US | 2020-13 | 4 US-Overall | 2 | 4 | 1.166862 | #####    |
| 21 | 2 | US | 2020-13 | 4 US-Overall | 2 | 5 | #####    | #####    |
| 22 | 2 | US | 2020-13 | 4 US-Overall | 3 | 1 | 1.936068 | #####    |
| 23 | 2 | US | 2020-13 | 4 US-Overall | 3 | 2 | 1.920256 | #####    |
| 24 | 2 | US | 2020-13 | 4 US-Overall | 3 | 3 | 2.852223 | #####    |
| 25 | 2 | US | 2020-13 | 4 US-Overall | 3 | 4 | 1.445419 | #####    |
| 26 | 2 | US | 2020-13 | 4 US-Overall | 3 | 5 | #####    | #####    |
| 27 | 2 | US | 2020-13 | 4 US-South   | 1 | 1 | 1.680769 | #####    |
| 28 | 2 | US | 2020-13 | 4 US-South   | 1 | 2 | 2.264789 | #####    |
| 29 | 2 | US | 2020-13 | 4 US-South   | 1 | 3 | 2.44581  | #####    |
| 30 | 2 | US | 2020-13 | 4 US-South   | 1 | 4 | #####    | #####    |
| 31 | 2 | US | 2020-13 | 4 US-South   | 1 | 5 | #####    | #####    |
| 32 | 2 | US | 2020-13 | 4 US-South   | 2 | 1 | 1.164774 | #####    |
| 33 | 2 | US | 2020-13 | 4 US-South   | 2 | 2 | 1.738462 | #####    |
| 34 | 2 | US | 2020-13 | 4 US-South   | 2 | 3 | 1.38843  | #####    |
| 35 | 2 | US | 2020-13 | 4 US-South   | 2 | 4 | 1.012821 | #####    |
| 36 | 2 | US | 2020-13 | 4 US-South   | 2 | 5 | 0.3      | #####    |
| 37 | 2 | US | 2020-13 | 4 US-South   | 3 | 1 | 2.166297 | #####    |
| 38 | 2 | US | 2020-13 | 4 US-South   | 3 | 2 | 2.826087 | 1.425789 |
| 39 | 2 | US | 2020-13 | 4 US-South   | 3 | 3 | 3.109375 | #####    |
| 40 | 2 | US | 2020-13 | 4 US-South   | 3 | 4 | 0.775    | #####    |
| 41 | 2 | US | 2020-13 | 4 US-South   | 3 | 5 | #####    | #####    |
| 42 | 2 | US | 2020-13 | 4 US-West    | 1 | 1 | 1.317731 | #####    |
| 43 | 2 | US | 2020-13 | 4 US-West    | 1 | 2 | 1.131087 | #####    |
| 44 | 2 | US | 2020-13 | 4 US-West    | 1 | 3 | 1.771223 | #####    |
| 45 | 2 | US | 2020-13 | 4 US-West    | 1 | 4 | 1.385569 | #####    |
| 46 | 2 | US | 2020-13 | 4 US-West    | 1 | 5 | #####    | #####    |
| 47 | 2 | US | 2020-13 | 4 US-West    | 2 | 1 | 1.319983 | #####    |
| 48 | 2 | US | 2020-13 | 4 US-West    | 2 | 2 | 1.617021 | #####    |
| 49 | 2 | US | 2020-13 | 4 US-West    | 2 | 3 | 1.789157 | #####    |
| 50 | 2 | US | 2020-13 | 4 US-West    | 2 | 4 | 1.228261 | #####    |
| 51 | 2 | US | 2020-13 | 4 US-West    | 2 | 5 | #####    | #####    |
| 52 | 2 | US | 2020-13 | 4 US-West    | 3 | 1 | 1.315279 | #####    |
| 53 | 2 | US | 2020-13 | 4 US-West    | 3 | 2 | #####    | #####    |
| 54 | 2 | US | 2020-13 | 4 US-West    | 3 | 3 | 1.753623 | #####    |
| 55 | 2 | US | 2020-13 | 4 US-West    | 3 | 4 | 1.595745 | #####    |
| 56 | 2 | US | 2020-13 | 4 US-West    | 3 | 5 | #####    | #####    |
| 57 | 2 | US | 2020-13 | 5 US-Midwes  | 1 | 1 | #####    | #####    |
| 58 | 2 | US | 2020-13 | 5 US-Midwes  | 1 | 2 | #####    | #####    |
| 59 | 2 | US | 2020-13 | 5 US-Midwes  | 1 | 2 | #####    | #####    |
| 60 | 2 | US | 2020-13 | 5 US-Midwes  | 1 | 2 | #####    | #####    |

|    |      |         |              |   |   |          |       |
|----|------|---------|--------------|---|---|----------|-------|
| 1  |      |         |              |   |   |          |       |
| 2  |      |         |              |   |   |          |       |
| 3  | 2 US | 2020-13 | 5 US-Midwes  | 1 | 3 | #####    | ##### |
| 4  | 2 US | 2020-13 | 5 US-Midwes  | 1 | 4 | #####    | ##### |
| 5  | 2 US | 2020-13 | 5 US-Midwes  | 1 | 5 | #####    | ##### |
| 6  | 2 US | 2020-13 | 5 US-Midwes  | 2 | 1 | #####    | ##### |
| 7  | 2 US | 2020-13 | 5 US-Midwes  | 2 | 2 | #####    | ##### |
| 8  | 2 US | 2020-13 | 5 US-Midwes  | 2 | 3 | #####    | ##### |
| 9  | 2 US | 2020-13 | 5 US-Midwes  | 2 | 4 | #####    | ##### |
| 10 | 2 US | 2020-13 | 5 US-Midwes  | 2 | 5 | #####    | ##### |
| 11 | 2 US | 2020-13 | 5 US-Midwes  | 3 | 1 | #####    | ##### |
| 12 | 2 US | 2020-13 | 5 US-Midwes  | 3 | 2 | #####    | ##### |
| 13 | 2 US | 2020-13 | 5 US-Midwes  | 3 | 3 | 0.8      | ##### |
| 14 | 2 US | 2020-13 | 5 US-Midwes  | 3 | 4 | #####    | ##### |
| 15 | 2 US | 2020-13 | 5 US-Midwes  | 3 | 5 | 1.075949 | ##### |
| 16 | 2 US | 2020-13 | 5 US-Northea | 1 | 1 | #####    | ##### |
| 17 | 2 US | 2020-13 | 5 US-Northea | 1 | 2 | #####    | ##### |
| 18 | 2 US | 2020-13 | 5 US-Northea | 1 | 3 | #####    | ##### |
| 19 | 2 US | 2020-13 | 5 US-Northea | 1 | 4 | #####    | ##### |
| 20 | 2 US | 2020-13 | 5 US-Northea | 1 | 5 | #####    | ##### |
| 21 | 2 US | 2020-13 | 5 US-Northea | 2 | 1 | #####    | ##### |
| 22 | 2 US | 2020-13 | 5 US-Northea | 2 | 2 | #####    | ##### |
| 23 | 2 US | 2020-13 | 5 US-Northea | 2 | 3 | #####    | ##### |
| 24 | 2 US | 2020-13 | 5 US-Northea | 2 | 4 | #####    | ##### |
| 25 | 2 US | 2020-13 | 5 US-Northea | 2 | 5 | #####    | ##### |
| 26 | 2 US | 2020-13 | 5 US-Northea | 2 | 5 | #####    | ##### |
| 27 | 2 US | 2020-13 | 5 US-Northea | 3 | 1 | #####    | ##### |
| 28 | 2 US | 2020-13 | 5 US-Northea | 3 | 2 | 1.1875   | ##### |
| 29 | 2 US | 2020-13 | 5 US-Northea | 3 | 3 | #####    | ##### |
| 30 | 2 US | 2020-13 | 5 US-Northea | 3 | 4 | #####    | ##### |
| 31 | 2 US | 2020-13 | 5 US-Northea | 3 | 5 | 1.257732 | ##### |
| 32 | 2 US | 2020-13 | 5 US-Overall | 1 | 1 | #####    | ##### |
| 33 | 2 US | 2020-13 | 5 US-Overall | 1 | 2 | #####    | ##### |
| 34 | 2 US | 2020-13 | 5 US-Overall | 1 | 3 | #####    | ##### |
| 35 | 2 US | 2020-13 | 5 US-Overall | 1 | 4 | #####    | ##### |
| 36 | 2 US | 2020-13 | 5 US-Overall | 1 | 5 | #####    | ##### |
| 37 | 2 US | 2020-13 | 5 US-Overall | 2 | 1 | #####    | ##### |
| 38 | 2 US | 2020-13 | 5 US-Overall | 2 | 2 | #####    | ##### |
| 39 | 2 US | 2020-13 | 5 US-Overall | 2 | 3 | #####    | ##### |
| 40 | 2 US | 2020-13 | 5 US-Overall | 2 | 4 | #####    | ##### |
| 41 | 2 US | 2020-13 | 5 US-Overall | 2 | 5 | #####    | ##### |
| 42 | 2 US | 2020-13 | 5 US-Overall | 3 | 1 | #####    | ##### |
| 43 | 2 US | 2020-13 | 5 US-Overall | 3 | 2 | #####    | ##### |
| 44 | 2 US | 2020-13 | 5 US-Overall | 3 | 3 | #####    | ##### |
| 45 | 2 US | 2020-13 | 5 US-Overall | 3 | 4 | 1.022312 | ##### |
| 46 | 2 US | 2020-13 | 5 US-Overall | 3 | 5 | 1.125534 | ##### |
| 47 | 2 US | 2020-13 | 5 US-South   | 1 | 1 | #####    | ##### |
| 48 | 2 US | 2020-13 | 5 US-South   | 1 | 2 | #####    | ##### |
| 49 | 2 US | 2020-13 | 5 US-South   | 1 | 3 | #####    | ##### |
| 50 | 2 US | 2020-13 | 5 US-South   | 1 | 4 | 1.095101 | ##### |
| 51 | 2 US | 2020-13 | 5 US-South   | 1 | 5 | #####    | ##### |
| 52 | 2 US | 2020-13 | 5 US-South   | 2 | 1 | #####    | ##### |
| 53 | 2 US | 2020-13 | 5 US-South   | 2 | 2 | #####    | ##### |
| 54 | 2 US | 2020-13 | 5 US-South   | 2 | 3 | #####    | ##### |
| 55 | 2 US | 2020-13 | 5 US-South   | 2 | 4 | #####    | ##### |
| 56 | 2 US | 2020-13 | 5 US-South   | 2 | 5 | #####    | ##### |
| 57 | 2 US | 2020-13 | 5 US-South   | 3 | 1 | #####    | ##### |
| 58 | 2 US | 2020-13 | 5 US-South   | 3 | 2 | 1.04     | ##### |
| 59 | 2 US | 2020-13 | 5 US-South   | 3 | 3 | #####    | ##### |
| 60 | 2 US | 2020-13 | 5 US-South   | 3 | 3 | #####    | ##### |

|    |      |         |              |   |   |          |          |  |
|----|------|---------|--------------|---|---|----------|----------|--|
| 1  |      |         |              |   |   |          |          |  |
| 2  |      |         |              |   |   |          |          |  |
| 3  | 2 US | 2020-13 | 5 US-South   | 3 | 4 | 1.346154 | #####    |  |
| 4  | 2 US | 2020-13 | 5 US-South   | 3 | 5 | 1.177778 | #####    |  |
| 5  | 2 US | 2020-13 | 5 US-West    | 1 | 1 | #####    | #####    |  |
| 6  | 2 US | 2020-13 | 5 US-West    | 1 | 2 | #####    | #####    |  |
| 7  | 2 US | 2020-13 | 5 US-West    | 1 | 3 | #####    | #####    |  |
| 8  | 2 US | 2020-13 | 5 US-West    | 1 | 4 | #####    | #####    |  |
| 9  | 2 US | 2020-13 | 5 US-West    | 1 | 5 | #####    | #####    |  |
| 10 | 2 US | 2020-13 | 5 US-West    | 2 | 1 | #####    | #####    |  |
| 11 | 2 US | 2020-13 | 5 US-West    | 2 | 2 | 0.4375   | #####    |  |
| 12 | 2 US | 2020-13 | 5 US-West    | 2 | 3 | #####    | #####    |  |
| 13 | 2 US | 2020-13 | 5 US-West    | 2 | 4 | #####    | #####    |  |
| 14 | 2 US | 2020-13 | 5 US-West    | 2 | 5 | #####    | #####    |  |
| 15 | 2 US | 2020-13 | 5 US-West    | 3 | 1 | 1.00449  | #####    |  |
| 16 | 2 US | 2020-13 | 5 US-West    | 3 | 2 | 1.038462 | #####    |  |
| 17 | 2 US | 2020-13 | 5 US-West    | 3 | 3 | 1.114286 | #####    |  |
| 18 | 2 US | 2020-13 | 5 US-West    | 3 | 4 | 0.8      | #####    |  |
| 19 | 2 US | 2020-13 | 5 US-West    | 3 | 5 | #####    | #####    |  |
| 20 | 2 US | 2020-14 | 1 US-Midwes  | 1 | 1 | 3.639929 | #####    |  |
| 21 | 2 US | 2020-14 | 1 US-Midwes  | 1 | 2 | 3.650757 | #####    |  |
| 22 | 2 US | 2020-14 | 1 US-Midwes  | 1 | 3 | 4.885904 | #####    |  |
| 23 | 2 US | 2020-14 | 1 US-Midwes  | 1 | 4 | 3.278146 | #####    |  |
| 24 | 2 US | 2020-14 | 1 US-Midwes  | 1 | 5 | 2.186314 | #####    |  |
| 25 | 2 US | 2020-14 | 1 US-Midwes  | 2 | 1 | 3.303229 | #####    |  |
| 26 | 2 US | 2020-14 | 1 US-Midwes  | 2 | 2 | 3.588235 | #####    |  |
| 27 | 2 US | 2020-14 | 1 US-Midwes  | 2 | 3 | 4.056338 | #####    |  |
| 28 | 2 US | 2020-14 | 1 US-Midwes  | 2 | 4 | 3.030303 | #####    |  |
| 29 | 2 US | 2020-14 | 1 US-Midwes  | 2 | 5 | 2.241071 | #####    |  |
| 30 | 2 US | 2020-14 | 1 US-Midwes  | 3 | 1 | 4.13466  | #####    |  |
| 31 | 2 US | 2020-14 | 1 US-Midwes  | 3 | 2 | 3.75     | 1.291718 |  |
| 32 | 2 US | 2020-14 | 1 US-Midwes  | 3 | 3 | 6.157895 | 1.110637 |  |
| 33 | 2 US | 2020-14 | 1 US-Midwes  | 3 | 4 | 3.61039  | #####    |  |
| 34 | 2 US | 2020-14 | 1 US-Midwes  | 3 | 5 | 2.104478 | #####    |  |
| 35 | 2 US | 2020-14 | 1 US-Northea | 1 | 1 | 3.349236 | #####    |  |
| 36 | 2 US | 2020-14 | 1 US-Northea | 1 | 2 | 2.730056 | #####    |  |
| 37 | 2 US | 2020-14 | 1 US-Northea | 1 | 3 | 4.086024 | #####    |  |
| 38 | 2 US | 2020-14 | 1 US-Northea | 1 | 4 | 3.642034 | #####    |  |
| 39 | 2 US | 2020-14 | 1 US-Northea | 1 | 5 | 2.085592 | #####    |  |
| 40 | 2 US | 2020-14 | 1 US-Northea | 2 | 1 | 3.256678 | #####    |  |
| 41 | 2 US | 2020-14 | 1 US-Northea | 2 | 2 | 3.6      | #####    |  |
| 42 | 2 US | 2020-14 | 1 US-Northea | 2 | 3 | 3.862745 | #####    |  |
| 43 | 2 US | 2020-14 | 1 US-Northea | 2 | 4 | 3.37415  | #####    |  |
| 44 | 2 US | 2020-14 | 1 US-Northea | 2 | 5 | 2.072165 | #####    |  |
| 45 | 2 US | 2020-14 | 1 US-Northea | 3 | 1 | 3.5098   | #####    |  |
| 46 | 2 US | 2020-14 | 1 US-Northea | 3 | 2 | 2        | #####    |  |
| 47 | 2 US | 2020-14 | 1 US-Northea | 3 | 3 | 4.478261 | #####    |  |
| 48 | 2 US | 2020-14 | 1 US-Northea | 3 | 4 | 4.16     | #####    |  |
| 49 | 2 US | 2020-14 | 1 US-Northea | 3 | 5 | 2.116279 | #####    |  |
| 50 | 2 US | 2020-14 | 1 US-Overall | 1 | 1 | 3.557117 | #####    |  |
| 51 | 2 US | 2020-14 | 1 US-Overall | 1 | 2 | 3.287267 | #####    |  |
| 52 | 2 US | 2020-14 | 1 US-Overall | 1 | 3 | 4.427246 | #####    |  |
| 53 | 2 US | 2020-14 | 1 US-Overall | 1 | 4 | 3.539776 | #####    |  |
| 54 | 2 US | 2020-14 | 1 US-Overall | 1 | 5 | 2.157745 | #####    |  |
| 55 | 2 US | 2020-14 | 1 US-Overall | 2 | 1 | 3.312348 | #####    |  |
| 56 | 2 US | 2020-14 | 1 US-Overall | 2 | 2 | 3.488397 | #####    |  |
| 57 | 2 US | 2020-14 | 1 US-Overall | 2 | 3 | 3.965391 | #####    |  |
| 58 | 2 US | 2020-14 | 1 US-Overall | 2 | 4 | 3.244444 | #####    |  |
| 59 | 2 US | 2020-14 | 1 US-Overall | 2 |   |          |          |  |
| 60 | 2 US | 2020-14 | 1 US-Overall | 2 |   |          |          |  |



|    |      |         |              |   |   |          |          |  |
|----|------|---------|--------------|---|---|----------|----------|--|
| 1  |      |         |              |   |   |          |          |  |
| 2  |      |         |              |   |   |          |          |  |
| 3  | 2 US | 2020-14 | 1 US-Overall | 2 | 5 | 2.082941 | #####    |  |
| 4  | 2 US | 2020-14 | 1 US-Overall | 3 | 1 | 3.934558 | #####    |  |
| 5  | 2 US | 2020-14 | 1 US-Overall | 3 | 2 | 3.042024 | #####    |  |
| 6  | 2 US | 2020-14 | 1 US-Overall | 3 | 3 | 5.164172 | #####    |  |
| 7  | 2 US | 2020-14 | 1 US-Overall | 3 | 4 | 4.007121 | #####    |  |
| 8  | 2 US | 2020-14 | 1 US-Overall | 3 | 5 | 2.284333 | #####    |  |
| 9  | 2 US | 2020-14 | 1 US-South   | 1 | 1 | 3.581431 | #####    |  |
| 10 | 2 US | 2020-14 | 1 US-South   | 1 | 2 | 3.059234 | #####    |  |
| 11 | 2 US | 2020-14 | 1 US-South   | 1 | 3 | 4.566231 | #####    |  |
| 12 | 2 US | 2020-14 | 1 US-South   | 1 | 4 | 3.525926 | #####    |  |
| 13 | 2 US | 2020-14 | 1 US-South   | 1 | 5 | 2.191515 | #####    |  |
| 14 | 2 US | 2020-14 | 1 US-South   | 2 | 1 | 3.388921 | #####    |  |
| 15 | 2 US | 2020-14 | 1 US-South   | 2 | 2 | 3.714286 | #####    |  |
| 16 | 2 US | 2020-14 | 1 US-South   | 2 | 3 | 4.109375 | #####    |  |
| 17 | 2 US | 2020-14 | 1 US-South   | 2 | 4 | 3.173653 | #####    |  |
| 18 | 2 US | 2020-14 | 1 US-South   | 2 | 5 | 2.051282 | #####    |  |
| 19 | 2 US | 2020-14 | 1 US-South   | 3 | 1 | 3.890704 | #####    |  |
| 20 | 2 US | 2020-14 | 1 US-South   | 3 | 2 | 2.272727 | #####    |  |
| 21 | 2 US | 2020-14 | 1 US-South   | 3 | 3 | 5.375    | 1.548821 |  |
| 22 | 2 US | 2020-14 | 1 US-South   | 3 | 4 | 4.102941 | #####    |  |
| 23 | 2 US | 2020-14 | 1 US-South   | 3 | 5 | 2.428571 | #####    |  |
| 24 | 2 US | 2020-14 | 1 US-West    | 1 | 1 | 3.584954 | #####    |  |
| 25 | 2 US | 2020-14 | 1 US-West    | 1 | 2 | 3.68929  | #####    |  |
| 26 | 2 US | 2020-14 | 1 US-West    | 1 | 3 | 4.049552 | #####    |  |
| 27 | 2 US | 2020-14 | 1 US-West    | 1 | 4 | 3.738329 | #####    |  |
| 28 | 2 US | 2020-14 | 1 US-West    | 1 | 5 | 2.12731  | #####    |  |
| 29 | 2 US | 2020-14 | 1 US-West    | 2 | 1 | 3.219099 | #####    |  |
| 30 | 2 US | 2020-14 | 1 US-West    | 2 | 2 | 2.878788 | #####    |  |
| 31 | 2 US | 2020-14 | 1 US-West    | 2 | 3 | 3.700787 | #####    |  |
| 32 | 2 US | 2020-14 | 1 US-West    | 2 | 4 | 3.468085 | #####    |  |
| 33 | 2 US | 2020-14 | 1 US-West    | 2 | 5 | 1.981481 | #####    |  |
| 34 | 2 US | 2020-14 | 1 US-West    | 3 | 1 | 4.090603 | #####    |  |
| 35 | 2 US | 2020-14 | 1 US-West    | 3 | 2 | 4.666667 | 1.454617 |  |
| 36 | 2 US | 2020-14 | 1 US-West    | 3 | 3 | 4.512821 | #####    |  |
| 37 | 2 US | 2020-14 | 1 US-West    | 3 | 4 | 4.138462 | #####    |  |
| 38 | 2 US | 2020-14 | 1 US-West    | 3 | 5 | 2.348485 | #####    |  |
| 39 | 2 US | 2020-14 | 2 US-Midwes  | 1 | 1 | 1.600785 | #####    |  |
| 40 | 2 US | 2020-14 | 2 US-Midwes  | 1 | 2 | 1.890664 | #####    |  |
| 41 | 2 US | 2020-14 | 2 US-Midwes  | 1 | 3 | 1.922807 | #####    |  |
| 42 | 2 US | 2020-14 | 2 US-Midwes  | 1 | 4 | 1.381752 | #####    |  |
| 43 | 2 US | 2020-14 | 2 US-Midwes  | 1 | 5 | 1.17428  | #####    |  |
| 44 | 2 US | 2020-14 | 2 US-Midwes  | 2 | 1 | 1.650682 | #####    |  |
| 45 | 2 US | 2020-14 | 2 US-Midwes  | 2 | 2 | 2.018519 | #####    |  |
| 46 | 2 US | 2020-14 | 2 US-Midwes  | 2 | 3 | 2.013245 | #####    |  |
| 47 | 2 US | 2020-14 | 2 US-Midwes  | 2 | 4 | 1.40884  | #####    |  |
| 48 | 2 US | 2020-14 | 2 US-Midwes  | 2 | 5 | 1.112069 | #####    |  |
| 49 | 2 US | 2020-14 | 2 US-Midwes  | 3 | 1 | 1.530116 | #####    |  |
| 50 | 2 US | 2020-14 | 2 US-Midwes  | 3 | 2 | 1.692308 | #####    |  |
| 51 | 2 US | 2020-14 | 2 US-Midwes  | 3 | 3 | 1.795455 | #####    |  |
| 52 | 2 US | 2020-14 | 2 US-Midwes  | 3 | 4 | 1.345238 | #####    |  |
| 53 | 2 US | 2020-14 | 2 US-Midwes  | 3 | 5 | 1.263889 | #####    |  |
| 54 | 2 US | 2020-14 | 2 US-Northe  | 1 | 1 | 1.698197 | #####    |  |
| 55 | 2 US | 2020-14 | 2 US-Northe  | 1 | 2 | 2.215193 | #####    |  |
| 56 | 2 US | 2020-14 | 2 US-Northe  | 1 | 3 | 2.017342 | #####    |  |
| 57 | 2 US | 2020-14 | 2 US-Northe  | 1 | 4 | 1.489924 | #####    |  |
| 58 | 2 US | 2020-14 | 2 US-Northe  | 1 | 5 | 1.187747 | #####    |  |
| 59 | 2 US | 2020-14 | 2 US-Northe  | 1 |   |          |          |  |
| 60 | 2 US | 2020-14 | 2 US-Northe  | 1 |   |          |          |  |

|    |      |         |              |   |   |          |       |  |
|----|------|---------|--------------|---|---|----------|-------|--|
| 1  |      |         |              |   |   |          |       |  |
| 2  |      |         |              |   |   |          |       |  |
| 3  | 2 US | 2020-14 | 2 US-Northe  | 2 | 1 | 1.677759 | ##### |  |
| 4  | 2 US | 2020-14 | 2 US-Northe  | 2 | 2 | 2.36     | ##### |  |
| 5  | 2 US | 2020-14 | 2 US-Northe  | 2 | 3 | 1.938053 | ##### |  |
| 6  | 2 US | 2020-14 | 2 US-Northe  | 2 | 4 | 1.556962 | ##### |  |
| 7  | 2 US | 2020-14 | 2 US-Northe  | 2 | 5 | 1.168317 | ##### |  |
| 8  | 2 US | 2020-14 | 2 US-Northe  | 3 | 1 | 1.732766 | ##### |  |
| 9  | 2 US | 2020-14 | 2 US-Northe  | 3 | 2 | 2.090909 | ##### |  |
| 10 | 2 US | 2020-14 | 2 US-Northe  | 3 | 3 | 2.153846 | ##### |  |
| 11 | 2 US | 2020-14 | 2 US-Northe  | 3 | 4 | 1.358491 | ##### |  |
| 12 | 2 US | 2020-14 | 2 US-Northe  | 3 | 5 | 1.229167 | ##### |  |
| 13 | 2 US | 2020-14 | 2 US-Overall | 1 | 1 | 1.569645 | ##### |  |
| 14 | 2 US | 2020-14 | 2 US-Overall | 1 | 2 | 1.852799 | ##### |  |
| 15 | 2 US | 2020-14 | 2 US-Overall | 1 | 3 | 1.743207 | ##### |  |
| 16 | 2 US | 2020-14 | 2 US-Overall | 1 | 4 | 1.452079 | ##### |  |
| 17 | 2 US | 2020-14 | 2 US-Overall | 1 | 5 | 1.182554 | ##### |  |
| 18 | 2 US | 2020-14 | 2 US-Overall | 2 | 1 | 1.663544 | ##### |  |
| 19 | 2 US | 2020-14 | 2 US-Overall | 2 | 2 | 2.084125 | ##### |  |
| 20 | 2 US | 2020-14 | 2 US-Overall | 2 | 3 | 1.927761 | ##### |  |
| 21 | 2 US | 2020-14 | 2 US-Overall | 2 | 4 | 1.496488 | ##### |  |
| 22 | 2 US | 2020-14 | 2 US-Overall | 2 | 5 | 1.124282 | ##### |  |
| 23 | 2 US | 2020-14 | 2 US-Overall | 3 | 1 | 1.43039  | ##### |  |
| 24 | 2 US | 2020-14 | 2 US-Overall | 3 | 2 | 1.596951 | ##### |  |
| 25 | 2 US | 2020-14 | 2 US-Overall | 3 | 3 | 1.456136 | ##### |  |
| 26 | 2 US | 2020-14 | 2 US-Overall | 3 | 4 | 1.382707 | ##### |  |
| 27 | 2 US | 2020-14 | 2 US-Overall | 3 | 5 | 1.276945 | ##### |  |
| 28 | 2 US | 2020-14 | 2 US-South   | 1 | 1 | 1.55339  | ##### |  |
| 29 | 2 US | 2020-14 | 2 US-South   | 1 | 2 | 1.889338 | ##### |  |
| 30 | 2 US | 2020-14 | 2 US-South   | 1 | 3 | 1.601935 | ##### |  |
| 31 | 2 US | 2020-14 | 2 US-South   | 1 | 4 | 1.505105 | ##### |  |
| 32 | 2 US | 2020-14 | 2 US-South   | 1 | 5 | 1.195118 | ##### |  |
| 33 | 2 US | 2020-14 | 2 US-South   | 2 | 1 | 1.710672 | ##### |  |
| 34 | 2 US | 2020-14 | 2 US-South   | 2 | 2 | 2.351351 | ##### |  |
| 35 | 2 US | 2020-14 | 2 US-South   | 2 | 3 | 1.926471 | ##### |  |
| 36 | 2 US | 2020-14 | 2 US-South   | 2 | 4 | 1.516667 | ##### |  |
| 37 | 2 US | 2020-14 | 2 US-South   | 2 | 5 | 1.092437 | ##### |  |
| 38 | 2 US | 2020-14 | 2 US-South   | 3 | 1 | 1.315434 | ##### |  |
| 39 | 2 US | 2020-14 | 2 US-South   | 3 | 2 | 1.428571 | ##### |  |
| 40 | 2 US | 2020-14 | 2 US-South   | 3 | 3 | 1.038462 | ##### |  |
| 41 | 2 US | 2020-14 | 2 US-South   | 3 | 4 | 1.486842 | ##### |  |
| 42 | 2 US | 2020-14 | 2 US-South   | 3 | 5 | 1.363636 | ##### |  |
| 43 | 2 US | 2020-14 | 2 US-West    | 1 | 1 | 1.47631  | ##### |  |
| 44 | 2 US | 2020-14 | 2 US-West    | 1 | 2 | 1.507254 | ##### |  |
| 45 | 2 US | 2020-14 | 2 US-West    | 1 | 3 | 1.662654 | ##### |  |
| 46 | 2 US | 2020-14 | 2 US-West    | 1 | 4 | 1.386134 | ##### |  |
| 47 | 2 US | 2020-14 | 2 US-West    | 1 | 5 | 1.164435 | ##### |  |
| 48 | 2 US | 2020-14 | 2 US-West    | 2 | 1 | 1.57644  | ##### |  |
| 49 | 2 US | 2020-14 | 2 US-West    | 2 | 2 | 1.513514 | ##### |  |
| 50 | 2 US | 2020-14 | 2 US-West    | 2 | 3 | 1.855072 | ##### |  |
| 51 | 2 US | 2020-14 | 2 US-West    | 2 | 4 | 1.483444 | ##### |  |
| 52 | 2 US | 2020-14 | 2 US-West    | 2 | 5 | 1.153153 | ##### |  |
| 53 | 2 US | 2020-14 | 2 US-West    | 3 | 1 | 1.340066 | ##### |  |
| 54 | 2 US | 2020-14 | 2 US-West    | 3 | 2 | 1.5      | ##### |  |
| 55 | 2 US | 2020-14 | 2 US-West    | 3 | 3 | 1.404762 | ##### |  |
| 56 | 2 US | 2020-14 | 2 US-West    | 3 | 4 | 1.242857 | ##### |  |
| 57 | 2 US | 2020-14 | 2 US-West    | 3 | 5 | 1.180556 | ##### |  |
| 58 | 2 US | 2020-14 | 3 US-Midwes  | 1 | 1 | 0        | 0     |  |
| 59 | 2 US | 2020-14 |              |   |   |          |       |  |
| 60 | 2 US | 2020-14 |              |   |   |          |       |  |

|    |      |         |              |   |   |   |   |
|----|------|---------|--------------|---|---|---|---|
| 1  |      |         |              |   |   |   |   |
| 2  |      |         |              |   |   |   |   |
| 3  | 2 US | 2020-14 | 3 US-Midwes  | 1 | 2 | 0 | 0 |
| 4  | 2 US | 2020-14 | 3 US-Midwes  | 1 | 3 | 0 | 0 |
| 5  | 2 US | 2020-14 | 3 US-Midwes  | 1 | 4 | 0 | 0 |
| 6  | 2 US | 2020-14 | 3 US-Midwes  | 1 | 5 | 0 | 0 |
| 7  | 2 US | 2020-14 | 3 US-Midwes  | 2 | 1 | 0 | 0 |
| 8  | 2 US | 2020-14 | 3 US-Midwes  | 2 | 2 | 0 | 0 |
| 9  | 2 US | 2020-14 | 3 US-Midwes  | 2 | 3 | 0 | 0 |
| 10 | 2 US | 2020-14 | 3 US-Midwes  | 2 | 4 | 0 | 0 |
| 11 | 2 US | 2020-14 | 3 US-Midwes  | 2 | 5 | 0 | 0 |
| 12 | 2 US | 2020-14 | 3 US-Midwes  | 3 | 1 | 0 | 0 |
| 13 | 2 US | 2020-14 | 3 US-Midwes  | 3 | 2 | 0 | 0 |
| 14 | 2 US | 2020-14 | 3 US-Midwes  | 3 | 3 | 0 | 0 |
| 15 | 2 US | 2020-14 | 3 US-Midwes  | 3 | 4 | 0 | 0 |
| 16 | 2 US | 2020-14 | 3 US-Midwes  | 3 | 5 | 0 | 0 |
| 17 | 2 US | 2020-14 | 3 US-Northea | 1 | 1 | 0 | 0 |
| 18 | 2 US | 2020-14 | 3 US-Northea | 1 | 2 | 0 | 0 |
| 19 | 2 US | 2020-14 | 3 US-Northea | 1 | 3 | 0 | 0 |
| 20 | 2 US | 2020-14 | 3 US-Northea | 1 | 4 | 0 | 0 |
| 21 | 2 US | 2020-14 | 3 US-Northea | 1 | 5 | 0 | 0 |
| 22 | 2 US | 2020-14 | 3 US-Northea | 2 | 1 | 0 | 0 |
| 23 | 2 US | 2020-14 | 3 US-Northea | 2 | 2 | 0 | 0 |
| 24 | 2 US | 2020-14 | 3 US-Northea | 2 | 3 | 0 | 0 |
| 25 | 2 US | 2020-14 | 3 US-Northea | 2 | 4 | 0 | 0 |
| 26 | 2 US | 2020-14 | 3 US-Northea | 2 | 5 | 0 | 0 |
| 27 | 2 US | 2020-14 | 3 US-Northea | 3 | 1 | 0 | 0 |
| 28 | 2 US | 2020-14 | 3 US-Northea | 3 | 2 | 0 | 0 |
| 29 | 2 US | 2020-14 | 3 US-Northea | 3 | 3 | 0 | 0 |
| 30 | 2 US | 2020-14 | 3 US-Northea | 3 | 4 | 0 | 0 |
| 31 | 2 US | 2020-14 | 3 US-Northea | 3 | 5 | 0 | 0 |
| 32 | 2 US | 2020-14 | 3 US-Overall | 1 | 1 | 0 | 0 |
| 33 | 2 US | 2020-14 | 3 US-Overall | 1 | 2 | 0 | 0 |
| 34 | 2 US | 2020-14 | 3 US-Overall | 1 | 3 | 0 | 0 |
| 35 | 2 US | 2020-14 | 3 US-Overall | 1 | 4 | 0 | 0 |
| 36 | 2 US | 2020-14 | 3 US-Overall | 1 | 5 | 0 | 0 |
| 37 | 2 US | 2020-14 | 3 US-Overall | 2 | 1 | 0 | 0 |
| 38 | 2 US | 2020-14 | 3 US-Overall | 2 | 2 | 0 | 0 |
| 39 | 2 US | 2020-14 | 3 US-Overall | 2 | 3 | 0 | 0 |
| 40 | 2 US | 2020-14 | 3 US-Overall | 2 | 4 | 0 | 0 |
| 41 | 2 US | 2020-14 | 3 US-Overall | 2 | 5 | 0 | 0 |
| 42 | 2 US | 2020-14 | 3 US-Overall | 3 | 1 | 0 | 0 |
| 43 | 2 US | 2020-14 | 3 US-Overall | 3 | 2 | 0 | 0 |
| 44 | 2 US | 2020-14 | 3 US-Overall | 3 | 3 | 0 | 0 |
| 45 | 2 US | 2020-14 | 3 US-Overall | 3 | 4 | 0 | 0 |
| 46 | 2 US | 2020-14 | 3 US-Overall | 3 | 5 | 0 | 0 |
| 47 | 2 US | 2020-14 | 3 US-South   | 1 | 1 | 0 | 0 |
| 48 | 2 US | 2020-14 | 3 US-South   | 1 | 2 | 0 | 0 |
| 49 | 2 US | 2020-14 | 3 US-South   | 1 | 3 | 0 | 0 |
| 50 | 2 US | 2020-14 | 3 US-South   | 1 | 4 | 0 | 0 |
| 51 | 2 US | 2020-14 | 3 US-South   | 1 | 5 | 0 | 0 |
| 52 | 2 US | 2020-14 | 3 US-South   | 2 | 1 | 0 | 0 |
| 53 | 2 US | 2020-14 | 3 US-South   | 2 | 2 | 0 | 0 |
| 54 | 2 US | 2020-14 | 3 US-South   | 2 | 3 | 0 | 0 |
| 55 | 2 US | 2020-14 | 3 US-South   | 2 | 4 | 0 | 0 |
| 56 | 2 US | 2020-14 | 3 US-South   | 2 | 5 | 0 | 0 |
| 57 | 2 US | 2020-14 | 3 US-South   | 3 | 1 | 0 | 0 |
| 58 | 2 US | 2020-14 | 3 US-South   | 3 | 2 | 0 | 0 |
| 59 | 2 US | 2020-14 | 3 US-South   | 3 |   |   |   |
| 60 | 2 US | 2020-14 | 3 US-South   | 3 | 2 | 0 | 0 |

|    |      |         |              |   |   |          |          |  |
|----|------|---------|--------------|---|---|----------|----------|--|
| 1  |      |         |              |   |   |          |          |  |
| 2  |      |         |              |   |   |          |          |  |
| 3  | 2 US | 2020-14 | 3 US-South   | 3 | 3 | 0        | 0        |  |
| 4  | 2 US | 2020-14 | 3 US-South   | 3 | 4 | 0        | 0        |  |
| 5  | 2 US | 2020-14 | 3 US-South   | 3 | 5 | 0        | 0        |  |
| 6  | 2 US | 2020-14 | 3 US-West    | 1 | 1 | 0        | 0        |  |
| 7  | 2 US | 2020-14 | 3 US-West    | 1 | 2 | 0        | 0        |  |
| 8  | 2 US | 2020-14 | 3 US-West    | 1 | 3 | 0        | 0        |  |
| 9  | 2 US | 2020-14 | 3 US-West    | 1 | 4 | 0        | 0        |  |
| 10 | 2 US | 2020-14 | 3 US-West    | 1 | 5 | 0        | 0        |  |
| 11 | 2 US | 2020-14 | 3 US-West    | 2 | 1 | 0        | 0        |  |
| 12 | 2 US | 2020-14 | 3 US-West    | 2 | 2 | 0        | 0        |  |
| 13 | 2 US | 2020-14 | 3 US-West    | 2 | 3 | 0        | 0        |  |
| 14 | 2 US | 2020-14 | 3 US-West    | 2 | 4 | 0        | 0        |  |
| 15 | 2 US | 2020-14 | 3 US-West    | 2 | 5 | 0        | 0        |  |
| 16 | 2 US | 2020-14 | 3 US-West    | 3 | 1 | 0        | 0        |  |
| 17 | 2 US | 2020-14 | 3 US-West    | 3 | 2 | 0        | 0        |  |
| 18 | 2 US | 2020-14 | 3 US-West    | 3 | 3 | 0        | 0        |  |
| 19 | 2 US | 2020-14 | 3 US-West    | 3 | 4 | 0        | 0        |  |
| 20 | 2 US | 2020-14 | 3 US-West    | 3 | 5 | 0        | 0        |  |
| 21 | 2 US | 2020-14 | 3 US-West    | 3 | 5 | 0        | 0        |  |
| 22 | 2 US | 2020-14 | 4 US-Midwes  | 1 | 1 | 1.428893 | #####    |  |
| 23 | 2 US | 2020-14 | 4 US-Midwes  | 1 | 2 | 1.088506 | #####    |  |
| 24 | 2 US | 2020-14 | 4 US-Midwes  | 1 | 3 | 2.283864 | #####    |  |
| 25 | 2 US | 2020-14 | 4 US-Midwes  | 1 | 4 | 1.359449 | #####    |  |
| 26 | 2 US | 2020-14 | 4 US-Midwes  | 1 | 5 | #####    | #####    |  |
| 27 | 2 US | 2020-14 | 4 US-Midwes  | 2 | 1 | 1.134955 | #####    |  |
| 28 | 2 US | 2020-14 | 4 US-Midwes  | 2 | 2 | #####    | #####    |  |
| 29 | 2 US | 2020-14 | 4 US-Midwes  | 2 | 3 | 1.6625   | #####    |  |
| 30 | 2 US | 2020-14 | 4 US-Midwes  | 2 | 4 | 1.172043 | #####    |  |
| 31 | 2 US | 2020-14 | 4 US-Midwes  | 2 | 5 | #####    | #####    |  |
| 32 | 2 US | 2020-14 | 4 US-Midwes  | 3 | 1 | 1.851542 | #####    |  |
| 33 | 2 US | 2020-14 | 4 US-Midwes  | 3 | 2 | 1.642857 | 1.260141 |  |
| 34 | 2 US | 2020-14 | 4 US-Midwes  | 3 | 3 | 3.232558 | #####    |  |
| 35 | 2 US | 2020-14 | 4 US-Midwes  | 3 | 4 | 1.619048 | #####    |  |
| 36 | 2 US | 2020-14 | 4 US-Midwes  | 3 | 5 | #####    | #####    |  |
| 37 | 2 US | 2020-14 | 4 US-Northea | 1 | 1 | 1.297454 | #####    |  |
| 38 | 2 US | 2020-14 | 4 US-Northea | 1 | 2 | #####    | #####    |  |
| 39 | 2 US | 2020-14 | 4 US-Northea | 1 | 3 | 1.998848 | #####    |  |
| 40 | 2 US | 2020-14 | 4 US-Northea | 1 | 4 | 1.486879 | #####    |  |
| 41 | 2 US | 2020-14 | 4 US-Northea | 1 | 5 | #####    | #####    |  |
| 42 | 2 US | 2020-14 | 4 US-Northea | 2 | 1 | 1.01686  | #####    |  |
| 43 | 2 US | 2020-14 | 4 US-Northea | 2 | 2 | #####    | #####    |  |
| 44 | 2 US | 2020-14 | 4 US-Northea | 2 | 3 | 1.325    | #####    |  |
| 45 | 2 US | 2020-14 | 4 US-Northea | 2 | 4 | 1.064935 | #####    |  |
| 46 | 2 US | 2020-14 | 4 US-Northea | 2 | 5 | #####    | #####    |  |
| 47 | 2 US | 2020-14 | 4 US-Northea | 3 | 1 | 1.761455 | #####    |  |
| 48 | 2 US | 2020-14 | 4 US-Northea | 3 | 2 | #####    | #####    |  |
| 49 | 2 US | 2020-14 | 4 US-Northea | 3 | 3 | 3.185185 | 1.165433 |  |
| 50 | 2 US | 2020-14 | 4 US-Northea | 3 | 4 | 2.25     | #####    |  |
| 51 | 2 US | 2020-14 | 4 US-Northea | 3 | 5 | 0        | 0        |  |
| 52 | 2 US | 2020-14 | 4 US-Overall | 1 | 1 | 1.296318 | #####    |  |
| 53 | 2 US | 2020-14 | 4 US-Overall | 1 | 2 | #####    | #####    |  |
| 54 | 2 US | 2020-14 | 4 US-Overall | 1 | 3 | 1.990518 | #####    |  |
| 55 | 2 US | 2020-14 | 4 US-Overall | 1 | 4 | 1.3152   | #####    |  |
| 56 | 2 US | 2020-14 | 4 US-Overall | 1 | 5 | #####    | #####    |  |
| 57 | 2 US | 2020-14 | 4 US-Overall | 2 | 1 | 1.017365 | #####    |  |
| 58 | 2 US | 2020-14 | 4 US-Overall | 2 | 2 | #####    | #####    |  |
| 59 | 2 US | 2020-14 | 4 US-Overall | 2 | 3 | 1.367905 | #####    |  |
| 60 | 2 US | 2020-14 | 4 US-Overall | 2 | 3 | 1.367905 | #####    |  |

|    |      |         |              |   |   |          |          |  |
|----|------|---------|--------------|---|---|----------|----------|--|
| 1  |      |         |              |   |   |          |          |  |
| 2  |      |         |              |   |   |          |          |  |
| 3  | 2 US | 2020-14 | 4 US-Overall | 2 | 4 | 1.081984 | #####    |  |
| 4  | 2 US | 2020-14 | 4 US-Overall | 2 | 5 | #####    | #####    |  |
| 5  | 2 US | 2020-14 | 4 US-Overall | 3 | 1 | 1.715006 | #####    |  |
| 6  | 2 US | 2020-14 | 4 US-Overall | 3 | 2 | #####    | #####    |  |
| 7  | 2 US | 2020-14 | 4 US-Overall | 3 | 3 | 3.006956 | #####    |  |
| 8  | 2 US | 2020-14 | 4 US-Overall | 3 | 4 | 1.657202 | #####    |  |
| 9  | 2 US | 2020-14 | 4 US-Overall | 3 | 5 | #####    | #####    |  |
| 10 | 2 US | 2020-14 | 4 US-South   | 1 | 1 | 1.361939 | #####    |  |
| 11 | 2 US | 2020-14 | 4 US-South   | 1 | 2 | #####    | #####    |  |
| 12 | 2 US | 2020-14 | 4 US-South   | 1 | 3 | 2.351985 | #####    |  |
| 13 | 2 US | 2020-14 | 4 US-South   | 1 | 4 | 1.213187 | #####    |  |
| 14 | 2 US | 2020-14 | 4 US-South   | 1 | 5 | #####    | #####    |  |
| 15 | 2 US | 2020-14 | 4 US-South   | 2 | 1 | 1.062012 | #####    |  |
| 16 | 2 US | 2020-14 | 4 US-South   | 2 | 2 | #####    | #####    |  |
| 17 | 2 US | 2020-14 | 4 US-South   | 2 | 3 | 1.544828 | #####    |  |
| 18 | 2 US | 2020-14 | 4 US-South   | 2 | 4 | #####    | #####    |  |
| 19 | 2 US | 2020-14 | 4 US-South   | 2 | 5 | #####    | #####    |  |
| 20 | 2 US | 2020-14 | 4 US-South   | 3 | 1 | 1.839493 | #####    |  |
| 21 | 2 US | 2020-14 | 4 US-South   | 3 | 2 | #####    | #####    |  |
| 22 | 2 US | 2020-14 | 4 US-South   | 3 | 3 | 3.846154 | 1.352996 |  |
| 23 | 2 US | 2020-14 | 4 US-South   | 3 | 4 | 1.554217 | #####    |  |
| 24 | 2 US | 2020-14 | 4 US-South   | 3 | 5 | #####    | #####    |  |
| 25 | 2 US | 2020-14 | 4 US-South   | 3 | 5 | #####    | #####    |  |
| 26 | 2 US | 2020-14 | 4 US-West    | 1 | 1 | 1.060628 | #####    |  |
| 27 | 2 US | 2020-14 | 4 US-West    | 1 | 2 | 1.013776 | #####    |  |
| 28 | 2 US | 2020-14 | 4 US-West    | 1 | 3 | 1.22367  | #####    |  |
| 29 | 2 US | 2020-14 | 4 US-West    | 1 | 4 | 1.333592 | #####    |  |
| 30 | 2 US | 2020-14 | 4 US-West    | 1 | 5 | #####    | #####    |  |
| 31 | 2 US | 2020-14 | 4 US-West    | 2 | 1 | #####    | #####    |  |
| 32 | 2 US | 2020-14 | 4 US-West    | 2 | 2 | #####    | #####    |  |
| 33 | 2 US | 2020-14 | 4 US-West    | 2 | 3 | #####    | #####    |  |
| 34 | 2 US | 2020-14 | 4 US-West    | 2 | 4 | 1.213333 | #####    |  |
| 35 | 2 US | 2020-14 | 4 US-West    | 2 | 5 | 0.1875   | #####    |  |
| 36 | 2 US | 2020-14 | 4 US-West    | 3 | 1 | 1.374103 | #####    |  |
| 37 | 2 US | 2020-14 | 4 US-West    | 3 | 2 | 1.5      | 1.02896  |  |
| 38 | 2 US | 2020-14 | 4 US-West    | 3 | 3 | 1.711111 | #####    |  |
| 39 | 2 US | 2020-14 | 4 US-West    | 3 | 4 | 1.4875   | #####    |  |
| 40 | 2 US | 2020-14 | 4 US-West    | 3 | 5 | #####    | #####    |  |
| 41 | 2 US | 2020-14 | 5 US-Midwes  | 1 | 1 | #####    | #####    |  |
| 42 | 2 US | 2020-14 | 5 US-Midwes  | 1 | 2 | #####    | #####    |  |
| 43 | 2 US | 2020-14 | 5 US-Midwes  | 1 | 3 | #####    | #####    |  |
| 44 | 2 US | 2020-14 | 5 US-Midwes  | 1 | 4 | #####    | #####    |  |
| 45 | 2 US | 2020-14 | 5 US-Midwes  | 1 | 5 | #####    | #####    |  |
| 46 | 2 US | 2020-14 | 5 US-Midwes  | 2 | 1 | #####    | #####    |  |
| 47 | 2 US | 2020-14 | 5 US-Midwes  | 2 | 2 | #####    | #####    |  |
| 48 | 2 US | 2020-14 | 5 US-Midwes  | 2 | 3 | #####    | #####    |  |
| 49 | 2 US | 2020-14 | 5 US-Midwes  | 2 | 4 | #####    | #####    |  |
| 50 | 2 US | 2020-14 | 5 US-Midwes  | 2 | 5 | #####    | #####    |  |
| 51 | 2 US | 2020-14 | 5 US-Midwes  | 3 | 1 | #####    | #####    |  |
| 52 | 2 US | 2020-14 | 5 US-Midwes  | 3 | 2 | #####    | #####    |  |
| 53 | 2 US | 2020-14 | 5 US-Midwes  | 3 | 3 | #####    | #####    |  |
| 54 | 2 US | 2020-14 | 5 US-Midwes  | 3 | 4 | #####    | #####    |  |
| 55 | 2 US | 2020-14 | 5 US-Midwes  | 3 | 5 | #####    | #####    |  |
| 56 | 2 US | 2020-14 | 5 US-Northe  | 1 | 1 | #####    | #####    |  |
| 57 | 2 US | 2020-14 | 5 US-Northe  | 1 | 2 | #####    | #####    |  |
| 58 | 2 US | 2020-14 | 5 US-Northe  | 1 | 3 | #####    | #####    |  |
| 59 | 2 US | 2020-14 | 5 US-Northe  | 1 | 4 | #####    | #####    |  |
| 60 | 2 US | 2020-14 | 5 US-Northe  | 1 | 4 | #####    | #####    |  |

|    |      |         |              |   |   |          |       |
|----|------|---------|--------------|---|---|----------|-------|
| 1  |      |         |              |   |   |          |       |
| 2  |      |         |              |   |   |          |       |
| 3  | 2 US | 2020-14 | 5 US-Northea | 1 | 5 | #####    | ##### |
| 4  | 2 US | 2020-14 | 5 US-Northea | 2 | 1 | #####    | ##### |
| 5  | 2 US | 2020-14 | 5 US-Northea | 2 | 2 | #####    | ##### |
| 6  | 2 US | 2020-14 | 5 US-Northea | 2 | 3 | #####    | ##### |
| 7  | 2 US | 2020-14 | 5 US-Northea | 2 | 4 | #####    | ##### |
| 8  | 2 US | 2020-14 | 5 US-Northea | 2 | 5 | #####    | ##### |
| 9  | 2 US | 2020-14 | 5 US-Northea | 3 | 1 | #####    | ##### |
| 10 | 2 US | 2020-14 | 5 US-Northea | 3 | 2 | #####    | ##### |
| 11 | 2 US | 2020-14 | 5 US-Northea | 3 | 3 | #####    | ##### |
| 12 | 2 US | 2020-14 | 5 US-Northea | 3 | 4 | 1.037037 | ##### |
| 13 | 2 US | 2020-14 | 5 US-Northea | 3 | 5 | #####    | ##### |
| 14 | 2 US | 2020-14 | 5 US-Overall | 1 | 1 | #####    | ##### |
| 15 | 2 US | 2020-14 | 5 US-Overall | 1 | 2 | #####    | ##### |
| 16 | 2 US | 2020-14 | 5 US-Overall | 1 | 3 | #####    | ##### |
| 17 | 2 US | 2020-14 | 5 US-Overall | 1 | 4 | #####    | ##### |
| 18 | 2 US | 2020-14 | 5 US-Overall | 1 | 5 | #####    | ##### |
| 19 | 2 US | 2020-14 | 5 US-Overall | 2 | 1 | #####    | ##### |
| 20 | 2 US | 2020-14 | 5 US-Overall | 2 | 2 | #####    | ##### |
| 21 | 2 US | 2020-14 | 5 US-Overall | 2 | 3 | #####    | ##### |
| 22 | 2 US | 2020-14 | 5 US-Overall | 2 | 4 | #####    | ##### |
| 23 | 2 US | 2020-14 | 5 US-Overall | 2 | 5 | #####    | ##### |
| 24 | 2 US | 2020-14 | 5 US-Overall | 2 | 5 | #####    | ##### |
| 25 | 2 US | 2020-14 | 5 US-Overall | 3 | 1 | #####    | ##### |
| 26 | 2 US | 2020-14 | 5 US-Overall | 3 | 2 | #####    | ##### |
| 27 | 2 US | 2020-14 | 5 US-Overall | 3 | 3 | #####    | ##### |
| 28 | 2 US | 2020-14 | 5 US-Overall | 3 | 4 | 1.136907 | ##### |
| 29 | 2 US | 2020-14 | 5 US-Overall | 3 | 5 | #####    | ##### |
| 30 | 2 US | 2020-14 | 5 US-South   | 1 | 1 | #####    | ##### |
| 31 | 2 US | 2020-14 | 5 US-South   | 1 | 2 | #####    | ##### |
| 32 | 2 US | 2020-14 | 5 US-South   | 1 | 3 | #####    | ##### |
| 33 | 2 US | 2020-14 | 5 US-South   | 1 | 4 | #####    | ##### |
| 34 | 2 US | 2020-14 | 5 US-South   | 1 | 5 | #####    | ##### |
| 35 | 2 US | 2020-14 | 5 US-South   | 2 | 1 | #####    | ##### |
| 36 | 2 US | 2020-14 | 5 US-South   | 2 | 2 | #####    | ##### |
| 37 | 2 US | 2020-14 | 5 US-South   | 2 | 3 | #####    | ##### |
| 38 | 2 US | 2020-14 | 5 US-South   | 2 | 4 | #####    | ##### |
| 39 | 2 US | 2020-14 | 5 US-South   | 2 | 5 | #####    | ##### |
| 40 | 2 US | 2020-14 | 5 US-South   | 3 | 1 | #####    | ##### |
| 41 | 2 US | 2020-14 | 5 US-South   | 3 | 2 | #####    | ##### |
| 42 | 2 US | 2020-14 | 5 US-South   | 3 | 3 | #####    | ##### |
| 43 | 2 US | 2020-14 | 5 US-South   | 3 | 4 | 1.141026 | ##### |
| 44 | 2 US | 2020-14 | 5 US-South   | 3 | 5 | #####    | ##### |
| 45 | 2 US | 2020-14 | 5 US-West    | 1 | 1 | 1.021987 | ##### |
| 46 | 2 US | 2020-14 | 5 US-West    | 1 | 2 | 1.189928 | ##### |
| 47 | 2 US | 2020-14 | 5 US-West    | 1 | 3 | #####    | ##### |
| 48 | 2 US | 2020-14 | 5 US-West    | 1 | 4 | 1.179779 | ##### |
| 49 | 2 US | 2020-14 | 5 US-West    | 1 | 5 | #####    | ##### |
| 50 | 2 US | 2020-14 | 5 US-West    | 2 | 1 | #####    | ##### |
| 51 | 2 US | 2020-14 | 5 US-West    | 2 | 2 | #####    | ##### |
| 52 | 2 US | 2020-14 | 5 US-West    | 2 | 3 | #####    | ##### |
| 53 | 2 US | 2020-14 | 5 US-West    | 2 | 4 | #####    | ##### |
| 54 | 2 US | 2020-14 | 5 US-West    | 2 | 5 | 0.625    | ##### |
| 55 | 2 US | 2020-14 | 5 US-West    | 3 | 1 | 1.317182 | ##### |
| 56 | 2 US | 2020-14 | 5 US-West    | 3 | 2 | 1.6      | ##### |
| 57 | 2 US | 2020-14 | 5 US-West    | 3 | 3 | 1.155556 | ##### |
| 58 | 2 US | 2020-14 | 5 US-West    | 3 | 4 | 1.532468 | ##### |
| 59 | 2 US | 2020-14 | 5 US-West    | 3 | 5 | #####    | ##### |
| 60 | 2 US | 2020-14 | 5 US-West    | 3 | 5 | #####    | ##### |

|    |      |         |              |   |   |          |          |  |
|----|------|---------|--------------|---|---|----------|----------|--|
| 1  |      |         |              |   |   |          |          |  |
| 2  |      |         |              |   |   |          |          |  |
| 3  | 2 US | 2020-15 | 1 US-Midwes  | 1 | 1 | 3.661487 | #####    |  |
| 4  | 2 US | 2020-15 | 1 US-Midwes  | 1 | 2 | 3.836167 | #####    |  |
| 5  | 2 US | 2020-15 | 1 US-Midwes  | 1 | 3 | 4.730493 | #####    |  |
| 6  | 2 US | 2020-15 | 1 US-Midwes  | 1 | 4 | 3.411544 | #####    |  |
| 7  | 2 US | 2020-15 | 1 US-Midwes  | 1 | 5 | 2.08547  | #####    |  |
| 8  | 2 US | 2020-15 | 1 US-Midwes  | 2 | 1 | 3.395975 | #####    |  |
| 9  | 2 US | 2020-15 | 1 US-Midwes  | 2 | 2 | 4.117647 | #####    |  |
| 10 | 2 US | 2020-15 | 1 US-Midwes  | 2 | 3 | 4.69697  | #####    |  |
| 11 | 2 US | 2020-15 | 1 US-Midwes  | 2 | 4 | 2.656977 | #####    |  |
| 12 | 2 US | 2020-15 | 1 US-Midwes  | 2 | 5 | 1.885714 | #####    |  |
| 13 | 2 US | 2020-15 | 1 US-Midwes  | 3 | 1 | 4.147236 | #####    |  |
| 14 | 2 US | 2020-15 | 1 US-Midwes  | 3 | 2 | 3.3      | #####    |  |
| 15 | 2 US | 2020-15 | 1 US-Midwes  | 3 | 3 | 4.793103 | 1.061058 |  |
| 16 | 2 US | 2020-15 | 1 US-Midwes  | 3 | 4 | 4.571429 | #####    |  |
| 17 | 2 US | 2020-15 | 1 US-Midwes  | 3 | 5 | 2.578947 | #####    |  |
| 18 | 2 US | 2020-15 | 1 US-Northea | 1 | 1 | 3.992858 | #####    |  |
| 19 | 2 US | 2020-15 | 1 US-Northea | 1 | 2 | 5.335411 | 1.079372 |  |
| 20 | 2 US | 2020-15 | 1 US-Northea | 1 | 3 | 4.238433 | #####    |  |
| 21 | 2 US | 2020-15 | 1 US-Northea | 1 | 4 | 4.214833 | #####    |  |
| 22 | 2 US | 2020-15 | 1 US-Northea | 1 | 5 | 2.301077 | #####    |  |
| 23 | 2 US | 2020-15 | 1 US-Northea | 2 | 1 | 4.061242 | #####    |  |
| 24 | 2 US | 2020-15 | 1 US-Northea | 2 | 2 | 4.366667 | #####    |  |
| 25 | 2 US | 2020-15 | 1 US-Northea | 2 | 3 | 4.823077 | #####    |  |
| 26 | 2 US | 2020-15 | 1 US-Northea | 2 | 4 | 4.326087 | #####    |  |
| 27 | 2 US | 2020-15 | 1 US-Northea | 2 | 5 | 2.213592 | #####    |  |
| 28 | 2 US | 2020-15 | 1 US-Northea | 3 | 1 | 3.888907 | #####    |  |
| 29 | 2 US | 2020-15 | 1 US-Northea | 3 | 2 | 6.25     | 1.944175 |  |
| 30 | 2 US | 2020-15 | 1 US-Northea | 3 | 3 | 3.352941 | #####    |  |
| 31 | 2 US | 2020-15 | 1 US-Northea | 3 | 4 | 4        | #####    |  |
| 32 | 2 US | 2020-15 | 1 US-Northea | 3 | 5 | 2.439394 | #####    |  |
| 33 | 2 US | 2020-15 | 1 US-Overall | 1 | 1 | 3.782115 | #####    |  |
| 34 | 2 US | 2020-15 | 1 US-Overall | 1 | 2 | 3.960071 | #####    |  |
| 35 | 2 US | 2020-15 | 1 US-Overall | 1 | 3 | 4.579606 | #####    |  |
| 36 | 2 US | 2020-15 | 1 US-Overall | 1 | 4 | 3.723232 | #####    |  |
| 37 | 2 US | 2020-15 | 1 US-Overall | 1 | 5 | 2.31176  | #####    |  |
| 38 | 2 US | 2020-15 | 1 US-Overall | 2 | 1 | 3.541955 | #####    |  |
| 39 | 2 US | 2020-15 | 1 US-Overall | 2 | 2 | 4.092502 | #####    |  |
| 40 | 2 US | 2020-15 | 1 US-Overall | 2 | 3 | 4.140035 | #####    |  |
| 41 | 2 US | 2020-15 | 1 US-Overall | 2 | 4 | 3.547907 | #####    |  |
| 42 | 2 US | 2020-15 | 1 US-Overall | 2 | 5 | 2.172481 | #####    |  |
| 43 | 2 US | 2020-15 | 1 US-Overall | 3 | 1 | 4.188098 | #####    |  |
| 44 | 2 US | 2020-15 | 1 US-Overall | 3 | 2 | 3.798278 | #####    |  |
| 45 | 2 US | 2020-15 | 1 US-Overall | 3 | 3 | 5.401411 | #####    |  |
| 46 | 2 US | 2020-15 | 1 US-Overall | 3 | 4 | 3.993277 | #####    |  |
| 47 | 2 US | 2020-15 | 1 US-Overall | 3 | 5 | 2.608312 | #####    |  |
| 48 | 2 US | 2020-15 | 1 US-South   | 1 | 1 | 3.870475 | #####    |  |
| 49 | 2 US | 2020-15 | 1 US-South   | 1 | 2 | 2.838469 | #####    |  |
| 50 | 2 US | 2020-15 | 1 US-South   | 1 | 3 | 5.274741 | #####    |  |
| 51 | 2 US | 2020-15 | 1 US-South   | 1 | 4 | 3.629477 | #####    |  |
| 52 | 2 US | 2020-15 | 1 US-South   | 1 | 5 | 2.226593 | #####    |  |
| 53 | 2 US | 2020-15 | 1 US-South   | 2 | 1 | 3.531329 | #####    |  |
| 54 | 2 US | 2020-15 | 1 US-South   | 2 | 2 | 3.545455 | #####    |  |
| 55 | 2 US | 2020-15 | 1 US-South   | 2 | 3 | 4.116279 | #####    |  |
| 56 | 2 US | 2020-15 | 1 US-South   | 2 | 4 | 3.722689 | #####    |  |
| 57 | 2 US | 2020-15 | 1 US-South   | 2 | 5 | 2.107438 | #####    |  |
| 58 | 2 US | 2020-15 | 1 US-South   | 3 | 1 | 4.496157 | #####    |  |
| 59 | 2 US | 2020-15 | 1 US-South   | 3 |   |          |          |  |
| 60 | 2 US | 2020-15 | 1 US-South   | 3 |   |          |          |  |

|    |      |         |              |   |   |          |          |  |
|----|------|---------|--------------|---|---|----------|----------|--|
| 1  |      |         |              |   |   |          |          |  |
| 2  |      |         |              |   |   |          |          |  |
| 3  | 2 US | 2020-15 | 1 US-South   | 3 | 2 | 2        | #####    |  |
| 4  | 2 US | 2020-15 | 1 US-South   | 3 | 3 | 8.375    | 2.186471 |  |
| 5  | 2 US | 2020-15 | 1 US-South   | 3 | 4 | 3.508197 | #####    |  |
| 6  | 2 US | 2020-15 | 1 US-South   | 3 | 5 | 2.5      | #####    |  |
| 7  | 2 US | 2020-15 | 1 US-West    | 1 | 1 | 3.562777 | #####    |  |
| 8  | 2 US | 2020-15 | 1 US-West    | 1 | 2 | 4.280315 | #####    |  |
| 9  | 2 US | 2020-15 | 1 US-West    | 1 | 3 | 3.616128 | #####    |  |
| 10 | 2 US | 2020-15 | 1 US-West    | 1 | 4 | 3.779348 | #####    |  |
| 11 | 2 US | 2020-15 | 1 US-West    | 1 | 5 | 2.616215 | #####    |  |
| 12 | 2 US | 2020-15 | 1 US-West    | 2 | 1 | 3.233468 | #####    |  |
| 13 | 2 US | 2020-15 | 1 US-West    | 2 | 2 | 4.548387 | #####    |  |
| 14 | 2 US | 2020-15 | 1 US-West    | 2 | 3 | 3.028037 | #####    |  |
| 15 | 2 US | 2020-15 | 1 US-West    | 2 | 4 | 3.485075 | #####    |  |
| 16 | 2 US | 2020-15 | 1 US-West    | 2 | 5 | 2.455172 | #####    |  |
| 17 | 2 US | 2020-15 | 1 US-West    | 3 | 1 | 4.063146 | #####    |  |
| 18 | 2 US | 2020-15 | 1 US-West    | 3 | 2 | 4        | 1.0879   |  |
| 19 | 2 US | 2020-15 | 1 US-West    | 3 | 3 | 4.393939 | #####    |  |
| 20 | 2 US | 2020-15 | 1 US-West    | 3 | 4 | 4.277778 | #####    |  |
| 21 | 2 US | 2020-15 | 1 US-West    | 3 | 5 | 2.983051 | #####    |  |
| 22 | 2 US | 2020-15 | 2 US-Midwes  | 1 | 1 | 1.6446   | #####    |  |
| 23 | 2 US | 2020-15 | 2 US-Midwes  | 1 | 2 | 1.899387 | #####    |  |
| 24 | 2 US | 2020-15 | 2 US-Midwes  | 1 | 3 | 1.911223 | #####    |  |
| 25 | 2 US | 2020-15 | 2 US-Midwes  | 1 | 4 | 1.506112 | #####    |  |
| 26 | 2 US | 2020-15 | 2 US-Midwes  | 1 | 5 | 1.178388 | #####    |  |
| 27 | 2 US | 2020-15 | 2 US-Midwes  | 2 | 1 | 1.700075 | #####    |  |
| 28 | 2 US | 2020-15 | 2 US-Midwes  | 2 | 2 | 1.85     | #####    |  |
| 29 | 2 US | 2020-15 | 2 US-Midwes  | 2 | 3 | 2.21831  | #####    |  |
| 30 | 2 US | 2020-15 | 2 US-Midwes  | 2 | 4 | 1.497238 | #####    |  |
| 31 | 2 US | 2020-15 | 2 US-Midwes  | 2 | 5 | 1.068376 | #####    |  |
| 32 | 2 US | 2020-15 | 2 US-Midwes  | 3 | 1 | 1.548602 | #####    |  |
| 33 | 2 US | 2020-15 | 2 US-Midwes  | 3 | 2 | 2        | #####    |  |
| 34 | 2 US | 2020-15 | 2 US-Midwes  | 3 | 3 | 1.4      | #####    |  |
| 35 | 2 US | 2020-15 | 2 US-Midwes  | 3 | 4 | 1.518519 | #####    |  |
| 36 | 2 US | 2020-15 | 2 US-Midwes  | 3 | 5 | 1.452381 | #####    |  |
| 37 | 2 US | 2020-15 | 2 US-Northea | 1 | 1 | 1.730874 | #####    |  |
| 38 | 2 US | 2020-15 | 2 US-Northea | 1 | 2 | 2.128263 | #####    |  |
| 39 | 2 US | 2020-15 | 2 US-Northea | 1 | 3 | 1.854109 | #####    |  |
| 40 | 2 US | 2020-15 | 2 US-Northea | 1 | 4 | 1.680746 | #####    |  |
| 41 | 2 US | 2020-15 | 2 US-Northea | 1 | 5 | 1.286692 | #####    |  |
| 42 | 2 US | 2020-15 | 2 US-Northea | 2 | 1 | 1.752427 | #####    |  |
| 43 | 2 US | 2020-15 | 2 US-Northea | 2 | 2 | 2.181818 | #####    |  |
| 44 | 2 US | 2020-15 | 2 US-Northea | 2 | 3 | 2.050725 | #####    |  |
| 45 | 2 US | 2020-15 | 2 US-Northea | 2 | 4 | 1.607595 | #####    |  |
| 46 | 2 US | 2020-15 | 2 US-Northea | 2 | 5 | 1.201923 | #####    |  |
| 47 | 2 US | 2020-15 | 2 US-Northea | 3 | 1 | 1.697938 | #####    |  |
| 48 | 2 US | 2020-15 | 2 US-Northea | 3 | 2 | 2.076923 | #####    |  |
| 49 | 2 US | 2020-15 | 2 US-Northea | 3 | 3 | 1.555556 | #####    |  |
| 50 | 2 US | 2020-15 | 2 US-Northea | 3 | 4 | 1.826923 | #####    |  |
| 51 | 2 US | 2020-15 | 2 US-Northea | 3 | 5 | 1.414286 | #####    |  |
| 52 | 2 US | 2020-15 | 2 US-Overall | 1 | 1 | 1.702986 | #####    |  |
| 53 | 2 US | 2020-15 | 2 US-Overall | 1 | 2 | 2.012405 | #####    |  |
| 54 | 2 US | 2020-15 | 2 US-Overall | 1 | 3 | 1.969078 | #####    |  |
| 55 | 2 US | 2020-15 | 2 US-Overall | 1 | 4 | 1.505982 | #####    |  |
| 56 | 2 US | 2020-15 | 2 US-Overall | 1 | 5 | 1.296899 | #####    |  |
| 57 | 2 US | 2020-15 | 2 US-Overall | 2 | 1 | 1.759883 | #####    |  |
| 58 | 2 US | 2020-15 | 2 US-Overall | 2 | 2 | 2.062786 | #####    |  |
| 59 | 2 US | 2020-15 | 2 US-Overall | 2 | 2 | 2.062786 | #####    |  |
| 60 | 2 US | 2020-15 | 2 US-Overall | 2 | 2 | 2.062786 | #####    |  |



|    |      |         |              |   |   |          |       |  |
|----|------|---------|--------------|---|---|----------|-------|--|
| 1  |      |         |              |   |   |          |       |  |
| 2  |      |         |              |   |   |          |       |  |
| 3  | 2 US | 2020-15 | 2 US-Overall | 2 | 3 | 2.122647 | ##### |  |
| 4  | 2 US | 2020-15 | 2 US-Overall | 2 | 4 | 1.546908 | ##### |  |
| 5  | 2 US | 2020-15 | 2 US-Overall | 2 | 5 | 1.242446 | ##### |  |
| 6  | 2 US | 2020-15 | 2 US-Overall | 3 | 1 | 1.611396 | ##### |  |
| 7  | 2 US | 2020-15 | 2 US-Overall | 3 | 2 | 1.95325  | ##### |  |
| 8  | 2 US | 2020-15 | 2 US-Overall | 3 | 3 | 1.69303  | ##### |  |
| 9  | 2 US | 2020-15 | 2 US-Overall | 3 | 4 | 1.4462   | ##### |  |
| 10 | 2 US | 2020-15 | 2 US-Overall | 3 | 5 | 1.407127 | ##### |  |
| 11 | 2 US | 2020-15 | 2 US-South   | 1 | 1 | 1.676751 | ##### |  |
| 12 | 2 US | 2020-15 | 2 US-South   | 1 | 2 | 1.926469 | ##### |  |
| 13 | 2 US | 2020-15 | 2 US-South   | 1 | 3 | 2.041287 | ##### |  |
| 14 | 2 US | 2020-15 | 2 US-South   | 1 | 4 | 1.401674 | ##### |  |
| 15 | 2 US | 2020-15 | 2 US-South   | 1 | 5 | 1.288684 | ##### |  |
| 16 | 2 US | 2020-15 | 2 US-South   | 2 | 1 | 1.808961 | ##### |  |
| 17 | 2 US | 2020-15 | 2 US-South   | 2 | 2 | 2.434783 | ##### |  |
| 18 | 2 US | 2020-15 | 2 US-South   | 2 | 3 | 2.166667 | ##### |  |
| 19 | 2 US | 2020-15 | 2 US-South   | 2 | 4 | 1.474074 | ##### |  |
| 20 | 2 US | 2020-15 | 2 US-South   | 2 | 5 | 1.253846 | ##### |  |
| 21 | 2 US | 2020-15 | 2 US-South   | 3 | 1 | 1.445732 | ##### |  |
| 22 | 2 US | 2020-15 | 2 US-South   | 3 | 2 | 1.375    | ##### |  |
| 23 | 2 US | 2020-15 | 2 US-South   | 3 | 3 | 1.722222 | ##### |  |
| 24 | 2 US | 2020-15 | 2 US-South   | 3 | 4 | 1.309859 | ##### |  |
| 25 | 2 US | 2020-15 | 2 US-South   | 3 | 5 | 1.363636 | ##### |  |
| 26 | 2 US | 2020-15 | 2 US-West    | 1 | 1 | 1.7709   | ##### |  |
| 27 | 2 US | 2020-15 | 2 US-West    | 1 | 2 | 2.119882 | ##### |  |
| 28 | 2 US | 2020-15 | 2 US-West    | 1 | 3 | 1.997857 | ##### |  |
| 29 | 2 US | 2020-15 | 2 US-West    | 1 | 4 | 1.527892 | ##### |  |
| 30 | 2 US | 2020-15 | 2 US-West    | 1 | 5 | 1.410678 | ##### |  |
| 31 | 2 US | 2020-15 | 2 US-West    | 2 | 1 | 1.741811 | ##### |  |
| 32 | 2 US | 2020-15 | 2 US-West    | 2 | 2 | 1.805556 | ##### |  |
| 33 | 2 US | 2020-15 | 2 US-West    | 2 | 3 | 2.016667 | ##### |  |
| 34 | 2 US | 2020-15 | 2 US-West    | 2 | 4 | 1.65493  | ##### |  |
| 35 | 2 US | 2020-15 | 2 US-West    | 2 | 5 | 1.4      | ##### |  |
| 36 | 2 US | 2020-15 | 2 US-West    | 3 | 1 | 1.811571 | ##### |  |
| 37 | 2 US | 2020-15 | 2 US-West    | 3 | 2 | 2.411765 | ##### |  |
| 38 | 2 US | 2020-15 | 2 US-West    | 3 | 3 | 1.972973 | ##### |  |
| 39 | 2 US | 2020-15 | 2 US-West    | 3 | 4 | 1.338462 | ##### |  |
| 40 | 2 US | 2020-15 | 2 US-West    | 3 | 5 | 1.432836 | ##### |  |
| 41 | 2 US | 2020-15 | 3 US-Midwes  | 1 | 1 | 0        | 0     |  |
| 42 | 2 US | 2020-15 | 3 US-Midwes  | 1 | 2 | 0        | 0     |  |
| 43 | 2 US | 2020-15 | 3 US-Midwes  | 1 | 3 | 0        | 0     |  |
| 44 | 2 US | 2020-15 | 3 US-Midwes  | 1 | 4 | 0        | 0     |  |
| 45 | 2 US | 2020-15 | 3 US-Midwes  | 1 | 5 | 0        | 0     |  |
| 46 | 2 US | 2020-15 | 3 US-Midwes  | 2 | 1 | 0        | 0     |  |
| 47 | 2 US | 2020-15 | 3 US-Midwes  | 2 | 2 | 0        | 0     |  |
| 48 | 2 US | 2020-15 | 3 US-Midwes  | 2 | 3 | 0        | 0     |  |
| 49 | 2 US | 2020-15 | 3 US-Midwes  | 2 | 4 | 0        | 0     |  |
| 50 | 2 US | 2020-15 | 3 US-Midwes  | 2 | 5 | 0        | 0     |  |
| 51 | 2 US | 2020-15 | 3 US-Midwes  | 3 | 1 | 0        | 0     |  |
| 52 | 2 US | 2020-15 | 3 US-Midwes  | 3 | 2 | 0        | 0     |  |
| 53 | 2 US | 2020-15 | 3 US-Midwes  | 3 | 3 | 0        | 0     |  |
| 54 | 2 US | 2020-15 | 3 US-Midwes  | 3 | 4 | 0        | 0     |  |
| 55 | 2 US | 2020-15 | 3 US-Midwes  | 3 | 5 | 0        | 0     |  |
| 56 | 2 US | 2020-15 | 3 US-Northe  | 1 | 1 | 0        | 0     |  |
| 57 | 2 US | 2020-15 | 3 US-Northe  | 1 | 2 | 0        | 0     |  |
| 58 | 2 US | 2020-15 | 3 US-Northe  | 1 | 3 | 0        | 0     |  |
| 59 | 2 US | 2020-15 | 3 US-Northe  | 1 | 3 | 0        | 0     |  |
| 60 | 2 US | 2020-15 | 3 US-Northe  | 1 | 3 | 0        | 0     |  |

1  
2  
3  
4  
5  
6  
7  
8  
9  
10  
11  
12  
13  
14  
15  
16  
17  
18  
19  
20  
21  
22  
23  
24  
25  
26  
27  
28  
29  
30  
31  
32  
33  
34  
35  
36  
37  
38  
39  
40  
41  
42  
43  
44  
45  
46  
47  
48  
49  
50  
51  
52  
53  
54  
55  
56  
57  
58  
59  
60

|      |         |              |   |   |   |   |
|------|---------|--------------|---|---|---|---|
| 2 US | 2020-15 | 3 US-Northe  | 1 | 4 | 0 | 0 |
| 2 US | 2020-15 | 3 US-Northe  | 1 | 5 | 0 | 0 |
| 2 US | 2020-15 | 3 US-Northe  | 2 | 1 | 0 | 0 |
| 2 US | 2020-15 | 3 US-Northe  | 2 | 2 | 0 | 0 |
| 2 US | 2020-15 | 3 US-Northe  | 2 | 3 | 0 | 0 |
| 2 US | 2020-15 | 3 US-Northe  | 2 | 4 | 0 | 0 |
| 2 US | 2020-15 | 3 US-Northe  | 2 | 5 | 0 | 0 |
| 2 US | 2020-15 | 3 US-Northe  | 3 | 1 | 0 | 0 |
| 2 US | 2020-15 | 3 US-Northe  | 3 | 2 | 0 | 0 |
| 2 US | 2020-15 | 3 US-Northe  | 3 | 3 | 0 | 0 |
| 2 US | 2020-15 | 3 US-Northe  | 3 | 4 | 0 | 0 |
| 2 US | 2020-15 | 3 US-Northe  | 3 | 5 | 0 | 0 |
| 2 US | 2020-15 | 3 US-Overall | 1 | 1 | 0 | 0 |
| 2 US | 2020-15 | 3 US-Overall | 1 | 2 | 0 | 0 |
| 2 US | 2020-15 | 3 US-Overall | 1 | 3 | 0 | 0 |
| 2 US | 2020-15 | 3 US-Overall | 1 | 4 | 0 | 0 |
| 2 US | 2020-15 | 3 US-Overall | 1 | 5 | 0 | 0 |
| 2 US | 2020-15 | 3 US-Overall | 2 | 1 | 0 | 0 |
| 2 US | 2020-15 | 3 US-Overall | 2 | 2 | 0 | 0 |
| 2 US | 2020-15 | 3 US-Overall | 2 | 3 | 0 | 0 |
| 2 US | 2020-15 | 3 US-Overall | 2 | 4 | 0 | 0 |
| 2 US | 2020-15 | 3 US-Overall | 2 | 5 | 0 | 0 |
| 2 US | 2020-15 | 3 US-Overall | 3 | 1 | 0 | 0 |
| 2 US | 2020-15 | 3 US-Overall | 3 | 2 | 0 | 0 |
| 2 US | 2020-15 | 3 US-Overall | 3 | 3 | 0 | 0 |
| 2 US | 2020-15 | 3 US-Overall | 3 | 4 | 0 | 0 |
| 2 US | 2020-15 | 3 US-Overall | 3 | 5 | 0 | 0 |
| 2 US | 2020-15 | 3 US-South   | 1 | 1 | 0 | 0 |
| 2 US | 2020-15 | 3 US-South   | 1 | 2 | 0 | 0 |
| 2 US | 2020-15 | 3 US-South   | 1 | 3 | 0 | 0 |
| 2 US | 2020-15 | 3 US-South   | 1 | 4 | 0 | 0 |
| 2 US | 2020-15 | 3 US-South   | 1 | 5 | 0 | 0 |
| 2 US | 2020-15 | 3 US-South   | 2 | 1 | 0 | 0 |
| 2 US | 2020-15 | 3 US-South   | 2 | 2 | 0 | 0 |
| 2 US | 2020-15 | 3 US-South   | 2 | 3 | 0 | 0 |
| 2 US | 2020-15 | 3 US-South   | 2 | 4 | 0 | 0 |
| 2 US | 2020-15 | 3 US-South   | 2 | 5 | 0 | 0 |
| 2 US | 2020-15 | 3 US-South   | 3 | 1 | 0 | 0 |
| 2 US | 2020-15 | 3 US-South   | 3 | 2 | 0 | 0 |
| 2 US | 2020-15 | 3 US-South   | 3 | 3 | 0 | 0 |
| 2 US | 2020-15 | 3 US-South   | 3 | 4 | 0 | 0 |
| 2 US | 2020-15 | 3 US-South   | 3 | 5 | 0 | 0 |
| 2 US | 2020-15 | 3 US-West    | 1 | 1 | 0 | 0 |
| 2 US | 2020-15 | 3 US-West    | 1 | 2 | 0 | 0 |
| 2 US | 2020-15 | 3 US-West    | 1 | 3 | 0 | 0 |
| 2 US | 2020-15 | 3 US-West    | 1 | 4 | 0 | 0 |
| 2 US | 2020-15 | 3 US-West    | 1 | 5 | 0 | 0 |
| 2 US | 2020-15 | 3 US-West    | 2 | 1 | 0 | 0 |
| 2 US | 2020-15 | 3 US-West    | 2 | 2 | 0 | 0 |
| 2 US | 2020-15 | 3 US-West    | 2 | 3 | 0 | 0 |
| 2 US | 2020-15 | 3 US-West    | 2 | 4 | 0 | 0 |
| 2 US | 2020-15 | 3 US-West    | 2 | 5 | 0 | 0 |
| 2 US | 2020-15 | 3 US-West    | 3 | 1 | 0 | 0 |
| 2 US | 2020-15 | 3 US-West    | 3 | 2 | 0 | 0 |
| 2 US | 2020-15 | 3 US-West    | 3 | 3 | 0 | 0 |
| 2 US | 2020-15 | 3 US-West    | 3 | 4 | 0 | 0 |

|    |      |         |              |   |   |          |          |  |
|----|------|---------|--------------|---|---|----------|----------|--|
| 1  |      |         |              |   |   |          |          |  |
| 2  |      |         |              |   |   |          |          |  |
| 3  | 2 US | 2020-15 | 3 US-West    | 3 | 5 | 0        | 0        |  |
| 4  | 2 US | 2020-15 | 4 US-Midwes  | 1 | 1 | 1.621502 | #####    |  |
| 5  | 2 US | 2020-15 | 4 US-Midwes  | 1 | 2 | 1.744579 | #####    |  |
| 6  | 2 US | 2020-15 | 4 US-Midwes  | 1 | 3 | 2.248482 | #####    |  |
| 7  | 2 US | 2020-15 | 4 US-Midwes  | 1 | 4 | 1.575536 | #####    |  |
| 8  | 2 US | 2020-15 | 4 US-Midwes  | 1 | 5 | #####    | #####    |  |
| 9  | 2 US | 2020-15 | 4 US-Midwes  | 2 | 1 | 1.267409 | #####    |  |
| 10 | 2 US | 2020-15 | 4 US-Midwes  | 2 | 2 | 1.983607 | #####    |  |
| 11 | 2 US | 2020-15 | 4 US-Midwes  | 2 | 3 | 1.869281 | #####    |  |
| 12 | 2 US | 2020-15 | 4 US-Midwes  | 2 | 4 | #####    | #####    |  |
| 13 | 2 US | 2020-15 | 4 US-Midwes  | 2 | 5 | #####    | #####    |  |
| 14 | 2 US | 2020-15 | 4 US-Midwes  | 3 | 1 | 2.237009 | #####    |  |
| 15 | 2 US | 2020-15 | 4 US-Midwes  | 3 | 2 | 1.2      | #####    |  |
| 16 | 2 US | 2020-15 | 4 US-Midwes  | 3 | 3 | 2.891892 | #####    |  |
| 17 | 2 US | 2020-15 | 4 US-Midwes  | 3 | 4 | 2.790698 | #####    |  |
| 18 | 2 US | 2020-15 | 4 US-Midwes  | 3 | 5 | #####    | #####    |  |
| 19 | 2 US | 2020-15 | 4 US-Northea | 1 | 1 | 1.707062 | #####    |  |
| 20 | 2 US | 2020-15 | 4 US-Northea | 1 | 2 | 2.351353 | #####    |  |
| 21 | 2 US | 2020-15 | 4 US-Northea | 1 | 3 | 1.681827 | #####    |  |
| 22 | 2 US | 2020-15 | 4 US-Northea | 1 | 4 | 2.311681 | #####    |  |
| 23 | 2 US | 2020-15 | 4 US-Northea | 1 | 5 | #####    | #####    |  |
| 24 | 2 US | 2020-15 | 4 US-Northea | 2 | 1 | 1.804037 | #####    |  |
| 25 | 2 US | 2020-15 | 4 US-Northea | 2 | 2 | 2.088235 | #####    |  |
| 26 | 2 US | 2020-15 | 4 US-Northea | 2 | 3 | 2.120805 | #####    |  |
| 27 | 2 US | 2020-15 | 4 US-Northea | 2 | 4 | 2.204969 | #####    |  |
| 28 | 2 US | 2020-15 | 4 US-Northea | 2 | 5 | #####    | #####    |  |
| 29 | 2 US | 2020-15 | 4 US-Northea | 3 | 1 | 1.56969  | #####    |  |
| 30 | 2 US | 2020-15 | 4 US-Northea | 3 | 2 | 2.5625   | 1.55873  |  |
| 31 | 2 US | 2020-15 | 4 US-Northea | 3 | 3 | 1        | #####    |  |
| 32 | 2 US | 2020-15 | 4 US-Northea | 3 | 4 | 2.5      | #####    |  |
| 33 | 2 US | 2020-15 | 4 US-Northea | 3 | 5 | #####    | 0.104447 |  |
| 34 | 2 US | 2020-15 | 4 US-Overall | 1 | 1 | 1.395454 | #####    |  |
| 35 | 2 US | 2020-15 | 4 US-Overall | 1 | 2 | 1.315371 | #####    |  |
| 36 | 2 US | 2020-15 | 4 US-Overall | 1 | 3 | 1.857909 | #####    |  |
| 37 | 2 US | 2020-15 | 4 US-Overall | 1 | 4 | 1.593185 | #####    |  |
| 38 | 2 US | 2020-15 | 4 US-Overall | 1 | 5 | #####    | #####    |  |
| 39 | 2 US | 2020-15 | 4 US-Overall | 2 | 1 | 1.127307 | #####    |  |
| 40 | 2 US | 2020-15 | 4 US-Overall | 2 | 2 | 1.577946 | #####    |  |
| 41 | 2 US | 2020-15 | 4 US-Overall | 2 | 3 | 1.294959 | #####    |  |
| 42 | 2 US | 2020-15 | 4 US-Overall | 2 | 4 | 1.319676 | #####    |  |
| 43 | 2 US | 2020-15 | 4 US-Overall | 2 | 5 | #####    | #####    |  |
| 44 | 2 US | 2020-15 | 4 US-Overall | 3 | 1 | 1.823456 | #####    |  |
| 45 | 2 US | 2020-15 | 4 US-Overall | 3 | 2 | 1.012392 | #####    |  |
| 46 | 2 US | 2020-15 | 4 US-Overall | 3 | 3 | 2.907125 | #####    |  |
| 47 | 2 US | 2020-15 | 4 US-Overall | 3 | 4 | 1.976448 | #####    |  |
| 48 | 2 US | 2020-15 | 4 US-Overall | 3 | 5 | #####    | #####    |  |
| 49 | 2 US | 2020-15 | 4 US-South   | 1 | 1 | 1.295516 | #####    |  |
| 50 | 2 US | 2020-15 | 4 US-South   | 1 | 2 | #####    | #####    |  |
| 51 | 2 US | 2020-15 | 4 US-South   | 1 | 3 | 2.262126 | #####    |  |
| 52 | 2 US | 2020-15 | 4 US-South   | 1 | 4 | 1.215855 | #####    |  |
| 53 | 2 US | 2020-15 | 4 US-South   | 1 | 5 | #####    | #####    |  |
| 54 | 2 US | 2020-15 | 4 US-South   | 2 | 1 | #####    | #####    |  |
| 55 | 2 US | 2020-15 | 4 US-South   | 2 | 2 | 0.88     | #####    |  |
| 56 | 2 US | 2020-15 | 4 US-South   | 2 | 3 | 1.081081 | #####    |  |
| 57 | 2 US | 2020-15 | 4 US-South   | 2 | 4 | 1.271429 | #####    |  |
| 58 | 2 US | 2020-15 | 4 US-South   | 2 | 5 | #####    | #####    |  |
| 59 | 2 US | 2020-15 | 4 US-South   | 2 |   |          |          |  |
| 60 | 2 US | 2020-15 | 4 US-South   | 2 |   |          |          |  |

|    |      |         |              |   |   |          |          |  |
|----|------|---------|--------------|---|---|----------|----------|--|
| 1  |      |         |              |   |   |          |          |  |
| 2  |      |         |              |   |   |          |          |  |
| 3  | 2 US | 2020-15 | 4 US-South   | 3 | 1 | 1.955737 | #####    |  |
| 4  | 2 US | 2020-15 | 4 US-South   | 3 | 2 | 0        | 0        |  |
| 5  | 2 US | 2020-15 | 4 US-South   | 3 | 3 | 5.315789 | 1.770954 |  |
| 6  | 2 US | 2020-15 | 4 US-South   | 3 | 4 | 1.146667 | #####    |  |
| 7  | 2 US | 2020-15 | 4 US-South   | 3 | 5 | #####    | #####    |  |
| 8  | 2 US | 2020-15 | 4 US-West    | 1 | 1 | 1.088777 | #####    |  |
| 9  | 2 US | 2020-15 | 4 US-West    | 1 | 2 | 1.176819 | #####    |  |
| 10 | 2 US | 2020-15 | 4 US-West    | 1 | 3 | 1.088298 | #####    |  |
| 11 | 2 US | 2020-15 | 4 US-West    | 1 | 4 | 1.601432 | #####    |  |
| 12 | 2 US | 2020-15 | 4 US-West    | 1 | 5 | #####    | #####    |  |
| 13 | 2 US | 2020-15 | 4 US-West    | 2 | 1 | #####    | #####    |  |
| 14 | 2 US | 2020-15 | 4 US-West    | 2 | 2 | 1.547619 | #####    |  |
| 15 | 2 US | 2020-15 | 4 US-West    | 2 | 3 | #####    | #####    |  |
| 16 | 2 US | 2020-15 | 4 US-West    | 2 | 4 | 1.183007 | #####    |  |
| 17 | 2 US | 2020-15 | 4 US-West    | 2 | 5 | 0.15     | #####    |  |
| 18 | 2 US | 2020-15 | 4 US-West    | 3 | 1 | 1.542855 | #####    |  |
| 19 | 2 US | 2020-15 | 4 US-West    | 3 | 2 | 0.75     | #####    |  |
| 20 | 2 US | 2020-15 | 4 US-West    | 3 | 3 | 1.897436 | #####    |  |
| 21 | 2 US | 2020-15 | 4 US-West    | 3 | 4 | 2.208333 | #####    |  |
| 22 | 2 US | 2020-15 | 4 US-West    | 3 | 5 | #####    | #####    |  |
| 23 | 2 US | 2020-15 | 5 US-Midwes  | 1 | 1 | #####    | #####    |  |
| 24 | 2 US | 2020-15 | 5 US-Midwes  | 1 | 2 | #####    | #####    |  |
| 25 | 2 US | 2020-15 | 5 US-Midwes  | 1 | 3 | #####    | #####    |  |
| 26 | 2 US | 2020-15 | 5 US-Midwes  | 1 | 4 | #####    | #####    |  |
| 27 | 2 US | 2020-15 | 5 US-Midwes  | 1 | 5 | #####    | #####    |  |
| 28 | 2 US | 2020-15 | 5 US-Midwes  | 2 | 1 | #####    | #####    |  |
| 29 | 2 US | 2020-15 | 5 US-Midwes  | 2 | 2 | #####    | #####    |  |
| 30 | 2 US | 2020-15 | 5 US-Midwes  | 2 | 3 | 0.72     | #####    |  |
| 31 | 2 US | 2020-15 | 5 US-Midwes  | 2 | 4 | #####    | #####    |  |
| 32 | 2 US | 2020-15 | 5 US-Midwes  | 2 | 5 | #####    | #####    |  |
| 33 | 2 US | 2020-15 | 5 US-Midwes  | 3 | 1 | #####    | #####    |  |
| 34 | 2 US | 2020-15 | 5 US-Midwes  | 3 | 2 | 0        | 0        |  |
| 35 | 2 US | 2020-15 | 5 US-Midwes  | 3 | 3 | #####    | #####    |  |
| 36 | 2 US | 2020-15 | 5 US-Midwes  | 3 | 4 | #####    | #####    |  |
| 37 | 2 US | 2020-15 | 5 US-Midwes  | 3 | 5 | #####    | #####    |  |
| 38 | 2 US | 2020-15 | 5 US-Midwes  | 3 | 5 | #####    | #####    |  |
| 39 | 2 US | 2020-15 | 5 US-Northea | 1 | 1 | #####    | #####    |  |
| 40 | 2 US | 2020-15 | 5 US-Northea | 1 | 2 | #####    | #####    |  |
| 41 | 2 US | 2020-15 | 5 US-Northea | 1 | 3 | #####    | #####    |  |
| 42 | 2 US | 2020-15 | 5 US-Northea | 1 | 4 | #####    | #####    |  |
| 43 | 2 US | 2020-15 | 5 US-Northea | 1 | 5 | #####    | #####    |  |
| 44 | 2 US | 2020-15 | 5 US-Northea | 2 | 1 | #####    | #####    |  |
| 45 | 2 US | 2020-15 | 5 US-Northea | 2 | 2 | #####    | #####    |  |
| 46 | 2 US | 2020-15 | 5 US-Northea | 2 | 3 | #####    | #####    |  |
| 47 | 2 US | 2020-15 | 5 US-Northea | 2 | 4 | #####    | #####    |  |
| 48 | 2 US | 2020-15 | 5 US-Northea | 2 | 5 | #####    | #####    |  |
| 49 | 2 US | 2020-15 | 5 US-Northea | 3 | 1 | #####    | #####    |  |
| 50 | 2 US | 2020-15 | 5 US-Northea | 3 | 2 | #####    | #####    |  |
| 51 | 2 US | 2020-15 | 5 US-Northea | 3 | 3 | #####    | #####    |  |
| 52 | 2 US | 2020-15 | 5 US-Northea | 3 | 4 | 1        | #####    |  |
| 53 | 2 US | 2020-15 | 5 US-Northea | 3 | 5 | 1.111111 | #####    |  |
| 54 | 2 US | 2020-15 | 5 US-Overall | 1 | 1 | #####    | #####    |  |
| 55 | 2 US | 2020-15 | 5 US-Overall | 1 | 2 | #####    | #####    |  |
| 56 | 2 US | 2020-15 | 5 US-Overall | 1 | 3 | #####    | #####    |  |
| 57 | 2 US | 2020-15 | 5 US-Overall | 1 | 4 | #####    | #####    |  |
| 58 | 2 US | 2020-15 | 5 US-Overall | 1 | 5 | #####    | #####    |  |
| 59 | 2 US | 2020-15 | 5 US-Overall | 2 | 1 | #####    | #####    |  |

|    |   |    |         |   |            |   |                  |
|----|---|----|---------|---|------------|---|------------------|
| 1  |   |    |         |   |            |   |                  |
| 2  |   |    |         |   |            |   |                  |
| 3  | 2 | US | 2020-15 | 5 | US-Overall | 2 | 2 #####          |
| 4  | 2 | US | 2020-15 | 5 | US-Overall | 2 | 3 #####          |
| 5  | 2 | US | 2020-15 | 5 | US-Overall | 2 | 4 #####          |
| 6  | 2 | US | 2020-15 | 5 | US-Overall | 2 | 5 #####          |
| 7  | 2 | US | 2020-15 | 5 | US-Overall | 3 | 1 #####          |
| 8  | 2 | US | 2020-15 | 5 | US-Overall | 3 | 2 #####          |
| 9  | 2 | US | 2020-15 | 5 | US-Overall | 3 | 3 #####          |
| 10 | 2 | US | 2020-15 | 5 | US-Overall | 3 | 4 1.053095 ##### |
| 11 | 2 | US | 2020-15 | 5 | US-Overall | 3 | 5 1.00127 #####  |
| 12 | 2 | US | 2020-15 | 5 | US-South   | 1 | 1 #####          |
| 13 | 2 | US | 2020-15 | 5 | US-South   | 1 | 2 #####          |
| 14 | 2 | US | 2020-15 | 5 | US-South   | 1 | 3 #####          |
| 15 | 2 | US | 2020-15 | 5 | US-South   | 1 | 4 1.082793 ##### |
| 16 | 2 | US | 2020-15 | 5 | US-South   | 1 | 5 #####          |
| 17 | 2 | US | 2020-15 | 5 | US-South   | 2 | 1 #####          |
| 18 | 2 | US | 2020-15 | 5 | US-South   | 2 | 2 #####          |
| 19 | 2 | US | 2020-15 | 5 | US-South   | 2 | 3 #####          |
| 20 | 2 | US | 2020-15 | 5 | US-South   | 2 | 4 #####          |
| 21 | 2 | US | 2020-15 | 5 | US-South   | 2 | 5 #####          |
| 22 | 2 | US | 2020-15 | 5 | US-South   | 3 | 1 #####          |
| 23 | 2 | US | 2020-15 | 5 | US-South   | 3 | 2 #####          |
| 24 | 2 | US | 2020-15 | 5 | US-South   | 3 | 3 #####          |
| 25 | 2 | US | 2020-15 | 5 | US-South   | 3 | 4 1.202899 ##### |
| 26 | 2 | US | 2020-15 | 5 | US-South   | 3 | 5 #####          |
| 27 | 2 | US | 2020-15 | 5 | US-South   | 3 | #####            |
| 28 | 2 | US | 2020-15 | 5 | US-West    | 1 | 1 #####          |
| 29 | 2 | US | 2020-15 | 5 | US-West    | 1 | 2 #####          |
| 30 | 2 | US | 2020-15 | 5 | US-West    | 1 | 3 #####          |
| 31 | 2 | US | 2020-15 | 5 | US-West    | 1 | 4 #####          |
| 32 | 2 | US | 2020-15 | 5 | US-West    | 1 | 5 #####          |
| 33 | 2 | US | 2020-15 | 5 | US-West    | 2 | 1 #####          |
| 34 | 2 | US | 2020-15 | 5 | US-West    | 2 | 2 1.025641 ##### |
| 35 | 2 | US | 2020-15 | 5 | US-West    | 2 | 3 #####          |
| 36 | 2 | US | 2020-15 | 5 | US-West    | 2 | 4 #####          |
| 37 | 2 | US | 2020-15 | 5 | US-West    | 2 | 5 #####          |
| 38 | 2 | US | 2020-15 | 5 | US-West    | 3 | 1 1.004452 ##### |
| 39 | 2 | US | 2020-15 | 5 | US-West    | 3 | 2 #####          |
| 40 | 2 | US | 2020-15 | 5 | US-West    | 3 | 3 1.128205 ##### |
| 41 | 2 | US | 2020-15 | 5 | US-West    | 3 | 4 1.096774 ##### |
| 42 | 2 | US | 2020-15 | 5 | US-West    | 3 | 5 1.047619 ##### |
| 43 |   |    |         |   |            |   |                  |
| 44 |   |    |         |   |            |   |                  |
| 45 |   |    |         |   |            |   |                  |
| 46 |   |    |         |   |            |   |                  |
| 47 |   |    |         |   |            |   |                  |
| 48 |   |    |         |   |            |   |                  |
| 49 |   |    |         |   |            |   |                  |
| 50 |   |    |         |   |            |   |                  |
| 51 |   |    |         |   |            |   |                  |
| 52 |   |    |         |   |            |   |                  |
| 53 |   |    |         |   |            |   |                  |
| 54 |   |    |         |   |            |   |                  |
| 55 |   |    |         |   |            |   |                  |
| 56 |   |    |         |   |            |   |                  |
| 57 |   |    |         |   |            |   |                  |
| 58 |   |    |         |   |            |   |                  |
| 59 |   |    |         |   |            |   |                  |
| 60 |   |    |         |   |            |   |                  |

1  
2  
3  
4  
5  
6  
7  
8  
9  
10  
11  
12  
13  
14  
15  
16  
17  
18  
19  
20  
21  
22  
23  
24  
25  
26  
27  
28  
29  
30  
31  
32  
33  
34  
35  
36  
37  
38  
39  
40  
41  
42  
43  
44  
45  
46  
47  
48  
49  
50  
51  
52  
53  
54  
55  
56  
57  
58  
59  
60

e

For peer review only

|    | <b>variable name</b> | <b>variable type</b> | <b>description</b>                                    |
|----|----------------------|----------------------|-------------------------------------------------------|
| 1  |                      |                      |                                                       |
| 2  |                      |                      |                                                       |
| 3  | threshold            | integer              | threshold used to cap the contact numbers in each     |
| 4  |                      |                      | setting                                               |
| 5  |                      |                      |                                                       |
| 6  | country              | character            | surveyed country                                      |
| 7  |                      |                      |                                                       |
| 8  |                      |                      |                                                       |
| 9  | region               | character            | subnational region of residence                       |
| 10 |                      |                      |                                                       |
| 11 |                      |                      |                                                       |
| 12 | week                 | character            | calendar week including the day to which contact data |
| 13 |                      |                      | refer to                                              |
| 14 | setting              | integer              | setting of the reported contacts                      |
| 15 |                      |                      |                                                       |
| 16 | sex                  | integer              |                                                       |
| 17 | age                  | integer              |                                                       |
| 18 |                      |                      |                                                       |
| 19 | contacts             | double               |                                                       |
| 20 |                      |                      |                                                       |
| 21 | contacts_se          | double               |                                                       |
| 22 |                      |                      |                                                       |
| 23 |                      |                      |                                                       |
| 24 |                      |                      |                                                       |
| 25 |                      |                      |                                                       |
| 26 |                      |                      |                                                       |
| 27 |                      |                      |                                                       |
| 28 |                      |                      |                                                       |
| 29 |                      |                      |                                                       |
| 30 |                      |                      |                                                       |
| 31 |                      |                      |                                                       |
| 32 |                      |                      |                                                       |
| 33 |                      |                      |                                                       |
| 34 |                      |                      |                                                       |
| 35 |                      |                      |                                                       |
| 36 |                      |                      |                                                       |
| 37 |                      |                      |                                                       |
| 38 |                      |                      |                                                       |
| 39 |                      |                      |                                                       |
| 40 |                      |                      |                                                       |
| 41 |                      |                      |                                                       |
| 42 |                      |                      |                                                       |
| 43 |                      |                      |                                                       |
| 44 |                      |                      |                                                       |
| 45 |                      |                      |                                                       |
| 46 |                      |                      |                                                       |
| 47 |                      |                      |                                                       |
| 48 |                      |                      |                                                       |
| 49 |                      |                      |                                                       |
| 50 |                      |                      |                                                       |
| 51 |                      |                      |                                                       |
| 52 |                      |                      |                                                       |
| 53 |                      |                      |                                                       |
| 54 |                      |                      |                                                       |
| 55 |                      |                      |                                                       |
| 56 |                      |                      |                                                       |
| 57 |                      |                      |                                                       |
| 58 |                      |                      |                                                       |
| 59 |                      |                      |                                                       |
| 60 |                      |                      |                                                       |

**notes**

1=fixed cut-off point at 29 contacts; 2=90% quantile of the contact distribution for the respective setting

BE=Belgium, DE=Germany, ES=Spain, FR=France, IT=Italy, NL=Netherlands, UK=United Kingdom, US=United States expressed in the form "country code-region", while "country-Overall" stands for the whole country expressed in the form "year-week number"

1=overall, 2=home, 3=school, 4=work, 5=general community

1=overall, 2=female, 3=male

1=overall, 2=18-24 years, 3=25-44 years, 4=45-64 years, 5=65 years or more

weighted mean number of contacts (using post-stratification weights)

standard error (SE)



# BMJ Open

**The differential impact of physical distancing strategies on social contacts relevant for the spread of SARS-CoV-2: Evidence from a cross-national online survey, March – April 2020**

|                                 |                                                                                                                                                                                                                                                                                                                                                                                                                                         |
|---------------------------------|-----------------------------------------------------------------------------------------------------------------------------------------------------------------------------------------------------------------------------------------------------------------------------------------------------------------------------------------------------------------------------------------------------------------------------------------|
| Journal:                        | <i>BMJ Open</i>                                                                                                                                                                                                                                                                                                                                                                                                                         |
| Manuscript ID                   | bmjopen-2021-050651.R1                                                                                                                                                                                                                                                                                                                                                                                                                  |
| Article Type:                   | Original research                                                                                                                                                                                                                                                                                                                                                                                                                       |
| Date Submitted by the Author:   | 11-Aug-2021                                                                                                                                                                                                                                                                                                                                                                                                                             |
| Complete List of Authors:       | Del Fava, Emanuele; Max-Planck-Institute for Demographic Research Cimentada, Jorge; Max-Planck-Institute for Demographic Research Perrotta, Daniela; Max-Planck-Institute for Demographic Research Grow, André; Max-Planck-Institute for Demographic Research Rampazzo, Francesco; University of Oxford Gil-Clavel, Sofia; Max-Planck-Institute for Demographic Research Zagheni, Emilio; Max-Planck-Institute for Demographic Research |
| <b>Primary Subject Heading</b>: | Epidemiology                                                                                                                                                                                                                                                                                                                                                                                                                            |
| Secondary Subject Heading:      | Infectious diseases, Public health, Sociology                                                                                                                                                                                                                                                                                                                                                                                           |
| Keywords:                       | COVID-19, World Wide Web technology < BIOTECHNOLOGY & BIOINFORMATICS, Public health < INFECTIOUS DISEASES, Epidemiology < INFECTIOUS DISEASES                                                                                                                                                                                                                                                                                           |
|                                 |                                                                                                                                                                                                                                                                                                                                                                                                                                         |

SCHOLARONE™  
Manuscripts



I, the Submitting Author has the right to grant and does grant on behalf of all authors of the Work (as defined in the below author licence), an exclusive licence and/or a non-exclusive licence for contributions from authors who are: i) UK Crown employees; ii) where BMJ has agreed a CC-BY licence shall apply, and/or iii) in accordance with the terms applicable for US Federal Government officers or employees acting as part of their official duties; on a worldwide, perpetual, irrevocable, royalty-free basis to BMJ Publishing Group Ltd ("BMJ") its licensees and where the relevant Journal is co-owned by BMJ to the co-owners of the Journal, to publish the Work in this journal and any other BMJ products and to exploit all rights, as set out in our [licence](#).

The Submitting Author accepts and understands that any supply made under these terms is made by BMJ to the Submitting Author unless you are acting as an employee on behalf of your employer or a postgraduate student of an affiliated institution which is paying any applicable article publishing charge ("APC") for Open Access articles. Where the Submitting Author wishes to make the Work available on an Open Access basis (and intends to pay the relevant APC), the terms of reuse of such Open Access shall be governed by a Creative Commons licence – details of these licences and which [Creative Commons](#) licence will apply to this Work are set out in our licence referred to above.

Other than as permitted in any relevant BMJ Author's Self Archiving Policies, I confirm this Work has not been accepted for publication elsewhere, is not being considered for publication elsewhere and does not duplicate material already published. I confirm all authors consent to publication of this Work and authorise the granting of this licence.

1  
2  
3 1 **The differential impact of physical distancing strategies on social contacts relevant for the spread of**  
4  
5 2 **SARS-CoV-2: Evidence from a cross-national online survey, March – April 2020**  
6

7  
8 3  
9 4 Emanuele Del Fava<sup>1</sup>, Jorge Cimentada<sup>1</sup>, Daniela Perrotta<sup>1</sup>, André Grow<sup>1</sup>, Francesco Rampazzo<sup>2</sup>, Sofia  
10 5 Gil-Clavel<sup>1</sup>, Emilio Zagheni<sup>1</sup>  
11  
12 6

13  
14  
15 7 <sup>1</sup> Max Planck Institute for Demographic Research, Rostock, Germany.

16 8 <sup>2</sup> Saïd Business School, Leverhulme Centre for Demographic Science, and Nuffield College, University  
17 9 of Oxford, Oxford, United Kingdom.  
18  
19  
20  
21

22 10  
23  
24 11 **Corresponding author**

25  
26 12 Emanuele Del Fava, Max Planck Institute for Demographic Research, Konrad-Zuse-Str. 6, 18057 Rostock  
27 13 (Germany), email: [delfava@demogr.mpg.de](mailto:delfava@demogr.mpg.de)  
28  
29  
30  
31  
32  
33  
34  
35  
36  
37  
38  
39  
40  
41  
42  
43  
44  
45  
46  
47  
48  
49  
50  
51  
52  
53  
54  
55  
56  
57  
58  
59  
60

1  
2  
3 14 **ABSTRACT**  
4

5 15 **Objectives:** We investigate changes in social contact patterns following the gradual introduction of non-  
6  
7 16 pharmaceutical interventions and their implications for infection transmission in the early phase of the  
8  
9 17 pandemic.

11 18 **Design, setting, and participants:** We conducted an online survey based on targeted Facebook  
12  
13 19 advertising campaigns across eight countries (Belgium, France, Germany, Italy, the Netherlands, Spain,  
14  
15 20 the United Kingdom, and the United States), achieving a sample of 51,233 questionnaires in the period  
16  
17 21 March 13–April 12, 2020. Post-stratification weights based on census information were produced to  
18  
19 22 correct for selection bias.

22 23 **Outcome measures:** Participants provided data on social contact numbers, adoption of protective  
23  
24 24 behaviours, and perceived level of threat. These data were combined to derive a weekly index of infection  
25  
26 25 transmission, the net reproduction number  $R_t$ .

28 26 **Results:** Evidence from the US and UK showed that the number of daily contacts mainly decreased after  
29  
30 27 governments issued the first physical distancing guidelines. In mid-April, daily social contact numbers had  
31  
32 28 decreased between 61% in Germany and 87% in Italy with respect to pre-COVID levels, mostly due to a  
33  
34 29 contraction in contacts outside the home. Such reductions, which were uniform across age groups, were  
35  
36 30 compatible with an  $R_t$  equal or smaller than one in all countries, except Germany. This indicates lower  
37  
38 31 levels of infection transmission, especially in a period of gradual increase in the adoption rate of the face  
39  
40 32 mask outside the home.

43 33 **Conclusions:** We provided a comparable set of statistics on social contact patterns during the COVID-19  
44  
45 34 pandemic for eight high-income countries, disaggregated by week and other demographic factors, which  
46  
47 35 could be leveraged by the scientific community for developing more realistic epidemic models of  
48  
49 36 COVID-19.  
50  
51  
52  
53  
54  
55  
56  
57

### 37 **Strengths and limitations of this study**

- 38 • The use of targeted Facebook advertisements to rapidly recruit survey respondents made it  
39 possible to collect data on health behaviours in a timely manner and at a lower cost than expected  
40 with traditional surveys during public health emergencies.
- 41 • The use of the same survey instrument in a cross-country perspective enabled us to collect daily  
42 data on social contact numbers and adoption of protective behaviours in a consistent manner in  
43 different epidemic contexts.
- 44 • The stratification of the Facebook advertising campaigns by sex, age group and region of  
45 residence, along with the construction of poststratification weights based on the population  
46 census data of the same variables, helped to reduce the non-representativeness bias in participant  
47 recruitment.
- 48 • Despite the use of poststratification weights, we could not entirely adjust for different behaviours  
49 or social inequalities among Facebook users, since only a limited number of demographic  
50 variables could be included in the ads stratification.
- 51 • Although data on the characteristics of social contacts (e.g., their age) were not collected, we  
52 proposed a method to derive age-specific contact matrices using predictions of the number of  
53 social contacts by age group and estimate the net reproduction number  $R_t$ .

## 54 INTRODUCTION

55 The coronavirus disease 2019 (COVID-19) epidemic has shown the importance of implementing non-  
56 pharmaceutical interventions (NPIs), like physical distancing, to contain the spread of infectious diseases  
57 and to avoid over-burdening health care systems. As the strain of the virus that causes the disease (SARS-  
58 CoV-2) spreads from person to person through infected secretions, like saliva or respiratory droplets from  
59 the nose or mouth, disease transmission mainly occurs via close social contacts, generally when  
60 susceptible individuals breathe in droplets from infected ones, although there is increasing evidence for  
61 airborne transmission through aerosols [1].

62 In the early phase of the pandemic, in the absence of a vaccine and effective antiviral treatments,  
63 the public health measures introduced to contain the disease were largely NPIs aimed at reducing the  
64 number of social contacts, e.g., travel restrictions, school closures, the cancellation of large gatherings, the  
65 promotion of physical distancing practices, and, in some countries, nationwide lockdowns. Quantifying  
66 changes in social contact patterns in response to these interventions is key to (i) improve our understanding  
67 of the determinants of disease transmission, (ii) enable researchers to design more realistic epidemic  
68 models, and, ultimately, (iii) assess the effectiveness of public health measures designed to contain the  
69 disease and prevent new waves of infection [2,3].

70 In this study, we leverage new opportunities for data collection, enabled by the digitalization of  
71 our lives, to assess changes in social contact patterns across countries and over time, and to examine their  
72 implications for the spread of SARS-CoV-2. We estimate the net reproduction number,  $R_t$ , an index that  
73 directly depends on social contact patterns. This is based on a cross-national online survey, the COVID-  
74 19 Health Behaviour Survey (CHBS), for which we recruited participants via targeted Facebook  
75 advertisements stratified by sex, age, and region of residence, during the early phase of the pandemic  
76 [4,5]. One goal of the survey was to evaluate the extent to which social contact numbers changed across  
77 countries and over time, especially in comparison with those observed prior to the pandemic, using  
78 comparable metrics [3,6]. Following the literature on the relationship between social contacts and their  
79 impact on the reproduction number for close-contact infectious diseases [2,7,8], and consistently with

1  
2  
3 80 other social contact surveys conducted in Asia [9], Europe [10–14], Africa [15], and North America  
4  
5 81 [16,17] to assess changes in contact patterns and their impact on infection transmission during the early  
6  
7 82 phase of the pandemic, we quantified participants' social contacts, adoption of protective behaviour, and  
8  
9 83 perceived threat, and estimated the relative impact of changes in social contact numbers on the net  
10  
11 84 reproduction rate  $R_t$ , taking also the effect of other behavioural changes into account.  
12  
13  
14 85

## 15 86 **METHODS**

### 17 87 **Study design**

18  
19  
20 88 We designed the CHBS as a cross-country, cross-sectional, and voluntary opt-in online survey to collect  
21  
22 89 key information on people's health and behaviour in eight high-income countries – Belgium, France,  
23  
24 90 Germany, Italy, the Netherlands, Spain, the United Kingdom (UK), and the United States (US). The first  
25  
26 91 wave of data collection ran from March 13 to April 12, 2020, a key period during which the global  
27  
28 92 pandemic was well underway, even though at different stages across countries [4]. To quickly reach large  
29  
30 93 numbers of survey participants across several countries, recruitment occurred via targeted advertisements  
31  
32 94 implemented through the Facebook Ads Manager, a tool usually employed by advertisers to create  
33  
34 95 marketing campaigns for their products. The ads were stratified by sex, age group, and region of  
35  
36 96 residence, in order to ensure that a minimum number of respondents could be reached in each stratum  
37  
38 97 [18,19]. Post-stratification weights by sex, age group, and region of residence were used in all analyses.  
39  
40 98 These were obtained by dividing the true population proportion in each stratum (based on nationally  
41  
42 99 representative census data [20,21]) by the sample proportion from the same stratum. The effect of  
43  
44 100 applying these weights to the sample is shown in the Supplementary Tables S1-S8. Ethical approval for  
45  
46 101 the study was obtained from the Ethics Council of the Max Planck Society. Participation was anonymous,  
47  
48 102 voluntary, and open to people aged 18 or older who gave their informed consent. This study was funded  
49  
50 103 with support from the Max Planck Institute for Demographic Research, which is part of the Max Planck  
51  
52 104 Society.  
53  
54  
55  
56  
57  
58  
59  
60

1  
2  
3 105 We asked respondents to report the number of social contacts (defined as any interaction  
4  
5 106 involving either physical contact or a conversation of three or more words in the physical presence of  
6  
7 107 another person) on the day prior to the survey in four different settings, i.e., at home, at school, at work,  
8  
9 108 and in the general community (e.g., during commuting or leisure activities) (Supplementary Fig. S1). We  
10  
11 109 calculated the overall number of daily contacts per person as the sum of contacts in the four settings, after  
12  
13 110 removing participants who reported more contacts than the 90% quantile of the contact distribution for  
14  
15 111 the respective setting. This choice was motivated by the need to remove low-quality responses with  
16  
17 112 implausibly high contact numbers. Our results were robust to the choice of the threshold, as we also  
18  
19 113 considered a fixed cut-off point equal to 29 contacts, which has been used in a seminal social contact  
20  
21 114 study [3] and which resulted in slightly higher average contact numbers (Supplementary Tables S9-S16).  
22  
23 115 We also asked participants to report, among others, their perceived level of threat (Q13: “What level of  
24  
25 116 threat do you think the coronavirus poses to... you personally? ... your family?”) and their adoption of  
26  
27 117 any protective behaviours that might have an impact on disease transmissibility [22] (Q18: “Which of the  
28  
29 118 following actions, if any, have you already taken to protect yourself from the coronavirus?... washed  
30  
31 119 hands more often?... worn a face mask?... avoided social activities (e.g., meeting friends)?”).  
32  
33  
34  
35  
36

### 37 121 **Data analysis**

38  
39 122 We modelled the number of daily contacts reported by participants using negative binomial regression to  
40  
41 123 account for possible over-dispersion in the contact data [23]. The models were fitted independently by  
42  
43 124 country, setting of contact, and contact threshold, and adjusted for both socio-demographic characteristics  
44  
45 125 and behavioural responses of respondents. The first group accounted for sex, age group, region of  
46  
47 126 residence, education level, working status, household (HH) size (continuous and centred around the  
48  
49 127 mean), day type (whether weekday or weekend), and being foreign-born. The second group included a  
50  
51 128 dummy variable for each protective behaviour and a threat perception index, built by averaging the threat  
52  
53 129 to oneself (much higher for older adults than for the 18-24 group [4]) and to the family. For each fitted  
54  
55  
56  
57  
58  
59  
60



1  
2  
3 130 model, we predicted the mean number of contacts, overall and by age group, adjusted at the mean values  
4  
5 131 of the three behavioural variables and the feeling of threat.

6  
7 132 Next, we assessed the implications of the changes in social contact numbers for the net  
8  
9 133 reproduction number ( $R_t$ , i.e., the average number of new infections generated by an infectious person at  
10  
11 134 time  $t$  in a population, either partially or fully susceptible, considering the current interventions and the  
12  
13 135 potential spontaneous behavioural change in response to the risk of infection [24,25]), estimated as the  
14  
15 136 dominant eigenvalue of the next generation matrix  $\mathbf{N}$ , which provides information on the numbers of  
16  
17 137 newly infected individuals by age group at a given time [26]. Under the “social contact hypothesis”  
18  
19 138 [2,27], we have the relationship  $\mathbf{N} = Dq\mathbf{C}$ , where  $\mathbf{C}$  denotes the matrix containing the average number of  
20  
21 139 contacts between age groups,  $q$  is the infection transmissibility, and  $D$  is the length of the infectious  
22  
23 140 period. We used the proportional relationship between  $\mathbf{N}$  and  $\mathbf{C}$ , i.e.,  $\mathbf{N} = \frac{R_t}{\rho(\mathbf{C})}\mathbf{C}$ , where  $\rho(\mathbf{C})$  denotes the  
24  
25 141 dominant eigenvalue of  $\mathbf{C}$ , to assess changes in  $R_t$  due to changes in social contact numbers [11,14,17].  
26  
27 142 We compared our contact data with those collected prior to the epidemic, either from the POLYMOD  
28  
29 143 study (Belgium, Germany, Italy, the Netherlands, and the UK) [3], or from the Comes-F study (France)  
30  
31 144 [6], and we derived age-specific social contact matrices  $\mathbf{C}$  compatible with the demographic structure of  
32  
33 145 each country at the beginning of 2020 [28].  
34  
35  
36  
37

38 146 We assumed that (i) the basic reproduction number  $R_0$  of the infection was consistent with social  
39  
40 147 mixing as measured prior to COVID-19, under the assumption of absence of immunity in the population  
41  
42 148 and of any behavioural change and interventions; (ii) the parameters  $D$  and  $q$  did not change over time;  
43  
44 149 (iii) the initial contact matrices of Italy and the UK could be a reasonable replacement of contact patterns  
45  
46 150 of Spain and the US, because of cultural similarity, after projecting them on the respective demographic  
47  
48 151 structures.

49  
50  
51 152 We obtained weekly contact matrices  $\mathbf{C}_w^{cov}$  by multiplying the normalised pre-COVID contact  
52  
53 153 matrices  $\mathbf{C}^{pre}$  with the predicted contact numbers by age group and week (see more details on matrix  
54  
55 154 construction in the Supplementary Material). We finally computed the weekly values of  $R_t^w$  as  $R_0 f_R^w$ ,  
56  
57  
58  
59  
60

155 where the weekly reduction factor  $f_R^w$  was given by the ratio between the dominant eigenvalue of the  
156 weekly contact matrix and that of the pre-COVID matrix, i.e.,  $f_R^w = \rho(\mathbf{C}_w^{cov})/\rho(\mathbf{C}^{pre})$ .

157 Our estimates of  $R_t^w$  accounted for three sources of uncertainty, namely, (i) the baseline basic  
158 reproduction number  $R_0$ , which, according to a meta-analysis of the literature, was assumed to be  
159 normally distributed with mean 2.6 and standard deviation 0.54, resulting in the 95% confidence interval  
160 (CI) (1.54, 3.66) [14,17]; (ii) the weekly predictions of the daily overall number of contacts, assumed to  
161 be normally distributed with mean and standard deviation coming from our predictions; (iii) the pre-  
162 COVID contact matrices, which were derived by applying nonparametric bootstrap to the original data.  
163 For each source of uncertainty, 5,000 replicates were taken.

164 All data preparation and visualization were performed in R software [29], while the negative  
165 binomial regression models were fitted in Stata 16.

### 167 Patient and public involvement

168 Respondents were not involved in the design of the study. However, as the survey was disseminated  
169 through Facebook ads, users could comment on the ads, leave posts on the study page, and review the  
170 page itself. To maintain trust with both current and prospective participants, we engaged with user  
171 comments and provided additional information if requested [5].

## 173 RESULTS

174 From an initial sample of 60,048 respondents, we obtained a final sample of 51,233 individuals who (i)  
175 completed the questionnaire between March 13 and April 12, 2020, (ii) provided the information on sex,  
176 age group, and region of residence, necessary for the computation of the post-stratification weights, and  
177 (iii) reported knowing at least something about the coronavirus outbreak at the time of their participation.

178 Individual social contacts decreased during the study period in all surveyed countries, plateauing  
179 at the lowest levels between calendar week 2020-13 (March 23 – 29) and calendar week 2020-14 (March

1  
2  
3 180 30 – April 5) under both contact number thresholds (Fig. 1 and Supplementary Fig. S2). The decrease was  
4  
5 181 such that around 30% of participants in each country reported having less than one contact per day during  
6  
7 182 the study period (Supplementary Fig. S3).

9 183 Results for the US and the UK showed that the overall numbers of daily social contacts declined  
10  
11 184 considerably after governments issued physical distancing guidelines, mainly occurring during week  
12  
13 185 2020-11 (March 9 – 15), rather than after more stringent lockdown measures were announced. Comparing  
14  
15 186 trends before and after the announcement of physical distancing measures, both occurring between week  
16  
17 187 2020-11 and week 2020-12 [30,31], we estimated that, under the 90% quantile threshold, the average  
18  
19 188 number of daily contacts decreased from 3.67 (8.81 under the  $\leq 29$  threshold) in week 2020-11 to 2.82  
20  
21 189 (4.81) in week 2020-13 in the US, and from 3.43 (8.77) to 2.40 (3.85) in the UK. Then, in week 2020-14,  
22  
23 190 after the implementation of lockdown measures, contact numbers decreased even further in the UK – to  
24  
25 191 2.17 (3.07) – and to a smaller extent in the US – to 2.67 (4.42) –, where contact numbers had essentially  
26  
27 192 plateaued since the beginning of week 2020-13 (Table 1 and Supplementary Table S17). Also in the other  
28  
29 193 countries, where physical distancing guidelines were introduced before the beginning of our study, we  
30  
31 194 found that the average number of contacts had declined to their lowest levels in week 2020-14, ranging  
32  
33 195 from 2.94 and 2.97 in Germany and the Netherlands, respectively, to 1.93 and 2.17 in France and Italy,  
34  
35 196 respectively (Table 1). These results show how reductions in social contacts differed between those  
36  
37 197 countries that eventually applied a full lockdown (people were required to stay at home and not allowed  
38  
39 198 to go out if not necessary), such as Belgium, France, Italy, Spain, and the UK, and those that opted for a  
40  
41 199 partial lockdown (a stricter version of the physical distancing guidelines was imposed, but people had the  
42  
43 200 freedom to go out), such as Germany and the Netherlands.

44  
45 201 The comparison between the pre-pandemic contact data and those in week 2020-15 showed that  
46  
47 202 the largest reduction occurred in Italy, at 87% under the 90% quantile threshold (81% under the  $\leq 29$   
48  
49 203 threshold), though substantial declines also occurred in the other countries, ranging from 61% (32%) in  
50  
51 204 Germany to between 78% and 82% (63% and 70%) in Belgium, France, the Netherlands, and the UK.  
52  
53 205 This variation was mostly due to a decrease of contact numbers in the general community and, to a lower  
54  
55  
56  
57  
58  
59  
60

1  
2  
3 206 extent, at work. Indeed, while the former setting was the main contributor to the overall number of daily  
4  
5 207 contacts in the pre-COVID-19 period, at the end of the study period (week 2020-15) and under the 90%  
6  
7 208 quantile threshold, home contacts had become the largest component, representing up to 50% (in  
8  
9 209 Germany and the Netherlands) and around 70% (in Italy, Spain, and the UK) of all the contacts  
10  
11 210 (Supplementary Fig. S4); this result was slightly attenuated under the  $\leq 29$  threshold, as in Germany and  
12  
13 211 the Netherlands, both the work and the general community represented more important contributors than  
14  
15 212 the household (Supplementary Fig. S5), likely due to the smaller average household size in these two  
16  
17 213 countries (Supplementary Fig. S6).

18  
19  
20 214 The analysis of the determinants of the contact numbers showed a pattern of cross-country  
21  
22 215 heterogeneity, with a dependence on socio-demographic variables such as the household size and being in  
23  
24 216 paid work – all positively associated – and, to a lower extent, being male, and reporting data during the  
25  
26 217 weekend (Supplementary Figs. S7 and S8). In terms of behavioural factors, at the introduction of the  
27  
28 218 physical distancing guidelines in week 2020-11 followed an increase in the rate of adoption of protective  
29  
30 219 behaviour, especially wearing a face mask and avoiding social activities (Fig. 2). This is particularly  
31  
32 220 evident in the UK, the US, and Germany, where we included participants in a period of increasing  
33  
34 221 restrictions. What strikes the most is the increased use of face coverings in all countries, except for  
35  
36 222 Belgium and the Netherlands (stable at 10%) [4]. The largest increases were reported in Italy (from 40%  
37  
38 223 in week 2020-11 to 80% in week 2020-15) and in the US (from 10% in week 2020-11 to 60% in week  
39  
40 224 2020-15), while in the UK it reached 20% by the same date. Between 80% and 90% of participants in  
41  
42 225 every country avoided social activities, with evidence of a sharp increase over time during between week  
43  
44 226 2020-11 and week 2020-13 in the UK and, to a lesser extent, the US. Little to no variation was instead  
45  
46 227 observed for handwashing and the perceived threat. As concerns the association between these other  
47  
48 228 health behaviours and the contact numbers, both avoiding social activities and the feeling of threat were  
49  
50 229 generally associated with a lower number of contacts, while wearing a face mask was often positively  
51  
52 230 associated (Supplementary Fig. S7). Age-specific contact numbers over time were quite heterogenous  
53  
54 231 across settings. In general, people aged 18-24 reported higher contact numbers at home (representing the  
55  
56  
57  
58  
59  
60

1  
2  
3 232 main source of contacts), while people aged 45-64 and older adults reported higher contacts in the general  
4  
5 233 community (Supplementary Figs. S9-S12 for the 90% quantile threshold, and Supplementary Figs. S13-  
6  
7 234 S16 for the  $\leq 29$  threshold).

9 235 Finally, the weekly estimates of the net reproduction number  $R_t^w$  generally decreased from the  
10  
11 236 baseline value of the basic reproduction number  $R_0$  under pre-COVID social mixing, albeit with large  
12  
13 237 heterogeneity among countries (Fig. 3). In Italy, Spain, France, and Belgium, the reduction in contact  
14  
15 238 numbers under the 90% quantile threshold led to decreases between 75% and 90% of the baseline  $R_0$ , and  
16  
17 239 hence to a  $R_t^w$  with 95% CI fully below one, as early as in week 2020-11 in Italy, while in the UK and in  
18  
19 240 the US, such evidence did not appear until week 2020-13. In Germany, the decline in the overall contact  
20  
21 241 numbers led to a rather small decrease in the  $R_t^w$ , which reached its minimum value, 1.06 (0.63–1.51), in  
22  
23 242 week 2020-13. Under the  $\leq 29$  threshold, we found that the higher number of contacts entailed  
24  
25 243 reductions of smaller entity in both social contacts and in the  $R_t^w$ , which was below one for Italy and  
26  
27 244 Spain, and equal to one for Belgium, France, Netherlands, and, from week 13, the UK and the US  
28  
29 245 (Supplementary Fig. S17).  
30  
31  
32  
33  
34  
35  
36  
37  
38  
39  
40  
41  
42  
43  
44  
45  
46  
47  
48  
49  
50  
51  
52  
53  
54  
55  
56  
57  
58  
59  
60

**Table 1** Model-predicted mean number of daily contacts per person (with standard errors (SE)) compared with pre-pandemic model predictions, by country, setting, and week, March-April 2020. The “Overall” category encompasses contacts reported in all four surveyed settings, e.g., home, school, work, and general community.

| Country        | Setting   | Prior to COVID-19 |      | Week 2020-11 (Mar 9 – 15) |      | Week 2020-12 (Mar 16 – 22) |      | Week 2020-13 (Mar 23 – 29) |      | Week 2020-14 (Mar 30 – April 5) |      | Week 2020-15 (Apr 6 – 12) |      |
|----------------|-----------|-------------------|------|---------------------------|------|----------------------------|------|----------------------------|------|---------------------------------|------|---------------------------|------|
|                |           | Mean              | SE   | Mean                      | SE   | Mean                       | SE   | Mean                       | SE   | Mean                            | SE   | Mean                      | SE   |
|                |           | Belgium           | Home | 3.15                      | 0.15 |                            |      |                            |      |                                 |      | 1.33                      | 0.05 |
|                | Community | 5.34              | 0.3  |                           |      |                            |      |                            |      | 0.64                            | 0.06 | 0.74                      | 0.03 |
|                | Work      | 3.05              | 0.36 |                           |      |                            |      |                            |      | 0.35                            | 0.07 | 0.36                      | 0.04 |
|                | Overall   | 11.78             | 0.48 |                           |      |                            |      |                            |      | 2.29                            | 0.11 | 2.38                      | 0.06 |
| France         | Home      | 2.7               | 0.07 |                           |      |                            |      | 1.28                       | 0.03 | 1.31                            | 0.03 | 1.25                      | 0.03 |
|                | Community | 4.59              | 0.13 |                           |      |                            |      | 0.5                        | 0.04 | 0.45                            | 0.03 | 0.41                      | 0.03 |
|                | Work      | 2.37              | 0.12 |                           |      |                            |      | 0.24                       | 0.04 | 0.23                            | 0.03 | 0.26                      | 0.04 |
|                | Overall   | 10.3              | 0.21 |                           |      |                            |      | 1.96                       | 0.07 | 1.93                            | 0.05 | 1.89                      | 0.06 |
| Germany        | Home      | 2.73              | 0.1  |                           |      | 1.52                       | 0.04 | 1.44                       | 0.03 | 1.45                            | 0.02 | 1.46                      | 0.02 |
|                | Community | 2.97              | 0.14 |                           |      | 1.33                       | 0.07 | 1.13                       | 0.05 | 0.93                            | 0.03 | 1.15                      | 0.04 |
|                | Work      | 1.82              | 0.17 |                           |      | 0.76                       | 0.1  | 0.56                       | 0.05 | 0.71                            | 0.05 | 0.68                      | 0.05 |
|                | Overall   | 8.03              | 0.27 |                           |      | 3.29                       | 0.12 | 3.1                        | 0.09 | 2.94                            | 0.06 | 3.15                      | 0.06 |
| Italy          | Home      | 3.56              | 0.19 | 1.67                      | 0.03 | 1.63                       | 0.03 | 1.57                       | 0.03 | 1.5                             | 0.04 | 1.6                       | 0.05 |
|                | Community | 7.91              | 0.36 | 0.71                      | 0.04 | 0.6                        | 0.03 | 0.47                       | 0.03 | 0.48                            | 0.03 | 0.56                      | 0.05 |
|                | Work      | 5.28              | 0.53 | 0.51                      | 0.04 | 0.36                       | 0.04 | 0.25                       | 0.03 | 0.21                            | 0.03 | 0.3                       | 0.06 |
|                | Overall   | 18.19             | 0.61 | 2.9                       | 0.08 | 2.47                       | 0.06 | 2.23                       | 0.06 | 2.17                            | 0.06 | 2.36                      | 0.09 |
| Netherlands    | Home      | 3                 | 0.23 |                           |      |                            |      |                            |      | 1.57                            | 0.04 | 1.56                      | 0.04 |
|                | Community | 7.13              | 0.76 |                           |      |                            |      |                            |      | 0.85                            | 0.04 | 0.91                      | 0.04 |
|                | Work      | 4.97              | 1.08 |                           |      |                            |      |                            |      | 0.67                            | 0.06 | 0.74                      | 0.07 |
|                | Overall   | 15.03             | 1.2  |                           |      |                            |      |                            |      | 2.97                            | 0.09 | 3.11                      | 0.1  |
| Spain          | Home      |                   |      |                           |      |                            |      | 1.63                       | 0.04 | 1.61                            | 0.03 | 1.65                      | 0.03 |
|                | Community |                   |      |                           |      |                            |      | 0.66                       | 0.05 | 0.45                            | 0.03 | 0.49                      | 0.03 |
|                | Work      |                   |      |                           |      |                            |      | 0.25                       | 0.05 | 0.19                            | 0.03 | 0.26                      | 0.03 |
|                | Overall   |                   |      |                           |      |                            |      | 2.47                       | 0.08 | 2.25                            | 0.05 | 2.3                       | 0.06 |
| United Kingdom | Home      | 3.54              | 0.14 | 1.65                      | 0.06 | 1.62                       | 0.05 | 1.51                       | 0.03 | 1.52                            | 0.03 | 1.56                      | 0.04 |
|                | Community | 4.07              | 0.21 | 1.27                      | 0.09 | 1.3                        | 0.1  | 0.62                       | 0.03 | 0.51                            | 0.03 | 0.53                      | 0.04 |
|                | Work      | 2.89              | 0.39 | 0.65                      | 0.12 | 0.51                       | 0.12 | 0.37                       | 0.04 | 0.2                             | 0.04 | 0.2                       | 0.04 |
|                | Overall   | 10.58             | 0.35 | 3.43                      | 0.17 | 3.18                       | 0.15 | 2.4                        | 0.05 | 2.17                            | 0.06 | 2.28                      | 0.07 |
| United States  | Home      |                   |      | 1.66                      | 0.05 | 1.69                       | 0.03 | 1.66                       | 0.02 | 1.56                            | 0.04 | 1.69                      | 0.03 |
|                | Community |                   |      | 1.5                       | 0.07 | 1.07                       | 0.05 | 0.8                        | 0.03 | 0.7                             | 0.03 | 0.72                      | 0.03 |
|                | Work      |                   |      | 0.64                      | 0.08 | 0.55                       | 0.06 | 0.47                       | 0.04 | 0.45                            | 0.05 | 0.41                      | 0.05 |
|                | Overall   |                   |      | 3.67                      | 0.13 | 3.17                       | 0.08 | 2.82                       | 0.06 | 2.67                            | 0.05 | 2.72                      | 0.06 |

## 251 **DISCUSSION**

252 This paper provided comparative estimates of the daily number of social contacts, overall and by setting  
253 of contact, that people had during the early phase of the COVID-19 pandemic, between March 13 (week  
254 2020-11) and April 12 (week 2020-15), in Belgium, France, Germany, Italy, the Netherlands, Spain, the  
255 UK, and the US, disaggregated by week. Compared to the pre-COVID period, overall contact numbers  
256 had substantively decreased, although not uniformly across all countries. Reductions were smaller than  
257 the 86% observed in Wuhan (China) in February 2020 [9], as they ranged from 32% in Germany to 81%  
258 in Italy, under the  $\leq 29$  contacts threshold. Our estimates were consistent with those from other  
259 independent studies conducted at the same time in Europe and the US [10–14,17]. The unique aspect of  
260 our study is that it is the only one to use a consistent approach to collect comparative data across several  
261 countries and on a daily basis over an extended period of time.

262 Three results are especially relevant to characterize the changes in social contact patterns and  
263 their implications for infection transmission. First, our findings suggest that the countries with the highest  
264 numbers of social contacts were those that implemented only partial lockdowns (or stricter versions of the  
265 physical distancing guidelines), whereas those that implemented full lockdowns experienced much lower  
266 contact numbers. In this latter group, compared to the pre-pandemic period, the household replaced the  
267 general community as the main source of social contacts, while in Germany and the Netherlands the  
268 general community and the work remained the settings contributing the most to the overall contact  
269 patterns.

270 Second, results for the UK and the US showed that the numbers of contacts declined sharply after  
271 governments issued physical distancing guidelines, even before the introduction of lockdown measures,  
272 showing how spontaneous individual responses may also have played a role in the rapid adoption of  
273 protective behaviour. This observation is consistent with the strong association between high perception  
274 risk and the wearing of face masks among vulnerable people [32], as well as with mobile phone data  
275 made available by Google, illustrating the change in human mobility compared to January and February  
276 2020 [33,34].

1  
2  
3 277 Third, in almost all countries, we found that the reduction in contact numbers, while keeping  
4  
5 278 fixed other epidemiological factors, resulted in a reduction of the net reproduction number  $R_t$  below one,  
6  
7 279 and was therefore associated with a lower infection transmission, especially in a period in which the  
8  
9 280 adoption rate of the face mask outside the home was still low, albeit gradually increasing. The exception  
10  
11 281 was Germany, where the estimates of  $R_t$  remained consistently above one during the study period.  
12  
13  
14 282 Independent estimates of  $R_t$  at the beginning of April in Germany, i.e., 1.1 with 95% CI 0.9–1.4,  
15  
16 283 calculated by the Robert Koch Institute using incidence data, were consistent with our estimates under the  
17  
18 284 90% quantile threshold [35]. Our results can be explained by the relatively low social contact numbers in  
19  
20 285 Germany during the pre-COVID period (eight contacts per day, on average) and the smaller reductions in  
21  
22 286 social contact numbers during the study period. Nonetheless, our estimates should not be interpreted as  
23  
24 287 evidence that the infection spread was exceptionally high in Germany despite physical distancing  
25  
26 288 interventions. Changes in the  $R_t$  are brought about not only by changes in social contact patterns, but also  
27  
28  
29 289 in infection transmissibility, which might be affected by several additional factors, such as travel  
30  
31 290 restrictions, keeping the distance between people while having conversations in public spaces, increased  
32  
33 291 hand washing or sanitizing, and the use of face masks [31,36,37], which we did not explicitly consider in  
34  
35 292 the calculation of  $R_t$ .

36  
37 293 The study has other limitations that should be considered when interpreting the results. First, we  
38  
39 294 collected data using a sample of Facebook users. Although such nonprobability samples are somewhat  
40  
41 295 less accurate than probability samples in obtaining statistics that are generalisable to the whole  
42  
43 296 population, with the appropriate statistical adjustments, such as those we made, they offer a good  
44  
45 297 approximation to results that could be obtained from probabilistic samples, at least at the country level.  
46  
47 298 Furthermore, samples of Facebook users can be gathered rapidly and therefore offer data that would be  
48  
49 299 difficult to collect otherwise during a pandemic. Indeed, to the best of our knowledge, our study is the  
50  
51 300 only cross-country survey on social contacts that exists for the unique period of time considered. Finally,  
52  
53 301 our data cover a large population at minimal costs compared to more traditional surveys [5].  
54  
55  
56  
57  
58  
59  
60



1  
2  
3 302 Second, our approach of recruiting survey respondents through targeted online advertisements  
4  
5 303 may aggravate issues of self-selection bias. Indeed, our participants might differ to some extent from the  
6  
7 304 general population in terms of their sociability patterns (due to their Facebook use) and their concerns  
8  
9 305 about health-related issues (as they opted in to participate in the survey). We tackled this issue by  
10  
11 306 stratifying the campaigns and applying post-stratification weights using factors that are linked to both  
12  
13 307 survey participation and the outcomes of interest [38,39], and ensuring that only respondents who were  
14  
15 308 shown the Facebook ads and clicked on the link could participate in the study (thereby avoiding biases in  
16  
17 309 the sample that we cannot adjust for). However, post-stratification weights cannot correct entirely for  
18  
19 310 different behaviours or social inequalities (e.g., education level, ethnicity, type of profession, or  
20  
21 311 urban/rural residence) among Facebook users, since such variables cannot be included in the ads  
22  
23 312 stratification. Further improvements, which go beyond of the scope of this work, may come from using a  
24  
25 313 multilevel regression and poststratification (MRP) approach, which has shown to work well in practice  
26  
27 314 when making inference from nonprobability samples, especially when having at disposal data from  
28  
29 315 census or a true probability sample on the demographic strata of interest in the population [40].

30  
31  
32 316 Third, several survey participants reported extremely high contact numbers, perhaps because they  
33  
34 317 had little motivation to provide accurate counts. This is a general problem in social contact surveys.  
35  
36 318 Typically, these surveys either include a maximum number of contacts that respondents can report, or  
37  
38 319 researchers assess ex-post the threshold level for the right tail of the contact distribution of contacts. We  
39  
40 320 followed the latter approach and removed respondents reporting implausible values. We found that our  
41  
42 321 results are robust to a choice of cut-off values consistent with those used in standard surveys in the field.  
43  
44 322 Future contact surveys may consider including attention checks items to reduce potential issues with  
45  
46 323 outliers.

47  
48  
49 324 Finally, the calculation of the net reproduction number hinges on two factors characterized by  
50  
51 325 large uncertainty, namely, the initial estimate of the basic reproduction number  $R_0$  and the age-specific  
52  
53 326 social contact matrix. For  $R_0$ , we employed a common value for all parameters coming from a meta-  
54  
55 327 analysis based on data from China, South Korea, and Italy; although this estimate was not specific for

1  
2  
3 328 each surveyed country, the attached uncertainty made it consistent with estimates used in other studies  
4  
5 329 [11,14,17] and allowed us to disentangle the impact of the reduction in contact numbers from that of other  
6  
7 330 epidemiological factors. For the contact matrices, as we did not collect the age of the individuals  
8  
9 331 contacted by respondents like other single-country studies did [10–12,14,17], we scaled down the pre-  
10  
11 332 pandemic matrices by age-specific factors derived from the data collected in our study. Although our  
12  
13 333 matrices are not based on the observed age mixing patterns during the early phase of the pandemic, we  
14  
15 334 believe that the results on the reduced infection transmission entailed by the reduced contact numbers is  
16  
17 335 still valid and consistent with the results of the other studies.

19  
20 336 In conclusion, we provided an international comparable set of statistics on social contact patterns  
21  
22 337 during the COVID-19 pandemic, disaggregated by country, setting, and week  
23  
24 338 ([https://osf.io/esdmg/?view\\_only=78fb4e2129384f3ba6c63aa67a5b9446](https://osf.io/esdmg/?view_only=78fb4e2129384f3ba6c63aa67a5b9446)). As these estimates offer a more  
25  
26 339 grounded alternative to the theoretical assumptions that have often been used [36,41,42], we believe that  
27  
28 340 the scientific community can draw on this information for developing more realistic epidemic models of  
29  
30 341 COVID-19.

32 342

34 343 **REFERENCES**

- 36  
37 344 1 Greenhalgh T, Jimenez JL, Prather KA, *et al.* Ten scientific reasons in support of airborne  
38 345 transmission of SARS-CoV-2. *The Lancet* 2021;**397**:1603–5. doi:10.1016/S0140-6736(21)00869-2  
39  
40 346 2 Wallinga J, Teunis P, Kretzschmar M. Using Data on Social Contacts to Estimate Age-specific  
41 347 Transmission Parameters for Respiratory-spread Infectious Agents. *Am J Epidemiol* 2006;**164**:936–  
42 348 44. doi:10.1093/aje/kwj317  
43  
44 349 3 Mossong J, Hens N, Jit M, *et al.* Social Contacts and Mixing Patterns Relevant to the Spread of  
45 350 Infectious Diseases. *PLoS Med* 2008;**5**:e74. doi:10.1371/journal.pmed.0050074  
46  
47 351 4 Perrotta D, Grow A, Rampazzo F, *et al.* Behaviours and attitudes in response to the COVID-19  
48 352 pandemic: insights from a cross-national Facebook survey. *EPJ Data Sci* 2021;**10**:1–13.  
49 353 doi:10.1140/epjds/s13688-021-00270-1  
50  
51 354 5 Grow A, Perrotta D, Del Fava E, *et al.* Addressing Public Health Emergencies via Facebook Surveys:  
52 355 Advantages, Challenges, and Practical Considerations. *J Med Internet Res* 2020;**22**:e20653.  
53 356 doi:10.2196/20653  
54  
55  
56  
57  
58  
59  
60

- 1  
2  
3 357 6 Béraud G, Kazmerczak S, Beutels P, *et al.* The French Connection: The First Large Population-  
4 358 Based Contact Survey in France Relevant for the Spread of Infectious Diseases. *PLoS ONE*  
5 359 2015;**10**:e0133203. doi:10.1371/journal.pone.0133203  
6  
7 360 7 Melegaro A, Jit M, Gay N, *et al.* What types of contacts are important for the spread of infections?  
8 361 Using contact survey data to explore European mixing patterns. *Epidemics* 2011;**3**:143–51.  
9 362 doi:10.1016/j.epidem.2011.04.001  
10  
11 363 8 Brooks-Pollock E, Read JM, McLean AR, *et al.* Mapping social distancing measures to the  
12 364 reproduction number for COVID-19. *Philos Trans R Soc B Biol Sci* 2021;**376**:20200276.  
13 365 doi:10.1098/rstb.2020.0276  
14  
15 366 9 Zhang J, Litvinova M, Liang Y, *et al.* Changes in contact patterns shape the dynamics of the COVID-  
16 367 19 outbreak in China. *Science* 2020;**368**:1481–6. doi:10.1126/science.abb8001  
17  
18 368 10 Backer JA, Mollema L, Vos ER, *et al.* Impact of physical distancing measures against COVID-19 on  
19 369 contacts and mixing patterns: repeated cross-sectional surveys, the Netherlands, 2016–17, April 2020  
20 370 and June 2020. *Eurosurveillance* 2021;**26**:2000994. doi:10.2807/1560-7917.ES.2021.26.8.2000994  
21  
22 371 11 Coletti P, Wambua J, Gimma A, *et al.* CoMix: comparing mixing patterns in the Belgian population  
23 372 during and after lockdown. *Sci Rep* 2020;**10**:21885. doi:10.1038/s41598-020-78540-7  
24  
25 373 12 Latsuzbaia A, Herold M, Bertemes J-P, *et al.* Evolving social contact patterns during the COVID-19  
26 374 crisis in Luxembourg. *PLoS ONE* 2020;**15**:e0237128. doi:10.1371/journal.pone.0237128  
27  
28 375 13 Sypsa V, Roussos S, Paraskevis D, *et al.* Effects of Social Distancing Measures during the First  
29 376 Epidemic Wave of Severe Acute Respiratory Syndrome Infection, Greece - Volume 27, Number 2—  
30 377 February 2021 - Emerging Infectious Diseases journal - CDC. *Emerg Infect Dis* 2021;**27**:452–62.  
31 378 doi:10.3201/eid2702.203412  
32  
33 379 14 Jarvis CI, Van Zandvoort K, Gimma A, *et al.* Quantifying the impact of physical distance measures  
34 380 on the transmission of COVID-19 in the UK. *BMC Med* 2020;**18**:124. doi:10.1186/s12916-020-  
35 381 01597-8  
36  
37 382 15 Quaife M, van Zandvoort K, Gimma A, *et al.* The impact of COVID-19 control measures on social  
38 383 contacts and transmission in Kenyan informal settlements. *BMC Med* 2020;**18**:316.  
39 384 doi:10.1186/s12916-020-01779-4  
40  
41 385 16 Dorélien AM, Simon A, Hagge S, *et al.* Minnesota Social Contacts and Mixing Patterns Survey with  
42 386 Implications for Modelling of Infectious Disease Transmission and Control. *Surv Pract*  
43 387 2020;**13**:13669. doi:10.29115/SP-2020-0007  
44  
45 388 17 Feehan DM, Mahmud AS. Quantifying population contact patterns in the United States during the  
46 389 COVID-19 pandemic. *Nat Commun* 2021;**12**:893. doi:10.1038/s41467-021-20990-2  
47  
48 390 18 Pötzschke S, Braun M. Migrant Sampling Using Facebook Advertisements: A Case Study of Polish  
49 391 Migrants in Four European Countries. *Soc Sci Comput Rev* 2016;**35**:633–53.  
50 392 doi:10.1177/0894439316666262  
51  
52 393 19 Zhang B, Mildenerberger M, Howe PD, *et al.* Quota sampling using Facebook advertisements. *Polit Sci*  
53 394 *Res Methods* 2018;:1–7. doi:10.1017/psrm.2018.49  
54  
55  
56  
57  
58  
59  
60

- 1  
2  
3 395 20 Eurostat. *Eurostat regional yearbook: 2019 edition*. 2019.  
4 396 [http://publications.europa.eu/publication/manifestation\\_identifier/PUB\\_KSHA19001ENN](http://publications.europa.eu/publication/manifestation_identifier/PUB_KSHA19001ENN) (accessed  
5 397 15 May 2020).
- 7 398 21 US Census Bureau. 2018 Population Estimates by Age, Sex, Race and Hispanic Origin. U. S. Census  
8 399 Bur. 2019. <https://www.census.gov/newsroom/press-kits/2019/detailed-estimates.html> (accessed 15  
9 400 May 2020).
- 11 401 22 Teslya A, Pham TM, Godijk NG, *et al*. Impact of self-imposed prevention measures and short-term  
12 402 government-imposed social distancing on mitigating and delaying a COVID-19 epidemic: A  
13 403 modelling study. *PLoS Med* 2020;**17**:e1003166. doi:10.1371/journal.pmed.1003166
- 15 404 23 Hens N, Goeyvaerts N, Aerts M, *et al*. Mining social mixing patterns for infectious disease models  
16 405 based on a two-day population survey in Belgium. *BMC Infect Dis* 2009;**9**. doi:10.1186/1471-2334-9-  
17 406 5
- 19 407 24 Liu Q-H, Ajelli M, Aleta A, *et al*. Measurability of the epidemic reproduction number in data-driven  
20 408 contact networks. *Proc Natl Acad Sci* 2018;**115**:12680–5. doi:10.1073/pnas.1811115115
- 22 409 25 The Royal Society. Reproduction number (R) and growth rate (r) of the COVID-19 epidemic in the  
23 410 UK. 2020. <https://royalsociety.org/news/2020/09/set-c-covid-r-rate/>
- 25 411 26 Diekmann O, Heesterbeek JAP, Metz JAJ. On the definition and the computation of the basic  
26 412 reproduction ratio  $R_0$  in models for infectious diseases in heterogeneous populations. *J Math Biol*  
27 413 1990;**28**:365–82. doi:10.1007/BF00178324
- 29 414 27 Goeyvaerts N, Hens N, Ogunjimi B, *et al*. Estimating infectious disease parameters from data on  
30 415 social contacts and serological status. *J R Stat Soc Ser C Appl Stat* 2010;**59**:255–77.  
31 416 doi:10.1111/j.1467-9876.2009.00693.x
- 33 417 28 Arregui S, Aleta A, Sanz J, *et al*. Projecting social contact matrices to different demographic  
34 418 structures. *PLoS Comput Biol* 2018;**14**:e1006638. doi:10.1371/journal.pcbi.1006638
- 36 419 29 R Core Team. *R: A Language and Environment for Statistical Computing*. Vienna, Austria: : R  
37 420 Foundation for Statistical Computing 2021. <https://www.R-project.org/>
- 39 421 30 Mervosh S, Lu D, Swales V. See Which States and Cities Have Told Residents to Stay at Home. N.  
40 422 Y. Times. 2020. <https://www.nytimes.com/interactive/2020/us/coronavirus-stay-at-home-order.html>  
41 423 (accessed 25 Sep 2020).
- 43 424 31 Flaxman S, Mishra S, Gandy A, *et al*. Estimating the effects of non-pharmaceutical interventions on  
44 425 COVID-19 in Europe. *Nature* 2020;**584**:257–61. doi:10.1038/s41586-020-2405-7
- 46 426 32 Perrotta D, Del Fava E, Zagheni E. The Role of Vulnerability in Mediating the Relationship between  
47 427 Threat Perception and the Use of Face Masks in the Context of COVID-19. In: *Workshop*  
48 428 *Proceedings of the 15th International AAAI Conference on Web and Social Media*. 2021.  
49 429 <https://doi.org/10.36190/2021.43> (accessed 24 Jun 2021).
- 51 430 33 Google LLC. Google COVID-19 Community Mobility Reports.  
52 431 <https://www.google.com/covid19/mobility/> (accessed 22 Jun 2020).

- 1  
2  
3 432 34 Basellini U, Alburez-Gutierrez D, Del Fava E, *et al*. Linking excess mortality to mobility data during  
4 433 the first wave of COVID-19 in England and Wales. *SSM - Popul Health* 2021;**14**:100799.  
5 434 doi:10.1016/j.ssmph.2021.100799  
6  
7 435 35 RKI. RKI - Coronavirus SARS-CoV-2 - Situation report - 9 Apr 2020. Robert Koch Institute 2020.  
8 436 [https://www.rki.de/DE/Content/InfAZ/N/Neuartiges\\_Coronavirus/Situationsberichte/2020-04-09-](https://www.rki.de/DE/Content/InfAZ/N/Neuartiges_Coronavirus/Situationsberichte/2020-04-09-en.pdf?__blob=publicationFile)  
9 437 [en.pdf?\\_\\_blob=publicationFile](https://www.rki.de/DE/Content/InfAZ/N/Neuartiges_Coronavirus/Situationsberichte/2020-04-09-en.pdf?__blob=publicationFile), (accessed 15 May 2020).  
10  
11 438 36 Dehning J, Zierenberg J, Spitzner FP, *et al*. Inferring change points in the spread of COVID-19  
12 439 reveals the effectiveness of interventions. *Science* 2020;**369**. doi:10.1126/science.abb9789  
13  
14 440 37 Chinazzi M, Davis JT, Ajelli M, *et al*. The effect of travel restrictions on the spread of the 2019 novel  
15 441 coronavirus (COVID-19) outbreak. *Science* Published Online First: 6 March 2020.  
16 442 doi:10.1126/science.aba9757  
17  
18 443 38 Keiding N, Louis TA. Perils and potentials of self-selected entry to epidemiological studies and  
19 444 surveys. *J R Stat Soc Ser A Stat Soc* 2016;**179**:319–76. doi:10.1111/rssa.12136  
20  
21 445 39 Mercer AW, Kreuter F, Keeter S, *et al*. Theory and Practice in Nonprobability Surveys Parallels  
22 446 between Causal Inference and Survey Inference. *Public Opin Q* 2017;**81**:250–71.  
23 447 doi:10.1093/poq/nfw060  
24  
25 448 40 Wang W, Rothschild D, Goel S, *et al*. Forecasting elections with non-representative polls. *Int J*  
26 449 *Forecast* 2015;**31**:980–91. doi:10.1016/j.ijforecast.2014.06.001  
27  
28 450 41 Gatto M, Bertuzzo E, Mari L, *et al*. Spread and dynamics of the COVID-19 epidemic in Italy: Effects  
29 451 of emergency containment measures. *Proc Natl Acad Sci* 2020;**117**:10484–91.  
30 452 doi:10.1073/pnas.2004978117  
31  
32 453 42 Salje H, Kiem CT, Lefrancq N, *et al*. Estimating the burden of SARS-CoV-2 in France. *Science*  
33 454 2020;**369**:208–11. doi:10.1126/science.abc3517  
34  
35  
36 455  
37  
38  
39 456 **STATEMENTS**  
40  
41 457 **Author Contributions**  
42  
43 458 Conceptualization: EDF, EZ; Data Curation: AG, JC; Formal analysis and investigation: EDF, JC; Project  
44  
45 459 Administration: DP, AG; Writing - original draft preparation: EDF, JC, EZ; Writing - review and editing:  
46  
47 460 EDF, JC, DP, AG, FR, SGC, EZ; Funding acquisition: EZ; Resources: DP, AG, FR, SGC; Supervision:  
48  
49 461 EZ.  
50  
51 462 **Competing interests**  
52  
53 463 None declared.  
54  
55 464 **Funding**  
56  
57  
58  
59  
60

1  
2  
3 465 This study was funded with support from the Max Planck Institute for Demographic Research (no  
4  
5 466 award/grant number received), which is part of the Max Planck Society.

### 6 7 467 **Data sharing**

8  
9 468 The aggregated contact data that underlie the analyses reported here are provided as weighted averages of  
10  
11 469 daily contact numbers by threshold, country, calendar week, and setting, both overall and stratified by  
12  
13 470 region of residence, age group and sex, at the following link:

14  
15  
16 471 [https://osf.io/esdmg/?view\\_only=78fb4e2129384f3ba6c63aa67a5b9446](https://osf.io/esdmg/?view_only=78fb4e2129384f3ba6c63aa67a5b9446).

### 17 18 472 **Ethics approval and consent to participate**

19  
20 473 Ethical approval for the study was obtained from the Ethics Council of the Max Planck Society  
21  
22 474 (Application No: 2020\_07). Participation in this study was voluntary, anonymous, and open to people  
23  
24 475 who were at least 18 years old. Electronic informed consent was obtained from all participants who  
25  
26 476 actively opted in to participate in the online survey, enabling the collection, storage, and processing of  
27  
28 477 their answers.

### 29 30 478 **Acknowledgements**

31  
32 479 We thank all participants who took the time to voluntarily complete our survey; the staff at the Max  
33  
34 480 Planck Institute for Demographic Research who contributed to the realization of this project, including  
35  
36 481 the administrative department, the IT department, and the press department; and all our colleagues who  
37  
38 482 took the time to review the translation and the implementation of the survey (Maarten J. Bijlsma, Mathias  
39  
40 483 Lerch, Marília R. Nepomuceno, Tom Theile, Nicolas Todd, Joshua Wilde). We also thank two  
41  
42 484 anonymous referees and the Editor of the Journal, whose valuable comments allowed us to greatly  
43  
44 485 improve the quality of the manuscript.

### 45 46 486 **Figure legends**

47  
48  
49 487 **Fig. 1** Mean overall number of daily social contacts (with 95% CI) smoothed by a simple two-day  
50  
51 488 moving average, by country and study day, March-April 2020. The dotted line corresponds to the date in  
52  
53 489 which the physical distancing guidelines were introduced at the national level; the dashed line  
54  
55 490 corresponds to the date in which the lockdown, regardless of being full or partial, was ordered.

1  
2  
3 491 **Fig. 2** Prevalence of participants' uptake of different behavioural measures to protect themselves from the  
4  
5 492 coronavirus and feeling of threat (averaging the feeling of threat to oneself with that to the family, after  
6  
7 493 rescaling to a 0-100 scale), by country and week.

9 494 **Fig. 3** Absolute change in the weekly net reproduction number  $R_t^w$  with respect to the basic reproduction  
10  
11 495 number  $R_0$  at baseline (A) and percent reduction with respect to  $R_0$  (B), by country and week. The 95%  
12  
13  
14 496 CIs are based on 5,000 replicates.

15  
16  
17  
18  
19  
20  
21  
22  
23  
24  
25  
26  
27  
28  
29  
30  
31  
32  
33  
34  
35  
36  
37  
38  
39  
40  
41  
42  
43  
44  
45  
46  
47  
48  
49  
50  
51  
52  
53  
54  
55  
56  
57  
58  
59  
60

For peer review only

Type Overall Home Work General community

1  
2  
3  
4  
5  
6  
7  
8  
9  
10  
11  
12  
13  
14  
15  
16  
17  
18  
19  
20  
21  
22  
23  
24  
25  
26  
27  
28  
29  
30  
31  
32  
33  
34  
35  
36  
37  
38

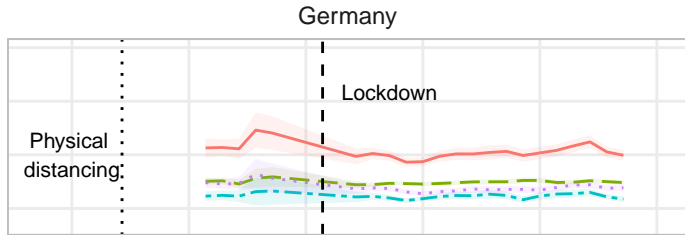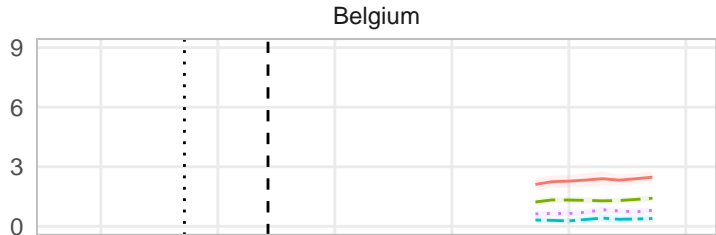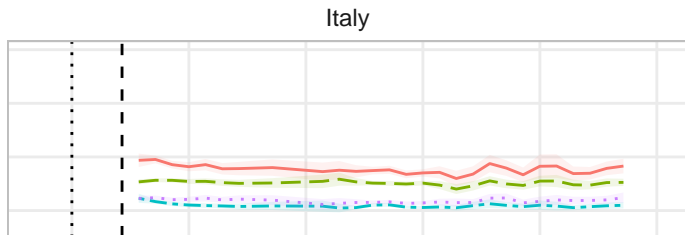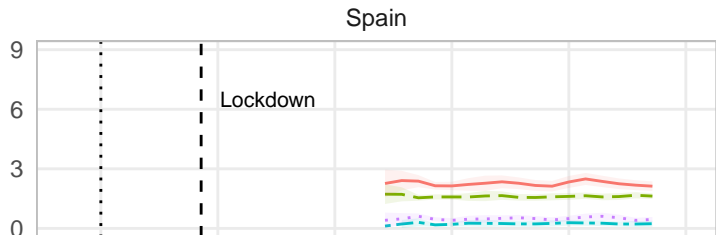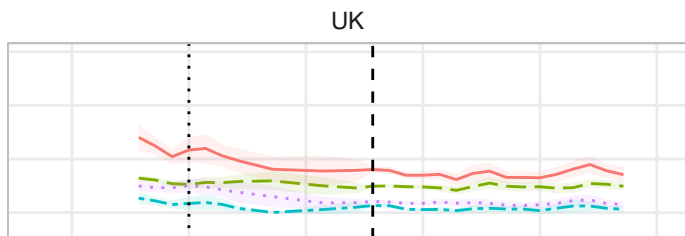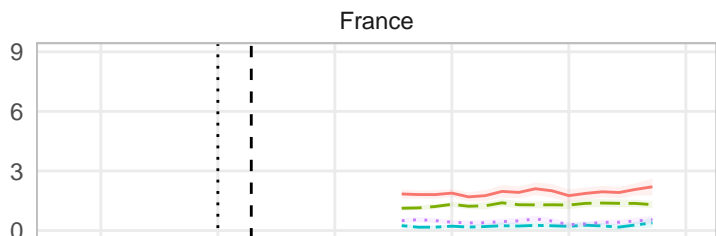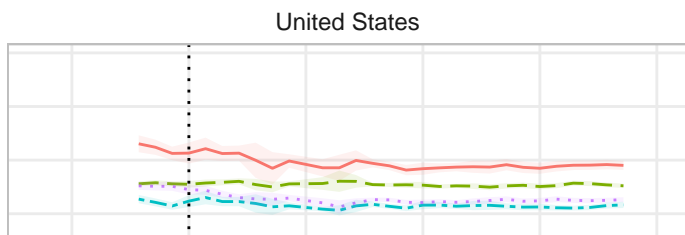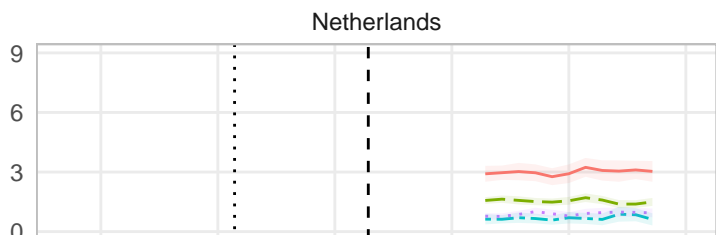

Date of contacts

Date of contacts



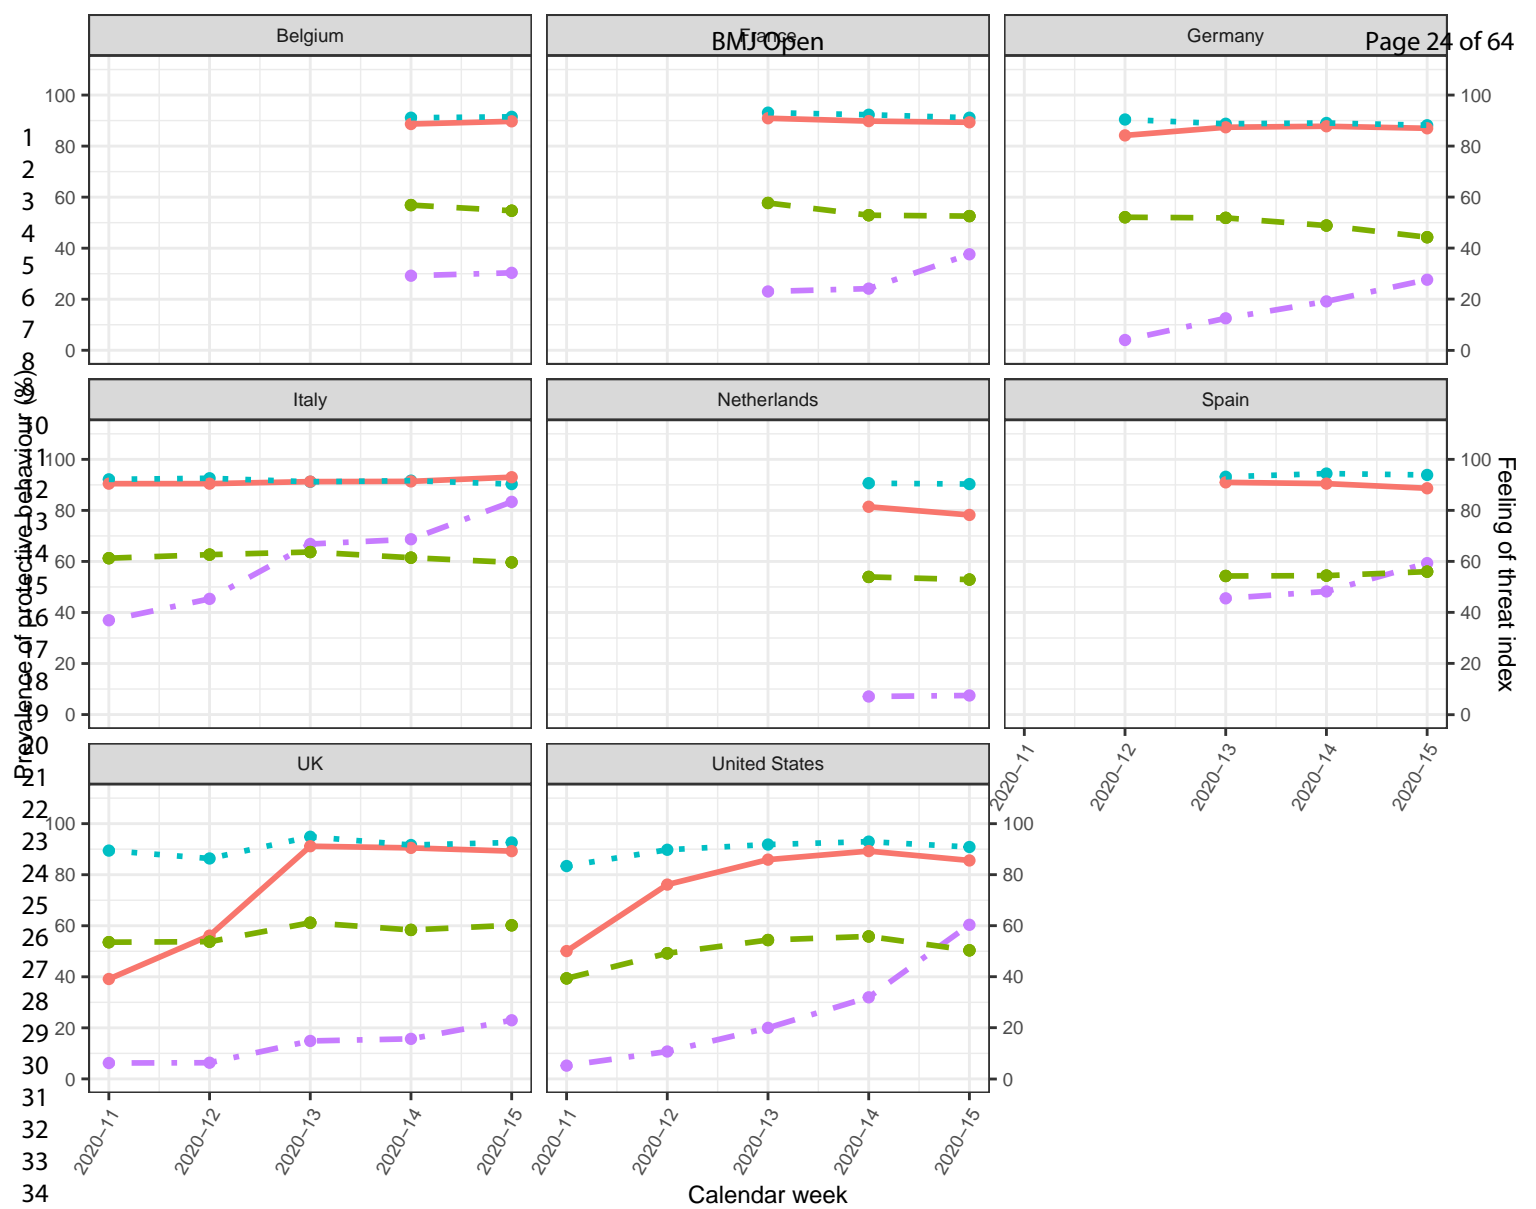

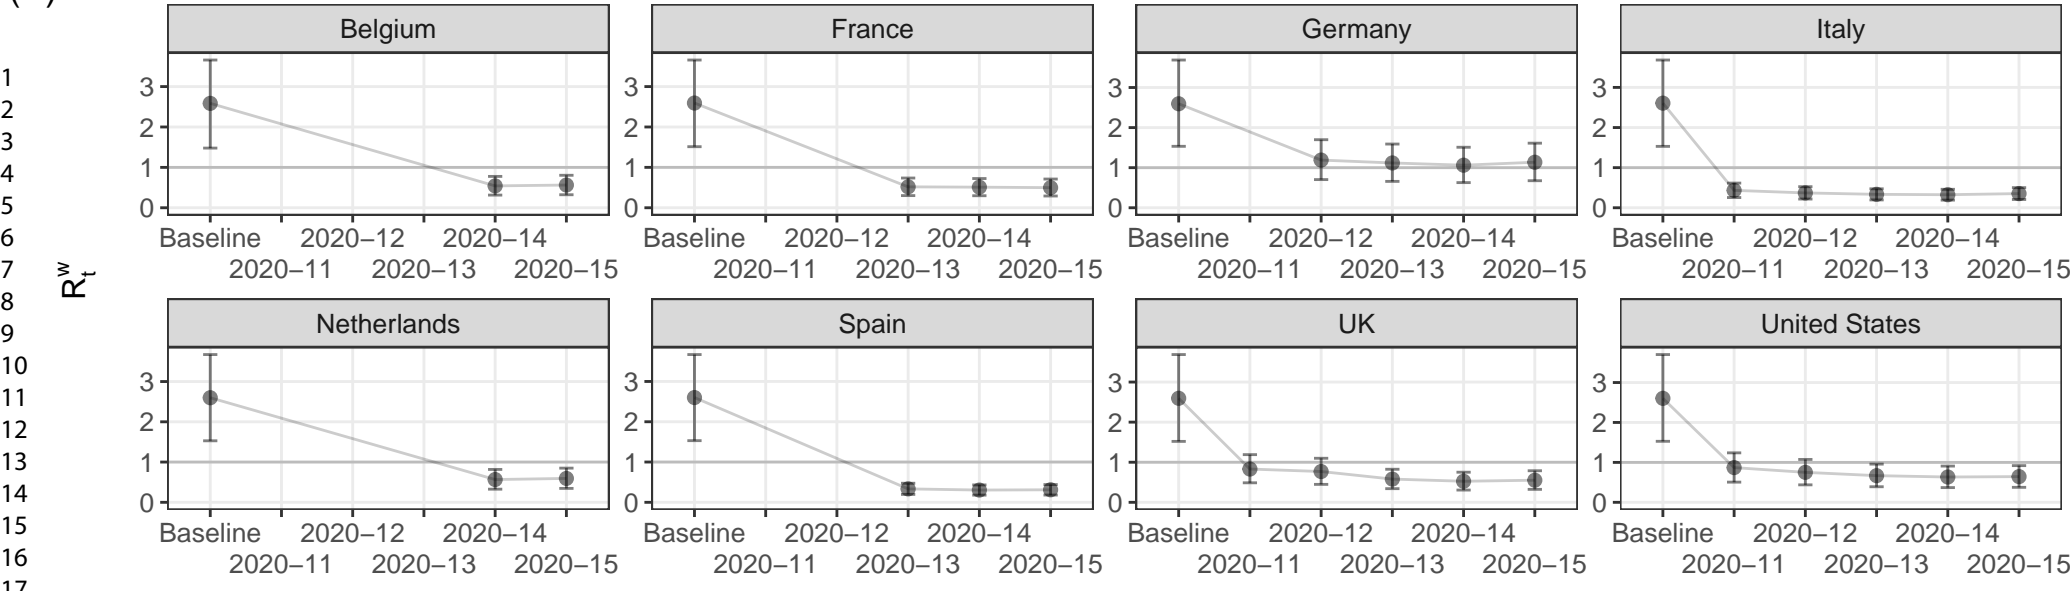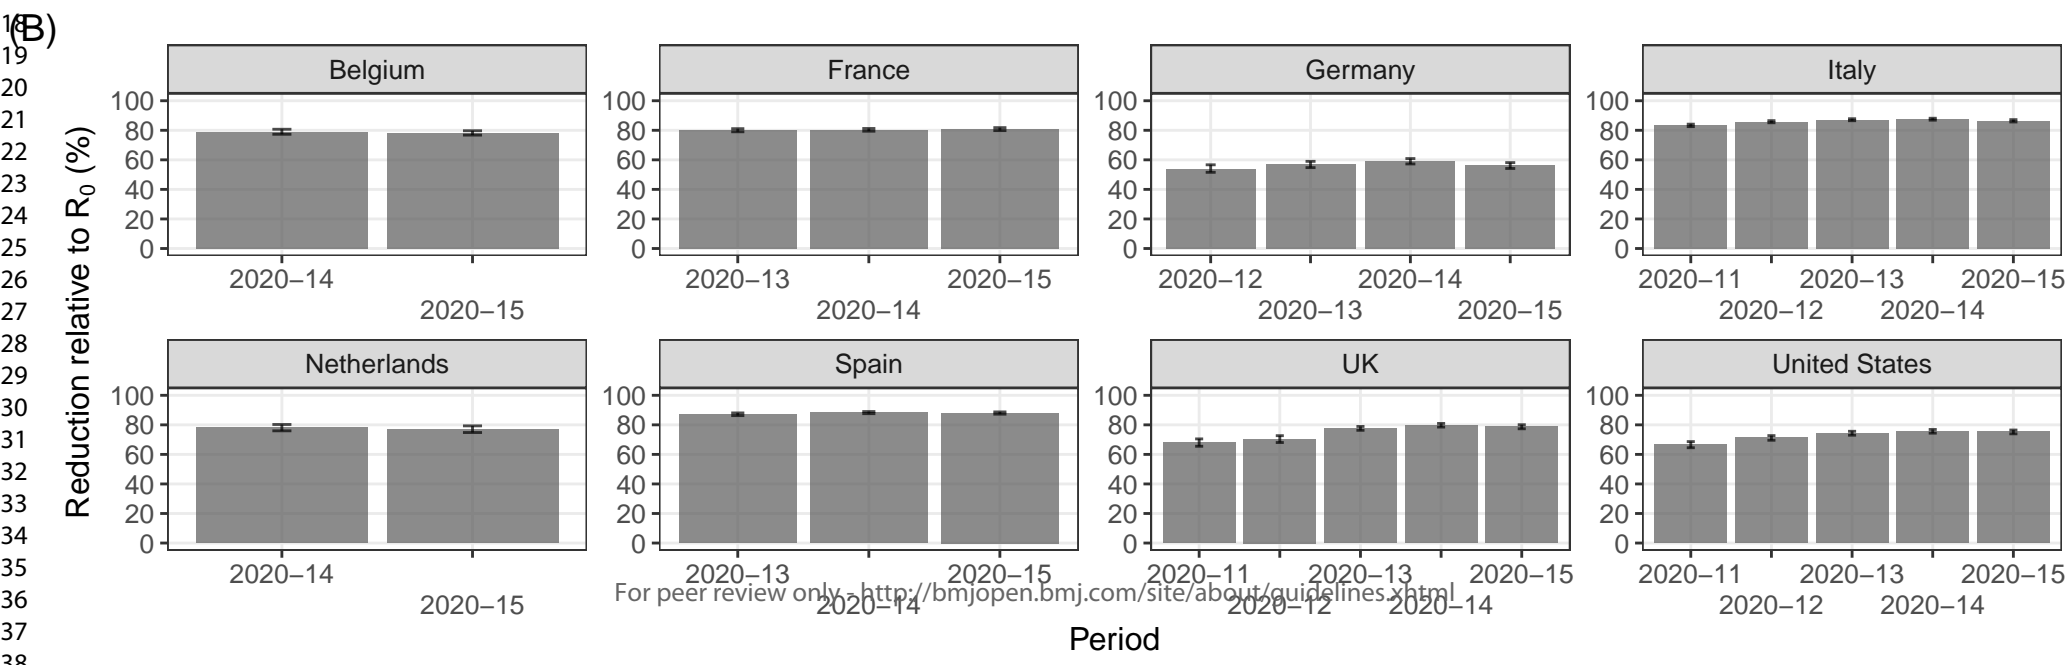

## Supplementary Material

### The differential impact of physical distancing strategies on social contacts relevant for the spread of SARS-CoV-2: Evidence from a cross-national online survey, March – April 2020

#### Contents

|                                                           |    |
|-----------------------------------------------------------|----|
| <b>Additional methods</b> .....                           | 2  |
| Survey design .....                                       | 2  |
| Recruitment Strategy .....                                | 2  |
| Poststratification .....                                  | 3  |
| Social contact data .....                                 | 3  |
| Health behaviours and perceived risk .....                | 4  |
| Epidemiological analysis .....                            | 4  |
| <b>Additional figures</b> .....                           | 7  |
| <b>Additional tables</b> .....                            | 23 |
| Comparison between the raw and the weighted samples ..... | 23 |
| Effect for the contact threshold values .....             | 31 |
| <b>References</b> .....                                   | 37 |

## Additional methods

### Survey design

The data used in the analysis came from the Covid-19 Health Behaviour Survey (CHBS), an online survey carried out in multiple countries (and multiple languages) to collect key information about people's health and behaviour during the early phase of the pandemic (March – April 2020) [1]. Participation was voluntary and open to people who were at least 18 years old. Recruitment occurred through targeted advertisements implemented through the Facebook Ads Manager (FAM), which is a tool that can be used to quickly reach large numbers of survey participants across several countries [2]. The ads were stratified by age group, sex, and region of residence (largely following the NUTS-1 classification in Europe and the census regions in the United States, both aggregated into larger macro-regions) to ensure that a minimum number of respondents was reached in all demographic strata.

The questionnaire was divided into multiple sections covering different areas of interest: socio-demographic indicators (age, gender, country of birth, region of residence, level of education, and household size); health indicators (symptoms experienced in the previous seven days, among others); opinions and behaviours' (adoption of protective behaviours and disruption to daily routines, among others); and social contact data. For the purposes of validation and comparability, the questionnaire included standard questions taken from relevant sources, such as the European Social Survey for socio-demographic questions [3], and an Ipsos poll for questions related to public opinion on the COVID-19 outbreak [4].

Informed consent was obtained from all participants, enabling the collection, storage, and processing of their answers. Participants' data was treated anonymously. Ethical approval for the study was obtained from the Ethics Council of the Max Planck Society.

### Recruitment Strategy

Marketers use the FAM to advertise their products or businesses. The FAM enables advertisers to create advertising campaigns that can have various goals, such as creating salience for a given service or product among Facebook users or generating traffic to an external website. Following previous examples of Facebook surveys [5–7], we used the FAM to run campaigns to recruit respondents for our study. The countries included in the study, selected because of the number of COVID-19 cases they were experiencing, were Germany, Italy, Spain, the UK, the US, France, Belgium, and the Netherlands. The FAM allowed us to perform non-probabilistic quota sampling by targeting user groups based on demographic characteristics such as sex, age, and region of residence. In this way, we could not only ensure a minimum number of participants in each combination of strata, but we were also able to control for variables possibly associated the survey outcomes and the propensity to take the survey [8,9].

1  
2  
3 At the beginning of March 2020, prior to the start of the actual survey, we carried out separate  
4 pilots in Italy, the UK, and the US to test the FAM and the performance of our ads, allowing the study to  
5 officially begin on March 13. Fig. S1 shows the question that prompted survey participants to report the  
6 information on their social contacts in the English-language version of the questionnaire.  
7  
8

9 Due to technical problems on the Facebook platform for some countries, very few respondents  
10 accessed the survey on certain days between March 20 and March 25. We thus excluded from the analysis  
11 those days with less than ten respondents. Although this issue might have increased the uncertainty in the  
12 model predictions (especially the daily ones), we believe that the analysis by week is robust and less  
13 affected by this issue.  
14  
15  
16  
17  
18

## 19 Poststratification

20 Since online surveys are not random samples of the population, we adjusted our survey data using a  
21 poststratification weighting approach. In particular, given that our aim was to achieve a nationally  
22 representative sample, we stratified the survey by sex, age group, and region of residence, which are all  
23 important variables that are related to differences in people's responses to the pandemic, as well as to  
24 survey participation. In order to create poststratification weights, we divided the true population  
25 proportion in each stratum, obtained from nationally representative data available through Eurostat (2019)  
26 [3] and the US census (2018) [10], by the sample proportion from the same stratum in our survey. These  
27 poststratification weights were used in all the statistical analyses presented in this paper.  
28  
29  
30  
31  
32  
33  
34

## 35 Social contact data

36 We defined social contacts, which are the focus of this paper, as any interaction involving either physical  
37 contact (such as a handshake or a hug) or a conversation of three or more words in the physical presence  
38 of another person. This definition is consistent with the definition employed in past social contact surveys,  
39 which we used as the baseline for comparison in this work [11,12]. In more detail, we asked respondents  
40 to report the number of individuals with whom they interacted on the day before the survey in different  
41 settings: i.e., at home, at school or college, at work, and in the general community (such as during  
42 commuting or leisure activities); while making it clear that the respondent should not report multiple  
43 interactions with the same person in different settings. However, unlike previous contact surveys, we did  
44 not ask about the characteristics of the contacted individuals (e.g., age and sex) to avoid overburdening  
45 respondents, given the nature of the online survey. The text describing the social contact question is shown  
46 in Fig. S1.  
47  
48  
49  
50  
51  
52  
53  
54  
55  
56  
57  
58  
59  
60

## Health behaviours and perceived risk

We asked respondents to rate the level of perceived threat they thought the COVID-19 posed to different levels of society (Q13), namely, (i) to themselves, (ii) to their family, (iii) to their local community, (iv) to their country, and (v) to the world, using a 5-point Likert scale. For the sake of our analysis, we rescaled participants' responses to the range 0 – 1, where zero indicated “very low threat” and one “very high threat”. To account for a feeling of threat that might have affected social contact patterns of respondents, we combined in one variable the perceived level of threat to themselves and to their families, taking their simple mean. These two indicators were found to have a good internal consistency, having a Cronbach's alpha of 0.84.

Moreover, we asked respondents which health behaviours, in the form of specific actions, they took up to protect themselves from the virus (Question (Q18): “Which of the following actions, if any, have you already taken to protect yourself from the coronavirus?”). Among the listed actions, coded as dummy variables, we asked whether respondents avoided shaking hands, social activities (e.g., meeting friends), crowded places (e.g., restaurants, cinemas, gym, or playground), travelling by public transportation (e.g., by bus, tram, subway, or train) or by taxi, whether they stockpiled medicines or food, whether they used a face mask, and whether they washed their hands or used a sanitizing hand gel more often. For our analysis, we picked three of these actions, which might have an impact on the transmissibility of the virus, namely, avoiding social activities (“Avoided social activities (e.g. meeting friends)”), wearing a face mask (“Worn a face mask”), and washing the hands more often (“Washed hands more often”) [13,14].

## Epidemiological analysis

The net reproduction number  $R_t$  can be estimated as the dominant eigenvalue, denoted as  $\rho$ , of the next generation matrix  $\mathbf{N}$ , i.e.,  $R_t = \rho(\mathbf{N})$ , where  $\mathbf{N}$  provides information on the numbers of newly infected individuals by age group at a given time [15]. Under the “social contact hypothesis”,  $\mathbf{N} = Dq\mathbf{C}$ , where  $\mathbf{C}$  is the matrix containing the average number of contacts between age groups,  $q$  is the disease transmissibility parameter, and  $D$  is the length of the infectiousness period [16]. We use the proportional relationship between  $\mathbf{N}$  and  $\mathbf{C}$ , i.e.,  $\mathbf{N} = \frac{R_t}{\rho(\mathbf{C})}\mathbf{C}$ , to assess changes in  $R_t$  due to changes in social contact numbers [17–19].

As we did not collect information on the age of the individuals encountered by the study participants, we derived the contact matrices  $\mathbf{C}$  for each study week using the following procedure. First, for each country, based on the data collected in the POLYMOD study between 2005 and 2006 [11], and in the Comes-F studies in 2012 [12], we constructed pre-COVID age-specific social contact matrices  $\mathbf{C}^{pre}$ ,

1  
2  
3 using the same age groups of the survey (18 – 24 years, 25 – 44 years, 45 – 64 years, and 65 years or  
4 more), which contained the average number of contacts between participants in the  $i$ th age group and their  
5 contactees in the  $j$ th age group, using a constraint for the reciprocity of contact when considering the total  
6 number of contacts at the population level. This constraint implies that, in a closed population, the total  
7 number of contacts from age class  $i$  to age class  $j$  must be equal to the total number of contacts from age  
8 class  $j$  to age class  $i$ . Hence, if we had  $N_i$  individuals in age class  $i$  and  $N_j$  individuals in age class  $j$ ,  
9 reciprocity would entail that  $C_{ij}N_j = C_{ji}N_i$ . For this purpose, we started by dividing the total number of  
10 contacts,  $M_{ij}$ , for the number of participants in each age group,  $n_i$ , i.e.,  $m_{ij} = M_{ij}/n_i$ . We then constructed  
11 the matrix with the total number of contacts between age classes at the population level, by multiplying  
12 the expected mean number of contacts reported by participants in the age group  $i$  with contactees in the  
13 age group  $j$ ,  $m_{ij}$ , for the total number of individuals in the age group  $i$  in the population, i.e.,  $Z_{ij} = m_{ij}N_i$ .  
14 At this point, we adjusted  $Z_{ij}$  for reciprocity by averaging the total number of contacts in one direction,  
15  $Z_{ij}$ , with those in the other direction,  $Z_{ji}$ , weighting for the sample size by age group, namely,  $Z_{ij}^{(rec.)} =$   
16  $(Z_{ij}n_i + Z_{ji}n_j)/(n_i + n_j)$  [20]. We finally obtained the expected average number of contacts under  
17 reciprocity at the population level dividing again by the population  $N_i$ , i.e.,  $C_{ij}^{pre} = Z_{ij}^{(rec.)}N_i$ .

18  
19  
20  
21  
22  
23  
24  
25  
26  
27  
28  
29 Second, we projected the matrices  $C^{pre}$  to the population structure of each country in 2020 [20]  
30 and, to remove differences in the contact levels between countries, we normalized each matrix  $C^{pre}$  to the  
31 average number of contacts at the population level, so that the mean number of contacts of the matrix  
32  $C^{pre+norm}$  was equal to one.

33  
34  
35 Finally, we multiplied the normalized matrix  $C^{pre+norm}$  by the average number of daily contacts  
36 that we predicted for each group and study week, thus obtaining the weekly COVID matrices  $C_w^{cov}$ .

37  
38  
39 As we did not collect data for people younger than 18 years old, we computed their average  
40 number of daily contacts per week in the following way. To reflect school closure during the survey  
41 period, we excluded school contacts from the contact data prior to COVID-19, considering only the  
42 overlapping age groups between the two types of matrices. Then, for each country, we computed a weekly  
43 overall scaling factor, and we obtained the average number of contacts for individuals aged less than 18 by  
44 multiplying their average number of pre-COVID-19 contacts in the population for such factor.

45  
46  
47  
48 To account for the uncertainty in the pre-COVID contact data, we applied a non-parametric  
49 bootstrap procedure to the original data, resampling with replacement the participants, proportionally to  
50 the population age distribution, and assigning them to their original contact data.

As a last request, we would like you to record the number of persons you had **contact with yesterday** in different locations (at home, at school/college, at work, other locations), from when you woke up to when you went to sleep.

- A contact is defined as:
  - EITHER a **two-way conversation** with three or more words in the physical presence of another person,
  - OR physical **skin-to-skin contact** (for example a handshake, hug, kiss or contact sports).
- Think about every person that you contacted during the day, regardless of whether the contact was long or short, and whether you knew the person or not.
- Contacts made exclusively by telephone or mobile phone should NOT be recorded.
- If you contacted the same person in different locations in the course of the day, only count him/her once, and assign him/her to the location where you two had the contact of longer duration.
  - **Example:** Anne runs a family business together with her husband Tom. Anne and Tom saw each other yesterday both at home and at work. Since they spent more time together at home than at work, Anne will count the contact with Tom as a home contact, and not a work contact.
- If you had no contacts in a given location, please enter 0.

How many persons did you have contacts with yesterday ...

\*... at home?

- Number of people:
- Prefer not to answer

\*... at school/college?

- Number of people:
- Not applicable (e.g. you do not attend any school)
- Prefer not to answer

\*... at work?

(at your workplace or throughout the course of your daily job activity, such as meeting customers or clients)

- Number of people:
- Not applicable (e.g. you do not work)
- Prefer not to answer

\*... in other settings?

(e.g. during transportation and commuting, social and leisure activities, religious services, shopping, or other activities)

- Number of people:
- Prefer not to answer

**Fig. S1.** CHBS questions on daily social contacts.



## Additional figures

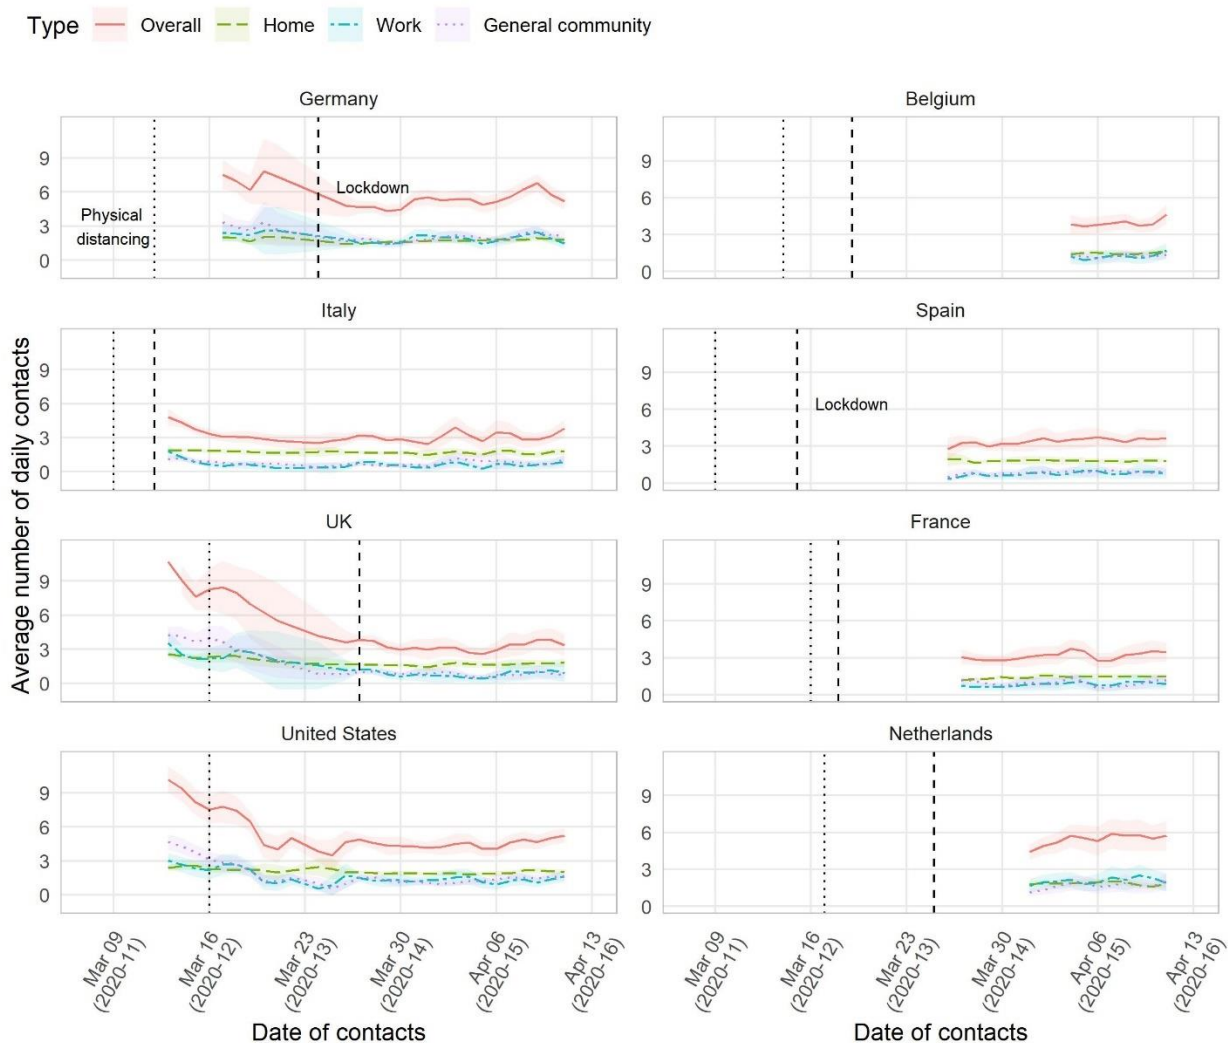

**Fig. S2.** Mean overall number of daily social contacts (with 95% CI), smoothed by a simple two-day moving average, by country and study day. The dotted line corresponds to the date in which the physical distancing guidelines were introduced at the national level; the dashed line corresponds to the date in which the lockdown, regardless of being full or partial, was ordered. Respondents with contacts above the  $\leq 29$  threshold were removed from the analysis.

We performed a sensitivity analysis of the threshold chosen to curtail the right tail of the distribution of social contacts, in response to the extremely high values reported by some of the participants. In the following figures and tables, we present the results of the analysis using a fixed cut-off point at 29 contacts per day, removing respondents reporting 30 contacts per day or more in each of the settings.

Two features of the highly skewed distribution of the overall social contacts (Fig. S2) are worth noting. First, we found that the percentages of participants who reported having fewer than one contact per day were relatively high, at more than 35% in all countries except for Germany, the Netherlands, and the US. Second, the distribution was characterized by a long right tail, the length of which depended on the threshold used to remove the outliers at the top of the distribution (Tables S9-S16).

A

Excluding daily contact numbers above the 90% quantile

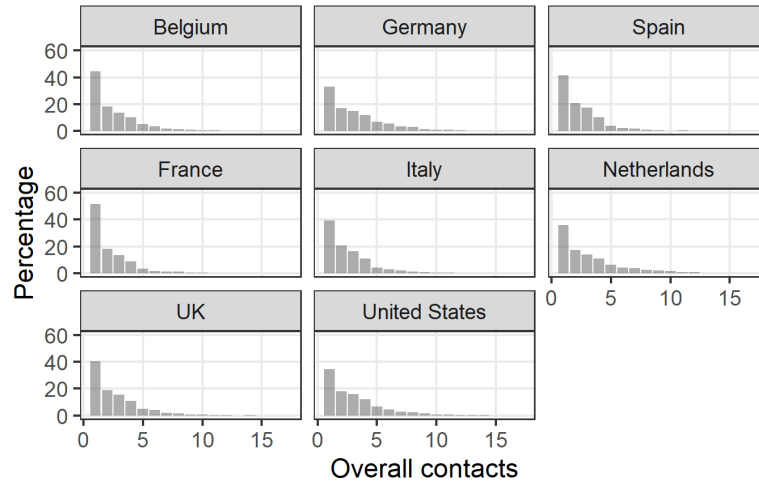

B

Excluding daily contact numbers above 29

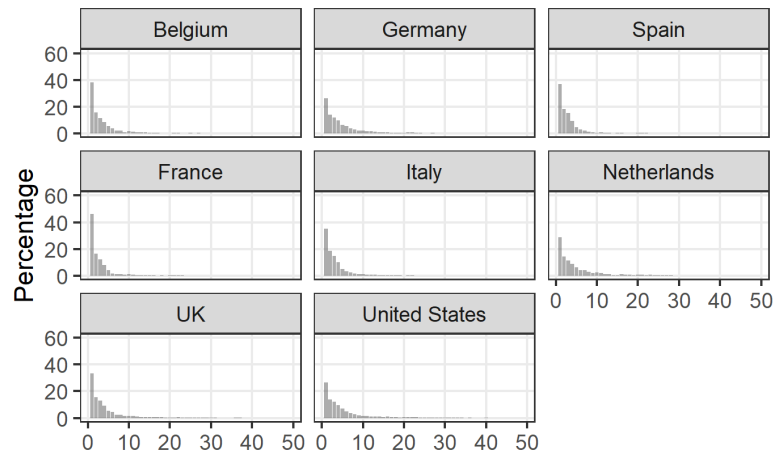

**Fig. S3.** Histogram with the weighted distribution of the overall number of contacts by country. All contacts exclude the top 10% (A) and those equal to 30 or more (B).

In Figures S4-S5, we showed the evolution of the weekly average number of contacts, overall and by setting, after applying the post-stratification weights, under the two threshold scenarios.

Home contacts (which show little variability over the weeks) are the main component of the overall number of contacts, followed by contacts in the general community and at work. Eventually, the contacts at school, which are reduced to zero due to the closure of secondary schools and university/colleges in every surveyed country.

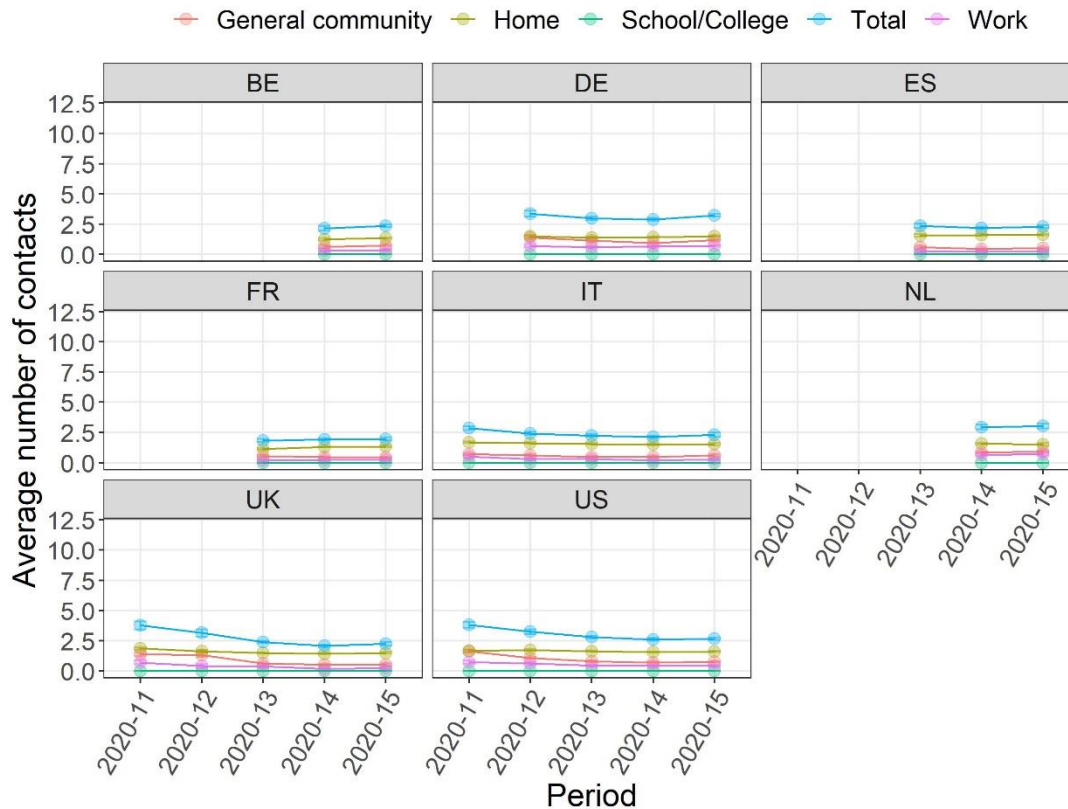

**Fig. S4.** Average number of daily social contacts, overall and by setting, per week and country. Respondents with contacts above the 90% quantile threshold were removed from the analysis.

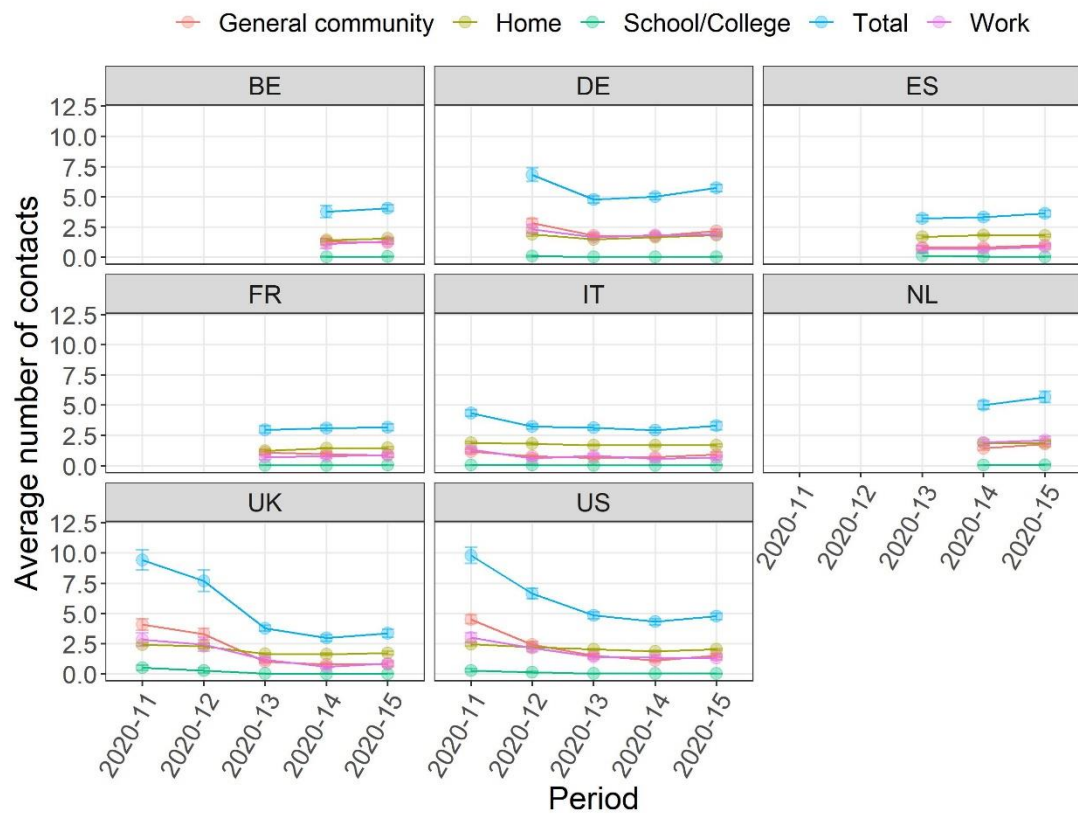

**Fig. S5.** Average number of daily social contacts, overall and by setting, per week and country. Respondents with contacts above the  $\leq 29$  threshold were removed from the analysis.

Fig. S6 shows the consistency of the household size and the number of home contacts under the two thresholds. More than half of respondents lived either alone or with another person. Respondents living in large households, with five members or more, were more frequent in the US (above 10%). Home contacts ranged between around half a contact per day, reported by people living alone, to three contacts per day or more, reported by people living in households of four or more components, regardless of the threshold.

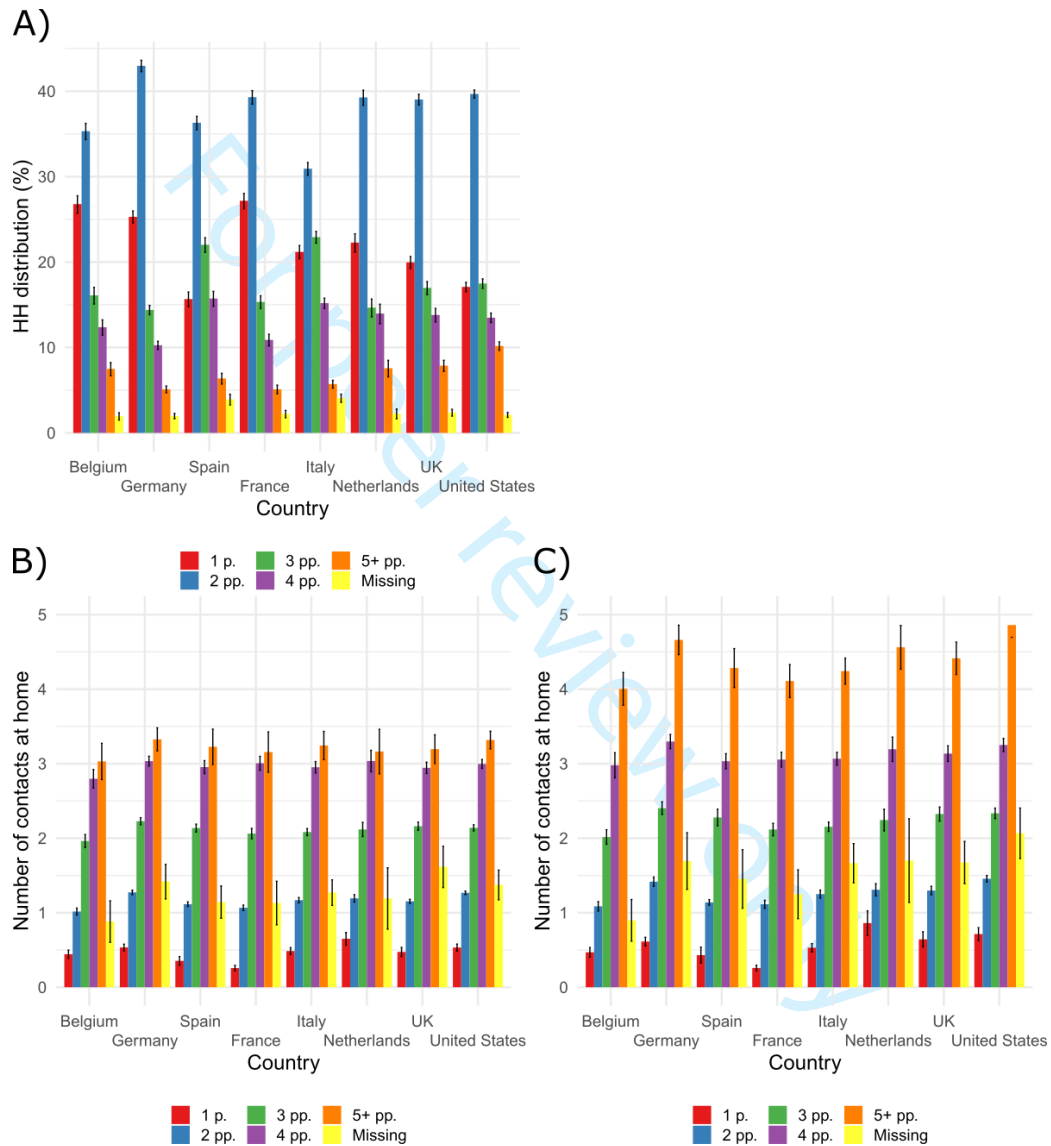

**Fig. S6.** Household size distribution by country (A), compared to the average number of contacts at home by household size and country, under the 90% quantile threshold (B), and under the  $\leq 29$  threshold.

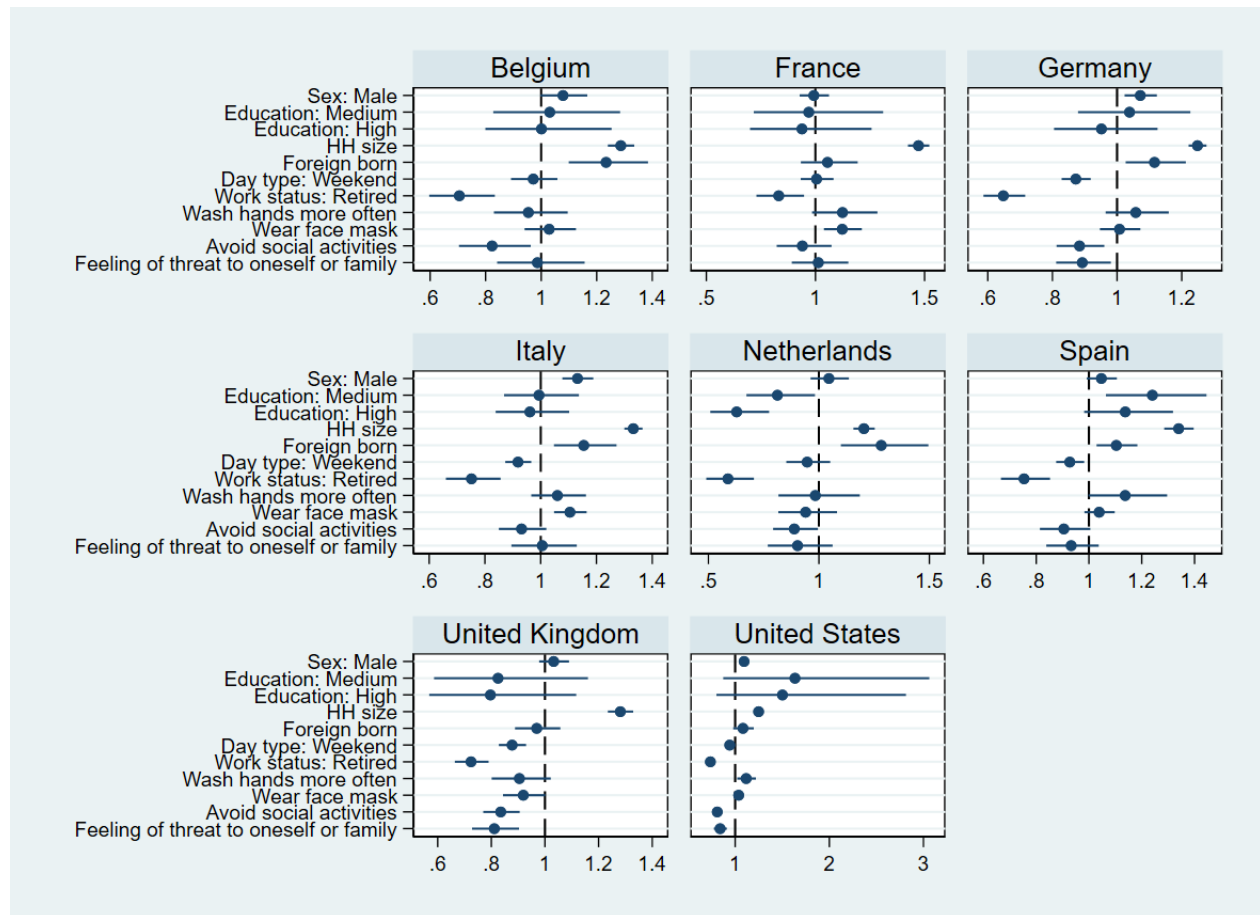

**Fig. S7.** Exponentiated coefficients (with 95% confidence interval) for the socio-demographic and behavioural variables included in the negative binomial regression model for the number of overall daily contacts reported by participants in each country. Respondents with contacts above the 90% quantile threshold were removed from the analysis.

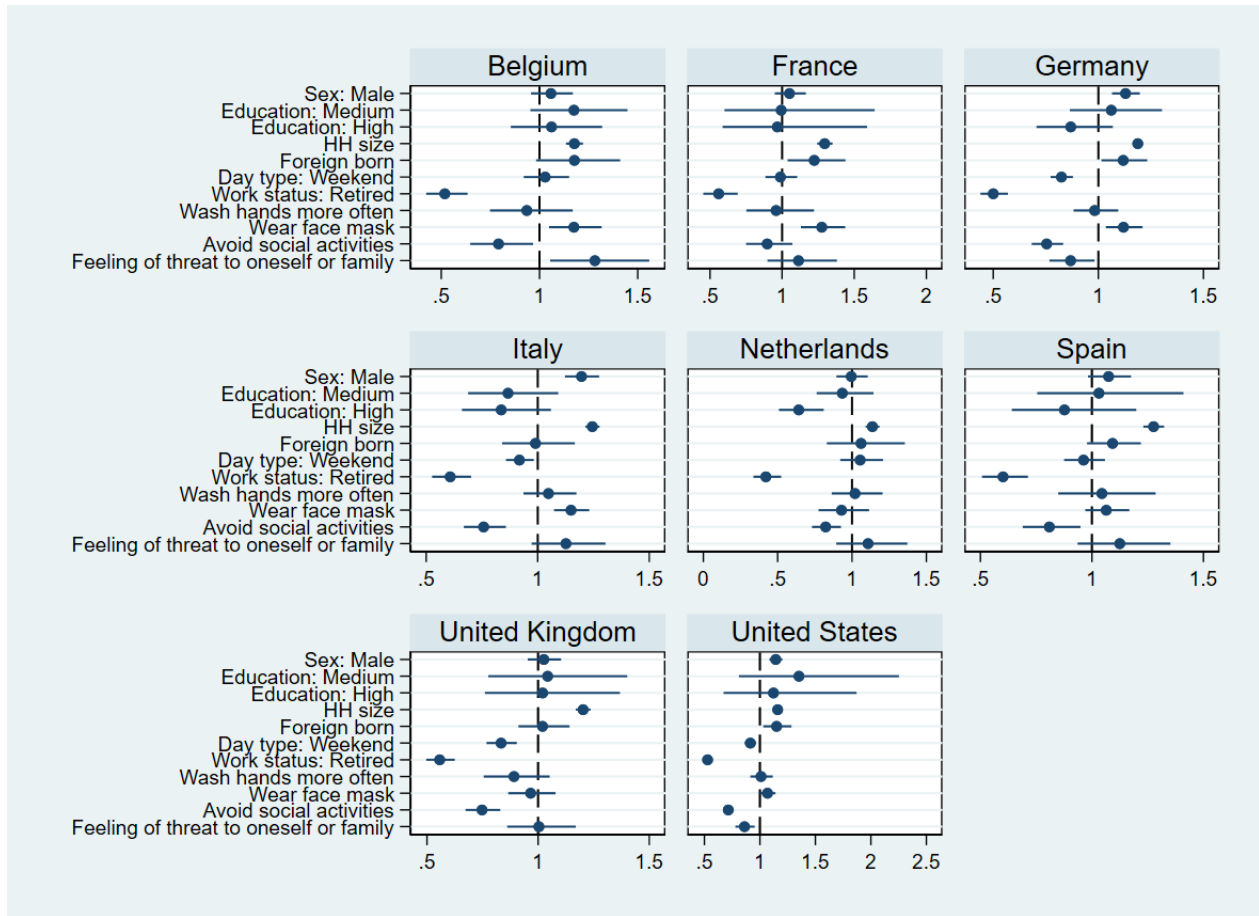

**Fig. S8.** Exponentiated coefficients (with 95% confidence interval) for the socio-demographic and behavioural variables included in the negative binomial regression model for the number of overall daily contacts reported by participants in each country. Respondents with contacts above the  $\leq 29$  threshold were removed from the analysis.

(A)

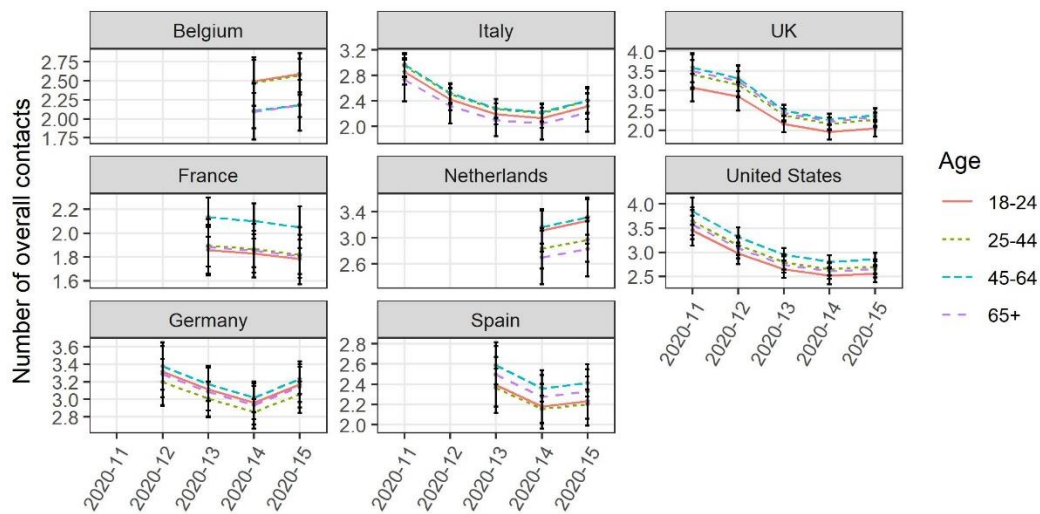

(B)

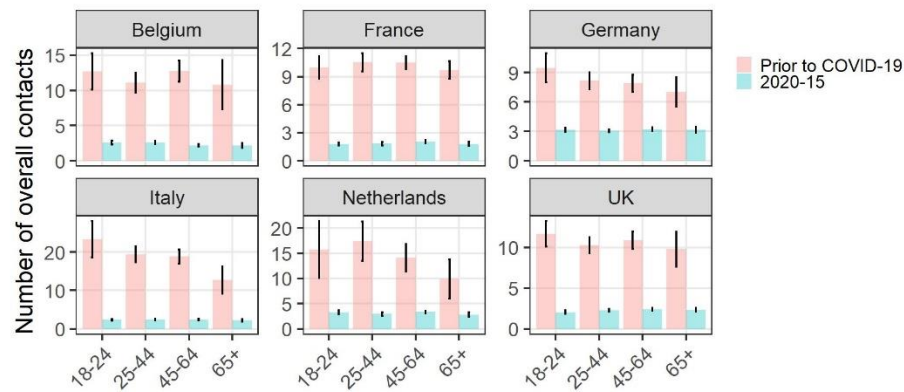

**Fig. S9.** Model-predicted daily number of overall social contacts, by age group, country, and week, March-April 2020. (A). Comparison of model-predicted overall contact numbers between the pre-COVID period and calendar week 2020-15, by country (B). Respondents with contacts above the 90% quantile threshold were removed from the analysis.



(A)

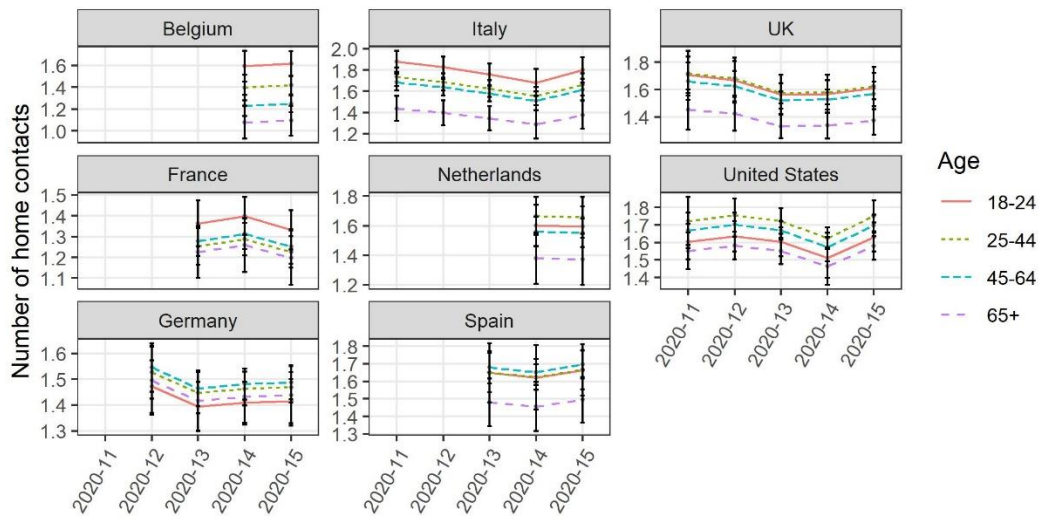

(B)

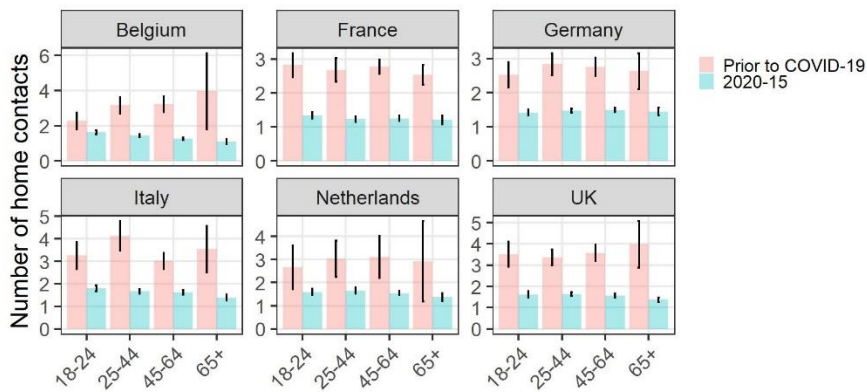

**Fig. S10.** Model-predicted daily number of social contacts at home, by age group, country, and week, March-April 2020. (A). Comparison of model-predicted overall contact numbers between the pre-COVID period and calendar week 2020-15, by country (B). Respondents with contacts above the 90% quantile threshold were removed from the analysis.

(A)

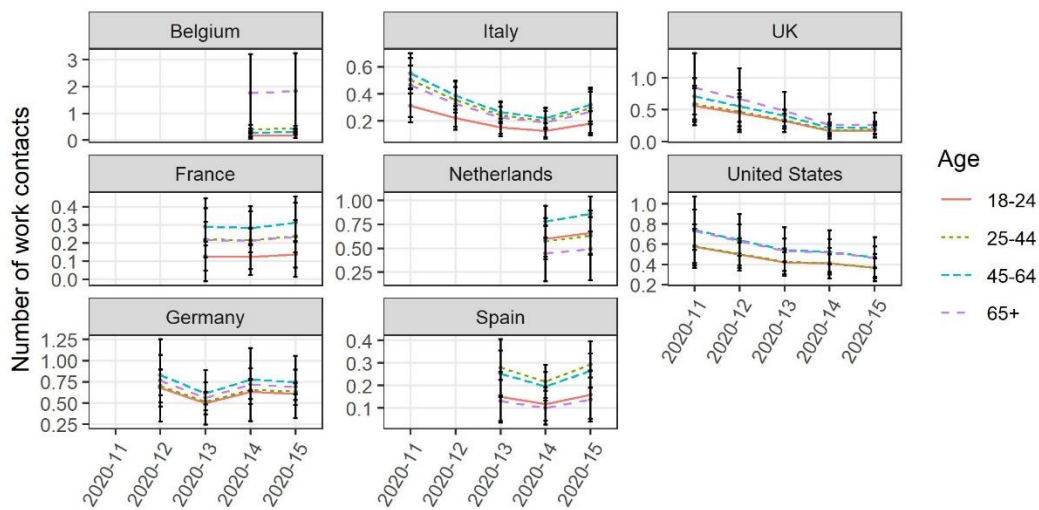

(B)

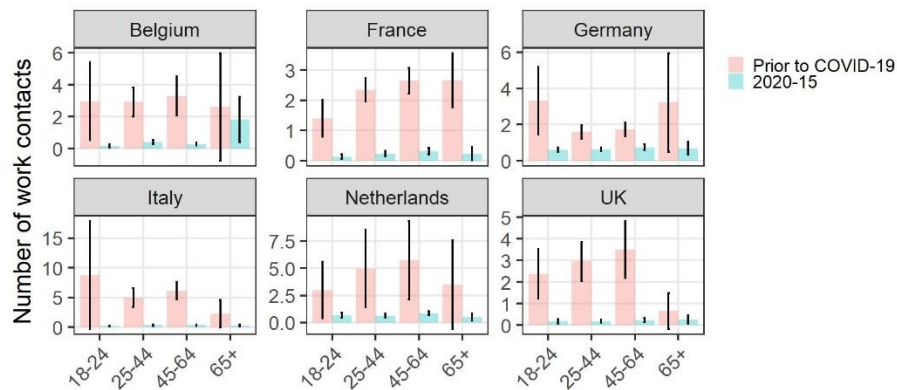

**Fig. S11.** Model-predicted daily number of social contacts at work, by age group, country, and week, March-April 2020. (A). Comparison of model-predicted contact numbers at work between the pre-COVID period and calendar week 2020-15, by country (B). Respondents with contacts above the 90% quantile threshold were removed from the analysis.

(A)

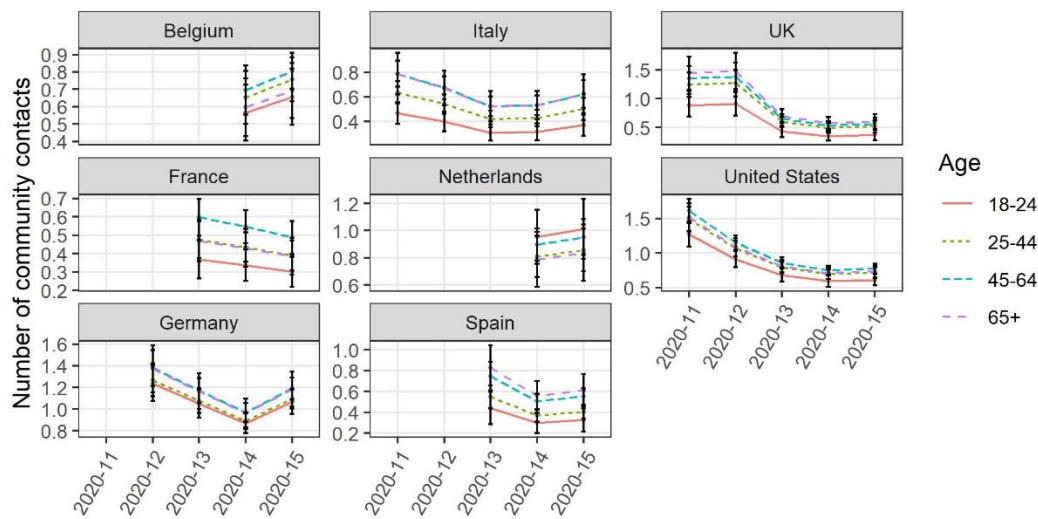

(B)

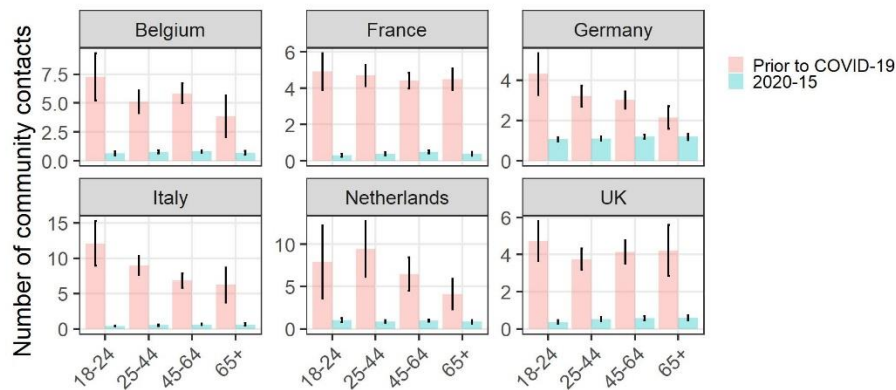

**Fig. S12.** Model-predicted daily number of social contacts in the general community, by age group, country, and week, March-April 2020. (A). Comparison of model-predicted contact numbers in the general community between the pre-COVID period and calendar week 2020-15, by country (B). Respondents with contacts above the 90% quantile threshold were removed from the analysis.

(A)

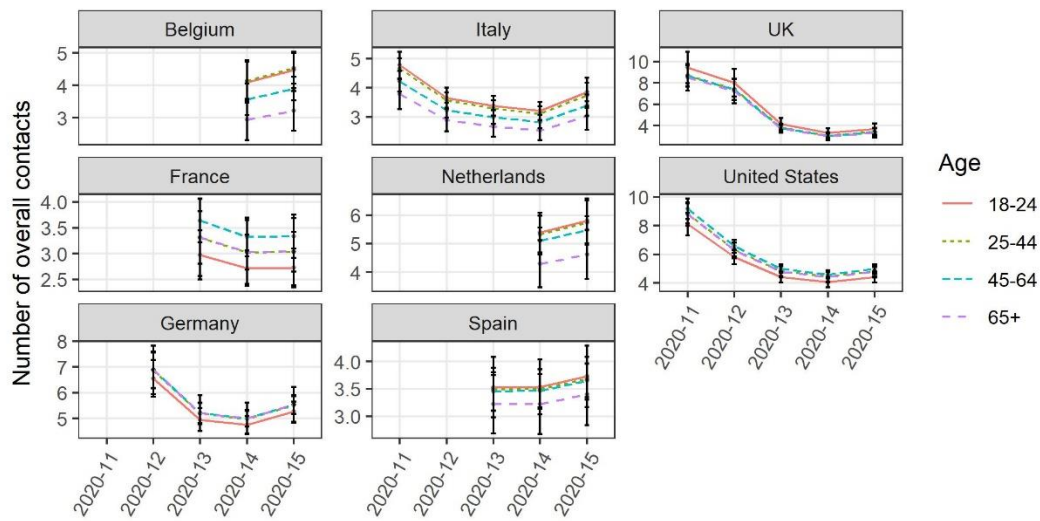

(B)

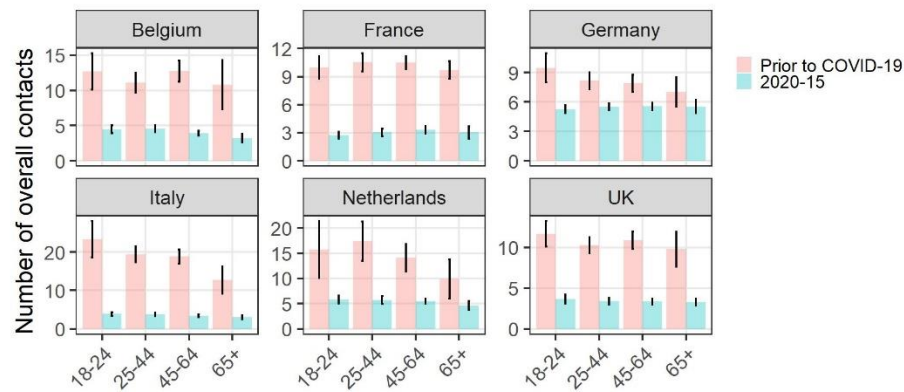

**Fig. S13.** Model-predicted daily number of overall social contacts, by age group, country, and week, March-April 2020. (A). Comparison of model-predicted overall contact numbers between the pre-COVID period and calendar week 2020-15, by country (B). Respondents with contacts above the  $\leq 29$  threshold were removed from the analysis.

(A)

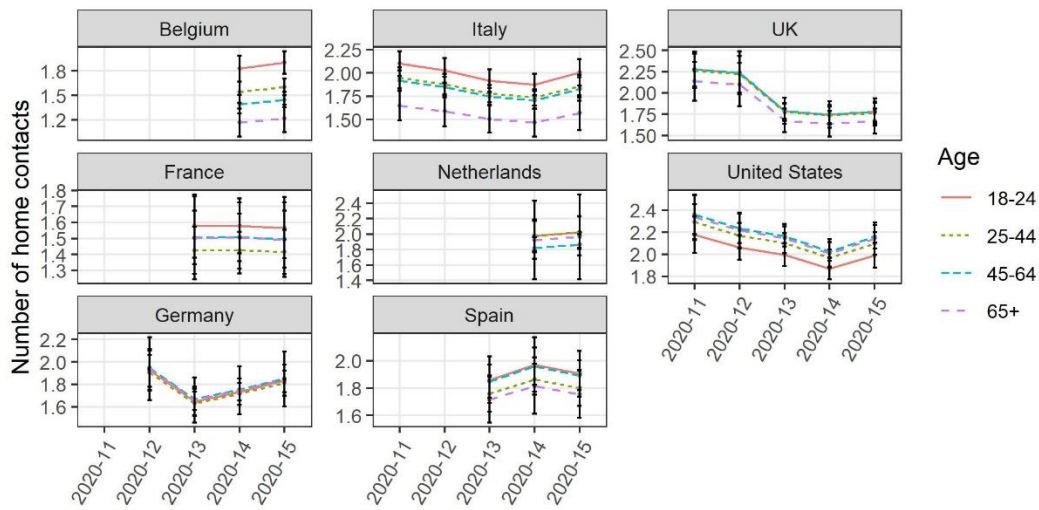

(B)

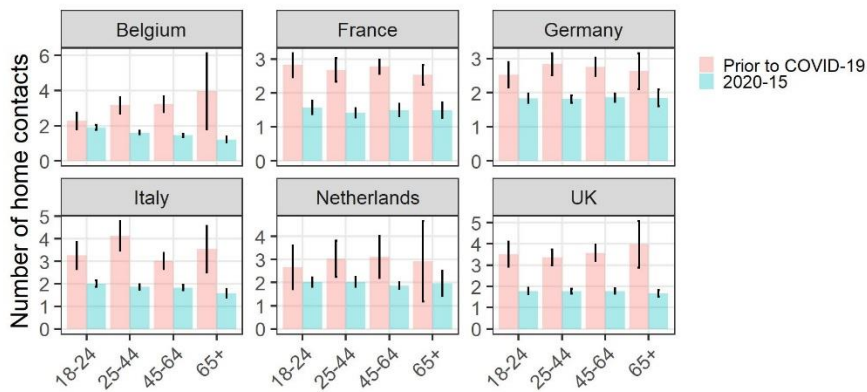

**Fig. S14.** Model-predicted daily number of social contacts at home, by age group, country, and week, March-April 2020. (A). Comparison of model-predicted contact numbers at work between the pre-COVID period and calendar week 2020-15, by country (B). Respondents with contacts above the  $\leq 29$  threshold were removed from the analysis.

(A)

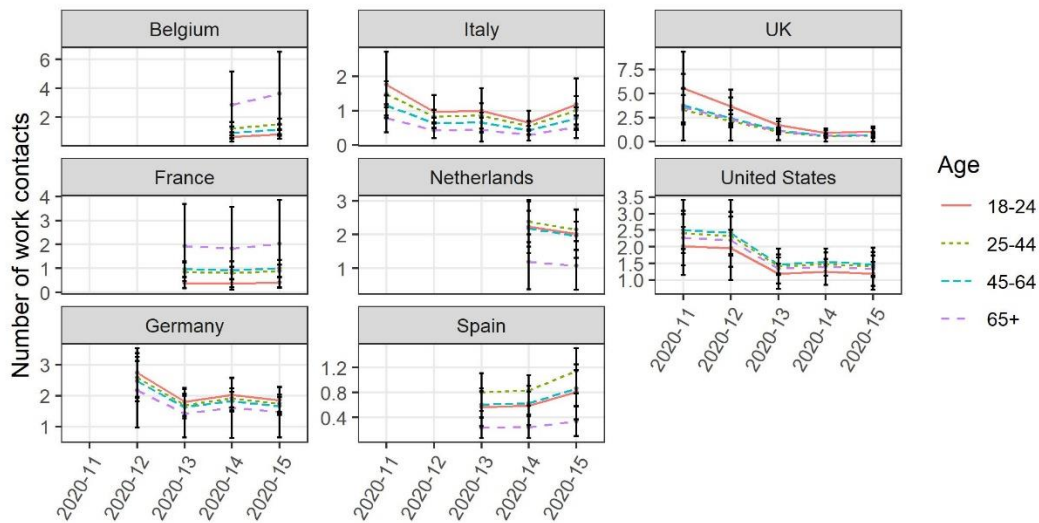

(B)

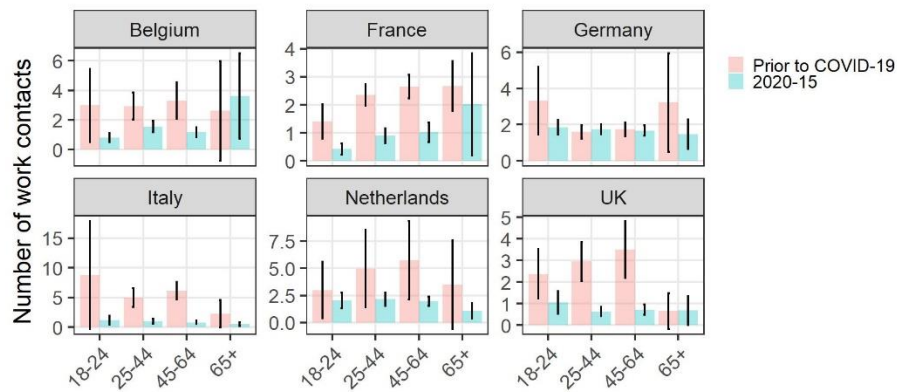

**Fig. S15.** Model-predicted daily number of social contacts at work, by age group, country, and week, March-April 2020. (A). Comparison of model-predicted contact numbers at work between the pre-COVID period and calendar week 2020-15, by country (B). Respondents with contacts above the  $\leq 29$  threshold were removed from the analysis.

(A)

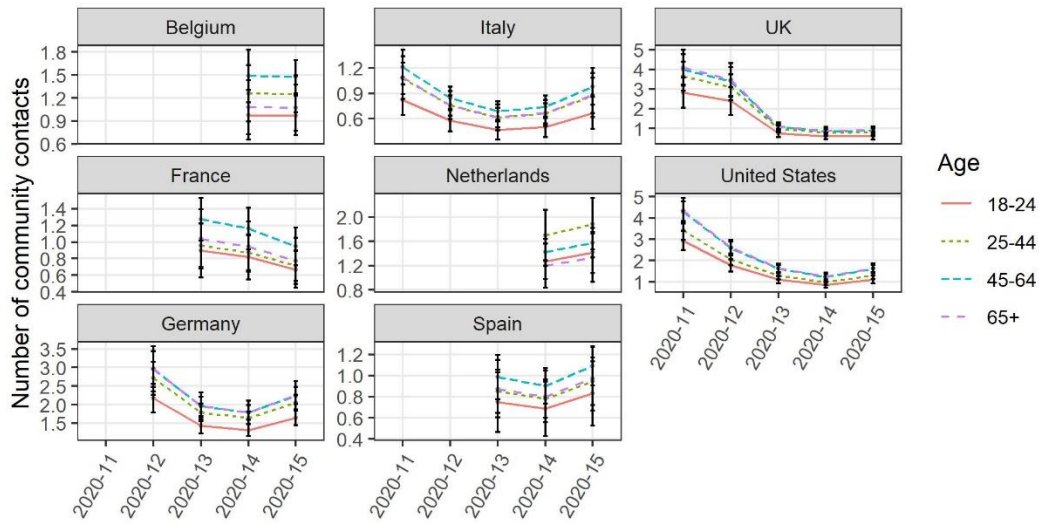

(B)

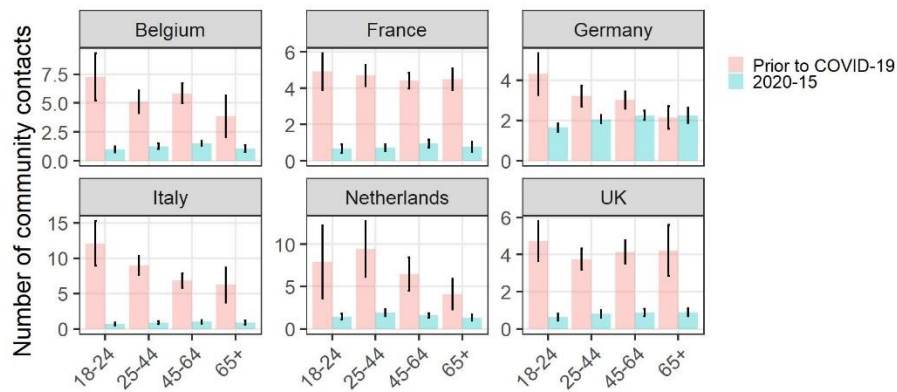

**Fig. S16.** Model-predicted daily number of social contacts in the general community, by age group, country, and week, March-April 2020. (A). Comparison of model-predicted contact numbers in the general community between the pre-COVID period and calendar week 2020-15, by country (B). Respondents with contacts above the  $\leq 29$  threshold were removed from the analysis.

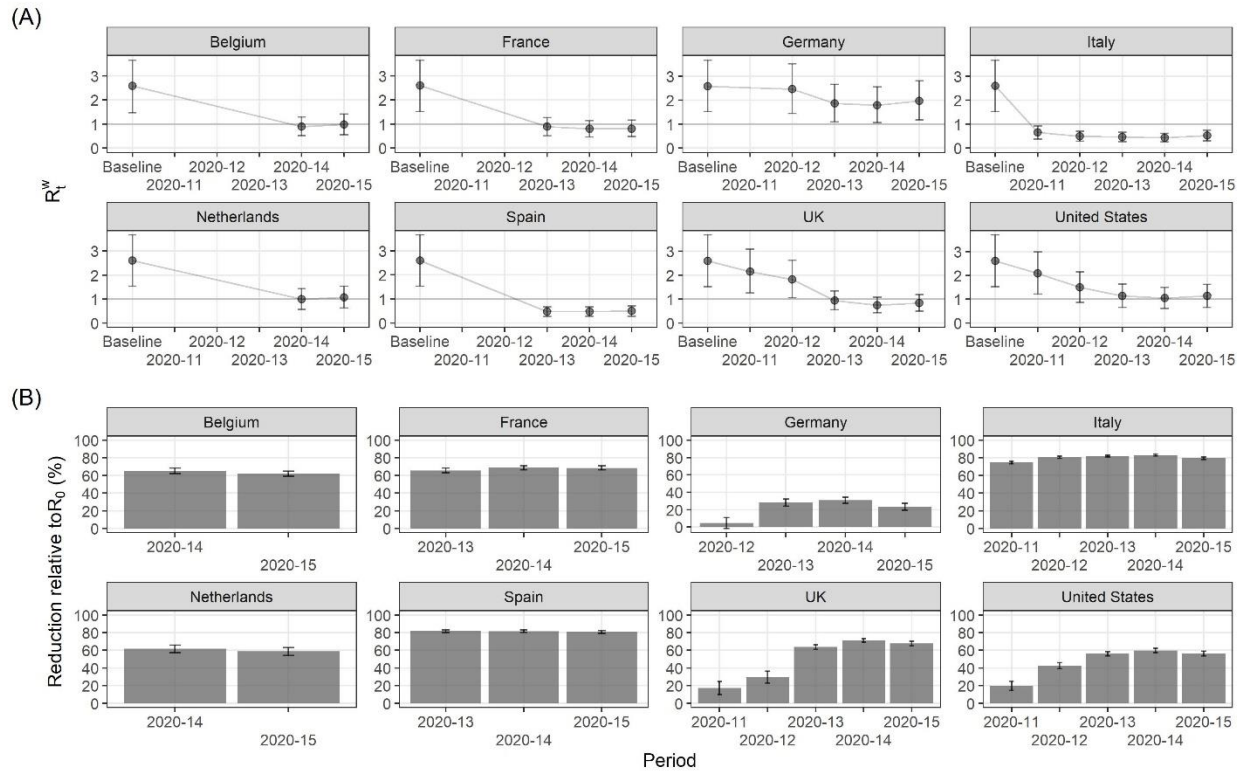

**Fig. S17.** Absolute change in the weekly net reproduction number  $R_t^w$  with respect to the basic reproduction number  $R_0$  at baseline (A) and percent reduction with respect to  $R_0$  (B), by country and calendar week. The 95% CIs are based on 5,000 replicates. Respondents with contacts above the  $\leq 29$  threshold were removed from the analysis.



## Additional tables

### Comparison between the raw and the weighted samples

In Tables S1-S8, for each country, we describe participants in terms of the variables used for the stratification and the construction of the Facebook advertising campaigns, comparing the unweighted sample to the weighted sample, and to the overall population.

We found that, in all countries, women were overrepresented in the sample. Moreover, respondents were more uniformly spread across regions than in the real population. Finally, no trend in terms of age was found when comparing the raw and the adjusted sample distributions. We also noted that the unweighted sample size for the 65+ age group (who are at higher risk of death from COVID-19 [21], and who usually have lower social media participation rates [22]) was fairly large, with the Netherlands, UK, and the US showing higher percentages than in the population.

**Table S1.** Characteristics of survey participants in Belgium (N=3504), by region of residence, age group, and sex. We compare the raw sample (“unweighted”) to the sample adjusted with the post-stratification weights (“weighted”), and to the distribution of each stratum in the population.

| Variable         | Category        | Unweighted |       | Weighted |       | Population |
|------------------|-----------------|------------|-------|----------|-------|------------|
|                  |                 | N          | %     | N        | %     | %          |
| <b>Region</b>    | <b>Brussels</b> | 605        | 17.3% | 359      | 10.3% | 10.3%      |
|                  | <b>Flanders</b> | 1329       | 37.9% | 2033     | 58.0% | 58.0%      |
|                  | <b>Wallonia</b> | 1570       | 44.8% | 1112     | 31.7% | 31.7%      |
| <b>Age group</b> | <b>18-24</b>    | 623        | 17.8% | 479      | 13.7% | 13.7%      |
|                  | <b>25-44</b>    | 1075       | 30.7% | 1092     | 31.2% | 31.2%      |
|                  | <b>45-64</b>    | 1172       | 33.5% | 1135     | 32.4% | 32.4%      |
|                  | <b>65+</b>      | 634        | 18.1% | 797      | 22.8% | 22.8%      |
| <b>Sex</b>       | <b>Female</b>   | 2395       | 68.4% | 1791     | 51.1% | 51.1%      |
|                  | <b>Male</b>     | 1109       | 31.7% | 1713     | 48.9% | 48.9%      |

**Table S2.** Characteristics of survey participants in Germany (N=8135), by region of residence, age group, and sex. We compare the raw sample (“unweighted”) to the sample adjusted with the post-stratification weights (“weighted”), and to the distribution of each stratum in the population.

| Variable         | Category      | Unweighted |       | Weighted |       | Population |
|------------------|---------------|------------|-------|----------|-------|------------|
|                  |               | N          | %     | N        | %     | %          |
| <b>Region*</b>   | <b>East</b>   | 1996       | 24.5% | 1436     | 17.7% | 17.7%      |
|                  | <b>North</b>  | 1871       | 23.0% | 1472     | 18.1% | 18.1%      |
|                  | <b>South</b>  | 36         | 25.0% | 2362     | 29.0% |            |
|                  | <b>West</b>   | 2232       | 27.4% | 2865     | 35.2% | 35.2%      |
| <b>Age group</b> | <b>18-24</b>  | 1764       | 21.7% | 977      | 12.0% | 12.0%      |
|                  | <b>25-44</b>  | 3142       | 38.6% | 2346     | 28.8% | 28.8%      |
|                  | <b>45-64</b>  | 2144       | 26.4% | 2785     | 34.2% | 34.2%      |
|                  | <b>65+</b>    | 1085       | 13.3% | 2028     | 24.9% | 24.9%      |
| <b>Sex</b>       | <b>Female</b> | 5149       | 63.3% | 4147     | 51.0% | 51.0%      |
|                  | <b>Male</b>   | 2986       | 36.7% | 3988     | 49.0% | 49.0%      |

\* The “East” region includes Berlin, Brandenburg, Sachsen, Sachsen-Anhalt, and Thüringen; the “North” regions includes Bremen, Hamburg, Mecklenburg-Vorpommern, Niedersachsen, and Schleswig-Holstein; the “South” region includes Baden-Württemberg and Bayern; the “West” region includes Hessen, Nordrhein-Westfalen, Rheinland-Pfalz, and Saarland.

**Table S3.** Characteristics of survey participants in Spain (N=4965), by region of residence, age group, and sex. We compare the raw sample (“unweighted”) to the sample adjusted with the post-stratification weights (“weighted”), and to the distribution of each stratum in the population.

| Variable         | Category         | Unweighted |       | Weighted |       | Population |
|------------------|------------------|------------|-------|----------|-------|------------|
|                  |                  | N          | %     | N        | %     | %          |
| <b>Region*</b>   | <b>Central</b>   | 608        | 12.3% | 592      | 11.9% | 11.9%      |
|                  | <b>East</b>      | 1166       | 23.5% | 1444     | 29.1% | 29.1%      |
|                  | <b>Insular</b>   | 387        | 7.8%  | 238      | 4.8%  | 4.8%       |
|                  | <b>Madrid</b>    | 774        | 15.6% | 697      | 14.0% | 14.0%      |
|                  | <b>Northeast</b> | 569        | 11.5% | 474      | 9.6%  | 9.6%       |
|                  | <b>Northwest</b> | 690        | 13.9% | 471      | 9.5%  | 9.5%       |
|                  | <b>South</b>     | 771        | 15.5% | 1049     | 21.1% | 21.1%      |
| <b>Age group</b> | <b>18-24</b>     | 392        | 7.9%  | 573      | 11.6% | 11.6%      |
|                  | <b>25-44</b>     | 1858       | 37.4% | 1582     | 31.9% | 31.9%      |
|                  | <b>45-64</b>     | 2016       | 40.6% | 1680     | 33.8% | 33.8%      |
|                  | <b>65+</b>       | 699        | 14.1% | 1130     | 22.8% | 22.8%      |
| <b>Sex</b>       | <b>Female</b>    | 3490       | 70.3% | 2553     | 51.4% | 51.4%      |
|                  | <b>Male</b>      | 1475       | 29.7% | 2412     | 48.6% | 48.6%      |

\* The region “Central” includes Castilla y León, Castilla-la Mancha, and Extremadura; the region “East” includes Cataluña, Comunidad Valenciana, and Illes Balears; the region “Insular” includes Canarias; the region “Northeast” includes País Vasco, Comunidad Foral de Navarra, La Rioja, and Aragón; the region “Northwest” includes Galicia, Principado de Asturias, and Cantabria; the region “South” includes Andalucía, Región de Murcia, Ciudad Autónoma de Ceuta, and Ciudad Autónoma de Melilla.

**Table S4.** Characteristics of survey participants in France (N=4637), by region of residence, age group, and sex. We compare the raw sample (“unweighted”) to the sample adjusted with the post-stratification weights (“weighted”), and to the distribution of each stratum in the population.

| Variable         | Category             | Unweighted |       | Weighted |       | Population |
|------------------|----------------------|------------|-------|----------|-------|------------|
|                  |                      | N          | %     | N        | %     | %          |
| <b>Region</b>    | <b>Île de France</b> | 678        | 14.6% | 862      | 18.6% | 18.5%      |
|                  | <b>Northeast</b>     | 971        | 20.9% | 1027     | 22.2% | 22.0%      |
|                  | <b>Southeast</b>     | 978        | 21.1% | 941      | 20.3% | 20.2%      |
|                  | <b>Southwest</b>     | 994        | 21.4% | 871      | 18.8% | 18.7%      |
|                  | <b>West</b>          | 1016       | 21.9% | 936      | 20.2% | 20.1%      |
| <b>Age group</b> | <b>18-24</b>         | 818        | 17.6% | 660      | 14.2% | 14.2%      |
|                  | <b>25-44</b>         | 1448       | 31.2% | 1365     | 29.4% | 29.4%      |
|                  | <b>45-64</b>         | 1576       | 34.0% | 1467     | 31.6% | 31.6%      |
|                  | <b>65</b>            | 795        | 17.1% | 1146     | 24.7% | 24.7%      |
| <b>Sex</b>       | <b>Female</b>        | 3300       | 71.2% | 2422     | 52.2% | 52.2%      |
|                  | <b>Male</b>          | 1337       | 28.8% | 2215     | 47.8% | 47.8%      |

\* The region “Northeast” includes Bourgogne - Franche-Comté, Nord-Pas-de-Calais – Picardie, and Alsace - Champagne-Ardenne – Lorraine; the region “Southeast” includes Auvergne - Rhône-Alpes, Provence-Alpes-Côte d'Azur, and Corse; the region “Southwest” includes Aquitaine - Limousin - Poitou-Charentes, and Languedoc-Roussillon - Midi-Pyrénées; the region “West” includes Centre - Val de Loire, Normandie, Pays-de-la-Loire, and Bretagne.

**Table S5.** Characteristics of survey participants in Italy (N=7532), by region of residence, age group, and sex. We compare the raw sample (“unweighted”) to the sample adjusted with the post-stratification weights (“weighted”), and to the distribution of each stratum in the population.

| Variable         | Category         | Unweighted |       | Weighted |       | Population |
|------------------|------------------|------------|-------|----------|-------|------------|
|                  |                  | N          | %     | N        | %     | %          |
| <b>Region*</b>   | <b>Central</b>   | 1605       | 21.3% | 1504     | 20.0% | 20.0%      |
|                  | <b>Insular</b>   | 795        | 10.6% | 829      | 11.0% | 11.0%      |
|                  | <b>Northeast</b> | 1885       | 25.0% | 1453     | 19.3% | 19.3%      |
|                  | <b>Northwest</b> | 2257       | 30.0% | 2011     | 26.7% | 26.7%      |
|                  | <b>South</b>     | 990        | 13.1% | 1735     | 23.0% | 23.0%      |
| <b>Age group</b> | <b>18-24</b>     | 1550       | 20.6% | 846      | 11.2% | 11.2%      |
|                  | <b>25-44</b>     | 3083       | 40.9% | 2114     | 28.1% | 28.1%      |
|                  | <b>45-64</b>     | 2034       | 27.0% | 2591     | 34.4% | 34.4%      |
|                  | <b>65+</b>       | 865        | 11.5% | 1981     | 26.3% | 26.3%      |
| <b>Sex</b>       | <b>Female</b>    | 4905       | 65.1% | 3897     | 51.7% | 51.7%      |
|                  | <b>Male</b>      | 2627       | 34.9% | 3635     | 48.3% | 48.3%      |

\* The region “Central” includes Toscana, Umbria, Marche, and Lazio; the region “Insular” includes Sicilia and Sardegna; the region “Northeast” includes Provincia Autonoma di Bolzano/Bozen, Provincia Autonoma di Trento, Veneto, Friuli-Venezia Giulia, and Emilia-Romagna; the region “Northwest” includes Piemonte, Valle d'Aosta/Vallée d'Aoste, Liguria, and Lombardia; the region “South” includes Abruzzo, Molise, Campania, Puglia, Basilicata, and Calabria.

**Table S6.** Characteristics of survey participants in the Netherlands (N=3172), by region of residence, age group, and sex. We compare the raw sample (“unweighted”) to the sample adjusted with the post-stratification weights (“weighted”), and to the distribution of each stratum in the population.

| Variable         | Category      | Unweighted |       | Weighted |       | Population |
|------------------|---------------|------------|-------|----------|-------|------------|
|                  |               | N          | %     | N        | %     | %          |
| <b>Region*</b>   | <b>East</b>   | 793        | 25.0% | 664      | 20.9% | 20.9%      |
|                  | <b>North</b>  | 654        | 20.6% | 319      | 10.1% | 10.1%      |
|                  | <b>South</b>  | 802        | 25.3% | 682      | 21.5% | 21.5%      |
|                  | <b>West</b>   | 923        | 29.1% | 1506     | 47.5% | 47.5%      |
| <b>Age group</b> | <b>18-24</b>  | 447        | 14.1% | 465      | 14.7% | 14.7%      |
|                  | <b>25-44</b>  | 793        | 25.0% | 928      | 29.3% | 29.3%      |
|                  | <b>45-64</b>  | 1191       | 37.6% | 1056     | 33.3% | 33.3%      |
|                  | <b>65+</b>    | 741        | 23.4% | 723      | 22.8% | 22.8%      |
| <b>Sex</b>       | <b>Female</b> | 2134       | 67.3% | 1606     | 50.6% | 50.6%      |
|                  | <b>Male</b>   | 1038       | 32.7% | 1566     | 49.4% | 49.4%      |

\* The region “East” includes Overijssel, Gelderland, and Flevoland; the region “North” includes Groningen, Friesland, and Drenthe; the region “South” includes Noord-Brabant and Limburg; the region “West” includes Utrecht, Noord-Holland, Zuid-Holland, and Zeeland.

**Table S7.** Characteristics of survey participants in the United Kingdom (N=7371), by region of residence, age group, and sex. We compare the raw sample (“unweighted”) to the sample adjusted with the post-stratification weights (“weighted”), and to the distribution of each stratum in the population.

| Variable         | Category                | Unweighted |       | Weighted |       | Population |
|------------------|-------------------------|------------|-------|----------|-------|------------|
|                  |                         | N          | %     | N        | %     | %          |
| <b>Region</b>    | <b>England</b>          | 3381       | 45.9% | 5225     | 70.9% | 70.9%      |
|                  | <b>London</b>           | 763        | 10.4% | 974      | 13.2% | 13.2%      |
|                  | <b>Northern Ireland</b> | 547        | 7.4%  | 203      | 2.8%  | 2.8%       |
|                  | <b>Scotland</b>         | 1548       | 21.0% | 618      | 8.4%  | 8.4%       |
|                  | <b>Wales</b>            | 1132       | 15.4% | 351      | 4.8%  | 4.8%       |
| <b>Age group</b> | <b>18-24</b>            | 577        | 7.8%  | 1056     | 14.3% | 14.3%      |
|                  | <b>25-44</b>            | 1831       | 24.8% | 2346     | 31.8% | 31.8%      |
|                  | <b>45-64</b>            | 3044       | 41.3% | 2316     | 31.4% | 31.4%      |
|                  | <b>65+</b>              | 1919       | 26.0% | 1653     | 22.4% | 22.4%      |
| <b>Sex</b>       | <b>Female</b>           | 4789       | 65.0% | 3762     | 51.0% | 51.0%      |
|                  | <b>Male</b>             | 2582       | 35.0% | 3609     | 49.0% | 49.0%      |

**Table S8.** Characteristics of survey participants in the United States (N=11917), by region of residence, age group, and sex. We compare the raw sample (“unweighted”) to the sample adjusted with the post-stratification weights (“weighted”), and to the distribution of each stratum in the population.

| Variable         | Category         | Unweighted |       | Weighted |       | Population |
|------------------|------------------|------------|-------|----------|-------|------------|
|                  |                  | N          | %     | N        | %     | %          |
| <b>Region*</b>   | <b>Midwest</b>   | 3206       | 26.9% | 2490     | 20.9% | 20.9%      |
|                  | <b>Northeast</b> | 2673       | 22.4% | 2088     | 17.5% | 17.5%      |
|                  | <b>South</b>     | 2950       | 24.8% | 4507     | 37.8% | 37.8%      |
|                  | <b>West</b>      | 3088       | 25.9% | 2832     | 23.8% | 23.8%      |
| <b>Age group</b> | <b>18-24</b>     | 1308       | 11.0% | 1923     | 16.1% | 16.1%      |
|                  | <b>25-44</b>     | 3227       | 27.1% | 3889     | 32.6% | 32.6%      |
|                  | <b>45-64</b>     | 4075       | 34.2% | 3757     | 31.5% | 31.5%      |
|                  | <b>65+</b>       | 3307       | 27.8% | 2348     | 19.7% | 19.7%      |
| <b>Sex</b>       | <b>Female</b>    | 7900       | 66.3% | 6098     | 51.2% | 51.2%      |
|                  | <b>Male</b>      | 4017       | 33.7% | 5819     | 48.8% | 48.8%      |

\* The region “Midwest” includes Illinois, Indiana, Iowa, Kansas, Michigan, Minnesota, Missouri, Nebraska, North Dakota, Ohio, South Dakota, and Wisconsin; the region “Northeast” includes Connecticut, Maine, Massachusetts, New Hampshire, New Jersey, New York, Pennsylvania, Rhode Island, and Vermont; the region “South” includes Alabama, Arkansas, Delaware, Florida, Georgia, Kentucky, Louisiana, Maryland, Mississippi, North Carolina, Oklahoma, South Carolina, Tennessee, Texas, Virginia, and West Virginia; the region “West” includes Alaska, Arizona, California, Colorado, Hawaii, Idaho, Montana, Nevada, New Mexico, Oregon, Utah, Washington, and Wyoming.



## Effect for the contact threshold values

Tables S9-S16 compare the contact threshold scenario presented in the manuscript, where individuals who reported more contacts than the 90% quantile of the contact distribution per setting were removed, with the scenario considered in the sensitivity analysis, where individuals who reported 30 or more contacts per setting were removed. For each scenario, we show the minimum, the median, and the first and the third quartile, and the maximum number of contacts for each setting and overall, as well as the number of missing values (either because the participant did not report it or because he or she reported a number of contacts above the considered threshold).

Under the 90% quantile scenario used in the main analysis, the number of missing values (due either to respondents who did not provide any contact number or who reported a number of contacts above the threshold) was much higher than under the  $\leq 29$  scenario. Even though these thresholds might lead to different average contacts numbers, which is a metric not robust to outliers, the effect on the median and the quartiles was much smaller, with differences between the two outliers' scenarios mainly found in Germany, the Netherlands, and the United States for the home contacts (and hence for the overall contacts).

**Table S9.** Contact distribution by threshold in each setting and overall, for Belgium (N=3704).

| Threshold       | Statistic          | Overall | Home | School | Work | General community |
|-----------------|--------------------|---------|------|--------|------|-------------------|
| 90%<br>quantile | Minimum            | 0       | 0    | 0      | 0    | 0                 |
|                 | First quartile     | 1       | 0    | 0      | 0    | 0                 |
|                 | Median             | 2       | 1    | 0      | 0    | 0                 |
|                 | Third quartile     | 3       | 2    | 0      | 0    | 1                 |
|                 | Maximum            | 14      | 4    | 0      | 8    | 5                 |
|                 | No. missing values | 625     | 162  | 52     | 304  | 195               |
| $\leq 29$       | Minimum            | 0       | 0    | 0      | 0    | 0                 |
|                 | First quartile     | 1       | 0    | 0      | 0    | 0                 |
|                 | Median             | 2       | 1    | 0      | 0    | 0                 |
|                 | Third quartile     | 4       | 2    | 0      | 0    | 1                 |
|                 | Maximum            | 45      | 13   | 17     | 26   | 29                |
|                 | No. missing values | 144     | 1    | 2      | 127  | 23                |

**Table S10.** Contact distribution by threshold in each setting and overall, for Germany (N=8135).

| Threshold           | Statistic                 | Overall | Home | School | Work | General community |
|---------------------|---------------------------|---------|------|--------|------|-------------------|
| <b>90% quantile</b> | <b>Minimum</b>            | 0       | 0    | 0      | 0    | 0                 |
|                     | <b>First quartile</b>     | 1       | 1    | 0      | 0    | 0                 |
|                     | <b>Median</b>             | 3       | 1    | 0      | 0    | 0                 |
|                     | <b>Third quartile</b>     | 5       | 2    | 0      | 0    | 2                 |
|                     | <b>Maximum</b>            | 16      | 4    | 0      | 8    | 5                 |
|                     | <b>No. Missing values</b> | 2124    | 490  | 92     | 1154 | 867               |
| <b>≤ 29</b>         | <b>Minimum</b>            | 0       | 0    | 0      | 0    | 0                 |
|                     | <b>First quartile</b>     | 2       | 1    | 0      | 0    | 0                 |
|                     | <b>Median</b>             | 4       | 1    | 0      | 0    | 1                 |
|                     | <b>Third quartile</b>     | 7       | 3    | 0      | 1    | 2                 |
|                     | <b>Maximum</b>            | 61      | 29   | 24     | 28   | 27                |
|                     | <b>No. Missing values</b> | 527     | 14   | 8      | 402  | 167               |

**Table S11.** Contact distribution by threshold in each setting and overall, for Spain (N=4965).

| Threshold           | Statistic                 | Overall | Home | School | Work | General community |
|---------------------|---------------------------|---------|------|--------|------|-------------------|
| <b>90% quantile</b> | <b>Minimum</b>            | 0       | 0    | 0      | 0    | 0                 |
|                     | <b>First quartile</b>     | 1       | 1    | 0      | 0    | 0                 |
|                     | <b>Median</b>             | 2       | 1    | 0      | 0    | 0                 |
|                     | <b>Third quartile</b>     | 3       | 3    | 0      | 0    | 0                 |
|                     | <b>Maximum</b>            | 14      | 4    | 0      | 8    | 5                 |
|                     | <b>No. Missing values</b> | 717     | 193  | 71     | 333  | 229               |
| <b>≤ 29</b>         | <b>Minimum</b>            | 0       | 0    | 0      | 0    | 0                 |
|                     | <b>First quartile</b>     | 1       | 1    | 0      | 0    | 0                 |
|                     | <b>Median</b>             | 2       | 2    | 0      | 0    | 0                 |
|                     | <b>Third quartile</b>     | 4       | 3    | 0      | 0    | 1                 |
|                     | <b>Maximum</b>            | 76      | 28   | 25     | 28   | 25                |
|                     | <b>No. Missing values</b> | 188     | 12   | 6      | 139  | 52                |

**Table S12.** Contact distribution by threshold in each setting and overall, for France (N=4637).

| Threshold           | Statistic                 | Overall | Home | School | Work | General community |
|---------------------|---------------------------|---------|------|--------|------|-------------------|
| <b>90% quantile</b> | <b>Minimum</b>            | 0       | 0    | 0      | 0    | 0                 |
|                     | <b>First quartile</b>     | 1       | 0    | 0      | 0    | 0                 |
|                     | <b>Median</b>             | 2       | 1    | 0      | 0    | 0                 |
|                     | <b>Third quartile</b>     | 3       | 2    | 0      | 0    | 0                 |
|                     | <b>Maximum</b>            | 15      | 4    | 0      | 8    | 5                 |
|                     | <b>No. Missing values</b> | 706     | 159  | 63     | 350  | 246               |
| <b>≤ 29</b>         | <b>Minimum</b>            | 0       | 0    | 0      | 0    | 0                 |
|                     | <b>First quartile</b>     | 1       | 0    | 0      | 0    | 0                 |
|                     | <b>Median</b>             | 2       | 1    | 0      | 0    | 0                 |
|                     | <b>Third quartile</b>     | 4       | 2    | 0      | 0    | 1                 |
|                     | <b>Maximum</b>            | 54      | 18   | 25     | 28   | 25                |
|                     | <b>No. Missing values</b> | 214     | 4    | 7      | 169  | 60                |

**Table S13.** Contact distribution by threshold in each setting and overall, for Italy (N=7532).

| Threshold           | Statistic                 | Overall | Home | School | Work | General community |
|---------------------|---------------------------|---------|------|--------|------|-------------------|
| <b>90% quantile</b> | <b>Minimum</b>            | 0       | 0    | 0      | 0    | 0                 |
|                     | <b>First quartile</b>     | 1       | 1    | 0      | 0    | 0                 |
|                     | <b>Median</b>             | 2       | 2    | 0      | 0    | 0                 |
|                     | <b>Third quartile</b>     | 3       | 3    | 0      | 0    | 0                 |
|                     | <b>Maximum</b>            | 16      | 4    | 0      | 8    | 5                 |
|                     | <b>No. Missing values</b> | 1034    | 380  | 82     | 474  | 213               |
| <b>≤ 29</b>         | <b>Minimum</b>            | 0       | 0    | 0      | 0    | 0                 |
|                     | <b>First quartile</b>     | 1       | 1    | 0      | 0    | 0                 |
|                     | <b>Median</b>             | 2       | 2    | 0      | 0    | 0                 |
|                     | <b>Third quartile</b>     | 4       | 3    | 0      | 0    | 1                 |
|                     | <b>Maximum</b>            | 42      | 22   | 22     | 25   | 23                |
|                     | <b>No. Missing values</b> | 194     | 12   | 5      | 167  | 25                |

**Table S14.** Contact distribution by threshold in each setting and overall, for the Netherlands (N=3172).

| Threshold               | Statistic                 | Overall | Home | School | Work | General community |
|-------------------------|---------------------------|---------|------|--------|------|-------------------|
| <b>90%<br/>quantile</b> | <b>Minimum</b>            | 0       | 0    | 0      | 0    | 0                 |
|                         | <b>First quartile</b>     | 1       | 1    | 0      | 0    | 0                 |
|                         | <b>Median</b>             | 2       | 1    | 0      | 0    | 0                 |
|                         | <b>Third quartile</b>     | 4       | 2    | 0      | 0    | 2                 |
|                         | <b>Maximum</b>            | 17      | 4    | 0      | 8    | 5                 |
|                         | <b>No. Missing values</b> | 718     | 204  | 43     | 398  | 226               |
| <b>≤ 29</b>             | <b>Minimum</b>            | 0       | 0    | 0      | 0    | 0                 |
|                         | <b>First quartile</b>     | 1       | 1    | 0      | 0    | 0                 |
|                         | <b>Median</b>             | 3       | 1    | 0      | 0    | 0                 |
|                         | <b>Third quartile</b>     | 7       | 3    | 0      | 0    | 2                 |
|                         | <b>Maximum</b>            | 46      | 20   | 18     | 29   | 25                |
|                         | <b>No. Missing values</b> | 135     | 8    | 2      | 106  | 28                |

**Table S15.** Contact distribution by threshold in each setting and overall, for the UK (N=7371).

| Threshold               | Statistic                 | Overall | Home | School | Work | General community |
|-------------------------|---------------------------|---------|------|--------|------|-------------------|
| <b>90%<br/>quantile</b> | <b>Minimum</b>            | 0       | 0    | 0      | 0    | 0                 |
|                         | <b>First quartile</b>     | 1       | 1    | 0      | 0    | 0                 |
|                         | <b>Median</b>             | 2       | 1    | 0      | 0    | 0                 |
|                         | <b>Third quartile</b>     | 3       | 2    | 0      | 0    | 1                 |
|                         | <b>Maximum</b>            | 15      | 4    | 0      | 8    | 5                 |
|                         | <b>No. Missing values</b> | 1633    | 426  | 175    | 773  | 713               |
| <b>≤ 29</b>             | <b>Minimum</b>            | 0       | 0    | 0      | 0    | 0                 |
|                         | <b>First quartile</b>     | 1       | 1    | 0      | 0    | 0                 |
|                         | <b>Median</b>             | 2       | 1    | 0      | 0    | 0                 |
|                         | <b>Third quartile</b>     | 5       | 3    | 0      | 0    | 2                 |
|                         | <b>Maximum</b>            | 79      | 25   | 25     | 29   | 29                |
|                         | <b>No. Missing values</b> | 478     | 16   | 34     | 353  | 170               |

**Table S16.** Contact distribution by threshold in each setting and overall, for the US (N=11,917).

| Threshold       | Statistic          | Overall | Home | School | Work | General community |
|-----------------|--------------------|---------|------|--------|------|-------------------|
| 90%<br>quantile | Minimum            | 0       | 0    | 0      | 0    | 0                 |
|                 | First quartile     | 1       | 1    | 0      | 0    | 0                 |
|                 | Median             | 2       | 1    | 0      | 0    | 0                 |
|                 | Third quartile     | 4       | 2    | 0      | 0    | 1                 |
|                 | Maximum            | 17      | 4    | 0      | 8    | 5                 |
|                 | No. Missing values | 3131    | 1036 | 197    | 1330 | 1340              |
| ≤ 29            | Minimum            | 0       | 0    | 0      | 0    | 0                 |
|                 | First quartile     | 1       | 1    | 0      | 0    | 0                 |
|                 | Median             | 3       | 1    | 0      | 0    | 0                 |
|                 | Third quartile     | 6       | 3    | 0      | 0    | 2                 |
|                 | Maximum            | 60      | 28   | 22     | 29   | 28                |
|                 | No. Missing values | 819     | 27   | 47     | 561  | 306               |

**Table S17.** Model-predicted mean number (with standard error (SE)) of daily contacts per person compared with pre-pandemic model predictions, by country, setting, and week, March-April 2020. The “Overall” category encompasses contacts reported in all four surveyed settings, e.g., home, school, work, and general community. Respondents with contacts above the  $\leq 29$  threshold were removed from the analysis.

| Country        | Setting   | Prior to COVID-19 |      | Week 2020-11 (Mar 9 – 15) |      | Week 2020-12 (Mar 16 – 22) |      | Week 2020-13 (Mar 23 – 29) |      | Week 2020-14 (Mar 30 – Apr 5) |      | Week 2020-15 (Apr 6 – 12) |      |
|----------------|-----------|-------------------|------|---------------------------|------|----------------------------|------|----------------------------|------|-------------------------------|------|---------------------------|------|
|                |           | Mean              | SE   | Mean                      | SE   | Mean                       | SE   | Mean                       | SE   | Mean                          | SE   | Mean                      | SE   |
|                |           | Belgium           | Home | 3.15                      | 0.15 |                            |      |                            |      |                               |      | 1.49                      | 0.05 |
|                | Community | 5.34              | 0.3  |                           |      |                            |      |                            |      | 1.25                          | 0.14 | 1.24                      | 0.06 |
|                | Work      | 3.05              | 0.36 |                           |      |                            |      |                            |      | 1.07                          | 0.19 | 1.36                      | 0.13 |
|                | Total     | 11.78             | 0.48 |                           |      |                            |      |                            |      | 3.77                          | 0.23 | 4.11                      | 0.13 |
| France         | Home      | 2.7               | 0.07 |                           |      |                            |      | 1.49                       | 0.08 | 1.49                          | 0.06 | 1.48                      | 0.08 |
|                | Community | 4.59              | 0.13 |                           |      |                            |      | 1.07                       | 0.1  | 0.97                          | 0.08 | 0.8                       | 0.08 |
|                | Work      | 2.37              | 0.12 |                           |      |                            |      | 0.87                       | 0.15 | 0.82                          | 0.13 | 0.9                       | 0.12 |
|                | Total     | 10.3              | 0.21 |                           |      |                            |      | 3.37                       | 0.19 | 3.08                          | 0.12 | 3.08                      | 0.15 |
| Germany        | Home      | 2.73              | 0.1  |                           |      | 1.93                       | 0.08 | 1.65                       | 0.04 | 1.74                          | 0.04 | 1.83                      | 0.05 |
|                | Community | 2.97              | 0.14 |                           |      | 2.78                       | 0.21 | 1.84                       | 0.1  | 1.68                          | 0.07 | 2.11                      | 0.08 |
|                | Work      | 1.82              | 0.17 |                           |      | 2.54                       | 0.31 | 1.67                       | 0.16 | 1.88                          | 0.14 | 1.71                      | 0.12 |
|                | Total     | 8.03              | 0.27 |                           |      | 6.83                       | 0.32 | 5.16                       | 0.18 | 4.96                          | 0.12 | 5.49                      | 0.14 |
| Italy          | Home      | 3.56              | 0.19 | 1.9                       | 0.05 | 1.84                       | 0.05 | 1.74                       | 0.04 | 1.7                           | 0.04 | 1.82                      | 0.06 |
|                | Community | 7.91              | 0.36 | 1.1                       | 0.08 | 0.77                       | 0.05 | 0.63                       | 0.05 | 0.67                          | 0.05 | 0.89                      | 0.1  |
|                | Work      | 5.28              | 0.53 | 1.29                      | 0.15 | 0.72                       | 0.08 | 0.74                       | 0.16 | 0.48                          | 0.06 | 0.88                      | 0.17 |
|                | Total     | 18.19             | 0.61 | 4.35                      | 0.15 | 3.32                       | 0.11 | 3.08                       | 0.1  | 2.91                          | 0.1  | 3.5                       | 0.19 |
| Netherlands    | Home      | 3                 | 0.23 |                           |      |                            |      |                            |      | 1.92                          | 0.06 | 1.97                      | 0.07 |
|                | Community | 7.13              | 0.76 |                           |      |                            |      |                            |      | 1.43                          | 0.1  | 1.59                      | 0.1  |
|                | Work      | 4.97              | 1.08 |                           |      |                            |      |                            |      | 2.23                          | 0.2  | 2.02                      | 0.17 |
|                | Total     | 15.03             | 1.2  |                           |      |                            |      |                            |      | 5.11                          | 0.18 | 5.5                       | 0.21 |
| Spain          | Home      |                   |      |                           |      |                            |      | 1.8                        | 0.05 | 1.91                          | 0.06 | 1.84                      | 0.05 |
|                | Community |                   |      |                           |      |                            |      | 0.89                       | 0.08 | 0.82                          | 0.07 | 0.99                      | 0.08 |
|                | Work      |                   |      |                           |      |                            |      | 0.68                       | 0.11 | 0.7                           | 0.09 | 0.97                      | 0.14 |
|                | Total     |                   |      |                           |      |                            |      | 3.44                       | 0.15 | 3.45                          | 0.13 | 3.64                      | 0.14 |
| United Kingdom | Home      | 3.54              | 0.14 | 2.25                      | 0.09 | 2.21                       | 0.11 | 1.76                       | 0.04 | 1.72                          | 0.05 | 1.76                      | 0.05 |
|                | Community | 4.07              | 0.21 | 3.73                      | 0.31 | 3.16                       | 0.3  | 1                          | 0.06 | 0.8                           | 0.06 | 0.81                      | 0.09 |
|                | Work      | 2.89              | 0.39 | 3.76                      | 0.9  | 2.47                       | 0.37 | 1.17                       | 0.11 | 0.63                          | 0.1  | 0.71                      | 0.12 |
|                | Total     | 10.58             | 0.35 | 8.77                      | 0.47 | 7.46                       | 0.46 | 3.85                       | 0.13 | 3.07                          | 0.11 | 3.41                      | 0.16 |
| United States  | Home      |                   |      | 2.29                      | 0.08 | 2.17                       | 0.05 | 2.1                        | 0.04 | 1.97                          | 0.03 | 2.1                       | 0.04 |
|                | Community |                   |      | 3.77                      | 0.19 | 2.27                       | 0.12 | 1.42                       | 0.07 | 1.09                          | 0.05 | 1.42                      | 0.08 |
|                | Work      |                   |      | 2.36                      | 0.26 | 2.29                       | 0.27 | 1.39                       | 0.11 | 1.45                          | 0.16 | 1.39                      | 0.15 |
|                | Total     |                   |      | 8.81                      | 0.31 | 6.3                        | 0.2  | 4.81                       | 0.13 | 4.42                          | 0.13 | 4.79                      | 0.14 |

## References

- 1 Perrotta D, Grow A, Rampazzo F, *et al.* Behaviours and attitudes in response to the COVID-19 pandemic: insights from a cross-national Facebook survey. *EPJ Data Sci* 2021;**10**:1–13. doi:10.1140/epjds/s13688-021-00270-1
- 2 Grow A, Perrotta D, Del Fava E, *et al.* Addressing Public Health Emergencies via Facebook Surveys: Advantages, Challenges, and Practical Considerations. *J Med Internet Res* 2020;**22**:e20653. doi:10.2196/20653
- 3 Eurostat. *Eurostat regional yearbook: 2019 edition*. 2019. [http://publications.europa.eu/publication/manifestation\\_identifier/PUB\\_KSHA19001ENN](http://publications.europa.eu/publication/manifestation_identifier/PUB_KSHA19001ENN) (accessed 15 May 2020).
- 4 Ipsos. Public Opinion on the Coronavirus outbreak: a multi-country poll from Ipsos. 2020. <https://www.ipsos.com/en/coronavirus-public-opinion> (accessed 15 May 2020).
- 5 Pötzschke S, Braun M. Migrant Sampling Using Facebook Advertisements: A Case Study of Polish Migrants in Four European Countries. *Soc Sci Comput Rev* 2016;**35**:633–53. doi:10.1177/0894439316666262
- 6 Hoffman Pham K, Rampazzo F, Rosenzweig LR. Online Surveys and Digital Demography in the Developing World: Facebook Users in Kenya. *ArXiv191003448 Cs* Published Online First: 8 October 2019. <http://arxiv.org/abs/1910.03448> (accessed 1 Dec 2019).
- 7 Zhang B, Mildemberger M, Howe PD, *et al.* Quota sampling using Facebook advertisements. *Polit Sci Res Methods* 2018;:1–7. doi:10.1017/psrm.2018.49
- 8 Keiding N, Louis TA. Perils and potentials of self-selected entry to epidemiological studies and surveys. *J R Stat Soc Ser A Stat Soc* 2016;**179**:319–76. doi:10.1111/rssa.12136
- 9 Mercer AW, Kreuter F, Keeter S, *et al.* Theory and Practice in Nonprobability Surveys Parallels between Causal Inference and Survey Inference. *Public Opin Q* 2017;**81**:250–71. doi:10.1093/poq/nfw060
- 10 US Census Bureau. 2018 Population Estimates by Age, Sex, Race and Hispanic Origin. U. S. Census Bur. <https://www.census.gov/newsroom/press-kits/2019/detailed-estimates.html> (accessed 15 May 2020).
- 11 Mossong J, Hens N, Jit M, *et al.* Social Contacts and Mixing Patterns Relevant to the Spread of Infectious Diseases. *PLoS Med* 2008;**5**:e74. doi:10.1371/journal.pmed.0050074
- 12 Béraud G, Kazmierczak S, Beutels P, *et al.* The French Connection: The First Large Population-Based Contact Survey in France Relevant for the Spread of Infectious Diseases. *PLoS ONE* 2015;**10**:e0133203. doi:10.1371/journal.pone.0133203
- 13 Teslya A, Pham TM, Godijk NG, *et al.* Impact of self-imposed prevention measures and short-term government-imposed social distancing on mitigating and delaying a COVID-19 epidemic: A modelling study. *PLoS Med* 2020;**17**:e1003166. doi:10.1371/journal.pmed.1003166

- 1  
2  
3 14 Chu DK, Akl EA, Duda S, *et al*. Physical distancing, face masks, and eye protection to prevent  
4 person-to-person transmission of SARS-CoV-2 and COVID-19: a systematic review and meta-  
5 analysis. *The Lancet* 2020;**395**:1973–87. doi:10.1016/S0140-6736(20)31142-9  
6
- 7 15 Diekmann O, Heesterbeek JAP, Metz JAJ. On the definition and the computation of the basic  
8 reproduction ratio  $R_0$  in models for infectious diseases in heterogeneous populations. *J Math Biol*  
9 1990;**28**:365–82. doi:10.1007/BF00178324  
10
- 11 16 Wallinga J, Teunis P, Kretzschmar M. Using Data on Social Contacts to Estimate Age-specific  
12 Transmission Parameters for Respiratory-spread Infectious Agents. *Am J Epidemiol* 2006;**164**:936–  
13 44. doi:10.1093/aje/kwj317  
14
- 15 17 Coletti P, Wambua J, Gimma A, *et al*. CoMix: comparing mixing patterns in the Belgian population  
16 during and after lockdown. *Sci Rep* 2020;**10**:21885. doi:10.1038/s41598-020-78540-7  
17
- 18 18 Feehan DM, Mahmud AS. Quantifying population contact patterns in the United States during the  
19 COVID-19 pandemic. *Nat Commun* 2021;**12**:893. doi:10.1038/s41467-021-20990-2  
20
- 21 19 Jarvis CI, Van Zandvoort K, Gimma A, *et al*. Quantifying the impact of physical distance measures on  
22 the transmission of COVID-19 in the UK. *BMC Med* 2020;**18**:124. doi:10.1186/s12916-020-01597-8  
23
- 24 20 Arregui S, Aleta A, Sanz J, *et al*. Projecting social contact matrices to different demographic  
25 structures. *PLoS Comput Biol* 2018;**14**:e1006638. doi:10.1371/journal.pcbi.1006638  
26
- 27 21 WHO. Transmission of SARS-CoV-2: implications for infection prevention precautions.  
28 2020.[https://www.who.int/news-room/commentaries/detail/transmission-of-sars-cov-2-implications-](https://www.who.int/news-room/commentaries/detail/transmission-of-sars-cov-2-implications-for-infection-prevention-precautions)  
29 [for-infection-prevention-precautions](https://www.who.int/news-room/commentaries/detail/transmission-of-sars-cov-2-implications-for-infection-prevention-precautions) (accessed 24 Aug 2020).  
30  
31
- 32 22 Quinn K. Social media and social wellbeing in later life. *Ageing Soc* 2019;:1–22.  
33 doi:10.1017/S0144686X19001570  
34  
35  
36  
37  
38  
39  
40  
41  
42  
43  
44  
45  
46  
47  
48  
49  
50  
51  
52  
53  
54  
55  
56  
57  
58  
59  
60



Table 1 STROBE Statement—Checklist of items that should be included in reports of **cross-sectional studies**

|                              | Item No | Recommendation                                                                                                                                                                                    | Page |
|------------------------------|---------|---------------------------------------------------------------------------------------------------------------------------------------------------------------------------------------------------|------|
| <b>Title and abstract</b>    | 1       | (a) Indicate the study's design with a commonly used term in the title or the abstract                                                                                                            | 1    |
|                              |         | (b) Provide in the abstract an informative and balanced summary of what was done and what was found                                                                                               | 2    |
| <b>Introduction</b>          |         |                                                                                                                                                                                                   |      |
| Background/rationale         | 2       | Explain the scientific background and rationale for the investigation being reported                                                                                                              | 4    |
| Objectives                   | 3       | State specific objectives, including any prespecified hypotheses                                                                                                                                  | 4-5  |
| <b>Methods</b>               |         |                                                                                                                                                                                                   |      |
| Study design                 | 4       | Present key elements of study design early in the paper                                                                                                                                           | 5    |
| Setting                      | 5       | Describe the setting, locations, and relevant dates, including periods of recruitment, exposure, follow-up, and data collection                                                                   | 5    |
| Participants                 | 6       | (a) Give the eligibility criteria, and the sources and methods of selection of participants                                                                                                       | 5    |
| Variables                    | 7       | Clearly define all outcomes, exposures, predictors, potential confounders, and effect modifiers. Give diagnostic criteria, if applicable                                                          | 6    |
| Data sources/<br>measurement | 8*      | For each variable of interest, give sources of data and details of methods of assessment (measurement). Describe comparability of assessment methods if there is more than one group              | 6    |
| Bias                         | 9       | Describe any efforts to address potential sources of bias                                                                                                                                         | 5    |
| Study size                   | 10      | Explain how the study size was arrived at                                                                                                                                                         |      |
| Quantitative variables       | 11      | Explain how quantitative variables were handled in the analyses. If applicable, describe which groupings were chosen and why                                                                      | 6-7  |
| Statistical methods          | 12      | (a) Describe all statistical methods, including those used to control for confounding                                                                                                             | 6-8  |
|                              |         | (b) Describe any methods used to examine subgroups and interactions                                                                                                                               | 6    |
|                              |         | (c) Explain how missing data were addressed                                                                                                                                                       | 6    |
|                              |         | (d) If applicable, describe analytical methods taking account of sampling strategy                                                                                                                |      |
|                              |         | (e) Describe any sensitivity analyses                                                                                                                                                             | 6    |
| <b>Results</b>               |         |                                                                                                                                                                                                   |      |
| Participants                 | 13*     | (a) Report numbers of individuals at each stage of study—eg numbers potentially eligible, examined for eligibility, confirmed eligible, included in the study, completing follow-up, and analysed | 8    |
|                              |         | (b) Give reasons for non-participation at each stage                                                                                                                                              | 8    |
|                              |         | (c) Consider use of a flow diagram                                                                                                                                                                | -    |

1  
2  
3  
4  
5  
6  
7  
8  
9  
10  
11  
12  
13  
14  
15  
16  
17  
18  
19  
20  
21  
22  
23  
24  
25  
26  
27  
28  
29  
30  
31  
32  
33  
34  
35  
36  
37  
38  
39  
40  
41  
42  
43  
44  
45  
46  
47  
48  
49  
50  
51  
52  
53  
54  
55  
56  
57  
58  
59  
60

|                          |     |                                                                                                                                                                                                              |                |
|--------------------------|-----|--------------------------------------------------------------------------------------------------------------------------------------------------------------------------------------------------------------|----------------|
| Descriptive data         | 14* | (a) Give characteristics of study participants (eg demographic, clinical, social) and information on exposures and potential confounders                                                                     | 5, Suppl. Mat. |
|                          |     | (b) Indicate number of participants with missing data for each variable of interest                                                                                                                          | 6, Suppl. Mat. |
| Outcome data             | 15* | Report numbers of outcome events or summary measures                                                                                                                                                         | 9-11           |
| Main results             | 16  | (a) Give unadjusted estimates and, if applicable, confounder-adjusted estimates and their precision (eg, 95% confidence interval). Make clear which confounders were adjusted for and why they were included | 12-13          |
|                          |     | (b) Report category boundaries when continuous variables were categorized                                                                                                                                    |                |
|                          |     | (c) If relevant, consider translating estimates of relative risk into absolute risk for a meaningful time period                                                                                             |                |
| Other analyses           | 17  | Report other analyses done—eg analyses of subgroups and interactions, and sensitivity analyses                                                                                                               | 9-11           |
| <b>Discussion</b>        |     |                                                                                                                                                                                                              |                |
| Key results              | 18  | Summarise key results with reference to study objectives                                                                                                                                                     | 14-15          |
| Limitations              | 19  | Discuss limitations of the study, taking into account sources of potential bias or imprecision. Discuss both direction and magnitude of any potential bias                                                   | 15-17          |
| Interpretation           | 20  | Give a cautious overall interpretation of results considering objectives, limitations, multiplicity of analyses, results from similar studies, and other relevant evidence                                   | 15-17          |
| Generalisability         | 21  | Discuss the generalisability (external validity) of the study results                                                                                                                                        | 15-16          |
| <b>Other information</b> |     |                                                                                                                                                                                                              |                |
| Funding                  | 22  | Give the source of funding and the role of the funders for the present study and, if applicable, for the original study on which the present article is based                                                | 20             |

\*Give information separately for exposed and unexposed groups.

**Note:** An Explanation and Elaboration article discusses each checklist item and gives methodological background and published examples of transparent reporting. The STROBE checklist is best used in conjunction with this article (freely available on the Web sites of PLoS Medicine at <http://www.plosmedicine.org/>, Annals of Internal Medicine at <http://www.annals.org/>, and Epidemiology at <http://www.epidem.com/>). Information on the STROBE Initiative is available at [www.strobe-statement.org](http://www.strobe-statement.org).

# BMJ Open

**The differential impact of physical distancing strategies on social contacts relevant for the spread of SARS-CoV-2: Evidence from a cross-national online survey, March – April 2020**

|                                 |                                                                                                                                                                                                                                                                                                                                                                                                                                         |
|---------------------------------|-----------------------------------------------------------------------------------------------------------------------------------------------------------------------------------------------------------------------------------------------------------------------------------------------------------------------------------------------------------------------------------------------------------------------------------------|
| Journal:                        | <i>BMJ Open</i>                                                                                                                                                                                                                                                                                                                                                                                                                         |
| Manuscript ID                   | bmjopen-2021-050651.R2                                                                                                                                                                                                                                                                                                                                                                                                                  |
| Article Type:                   | Original research                                                                                                                                                                                                                                                                                                                                                                                                                       |
| Date Submitted by the Author:   | 23-Sep-2021                                                                                                                                                                                                                                                                                                                                                                                                                             |
| Complete List of Authors:       | Del Fava, Emanuele; Max-Planck-Institute for Demographic Research Cimentada, Jorge; Max-Planck-Institute for Demographic Research Perrotta, Daniela; Max-Planck-Institute for Demographic Research Grow, André; Max-Planck-Institute for Demographic Research Rampazzo, Francesco; University of Oxford Gil-Clavel, Sofia; Max-Planck-Institute for Demographic Research Zagheni, Emilio; Max-Planck-Institute for Demographic Research |
| <b>Primary Subject Heading</b>: | Epidemiology                                                                                                                                                                                                                                                                                                                                                                                                                            |
| Secondary Subject Heading:      | Infectious diseases, Public health, Sociology                                                                                                                                                                                                                                                                                                                                                                                           |
| Keywords:                       | COVID-19, World Wide Web technology < BIOTECHNOLOGY & BIOINFORMATICS, Public health < INFECTIOUS DISEASES, Epidemiology < INFECTIOUS DISEASES                                                                                                                                                                                                                                                                                           |
|                                 |                                                                                                                                                                                                                                                                                                                                                                                                                                         |

SCHOLARONE™  
Manuscripts



I, the Submitting Author has the right to grant and does grant on behalf of all authors of the Work (as defined in the below author licence), an exclusive licence and/or a non-exclusive licence for contributions from authors who are: i) UK Crown employees; ii) where BMJ has agreed a CC-BY licence shall apply, and/or iii) in accordance with the terms applicable for US Federal Government officers or employees acting as part of their official duties; on a worldwide, perpetual, irrevocable, royalty-free basis to BMJ Publishing Group Ltd ("BMJ") its licensees and where the relevant Journal is co-owned by BMJ to the co-owners of the Journal, to publish the Work in this journal and any other BMJ products and to exploit all rights, as set out in our [licence](#).

The Submitting Author accepts and understands that any supply made under these terms is made by BMJ to the Submitting Author unless you are acting as an employee on behalf of your employer or a postgraduate student of an affiliated institution which is paying any applicable article publishing charge ("APC") for Open Access articles. Where the Submitting Author wishes to make the Work available on an Open Access basis (and intends to pay the relevant APC), the terms of reuse of such Open Access shall be governed by a Creative Commons licence – details of these licences and which [Creative Commons](#) licence will apply to this Work are set out in our licence referred to above.

Other than as permitted in any relevant BMJ Author's Self Archiving Policies, I confirm this Work has not been accepted for publication elsewhere, is not being considered for publication elsewhere and does not duplicate material already published. I confirm all authors consent to publication of this Work and authorise the granting of this licence.

1  
2  
3 1 **The differential impact of physical distancing strategies on social contacts relevant for the spread of**  
4  
5 2 **SARS-CoV-2: Evidence from a cross-national online survey, March – April 2020**  
6

7  
8 3  
9 4 Emanuele Del Fava<sup>1</sup>, Jorge Cimentada<sup>1</sup>, Daniela Perrotta<sup>1</sup>, André Grow<sup>1</sup>, Francesco Rampazzo<sup>2</sup>, Sofia  
10 5 Gil-Clavel<sup>1</sup>, Emilio Zagheni<sup>1</sup>  
11  
12 6

13  
14  
15 7 <sup>1</sup> Max Planck Institute for Demographic Research, Rostock, Germany.

16 8 <sup>2</sup> Saïd Business School, Leverhulme Centre for Demographic Science, and Nuffield College, University  
17 9 of Oxford, Oxford, United Kingdom.  
18  
19  
20  
21

22 10  
23  
24 11 **Corresponding author**

25  
26 12 Emanuele Del Fava, Max Planck Institute for Demographic Research, Konrad-Zuse-Str. 6, 18057 Rostock  
27 13 (Germany), email: [delfava@demogr.mpg.de](mailto:delfava@demogr.mpg.de)  
28  
29  
30  
31  
32  
33  
34  
35  
36  
37  
38  
39  
40  
41  
42  
43  
44  
45  
46  
47  
48  
49  
50  
51  
52  
53  
54  
55  
56  
57  
58  
59  
60

1  
2  
3 14 **ABSTRACT**  
4

5 15 **Objectives:** We investigate changes in social contact patterns following the gradual introduction of non-  
6  
7 16 pharmaceutical interventions and their implications for infection transmission in the early phase of the  
8  
9 17 pandemic.  
10

11 18 **Design, setting, and participants:** We conducted an online survey based on targeted Facebook  
12  
13 19 advertising campaigns across eight countries (Belgium, France, Germany, Italy, the Netherlands, Spain,  
14  
15 20 the United Kingdom, and the United States), achieving a sample of 51,233 questionnaires in the period  
16  
17 21 March 13–April 12, 2020. Post-stratification weights based on census information were produced to  
18  
19 22 correct for selection bias.  
20  
21

22 23 **Outcome measures:** Participants provided data on social contact numbers, adoption of protective  
23  
24 24 behaviours, and perceived level of threat. These data were combined to derive a weekly index of infection  
25  
26 25 transmission, the net reproduction number  $R_t$ .  
27

28 26 **Results:** Evidence from the US and UK showed that the number of daily contacts mainly decreased after  
29  
30 27 governments issued the first physical distancing guidelines. In mid-April, daily social contact numbers had  
31  
32 28 decreased between 61% in Germany and 87% in Italy with respect to pre-COVID levels, mostly due to a  
33  
34 29 contraction in contacts outside the home. Such reductions, which were uniform across age groups, were  
35  
36 30 compatible with an  $R_t$  equal or smaller than one in all countries, except Germany. This indicates lower  
37  
38 31 levels of infection transmission, especially in a period of gradual increase in the adoption rate of the face  
39  
40 32 mask outside the home.  
41  
42

43 33 **Conclusions:** We provided a comparable set of statistics on social contact patterns during the COVID-19  
44  
45 34 pandemic for eight high-income countries, disaggregated by week and other demographic factors, which  
46  
47 35 could be leveraged by the scientific community for developing more realistic epidemic models of  
48  
49 36 COVID-19.  
50  
51  
52  
53  
54  
55  
56  
57  
58  
59  
60

### 37 **Strengths and limitations of this study**

- 38 • The use of targeted Facebook advertisements to rapidly recruit survey respondents made it  
39 possible to collect data on health behaviours in a timely manner and at a lower cost than expected  
40 with traditional surveys during public health emergencies.
- 41 • The use of the same survey instrument in a cross-country perspective enabled us to collect daily  
42 data on social contact numbers and adoption of protective behaviours in a consistent manner in  
43 different epidemic contexts.
- 44 • The stratification of the Facebook advertising campaigns by sex, age group and region of  
45 residence, along with the construction of poststratification weights based on the population  
46 census data of the same variables, helped to reduce the non-representativeness bias in participant  
47 recruitment.
- 48 • Despite the use of poststratification weights, we could not entirely adjust for different behaviours  
49 or social inequalities among Facebook users, since only a limited number of demographic  
50 variables could be included in the ads stratification.
- 51 • Although data on the characteristics of social contacts (e.g., their age) were not collected, we  
52 proposed a method to derive age-specific contact matrices using predictions of the number of  
53 social contacts by age group and estimate the net reproduction number  $R_t$ .

## 54 INTRODUCTION

55 The coronavirus disease 2019 (COVID-19) epidemic has shown the importance of implementing non-  
56 pharmaceutical interventions (NPIs), like physical distancing, to contain the spread of infectious diseases  
57 and to avoid over-burdening health care systems. As the strain of the virus that causes the disease (SARS-  
58 CoV-2) spreads from person to person through infected secretions, like saliva or respiratory droplets from  
59 the nose or mouth, disease transmission mainly occurs via close social contacts, generally when  
60 susceptible individuals breathe in droplets from infected ones, although there is increasing evidence for  
61 airborne transmission through aerosols [1].

62 In the early phase of the pandemic, in the absence of a vaccine and effective antiviral treatments,  
63 the public health measures introduced to contain the disease were largely NPIs aimed at reducing the  
64 number of social contacts, e.g., travel restrictions, school closures, the cancellation of large gatherings, the  
65 promotion of physical distancing practices, and, in some countries, nationwide lockdowns. Quantifying  
66 changes in social contact patterns in response to these interventions is key to (i) improve our understanding  
67 of the determinants of disease transmission, (ii) enable researchers to design more realistic epidemic  
68 models, and, ultimately, (iii) assess the effectiveness of public health measures designed to contain the  
69 disease and prevent new waves of infection [2,3].

70 In this study, we leverage new opportunities for data collection, enabled by the digitalization of  
71 our lives, to assess changes in social contact patterns across countries and over time, and to examine their  
72 implications for the spread of SARS-CoV-2. We estimate the net reproduction number,  $R_t$ , an index that  
73 directly depends on social contact patterns. This is based on a cross-national online survey, the COVID-  
74 19 Health Behaviour Survey (CHBS), for which we recruited participants via targeted Facebook  
75 advertisements stratified by sex, age, and region of residence, during the early phase of the pandemic  
76 [4,5]. One goal of the survey was to evaluate the extent to which social contact numbers changed across  
77 countries and over time, especially in comparison with those observed prior to the pandemic, using  
78 comparable metrics [3,6]. Following the literature on the relationship between social contacts and their  
79 impact on the reproduction number for close-contact infectious diseases [2,7,8], and consistently with



1  
2  
3 80 other social contact surveys conducted in Asia [9], Europe [10–14], Africa [15], and North America  
4  
5 81 [16,17] to assess changes in contact patterns and their impact on infection transmission during the early  
6  
7 82 phase of the pandemic, we quantified participants' social contacts, adoption of protective behaviour, and  
8  
9 83 perceived threat, and estimated the relative impact of changes in social contact numbers on the net  
10  
11 84 reproduction rate  $R_t$ , taking also the effect of other behavioural changes into account.  
12  
13

14 85

## 15 86 **METHODS**

### 16 87 **Study design**

17  
18 88 We designed the CHBS as a cross-country, cross-sectional, and voluntary opt-in online survey to collect  
19  
20 89 key information on people's health and behaviour in eight high-income countries – Belgium, France,  
21  
22 90 Germany, Italy, the Netherlands, Spain, the United Kingdom (UK), and the United States (US). The first  
23  
24 91 wave of data collection ran from March 13 to April 12, 2020, a key period during which the global  
25  
26 92 pandemic was well underway, even though at different stages across countries [4]. To quickly reach large  
27  
28 93 numbers of survey participants across several countries, recruitment occurred via targeted advertisements  
29  
30 94 implemented through the Facebook Ads Manager, a tool usually employed by advertisers to create  
31  
32 95 marketing campaigns for their products. The ads were stratified by sex, age group, and region of  
33  
34 96 residence, in order to ensure that a minimum number of respondents could be reached in each stratum  
35  
36 97 [18,19]. Post-stratification weights by sex, age group, and region of residence were used in all analyses.  
37  
38 98 These were obtained by dividing the true population proportion in each stratum (based on nationally  
39  
40 99 representative census data [20,21]) by the sample proportion from the same stratum. The effect of  
41  
42 100 applying these weights to the sample is shown in the Supplementary Tables S1-S8. Ethical approval for  
43  
44 101 the study was obtained from the Ethics Council of the Max Planck Society. Participation was anonymous,  
45  
46 102 voluntary, and open to people aged 18 or older who gave their informed consent. This study was funded  
47  
48 103 with support from the Max Planck Institute for Demographic Research, which is part of the Max Planck  
49  
50 104 Society.  
51  
52  
53  
54  
55  
56  
57  
58  
59  
60

1  
2  
3 105 We asked respondents to report the number of social contacts (defined as any interaction  
4  
5 106 involving either physical contact or a conversation of three or more words in the physical presence of  
6  
7 107 another person) on the day prior to the survey in four different settings, i.e., at home, at school, at work,  
8  
9 108 and in the general community (e.g., during commuting or leisure activities) (Supplementary Fig. S1). We  
10  
11 109 calculated the overall number of daily contacts per person as the sum of contacts in the four settings, after  
12  
13 110 removing participants who reported more contacts than the 90% quantile of the contact distribution for  
14  
15 111 the respective setting. This choice was motivated by the need to remove low-quality responses with  
16  
17 112 implausibly high contact numbers. Our results were robust to the choice of the threshold, as we also  
18  
19 113 considered a fixed cut-off point equal to 29 contacts, which has been used in a seminal social contact  
20  
21 114 study [3] and which resulted in slightly higher average contact numbers (Supplementary Tables S9-S16).  
22  
23 115 We also asked participants to report, among others, their perceived level of threat (Q13: “What level of  
24  
25 116 threat do you think the coronavirus poses to... you personally? ... your family?”) and their adoption of  
26  
27 117 any protective behaviours that might have an impact on disease transmissibility [22] (Q18: “Which of the  
28  
29 118 following actions, if any, have you already taken to protect yourself from the coronavirus?... washed  
30  
31 119 hands more often?... worn a face mask?... avoided social activities (e.g., meeting friends)?”).  
32  
33  
34  
35  
36

### 37 121 **Data analysis**

38  
39 122 We modelled the number of daily contacts reported by participants using negative binomial regression to  
40  
41 123 account for possible over-dispersion in the contact data [23]. The models were fitted independently by  
42  
43 124 country, setting of contact, and contact threshold, and adjusted for both socio-demographic characteristics  
44  
45 125 and behavioural responses of respondents. The first group accounted for sex, age group, region of  
46  
47 126 residence, education level, working status, household (HH) size (continuous and centred around the  
48  
49 127 mean), day type (whether weekday or weekend), and being foreign-born. The second group included a  
50  
51 128 dummy variable for each protective behaviour and a threat perception index, built by averaging the threat  
52  
53 129 to oneself (much higher for older adults than for the 18-24 group [4]) and to the family. For each fitted  
54  
55  
56  
57  
58  
59  
60

1  
2  
3 130 model, we predicted the mean number of contacts, overall and by age group, adjusted at the mean values  
4  
5 131 of the three behavioural variables and the feeling of threat.

6  
7 132 Next, we assessed the implications of the changes in social contact numbers for the net  
8  
9 133 reproduction number ( $R_t$ , i.e., the average number of new infections generated by an infectious person at  
10  
11 134 time  $t$  in a population, either partially or fully susceptible, considering the current interventions and the  
12  
13 135 potential spontaneous behavioural change in response to the risk of infection [24,25]), estimated as the  
14  
15 136 dominant eigenvalue of the next generation matrix  $\mathbf{N}$ , which provides information on the numbers of  
16  
17 137 newly infected individuals by age group at a given time [26]. Under the “social contact hypothesis”  
18  
19 138 [2,27], we have the relationship  $\mathbf{N} = Dq\mathbf{C}$ , where  $\mathbf{C}$  denotes the matrix containing the average number of  
20  
21 139 contacts between age groups,  $q$  is the infection transmissibility, and  $D$  is the length of the infectious  
22  
23 140 period. We used the proportional relationship between  $\mathbf{N}$  and  $\mathbf{C}$ , i.e.,  $\mathbf{N} = \frac{R_t}{\rho(\mathbf{C})}\mathbf{C}$ , where  $\rho(\mathbf{C})$  denotes the  
24  
25 141 dominant eigenvalue of  $\mathbf{C}$ , to assess changes in  $R_t$  due to changes in social contact numbers [11,14,17].  
26  
27 142 We compared our contact data with those collected prior to the epidemic, either from the POLYMOD  
28  
29 143 study (Belgium, Germany, Italy, the Netherlands, and the UK) [3,28], or from the Comes-F study  
30  
31 144 (France) [6,29], and we derived age-specific social contact matrices  $\mathbf{C}$  compatible with the demographic  
32  
33 145 structure of each country at the beginning of 2020 [30].  
34  
35  
36  
37

38 146 We assumed that (i) the basic reproduction number  $R_0$  of the infection was consistent with social  
39  
40 147 mixing as measured prior to COVID-19, under the assumption of absence of immunity in the population  
41  
42 148 and of any behavioural change and interventions; (ii) the parameters  $D$  and  $q$  did not change over time;  
43  
44 149 (iii) the initial contact matrices of Italy and the UK could be a reasonable replacement of contact patterns  
45  
46 150 of Spain and the US, because of cultural similarity, after projecting them on the respective demographic  
47  
48 151 structures.

49  
50 152 We obtained weekly contact matrices  $\mathbf{C}_w^{cov}$  by multiplying the normalised pre-COVID contact  
51  
52 153 matrices  $\mathbf{C}^{pre}$  with the predicted contact numbers by age group and week (see more details on matrix  
53  
54 154 construction in the Supplementary Material). We finally computed the weekly values of  $R_t^w$  as  $R_0 f_R^w$ ,  
55  
56  
57  
58  
59  
60

1  
2  
3 155 where the weekly reduction factor  $f_R^w$  was given by the ratio between the dominant eigenvalue of the  
4  
5 156 weekly contact matrix and that of the pre-COVID matrix, i.e.,  $f_R^w = \rho(\mathbf{C}_w^{cov})/\rho(\mathbf{C}^{pre})$ .

7  
8 157 Our estimates of  $R_t^w$  accounted for three sources of uncertainty, namely, (i) the baseline basic  
9  
10 158 reproduction number  $R_0$ , which, according to a meta-analysis of the literature, was assumed to be  
11  
12 159 normally distributed with mean 2.6 and standard deviation 0.54, resulting in the 95% confidence interval  
13  
14 160 (CI) (1.54, 3.66) [14,17]; (ii) the weekly predictions of the daily overall number of contacts, assumed to  
15  
16 161 be normally distributed with mean and standard deviation coming from our predictions; (iii) the pre-  
17  
18 162 COVID contact matrices, which were derived by applying nonparametric bootstrap to the original data.  
19  
20 163 For each source of uncertainty, 5,000 replicates were taken.

22 164 All data preparation and visualization were performed in R software [31], while the negative  
23  
24 165 binomial regression models were fitted in Stata 16.

## 29 167 **Patient and public involvement**

31 168 Respondents were not involved in the design of the study. However, as the survey was disseminated  
32  
33 169 through Facebook ads, users could comment on the ads, leave posts on the study page, and review the  
34  
35 170 page itself. To maintain trust with both current and prospective participants, we engaged with user  
36  
37 171 comments and provided additional information if requested [5].

## 41 173 **RESULTS**

43 174 From an initial sample of 60,048 respondents, we obtained a final sample of 51,233 individuals who (i)  
44  
45 175 completed the questionnaire between March 13 and April 12, 2020, (ii) provided the information on sex,  
46  
47 176 age group, and region of residence, necessary for the computation of the post-stratification weights, and  
48  
49 177 (iii) reported knowing at least something about the coronavirus outbreak at the time of their participation.

51  
52 178 Individual social contacts decreased during the study period in all surveyed countries, plateauing  
53  
54 179 at the lowest levels between calendar week 2020-13 (March 23 – 29) and calendar week 2020-14 (March

1  
2  
3 180 30 – April 5) under both contact number thresholds (Fig. 1 and Supplementary Fig. S2). The decrease was  
4  
5 181 such that around 30% of participants in each country reported having less than one contact per day during  
6  
7 182 the study period (Supplementary Fig. S3).

9 183 Results for the US and the UK showed that the overall numbers of daily social contacts declined  
10  
11 184 considerably after governments issued physical distancing guidelines, mainly occurring during week  
12  
13 185 2020-11 (March 9 – 15), rather than after more stringent lockdown measures were announced. Comparing  
14  
15 186 trends before and after the announcement of physical distancing measures, both occurring between week  
16  
17 187 2020-11 and week 2020-12 [32,33], we estimated that, under the 90% quantile threshold, the average  
18  
19 188 number of daily contacts decreased from 3.67 (8.81 under the  $\leq 29$  threshold) in week 2020-11 to 2.82  
20  
21 189 (4.81) in week 2020-13 in the US, and from 3.43 (8.77) to 2.40 (3.85) in the UK. Then, in week 2020-14,  
22  
23 190 after the implementation of lockdown measures, contact numbers decreased even further in the UK – to  
24  
25 191 2.17 (3.07) – and to a smaller extent in the US – to 2.67 (4.42) –, where contact numbers had essentially  
26  
27 192 plateaued since the beginning of week 2020-13 (Table 1 and Supplementary Table S17). Also in the other  
28  
29 193 countries, where physical distancing guidelines were introduced before the beginning of our study, we  
30  
31 194 found that the average number of contacts had declined to their lowest levels in week 2020-14, ranging  
32  
33 195 from 2.94 and 2.97 in Germany and the Netherlands, respectively, to 1.93 and 2.17 in France and Italy,  
34  
35 196 respectively (Table 1). These results show how reductions in social contacts differed between those  
36  
37 197 countries that eventually applied a full lockdown (people were required to stay at home and not allowed  
38  
39 198 to go out if not necessary), such as Belgium, France, Italy, Spain, and the UK, and those that opted for a  
40  
41 199 partial lockdown (a stricter version of the physical distancing guidelines was imposed, but people had the  
42  
43 200 freedom to go out), such as Germany and the Netherlands.

44  
45 201 The comparison between the pre-pandemic contact data and those in week 2020-15 showed that  
46  
47 202 the largest reduction occurred in Italy, at 87% under the 90% quantile threshold (81% under the  $\leq 29$   
48  
49 203 threshold), though substantial declines also occurred in the other countries, ranging from 61% (32%) in  
50  
51 204 Germany to between 78% and 82% (63% and 70%) in Belgium, France, the Netherlands, and the UK.  
52  
53 205 This variation was mostly due to a decrease of contact numbers in the general community and, to a lower  
54  
55  
56  
57  
58  
59  
60

1  
2  
3 206 extent, at work. Indeed, while the former setting was the main contributor to the overall number of daily  
4  
5 207 contacts in the pre-COVID-19 period, at the end of the study period (week 2020-15) and under the 90%  
6  
7 208 quantile threshold, home contacts had become the largest component, representing up to 50% (in  
8  
9 209 Germany and the Netherlands) and around 70% (in Italy, Spain, and the UK) of all the contacts  
10  
11 210 (Supplementary Fig. S4); this result was slightly attenuated under the  $\leq 29$  threshold, as in Germany and  
12  
13 211 the Netherlands, both the work and the general community represented more important contributors than  
14  
15 212 the household (Supplementary Fig. S5), likely due to the smaller average household size in these two  
16  
17 213 countries (Supplementary Fig. S6).

18  
19  
20 214 The analysis of the determinants of the contact numbers showed a pattern of cross-country  
21  
22 215 heterogeneity, with a dependence on socio-demographic variables such as the household size and being in  
23  
24 216 paid work – all positively associated – and, to a lower extent, being male, and reporting data during the  
25  
26 217 weekend (Supplementary Figs. S7 and S8). In terms of behavioural factors, at the introduction of the  
27  
28 218 physical distancing guidelines in week 2020-11 followed an increase in the rate of adoption of protective  
29  
30 219 behaviour, especially wearing a face mask and avoiding social activities (Fig. 2). This is particularly  
31  
32 220 evident in the UK, the US, and Germany, where we included participants in a period of increasing  
33  
34 221 restrictions. What strikes the most is the increased use of face coverings in all countries, except for  
35  
36 222 Belgium and the Netherlands (stable at 10%) [4]. The largest increases were reported in Italy (from 40%  
37  
38 223 in week 2020-11 to 80% in week 2020-15) and in the US (from 10% in week 2020-11 to 60% in week  
39  
40 224 2020-15), while in the UK it reached 20% by the same date. Between 80% and 90% of participants in  
41  
42 225 every country avoided social activities, with evidence of a sharp increase over time during between week  
43  
44 226 2020-11 and week 2020-13 in the UK and, to a lesser extent, the US. Little to no variation was instead  
45  
46 227 observed for handwashing and the perceived threat. As concerns the association between these other  
47  
48 228 health behaviours and the contact numbers, both avoiding social activities and the feeling of threat were  
49  
50 229 generally associated with a lower number of contacts, while wearing a face mask was often positively  
51  
52 230 associated (Supplementary Fig. S7). Age-specific contact numbers over time were quite heterogenous  
53  
54 231 across settings. In general, people aged 18-24 reported higher contact numbers at home (representing the  
55  
56  
57  
58  
59  
60

1  
2  
3 232 main source of contacts), while people aged 45-64 and older adults reported higher contacts in the general  
4  
5 233 community (Supplementary Figs. S9-12 for the 90% quantile threshold, and Supplementary Figs. S13-  
6  
7 234 S16 for the  $\leq 29$  threshold).

9 235 Finally, the weekly estimates of the net reproduction number  $R_t^w$  generally decreased from the  
10  
11 236 baseline value of the basic reproduction number  $R_0$  under pre-COVID social mixing, albeit with large  
12  
13 237 heterogeneity among countries (Fig. 3). In Italy, Spain, France, and Belgium, the reduction in contact  
14  
15 238 numbers under the 90% quantile threshold led to decreases between 75% and 90% of the baseline  $R_0$ , and  
16  
17 239 hence to a  $R_t^w$  with 95% CI fully below one, as early as in week 2020-11 in Italy, while in the UK and in  
18  
19 240 the US, such evidence did not appear until week 2020-13. In Germany, the decline in the overall contact  
20  
21 241 numbers led to a rather small decrease in the  $R_t^w$ , which reached its minimum value, 1.06 (0.63–1.51), in  
22  
23 242 week 2020-13. Under the  $\leq 29$  threshold, we found that the higher number of contacts entailed  
24  
25 243 reductions of smaller entity in both social contacts and in the  $R_t^w$ , which was below one for Italy and  
26  
27 244 Spain, and equal to one for Belgium, France, Netherlands, and, from week 13, the UK and the US  
28  
29 245 (Supplementary Fig. S17).  
30  
31  
32  
33  
34  
35  
36  
37  
38  
39  
40  
41  
42  
43  
44  
45  
46  
47  
48  
49  
50  
51  
52  
53  
54  
55  
56  
57  
58  
59  
60

**Table 1** Model-predicted mean number of daily contacts per person (with standard errors (SE)) compared with pre-pandemic model predictions, by country, setting, and week, March-April 2020. The “Overall” category encompasses contacts reported in all four surveyed settings, e.g., home, school, work, and general community.

| Country        | Setting   | Prior to COVID-19 |      | Week 2020-11 (Mar 9 – 15) |      | Week 2020-12 (Mar 16 – 22) |      | Week 2020-13 (Mar 23 – 29) |      | Week 2020-14 (Mar 30 – April 5) |      | Week 2020-15 (Apr 6 – 12) |      |
|----------------|-----------|-------------------|------|---------------------------|------|----------------------------|------|----------------------------|------|---------------------------------|------|---------------------------|------|
|                |           | Mean              | SE   | Mean                      | SE   | Mean                       | SE   | Mean                       | SE   | Mean                            | SE   | Mean                      | SE   |
|                |           | Belgium           | Home | 3.15                      | 0.15 |                            |      |                            |      |                                 |      | 1.33                      | 0.05 |
|                | Community | 5.34              | 0.3  |                           |      |                            |      |                            |      | 0.64                            | 0.06 | 0.74                      | 0.03 |
|                | Work      | 3.05              | 0.36 |                           |      |                            |      |                            |      | 0.35                            | 0.07 | 0.36                      | 0.04 |
|                | Overall   | 11.78             | 0.48 |                           |      |                            |      |                            |      | 2.29                            | 0.11 | 2.38                      | 0.06 |
| France         | Home      | 2.7               | 0.07 |                           |      |                            |      | 1.28                       | 0.03 | 1.31                            | 0.03 | 1.25                      | 0.03 |
|                | Community | 4.59              | 0.13 |                           |      |                            |      | 0.5                        | 0.04 | 0.45                            | 0.03 | 0.41                      | 0.03 |
|                | Work      | 2.37              | 0.12 |                           |      |                            |      | 0.24                       | 0.04 | 0.23                            | 0.03 | 0.26                      | 0.04 |
|                | Overall   | 10.3              | 0.21 |                           |      |                            |      | 1.96                       | 0.07 | 1.93                            | 0.05 | 1.89                      | 0.06 |
| Germany        | Home      | 2.73              | 0.1  |                           |      | 1.52                       | 0.04 | 1.44                       | 0.03 | 1.45                            | 0.02 | 1.46                      | 0.02 |
|                | Community | 2.97              | 0.14 |                           |      | 1.33                       | 0.07 | 1.13                       | 0.05 | 0.93                            | 0.03 | 1.15                      | 0.04 |
|                | Work      | 1.82              | 0.17 |                           |      | 0.76                       | 0.1  | 0.56                       | 0.05 | 0.71                            | 0.05 | 0.68                      | 0.05 |
|                | Overall   | 8.03              | 0.27 |                           |      | 3.29                       | 0.12 | 3.1                        | 0.09 | 2.94                            | 0.06 | 3.15                      | 0.06 |
| Italy          | Home      | 3.56              | 0.19 | 1.67                      | 0.03 | 1.63                       | 0.03 | 1.57                       | 0.03 | 1.5                             | 0.04 | 1.6                       | 0.05 |
|                | Community | 7.91              | 0.36 | 0.71                      | 0.04 | 0.6                        | 0.03 | 0.47                       | 0.03 | 0.48                            | 0.03 | 0.56                      | 0.05 |
|                | Work      | 5.28              | 0.53 | 0.51                      | 0.04 | 0.36                       | 0.04 | 0.25                       | 0.03 | 0.21                            | 0.03 | 0.3                       | 0.06 |
|                | Overall   | 18.19             | 0.61 | 2.9                       | 0.08 | 2.47                       | 0.06 | 2.23                       | 0.06 | 2.17                            | 0.06 | 2.36                      | 0.09 |
| Netherlands    | Home      | 3                 | 0.23 |                           |      |                            |      |                            |      | 1.57                            | 0.04 | 1.56                      | 0.04 |
|                | Community | 7.13              | 0.76 |                           |      |                            |      |                            |      | 0.85                            | 0.04 | 0.91                      | 0.04 |
|                | Work      | 4.97              | 1.08 |                           |      |                            |      |                            |      | 0.67                            | 0.06 | 0.74                      | 0.07 |
|                | Overall   | 15.03             | 1.2  |                           |      |                            |      |                            |      | 2.97                            | 0.09 | 3.11                      | 0.1  |
| Spain          | Home      |                   |      |                           |      |                            |      | 1.63                       | 0.04 | 1.61                            | 0.03 | 1.65                      | 0.03 |
|                | Community |                   |      |                           |      |                            |      | 0.66                       | 0.05 | 0.45                            | 0.03 | 0.49                      | 0.03 |
|                | Work      |                   |      |                           |      |                            |      | 0.25                       | 0.05 | 0.19                            | 0.03 | 0.26                      | 0.03 |
|                | Overall   |                   |      |                           |      |                            |      | 2.47                       | 0.08 | 2.25                            | 0.05 | 2.3                       | 0.06 |
| United Kingdom | Home      | 3.54              | 0.14 | 1.65                      | 0.06 | 1.62                       | 0.05 | 1.51                       | 0.03 | 1.52                            | 0.03 | 1.56                      | 0.04 |
|                | Community | 4.07              | 0.21 | 1.27                      | 0.09 | 1.3                        | 0.1  | 0.62                       | 0.03 | 0.51                            | 0.03 | 0.53                      | 0.04 |
|                | Work      | 2.89              | 0.39 | 0.65                      | 0.12 | 0.51                       | 0.12 | 0.37                       | 0.04 | 0.2                             | 0.04 | 0.2                       | 0.04 |
|                | Overall   | 10.58             | 0.35 | 3.43                      | 0.17 | 3.18                       | 0.15 | 2.4                        | 0.05 | 2.17                            | 0.06 | 2.28                      | 0.07 |
| United States  | Home      |                   |      | 1.66                      | 0.05 | 1.69                       | 0.03 | 1.66                       | 0.02 | 1.56                            | 0.04 | 1.69                      | 0.03 |
|                | Community |                   |      | 1.5                       | 0.07 | 1.07                       | 0.05 | 0.8                        | 0.03 | 0.7                             | 0.03 | 0.72                      | 0.03 |
|                | Work      |                   |      | 0.64                      | 0.08 | 0.55                       | 0.06 | 0.47                       | 0.04 | 0.45                            | 0.05 | 0.41                      | 0.05 |
|                | Overall   |                   |      | 3.67                      | 0.13 | 3.17                       | 0.08 | 2.82                       | 0.06 | 2.67                            | 0.05 | 2.72                      | 0.06 |



## 251 **DISCUSSION**

252 This paper provided comparative estimates of the daily number of social contacts, overall and by setting  
253 of contact, that people had during the early phase of the COVID-19 pandemic, between March 13 (week  
254 2020-11) and April 12 (week 2020-15), in Belgium, France, Germany, Italy, the Netherlands, Spain, the  
255 UK, and the US, disaggregated by week. Compared to the pre-COVID period, overall contact numbers  
256 had substantively decreased, although not uniformly across all countries. Reductions were smaller than  
257 the 86% observed in Wuhan (China) in February 2020 [9], as they ranged from 32% in Germany to 81%  
258 in Italy, under the  $\leq 29$  contacts threshold. Our estimates were consistent with those from other  
259 independent studies conducted at the same time in Europe and the US [10–14,17]. The unique aspect of  
260 our study is that it is the only one to use a consistent approach to collect comparative data across several  
261 countries and on a daily basis over an extended period of time.

262 Three results are especially relevant to characterize the changes in social contact patterns and  
263 their implications for infection transmission. First, our findings suggest that the countries with the highest  
264 numbers of social contacts were those that implemented only partial lockdowns (or stricter versions of the  
265 physical distancing guidelines), whereas those that implemented full lockdowns experienced much lower  
266 contact numbers. In this latter group, compared to the pre-pandemic period, the household replaced the  
267 general community as the main source of social contacts, while in Germany and the Netherlands the  
268 general community and the work remained the settings contributing the most to the overall contact  
269 patterns.

270 Second, results for the UK and the US showed that the numbers of contacts declined sharply after  
271 governments issued physical distancing guidelines, even before the introduction of lockdown measures,  
272 showing how spontaneous individual responses may also have played a role in the rapid adoption of  
273 protective behaviour. This observation is consistent with the strong association between high perception  
274 risk and the wearing of face masks among vulnerable people [34], as well as with mobile phone data  
275 made available by Google, illustrating the change in human mobility compared to January and February  
276 2020 [35,36].

1  
2  
3 277 Third, in almost all countries, we found that the reduction in contact numbers, while keeping  
4  
5 278 fixed other epidemiological factors, resulted in a reduction of the net reproduction number  $R_t$  below one,  
6  
7 279 and was therefore associated with a lower infection transmission, especially in a period in which the  
8  
9 280 adoption rate of the face mask outside the home was still low, albeit gradually increasing. The exception  
10  
11 281 was Germany, where the estimates of  $R_t$  remained consistently above one during the study period.  
12  
13  
14 282 Independent estimates of  $R_t$  at the beginning of April in Germany, i.e., 1.1 with 95% CI 0.9–1.4,  
15  
16 283 calculated by the Robert Koch Institute using incidence data, were consistent with our estimates under the  
17  
18 284 90% quantile threshold [37]. Our results can be explained by the relatively low social contact numbers in  
19  
20 285 Germany during the pre-COVID period (eight contacts per day, on average) and the smaller reductions in  
21  
22 286 social contact numbers during the study period. Nonetheless, our estimates should not be interpreted as  
23  
24 287 evidence that the infection spread was exceptionally high in Germany despite physical distancing  
25  
26 288 interventions. Changes in the  $R_t$  are brought about not only by changes in social contact patterns, but also  
27  
28 289 in infection transmissibility, which might be affected by other health behaviours (e.g., physical distancing  
29  
30 290 in public spaces, increased hand washing or sanitizing, compliance with mask wearing [33,38]) or  
31  
32 291 environmental factors (e.g., surface disinfection and indoor ventilation). Although our sample provided  
33  
34 292 data on some of the behavioural factors (i.e., hand washing, face mask wearing, and avoiding social  
35  
36 293 activities) – which we included in the estimation of the contact numbers – we could not explicitly account  
37  
38 294 for their impact, as well as for the impact of other important factors for which we did not collect data, in  
39  
40 295 the calculation of  $R_t$ , which may be seen as a limitation of this study.

41  
42  
43 296 The study has other limitations that should be considered when interpreting the results. First, we  
44  
45 297 collected data using a sample of Facebook users. Although such nonprobability samples are somewhat  
46  
47 298 less accurate than probability samples in obtaining statistics that are generalisable to the whole  
48  
49 299 population, with the appropriate statistical adjustments, such as those we made, they offer a good  
50  
51 300 approximation to results that could be obtained from probabilistic samples, at least at the country level.  
52  
53  
54 301 Furthermore, samples of Facebook users can be gathered rapidly and therefore offer data that would be  
55  
56  
57  
58  
59  
60

1  
2  
3 302 difficult to collect otherwise during a pandemic. Indeed, to the best of our knowledge, our study is the  
4  
5 303 only cross-country survey on social contacts that exists for the unique period of time considered. Finally,  
6  
7 304 our data cover a large population at minimal costs compared to more traditional surveys [5].  
8

9 305       Second, our approach of recruiting survey respondents through targeted online advertisements  
10  
11 306 may aggravate issues of self-selection bias. Indeed, our participants might differ to some extent from the  
12  
13 307 general population in terms of their sociability patterns (due to their Facebook use) and their concerns  
14  
15 308 about health-related issues (as they opted in to participate in the survey). We tackled this issue by  
16  
17 309 stratifying the campaigns and applying post-stratification weights using factors that are linked to both  
18  
19 310 survey participation and the outcomes of interest [39,40], and ensuring that only respondents who were  
20  
21 311 shown the Facebook ads and clicked on the link could participate in the study (thereby avoiding biases in  
22  
23 312 the sample that we cannot adjust for). However, post-stratification weights cannot correct entirely for  
24  
25 313 different behaviours or social inequalities (e.g., education level, ethnicity, type of profession, or  
26  
27 314 urban/rural residence) among Facebook users, since such variables cannot be included in the ads  
28  
29 315 stratification. Further improvements, which go beyond of the scope of this work, may come from using a  
30  
31 316 multilevel regression and poststratification (MRP) approach, which has shown to work well in practice  
32  
33 317 when making inference from nonprobability samples, especially when having at disposal data from  
34  
35 318 census or a true probability sample on the demographic strata of interest in the population [41].  
36  
37  
38

39 319       Third, several survey participants reported extremely high contact numbers, perhaps because they  
40  
41 320 had little motivation to provide accurate counts. This is a general problem in social contact surveys.  
42  
43 321 Typically, these surveys either include a maximum number of contacts that respondents can report, or  
44  
45 322 researchers assess ex-post the threshold level for the right tail of the contact distribution of contacts. We  
46  
47 323 followed the latter approach and removed respondents reporting implausible values. We found that our  
48  
49 324 results are robust to a choice of cut-off values consistent with those used in standard surveys in the field.  
50  
51 325 Future contact surveys may consider including attention checks items to reduce potential issues with  
52  
53 326 outliers.  
54  
55  
56  
57  
58  
59  
60

1  
2  
3 327 Finally, the calculation of the net reproduction number hinges on two factors characterized by  
4  
5 328 large uncertainty, namely, the initial estimate of the basic reproduction number  $R_0$  and the age-specific  
6  
7 329 social contact matrix. For  $R_0$ , we employed a common value for all parameters coming from a meta-  
8  
9 330 analysis based on data from China, South Korea, and Italy; although this estimate was not specific for  
10  
11 331 each surveyed country, the attached uncertainty made it consistent with estimates used in other studies  
12  
13 332 [11,14,17] and allowed us to disentangle the impact of the reduction in contact numbers from that of other  
14  
15 333 epidemiological factors. For the contact matrices, as we did not collect the age of the individuals  
16  
17 334 contacted by respondents like other single-country studies did [10–12,14,17], we scaled down the pre-  
18  
19 335 pandemic matrices by age-specific factors derived from the data collected in our study. Although our  
20  
21 336 matrices are not based on the observed age mixing patterns during the early phase of the pandemic, we  
22  
23 337 believe that the results on the reduced infection transmission entailed by the reduced contact numbers is  
24  
25 338 still valid and consistent with the results of the other studies.

26  
27  
28 339 In conclusion, we provided an international comparable set of statistics on social contact patterns  
29  
30 340 during the COVID-19 pandemic, disaggregated by country, setting, and week  
31  
32 341 ([https://osf.io/esdmg/?view\\_only=78fb4e2129384f3ba6c63aa67a5b9446](https://osf.io/esdmg/?view_only=78fb4e2129384f3ba6c63aa67a5b9446)). As these estimates offer a more  
33  
34 342 grounded alternative to the theoretical assumptions that have often been used [38,42,43], we believe that  
35  
36 343 the scientific community can draw on this information for developing more realistic epidemic models of  
37  
38 344 COVID-19.

345

## 346 REFERENCES

- 347 1 Greenhalgh T, Jimenez JL, Prather KA, *et al*. Ten scientific reasons in support of airborne  
348 transmission of SARS-CoV-2. *The Lancet* 2021;**397**:1603–5. doi:10.1016/S0140-6736(21)00869-2
- 349 2 Wallinga J, Teunis P, Kretzschmar M. Using Data on Social Contacts to Estimate Age-specific  
350 Transmission Parameters for Respiratory-spread Infectious Agents. *Am J Epidemiol* 2006;**164**:936–  
351 44. doi:10.1093/aje/kwj317
- 352 3 Mossong J, Hens N, Jit M, *et al*. Social Contacts and Mixing Patterns Relevant to the Spread of  
353 Infectious Diseases. *PLoS Med* 2008;**5**:e74. doi:10.1371/journal.pmed.0050074

- 1  
2  
3 354 4 Perrotta D, Grow A, Rampazzo F, *et al.* Behaviours and attitudes in response to the COVID-19  
4 355 pandemic: insights from a cross-national Facebook survey. *EPJ Data Sci* 2021;**10**:1–13.  
5 356 doi:10.1140/epjds/s13688-021-00270-1  
6  
7 357 5 Grow A, Perrotta D, Del Fava E, *et al.* Addressing Public Health Emergencies via Facebook Surveys:  
8 358 Advantages, Challenges, and Practical Considerations. *J Med Internet Res* 2020;**22**:e20653.  
9 359 doi:10.2196/20653  
10  
11 360 6 Béraud G, Kazmierczak S, Beutels P, *et al.* The French Connection: The First Large Population-  
12 361 Based Contact Survey in France Relevant for the Spread of Infectious Diseases. *PLoS ONE*  
13 362 2015;**10**:e0133203. doi:10.1371/journal.pone.0133203  
14  
15 363 7 Melegaro A, Jit M, Gay N, *et al.* What types of contacts are important for the spread of infections?  
16 364 Using contact survey data to explore European mixing patterns. *Epidemics* 2011;**3**:143–51.  
17 365 doi:10.1016/j.epidem.2011.04.001  
18  
19 366 8 Brooks-Pollock E, Read JM, McLean AR, *et al.* Mapping social distancing measures to the  
20 367 reproduction number for COVID-19. *Philos Trans R Soc B Biol Sci* 2021;**376**:20200276.  
21 368 doi:10.1098/rstb.2020.0276  
22  
23 369 9 Zhang J, Litvinova M, Liang Y, *et al.* Changes in contact patterns shape the dynamics of the COVID-  
24 370 19 outbreak in China. *Science* 2020;**368**:1481–6. doi:10.1126/science.abb8001  
25  
26 371 10 Backer JA, Mollema L, Vos ER, *et al.* Impact of physical distancing measures against COVID-19 on  
27 372 contacts and mixing patterns: repeated cross-sectional surveys, the Netherlands, 2016–17, April 2020  
28 373 and June 2020. *Eurosurveillance* 2021;**26**:2000994. doi:10.2807/1560-7917.ES.2021.26.8.2000994  
29  
30 374 11 Coletti P, Wambua J, Gimma A, *et al.* CoMix: comparing mixing patterns in the Belgian population  
31 375 during and after lockdown. *Sci Rep* 2020;**10**:21885. doi:10.1038/s41598-020-78540-7  
32  
33 376 12 Latsuzbaia A, Herold M, Bertemes J-P, *et al.* Evolving social contact patterns during the COVID-19  
34 377 crisis in Luxembourg. *PLoS ONE* 2020;**15**:e0237128. doi:10.1371/journal.pone.0237128  
35  
36 378 13 Sypsa V, Roussos S, Paraskevis D, *et al.* Effects of Social Distancing Measures during the First  
37 379 Epidemic Wave of Severe Acute Respiratory Syndrome Infection, Greece - Volume 27, Number 2—  
38 380 February 2021 - Emerging Infectious Diseases journal - CDC. *Emerg Infect Dis* 2021;**27**:452–62.  
39 381 doi:10.3201/eid2702.203412  
40  
41 382 14 Jarvis CI, Van Zandvoort K, Gimma A, *et al.* Quantifying the impact of physical distance measures  
42 383 on the transmission of COVID-19 in the UK. *BMC Med* 2020;**18**:124. doi:10.1186/s12916-020-  
43 384 01597-8  
44  
45 385 15 Quaife M, van Zandvoort K, Gimma A, *et al.* The impact of COVID-19 control measures on social  
46 386 contacts and transmission in Kenyan informal settlements. *BMC Med* 2020;**18**:316.  
47 387 doi:10.1186/s12916-020-01779-4  
48  
49 388 16 Dorélien AM, Simon A, Hagge S, *et al.* Minnesota Social Contacts and Mixing Patterns Survey with  
50 389 Implications for Modelling of Infectious Disease Transmission and Control. *Surv Pract*  
51 390 2020;**13**:13669. doi:10.29115/SP-2020-0007  
52  
53  
54  
55  
56  
57  
58  
59  
60

- 1  
2  
3 391 17 Feehan DM, Mahmud AS. Quantifying population contact patterns in the United States during the  
4 392 COVID-19 pandemic. *Nat Commun* 2021;**12**:893. doi:10.1038/s41467-021-20990-2
- 6 393 18 Pötzschke S, Braun M. Migrant Sampling Using Facebook Advertisements: A Case Study of Polish  
7 394 Migrants in Four European Countries. *Soc Sci Comput Rev* 2016;**35**:633–53.  
8 395 doi:10.1177/0894439316666262
- 10 396 19 Zhang B, Mildener M, Howe PD, *et al.* Quota sampling using Facebook advertisements. *Polit Sci*  
11 397 *Res Methods* 2018;:1–7. doi:10.1017/psrm.2018.49
- 13 398 20 Eurostat. *Eurostat regional yearbook: 2019 edition*. 2019.  
14 399 [http://publications.europa.eu/publication/manifestation\\_identifier/PUB\\_KSHA19001ENN](http://publications.europa.eu/publication/manifestation_identifier/PUB_KSHA19001ENN) (accessed  
15 400 15 May 2020).
- 17 401 21 US Census Bureau. 2018 Population Estimates by Age, Sex, Race and Hispanic Origin. U. S. Census  
18 402 Bur. 2019. <https://www.census.gov/newsroom/press-kits/2019/detailed-estimates.html> (accessed 15  
19 403 May 2020).
- 21 404 22 Teslya A, Pham TM, Godijk NG, *et al.* Impact of self-imposed prevention measures and short-term  
23 405 government-imposed social distancing on mitigating and delaying a COVID-19 epidemic: A  
24 406 modelling study. *PLoS Med* 2020;**17**:e1003166. doi:10.1371/journal.pmed.1003166
- 26 407 23 Hens N, Goeyvaerts N, Aerts M, *et al.* Mining social mixing patterns for infectious disease models  
27 408 based on a two-day population survey in Belgium. *BMC Infect Dis* 2009;**9**. doi:10.1186/1471-2334-9-  
28 409 5
- 30 410 24 Liu Q-H, Ajelli M, Aleta A, *et al.* Measurability of the epidemic reproduction number in data-driven  
31 411 contact networks. *Proc Natl Acad Sci* 2018;**115**:12680–5. doi:10.1073/pnas.1811115115
- 33 412 25 The Royal Society. Reproduction number (R) and growth rate (r) of the COVID-19 epidemic in the  
34 413 UK. 2020. <https://royalsociety.org/news/2020/09/set-c-covid-r-rate/>
- 36 414 26 Diekmann O, Heesterbeek JAP, Metz JAJ. On the definition and the computation of the basic  
37 415 reproduction ratio  $R_0$  in models for infectious diseases in heterogeneous populations. *J Math Biol*  
38 416 1990;**28**:365–82. doi:10.1007/BF00178324
- 40 417 27 Goeyvaerts N, Hens N, Ogunjimi B, *et al.* Estimating infectious disease parameters from data on  
41 418 social contacts and serological status. *J R Stat Soc Ser C Appl Stat* 2010;**59**:255–77.  
42 419 doi:10.1111/j.1467-9876.2009.00693.x
- 44 [dataset] 28 Mossong J, Hens N, Jit M, *et al.* Data from: POLYMOD social contact data. Zenodo, June 3,  
45 420 2020. doi:10.5281/zenodo.3874557
- 47 [dataset] 29 Béraud G, Kazmerczak S, Beutels P, *et al.* Data from: Social contact data for France.  
48 422 Zenodo, June 9, 2020. doi:10.5281/zenodo.3886590
- 50 424 30 Arregui S, Aleta A, Sanz J, *et al.* Projecting social contact matrices to different demographic  
51 425 structures. *PLoS Comput Biol* 2018;**14**:e1006638. doi:10.1371/journal.pcbi.1006638
- 53 426 31 R Core Team. *R: A Language and Environment for Statistical Computing*. Vienna, Austria: : R  
54 427 Foundation for Statistical Computing 2021. <https://www.R-project.org/>

- 1  
2  
3 428 32 Mervosh S, Lu D, Swales V. See Which States and Cities Have Told Residents to Stay at Home. N.  
4 429 Y. Times. 2020.<https://www.nytimes.com/interactive/2020/us/coronavirus-stay-at-home-order.html>  
5 430 (accessed 25 Sep 2020).  
6  
7 431 33 Flaxman S, Mishra S, Gandy A, *et al*. Estimating the effects of non-pharmaceutical interventions on  
8 432 COVID-19 in Europe. *Nature* 2020;**584**:257–61. doi:10.1038/s41586-020-2405-7  
9  
10 433 34 Perrotta D, Del Fava E, Zagheni E. The Role of Vulnerability in Mediating the Relationship between  
11 434 Threat Perception and the Use of Face Masks in the Context of COVID-19. In: *Workshop*  
12 435 *Proceedings of the 15th International AAAI Conference on Web and Social Media*. 2021.  
13 436 <https://doi.org/10.36190/2021.43> (accessed 24 Jun 2021).  
14  
15 437 35 Google LLC. Google COVID-19 Community Mobility Reports.  
16 438 <https://www.google.com/covid19/mobility/> (accessed 22 Jun 2020).  
17  
18 439 36 Basellini U, Alburez-Gutierrez D, Del Fava E, *et al*. Linking excess mortality to mobility data during  
19 440 the first wave of COVID-19 in England and Wales. *SSM - Popul Health* 2021;**14**:100799.  
20 441 doi:10.1016/j.ssmph.2021.100799  
21  
22 442 37 RKI. RKI - Coronavirus SARS-CoV-2 - Situation report - 9 Apr 2020. Robert Koch Institute 2020.  
23 443 [https://www.rki.de/DE/Content/InfAZ/N/Neuartiges\\_Coronavirus/Situationsberichte/2020-04-09-](https://www.rki.de/DE/Content/InfAZ/N/Neuartiges_Coronavirus/Situationsberichte/2020-04-09-en.pdf?__blob=publicationFile)  
24 444 [en.pdf?\\_\\_blob=publicationFile](https://www.rki.de/DE/Content/InfAZ/N/Neuartiges_Coronavirus/Situationsberichte/2020-04-09-en.pdf?__blob=publicationFile), (accessed 15 May 2020).  
25  
26 445 38 Dehning J, Zierenberg J, Spitzner FP, *et al*. Inferring change points in the spread of COVID-19  
27 446 reveals the effectiveness of interventions. *Science* 2020;**369**. doi:10.1126/science.abb9789  
28  
29 447 39 Keiding N, Louis TA. Perils and potentials of self-selected entry to epidemiological studies and  
30 448 surveys. *J R Stat Soc Ser A Stat Soc* 2016;**179**:319–76. doi:10.1111/rssa.12136  
31  
32 449 40 Mercer AW, Kreuter F, Keeter S, *et al*. Theory and Practice in Nonprobability Surveys Parallels  
33 450 between Causal Inference and Survey Inference. *Public Opin Q* 2017;**81**:250–71.  
34 451 doi:10.1093/poq/nfw060  
35  
36 452 41 Wang W, Rothschild D, Goel S, *et al*. Forecasting elections with non-representative polls. *Int J*  
37 453 *Forecast* 2015;**31**:980–91. doi:10.1016/j.ijforecast.2014.06.001  
38  
39 454 42 Gatto M, Bertuzzo E, Mari L, *et al*. Spread and dynamics of the COVID-19 epidemic in Italy: Effects  
40 455 of emergency containment measures. *Proc Natl Acad Sci* 2020;**117**:10484–91.  
41 456 doi:10.1073/pnas.2004978117  
42  
43 457 43 Salje H, Kiem CT, Lefrancq N, *et al*. Estimating the burden of SARS-CoV-2 in France. *Science*  
44 458 2020;**369**:208–11. doi:10.1126/science.abc3517  
45  
46  
47  
48  
49

## 50 460 STATEMENTS

## 51 461 Author Contributions

1  
2  
3 462 Conceptualization: EDF, EZ; Data Curation: AG, JC; Formal analysis and investigation: EDF, JC; Project  
4  
5 463 Administration: DP, AG; Writing - original draft preparation: EDF, JC, EZ; Writing - review and editing:  
6  
7 464 EDF, JC, DP, AG, FR, SGC, EZ; Funding acquisition: EZ; Resources: DP, AG, FR, SGC; Supervision:  
8  
9 465 EZ.

#### 11 466 **Competing interests**

13 467 None declared.

#### 16 468 **Funding**

18 469 This study was funded with support from the Max Planck Institute for Demographic Research (no  
19  
20 470 award/grant number received), which is part of the Max Planck Society.

#### 22 471 **Data sharing**

24 472 The aggregated contact data that underlie the analyses reported here are provided as weighted averages of  
25  
26 473 daily contact numbers by threshold, country, calendar week, and setting, both overall and stratified by  
27  
28 474 region of residence, age group and sex, at the following link:

30 475 [https://osf.io/esdmg/?view\\_only=78fb4e2129384f3ba6c63aa67a5b9446](https://osf.io/esdmg/?view_only=78fb4e2129384f3ba6c63aa67a5b9446).

#### 32 476 **Ethics approval and consent to participate**

34 477 Ethical approval for the study was obtained from the Ethics Council of the Max Planck Society  
35  
36 478 (Application No: 2020\_07). Participation in this study was voluntary, anonymous, and open to people  
37  
38 479 who were at least 18 years old. Electronic informed consent was obtained from all participants who  
39  
40 480 actively opted in to participate in the online survey, enabling the collection, storage, and processing of  
41  
42 481 their answers.

#### 45 482 **Acknowledgements**

47 483 We thank all participants who took the time to voluntarily complete our survey; the staff at the Max  
48  
49 484 Planck Institute for Demographic Research who contributed to the realization of this project, including  
50  
51 485 the administrative department, the IT department, and the press department; and all our colleagues who  
52  
53 486 took the time to review the translation and the implementation of the survey (Maarten J. Bijlsma, Mathias  
54  
55 487 Lerch, Marília R. Nepomuceno, Tom Theile, Nicolas Todd, Joshua Wilde). We also thank two



1  
2  
3 488 anonymous referees and the Editor of the Journal, whose valuable comments allowed us to greatly  
4  
5 489 improve the quality of the manuscript.  
6

### 7 490 **Figure legends**

9 491 **Fig. 1** Mean overall number of daily social contacts (with 95% CI) smoothed by a simple two-day  
10  
11 492 moving average, by country and study day, March-April 2020. The dotted line corresponds to the date in  
12  
13 493 which the physical distancing guidelines were introduced at the national level; the dashed line  
14  
15 494 corresponds to the date in which the lockdown, regardless of being full or partial, was ordered.

17 495 **Fig. 2** Prevalence of participants' uptake of different behavioural measures to protect themselves from the  
18  
19 496 coronavirus and feeling of threat (averaging the feeling of threat to oneself with that to the family, after  
20  
21 497 rescaling to a 0-100 scale), by country and week.

22  
23 498 **Fig. 3** Absolute change in the weekly net reproduction number  $R_t^w$  with respect to the basic reproduction  
24  
25 499 number  $R_0$  at baseline (A) and percent reduction with respect to  $R_0$  (B), by country and week. The 95%  
26  
27 500 CIs are based on 5,000 replicates.  
28  
29  
30  
31  
32  
33  
34  
35  
36  
37  
38  
39  
40  
41  
42  
43  
44  
45  
46  
47  
48  
49  
50  
51  
52  
53  
54  
55  
56  
57

Type Overall Home Work General community

1  
2  
3  
4  
5  
6  
7  
8  
9  
10  
11  
12  
13  
14  
15  
16  
17  
18  
19  
20  
21  
22  
23  
24  
25  
26  
27  
28  
29  
30  
31  
32  
33  
34  
35  
36  
37  
38



Date of contacts

Date of contacts





## Supplementary Material

### The differential impact of physical distancing strategies on social contacts relevant for the spread of SARS-CoV-2: Evidence from a cross-national online survey, March – April 2020

#### Contents

|                                                           |    |
|-----------------------------------------------------------|----|
| <b>Additional methods</b> .....                           | 2  |
| Survey design .....                                       | 2  |
| Recruitment Strategy .....                                | 2  |
| Poststratification .....                                  | 3  |
| Social contact data .....                                 | 3  |
| Health behaviours and perceived risk .....                | 4  |
| Epidemiological analysis .....                            | 4  |
| <b>Additional figures</b> .....                           | 7  |
| <b>Additional tables</b> .....                            | 23 |
| Comparison between the raw and the weighted samples ..... | 23 |
| Effect for the contact threshold values .....             | 31 |
| <b>References</b> .....                                   | 37 |

## Additional methods

### Survey design

The data used in the analysis came from the Covid-19 Health Behaviour Survey (CHBS), an online survey carried out in multiple countries (and multiple languages) to collect key information about people's health and behaviour during the early phase of the pandemic (March – April 2020) [1]. Participation was voluntary and open to people who were at least 18 years old. Recruitment occurred through targeted advertisements implemented through the Facebook Ads Manager (FAM), which is a tool that can be used to quickly reach large numbers of survey participants across several countries [2]. The ads were stratified by age group, sex, and region of residence (largely following the NUTS-1 classification in Europe and the census regions in the United States, both aggregated into larger macro-regions) to ensure that a minimum number of respondents was reached in all demographic strata.

The questionnaire was divided into multiple sections covering different areas of interest: socio-demographic indicators (age, gender, country of birth, region of residence, level of education, and household size); health indicators (symptoms experienced in the previous seven days, among others); opinions and behaviours' (adoption of protective behaviours and disruption to daily routines, among others); and social contact data. For the purposes of validation and comparability, the questionnaire included standard questions taken from relevant sources, such as the European Social Survey for socio-demographic questions [3], and an Ipsos poll for questions related to public opinion on the COVID-19 outbreak [4].

Informed consent was obtained from all participants, enabling the collection, storage, and processing of their answers. Participants' data was treated anonymously. Ethical approval for the study was obtained from the Ethics Council of the Max Planck Society.

### Recruitment Strategy

Marketers use the FAM to advertise their products or businesses. The FAM enables advertisers to create advertising campaigns that can have various goals, such as creating salience for a given service or product among Facebook users or generating traffic to an external website. Following previous examples of Facebook surveys [5–7], we used the FAM to run campaigns to recruit respondents for our study. The countries included in the study, selected because of the number of COVID-19 cases they were experiencing, were Germany, Italy, Spain, the UK, the US, France, Belgium, and the Netherlands. The FAM allowed us to perform non-probabilistic quota sampling by targeting user groups based on demographic characteristics such as sex, age, and region of residence. In this way, we could not only ensure a minimum number of participants in each combination of strata, but we were also able to control for variables possibly associated the survey outcomes and the propensity to take the survey [8,9].

1  
2  
3 At the beginning of March 2020, prior to the start of the actual survey, we carried out separate  
4 pilots in Italy, the UK, and the US to test the FAM and the performance of our ads, allowing the study to  
5 officially begin on March 13. Fig. S1 shows the question that prompted survey participants to report the  
6 information on their social contacts in the English-language version of the questionnaire.  
7  
8

9 Due to technical problems on the Facebook platform for some countries, very few respondents  
10 accessed the survey on certain days between March 20 and March 25. We thus excluded from the analysis  
11 those days with less than ten respondents. Although this issue might have increased the uncertainty in the  
12 model predictions (especially the daily ones), we believe that the analysis by week is robust and less  
13 affected by this issue.  
14  
15  
16  
17  
18

## 19 Poststratification

20 Since online surveys are not random samples of the population, we adjusted our survey data using a  
21 poststratification weighting approach. In particular, given that our aim was to achieve a nationally  
22 representative sample, we stratified the survey by sex, age group, and region of residence, which are all  
23 important variables that are related to differences in people's responses to the pandemic, as well as to  
24 survey participation. In order to create poststratification weights, we divided the true population  
25 proportion in each stratum, obtained from nationally representative data available through Eurostat (2019)  
26 [3] and the US census (2018) [10], by the sample proportion from the same stratum in our survey. These  
27 poststratification weights were used in all the statistical analyses presented in this paper.  
28  
29  
30  
31  
32  
33  
34

## 35 Social contact data

36 We defined social contacts, which are the focus of this paper, as any interaction involving either physical  
37 contact (such as a handshake or a hug) or a conversation of three or more words in the physical presence  
38 of another person. This definition is consistent with the definition employed in past social contact surveys,  
39 which we used as the baseline for comparison in this work [11,12]. In more detail, we asked respondents  
40 to report the number of individuals with whom they interacted on the day before the survey in different  
41 settings: i.e., at home, at school or college, at work, and in the general community (such as during  
42 commuting or leisure activities); while making it clear that the respondent should not report multiple  
43 interactions with the same person in different settings. However, unlike previous contact surveys, we did  
44 not ask about the characteristics of the contacted individuals (e.g., age and sex) to avoid overburdening  
45 respondents, given the nature of the online survey. The text describing the social contact question is shown  
46 in Fig. S1.  
47  
48  
49  
50  
51  
52  
53  
54  
55  
56  
57  
58  
59  
60

## Health behaviours and perceived risk

We asked respondents to rate the level of perceived threat they thought the COVID-19 posed to different levels of society (Q13), namely, (i) to themselves, (ii) to their family, (iii) to their local community, (iv) to their country, and (v) to the world, using a 5-point Likert scale. For the sake of our analysis, we rescaled participants' responses to the range 0 – 1, where zero indicated “very low threat” and one “very high threat”. To account for a feeling of threat that might have affected social contact patterns of respondents, we combined in one variable the perceived level of threat to themselves and to their families, taking their simple mean. These two indicators were found to have a good internal consistency, having a Cronbach's alpha of 0.84.

Moreover, we asked respondents which health behaviours, in the form of specific actions, they took up to protect themselves from the virus (Question (Q18): “Which of the following actions, if any, have you already taken to protect yourself from the coronavirus?”). Among the listed actions, coded as dummy variables, we asked whether respondents avoided shaking hands, social activities (e.g., meeting friends), crowded places (e.g., restaurants, cinemas, gym, or playground), travelling by public transportation (e.g., by bus, tram, subway, or train) or by taxi, whether they stockpiled medicines or food, whether they used a face mask, and whether they washed their hands or used a sanitizing hand gel more often. For our analysis, we picked three of these actions, which might have an impact on the transmissibility of the virus, namely, avoiding social activities (“Avoided social activities (e.g. meeting friends)”), wearing a face mask (“Worn a face mask”), and washing the hands more often (“Washed hands more often”) [13,14].

## Epidemiological analysis

The net reproduction number  $R_t$  can be estimated as the dominant eigenvalue, denoted as  $\rho$ , of the next generation matrix  $\mathbf{N}$ , i.e.,  $R_t = \rho(\mathbf{N})$ , where  $\mathbf{N}$  provides information on the numbers of newly infected individuals by age group at a given time [15]. Under the “social contact hypothesis”,  $\mathbf{N} = Dq\mathbf{C}$ , where  $\mathbf{C}$  is the matrix containing the average number of contacts between age groups,  $q$  is the disease transmissibility parameter, and  $D$  is the length of the infectiousness period [16]. We use the proportional relationship between  $\mathbf{N}$  and  $\mathbf{C}$ , i.e.,  $\mathbf{N} = \frac{R_t}{\rho(\mathbf{C})}\mathbf{C}$ , to assess changes in  $R_t$  due to changes in social contact numbers [17–19].

As we did not collect information on the age of the individuals encountered by the study participants, we derived the contact matrices  $\mathbf{C}$  for each study week using the following procedure. First, for each country, based on the data collected in the POLYMOD study between 2005 and 2006 [11], and in the Comes-F studies in 2012 [12], we constructed pre-COVID age-specific social contact matrices  $\mathbf{C}^{pre}$ ,



using the same age groups of the survey (18 – 24 years, 25 – 44 years, 45 – 64 years, and 65 years or more), which contained the average number of contacts between participants in the  $i$ th age group and their contactees in the  $j$ th age group, using a constraint for the reciprocity of contact when considering the total number of contacts at the population level. This constraint implies that, in a closed population, the total number of contacts from age class  $i$  to age class  $j$  must be equal to the total number of contacts from age class  $j$  to age class  $i$ . Hence, if we had  $N_i$  individuals in age class  $i$  and  $N_j$  individuals in age class  $j$ , reciprocity would entail that  $C_{ij}N_j = C_{ji}N_i$ . For this purpose, we started by dividing the total number of contacts,  $M_{ij}$ , for the number of participants in each age group,  $n_i$ , i.e.,  $m_{ij} = M_{ij}/n_i$ . We then constructed the matrix with the total number of contacts between age classes at the population level, by multiplying the expected mean number of contacts reported by participants in the age group  $i$  with contactees in the age group  $j$ ,  $m_{ij}$ , for the total number of individuals in the age group  $i$  in the population, i.e.,  $Z_{ij} = m_{ij}N_i$ . At this point, we adjusted  $Z_{ij}$  for reciprocity by averaging the total number of contacts in one direction,  $Z_{ij}$ , with those in the other direction,  $Z_{ji}$ , weighting for the sample size by age group, namely,  $Z_{ij}^{(rec.)} = (Z_{ij}n_i + Z_{ji}n_j)/(n_i + n_j)$  [20]. We finally obtained the expected average number of contacts under reciprocity at the population level dividing again by the population  $N_i$ , i.e.,  $C_{ij}^{pre} = Z_{ij}^{(rec.)}N_i$ .

Second, we projected the matrices  $C^{pre}$  to the population structure of each country in 2020 [20] and, to remove differences in the contact levels between countries, we normalized each matrix  $C^{pre}$  to the average number of contacts at the population level, so that the mean number of contacts of the matrix  $C^{pre+norm}$  was equal to one.

Finally, we multiplied the normalized matrix  $C^{pre+norm}$  by the average number of daily contacts that we predicted for each group and study week, thus obtaining the weekly COVID matrices  $C_w^{cov}$ .

As we did not collect data for people younger than 18 years old, we computed their average number of daily contacts per week in the following way. To reflect school closure during the survey period, we excluded school contacts from the contact data prior to COVID-19, considering only the overlapping age groups between the two types of matrices. Then, for each country, we computed a weekly overall scaling factor, and we obtained the average number of contacts for individuals aged less than 18 by multiplying their average number of pre-COVID-19 contacts in the population for such factor.

To account for the uncertainty in the pre-COVID contact data, we applied a non-parametric bootstrap procedure to the original data, resampling with replacement the participants, proportionally to the population age distribution, and assigning them to their original contact data.

As a last request, we would like you to record the number of persons you had **contact with yesterday** in different locations (at home, at school/college, at work, other locations), from when you woke up to when you went to sleep.

- A contact is defined as:
  - EITHER a **two-way conversation** with three or more words in the physical presence of another person,
  - OR physical **skin-to-skin contact** (for example a handshake, hug, kiss or contact sports).
- Think about every person that you contacted during the day, regardless of whether the contact was long or short, and whether you knew the person or not.
- Contacts made exclusively by telephone or mobile phone should NOT be recorded.
- If you contacted the same person in different locations in the course of the day, only count him/her once, and assign him/her to the location where you two had the contact of longer duration.
  - **Example:** Anne runs a family business together with her husband Tom. Anne and Tom saw each other yesterday both at home and at work. Since they spent more time together at home than at work, Anne will count the contact with Tom as a home contact, and not a work contact.
- If you had no contacts in a given location, please enter 0.

How many persons did you have contacts with yesterday ...

\*... at home?

- Number of people:
- Prefer not to answer

\*... at school/college?

- Number of people:
- Not applicable (e.g. you do not attend any school)
- Prefer not to answer

\*... at work?

(at your workplace or throughout the course of your daily job activity, such as meeting customers or clients)

- Number of people:
- Not applicable (e.g. you do not work)
- Prefer not to answer

\*... in other settings?

(e.g. during transportation and commuting, social and leisure activities, religious services, shopping, or other activities)

- Number of people:
- Prefer not to answer

**Fig. S1.** CHBS questions on daily social contacts.

## Additional figures



**Fig. S2.** Mean overall number of daily social contacts (with 95% CI), smoothed by a simple two-day moving average, by country and study day. The dotted line corresponds to the date in which the physical distancing guidelines were introduced at the national level; the dashed line corresponds to the date in which the lockdown, regardless of being full or partial, was ordered. Respondents with contacts above the  $\leq 29$  threshold were removed from the analysis.

We performed a sensitivity analysis of the threshold chosen to curtail the right tail of the distribution of social contacts, in response to the extremely high values reported by some of the participants. In the following figures and tables, we present the results of the analysis using a fixed cut-off point at 29 contacts per day, removing respondents reporting 30 contacts per day or more in each of the settings.

Two features of the highly skewed distribution of the overall social contacts (Fig. S2) are worth noting. First, we found that the percentages of participants who reported having fewer than one contact per day were relatively high, at more than 35% in all countries except for Germany, the Netherlands, and the US. Second, the distribution was characterized by a long right tail, the length of which depended on the threshold used to remove the outliers at the top of the distribution (Tables S9-S16).

A

Excluding daily contact numbers above the 90% quantile



B

Excluding daily contact numbers above 29



**Fig. S3.** Histogram with the weighted distribution of the overall number of contacts by country. All contacts exclude the top 10% (A) and those equal to 30 or more (B).

In Figures S4-S5, we showed the evolution of the weekly average number of contacts, overall and by setting, after applying the post-stratification weights, under the two threshold scenarios.

Home contacts (which show little variability over the weeks) are the main component of the overall number of contacts, followed by contacts in the general community and at work. Eventually, the contacts at school, which are reduced to zero due to the closure of secondary schools and university/colleges in every surveyed country.



**Fig. S4.** Average number of daily social contacts, overall and by setting, per week and country. Respondents with contacts above the 90% quantile threshold were removed from the analysis.



**Fig. S5.** Average number of daily social contacts, overall and by setting, per week and country. Respondents with contacts above the  $\leq 29$  threshold were removed from the analysis.

Fig. S6 shows the consistency of the household size and the number of home contacts under the two thresholds. More than half of respondents lived either alone or with another person. Respondents living in large households, with five members or more, were more frequent in the US (above 10%). Home contacts ranged between around half a contact per day, reported by people living alone, to three contacts per day or more, reported by people living in households of four or more components, regardless of the threshold.

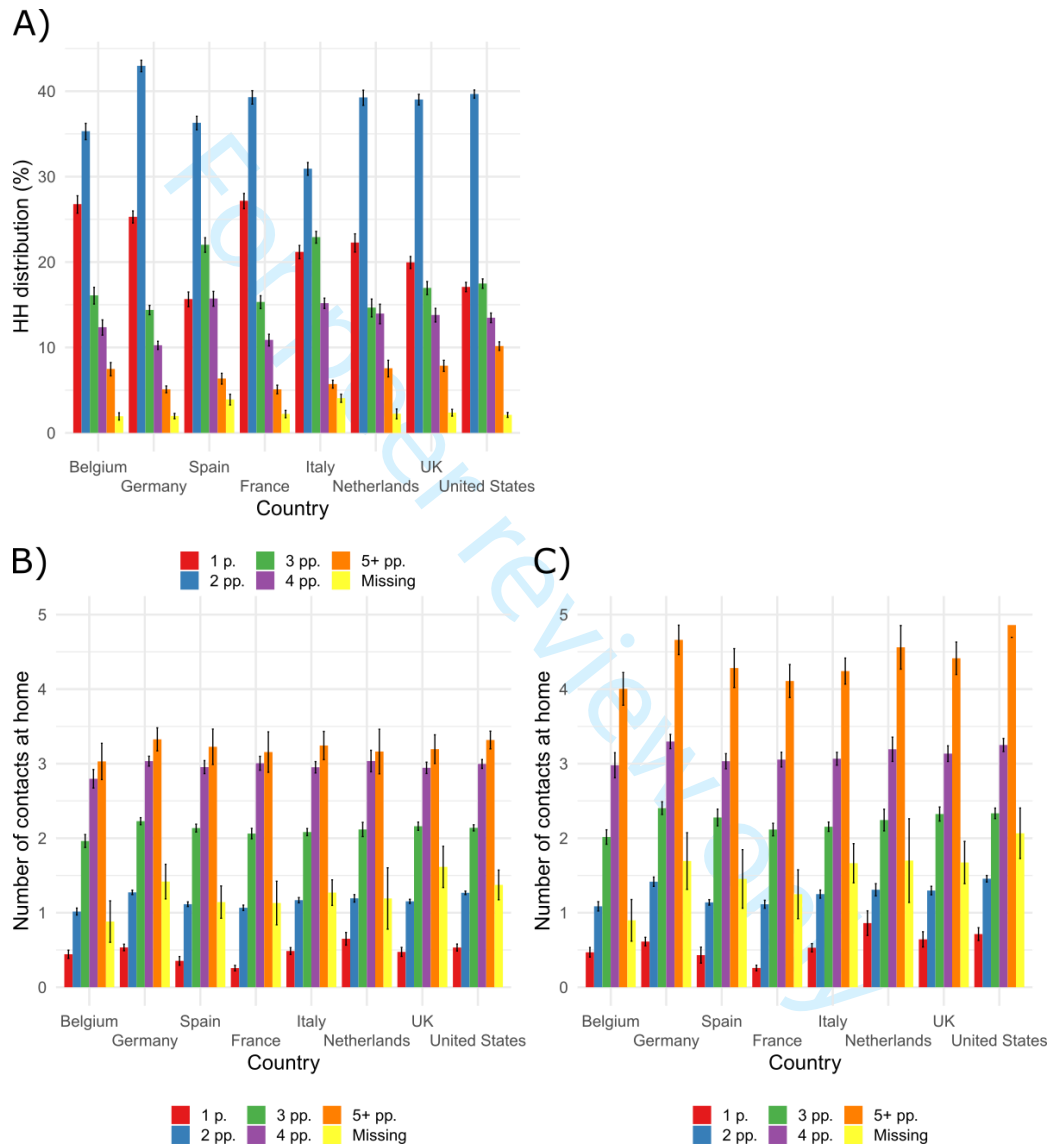

**Fig. S6.** Household size distribution by country (A), compared to the average number of contacts at home by household size and country, under the 90% quantile threshold (B), and under the  $\leq 29$  threshold.



**Fig. S7.** Exponentiated coefficients (with 95% confidence interval) for the socio-demographic and behavioural variables included in the negative binomial regression model for the number of overall daily contacts reported by participants in each country. Respondents with contacts above the 90% quantile threshold were removed from the analysis.





**Fig. S8.** Exponentiated coefficients (with 95% confidence interval) for the socio-demographic and behavioural variables included in the negative binomial regression model for the number of overall daily contacts reported by participants in each country. Respondents with contacts above the  $\leq 29$  threshold were removed from the analysis.

(A)



(B)



**Fig. S9.** Model-predicted daily number of overall social contacts, by age group, country, and week, March-April 2020. (A). Comparison of model-predicted overall contact numbers between the pre-COVID period and calendar week 2020-15, by country (B). Respondents with contacts above the 90% quantile threshold were removed from the analysis.

(A)



(B)



**Fig. S10.** Model-predicted daily number of social contacts at home, by age group, country, and week, March-April 2020. (A). Comparison of model-predicted overall contact numbers between the pre-COVID period and calendar week 2020-15, by country (B). Respondents with contacts above the 90% quantile threshold were removed from the analysis.

(A)



(B)



**Fig. S11.** Model-predicted daily number of social contacts at work, by age group, country, and week, March-April 2020. (A). Comparison of model-predicted contact numbers at work between the pre-COVID period and calendar week 2020-15, by country (B). Respondents with contacts above the 90% quantile threshold were removed from the analysis.

(A)

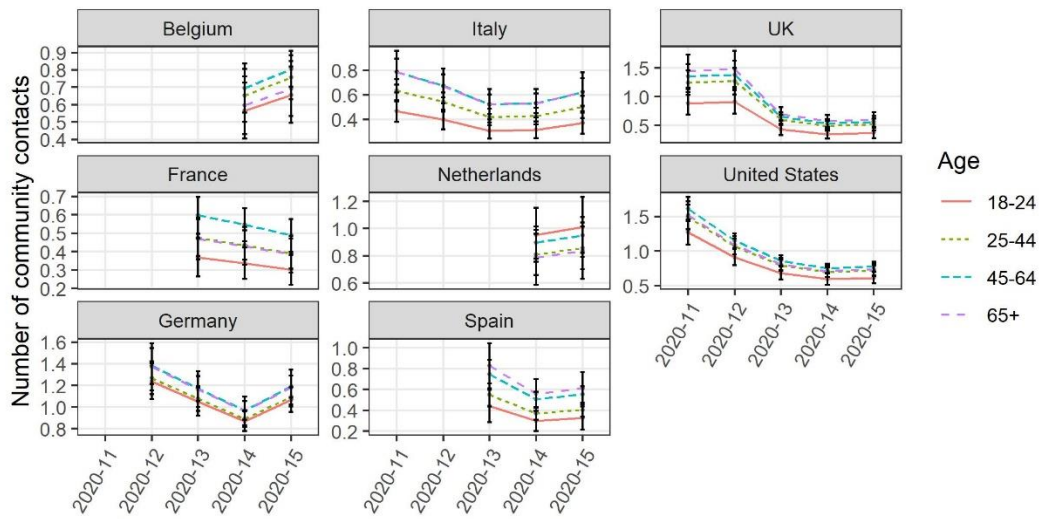

(B)

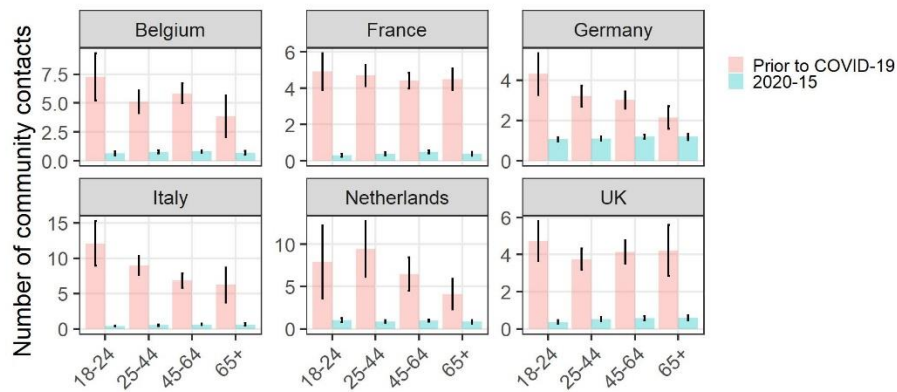

**Fig. S12.** Model-predicted daily number of social contacts in the general community, by age group, country, and week, March-April 2020. (A). Comparison of model-predicted contact numbers in the general community between the pre-COVID period and calendar week 2020-15, by country (B). Respondents with contacts above the 90% quantile threshold were removed from the analysis.

(A)



(B)



**Fig. S13.** Model-predicted daily number of overall social contacts, by age group, country, and week, March-April 2020. (A). Comparison of model-predicted overall contact numbers between the pre-COVID period and calendar week 2020-15, by country (B). Respondents with contacts above the  $\leq 29$  threshold were removed from the analysis.

(A)



(B)



**Fig. S14.** Model-predicted daily number of social contacts at home, by age group, country, and week, March-April 2020. (A). Comparison of model-predicted contact numbers at work between the pre-COVID period and calendar week 2020-15, by country (B). Respondents with contacts above the  $\leq 29$  threshold were removed from the analysis.

(A)



(B)

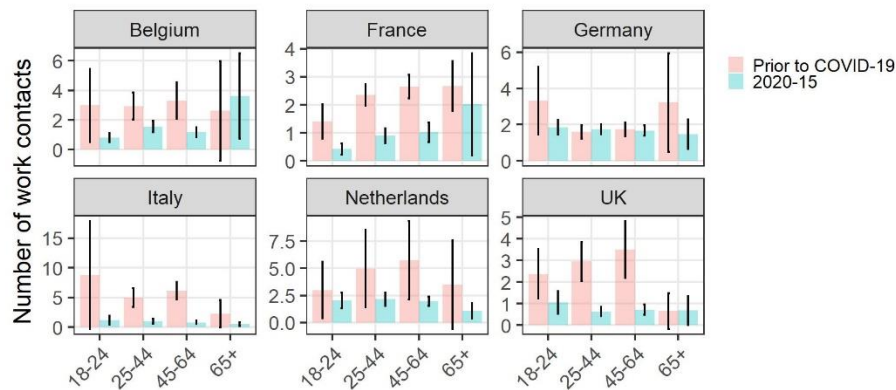

**Fig. S15.** Model-predicted daily number of social contacts at work, by age group, country, and week, March-April 2020. (A). Comparison of model-predicted contact numbers at work between the pre-COVID period and calendar week 2020-15, by country (B). Respondents with contacts above the  $\leq 29$  threshold were removed from the analysis.



(A)



(B)



**Fig. S16.** Model-predicted daily number of social contacts in the general community, by age group, country, and week, March-April 2020. (A). Comparison of model-predicted contact numbers in the general community between the pre-COVID period and calendar week 2020-15, by country (B). Respondents with contacts above the  $\leq 29$  threshold were removed from the analysis.

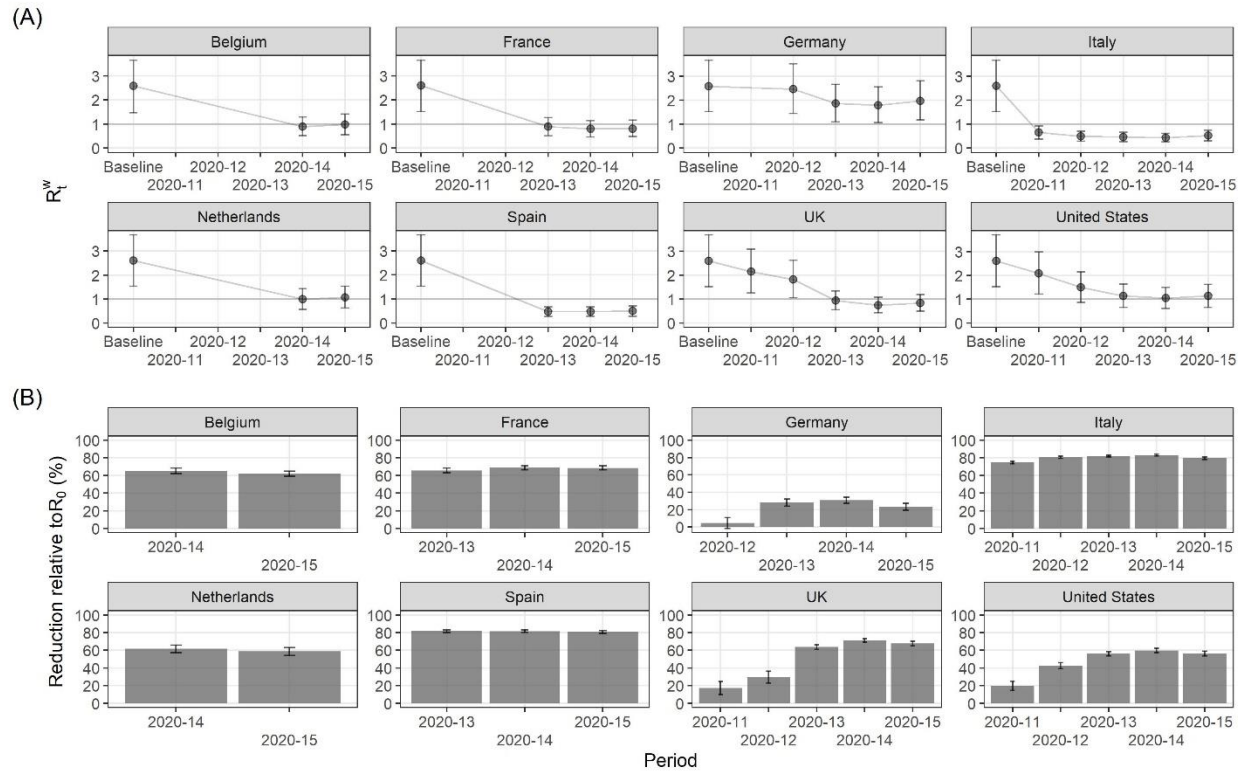

29 **Fig. S17.** Absolute change in the weekly net reproduction number  $R_t^w$  with respect to the basic  
 30 reproduction number  $R_0$  at baseline (A) and percent reduction with respect to  $R_0$  (B), by country and  
 31 calendar week. The 95% CIs are based on 5,000 replicates. Respondents with contacts above the  $\leq 29$   
 32 threshold were removed from the analysis.  
 33  
 34  
 35  
 36  
 37  
 38  
 39  
 40  
 41  
 42  
 43  
 44  
 45  
 46  
 47  
 48  
 49  
 50  
 51  
 52  
 53  
 54  
 55  
 56  
 57  
 58  
 59  
 60

## Additional tables

### Comparison between the raw and the weighted samples

In Tables S1-S8, for each country, we describe participants in terms of the variables used for the stratification and the construction of the Facebook advertising campaigns, comparing the unweighted sample to the weighted sample, and to the overall population.

We found that, in all countries, women were overrepresented in the sample. Moreover, respondents were more uniformly spread across regions than in the real population. Finally, no trend in terms of age was found when comparing the raw and the adjusted sample distributions. We also noted that the unweighted sample size for the 65+ age group (who are at higher risk of death from COVID-19 [21], and who usually have lower social media participation rates [22]) was fairly large, with the Netherlands, UK, and the US showing higher percentages than in the population.

**Table S1.** Characteristics of survey participants in Belgium (N=3504), by region of residence, age group, and sex. We compare the raw sample (“unweighted”) to the sample adjusted with the post-stratification weights (“weighted”), and to the distribution of each stratum in the population.

| Variable         | Category        | Unweighted |       | Weighted |       | Population |
|------------------|-----------------|------------|-------|----------|-------|------------|
|                  |                 | N          | %     | N        | %     | %          |
| <b>Region</b>    | <b>Brussels</b> | 605        | 17.3% | 359      | 10.3% | 10.3%      |
|                  | <b>Flanders</b> | 1329       | 37.9% | 2033     | 58.0% | 58.0%      |
|                  | <b>Wallonia</b> | 1570       | 44.8% | 1112     | 31.7% | 31.7%      |
| <b>Age group</b> | <b>18-24</b>    | 623        | 17.8% | 479      | 13.7% | 13.7%      |
|                  | <b>25-44</b>    | 1075       | 30.7% | 1092     | 31.2% | 31.2%      |
|                  | <b>45-64</b>    | 1172       | 33.5% | 1135     | 32.4% | 32.4%      |
|                  | <b>65+</b>      | 634        | 18.1% | 797      | 22.8% | 22.8%      |
| <b>Sex</b>       | <b>Female</b>   | 2395       | 68.4% | 1791     | 51.1% | 51.1%      |
|                  | <b>Male</b>     | 1109       | 31.7% | 1713     | 48.9% | 48.9%      |

**Table S2.** Characteristics of survey participants in Germany (N=8135), by region of residence, age group, and sex. We compare the raw sample (“unweighted”) to the sample adjusted with the post-stratification weights (“weighted”), and to the distribution of each stratum in the population.

| Variable         | Category      | Unweighted |       | Weighted |       | Population |
|------------------|---------------|------------|-------|----------|-------|------------|
|                  |               | N          | %     | N        | %     | %          |
| <b>Region*</b>   | <b>East</b>   | 1996       | 24.5% | 1436     | 17.7% | 17.7%      |
|                  | <b>North</b>  | 1871       | 23.0% | 1472     | 18.1% | 18.1%      |
|                  | <b>South</b>  | 36         | 25.0% | 2362     | 29.0% |            |
|                  | <b>West</b>   | 2232       | 27.4% | 2865     | 35.2% | 35.2%      |
| <b>Age group</b> | <b>18-24</b>  | 1764       | 21.7% | 977      | 12.0% | 12.0%      |
|                  | <b>25-44</b>  | 3142       | 38.6% | 2346     | 28.8% | 28.8%      |
|                  | <b>45-64</b>  | 2144       | 26.4% | 2785     | 34.2% | 34.2%      |
|                  | <b>65+</b>    | 1085       | 13.3% | 2028     | 24.9% | 24.9%      |
| <b>Sex</b>       | <b>Female</b> | 5149       | 63.3% | 4147     | 51.0% | 51.0%      |
|                  | <b>Male</b>   | 2986       | 36.7% | 3988     | 49.0% | 49.0%      |

\* The “East” region includes Berlin, Brandenburg, Sachsen, Sachsen-Anhalt, and Thüringen; the “North” regions includes Bremen, Hamburg, Mecklenburg-Vorpommern, Niedersachsen, and Schleswig-Holstein; the “South” region includes Baden-Württemberg and Bayern; the “West” region includes Hessen, Nordrhein-Westfalen, Rheinland-Pfalz, and Saarland.

**Table S3.** Characteristics of survey participants in Spain (N=4965), by region of residence, age group, and sex. We compare the raw sample (“unweighted”) to the sample adjusted with the post-stratification weights (“weighted”), and to the distribution of each stratum in the population.

| Variable         | Category         | Unweighted |       | Weighted |       | Population |
|------------------|------------------|------------|-------|----------|-------|------------|
|                  |                  | N          | %     | N        | %     | %          |
| <b>Region*</b>   | <b>Central</b>   | 608        | 12.3% | 592      | 11.9% | 11.9%      |
|                  | <b>East</b>      | 1166       | 23.5% | 1444     | 29.1% | 29.1%      |
|                  | <b>Insular</b>   | 387        | 7.8%  | 238      | 4.8%  | 4.8%       |
|                  | <b>Madrid</b>    | 774        | 15.6% | 697      | 14.0% | 14.0%      |
|                  | <b>Northeast</b> | 569        | 11.5% | 474      | 9.6%  | 9.6%       |
|                  | <b>Northwest</b> | 690        | 13.9% | 471      | 9.5%  | 9.5%       |
|                  | <b>South</b>     | 771        | 15.5% | 1049     | 21.1% | 21.1%      |
| <b>Age group</b> | <b>18-24</b>     | 392        | 7.9%  | 573      | 11.6% | 11.6%      |
|                  | <b>25-44</b>     | 1858       | 37.4% | 1582     | 31.9% | 31.9%      |
|                  | <b>45-64</b>     | 2016       | 40.6% | 1680     | 33.8% | 33.8%      |
|                  | <b>65+</b>       | 699        | 14.1% | 1130     | 22.8% | 22.8%      |
| <b>Sex</b>       | <b>Female</b>    | 3490       | 70.3% | 2553     | 51.4% | 51.4%      |
|                  | <b>Male</b>      | 1475       | 29.7% | 2412     | 48.6% | 48.6%      |

\* The region “Central” includes Castilla y León, Castilla-la Mancha, and Extremadura; the region “East” includes Cataluña, Comunidad Valenciana, and Illes Balears; the region “Insular” includes Canarias; the region “Northeast” includes País Vasco, Comunidad Foral de Navarra, La Rioja, and Aragón; the region “Northwest” includes Galicia, Principado de Asturias, and Cantabria; the region “South” includes Andalucía, Región de Murcia, Ciudad Autónoma de Ceuta, and Ciudad Autónoma de Melilla.

**Table S4.** Characteristics of survey participants in France (N=4637), by region of residence, age group, and sex. We compare the raw sample (“unweighted”) to the sample adjusted with the post-stratification weights (“weighted”), and to the distribution of each stratum in the population.

| Variable         | Category             | Unweighted |       | Weighted |       | Population |
|------------------|----------------------|------------|-------|----------|-------|------------|
|                  |                      | N          | %     | N        | %     | %          |
| <b>Region</b>    | <b>Île de France</b> | 678        | 14.6% | 862      | 18.6% | 18.5%      |
|                  | <b>Northeast</b>     | 971        | 20.9% | 1027     | 22.2% | 22.0%      |
|                  | <b>Southeast</b>     | 978        | 21.1% | 941      | 20.3% | 20.2%      |
|                  | <b>Southwest</b>     | 994        | 21.4% | 871      | 18.8% | 18.7%      |
|                  | <b>West</b>          | 1016       | 21.9% | 936      | 20.2% | 20.1%      |
| <b>Age group</b> | <b>18-24</b>         | 818        | 17.6% | 660      | 14.2% | 14.2%      |
|                  | <b>25-44</b>         | 1448       | 31.2% | 1365     | 29.4% | 29.4%      |
|                  | <b>45-64</b>         | 1576       | 34.0% | 1467     | 31.6% | 31.6%      |
|                  | <b>65</b>            | 795        | 17.1% | 1146     | 24.7% | 24.7%      |
| <b>Sex</b>       | <b>Female</b>        | 3300       | 71.2% | 2422     | 52.2% | 52.2%      |
|                  | <b>Male</b>          | 1337       | 28.8% | 2215     | 47.8% | 47.8%      |

\* The region “Northeast” includes Bourgogne - Franche-Comté, Nord-Pas-de-Calais – Picardie, and Alsace - Champagne-Ardenne – Lorraine; the region “Southeast” includes Auvergne - Rhône-Alpes, Provence-Alpes-Côte d'Azur, and Corse; the region “Southwest” includes Aquitaine - Limousin - Poitou-Charentes, and Languedoc-Roussillon - Midi-Pyrénées; the region “West” includes Centre - Val de Loire, Normandie, Pays-de-la-Loire, and Bretagne.

**Table S5.** Characteristics of survey participants in Italy (N=7532), by region of residence, age group, and sex. We compare the raw sample (“unweighted”) to the sample adjusted with the post-stratification weights (“weighted”), and to the distribution of each stratum in the population.

| Variable         | Category         | Unweighted |       | Weighted |       | Population |
|------------------|------------------|------------|-------|----------|-------|------------|
|                  |                  | N          | %     | N        | %     | %          |
| <b>Region*</b>   | <b>Central</b>   | 1605       | 21.3% | 1504     | 20.0% | 20.0%      |
|                  | <b>Insular</b>   | 795        | 10.6% | 829      | 11.0% | 11.0%      |
|                  | <b>Northeast</b> | 1885       | 25.0% | 1453     | 19.3% | 19.3%      |
|                  | <b>Northwest</b> | 2257       | 30.0% | 2011     | 26.7% | 26.7%      |
|                  | <b>South</b>     | 990        | 13.1% | 1735     | 23.0% | 23.0%      |
| <b>Age group</b> | <b>18-24</b>     | 1550       | 20.6% | 846      | 11.2% | 11.2%      |
|                  | <b>25-44</b>     | 3083       | 40.9% | 2114     | 28.1% | 28.1%      |
|                  | <b>45-64</b>     | 2034       | 27.0% | 2591     | 34.4% | 34.4%      |
|                  | <b>65+</b>       | 865        | 11.5% | 1981     | 26.3% | 26.3%      |
| <b>Sex</b>       | <b>Female</b>    | 4905       | 65.1% | 3897     | 51.7% | 51.7%      |
|                  | <b>Male</b>      | 2627       | 34.9% | 3635     | 48.3% | 48.3%      |

\* The region “Central” includes Toscana, Umbria, Marche, and Lazio; the region “Insular” includes Sicilia and Sardegna; the region “Northeast” includes Provincia Autonoma di Bolzano/Bozen, Provincia Autonoma di Trento, Veneto, Friuli-Venezia Giulia, and Emilia-Romagna; the region “Northwest” includes Piemonte, Valle d'Aosta/Vallée d'Aoste, Liguria, and Lombardia; the region “South” includes Abruzzo, Molise, Campania, Puglia, Basilicata, and Calabria.

**Table S6.** Characteristics of survey participants in the Netherlands (N=3172), by region of residence, age group, and sex. We compare the raw sample (“unweighted”) to the sample adjusted with the post-stratification weights (“weighted”), and to the distribution of each stratum in the population.

| Variable         | Category      | Unweighted |       | Weighted |       | Population |
|------------------|---------------|------------|-------|----------|-------|------------|
|                  |               | N          | %     | N        | %     | %          |
| <b>Region*</b>   | <b>East</b>   | 793        | 25.0% | 664      | 20.9% | 20.9%      |
|                  | <b>North</b>  | 654        | 20.6% | 319      | 10.1% | 10.1%      |
|                  | <b>South</b>  | 802        | 25.3% | 682      | 21.5% | 21.5%      |
|                  | <b>West</b>   | 923        | 29.1% | 1506     | 47.5% | 47.5%      |
| <b>Age group</b> | <b>18-24</b>  | 447        | 14.1% | 465      | 14.7% | 14.7%      |
|                  | <b>25-44</b>  | 793        | 25.0% | 928      | 29.3% | 29.3%      |
|                  | <b>45-64</b>  | 1191       | 37.6% | 1056     | 33.3% | 33.3%      |
|                  | <b>65+</b>    | 741        | 23.4% | 723      | 22.8% | 22.8%      |
| <b>Sex</b>       | <b>Female</b> | 2134       | 67.3% | 1606     | 50.6% | 50.6%      |
|                  | <b>Male</b>   | 1038       | 32.7% | 1566     | 49.4% | 49.4%      |

\* The region “East” includes Overijssel, Gelderland, and Flevoland; the region “North” includes Groningen, Friesland, and Drenthe; the region “South” includes Noord-Brabant and Limburg; the region “West” includes Utrecht, Noord-Holland, Zuid-Holland, and Zeeland.



**Table S7.** Characteristics of survey participants in the United Kingdom (N=7371), by region of residence, age group, and sex. We compare the raw sample (“unweighted”) to the sample adjusted with the post-stratification weights (“weighted”), and to the distribution of each stratum in the population.

| Variable         | Category                | Unweighted |       | Weighted |       | Population |
|------------------|-------------------------|------------|-------|----------|-------|------------|
|                  |                         | N          | %     | N        | %     | %          |
| <b>Region</b>    | <b>England</b>          | 3381       | 45.9% | 5225     | 70.9% | 70.9%      |
|                  | <b>London</b>           | 763        | 10.4% | 974      | 13.2% | 13.2%      |
|                  | <b>Northern Ireland</b> | 547        | 7.4%  | 203      | 2.8%  | 2.8%       |
|                  | <b>Scotland</b>         | 1548       | 21.0% | 618      | 8.4%  | 8.4%       |
|                  | <b>Wales</b>            | 1132       | 15.4% | 351      | 4.8%  | 4.8%       |
| <b>Age group</b> | <b>18-24</b>            | 577        | 7.8%  | 1056     | 14.3% | 14.3%      |
|                  | <b>25-44</b>            | 1831       | 24.8% | 2346     | 31.8% | 31.8%      |
|                  | <b>45-64</b>            | 3044       | 41.3% | 2316     | 31.4% | 31.4%      |
|                  | <b>65+</b>              | 1919       | 26.0% | 1653     | 22.4% | 22.4%      |
| <b>Sex</b>       | <b>Female</b>           | 4789       | 65.0% | 3762     | 51.0% | 51.0%      |
|                  | <b>Male</b>             | 2582       | 35.0% | 3609     | 49.0% | 49.0%      |

**Table S8.** Characteristics of survey participants in the United States (N=11917), by region of residence, age group, and sex. We compare the raw sample (“unweighted”) to the sample adjusted with the post-stratification weights (“weighted”), and to the distribution of each stratum in the population.

| Variable         | Category         | Unweighted |       | Weighted |       | Population |
|------------------|------------------|------------|-------|----------|-------|------------|
|                  |                  | N          | %     | N        | %     | %          |
| <b>Region*</b>   | <b>Midwest</b>   | 3206       | 26.9% | 2490     | 20.9% | 20.9%      |
|                  | <b>Northeast</b> | 2673       | 22.4% | 2088     | 17.5% | 17.5%      |
|                  | <b>South</b>     | 2950       | 24.8% | 4507     | 37.8% | 37.8%      |
|                  | <b>West</b>      | 3088       | 25.9% | 2832     | 23.8% | 23.8%      |
| <b>Age group</b> | <b>18-24</b>     | 1308       | 11.0% | 1923     | 16.1% | 16.1%      |
|                  | <b>25-44</b>     | 3227       | 27.1% | 3889     | 32.6% | 32.6%      |
|                  | <b>45-64</b>     | 4075       | 34.2% | 3757     | 31.5% | 31.5%      |
|                  | <b>65+</b>       | 3307       | 27.8% | 2348     | 19.7% | 19.7%      |
| <b>Sex</b>       | <b>Female</b>    | 7900       | 66.3% | 6098     | 51.2% | 51.2%      |
|                  | <b>Male</b>      | 4017       | 33.7% | 5819     | 48.8% | 48.8%      |

\* The region “Midwest” includes Illinois, Indiana, Iowa, Kansas, Michigan, Minnesota, Missouri, Nebraska, North Dakota, Ohio, South Dakota, and Wisconsin; the region “Northeast” includes Connecticut, Maine, Massachusetts, New Hampshire, New Jersey, New York, Pennsylvania, Rhode Island, and Vermont; the region “South” includes Alabama, Arkansas, Delaware, Florida, Georgia, Kentucky, Louisiana, Maryland, Mississippi, North Carolina, Oklahoma, South Carolina, Tennessee, Texas, Virginia, and West Virginia; the region “West” includes Alaska, Arizona, California, Colorado, Hawaii, Idaho, Montana, Nevada, New Mexico, Oregon, Utah, Washington, and Wyoming.

## Effect for the contact threshold values

Tables S9-S16 compare the contact threshold scenario presented in the manuscript, where individuals who reported more contacts than the 90% quantile of the contact distribution per setting were removed, with the scenario considered in the sensitivity analysis, where individuals who reported 30 or more contacts per setting were removed. For each scenario, we show the minimum, the median, and the first and the third quartile, and the maximum number of contacts for each setting and overall, as well as the number of missing values (either because the participant did not report it or because he or she reported a number of contacts above the considered threshold).

Under the 90% quantile scenario used in the main analysis, the number of missing values (due either to respondents who did not provide any contact number or who reported a number of contacts above the threshold) was much higher than under the  $\leq 29$  scenario. Even though these thresholds might lead to different average contacts numbers, which is a metric not robust to outliers, the effect on the median and the quartiles was much smaller, with differences between the two outliers' scenarios mainly found in Germany, the Netherlands, and the United States for the home contacts (and hence for the overall contacts).

**Table S9.** Contact distribution by threshold in each setting and overall, for Belgium (N=3704).

| Threshold                   | Statistic                 | Overall | Home | School | Work | General community |
|-----------------------------|---------------------------|---------|------|--------|------|-------------------|
| <b>90%<br/>quantile</b>     | <b>Minimum</b>            | 0       | 0    | 0      | 0    | 0                 |
|                             | <b>First quartile</b>     | 1       | 0    | 0      | 0    | 0                 |
|                             | <b>Median</b>             | 2       | 1    | 0      | 0    | 0                 |
|                             | <b>Third quartile</b>     | 3       | 2    | 0      | 0    | 1                 |
|                             | <b>Maximum</b>            | 14      | 4    | 0      | 8    | 5                 |
|                             | <b>No. missing values</b> | 625     | 162  | 52     | 304  | 195               |
| <b><math>\leq 29</math></b> | <b>Minimum</b>            | 0       | 0    | 0      | 0    | 0                 |
|                             | <b>First quartile</b>     | 1       | 0    | 0      | 0    | 0                 |
|                             | <b>Median</b>             | 2       | 1    | 0      | 0    | 0                 |
|                             | <b>Third quartile</b>     | 4       | 2    | 0      | 0    | 1                 |
|                             | <b>Maximum</b>            | 45      | 13   | 17     | 26   | 29                |
|                             | <b>No. missing values</b> | 144     | 1    | 2      | 127  | 23                |

**Table S10.** Contact distribution by threshold in each setting and overall, for Germany (N=8135).

| Threshold               | Statistic                 | Overall | Home | School | Work | General community |
|-------------------------|---------------------------|---------|------|--------|------|-------------------|
| <b>90%<br/>quantile</b> | <b>Minimum</b>            | 0       | 0    | 0      | 0    | 0                 |
|                         | <b>First quartile</b>     | 1       | 1    | 0      | 0    | 0                 |
|                         | <b>Median</b>             | 3       | 1    | 0      | 0    | 0                 |
|                         | <b>Third quartile</b>     | 5       | 2    | 0      | 0    | 2                 |
|                         | <b>Maximum</b>            | 16      | 4    | 0      | 8    | 5                 |
|                         | <b>No. Missing values</b> | 2124    | 490  | 92     | 1154 | 867               |
| <b>≤ 29</b>             | <b>Minimum</b>            | 0       | 0    | 0      | 0    | 0                 |
|                         | <b>First quartile</b>     | 2       | 1    | 0      | 0    | 0                 |
|                         | <b>Median</b>             | 4       | 1    | 0      | 0    | 1                 |
|                         | <b>Third quartile</b>     | 7       | 3    | 0      | 1    | 2                 |
|                         | <b>Maximum</b>            | 61      | 29   | 24     | 28   | 27                |
|                         | <b>No. Missing values</b> | 527     | 14   | 8      | 402  | 167               |

**Table S11.** Contact distribution by threshold in each setting and overall, for Spain (N=4965).

| Threshold               | Statistic                 | Overall | Home | School | Work | General community |
|-------------------------|---------------------------|---------|------|--------|------|-------------------|
| <b>90%<br/>quantile</b> | <b>Minimum</b>            | 0       | 0    | 0      | 0    | 0                 |
|                         | <b>First quartile</b>     | 1       | 1    | 0      | 0    | 0                 |
|                         | <b>Median</b>             | 2       | 1    | 0      | 0    | 0                 |
|                         | <b>Third quartile</b>     | 3       | 3    | 0      | 0    | 0                 |
|                         | <b>Maximum</b>            | 14      | 4    | 0      | 8    | 5                 |
|                         | <b>No. Missing values</b> | 717     | 193  | 71     | 333  | 229               |
| <b>≤ 29</b>             | <b>Minimum</b>            | 0       | 0    | 0      | 0    | 0                 |
|                         | <b>First quartile</b>     | 1       | 1    | 0      | 0    | 0                 |
|                         | <b>Median</b>             | 2       | 2    | 0      | 0    | 0                 |
|                         | <b>Third quartile</b>     | 4       | 3    | 0      | 0    | 1                 |
|                         | <b>Maximum</b>            | 76      | 28   | 25     | 28   | 25                |
|                         | <b>No. Missing values</b> | 188     | 12   | 6      | 139  | 52                |

**Table S12.** Contact distribution by threshold in each setting and overall, for France (N=4637).

| Threshold           | Statistic                 | Overall | Home | School | Work | General community |
|---------------------|---------------------------|---------|------|--------|------|-------------------|
| <b>90% quantile</b> | <b>Minimum</b>            | 0       | 0    | 0      | 0    | 0                 |
|                     | <b>First quartile</b>     | 1       | 0    | 0      | 0    | 0                 |
|                     | <b>Median</b>             | 2       | 1    | 0      | 0    | 0                 |
|                     | <b>Third quartile</b>     | 3       | 2    | 0      | 0    | 0                 |
|                     | <b>Maximum</b>            | 15      | 4    | 0      | 8    | 5                 |
|                     | <b>No. Missing values</b> | 706     | 159  | 63     | 350  | 246               |
| <b>≤ 29</b>         | <b>Minimum</b>            | 0       | 0    | 0      | 0    | 0                 |
|                     | <b>First quartile</b>     | 1       | 0    | 0      | 0    | 0                 |
|                     | <b>Median</b>             | 2       | 1    | 0      | 0    | 0                 |
|                     | <b>Third quartile</b>     | 4       | 2    | 0      | 0    | 1                 |
|                     | <b>Maximum</b>            | 54      | 18   | 25     | 28   | 25                |
|                     | <b>No. Missing values</b> | 214     | 4    | 7      | 169  | 60                |

**Table S13.** Contact distribution by threshold in each setting and overall, for Italy (N=7532).

| Threshold           | Statistic                 | Overall | Home | School | Work | General community |
|---------------------|---------------------------|---------|------|--------|------|-------------------|
| <b>90% quantile</b> | <b>Minimum</b>            | 0       | 0    | 0      | 0    | 0                 |
|                     | <b>First quartile</b>     | 1       | 1    | 0      | 0    | 0                 |
|                     | <b>Median</b>             | 2       | 2    | 0      | 0    | 0                 |
|                     | <b>Third quartile</b>     | 3       | 3    | 0      | 0    | 0                 |
|                     | <b>Maximum</b>            | 16      | 4    | 0      | 8    | 5                 |
|                     | <b>No. Missing values</b> | 1034    | 380  | 82     | 474  | 213               |
| <b>≤ 29</b>         | <b>Minimum</b>            | 0       | 0    | 0      | 0    | 0                 |
|                     | <b>First quartile</b>     | 1       | 1    | 0      | 0    | 0                 |
|                     | <b>Median</b>             | 2       | 2    | 0      | 0    | 0                 |
|                     | <b>Third quartile</b>     | 4       | 3    | 0      | 0    | 1                 |
|                     | <b>Maximum</b>            | 42      | 22   | 22     | 25   | 23                |
|                     | <b>No. Missing values</b> | 194     | 12   | 5      | 167  | 25                |

**Table S14.** Contact distribution by threshold in each setting and overall, for the Netherlands (N=3172).

| Threshold           | Statistic                 | Overall | Home | School | Work | General community |
|---------------------|---------------------------|---------|------|--------|------|-------------------|
| <b>90% quantile</b> | <b>Minimum</b>            | 0       | 0    | 0      | 0    | 0                 |
|                     | <b>First quartile</b>     | 1       | 1    | 0      | 0    | 0                 |
|                     | <b>Median</b>             | 2       | 1    | 0      | 0    | 0                 |
|                     | <b>Third quartile</b>     | 4       | 2    | 0      | 0    | 2                 |
|                     | <b>Maximum</b>            | 17      | 4    | 0      | 8    | 5                 |
|                     | <b>No. Missing values</b> | 718     | 204  | 43     | 398  | 226               |
| <b>≤ 29</b>         | <b>Minimum</b>            | 0       | 0    | 0      | 0    | 0                 |
|                     | <b>First quartile</b>     | 1       | 1    | 0      | 0    | 0                 |
|                     | <b>Median</b>             | 3       | 1    | 0      | 0    | 0                 |
|                     | <b>Third quartile</b>     | 7       | 3    | 0      | 0    | 2                 |
|                     | <b>Maximum</b>            | 46      | 20   | 18     | 29   | 25                |
|                     | <b>No. Missing values</b> | 135     | 8    | 2      | 106  | 28                |

**Table S15.** Contact distribution by threshold in each setting and overall, for the UK (N=7371).

| Threshold           | Statistic                 | Overall | Home | School | Work | General community |
|---------------------|---------------------------|---------|------|--------|------|-------------------|
| <b>90% quantile</b> | <b>Minimum</b>            | 0       | 0    | 0      | 0    | 0                 |
|                     | <b>First quartile</b>     | 1       | 1    | 0      | 0    | 0                 |
|                     | <b>Median</b>             | 2       | 1    | 0      | 0    | 0                 |
|                     | <b>Third quartile</b>     | 3       | 2    | 0      | 0    | 1                 |
|                     | <b>Maximum</b>            | 15      | 4    | 0      | 8    | 5                 |
|                     | <b>No. Missing values</b> | 1633    | 426  | 175    | 773  | 713               |
| <b>≤ 29</b>         | <b>Minimum</b>            | 0       | 0    | 0      | 0    | 0                 |
|                     | <b>First quartile</b>     | 1       | 1    | 0      | 0    | 0                 |
|                     | <b>Median</b>             | 2       | 1    | 0      | 0    | 0                 |
|                     | <b>Third quartile</b>     | 5       | 3    | 0      | 0    | 2                 |
|                     | <b>Maximum</b>            | 79      | 25   | 25     | 29   | 29                |
|                     | <b>No. Missing values</b> | 478     | 16   | 34     | 353  | 170               |

**Table S16.** Contact distribution by threshold in each setting and overall, for the US (N=11,917).

| Threshold       | Statistic          | Overall | Home | School | Work | General community |
|-----------------|--------------------|---------|------|--------|------|-------------------|
| 90%<br>quantile | Minimum            | 0       | 0    | 0      | 0    | 0                 |
|                 | First quartile     | 1       | 1    | 0      | 0    | 0                 |
|                 | Median             | 2       | 1    | 0      | 0    | 0                 |
|                 | Third quartile     | 4       | 2    | 0      | 0    | 1                 |
|                 | Maximum            | 17      | 4    | 0      | 8    | 5                 |
|                 | No. Missing values | 3131    | 1036 | 197    | 1330 | 1340              |
| ≤ 29            | Minimum            | 0       | 0    | 0      | 0    | 0                 |
|                 | First quartile     | 1       | 1    | 0      | 0    | 0                 |
|                 | Median             | 3       | 1    | 0      | 0    | 0                 |
|                 | Third quartile     | 6       | 3    | 0      | 0    | 2                 |
|                 | Maximum            | 60      | 28   | 22     | 29   | 28                |
|                 | No. Missing values | 819     | 27   | 47     | 561  | 306               |

**Table S17.** Model-predicted mean number (with standard error (SE)) of daily contacts per person compared with pre-pandemic model predictions, by country, setting, and week, March-April 2020. The “Overall” category encompasses contacts reported in all four surveyed settings, e.g., home, school, work, and general community. Respondents with contacts above the  $\leq 29$  threshold were removed from the analysis.

| Country        | Setting   | Prior to COVID-19 |      | Week 2020-11 (Mar 9 – 15) |      | Week 2020-12 (Mar 16 – 22) |      | Week 2020-13 (Mar 23 – 29) |      | Week 2020-14 (Mar 30 – Apr 5) |      | Week 2020-15 (Apr 6 – 12) |      |
|----------------|-----------|-------------------|------|---------------------------|------|----------------------------|------|----------------------------|------|-------------------------------|------|---------------------------|------|
|                |           | Mean              | SE   | Mean                      | SE   | Mean                       | SE   | Mean                       | SE   | Mean                          | SE   | Mean                      | SE   |
|                |           | Belgium           | Home | 3.15                      | 0.15 |                            |      |                            |      |                               |      | 1.49                      | 0.05 |
|                | Community | 5.34              | 0.3  |                           |      |                            |      |                            |      | 1.25                          | 0.14 | 1.24                      | 0.06 |
|                | Work      | 3.05              | 0.36 |                           |      |                            |      |                            |      | 1.07                          | 0.19 | 1.36                      | 0.13 |
|                | Total     | 11.78             | 0.48 |                           |      |                            |      |                            |      | 3.77                          | 0.23 | 4.11                      | 0.13 |
| France         | Home      | 2.7               | 0.07 |                           |      |                            |      | 1.49                       | 0.08 | 1.49                          | 0.06 | 1.48                      | 0.08 |
|                | Community | 4.59              | 0.13 |                           |      |                            |      | 1.07                       | 0.1  | 0.97                          | 0.08 | 0.8                       | 0.08 |
|                | Work      | 2.37              | 0.12 |                           |      |                            |      | 0.87                       | 0.15 | 0.82                          | 0.13 | 0.9                       | 0.12 |
|                | Total     | 10.3              | 0.21 |                           |      |                            |      | 3.37                       | 0.19 | 3.08                          | 0.12 | 3.08                      | 0.15 |
| Germany        | Home      | 2.73              | 0.1  |                           |      | 1.93                       | 0.08 | 1.65                       | 0.04 | 1.74                          | 0.04 | 1.83                      | 0.05 |
|                | Community | 2.97              | 0.14 |                           |      | 2.78                       | 0.21 | 1.84                       | 0.1  | 1.68                          | 0.07 | 2.11                      | 0.08 |
|                | Work      | 1.82              | 0.17 |                           |      | 2.54                       | 0.31 | 1.67                       | 0.16 | 1.88                          | 0.14 | 1.71                      | 0.12 |
|                | Total     | 8.03              | 0.27 |                           |      | 6.83                       | 0.32 | 5.16                       | 0.18 | 4.96                          | 0.12 | 5.49                      | 0.14 |
| Italy          | Home      | 3.56              | 0.19 | 1.9                       | 0.05 | 1.84                       | 0.05 | 1.74                       | 0.04 | 1.7                           | 0.04 | 1.82                      | 0.06 |
|                | Community | 7.91              | 0.36 | 1.1                       | 0.08 | 0.77                       | 0.05 | 0.63                       | 0.05 | 0.67                          | 0.05 | 0.89                      | 0.1  |
|                | Work      | 5.28              | 0.53 | 1.29                      | 0.15 | 0.72                       | 0.08 | 0.74                       | 0.16 | 0.48                          | 0.06 | 0.88                      | 0.17 |
|                | Total     | 18.19             | 0.61 | 4.35                      | 0.15 | 3.32                       | 0.11 | 3.08                       | 0.1  | 2.91                          | 0.1  | 3.5                       | 0.19 |
| Netherlands    | Home      | 3                 | 0.23 |                           |      |                            |      |                            |      | 1.92                          | 0.06 | 1.97                      | 0.07 |
|                | Community | 7.13              | 0.76 |                           |      |                            |      |                            |      | 1.43                          | 0.1  | 1.59                      | 0.1  |
|                | Work      | 4.97              | 1.08 |                           |      |                            |      |                            |      | 2.23                          | 0.2  | 2.02                      | 0.17 |
|                | Total     | 15.03             | 1.2  |                           |      |                            |      |                            |      | 5.11                          | 0.18 | 5.5                       | 0.21 |
| Spain          | Home      |                   |      |                           |      |                            |      | 1.8                        | 0.05 | 1.91                          | 0.06 | 1.84                      | 0.05 |
|                | Community |                   |      |                           |      |                            |      | 0.89                       | 0.08 | 0.82                          | 0.07 | 0.99                      | 0.08 |
|                | Work      |                   |      |                           |      |                            |      | 0.68                       | 0.11 | 0.7                           | 0.09 | 0.97                      | 0.14 |
|                | Total     |                   |      |                           |      |                            |      | 3.44                       | 0.15 | 3.45                          | 0.13 | 3.64                      | 0.14 |
| United Kingdom | Home      | 3.54              | 0.14 | 2.25                      | 0.09 | 2.21                       | 0.11 | 1.76                       | 0.04 | 1.72                          | 0.05 | 1.76                      | 0.05 |
|                | Community | 4.07              | 0.21 | 3.73                      | 0.31 | 3.16                       | 0.3  | 1                          | 0.06 | 0.8                           | 0.06 | 0.81                      | 0.09 |
|                | Work      | 2.89              | 0.39 | 3.76                      | 0.9  | 2.47                       | 0.37 | 1.17                       | 0.11 | 0.63                          | 0.1  | 0.71                      | 0.12 |
|                | Total     | 10.58             | 0.35 | 8.77                      | 0.47 | 7.46                       | 0.46 | 3.85                       | 0.13 | 3.07                          | 0.11 | 3.41                      | 0.16 |
| United States  | Home      |                   |      | 2.29                      | 0.08 | 2.17                       | 0.05 | 2.1                        | 0.04 | 1.97                          | 0.03 | 2.1                       | 0.04 |
|                | Community |                   |      | 3.77                      | 0.19 | 2.27                       | 0.12 | 1.42                       | 0.07 | 1.09                          | 0.05 | 1.42                      | 0.08 |
|                | Work      |                   |      | 2.36                      | 0.26 | 2.29                       | 0.27 | 1.39                       | 0.11 | 1.45                          | 0.16 | 1.39                      | 0.15 |
|                | Total     |                   |      | 8.81                      | 0.31 | 6.3                        | 0.2  | 4.81                       | 0.13 | 4.42                          | 0.13 | 4.79                      | 0.14 |



## References

- 1 Perrotta D, Grow A, Rampazzo F, *et al.* Behaviours and attitudes in response to the COVID-19 pandemic: insights from a cross-national Facebook survey. *EPJ Data Sci* 2021;**10**:1–13. doi:10.1140/epjds/s13688-021-00270-1
- 2 Grow A, Perrotta D, Del Fava E, *et al.* Addressing Public Health Emergencies via Facebook Surveys: Advantages, Challenges, and Practical Considerations. *J Med Internet Res* 2020;**22**:e20653. doi:10.2196/20653
- 3 Eurostat. *Eurostat regional yearbook: 2019 edition.* 2019. [http://publications.europa.eu/publication/manifestation\\_identifier/PUB\\_KSHA19001ENN](http://publications.europa.eu/publication/manifestation_identifier/PUB_KSHA19001ENN) (accessed 15 May 2020).
- 4 Ipsos. Public Opinion on the Coronavirus outbreak: a multi-country poll from Ipsos. 2020. <https://www.ipsos.com/en/coronavirus-public-opinion> (accessed 15 May 2020).
- 5 Pötzschke S, Braun M. Migrant Sampling Using Facebook Advertisements: A Case Study of Polish Migrants in Four European Countries. *Soc Sci Comput Rev* 2016;**35**:633–53. doi:10.1177/0894439316666262
- 6 Hoffman Pham K, Rampazzo F, Rosenzweig LR. Online Surveys and Digital Demography in the Developing World: Facebook Users in Kenya. *ArXiv191003448 Cs* Published Online First: 8 October 2019. <http://arxiv.org/abs/1910.03448> (accessed 1 Dec 2019).
- 7 Zhang B, Mildenerger M, Howe PD, *et al.* Quota sampling using Facebook advertisements. *Polit Sci Res Methods* 2018;:1–7. doi:10.1017/psrm.2018.49
- 8 Keiding N, Louis TA. Perils and potentials of self-selected entry to epidemiological studies and surveys. *J R Stat Soc Ser A Stat Soc* 2016;**179**:319–76. doi:10.1111/rssa.12136
- 9 Mercer AW, Kreuter F, Keeter S, *et al.* Theory and Practice in Nonprobability Surveys Parallels between Causal Inference and Survey Inference. *Public Opin Q* 2017;**81**:250–71. doi:10.1093/poq/nfw060
- 10 US Census Bureau. 2018 Population Estimates by Age, Sex, Race and Hispanic Origin. U. S. Census Bur. <https://www.census.gov/newsroom/press-kits/2019/detailed-estimates.html> (accessed 15 May 2020).
- 11 Mossong J, Hens N, Jit M, *et al.* Social Contacts and Mixing Patterns Relevant to the Spread of Infectious Diseases. *PLoS Med* 2008;**5**:e74. doi:10.1371/journal.pmed.0050074
- 12 Béraud G, Kazmierczak S, Beutels P, *et al.* The French Connection: The First Large Population-Based Contact Survey in France Relevant for the Spread of Infectious Diseases. *PLoS ONE* 2015;**10**:e0133203. doi:10.1371/journal.pone.0133203
- 13 Teslya A, Pham TM, Godijk NG, *et al.* Impact of self-imposed prevention measures and short-term government-imposed social distancing on mitigating and delaying a COVID-19 epidemic: A modelling study. *PLoS Med* 2020;**17**:e1003166. doi:10.1371/journal.pmed.1003166

- 1  
2  
3 14 Chu DK, Akl EA, Duda S, *et al.* Physical distancing, face masks, and eye protection to prevent  
4 person-to-person transmission of SARS-CoV-2 and COVID-19: a systematic review and meta-  
5 analysis. *The Lancet* 2020;**395**:1973–87. doi:10.1016/S0140-6736(20)31142-9  
6
- 7 15 Diekmann O, Heesterbeek JAP, Metz JAJ. On the definition and the computation of the basic  
8 reproduction ratio  $R_0$  in models for infectious diseases in heterogeneous populations. *J Math Biol*  
9 1990;**28**:365–82. doi:10.1007/BF00178324  
10
- 11 16 Wallinga J, Teunis P, Kretzschmar M. Using Data on Social Contacts to Estimate Age-specific  
12 Transmission Parameters for Respiratory-spread Infectious Agents. *Am J Epidemiol* 2006;**164**:936–  
13 44. doi:10.1093/aje/kwj317  
14
- 15 17 Coletti P, Wambua J, Gimma A, *et al.* CoMix: comparing mixing patterns in the Belgian population  
16 during and after lockdown. *Sci Rep* 2020;**10**:21885. doi:10.1038/s41598-020-78540-7  
17
- 18 18 Feehan DM, Mahmud AS. Quantifying population contact patterns in the United States during the  
19 COVID-19 pandemic. *Nat Commun* 2021;**12**:893. doi:10.1038/s41467-021-20990-2  
20
- 21 19 Jarvis CI, Van Zandvoort K, Gimma A, *et al.* Quantifying the impact of physical distance measures on  
22 the transmission of COVID-19 in the UK. *BMC Med* 2020;**18**:124. doi:10.1186/s12916-020-01597-8  
23
- 24 20 Arregui S, Aleta A, Sanz J, *et al.* Projecting social contact matrices to different demographic  
25 structures. *PLoS Comput Biol* 2018;**14**:e1006638. doi:10.1371/journal.pcbi.1006638  
26
- 27 21 WHO. Transmission of SARS-CoV-2: implications for infection prevention precautions.  
28 2020.[https://www.who.int/news-room/commentaries/detail/transmission-of-sars-cov-2-implications-](https://www.who.int/news-room/commentaries/detail/transmission-of-sars-cov-2-implications-for-infection-prevention-precautions)  
29 [for-infection-prevention-precautions](https://www.who.int/news-room/commentaries/detail/transmission-of-sars-cov-2-implications-for-infection-prevention-precautions) (accessed 24 Aug 2020).  
30  
31
- 32 22 Quinn K. Social media and social wellbeing in later life. *Ageing Soc* 2019;**1**–22.  
33 doi:10.1017/S0144686X19001570  
34  
35  
36  
37  
38  
39  
40  
41  
42  
43  
44  
45  
46  
47  
48  
49  
50  
51  
52  
53  
54  
55  
56  
57  
58  
59  
60

Table 1 STROBE Statement—Checklist of items that should be included in reports of **cross-sectional studies**

|                              | Item No | Recommendation                                                                                                                                                                                    | Page |
|------------------------------|---------|---------------------------------------------------------------------------------------------------------------------------------------------------------------------------------------------------|------|
| <b>Title and abstract</b>    | 1       | (a) Indicate the study's design with a commonly used term in the title or the abstract                                                                                                            | 1    |
|                              |         | (b) Provide in the abstract an informative and balanced summary of what was done and what was found                                                                                               | 2    |
| <b>Introduction</b>          |         |                                                                                                                                                                                                   |      |
| Background/rationale         | 2       | Explain the scientific background and rationale for the investigation being reported                                                                                                              | 4    |
| Objectives                   | 3       | State specific objectives, including any prespecified hypotheses                                                                                                                                  | 4-5  |
| <b>Methods</b>               |         |                                                                                                                                                                                                   |      |
| Study design                 | 4       | Present key elements of study design early in the paper                                                                                                                                           | 5    |
| Setting                      | 5       | Describe the setting, locations, and relevant dates, including periods of recruitment, exposure, follow-up, and data collection                                                                   | 5    |
| Participants                 | 6       | (a) Give the eligibility criteria, and the sources and methods of selection of participants                                                                                                       | 5    |
| Variables                    | 7       | Clearly define all outcomes, exposures, predictors, potential confounders, and effect modifiers. Give diagnostic criteria, if applicable                                                          | 6    |
| Data sources/<br>measurement | 8*      | For each variable of interest, give sources of data and details of methods of assessment (measurement). Describe comparability of assessment methods if there is more than one group              | 6    |
| Bias                         | 9       | Describe any efforts to address potential sources of bias                                                                                                                                         | 5    |
| Study size                   | 10      | Explain how the study size was arrived at                                                                                                                                                         |      |
| Quantitative variables       | 11      | Explain how quantitative variables were handled in the analyses. If applicable, describe which groupings were chosen and why                                                                      | 6-7  |
| Statistical methods          | 12      | (a) Describe all statistical methods, including those used to control for confounding                                                                                                             | 6-8  |
|                              |         | (b) Describe any methods used to examine subgroups and interactions                                                                                                                               | 6    |
|                              |         | (c) Explain how missing data were addressed                                                                                                                                                       | 6    |
|                              |         | (d) If applicable, describe analytical methods taking account of sampling strategy                                                                                                                |      |
|                              |         | (e) Describe any sensitivity analyses                                                                                                                                                             | 6    |
| <b>Results</b>               |         |                                                                                                                                                                                                   |      |
| Participants                 | 13*     | (a) Report numbers of individuals at each stage of study—eg numbers potentially eligible, examined for eligibility, confirmed eligible, included in the study, completing follow-up, and analysed | 8    |
|                              |         | (b) Give reasons for non-participation at each stage                                                                                                                                              | 8    |
|                              |         | (c) Consider use of a flow diagram                                                                                                                                                                | -    |

1  
2  
3  
4  
5  
6  
7  
8  
9  
10  
11  
12  
13  
14  
15  
16  
17  
18  
19  
20  
21  
22  
23  
24  
25  
26  
27  
28  
29  
30  
31  
32  
33  
34  
35  
36  
37  
38  
39  
40  
41  
42  
43  
44  
45  
46  
47  
48  
49  
50  
51  
52  
53  
54  
55  
56  
57  
58  
59  
60

|                          |     |                                                                                                                                                                                                              |                |
|--------------------------|-----|--------------------------------------------------------------------------------------------------------------------------------------------------------------------------------------------------------------|----------------|
| Descriptive data         | 14* | (a) Give characteristics of study participants (eg demographic, clinical, social) and information on exposures and potential confounders                                                                     | 5, Suppl. Mat. |
|                          |     | (b) Indicate number of participants with missing data for each variable of interest                                                                                                                          | 6, Suppl. Mat. |
| Outcome data             | 15* | Report numbers of outcome events or summary measures                                                                                                                                                         | 9-11           |
| Main results             | 16  | (a) Give unadjusted estimates and, if applicable, confounder-adjusted estimates and their precision (eg, 95% confidence interval). Make clear which confounders were adjusted for and why they were included | 12-13          |
|                          |     | (b) Report category boundaries when continuous variables were categorized                                                                                                                                    |                |
|                          |     | (c) If relevant, consider translating estimates of relative risk into absolute risk for a meaningful time period                                                                                             |                |
| Other analyses           | 17  | Report other analyses done—eg analyses of subgroups and interactions, and sensitivity analyses                                                                                                               | 9-11           |
| <b>Discussion</b>        |     |                                                                                                                                                                                                              |                |
| Key results              | 18  | Summarise key results with reference to study objectives                                                                                                                                                     | 14-15          |
| Limitations              | 19  | Discuss limitations of the study, taking into account sources of potential bias or imprecision. Discuss both direction and magnitude of any potential bias                                                   | 15-17          |
| Interpretation           | 20  | Give a cautious overall interpretation of results considering objectives, limitations, multiplicity of analyses, results from similar studies, and other relevant evidence                                   | 15-17          |
| Generalisability         | 21  | Discuss the generalisability (external validity) of the study results                                                                                                                                        | 15-16          |
| <b>Other information</b> |     |                                                                                                                                                                                                              |                |
| Funding                  | 22  | Give the source of funding and the role of the funders for the present study and, if applicable, for the original study on which the present article is based                                                | 20             |

\*Give information separately for exposed and unexposed groups.

**Note:** An Explanation and Elaboration article discusses each checklist item and gives methodological background and published examples of transparent reporting. The STROBE checklist is best used in conjunction with this article (freely available on the Web sites of PLoS Medicine at <http://www.plosmedicine.org/>, Annals of Internal Medicine at <http://www.annals.org/>, and Epidemiology at <http://www.epidem.com/>). Information on the STROBE Initiative is available at [www.strobe-statement.org](http://www.strobe-statement.org).
